# Supplementary material for: Gene Expression Program Underlying Tail Resorption During Thyroid Hormone-Dependent Metamorphosis of the Ornamented Pygmy Frog Microhyla fissipes
Source: Front Endocrinol (Lausanne). 2019 Jan 25;10:11. doi: 10.3389/fendo.2019.00011 (PMC6357680; doi:10.3389/fendo.2019.00011)
Supplement: Supplementary file 1 [file Table_1.pdf]

**Table S1.** Summary of sequencing and annotation statistics\*.

| SMRT Sequencing  |                     |             |             |                 | Database                                         | Number of Transcripts       | Annotation Rate (%)                        |
|------------------|---------------------|-------------|-------------|-----------------|--------------------------------------------------|-----------------------------|--------------------------------------------|
| Index            | Total Nucleotides   | 108,614,218 |             |                 | NR                                               | 47,112                      | 69                                         |
|                  | All Transcripts     | 67,939      |             |                 | NT                                               | 34,376                      | 51                                         |
|                  | Length (200-500 bp) | 149         |             |                 | KEGG                                             | 31,219                      | 46                                         |
|                  | Length (>500-1 kb)  | 16,938      |             |                 | SwissProt                                        | 42,850                      | 63                                         |
|                  | Length (1k-2k bp)   | 29,938      | Annotation  |                 | PFAM                                             | 39,822                      | 59                                         |
|                  | Length (>2k bp)     | 20,914      |             |                 | GO                                               | 41,254                      | 61                                         |
|                  | Mean length         | 1,599       |             |                 | KOG                                              | 23,217                      | 34                                         |
|                  | Max length          | 8,847       |             |                 | Annotated in all databases                       | 14,755                      | 22                                         |
|                  | N50                 | 1,956       |             |                 | Annotated in at least one                        | 52,881                      | 78                                         |
|                  | Tail Sample Stage   | Raw Reads   | Clean Reads | Clean Bases (G) | Reads mapped to SMRT Sequences (Mapping Rate, %) | Total Expressed Transcripts | Total Differentially Expressed Transcripts |
| Illumina RNA-Seq | S39_1               | 55,552,298  | 53,791,200  | 8.07G           | 33,920,962 (63.06)                               | 50,577                      | 4,555                                      |
|                  | S39_2               | 52,655,948  | 50,780,062  | 7.62G           | 24,868,472 (48.97)                               |                             |                                            |
|                  | S39_3               | 61,860,648  | 60,078,372  | 9.01G           | 41,010,354 (68.26)                               |                             |                                            |
|                  | S40_1               | 54,579,738  | 52,955,948  | 7.94G           | 34,743,530 (65.61)                               |                             |                                            |
|                  | S40_2               | 55,347,336  | 53,758,202  | 8.06G           | 36,672,612 (68.22)                               |                             |                                            |
|                  | S40_3               | 49,016,642  | 47,597,972  | 7.14G           | 30,202,684 (63.45)                               |                             |                                            |
|                  | S41_1               | 47,821,448  | 46,390,360  | 6.96G           | 36,530,468 (67.48)                               |                             |                                            |
|                  | S41_2               | 55,367,586  | 53,703,782  | 8.06G           | 36,530,468 (68.02)                               |                             |                                            |
|                  | S41_3               | 47,986,070  | 46,516,764  | 6.98G           | 30,388,544 (65.33)                               |                             |                                            |
|                  | S43_1               | 52,716,544  | 50,486,292  | 7.57G           | 21,951,654 (43.48)                               |                             |                                            |
|                  | S43_2               | 52,974,420  | 51,209,534  | 7.68G           | 19,024,704 (37.15)                               |                             |                                            |
|                  | S43_3               | 57,584,078  | 55,416,696  | 8.31G           | 24,868,472 (54.62)                               |                             |                                            |

\*Total RNA was isolated from heart, liver, spleen, lung, kidney, skin, ovary, and testis from an adult *M. fissipes* as well as from tails at four stages (S38, S40, S41, S43) and dorsal muscle at three stages (S36, S43, S45). The RNA was sequenced on a PacBio RSII platform. All high-quality short reads from the RNA-Seq from the tails at eight developmental stages (S18, S19, S21, S28, S39, S40, S41, and S43) were used to error-correct the SMRT sequences by using the Proovread correction software. Totally 108,614,218 nucleotides and 67,939 transcripts with an average length of 1,599 bp and N50 of 1,956 bp were obtained. The N50 value is defined as the contig length where half of the assembled transcripts were represented by contigs of this size or longer. In addition, 47,112; 34,376; 31,219; 42,850; 39,822; 41,254 and 23,217 transcripts were annotated through NR, NT, KEGG, Swiss-Prot, PFAM, GO and KOG databases, respectively. In the end, 52,881 transcripts (78% of the 67,939 transcripts) were annotated in at least one database (Table S1). In order to address the gene expression program underlying tail resorption, we used Illumina RNA-Seq clean reads of four key tail resorption stages (S39, S40, S41, S43) mapping to proofread-corrected reference sequences. Finally, the gene expression level was determined by using RSEM software [Li, 2011 #4213]. 50,577 expressed transcripts with FPKM (fragments per kilobase of exon model per million mapped reads) > 0.3 were identified in the tail among the four metamorphic stages (S39, S40, S41, S43) and 4,555 DETs during natural metamorphosis were discovered through Pair-wise comparisons.
