# Supplementary material for: Gene Expression Program Underlying Tail Resorption During Thyroid Hormone-Dependent Metamorphosis of the Ornamented Pygmy Frog Microhyla fissipes
Source: PubMed Central journal article supplement (PMC6357680; doi:10.3389/fendo.2019.00011), 2019-01-25
Supplement: Table_2.pdf [file Table_2.pdf]

**Table S2.** All tail DETs among the four stages during natural metamorphosis.

4,555 DETs were obtained by pair-wise comparison of gene expression among the four stages and listed with detail sequence data, containing FPKM of 12 samples (four stages and three repeats).

| Gene ID            | NR Description                 | NR GI     | NR ID       | Fpkm_S39_1 | Fpkm_S39_2 | Fpkm_S39_3 | Fpkm_S40_1 | Fpkm_S40_2 | Fpkm_S40_3 | Fpkm_S41_1 | Fpkm_S41_2 | Fpkm_S41_3 | Fpkm_S43_1 | Fpkm_S43_2 | Fpkm_S43_3 |
|--------------------|--------------------------------|-----------|-------------|------------|------------|------------|------------|------------|------------|------------|------------|------------|------------|------------|------------|
| 3-6.c1441/5/4345   | PREDICTED: myosin-4 [Xer       | 847156920 | XP_01282446 | 0          | 1.04       | 0          | 0          | 0          | 0          | 53.63      | 49.46      | 85.87      | 0          | 0          | 0          |
| 2-3.c2233/16/1957  | PREDICTED: pre-mRNA 3'-        | 847088065 | XP_01281946 | 0          | 72.71      | 0          | 0          | 0          | 0          | 18.65      | 39.37      | 32.99      | 0.26       | 20.03      | 0          |
| 3-6.c13156/2/2931  | PREDICTED: obscurin isofo      | 847141105 | XP_01282121 | 37.5       | 0          | 17.5       | 26.73      | 20.25      | 26.46      | 0          | 0          | 0          | 0          | 0          | 9.92       |
| 2-3.c41191/3/2279  | PREDICTED: nebulin isofo       | 847166510 | XP_01282661 | 14.42      | 7.55       | 42.69      | 0.22       | 0          | 0          | 51.48      | 26.53      | 72.64      | 7.06       | 43.11      | 41.39      |
| 3-6.c13721/1/3884  | PREDICTED: RNA-binding         | 847153751 | XP_01282364 | 12.01      | 0          | 7.59       | 10.48      | 7.5        | 14.19      | 0          | 0          | 0          | 0          | 0          | 13.24      |
| 2-3.c1136/122/2087 | DEAD (Asp-Glu-Ala-Asp) bt      | 171847235 | AAI61473.1  | 0          | 27.76      | 7.27       | 0          | 0          | 0          | 15.45      | 13         | 23         | 0          | 6.24       | 0          |
| 2-3.c47767/1/2410  | repressor of RNA polymerase    | 148228865 | NP_00108070 | 0          | 33.47      | 20.46      | 0          | 0          | 0          | 28.99      | 29.25      | 32         | 69.28      | 51.19      | 22.13      |
| 3-6.c13897/1/4006  | PREDICTED: dynactin subu       | 512817195 | XP_00491135 | 0          | 17.81      | 4.46       | 0          | 0          | 0          | 8.07       | 5.29       | 10.76      | 13.79      | 0          | 15.1       |
| 2-3.c53364/1/2475  | --                             | --        | --          | 0          | 0          | 0          | 0          | 0          | 0          | 10.93      | 12.4       | 13.23      | 0          | 1.98       | 5.14       |
| 2-3.c62424/4/2099  | --                             | --        | --          | 26.4       | 0          | 14.52      | 23.9       | 14.39      | 12.44      | 0          | 0          | 0          | 0          | 0          | 56.76      |
| 2-3.c27791/1/2087  | ryanodine receptor beta isofo  | 29501272  | BAA04647.2  | 5.48       | 0.3        | 26.99      | 22.12      | 14         | 12.8       | 0          | 0          | 0          | 0          | 4.44       | 6.31       |
| 1-2.c35161/1/1523  | PREDICTED: paraplegin [Xc      | 301608280 | XP_00293370 | 35.57      | 7.16       | 6.49       | 0          | 0          | 0.08       | 12.83      | 24.59      | 30.31      | 19.41      | 28.24      | 0          |
| 1-2.c3283/3/1520   | coatomer subunit alpha [Xenc   | 189230284 | NP_00112146 | 0          | 0          | 0          | 0          | 0          | 0          | 19.84      | 15.62      | 19.46      | 0          | 0          | 75.59      |
| 2-3.c35035/1/2188  | --                             | --        | --          | 9.41       | 0.72       | 12.39      | 13.14      | 9.72       | 14.01      | 0          | 0          | 0          | 10.07      | 6.61       | 5.59       |
| 2-3.c1892/15/2499  | PREDICTED: myosin-4-like       | 847156931 | XP_01282446 | 0          | 0          | 58.82      | 0          | 0          | 0.68       | 47.07      | 35.29      | 31.9       | 0          | 0          | 0          |
| 1-2.c28106/2/1421  | --                             | --        | --          | 13.53      | 35.51      | 0.49       | 0          | 0          | 0          | 18.31      | 10.01      | 24.78      | 0          | 10.41      | 9.49       |
| 3-6.c7577/2/3351   | PREDICTED: obscurin isofo      | 847141062 | XP_01282115 | 23.33      | 0.27       | 33.09      | 37.91      | 30.53      | 40.16      | 0.42       | 0.18       | 0          | 0          | 0          | 13.23      |
| 2-3.c61888/2/2470  | gsn protein [Xenopus (Silurar  | 159155320 | AAI54876.1  | 0          | 0.01       | 0          | 8.95       | 7.89       | 7.71       | 0          | 0          | 0          | 20.77      | 0          | 12.35      |
| 2-3.c7227/1/2395   | PREDICTED: dynactin subu       | 847096031 | XP_01281121 | 0          | 37.3       | 6.29       | 0.08       | 0          | 0.2        | 21.91      | 8.78       | 20.83      | 45.33      | 0          | 45.17      |
| 3-6.c18138/1/2699  | --                             | --        | --          | 2.69       | 6.58       | 0          | 0          | 0          | 0          | 3.74       | 5.46       | 9.09       | 0          | 0          | 1.47       |
| 2-3.c41733/1/1985  | 2-oxoglutarate dehydrogenas    | 148231573 | NP_00108361 | 0          | 0          | 4.92       | 10.31      | 7.38       | 10.26      | 0          | 0          | 0          | 0          | 0          | 0          |
| 1-2.c7280/1/1456   | alanine aminotransferase 2 [X  | 147898847 | NP_00108610 | 0          | 6.04       | 0          | 0          | 0          | 0          | 13.1       | 6.21       | 15.21      | 39.73      | 51.45      | 6.56       |
| 1-2.c33588/1/1278  | NmrA-like family domain-co     | 226371956 | ACO51603.1  | 0.43       | 2.92       | 3.16       | 0          | 0          | 0          | 19.24      | 18.38      | 11.01      | 0          | 2.11       | 2.65       |
| 1-2.c43620/1/1741  | hedgehog acyltransferase-like  | 147901798 | NP_00107945 | 21.02      | 0          | 0          | 23.27      | 23.69      | 7.12       | 0          | 0          | 0          | 0          | 0.63       | 3.94       |
| 2-3.c7627/1/2303   | LOC100170459 protein [Xen      | 189441985 | AAI67321.1  | 0          | 0          | 0          | 0          | 0          | 0.06       | 7.34       | 6.04       | 8.2        | 0          | 0          | 26.14      |
| 1-2.c22445/2/1199  | v-ral simian leukemia viral ot | 156717550 | NP_00109631 | 0          | 39.05      | 0          | 0          | 0          | 0.22       | 15.64      | 19.02      | 16.56      | 0          | 0          | 0          |
| 1-2.c36862/1/1190  | PREDICTED: LOW QUALI           | 823461821 | XP_00417457 | 35.19      | 0          | 0          | 0          | 0          | 0          | 95.21      | 48.58      | 22.49      | 35.75      | 49.21      | 5.63       |
| 1-2.c21098/1/1790  | --                             | --        | --          | 16.32      | 3.56       | 3.26       | 0          | 0          | 0          | 4.92       | 7.43       | 7.3        | 7.3        | 8.73       | 0.55       |
| 1-2.c16956/2/1310  | PREDICTED: propionyl-Co/       | 831302652 | XP_01268338 | 14.61      | 27.66      | 0          | 0          | 0          | 0          | 13.39      | 8.57       | 4.68       | 11.21      | 16.07      | 13.2       |
| 3-6.c12176/96/3037 | PREDICTED: endoplasmic, j      | 514758710 | XP_00502261 | 0          | 5.14       | 0          | 5.91       | 7.42       | 16.05      | 0          | 0          | 0.38       | 9.54       | 7.13       | 0.01       |
| 2-3.c19240/1/2186  | --                             | --        | --          | 3.26       | 26.87      | 0.04       | 0          | 0          | 0          | 2.99       | 3.61       | 5.23       | 7.62       | 5.28       | 5.57       |
| 1-2.c41203/1/1702  | --                             | --        | --          | 0.91       | 0.19       | 8.52       | 2.32       | 0          | 0          | 32.45      | 39.65      | 29.04      | 8.5        | 65.65      | 50.42      |
| 2-3.c51959/2/2303  | alanine aminotransferase 2 [X  | 147898847 | NP_00108610 | 20.5       | 0          | 7.32       | 17.95      | 15.11      | 4.19       | 0          | 0.03       | 0          | 0          | 0.02       | 3.25       |
| 2-3.c11669/5/2172  | PREDICTED: TATA-binding        | 733916099 | XP_01072015 | 3.56       | 19.25      | 4.35       | 2.32       | 3.31       | 7.97       | 0          | 0          | 0          | 0          | 0          | 0          |
| 2-3.c41096/1/2003  | --                             | --        | --          | 24.08      | 13.64      | 1.34       | 15.36      | 13.27      | 8.09       | 0          | 0          | 0          | 22.03      | 0          | 1.53       |
| 2-3.c4365/2/2244   | --                             | --        | --          | 0.74       | 13.61      | 0          | 0          | 0          | 0          | 4.47       | 2.68       | 2.71       | 0          | 0          | 0          |
| 2-3.c52049/2/2237  | --                             | --        | --          | 0.41       | 12.19      | 0.76       | 0.28       | 0          | 0          | 6.85       | 7.02       | 7.23       | 15.25      | 4.27       | 0.14       |
| 1-2.c20910/1/8680  | PREDICTED: tubulin alpha-      | 820994203 | XP_01236371 | 0          | 0          | 0          | 0          | 0          | 0          | 15.37      | 6.87       | 5.82       | 57.17      | 63.04      | 24.55      |
| 2-3.c36785/2/1936  | --                             | --        | --          | 0.86       | 7.92       | 5.07       | 0          | 0          | 0          | 5.67       | 1.63       | 3.78       | 1.09       | 0          | 0.21       |
| 2-3.c57641/1/1851  | PREDICTED: moesin isofo        | 847156257 | XP_01282436 | 0          | 8.3        | 2.77       | 4.72       | 1.72       | 8.39       | 0          | 0          | 0          | 0          | 0          | 0          |
| 3-6.c9057/1/2915   | protein NDRG1-B [Xenopus       | 147906416 | NP_00108062 | 0.49       | 1.5        | 0          | 0          | 0          | 0          | 3.79       | 1.55       | 1.46       | 0          | 1.08       | 0          |
| 1-2.c2630/24/1697  | PREDICTED: microtubule-at      | 847167931 | XP_01282705 | 0.88       | 13.93      | 5.61       | 9.71       | 6.17       | 2.64       | 0          | 0          | 0          | 0          | 0          | 1.91       |
| 3-6.c3590/4/2974   | PREDICTED: AP-1 complex        | 620946340 | XP_00767046 | 9.17       | 1.55       | 1.02       | 0          | 0          | 0          | 1.56       | 2.53       | 2.03       | 0.79       | 1.8        | 0          |
| 2-3.c4225/1/2520   | --                             | --        | --          | 18.72      | 0.12       | 0.09       | 15.03      | 14.65      | 3.47       | 0          | 0.03       | 0.05       | 0          | 5.96       | 12.09      |
| 2-3.c24293/1/2276  | --                             | --        | --          | 5.63       | 9.79       | 0.13       | 0          | 0          | 0          | 10.61      | 7.4        | 3.91       | 178.68     | 10.57      | 102.24     |
| 2-3.c2940/4/2236   | --                             | --        | --          | 4.3        | 3.87       | 0.92       | 0          | 0          | 0          | 3.61       | 3.95       | 1.01       | 0.73       | 2.42       | 3.69       |
| 1-2.c32719/1/1162  | Syntaxin-12 [Rana catesbeiar   | 226372600 | ACO51925.1  | 0          | 0          | 0          | 0          | 0          | 0          | 14.17      | 8.88       | 2.93       | 44.03      | 57.64      | 3.65       |
| 1-2.c28087/1/1379  | increased sodium tolerance 1   | 147903060 | NP_00108665 | 26.84      | 4.61       | 0          | 0          | 0          | 0          | 2.51       | 11.6       | 9.12       | 0          | 0.24       | 0          |
| 2-3.c26330/1/2172  | --                             | --        | --          | 14.72      | 62.57      | 0.82       | 15.1       | 16.98      | 32.21      | 0          | 0.19       | 0.23       | 42.72      | 31.7       | 90.68      |
| 1-2.c40050/2/1435  | --                             | --        | --          | 0          | 0          | 2.4        | 5.74       | 4.63       | 5.25       | 0          | 0          | 0          | 7.19       | 3.65       | 9.46       |
| 2-3.c40177/2/2081  | PREDICTED: 5'-3' exoribont     | 301620220 | XP_00293947 | 1.54       | 0.69       | 2.19       | 0          | 0          | 0          | 3.08       | 2.39       | 2.83       | 1.11       | 5.33       | 2.69       |
| 2-3.c49412/1/1982  | PREDICTED: uncharacterize      | 332219891 | XP_00325905 | 0          | 6.25       | 1.44       | 0          | 0          | 0.08       | 3.08       | 3.43       | 4.92       | 3.6        | 1.7        | 0          |
| 2-3.c59243/1/1988  | probable ATP-dependent RN      | 156717218 | NP_00109615 | 0          | 10.51      | 0          | 1.45       | 4.02       | 4.44       | 0          | 0          | 0          | 0          | 0          | 0          |
| 1-2.c42745/6/1737  | myosin, heavy chain 4, skelet  | 47575800  | NP_00100124 | 28.28      | 2.63       | 0          | 0          | 0          | 0          | 0          | 211.06     | 392.8      | 0          | 0          | 0          |

|                    |                                |           |             |        |         |       |       |        |        |        |        |        |        |        |        |
|--------------------|--------------------------------|-----------|-------------|--------|---------|-------|-------|--------|--------|--------|--------|--------|--------|--------|--------|
| 2-3.c19652/1/2088  | --                             | --        | --          | 0      | 13.09   | 9.56  | 0.05  | 0      | 0      | 9.32   | 9.11   | 32.65  | 0      | 6.88   | 15.21  |
| 1-2.c9178/2/1376   | --                             | --        | --          | 0      | 34.99   | 0     | 3.49  | 0      | 0      | 149.12 | 47.38  | 65.57  | 199.12 | 399.87 | 3.69   |
| 2-3.c20118/2/2131  | Unknown (protein for IMAG      | 197245540 | AAI69188.1  | 0.53   | 0.23    | 0     | 0     | 0      | 0      | 5.26   | 2.01   | 1.58   | 0      | 0      | 0      |
| 2-3.c56283/1/2248  | PREDICTED: ubiquitin carbo     | 847116837 | XP_01281604 | 2.9    | 4.63    | 3.25  | 3.08  | 2.96   | 1.85   | 0      | 0      | 0      | 0      | 0      | 4.74   |
| 2-3.c20505/2/1972  | PREDICTED: myosin-4 [Xer       | 847156920 | XP_01282446 | 171.75 | 0       | 0     | 0     | 0      | 0      | 0      | 437.51 | 275.86 | 0      | 0      | 0      |
| 3-6.c10108/1/3081  | hypoxia-inducible factor 1 al  | 166343757 | ABY86629.1  | 0.7    | 0       | 0     | 0     | 0      | 0      | 1.82   | 1.64   | 1.28   | 2.74   | 0      | 2.32   |
| 1-2.c8929/3/1527   | --                             | --        | --          | 0      | 0       | 1.27  | 0     | 0      | 0      | 10.01  | 2.82   | 3.69   | 5.42   | 0      | 8.97   |
| 1-2.c51783/5/1362  | collagen, type 1, alpha 2 prec | 147898763 | NP_00108072 | 0      | 1765.76 | 0     | 0     | 0      | 0      | 48.95  | 2.04   | 58.28  | 33.32  | 0      | 0      |
| 2-3.c20273/3/2456  | Unknown (protein for IMAG      | 197245540 | AAI69188.1  | 0      | 3.59    | 0     | 0     | 0.06   | 0      | 3.22   | 2.11   | 3.38   | 0      | 0      | 0      |
| 1-2.c13672/1/1172  | --                             | --        | --          | 4.53   | 58.34   | 26.79 | 2.43  | 1.25   | 2.54   | 28.85  | 37.42  | 57.11  | 8      | 67.98  | 55.34  |
| 1-2.c51597/201/175 | tyrosine 3-monooxygenase/tr    | 89515082  | ABD75373.1  | 1.08   | 177.11  | 82.16 | 0     | 129.73 | 113.06 | 0      | 0      | 0      | 83.57  | 0      | 91.29  |
| 2-3.c1621/73/1987  | nucleosome assembly protein    | 537227872 | ERE83488.1  | 3.05   | 7.88    | 0     | 1.38  | 6.48   | 4.31   | 0      | 0      | 0      | 0      | 0      | 0      |
| 1-2.c39930/1/1674  | --                             | --        | --          | 1.37   | 0       | 0     | 4.71  | 1.04   | 4.84   | 0      | 0      | 0      | 1.7    | 0.28   | 0      |
| 1-2.c6741/1/1788   | WD repeat-containing protein   | 147901327 | NP_00109144 | 0      | 4.42    | 0.25  | 0.1   | 0      | 0      | 3.12   | 5.28   | 3.54   | 3.01   | 5.76   | 0      |
| 1-2.c37842/2/1583  | PREDICTED: epsilon-sarcog      | 641796609 | XP_00816166 | 0      | 0       | 0     | 0.19  | 0      | 0      | 6.38   | 7.78   | 3.01   | 18.12  | 15.93  | 2.47   |
| 2-3.c31999/4/1960  | PREDICTED: angio-associat      | 602656532 | XP_00743395 | 0      | 8.61    | 0     | 0     | 0      | 0      | 1.87   | 2.34   | 3.13   | 0      | 0      | 0      |
| 1-2.c20983/1/1384  | --                             | --        | --          | 0      | 0.77    | 24.62 | 19.21 | 20.2   | 10.18  | 0.17   | 0      | 0.33   | 160.2  | 1.29   | 0.37   |
| 1-2.c41057/2/1395  | PREDICTED: ras suppressor      | 507973237 | XP_00469133 | 0.14   | 29.24   | 0.23  | 0     | 0      | 0      | 13.82  | 5.38   | 3.14   | 32.01  | 18.72  | 2.99   |
| 2-3.c2151/20/2271  | methionine-R-sulfoxide reduc   | 261399890 | NP_00100497 | 1.85   | 0       | 0.86  | 1.09  | 2.23   | 3.86   | 0      | 0      | 0      | 0.41   | 0      | 0      |
| 1-2.c22970/1/1459  | PREDICTED: triadin isoform     | 637253484 | XP_00811820 | 0      | 0       | 0     | 0     | 0      | 0      | 179.37 | 134.68 | 0      | 123.39 | 0      | 0      |
| 2-3.c30752/1/2047  | PREDICTED: splicing factor     | 823464129 | XP_01243043 | 0      | 0       | 1.3   | 0     | 0      | 0      | 3.26   | 1.74   | 1.84   | 2.87   | 0.31   | 0.15   |
| 1-2.c48124/2/1326  | LOC733385 protein [Xenopu      | 76779703  | AAI06651.1  | 0      | 1.14    | 1.98  | 0     | 4.19   | 0      | 25.33  | 32.13  | 28.97  | 1.16   | 36.64  | 2.34   |
| 1-2.c23008/2/1331  | --                             | --        | --          | 2.8    | 0       | 0     | 0     | 0      | 0      | 5.32   | 1.76   | 4.86   | 22.3   | 18.51  | 16.96  |
| 2-3.c42844/1/2482  | serine/threonine kinase 38 [X  | 147899268 | NP_00108041 | 1.04   | 2.05    | 0     | 0     | 0      | 0      | 3.1    | 1.29   | 1.06   | 0      | 0      | 0      |
| 2-3.c35643/1/2578  | polycomb protein SCMH1 [X      | 54262200  | NP_00100575 | 3.34   | 0.42    | 0     | 0     | 0      | 0      | 4.57   | 0.66   | 4.44   | 1.13   | 6.18   | 7.97   |
| 2-3.c40609/1/1885  | PREDICTED: nebulin isoform     | 847166508 | XP_01282661 | 0      | 2.26    | 1.75  | 0.1   | 0      | 0      | 5.08   | 2.98   | 2.62   | 1.27   | 0      | 0      |
| 1-2.c29316/1/1343  | increased sodium tolerance 1   | 147903060 | NP_00108665 | 27.56  | 0.55    | 7.32  | 0.49  | 0.84   | 0.49   | 13.23  | 17.2   | 13.63  | 20.85  | 36.91  | 1.44   |
| 2-3.c12246/5/1957  | PREDICTED: nebulin isoform     | 847166510 | XP_01282661 | 0      | 0       | 0     | 0     | 54.47  | 53.52  | 0      | 0      | 0      | 0      | 0      | 0      |
| 2-3.c54827/1/2299  | PREDICTED: uncharacterize      | 332219891 | XP_00325905 | 2.12   | 23.99   | 7.39  | 0.86  | 1.42   | 0.99   | 12.79  | 20.17  | 22.43  | 21     | 13.99  | 1.44   |
| 1-2.c23709/1/1265  | heat shock protein 110 [Xeno   | 91805313  | ABE65386.1  | 6.32   | 22.23   | 5.53  | 1.74  | 4.31   | 7.43   | 0      | 0      | 0      | 0      | 0      | 14.46  |
| 1-2.c45532/1/1394  | PREDICTED: basic proline-r     | 612060000 | XP_00750611 | 5.19   | 0       | 0     | 6.25  | 3.51   | 2.33   | 0      | 0      | 0      | 0      | 11.08  | 11.92  |
| 3-6.c15844/1/3295  | PREDICTED: nebulin isoform     | 847166495 | XP_01282660 | 0      | 0       | 0     | 0.5   | 79.45  | 125.19 | 0      | 0.05   | 0      | 0      | 0      | 0      |
| 3-6.c16115/1/3550  | glucosidase, alpha; neutral A1 | 148232724 | NP_00109123 | 1.6    | 3       | 0.62  | 0     | 0      | 0      | 1.64   | 1.38   | 0.35   | 0      | 0.83   | 5.16   |
| 2-3.c58589/4/2000  | vigilin [Xenopus (Silurana) tr | 55742112  | NP_00100685 | 0      | 0       | 0     | 0     | 0      | 0      | 57.62  | 79.51  | 0      | 0      | 0      | 23.49  |
| 1-2.c9374/2/1526.1 | PREDICTED: lipid phosphat      | 847087033 | XP_01281612 | 0.36   | 0       | 0     | 0.11  | 0      | 0      | 9.88   | 1.98   | 6.25   | 33.92  | 39.02  | 14.54  |
| 1-2.c37563/2/1783  | PREDICTED: keratin, type II    | 326919555 | XP_00320604 | 0.02   | 0       | 43.17 | 1.01  | 5.19   | 0      | 36.42  | 35.52  | 27.01  | 0.01   | 2.79   | 0      |
| 1-2.c49476/1/1248  | increased sodium tolerance 1   | 147903060 | NP_00108665 | 13.32  | 11.14   | 0     | 0     | 0      | 0      | 2.64   | 2.58   | 6.2    | 30.62  | 60.76  | 0      |
| 2-3.c33454/2/2381  | tax1-binding protein 1-like B  | 820160924 | KKX21603.1  | 0      | 2.46    | 0     | 0     | 0      | 0      | 1.42   | 2.61   | 2.88   | 0      | 0.45   | 0      |
| 2-3.c39404/1/2181  | aquaporin 3-like [Hyla chrysc  | 86553029  | ABC98210.1  | 0      | 5.67    | 8.26  | 0     | 0.58   | 0      | 17.37  | 8.11   | 5.2    | 44.1   | 0      | 120.52 |
| 2-3.c12316/3/2702  | claudin-1 [Xenopus (Silurana   | 62751357  | NP_00101570 | 31.36  | 28.74   | 23.58 | 0     | 0      | 0      | 27.85  | 0      | 21.58  | 0      | 0      | 71.28  |
| 2-3.c13805/4/2578  | transcription factor Dp-1 [Xe  | 148222844 | NP_00108805 | 1.45   | 8.42    | 1.55  | 1.72  | 2.48   | 0.9    | 0      | 0      | 0      | 1.89   | 0      | 3.3    |
| 2-3.c60180/1/2529  | PREDICTED: pseudouridylyl      | 847109932 | XP_01281450 | 0      | 0.62    | 0.27  | 1.27  | 1.66   | 2.54   | 0      | 0      | 0      | 0      | 0.31   | 0.73   |
| 1-2.c45554/1/1861  | uncharacterized protein LOC    | 73853872  | NP_00102751 | 0      | 0       | 0     | 0     | 0      | 0.16   | 5.75   | 2.54   | 5.41   | 8.96   | 7.83   | 16.98  |
| 1-2.c29226/1/9331  | tyrosine 3-monooxygenase/tr    | 89515082  | ABD75373.1  | 11.8   | 0       | 4.37  | 8.84  | 5.22   | 3.94   | 0      | 0      | 0      | 0      | 36.83  | 16.88  |
| 1-2.c11691/1/1275  | PREDICTED: LOW QUALI           | 655894700 | XP_00272324 | 3.61   | 0       | 20.71 | 25.36 | 16.27  | 7.19   | 0      | 0      | 0.95   | 0.82   | 1.14   | 4.89   |
| 1-2.c16967/2/1621  | PREDICTED: pre-mRNA 3'-        | 847088056 | XP_01281945 | 51.3   | 0       | 26.99 | 25.83 | 22.25  | 16.14  | 3.37   | 0.41   | 0      | 19.99  | 17.96  | 24.12  |
| 1-2.c8009/1/1826   | PREDICTED: ATP-depender        | 641754248 | XP_00817708 | 0      | 29.5    | 10.32 | 0     | 0      | 0      | 3.65   | 6.1    | 1.18   | 0      | 0      | 3.85   |
| 2-3.c4869/1/2060   | scinderin [Xenopus laevis]>g   | 148236707 | NP_00108608 | 0      | 18.25   | 0     | 0.3   | 0      | 0.16   | 2.19   | 8.34   | 7.69   | 4.29   | 1.37   | 0      |
| 3-6.c4669/1/4636.2 | PREDICTED: myosin-4 [Xer       | 847156920 | XP_01282446 | 108.43 | 3.27    | 0     | 0     | 0      | 0.04   | 0      | 290.43 | 196.98 | 0      | 0      | 0      |
| 1-2.c48375/1/1497  | exocyst complex component      | 54020886  | NP_00100568 | 1.23   | 13.44   | 0.72  | 1.01  | 0.37   | 0.53   | 11.97  | 11.81  | 12.92  | 25.6   | 3.82   | 0.73   |
| 2-3.c4959/1/1894   | PREDICTED: RNA polymer         | 847153928 | XP_01282370 | 0      | 4.31    | 0     | 0     | 0      | 0      | 3.34   | 1.43   | 1.52   | 6.23   | 0.81   | 0      |
| 2-3.c43967/1/2629  | probable UDP-sugar transpor    | 156717564 | NP_00109632 | 1.66   | 0       | 1.63  | 1.51  | 2.5    | 0.69   | 0      | 0      | 0      | 0      | 0.52   | 2.51   |
| 1-2.c25949/1/1545  | nuclear factor interleukin-3-r | 62751891  | NP_00101571 | 3.41   | 0.77    | 0     | 0     | 0      | 0      | 10.8   | 5.69   | 1.26   | 2.42   | 2.12   | 1.13   |
| 2-3.c39269/3/2173  | --                             | --        | --          | 0      | 16.22   | 0     | 3.15  | 5.67   | 18.83  | 0      | 0      | 0      | 0      | 0      | 0      |
| 2-3.c39742/1/2119  | PREDICTED: myosin-4 [Xer       | 847156920 | XP_01282446 | 0      | 0       | 0     | 0     | 0      | 0      | 0      | 0      | 24.21  | 21.48  | 0      | 0      |
| 3-6.c15231/1/3518  | ubiquitin carboxyl-terminal h  | 187608155 | NP_00112016 | 4.93   | 6.1     | 0     | 0     | 0      | 0      | 3      | 2.57   | 0.24   | 1.18   | 2.71   | 1.8    |
| 1-2.c16622/1/5384  | DDBI- and CUL4-associated      | 45360843  | NP_989097.1 | 0      | 0       | 0     | 0.56  | 0      | 0      | 11.35  | 3.13   | 6.84   | 30.79  | 50.37  | 21.13  |
| 1-2.c15273/1/1831  | PREDICTED: glycophorin-C       | 719767613 | XP_01021810 | 0      | 8.71    | 0     | 0     | 0      | 0      | 3.32   | 2.29   | 3.95   | 0      | 0      | 0      |

|                                                  |                                 |           |             |       |        |         |       |       |        |       |         |         |       |        |        |
|--------------------------------------------------|---------------------------------|-----------|-------------|-------|--------|---------|-------|-------|--------|-------|---------|---------|-------|--------|--------|
| 2-3.c6790/1/2408                                 | sequestosome-1 [Xenopus (Si     | 56118722  | NP_00100785 | 23.4  | 2.99   | 0       | 0.77  | 0     | 2.45   | 31.98 | 19.31   | 9.51    | 31.72 | 11.51  | 1.89   |
| 2-3.e13532/1/2165                                | --                              | --        | --          | 2.44  | 6.15   | 1.74    | 0     | 0     | 0      | 0.82  | 1.43    | 2.86    | 0     | 1.62   | 0      |
| 1-2.e15002/7/1695                                | uncharacterized protein LOC:    | 73853872  | NP_00102751 | 0     | 0      | 0.1     | 0     | 0     | 0      | 2.07  | 7.07    | 2.79    | 6.02  | 0      | 9.97   |
| 2-3.c700/130/2508                                | succinate dehydrogenase [ubi    | 148237169 | NP_00108347 | 80.04 | 21.99  | 0       | 0     | 0     | 0.14   | 51.49 | 54.2    | 0.27    | 0     | 9.04   | 19.37  |
| 1-2.c30843/1/1681                                | PREDICTED: dehydrogenase        | 224051869 | XP_00220040 | 10.42 | 0      | 15.63   | 5.15  | 6.5   | 3.09   | 0     | 0       | 0       | 0     | 5.35   | 0      |
| 2-3.c1219/130/2348                               | inner-ear cytokeratin [Rana c:  | 6980088   | AAF34720.1  | 0.51  | 0      | 0       | 0     | 0     | 0      | 3.84  | 5.99    | 0.76    | 5.84  | 0      | 0      |
| 1-2.c34719/1/1705                                | PREDICTED: male-specific l      | 513163754 | XP_416839.2 | 1.07  | 10     | 2.6     | 3.08  | 1.91  | 2.19   | 0     | 0       | 0       | 0     | 0      | 0      |
| 1-2.c35453/1/1427                                | --                              | --        | --          | 10.78 | 11.74  | 5.43    | 0.07  | 0     | 1.32   | 8.02  | 13.2    | 7.02    | 0.56  | 13.8   | 12.3   |
| 1-2.e9778/5/1817                                 | PREDICTED: nebulin isoforn      | 847166508 | XP_01282661 | 4.88  | 10.19  | 0       | 0     | 0     | 0      | 18.73 | 22.54   | 0       | 0.27  | 0      | 0      |
| 2-3.c54975/1/2031                                | --                              | --        | --          | 2.73  | 2.76   | 2.94    | 2.06  | 1.88  | 2.38   | 0     | 0       | 0       | 3.91  | 5.05   | 0      |
| 1-2.c43474/1/1404                                | uncharacterized protein LOC:    | 148223946 | NP_00108465 | 2.68  | 0      | 0       | 0     | 0     | 0.9    | 5.46  | 5.63    | 10.62   | 22.59 | 36.16  | 11.21  |
| 2-3.c33273/1/1914                                | myosin, heavy chain 4, skelet   | 47575800  | NP_00100124 | 13.25 | 1.65   | 76.79   | 0     | 0     | 2.33   | 20.5  | 113.88  | 78.65   | 0     | 0      | 0      |
| 2-3.c59574/2/2234                                | --                              | --        | --          | 6.44  | 24.4   | 4.99    | 0     | 0.35  | 0      | 8.36  | 1.59    | 6.45    | 0     | 1.85   | 14.58  |
| 1-2.c49551/1/1243                                | actin-related protein 10 [Xenc  | 58332420  | NP_00101100 | 0     | 0.59   | 2.39    | 0     | 0     | 0      | 2.32  | 2.99    | 3.9     | 10.11 | 1.46   | 0      |
| 2-3.c35404/1/2568                                | PREDICTED: protein PRRC:        | 512859823 | XP_00294134 | 16.48 | 20.84  | 0       | 0     | 13.44 | 13.26  | 0     | 0       | 0       | 10.53 | 1.91   | 13.85  |
| 2-3.c63257/1/2048                                | collagen, type 1, alpha 2 prec  | 147898763 | NP_00108072 | 2.95  | 617.17 | 3.42    | 4.07  | 1.95  | 15.44  | 63.45 | 54.12   | 96.38   | 38.29 | 7.45   | 2.58   |
| 2-3.c49296/1/2507                                | PREDICTED: IQ and ubiquit       | 641752321 | XP_00817095 | 13.22 | 1.19   | 0.39    | 11.95 | 10.15 | 7.29   | 0.33  | 0.82    | 0.57    | 0.82  | 13.16  | 12.59  |
| 2-3.c13071/3/2427                                | methionine-R-sulfoxide reduc    | 261399890 | NP_00100497 | 4.1   | 0      | 1       | 0.99  | 0.9   | 3.11   | 0     | 0       | 0       | 0.46  | 0      | 0      |
| 1-2.c37339/2/1496                                | PREDICTED: tropomyosin b        | 617601237 | XP_00752287 | 0     | 139.27 | 32.07   | 0     | 0     | 0      | 31.91 | 0       | 40.79   | 124.6 | 0      | 147.29 |
| 1-2.c45650/1/1695                                | PREDICTED: myosin-4-like        | 847156931 | XP_01282446 | 1.23  | 0      | 1.56    | 0     | 0     | 0.03   | 4.25  | 1.61    | 1.7     | 0     | 0      | 2.32   |
| 1-2.c28402/1/1354                                | --                              | --        | --          | 0.87  | 0.11   | 0.16    | 0     | 0     | 0      | 0.81  | 3       | 4.36    | 4.02  | 0.01   | 0      |
| 2-3.c23229/2/2172                                | PREDICTED: protein FAM6         | 301615719 | XP_00293731 | 2.01  | 6.55   | 1.09    | 1.13  | 2.04  | 2.45   | 0     | 0       | 0       | 0     | 0      | 0      |
| 2-3.c47178/1/2228                                | --                              | --        | --          | 6.77  | 0.82   | 0       | 0     | 0     | 0.1    | 3.34  | 7.79    | 2.44    | 11.54 | 13.49  | 14.98  |
| 2-3.c46364/1/2139                                | PREDICTED: plakophilin-4 i      | 847164041 | XP_01282604 | 0.15  | 8.86   | 2.64    | 0     | 0     | 0      | 0.38  | 3.22    | 2.79    | 0.02  | 2.07   | 8.72   |
| 3-6.c6141/1/3008                                 | PREDICTED: nebulin-like is      | 617383919 | XP_00754735 | 0     | 0      | 52.07   | 0     | 0     | 0      | 0     | 20.73   | 13.97   | 0     | 0      | 0      |
| 2-3.c41598/1/2074                                | PREDICTED: uncharacterize       | 847139136 | XP_01282091 | 20.85 | 10.47  | 0       | 0.12  | 0.34  | 0.41   | 19.41 | 6.87    | 9.48    | 11.91 | 1.51   | 0.93   |
| 1-2.c23568/1/1373                                | PREDICTED: lupus La prote       | 591363494 | XP_00705665 | 0     | 11.04  | 3.96    | 1.11  | 2.92  | 6.72   | 0     | 0       | 0       | 3.05  | 0      | 3.14   |
| 2-3.c1306/80/1927                                | larval type 1 keratin [Rana cat | 134140868 | ABO61147.1  | 3.31  | 11.63  | 1155.19 | 2.95  | 0     | 1.25   | 3.77  | 1078.23 | 1031.32 | 86.63 | 0      | 103.7  |
| 3-6.c4097/1/3792                                 | mediator of RNA polymerase      | 148224252 | NP_00109072 | 0.41  | 0.06   | 0       | 0     | 0     | 0      | 0.44  | 0.82    | 1.27    | 0.66  | 1.31   | 0.78   |
| 1-2.c48729/1/1546                                | PREDICTED: eukaryotic trar      | 558148079 | XP_00612003 | 0     | 0      | 0       | 0     | 0     | 0      | 1.95  | 0.85    | 4.27    | 14.93 | 4.79   | 0      |
| 2-3.c61413/1/2273                                | --                              | --        | --          | 0     | 18.06  | 0       | 0     | 0     | 0      | 0     | 9.77    | 15.98   | 0     | 0      | 0      |
| 1-2.c37470/19/1514v-ral simian leukemia viral or |                                 | 156717550 | NP_00109631 | 5.38  | 12.02  | 0       | 0     | 0     | 0      | 3.26  | 3.12    | 0.42    | 0     | 20.66  | 6.72   |
| 2-3.c53678/1/2292                                | --                              | --        | --          | 4.78  | 6.8    | 3.17    | 0.19  | 0     | 0.14   | 1.26  | 5.37    | 5.55    | 0     | 2.23   | 0      |
| 2-3.c17331/6/2356                                | PREDICTED: protein FAM6         | 301615719 | XP_00293731 | 0     | 0      | 0       | 0     | 0     | 0      | 0.38  | 1.72    | 1.93    | 0     | 0      | 0.79   |
| 1-2.c31638/3/1403                                | PREDICTED: fumarate hydr        | 512842641 | XP_00293586 | 2.87  | 0      | 0.13    | 0.01  | 0     | 0      | 12.13 | 0.2     | 12.59   | 3.32  | 3.46   | 0      |
| 1-2.c44164/1/1639                                | PREDICTED: AMP deamina          | 513224977 | XP_00493506 | 6.48  | 0      | 0       | 0     | 0     | 0      | 14.79 | 0       | 12.88   | 0.74  | 0      | 0.93   |
| 2-3.c7513/1/1911.1                               | PREDICTED: uncharacterize       | 847139136 | XP_01282091 | 8.49  | 3.99   | 0       | 0.08  | 0     | 0.06   | 7.57  | 2.65    | 2.18    | 4.9   | 0.92   | 0.92   |
| 2-3.c14444/1/2610                                | LINE-1 reverse transcriptase    | 808857515 | KKF10076.1  | 5.43  | 3.08   | 0.02    | 0.11  | 0.03  | 0.13   | 5.08  | 2.05    | 1.69    | 2.49  | 1.49   | 0.48   |
| 3-6.c16909/7/3127                                | PREDICTED: cytochrome P:        | 512848263 | XP_00293785 | 0     | 0      | 0.51    | 0.6   | 0.72  | 2.16   | 0     | 0       | 0       | 0     | 0      | 0.78   |
| 2-3.c37840/15/2075                               | PREDICTED: integrin beta-li     | 512821557 | XP_00293713 | 0     | 19.57  | 2.3     | 7.32  | 5.24  | 32.67  | 0     | 0       | 0       | 0     | 0      | 0      |
| 2-3.c28118/1/2205                                | PREDICTED: UBAP1-MVB            | 301618738 | XP_00293876 | 0.08  | 1.49   | 0.5     | 0.18  | 0     | 0.07   | 2.38  | 2.75    | 3.85    | 3.56  | 4.75   | 0.26   |
| 1-2.c25777/1/1573                                | PREDICTED: nebulin isoforn      | 847166510 | XP_01282661 | 0     | 0      | 0       | 0.06  | 92.06 | 270.19 | 0     | 0       | 0       | 8.68  | 0      | 0      |
| 2-3.c6877/2/2237.1                               | methionine-R-sulfoxide reduc    | 261399890 | NP_00100497 | 1.08  | 0      | 9.14    | 2.28  | 4.15  | 2.17   | 0     | 0       | 0       | 0     | 0      | 0      |
| 2-3.c47163/1/2532                                | DNA replication licensing fac   | 148232250 | NP_00108146 | 0     | 0      | 0       | 0.5   | 1.31  | 2.68   | 0     | 0       | 0       | 0     | 0      | 0      |
| 1-2.c28549/1/1526                                | --                              | --        | --          | 0.16  | 17.71  | 0.06    | 0     | 0.08  | 0      | 36.1  | 9.18    | 8.01    | 67.28 | 49.37  | 0      |
| 2-3.c5912/1/2552.1                               | --                              | --        | --          | 0.22  | 6.67   | 0       | 0.08  | 0.04  | 0.05   | 3.49  | 2.48    | 1.59    | 0.21  | 2.69   | 0      |
| 2-3.c28437/1/2093                                | PREDICTED: probable 28S r       | 301624894 | XP_00294172 | 0     | 0      | 0       | 0     | 0     | 0      | 2.83  | 1.49    | 0.86    | 0.97  | 4.43   | 1.44   |
| 2-3.c55119/1/2100                                | PREDICTED: E3 ubiquitin-p       | 821472717 | XP_01240197 | 0.35  | 0      | 0       | 0     | 0     | 0      | 4.71  | 0.96    | 1.67    | 0.01  | 1.76   | 2.12   |
| 2-3.c16859/1/2341                                | Uncharacterized protein B04     | 677429359 | KFQ30293.1  | 14.29 | 4.87   | 3.48    | 2.74  | 0     | 4      | 31.81 | 18.5    | 16      | 3.01  | 9.56   | 7.23   |
| 1-2.c50019/1/1346                                | PREDICTED: hydroxymethy         | 591387351 | XP_00706805 | 0     | 0      | 0       | 4.61  | 6.17  | 0.67   | 0     | 0       | 0       | 0     | 0      | 0      |
| 2-3.c40246/2/1975                                | PREDICTED: protein-L-isoa       | 395506555 | XP_00375755 | 0     | 1.5    | 2.88    | 0     | 0     | 0      | 2.28  | 2.09    | 0.27    | 0.69  | 0      | 0      |
| 2-3.c26644/1/2488                                | LINE-1 reverse transcriptase    | 808857515 | KKF10076.1  | 17.67 | 7.94   | 0       | 0.14  | 0     | 0      | 13.47 | 5.99    | 5       | 4.67  | 0.52   | 0.38   |
| 2-3.c16875/2/2353                                | fragile X mental retardation s  | 147899444 | NP_00108178 | 0     | 0      | 0       | 2.27  | 0.72  | 1.28   | 0     | 0       | 0       | 0     | 0      | 0      |
| 2-3.c16025/1/1745                                | PREDICTED: heat shock cog       | 512854037 | XP_00293757 | 0     | 0      | 0       | 0     | 0     | 0      | 79.21 | 0       | 36.46   | 261.1 | 456.45 | 454.7  |
| 1-2.c9795/1/1741                                 | PREDICTED: guanine nucleot      | 395821567 | XP_00378410 | 2.83  | 7.27   | 1.72    | 0.35  | 2.41  | 3.57   | 0     | 0       | 0       | 0     | 0      | 0      |
| 2-3.c19155/1/2496                                | --                              | --        | --          | 0     | 0      | 7.99    | 0     | 0     | 0      | 0     | 11.06   | 8.3     | 7.38  | 0      | 0      |
| 1-2.c28213/2/1626                                | --                              | --        | --          | 10.73 | 7.18   | 8.14    | 0     | 0     | 0      | 12.14 | 0.16    | 9       | 0     | 0      | 33.34  |
| 2-3.c48994/1/2294                                | --                              | --        | --          | 0     | 0      | 0       | 0     | 0     | 0      | 1.45  | 1.69    | 0.72    | 1.21  | 0.91   | 0      |

|                   |                                  |           |             |        |       |        |       |       |       |        |        |        |        |        |        |      |
|-------------------|----------------------------------|-----------|-------------|--------|-------|--------|-------|-------|-------|--------|--------|--------|--------|--------|--------|------|
| 2-3.c31996/3/2057 | PREDICTED: basic salivary        | 694948810 | XP_00942313 | 1.37   | 0     | 0      | 2.04  | 1.83  | 1.26  | 0      | 0      | 0      | 0      | 0      | 0      | 4.17 |
| 2-3.c4883/1/2005  | --                               | --        | --          | 0      | 0     | 0      | 0     | 0     | 0     | 7.3    | 6.25   | 0      | 0      | 18.82  | 0      |      |
| 2-3.c40145/1/2199 | cellular retinoic acid-binding   | 25453404  | NP_058940.1 | 6.37   | 2.09  | 0.28   | 3.49  | 3.77  | 8.48  | 0.75   | 0.03   | 0      | 1.1    | 0      | 24.01  |      |
| 2-3.c51969/2/2233 | succinate dehydrogenase [ubi     | 148237169 | NP_00108347 | 0      | 13.27 | 0      | 0     | 0     | 0     | 22.3   | 10.9   | 0      | 0      | 0      | 0      |      |
| 2-3.e10298/4/2109 | PREDICTED: NADH-ubiqui           | 697482752 | XP_00967305 | 0      | 0     | 0      | 0     | 0     | 0     | 7.75   | 0      | 6.79   | 8.05   | 0      | 0      |      |
| 1-2.e9072/3/1269  | PREDICTED: serine/threomir       | 768407032 | XP_01159967 | 5.24   | 0.02  | 0      | 0     | 0     | 5.24  | 29.8   | 12.82  | 14.35  | 98.75  | 144.78 | 64     |      |
| 1-2.c29157/1/1469 | PREDICTED: triadin isoform       | 847130849 | XP_01281908 | 0      | 1.79  | 0.26   | 1.02  | 0     | 0     | 158.59 | 137.67 | 0      | 85.29  | 0      | 0.6    |      |
| 2-3.c39293/1/2614 | WD repeat-containing proteir     | 147901327 | NP_00109144 | 0      | 1.14  | 0      | 0     | 0     | 0     | 0.7    | 0.66   | 2.49   | 0      | 0.22   | 0      |      |
| 2-3.c40566/1/2374 | --                               | --        | --          | 0.33   | 0     | 0.58   | 0     | 0     | 0     | 0.74   | 2.1    | 0.73   | 0      | 1.17   | 0.03   |      |
| 2-3.c32217/1/2449 | kelch-like protein 40 [Xenopi    | 147902760 | NP_00109046 | 0      | 0     | 0      | 0     | 0     | 0     | 1.31   | 0.33   | 2.03   | 3.43   | 0      | 0      |      |
| 2-3.c59310/1/2520 | --                               | --        | --          | 6.68   | 1.47  | 0.27   | 0     | 0     | 0.19  | 1.04   | 4.94   | 3.46   | 5.36   | 0.24   | 2.82   |      |
| 1-2.e14614/4/1333 | eukaryotic translation initiati  | 148235981 | NP_00108766 | 0      | 0     | 0.62   | 0     | 0     | 0     | 10.49  | 9.42   | 0      | 19.07  | 33.14  | 18.18  |      |
| 2-3.c44046/5/2067 | transcription factor jun-B [Xe   | 113205822 | NP_00103795 | 0      | 0     | 0      | 0     | 0     | 0     | 7.07   | 0      | 9.3    | 0      | 0      | 0      |      |
| 2-3.c36189/1/4603 | PREDICTED: myosin-4 [Xer         | 847156920 | XP_01282446 | 759.56 | 0     | 0      | 0     | 0     | 6.74  | 0      | 1071.9 | 904.71 | 0      | 0      | 0      |      |
| 2-3.c45487/1/2394 | --                               | --        | --          | 3.04   | 1.69  | 3.14   | 3.81  | 4.85  | 7.64  | 0.29   | 0.39   | 0.18   | 1.05   | 1.29   | 22.06  |      |
| 2-3.c28113/4/2290 | PREDICTED: NADH-ubiqui           | 641774292 | XP_00817072 | 0      | 8.58  | 0      | 0.02  | 18.86 | 12.46 | 0      | 0      | 0      | 1.54   | 0      | 0      |      |
| 1-2.e11354/2/1921 | PREDICTED: nebulin isofor        | 847166510 | XP_01282661 | 0      | 0     | 0      | 0.56  | 91.29 | 80.93 | 0      | 0.42   | 0      | 0      | 0      | 0      |      |
| 2-3.c13577/1/2627 | PREDICTED: ATP-depende           | 512849013 | XP_00293318 | 1.01   | 1.81  | 0      | 0     | 0     | 0     | 2.2    | 1.19   | 0.27   | 0      | 0.92   | 0      |      |
| 3-6.c10600/1/3071 | PREDICTED: probable ATP-         | 556977386 | XP_00599596 | 0.72   | 3.44  | 0      | 0     | 0.06  | 0     | 2.37   | 2.08   | 0.34   | 0      | 0      | 1.27   |      |
| 1-2.e10771/3/1362 | Myozenin-1-like [Xenopus la      | 148237556 | NP_00107945 | 1.78   | 3.58  | 881.18 | 1.67  | 0.78  | 1.89  | 551.9  | 0.5    | 674.72 | 82.41  | 0      | 0      |      |
| 1-2.e27356/3/1487 | PREDICTED: eukaryotic init       | 847126504 | XP_01281807 | 55.75  | 23.11 | 44.57  | 0     | 0     | 0     | 15.87  | 0      | 28.54  | 0      | 0      | 7.69   |      |
| 1-2.c38885/1/1256 | --                               | --        | --          | 14.98  | 9.8   | 0      | 0     | 1.33  | 4.1   | 21.98  | 14.47  | 21.84  | 87.81  | 112.26 | 26.23  |      |
| 2-3.c36023/1/1917 | --                               | --        | --          | 3.8    | 22.93 | 0      | 0     | 0     | 0     | 32.49  | 8.31   | 3.68   | 8.11   | 13.05  | 7.25   |      |
| 2-3.c55318/1/2062 | --                               | --        | --          | 11.9   | 0.74  | 0      | 0     | 0     | 0     | 9.77   | 9.63   | 0      | 12.84  | 14.04  | 19.65  |      |
| 1-2.c45548/1/1384 | trimeric intracellular cation cl | 148237167 | NP_00107953 | 0      | 6.36  | 26.77  | 0     | 14.69 | 13.22 | 0      | 0      | 0      | 0      | 0      | 0      |      |
| 1-2.c29870/1/1679 | larval type I keratin [Rana cat  | 134140868 | ABO61147.1  | 0.36   | 4.1   | 428.62 | 1.32  | 0.97  | 0.84  | 1.59   | 510.38 | 433.88 | 59.51  | 9.46   | 78.45  |      |
| 2-3.c55263/1/2348 | RAB21, member RAS oncog          | 148230174 | NP_00108340 | 0.34   | 6.99  | 0      | 0     | 0     | 0     | 4.26   | 6.04   | 8.12   | 3.59   | 0      | 0      |      |
| 2-3.c27951/1/2210 | --                               | --        | --          | 12.54  | 4.37  | 24.98  | 0     | 0     | 0     | 22.53  | 1.25   | 17.4   | 0      | 0.75   | 2.88   |      |
| 1-2.e11045/2/1314 | PREDICTED: ATP-binding c         | 512859677 | XP_00293951 | 0      | 0     | 3.07   | 0.26  | 0     | 0     | 16.01  | 4.89   | 4.45   | 0      | 0      | 0      |      |
| 1-2.e11892/2/1245 | annexin A5 [Rana catesbeian      | 148726782 | BAF63788.1  | 9.01   | 19.98 | 2.69   | 0     | 0     | 0     | 11.31  | 0      | 15.52  | 20.87  | 12.95  | 23.48  |      |
| 2-3.c8960/1/2111  | --                               | --        | --          | 0      | 4.79  | 0      | 0     | 0.01  | 0     | 2.87   | 0.15   | 2.54   | 6.95   | 3.99   | 4.02   |      |
| 3-6.e13001/2/2963 | PREDICTED: DNA-binding           | 620966761 | XP_00765655 | 0      | 0     | 5.06   | 0     | 0     | 0     | 5.06   | 0      | 8.21   | 23.28  | 20.39  | 13.25  |      |
| 1-2.e47622/2/1291 | polyubiquitin-C [Cricetulus g    | 346986300 | NP_00123130 | 160.6  | 0     | 0      | 12.21 | 13.32 | 27.74 | 172.69 | 163.51 | 80.54  | 200.17 | 642.94 | 407.35 |      |
| 2-3.c3380/2/2450  | PMCA1bx [Rana catesbeiana        | 12963455  | AAK11272.1  | 0      | 0.65  | 0      | 0     | 0     | 0     | 4.64   | 3.66   | 0      | 7.55   | 8.15   | 14.5   |      |
| 2-3.c37579/2/1993 | protein phosphatase 3, catalyt   | 148235473 | NP_00108737 | 0      | 0.16  | 0      | 0.56  | 1.84  | 2.57  | 0      | 0      | 0      | 0.9    | 0      | 1.61   |      |
| 1-2.c20088/1/1464 | PREDICTED: probable 28S r        | 301608151 | XP_00293365 | 4.03   | 5.72  | 1.95   | 0     | 0.01  | 0     | 7.38   | 1.48   | 2.33   | 0      | 2.71   | 2.7    |      |
| 1-2.c25274/2/1318 | PREDICTED: dehydrogenasi         | 224051869 | XP_00220040 | 26.92  | 1.05  | 23.22  | 18.96 | 14.48 | 7.77  | 0.92   | 1.14   | 0.86   | 13.76  | 32.49  | 22.62  |      |
| 1-2.e15648/1/1568 | poly(rC) binding protein 3 [X    | 148226696 | NP_00108012 | 0      | 0     | 0      | 10.54 | 0     | 9.76  | 0      | 0      | 0      | 0      | 60.16  | 0      |      |
| 1-2.c35081/1/1692 | oxidative-stress responsive 1    | 148228567 | NP_00108693 | 0      | 0     | 0      | 0     | 0     | 0     | 2.38   | 2.21   | 0.43   | 0      | 0.38   | 3.73   |      |
| 1-2.c45603/1/1340 | alpha1 type II collagen [Cync    | 5360532   | BAA82043.1  | 1.76   | 0     | 4.1    | 3.13  | 3.07  | 0.09  | 24.29  | 19.15  | 23.06  | 10.06  | 9.6    | 0      |      |
| 2-3.c38650/3/2725 | stromal interaction molecule     | 45433580  | NP_991397.1 | 0      | 20.25 | 2.35   | 3.16  | 0.06  | 4.06  | 0      | 0      | 0      | 0      | 0      | 17.52  |      |
| 2-3.c46251/1/2268 | --                               | --        | --          | 13.68  | 1.25  | 0      | 0     | 3.04  | 0.96  | 29.78  | 21.77  | 17.48  | 130.74 | 221.7  | 21.94  |      |
| 1-2.c41479/1/1217 | --                               | --        | --          | 0      | 0     | 0      | 0     | 0     | 0     | 20.61  | 0      | 13.28  | 422.26 | 813.44 | 292.56 |      |
| 1-2.e11980/1/1891 | --                               | --        | --          | 0      | 15.89 | 3.74   | 0     | 5.87  | 7.43  | 0      | 0      | 0      | 8.08   | 4.61   | 0      |      |
| 2-3.c48941/1/2702 | PREDICTED: Krueppel-like         | 512821706 | XP_00293197 | 0      | 2.25  | 0      | 0     | 0     | 0     | 4.44   | 3.15   | 0      | 0.17   | 0      | 17.77  |      |
| 2-3.c48088/1/2524 | ovarian fibroin-like substance   | 10954052  | AAG25718.1  | 0      | 2.65  | 0.69   | 0     | 0     | 0     | 1      | 0.73   | 1.49   | 0.08   | 0      | 0.68   |      |
| 1-2.c43575/1/1340 | PREDICTED: TATA-binding          | 823470855 | XP_01242417 | 2.47   | 0     | 0      | 1.08  | 0     | 10.75 | 3.42   | 6.88   | 4.55   | 14.62  | 8.49   | 0      |      |
| 1-2.e2265/25/1452 | MGC80266 protein [Xenopus        | 147904447 | NP_00108550 | 32.86  | 33.95 | 0      | 0     | 0     | 0.09  | 33.55  | 19.72  | 0      | 0.14   | 75.7   | 55.52  |      |
| 2-3.c47427/1/1986 | PREDICTED: homeobox pro          | 847152597 | XP_01282325 | 0      | 1.13  | 0.11   | 0     | 0     | 0     | 1.18   | 2.17   | 0.53   | 0.7    | 0      | 0      |      |
| 1-2.c43972/1/1382 | cystathionine gamma-lyase [?     | 148238287 | NP_00108798 | 3.59   | 0     | 14.3   | 21.86 | 12.23 | 3.54  | 0      | 0.2    | 0.15   | 0      | 0      | 0      |      |
| 2-3.c37251/1/2448 | --                               | --        | --          | 1      | 2.82  | 1.33   | 0.75  | 0.98  | 2.13  | 0      | 0      | 0      | 0      | 0      | 3.08   |      |
| 2-3.c55244/1/2548 | 4-aminobutyrate aminotransf      | 189230071 | NP_00112152 | 3.39   | 0     | 1.71   | 2.3   | 1.81  | 0.18  | 0      | 0      | 0      | 1.23   | 0      | 0.6    |      |
| 2-3.e17277/1/2466 | CD99 [Xenopus laevis]            | 213626008 | AAI69812.1  | 2.12   | 0     | 0      | 0     | 0     | 0     | 1      | 1.51   | 1.03   | 0      | 0      | 4.45   |      |
| 1-2.c38547/2/1333 | PREDICTED: kinectin isofor       | 847152938 | XP_01282336 | 0      | 0     | 0      | 0     | 0     | 0     | 0      | 5.92   | 7.32   | 0      | 0      | 0      |      |
| 3-6.c14965/1/3295 | glucosidase, alpha; neutral A1   | 148232724 | NP_00109123 | 0      | 11.08 | 2.52   | 4.23  | 5.99  | 1.95  | 0      | 0.25   | 0.56   | 1.83   | 0      | 0.69   |      |
| 2-3.c5196/1/2126  | PREDICTED: cordon-bleu pt        | 847166697 | XP_01282666 | 0.51   | 1.8   | 0.54   | 0     | 0     | 0.45  | 1.95   | 1.17   | 0      | 0.42   | 0      | 0      |      |
| 2-3.c62557/2/2324 | PREDICTED: eukaryotic pep        | 560964464 | XP_00620464 | 5.42   | 5.08  | 0      | 0     | 5.54  | 9.91  | 0      | 0      | 0      | 0      | 0      | 1.52   |      |
| 2-3.c1567/35/2478 | PREDICTED: myosin-4-like         | 847156931 | XP_01282446 | 60.32  | 0     | 0      | 0     | 0     | 1.03  | 0      | 279.25 | 178.47 | 0      | 0      | 37.7   |      |

|                    |                                 |           |             |        |        |        |        |        |        |        |        |        |          |          |          |
|--------------------|---------------------------------|-----------|-------------|--------|--------|--------|--------|--------|--------|--------|--------|--------|----------|----------|----------|
| 2-3.c60993/1/2206  | PREDICTED: matrin-3-like i      | 525012774 | XP_00505395 | 3.94   | 9.65   | 0.14   | 0      | 4.73   | 5.09   | 0      | 0      | 0      | 0        | 0        | 5.2      |
| 1-2.e19344/1/1741  | --                              | --        | --          | 0      | 2.81   | 0      | 0.08   | 0      | 0      | 1.07   | 3.18   | 1.74   | 12.55    | 9.45     | 0        |
| 1-2.c39465/1/1514  | --                              | --        | --          | 8.53   | 0      | 0      | 0      | 0      | 0      | 12.35  | 6.96   | 0      | 20.66    | 24.89    | 19.34    |
| 2-3.c43312/2/2496  | glutamate dehydrogenase 1, r    | 58331978  | NP_00101113 | 0      | 9.02   | 25.69  | 15.94  | 0.32   | 8.81   | 0      | 0      | 0      | 0        | 0        | 0        |
| 3-6.e15641/1/10736 | --                              | --        | --          | 0      | 0      | 4.22   | 0      | 0.46   | 0      | 6.16   | 4.78   | 1.79   | 0.55     | 2        | 0        |
| 1-2.e28168/1/1493  | --                              | --        | --          | 0      | 0      | 0      | 0.21   | 0.19   | 0      | 4.63   | 2.78   | 4.34   | 19.33    | 38.21    | 0.44     |
| 2-3.c61026/1/2382  | PREDICTED: adseverin [Xei       | 301619350 | XP_00293905 | 8.04   | 0      | 8.6    | 2.22   | 7.63   | 4.48   | 0.68   | 0      | 0      | 0        | 0        | 6.71     |
| 2-3.e14714/1/1906  | DEK oncogene [Xenopus lae       | 291290881 | NP_00116747 | 4.32   | 0      | 0      | 0      | 4.8    | 6.68   | 0      | 0      | 0      | 1.1      | 1.34     | 0        |
| 1-2.c25466/1/1423  | basic leucine zipper and W2 c   | 147906588 | NP_00108025 | 0      | 59.94  | 0      | 0      | 8.94   | 16.42  | 0      | 0      | 0      | 35.79    | 0        | 0        |
| 1-2.c35534/1/2703  | --                              | --        | --          | 3.12   | 2.29   | 0      | 0      | 0      | 0      | 6.3    | 0.9    | 4.05   | 22.11    | 28.72    | 8.86     |
| 2-3.e41598/1/2074  | endonuclease/reverse transcri   | 148645276 | ABR01162.1  | 17.33  | 5.6    | 0      | 0      | 0      | 0      | 17.51  | 5.32   | 4.21   | 4.07     | 0        | 0.36     |
| 1-2.c35568/2/1345  | S-adenosylmethionine syntha     | 45361639  | NP_989395.1 | 0.81   | 0      | 0      | 5.01   | 0      | 0      | 46.57  | 13.27  | 22.79  | 20.79    | 32.34    | 0        |
| 1-2.c27027/1/1874  | glutamate dehydrogenase 1, r    | 58331978  | NP_00101113 | 0      | 0      | 0      | 0      | 0      | 0      | 4.26   | 4.61   | 0      | 0        | 3.85     | 0        |
| 2-3.e22611/1/2344  | --                              | --        | --          | 35.28  | 10.54  | 1.24   | 1.78   | 1.69   | 0      | 8.15   | 21.89  | 13.96  | 32.25    | 1.48     | 24.28    |
| 1-2.e24095/1/6125  | isocitrate dehydrogenase 2 (N   | 148227256 | NP_00108032 | 45.8   | 3.66   | 44.97  | 37.83  | 49.35  | 30.19  | 0      | 0      | 8      | 0        | 0        | 0        |
| 1-2.c46860/1/1190  | --                              | --        | --          | 12.33  | 29.67  | 0.71   | 0      | 0      | 0      | 6.93   | 7.01   | 0      | 38.22    | 67.53    | 37.23    |
| 1-2.e19271/1/1510  | PREDICTED: NACHT, LRR           | 699666029 | XP_00988355 | 17.78  | 2.67   | 0.95   | 0.82   | 0.89   | 2.03   | 17.51  | 8.44   | 11.86  | 20.28    | 25.75    | 32.06    |
| 2-3.e27778/1/1918  | nuclear factor, erythroid 2-lik | 147900041 | NP_00108001 | 1.49   | 0      | 0      | 0      | 0      | 0      | 13.08  | 6.02   | 0.1    | 13.74    | 9.63     | 31.8     |
| 2-3.e29051/1/2312  | --                              | --        | --          | 1.93   | 0      | 0      | 0      | 0      | 0      | 3.92   | 2.64   | 2.19   | 21.56    | 12.51    | 28.87    |
| 2-3.e5455/9/2421   | PREDICTED: protein FAM6         | 301615719 | XP_00293731 | 4.6    | 7.2    | 2.96   | 3.03   | 3.88   | 2.47   | 0      | 0.29   | 0.12   | 6.29     | 7.59     | 0        |
| 1-2.e19662/3/1297  | --                              | --        | --          | 4.34   | 0      | 0      | 0.63   | 0      | 0      | 10.46  | 1.46   | 9.02   | 13.17    | 26.67    | 0.19     |
| 3-6.e17786/15/3106 | PREDICTED: alpha-actinin-       | 602667068 | XP_00743910 | 142.97 | 12.66  | 388.36 | 278.54 | 208.79 | 404.92 | 44.6   | 108.89 | 135.4  | 0        | 0        | 0        |
| 2-3.c42464/1/7638  | PREDICTED: LOW QUALI            | 700363815 | XP_00992652 | 684.81 | 0      | 548.35 | 629.31 | 553.97 | 261.4  | 575.77 | 418.7  | 0      | 0        | 0        | 0        |
| 1-2.c48431/1/1352  | PREDICTED: olfactodin           | 847154698 | XP_01282391 | 0      | 0      | 0      | 0      | 0      | 0      | 0.17   | 0      | 0      | 659.08   | 442.44   | 988.28   |
| 1-2.c3369/2/1167   | --                              | --        | --          | 0      | 0.86   | 0      | 0      | 0      | 0      | 267.03 | 0      | 46.65  | 445.11   | 652.17   | 1288.28  |
| 1-2.e15452/2/1533  | matrix metalloproteinase-9TF    | 147901642 | NP_00109130 | 1.38   | 0      | 0      | 0      | 0.3    | 0      | 6.38   | 0.62   | 0      | 772.11   | 604.96   | 1159.04  |
| 1-2.e21064/8/1952  | solute carrier family 37 (gluc  | 147901932 | NP_00108340 | 19.59  | 3.1    | 103.33 | 80.29  | 76.82  | 124.98 | 41.26  | 46.55  | 105.76 | 0        | 0        | 0        |
| 2-3.c42102/1/2100  | LOC398634 protein, partial [    | 32450475  | AAH53779.1  | 0      | 2.62   | 0      | 0      | 0      | 0      | 0      | 0      | 0      | 130.95   | 109.33   | 75.66    |
| 1-2.e52436/7/1287  | PREDICTED: ATP synthase         | 557324504 | XP_00603528 | 0      | 0      | 0      | 0      | 0      | 0      | 113.67 | 0      | 0      | 126.78   | 244.06   | 158.14   |
| 1-2.e42638/3/1834  | polyadenylate-binding protein   | 52346016  | NP_00100505 | 92.9   | 165.26 | 64.37  | 71.14  | 50.64  | 27.27  | 35.69  | 49.57  | 28.26  | 0        | 0        | 0        |
| 1-2.e28637/1/2058  | LOC494693 protein [Xenopus      | 52138935  | AAH82684.1  | 4.77   | 0.74   | 0.33   | 2.42   | 0.02   | 0.07   | 2.79   | 0.57   | 0      | 2292.79  | 1806.27  | 1241.13  |
| 1-2.e35595/2/1825  | F-actin-capping protein subu    | 161086978 | NP_00110305 | 0.21   | 34.24  | 37.47  | 21.21  | 33.38  | 51     | 0.36   | 20.33  | 0      | 0        | 0        | 0        |
| 2-3.e42736/1/2384  | Apolipoprotein A-I-like prec    | 148227056 | NP_00107935 | 1.88   | 3.75   | 1.17   | 25.9   | 47.54  | 8.54   | 37.8   | 20.98  | 19.07  | 24705.84 | 42592.67 | 45497.04 |
| 1-2.c38617/1/1705  | matrix metalloproteinase-9TF    | 147901642 | NP_00109130 | 14.55  | 5.09   | 2.86   | 16.84  | 2.58   | 3.87   | 59.27  | 22.11  | 12.17  | 10239.52 | 10289.61 | 7741.04  |
| 1-2.e3235/1/1394.2 | --                              | --        | --          | 35.89  | 0      | 1.74   | 20.77  | 4.22   | 0      | 33.93  | 2.91   | 2.06   | 12189.75 | 9318.57  | 7750.28  |
| 3-6.e8004/1/2790.1 | PREDICTED: ethanolamine-        | 641767307 | XP_00816835 | 0.67   | 0.92   | 1.37   | 0      | 0      | 0      | 10.24  | 1.32   | 0      | 201.64   | 181.22   | 96.13    |
| 1-2.c12894/1/1436  | apolipoprotein A4 precursor [   | 148222300 | NP_00108800 | 4.88   | 1.61   | 0.2    | 0      | 1.26   | 0.12   | 1.58   | 0.59   | 1.54   | 535.26   | 642.07   | 612.71   |
| 1-2.e3650/4/1363   | PREDICTED: trifunctional e      | 847164769 | XP_01282620 | 0      | 0      | 0      | 0      | 0      | 0      | 2.33   | 0      | 0      | 119.19   | 227.49   | 92.49    |
| 2-3.c1304/108/2008 | PREDICTED: protein transp       | 734599634 | XP_01075368 | 31.87  | 66.51  | 35.95  | 18.07  | 23.39  | 25.5   | 6.86   | 5.86   | 3.2    | 0        | 0        | 0        |
| 1-2.c33717/1/8520  | matrix metalloproteinase-9TF    | 147901642 | NP_00109130 | 6.58   | 0      | 0.77   | 2.44   | 2.76   | 2.54   | 17.62  | 2.74   | 0      | 2525.98  | 2184.25  | 2334.95  |
| 1-2.e51791/13/1641 | PREDICTED: heat shock pro       | 795388413 | XP_01175268 | 0      | 0      | 0      | 0      | 0      | 0      | 0      | 0      | 0      | 196.94   | 51.27    | 160      |
| 1-2.e1527/106/1395 | apolipoprotein A4 precursor [   | 148222300 | NP_00108800 | 2.79   | 0      | 0      | 2.39   | 0      | 0      | 1.28   | 0.5    | 0      | 647.65   | 616.62   | 853.61   |
| 2-3.c63465/6/2077  | ATPase, Na+/K+ transportin      | 148229987 | NP_00108258 | 20.89  | 30.91  | 15.78  | 19.73  | 23.69  | 12.74  | 0      | 0      | 28.07  | 0        | 0        | 0        |
| 1-2.e43857/1/1238  | V-type proton ATPase 16 kD      | 60678280  | NP_991117.1 | 0      | 0      | 0      | 0      | 0      | 0      | 0      | 0      | 0      | 77.98    | 67.69    | 73.97    |
| 1-2.e44872/1/1337  | PREDICTED: tropomyosin b        | 505767831 | XP_00460027 | 0      | 0      | 0      | 0      | 0      | 0      | 0      | 0      | 2.46   | 144.31   | 117.85   | 80.32    |
| 1-2.c31902/2/1174  | PREDICTED: tropomyosin a        | 847143254 | XP_01282187 | 0      | 0      | 0      | 0      | 0      | 0      | 0      | 0      | 0      | 81.14    | 65.4     | 55.75    |
| 2-3.e5808/1/7973.1 | matrix metalloproteinase-9TF    | 147901642 | NP_00109130 | 5.95   | 1.3    | 0      | 2      | 1.3    | 0.44   | 8.74   | 3.35   | 2.62   | 847.41   | 640.81   | 1356.5   |
| 1-2.e10670/9/1416  | obg-like ATPase 1 [Xenopus      | 148228515 | NP_00107968 | 21.54  | 18.89  | 55.39  | 30.6   | 17.55  | 28.29  | 34.76  | 27.41  | 0      | 0        | 0        | 0        |
| 1-2.c43622/1/1269  | --                              | --        | --          | 0      | 0      | 0      | 0      | 0      | 0      | 9.84   | 0      | 0      | 68.93    | 83.9     | 28.43    |
| 1-2.e11543/1/1301  | NADH dehydrogenase 1 alph       | 226371850 | ACOS1550.1  | 29.41  | 10.04  | 17.19  | 27.31  | 45.06  | 28.12  | 0      | 15.1   | 27.61  | 0        | 0        | 0        |
| 2-3.e29390/1/2341  | Mmp-9th protein [Xenopus lae    | 124504280 | AAI28677.1  | 3.34   | 0.28   | 0.1    | 2.85   | 0.32   | 0.31   | 6.68   | 3.54   | 3.1    | 599.63   | 489.56   | 949.35   |
| 2-3.c15571/2/2133  | --                              | --        | --          | 0      | 4.04   | 0      | 0      | 0      | 0      | 11.92  | 0      | 0      | 32.27    | 18.2     | 35.39    |
| 1-2.e12164/1/1434  | PREDICTED: isocitrate dehy      | 831547357 | XP_01272691 | 210.39 | 76.36  | 163.13 | 129.79 | 77.43  | 39.06  | 0.01   | 75.1   | 0.17   | 0        | 0        | 0        |
| 1-2.c38469/1/6160  | PREDICTED: telethonin [Xe       | 301622194 | XP_00294041 | 62.92  | 51.94  | 83.02  | 36.67  | 66.33  | 53.49  | 13.35  | 47.65  | 34.95  | 0        | 0        | 0        |
| 1-2.c39401/1/1023  | Apolipoprotein A-I-like prec    | 148227056 | NP_00107935 | 82.55  | 5.49   | 1.06   | 45.88  | 5.45   | 1.61   | 49.08  | 6.99   | 7.92   | 7385.49  | 7255.37  | 11197.63 |
| 3-6.e15224/1/3466  | TCDD-inducible poly [ADP-       | 163914785 | NP_00110641 | 0      | 0      | 0      | 0      | 0      | 0      | 0.32   | 3.68   | 0      | 106.85   | 86.51    | 33.54    |
| 2-3.e11181/294/202 | PREDICTED: telethonin [Xe       | 301622194 | XP_00294041 | 93.06  | 51.43  | 94.03  | 33.28  | 94.01  | 110.27 | 24.77  | 47.91  | 26.15  | 0        | 1.09     | 0.36     |
| 1-2.c40985/1/1439  | actin, alpha cardiac muscle 2   | 45361557  | NP_989355.1 | 27.18  | 7.1    | 38.76  | 12.58  | 20.85  | 28.44  | 4.34   | 40.31  | 2.32   | 0        | 0        | 0        |

|                    |                                  |           |             |        |         |        |        |        |        |        |        |        |        |        |        |
|--------------------|----------------------------------|-----------|-------------|--------|---------|--------|--------|--------|--------|--------|--------|--------|--------|--------|--------|
| 2-3.c9812/1/2365   | --                               | --        | --          | 2.8    | 82.43   | 7.53   | 8.32   | 9.82   | 23.28  | 4.03   | 3.76   | 5.2    | 0      | 0      | 0      |
| 1-2.e14294/4/1468  | LOC445827 protein, partial [     | 49899736  | AAH76748.1  | 0      | 0       | 0      | 0      | 0      | 0      | 0      | 0      | 0      | 39.23  | 48.92  | 24.52  |
| 1-2.e42964/2/1354  | keratin 8 [Rana catesbeiana]     | 15341208  | BAB63946.1  | 0      | 0       | 0      | 0      | 0      | 0      | 0      | 0      | 6.62   | 294.93 | 416.48 | 98.7   |
| 1-2.c38190/1/1834  | --                               | --        | --          | 0      | 0       | 0      | 0      | 0      | 0      | 0      | 0      | 0      | 27.26  | 37.93  | 19.65  |
| 3-6.c4316/4/2803   | RecName: Full=Casein kinas       | 20141531  | P28020.2    | 13.36  | 23.62   | 2.46   | 5.47   | 19.12  | 13.92  | 7.9    | 9.63   | 3.02   | 0      | 0      | 0      |
| 1-2.c33102/1/1245  | ubiquinol-cytochrome c reduct    | 147902934 | NP_00107971 | 0      | 0       | 0      | 0      | 0      | 0      | 0      | 0      | 0      | 53.92  | 43.44  | 31.87  |
| 1-2.c4247/1/1347.1 | NADH dehydrogenase [ubiqui       | 58332714  | NP_00101143 | 60.23  | 16.51   | 64.19  | 33.32  | 48.3   | 16.07  | 10.64  | 22.46  | 0      | 0      | 0      | 0      |
| 3-6.c3079/4/2849   | PREDICTED: DDB1- and CI          | 847088170 | XP_01281968 | 2.08   | 3.12    | 8.42   | 7.97   | 9.49   | 4.87   | 5.14   | 4.25   | 5.78   | 0      | 0      | 0      |
| 1-2.c39832/1/1457  | 2-oxoglutarate dehydrogenas      | 71897293  | NP_00102655 | 0      | 1.5     | 0      | 0      | 0      | 0      | 10.35  | 0      | 1.42   | 34.44  | 46.51  | 19.45  |
| 1-2.c42164/4/1511  | PREDICTED: LOW QUALI             | 641786874 | XP_00531376 | 15.12  | 36.35   | 18.22  | 9.24   | 27.33  | 31.52  | 7.76   | 0      | 5.33   | 0      | 0      | 0.14   |
| 3-6.e14709/1/3340  | PREDICTED: 5'-nucleotidase       | 530647152 | XP_00531015 | 1.32   | 3.92    | 3.02   | 2.64   | 6.97   | 10     | 4.98   | 4.9    | 6.21   | 0      | 0      | 0      |
| 3-6.e2822/9/3431   | PREDICTED: eukaryotic pep        | 560964464 | XP_00620464 | 0      | 0       | 0.25   | 3.72   | 5.01   | 9.82   | 7.28   | 2.66   | 0      | 0      | 0      | 0      |
| 1-2.c31922/8/1613  | periostin precursor [Xenopus     | 163915007 | NP_00110637 | 78.3   | 242.23  | 151.1  | 75.1   | 127.47 | 82.22  | 101.92 | 70.4   | 63.73  | 0      | 0      | 2.02   |
| 1-2.c35598/1/1274  | ribosomal protein, large, P0 [   | 147904649 | NP_00108013 | 627.66 | 1500.65 | 804.62 | 445.79 | 545.36 | 596.68 | 210.29 | 348.37 | 242.08 | 1      | 0      | 11.2   |
| 1-2.e44333/1/1325  | MAM domain-containing pro        | 118403772 | NP_00107284 | 0.55   | 2.41    | 0      | 0      | 0.25   | 0      | 1.81   | 0      | 1.25   | 76.6   | 79.26  | 48.08  |
| 1-2.c43281/1/3847  | PREDICTED: actin, cytoplas       | 795093282 | XP_01181546 | 1.11   | 0       | 0      | 0      | 0      | 0      | 1.57   | 1.07   | 0      | 43.34  | 27.06  | 88.5   |
| 1-2.e23595/1/7023  | .beta-actin [Scomberomorus n     | 836592739 | AKM70876.1  | 0      | 0       | 0      | 0      | 0      | 0      | 0      | 0      | 0      | 91.17  | 45.32  | 160.34 |
| 1-2.e5988/17/1605  | tomm22 protein [Xenopus (S       | 169642622 | AAI60473.1  | 15.83  | 20.5    | 12.2   | 11.58  | 18     | 7.34   | 10.46  | 9.59   | 6.71   | 0      | 0      | 0      |
| 1-2.e27273/8/1480  | novel aldo-keto reductase fam    | 113931624 | NP_00103926 | 16.96  | 4.12    | 27.98  | 25.5   | 27.92  | 16.47  | 12.89  | 14.29  | 18.43  | 0      | 0      | 0      |
| 2-3.e17057/1/5105  | PREDICTED: serine protease       | 301606403 | XP_00293282 | 33.8   | 0       | 5.98   | 14.56  | 13.27  | 4.85   | 0      | 14.17  | 0.55   | 0      | 0      | 0      |
| 1-2.e49686/1/1384  | --                               | --        | --          | 16.71  | 0.89    | 0      | 0      | 0      | 0      | 0      | 0      | 12.37  | 31     | 35.1   | 28.95  |
| 1-2.e19767/1/1482  | protease, serine, 8 precursor [  | 148222777 | NP_00108172 | 1.47   | 2.64    | 3.71   | 1.79   | 0.39   | 0      | 11.2   | 2.82   | 3.22   | 224.97 | 319.57 | 200.23 |
| 1-2.e9009/3/1421   | RecName: Full=Casein kinas       | 20141531  | P28020.2    | 20.44  | 24.31   | 4.06   | 14.44  | 13.18  | 13.61  | 7.32   | 6.49   | 11.97  | 0      | 0      | 0      |
| 2-3.e16603/1/1966  | reverse transcriptase, partial [ | 513131148 | AGO18322.1  | 15.79  | 1.95    | 6.29   | 9.7    | 6.65   | 15.75  | 5.74   | 15.84  | 6.05   | 0      | 0      | 0      |
| 1-2.e48567/1/1601  | PREDICTED: protein phosph        | 512830294 | XP_00491303 | 20.83  | 3.66    | 12.71  | 17.44  | 21.76  | 11.57  | 8.39   | 20.14  | 16.76  | 0.14   | 0      | 0      |
| 1-2.e13686/6/1656  | PREDICTED: NAD(P) transl         | 768393841 | XP_01159266 | 42.93  | 0       | 0      | 0      | 0      | 0      | 0      | 0      | 39.03  | 22.84  | 18.24  | 27.02  |
| 1-2.e44800/2/1252  | golgi reassembly stacking prc    | 89267909  | CAJ82834.1  | 11.41  | 0.18    | 6.72   | 0      | 0      | 0      | 7.75   | 0      | 6.12   | 29.13  | 42.24  | 22.43  |
| 2-3.e49393/1/2313  | --                               | --        | --          | 0      | 0       | 0.71   | 0      | 0      | 0      | 0      | 0.12   | 3.25   | 13.54  | 19.95  | 12.27  |
| 1-2.e25705/3/1472  | --                               | --        | --          | 0      | 0       | 0      | 0      | 0      | 0      | 12.69  | 0      | 0      | 67.1   | 112.51 | 32.02  |
| 2-3.e28061/1/2114  | --                               | --        | --          | 0      | 0       | 1.06   | 0      | 0      | 0      | 0      | 0      | 0      | 10.64  | 22.6   | 18.96  |
| 2-3.e40548/2/1995  | PREDICTED: 5'-3' exoribom        | 301620220 | XP_00293947 | 4.31   | 27.14   | 4.12   | 3.04   | 9.2    | 12.14  | 2.38   | 2.29   | 2.84   | 0      | 0      | 0.01   |
| 2-3.e11883/2/2376  | PREDICTED: AMP deamina           | 706103160 | XP_01020846 | 0      | 41.66   | 171.37 | 54.96  | 85.51  | 162.79 | 0      | 132.08 | 0      | 4.06   | 0      | 0      |
| 2-3.e48609/1/2373  | --                               | --        | --          | 0      | 0       | 0      | 0      | 0      | 0.28   | 16.22  | 4.85   | 0      | 117.94 | 107.8  | 49.06  |
| 1-2.e2253/15/1434  | PREDICTED: voltage-depen         | 823417697 | XP_01241955 | 72.46  | 76.05   | 121.34 | 67.02  | 88.26  | 108.58 | 45.42  | 61.5   | 69.85  | 0      | 0      | 2.8    |
| 1-2.e46934/2/1201  | tubulin beta chain-like [Scler   | 820146195 | KKX13732.1  | 0      | 0       | 0      | 0      | 0      | 0      | 0      | 0      | 0      | 158.55 | 146.74 | 33.58  |
| 2-3.e49731/1/2071  | --                               | --        | --          | 0      | 0       | 0      | 0      | 0      | 0      | 0      | 0      | 0      | 35.87  | 39.37  | 69.3   |
| 2-3.e38214/47/2580 | RecName: Full=Sarcoplasmic       | 9789732   | Q92105.1    | 303.67 | 0       | 0      | 298.7  | 378.34 | 236.23 | 0.02   | 540.95 | 0      | 0      | 0      | 12.42  |
| 2-3.e63564/3/1811  | PREDICTED: elongation fac        | 821107511 | XP_01237905 | 0      | 0       | 0      | 0      | 0      | 0      | 0      | 0      | 0      | 162.15 | 51.59  | 66.75  |
| 1-2.e49773/1/1338  | heterogeneous nuclear ribonu     | 45361501  | NP_989327.1 | 0      | 0       | 0      | 0      | 0      | 0      | 0      | 0      | 7.36   | 33.13  | 25.3   | 17.6   |
| 1-2.e43826/1/1255  | PREDICTED: E3 ubiquitin-p        | 847100968 | XP_01281275 | 0      | 0       | 0      | 0      | 0      | 0      | 8.19   | 0      | 0      | 30.41  | 41.77  | 15.38  |
| 1-2.e52310/5/1399  | PREDICTED: ATP synthase          | 557324504 | XP_00603528 | 251.51 | 166.21  | 177.83 | 219.65 | 154.41 | 125.55 | 164.4  | 221.43 | 290.72 | 5.66   | 0      | 1.82   |
| 2-3.e12984/1/2041  | uncharacterized protein C6ori    | 187608789 | NP_00112027 | 0      | 8.51    | 0.33   | 0      | 0      | 0      | 7.37   | 0      | 0      | 21.11  | 11.21  | 12.22  |
| 2-3.e28064/2/2107  | PREDICTED: ATP-depende           | 551492924 | XP_00579803 | 16.04  | 16.29   | 0      | 0      | 0      | 0      | 16.01  | 5.26   | 0      | 14.14  | 14.71  | 14.22  |
| 1-2.e9417/11/1793  | homogentisate 1,2-dioxygena      | 148230238 | NP_00108750 | 25.61  | 25.05   | 24.56  | 10.66  | 9.64   | 5.07   | 7.91   | 13     | 11.22  | 0      | 0      | 0      |
| 1-2.e51905/2/1359  | eukaryotic translation initiati  | 147901729 | NP_00108058 | 7.24   | 0       | 0      | 0      | 0      | 0      | 2.03   | 0      | 24.57  | 25.27  | 31.64  | 15.06  |
| 2-3.e53810/1/5367  | .larva-specific keratin RLK [R   | 14017762  | BAB47395.1  | 0      | 84.38   | 0      | 0      | 0      | 0      | 0      | 0      | 150.91 | 118.75 | 753.05 | 796.85 |
| 2-3.e58790/1/2310  | --                               | --        | --          | 9.73   | 1.07    | 0      | 0      | 0      | 2.14   | 54.03  | 1.94   | 25.07  | 241.02 | 295.51 | 98.47  |
| 1-2.e18674/1/1218  | DCN1-like protein 2 [Xenopt      | 187607513 | NP_00112003 | 6.43   | 6.97    | 13.33  | 7.13   | 14.46  | 18.91  | 15.85  | 11.38  | 0.55   | 0      | 0      | 0      |
| 2-3.e11717/10/2071 | PREDICTED: tubulin beta ct       | 795248736 | XP_01185447 | 0      | 0       | 0      | 0      | 0      | 0      | 22.01  | 0      | 0      | 21.26  | 11.79  | 9.91   |
| 1-2.e38348/1/1336  | serum paraoxonase/arylester      | 148232543 | NP_00108064 | 17.77  | 2.57    | 31.56  | 16.05  | 28.94  | 17.15  | 0      | 18.72  | 17.35  | 0      | 0      | 0      |
| 1-2.e38530/1/1252  | --                               | --        | --          | 9.62   | 0       | 0      | 0      | 0      | 0.03   | 4.69   | 0.95   | 0.21   | 20.29  | 31.21  | 33.41  |
| 1-2.e7274/6/1353   | PREDICTED: nebulin isoform       | 847166495 | XP_01282660 | 0      | 22.73   | 0      | 0      | 0      | 0      | 0      | 0      | 0      | 91.94  | 80.94  | 20     |
| 2-3.e13689/2/2027  | PREDICTED: plasma membe          | 847108317 | XP_01281394 | 37.68  | 7.95    | 12.1   | 35.66  | 24.7   | 14.4   | 23.23  | 16.2   | 31.97  | 0.73   | 0.21   | 0.01   |
| 1-2.e52174/2/1624  | PREDICTED: alpha-actinin-        | 558140029 | XP_00611831 | 0      | 0       | 0      | 0      | 0      | 0      | 0      | 0      | 0      | 18.68  | 27.34  | 8.89   |
| 1-2.e12630/2/1300  | PREDICTED: Y+L amino ac          | 602645598 | XP_00742923 | 0      | 0.33    | 0      | 0.38   | 0      | 0.28   | 12.45  | 0      | 0      | 65.63  | 85.47  | 51.26  |
| 1-2.e39903/2/1257  | glutamate oxaloacetate trans     | 333805525 | BAK26556.1  | 0      | 0       | 0      | 0      | 0      | 0      | 0      | 0      | 0      | 48.75  | 57.04  | 14.51  |
| 1-2.e49089/1/1468  | Y+L amino acid transporter 2     | 147902872 | NP_00109124 | 0      | 0       | 0      | 0      | 0      | 0      | 13.65  | 0.01   | 0      | 25.53  | 20.88  | 15.71  |
| 1-2.e52344/2/1299  | actin, alpha cardiac muscle 2    | 45361557  | NP_989355.1 | 49.28  | 4.69    | 154.68 | 76.12  | 159.38 | 116.74 | 50.7   | 139.07 | 67.02  | 2.94   | 0      | 2.76   |

|                     |                                |           |             |       |        |       |        |        |        |       |        |        |        |        |
|---------------------|--------------------------------|-----------|-------------|-------|--------|-------|--------|--------|--------|-------|--------|--------|--------|--------|
| 2-3.c3904/1/2488.1  | --                             | --        | 25.05       | 7.86  | 32.06  | 5.24  | 13.69  | 20.85  | 2.22   | 11.17 | 8.02   | 0      | 0      | 0.12   |
| 2-3.c20434/3/2208   | PREDICTED: ATP-depender        | 829804302 | XP_01262791 | 7.17  | 4.3    | 5.03  | 2.84   | 5.92   | 10.82  | 2.59  | 0      | 0.17   | 0      | 0      |
| 1-2.c25477/1/1459   | --                             | --        | 0           | 0     | 0      | 0     | 0      | 0      | 4.28   | 3.61  | 0      | 25.76  | 25.13  | 9.12   |
| 2-3.c25444/2/2551   | PREDICTED: death-associat      | 847142187 | XP_01282150 | 8.98  | 0.08   | 8.24  | 7.44   | 8.75   | 3.24   | 2.91  | 0      | 4.83   | 0      | 0      |
| 2-3.e18837/1/2422   | --                             | --        | 2.3         | 1.65  | 0      | 0     | 0      | 2.27   | 8.21   | 5.31  | 5.6    | 129.2  | 198.5  | 119.1  |
| 2-3.e41903/1/2083   | homeodomain-interacting pro    | 118404554 | NP_00107275 | 1.82  | 9.27   | 9.11  | 8.12   | 3.06   | 7.73   | 0     | 4.5    | 9.22   | 0      | 0      |
| 2-3.c7657/4/2527    | PREDICTED: chaperone acti      | 557262176 | XP_00601661 | 4.15  | 12.96  | 10.23 | 5.43   | 6.37   | 2.79   | 2.05  | 2.37   | 5.13   | 0      | 0      |
| 1-2.e28454/1/1353   | structural maintenance of chrn | 148232365 | NP_00108045 | 0.13  | 0      | 0     | 0      | 0      | 6.64   | 0.26  | 0      | 17     | 31.07  | 15.25  |
| 3-6.c14596/1/3278   | hypothetical protein [Plasmoc  | 156094450 | XP_00161326 | 6.55  | 0      | 20.2  | 8.57   | 10.08  | 3.51   | 1.33  | 15.29  | 6.15   | 0      | 0      |
| 1-2.c5593/1/1588    | Ras-related GTP binding C [2   | 148227166 | NP_00108840 | 0     | 0      | 0     | 0      | 0      | 0      | 0     | 0      | 18.97  | 23.9   | 10.52  |
| 2-3.c39819/2/2237   | uncharacterized protein LOC    | 189217724 | NP_00112130 | 0     | 1.41   | 0     | 0      | 0      | 0.58   | 0     | 1.01   | 8.57   | 10.51  | 14.81  |
| 1-2.c50832/6/1778   | tropomyosin alpha-1 chain [X   | 52345962  | NP_00100502 | 0     | 0      | 0.92  | 0      | 0      | 1.51   | 0     | 0      | 11.65  | 19.19  | 13.45  |
| 2-3.c9016/1/2157.1  | PREDICTED: mitogen-activa      | 512866147 | XP_00491777 | 7.37  | 2.82   | 16.93 | 6.6    | 7.66   | 4.68   | 4.25  | 8.06   | 7.23   | 0      | 0      |
| 1-2.e18629/1/1579   | PREDICTED: E3 ubiquitin-p      | 512856132 | XP_00294355 | 0     | 0      | 0     | 0      | 0      | 2.62   | 0     | 0      | 22.1   | 18.78  | 9.58   |
| 2-3.e1764/13/2275   | PREDICTED: adenosine kin       | 874462866 | XP_01295145 | 3.45  | 11.81  | 8.97  | 2.29   | 5.93   | 8.06   | 2.51  | 2.25   | 3.53   | 0      | 0      |
| 2-3.c29912/1/2077   | Calnexin, partial [Anas platyr | 483507247 | EOA97896.1  | 0.22  | 0.75   | 1.1   | 0      | 0      | 0.2    | 0     | 0      | 8.37   | 9.58   | 17.68  |
| 1-2.e13863/3/1361   | PREDICTED: MAP7 domain         | 512819424 | XP_00491162 | 27.56 | 4.32   | 18.57 | 9.33   | 11.52  | 7.8    | 2.26  | 8.62   | 0      | 0      | 0      |
| 1-2.e4461/2/1493    | LOC398314 protein, partial [   | 68534356  | AAH99043.1  | 0     | 0      | 0     | 0      | 0      | 24.74  | 0     | 5.87   | 21.34  | 23.45  | 9.11   |
| 1-2.e5180/1/1513.1  | --                             | --        | 1.36        | 0     | 0      | 0.31  | 0      | 0.05   | 0      | 2.43  | 0.32   | 55.2   | 67.89  | 27.47  |
| 2-3.e54534/1/2093   | Uba1a protein [Xenopus laevis  | 28958137  | AAH47256.1  | 7.06  | 13.27  | 5.28  | 2.36   | 6.66   | 8.38   | 3.99  | 0      | 3.63   | 0      | 0      |
| 3-6.e4513/4/2927    | PREDICTED: baculoviral IA      | 847099212 | XP_01281215 | 0     | 0      | 0.32  | 0      | 0      | 0      | 0     | 5.79   | 23.5   | 15.17  | 39.86  |
| 1-2.c28833/2/1760   | GDP dissociation inhibitor 2   | 148234617 | NP_00108023 | 0     | 2.75   | 0     | 0      | 0      | 11.27  | 0     | 0      | 11.09  | 11.11  | 19.69  |
| 2-3.e13047/1/2370   | 3-hydroxyisobutyrate dehydr    | 71896099  | NP_00102566 | 16.29 | 26.32  | 19.79 | 21.72  | 17.95  | 19.09  | 11.76 | 15.93  | 16.62  | 0.94   | 0      |
| 1-2.e27799/2/1629   | ankyrin repeat and SOCS box    | 148229923 | NP_00108543 | 18.24 | 0      | 7.83  | 6.98   | 10.51  | 4.03   | 8.13  | 12.25  | 14.68  | 0      | 0      |
| 2-3.c23405/1/2075   | PREDICTED: nascent polype      | 768400950 | XP_01159635 | 72.42 | 28.31  | 55.48 | 51.26  | 39.49  | 90.38  | 34.58 | 48.7   | 55.73  | 0.28   | 3.99   |
| 2-3.c38919/1/2106   | --                             | --        | 1.2         | 2.28  | 0      | 0     | 0      | 0      | 0.67   | 0     | 0      | 12.07  | 13.13  | 7.78   |
| 1-2.c39880/1/1956   | PREDICTED: casein kinase 1     | 847117974 | XP_01281644 | 0.3   | 0      | 0     | 0      | 0      | 8.75   | 0.39  | 4.14   | 17.06  | 14.34  | 5.48   |
| 2-3.c53640/1/1784   | CD63 antigen [Rana catesbeii   | 226372482 | ACO51866.1  | 0.05  | 7.6    | 5.37  | 10.81  | 10.46  | 8.4    | 12.88 | 9.06   | 0.04   | 0      | 0.11   |
| 2-3.e7776/1/2186    | --                             | --        | 2.92        | 10.55 | 5.15   | 5.67  | 5.45   | 4.01   | 0      | 1.18  | 4.51   | 0      | 0      | 0      |
| 1-2.e12205/1/1792   | thrombospondin-4 precursor [   | 118404528 | NP_00107267 | 17.77 | 41.66  | 25.47 | 19.29  | 15.54  | 21.82  | 5.37  | 22.34  | 25.68  | 0      | 0.64   |
| 1-2.e2116/28/1771   | PREDICTED: ornithine amin      | 768381361 | XP_01158831 | 54.79 | 42.47  | 80    | 74.8   | 56.66  | 93.8   | 35.5  | 41.16  | 58.45  | 0.34   | 2.75   |
| 3-6.e9358/4/3478    | periostin precursor [Xenopus   | 163915007 | NP_00110637 | 1.18  | 183.53 | 0.15  | 13.63  | 3.67   | 22.58  | 0     | 17.39  | 0      | 0      | 0      |
| 1-2.e7489/4/1483    | heterogeneous nuclear ribonu   | 147903924 | NP_00108056 | 0     | 0      | 0     | 0      | 0      | 0      | 0     | 3.21   | 11.52  | 15.83  | 21.42  |
| 1-2.e51610/3/1635   | PREDICTED: tubulin beta ct     | 823416057 | XP_01241517 | 8.89  | 0      | 0     | 0      | 0      | 0      | 0     | 0      | 17.37  | 19.04  | 6.87   |
| 2-3.e14771/1/2416   | --                             | --        | 2.87        | 0.97  | 4.44   | 2.23  | 4.98   | 6.19   | 3.88   | 1.75  | 0.69   | 0      | 0      | 0      |
| 1-2.c32857/2/1449   | cholinephosphotransferase 1    | 213983097 | NP_00113565 | 0     | 0      | 0     | 0      | 0      | 0      | 0     | 0      | 24.5   | 28.13  | 27.24  |
| 1-2.c45671/1/1548   | ER membrane protein compl      | 147906471 | NP_00108517 | 18.51 | 16.18  | 4.91  | 7.98   | 8.57   | 12.97  | 0     | 2.62   | 3.29   | 0      | 0      |
| 1-2.e46319/1/1604   | PREDICTED: casein kinase 1     | 847117966 | XP_01281643 | 2.43  | 12.15  | 3.98  | 7.55   | 8.19   | 5.39   | 0     | 3.81   | 2.57   | 0      | 0      |
| 1-2.c33121/1/7580   | PREDICTED: poly(rC)-bindi      | 847099221 | XP_01281215 | 0     | 3.41   | 27.46 | 25.06  | 28.61  | 12.97  | 0     | 6.35   | 0      | 0      | 0      |
| 1-2.e41396/2/1583   | Protein kinase C and casein k  | 148232870 | NP_00107941 | 6.74  | 3.71   | 4.45  | 6.33   | 4.57   | 10.55  | 10.69 | 0.2    | 6.33   | 0      | 0      |
| 2-3.e40338/1/2041.1 | --                             | --        | 7.68        | 1.3   | 1.09   | 0.95  | 3.35   | 6.87   | 1.77   | 1.38  | 2.81   | 658.55 | 278.78 | 574.47 |
| 3-6.e17475/13/3451  | PREDICTED: superkiller viri    | 301623717 | XP_00294115 | 1.46  | 13.25  | 2.27  | 2.74   | 2.79   | 3.2    | 0.72  | 2.76   | 1.07   | 0      | 0      |
| 2-3.e51746/3/2360.1 | --                             | --        | 14.96       | 5.48  | 0      | 0     | 0      | 0      | 0      | 0     | 0      | 33.46  | 27.87  | 28.41  |
| 3-6.e14516/1/3159   | PREDICTED: nebulin-like is     | 557018869 | XP_00600980 | 8.76  | 0      | 0.05  | 32.17  | 89.25  | 87.15  | 30.96 | 84.37  | 0      | 5.48   | 0      |
| 2-3.e8146/1/1992.1  | --                             | --        | 23.75       | 4.47  | 0      | 16.29 | 10.05  | 7.82   | 0      | 38.73 | 0      | 0      | 0      | 0      |
| 1-2.e26130/1/1312   | BTB/POZ domain-containing      | 187607270 | NP_00112048 | 0     | 3.31   | 0     | 0      | 0      | 0      | 0.53  | 0.25   | 14.54  | 20.18  | 18.05  |
| 2-3.c62420/52/2257  | gnl3-prov protein, partial [Xe | 38649400  | AAH63220.1  | 0.14  | 22.69  | 0.09  | 4.19   | 3.54   | 6.44   | 0     | 3.63   | 1.34   | 0      | 0      |
| 3-6.e4887/2/2789    | Citrate synthase [Danio rerio] | 183986405 | AAI66040.1  | 29.26 | 66.54  | 94.87 | 88.55  | 91.35  | 71.89  | 68.74 | 56.47  | 17.83  | 0.7    | 2.8    |
| 2-3.c51390/30/2255  | sankyrin-1 [Xenopus (Silurana  | 73853810  | NP_00102748 | 29.19 | 21.83  | 108.7 | 90.27  | 70.19  | 123.99 | 87.84 | 29.06  | 60.03  | 3.04   | 1.69   |
| 2-3.e54357/1/2072   | PREDICTED: cystinosin isof     | 847100949 | XP_01281274 | 0     | 0      | 0     | 0      | 0      | 0.55   | 0     | 0      | 19.7   | 22.96  | 20.38  |
| 1-2.e14836/1/1596   | PREDICTED: LOW QUALI           | 573880367 | XP_00662838 | 1.62  | 54.16  | 310.5 | 207.18 | 223.46 | 138.06 | 1.52  | 276.59 | 1.94   | 16.8   | 0.27   |
| 1-2.e20465/2/1448   | --                             | --        | 0           | 0     | 0      | 0     | 0      | 0      | 4.65   | 0     | 0      | 14.77  | 10.3   | 20     |
| 1-2.e30366/1/1319   | CD63 antigen [Rana catesbeii   | 226372482 | ACO51866.1  | 4.52  | 53.64  | 42.34 | 58.62  | 76.57  | 20.03  | 59.37 | 53.24  | 2.3    | 0      | 0.88   |
| 2-3.e17712/1/2674   | bystin [Xenopus (Silurana) tr  | 62752053  | NP_00101583 | 7.89  | 7.18   | 4.67  | 4.03   | 3.55   | 5.44   | 3.32  | 2.94   | 0      | 0.05   | 0      |
| 2-3.c49251/1/4697   | PREDICTED: plasma membe        | 847108317 | XP_01281394 | 15.77 | 0      | 5.74  | 10.42  | 14.78  | 3.09   | 5.13  | 1.9    | 7.08   | 0      | 0      |
| 1-2.e29698/1/1198   | --                             | --        | 0           | 0     | 0      | 0     | 0      | 0      | 0      | 0.35  | 0      | 23.83  | 22.45  | 8.38   |
| 1-2.e11613/1/1633   | PREDICTED: glycogen phos       | 426369041 | XP_00405150 | 4.14  | 0      | 11.82 | 14.33  | 14     | 3.11   | 12.51 | 9.71   | 6.64   | 0      | 0      |
| 1-2.c43038/1/1480   | --                             | --        | 0           | 31.53 | 7.69   | 9.46  | 8.7    | 27.95  | 13.39  | 9.3   | 0.05   | 0      | 0      | 0      |

|                    |                                 |           |             |         |        |         |        |         |        |         |        |         |         |         |         |
|--------------------|---------------------------------|-----------|-------------|---------|--------|---------|--------|---------|--------|---------|--------|---------|---------|---------|---------|
| 1-2.c81357/1864    | PREDICTED: citrate synthas      | 557324568 | XP_00603531 | 61.05   | 1.12   | 0.77    | 0.49   | 0.08    | 0.47   | 0.31    | 0.27   | 61.45   | 51.38   | 47.98   | 46.76   |
| 1-2.e10246/82/1317 | mitochondrial inorganic phos    | 22653426  | AAN04052.1  | 341     | 0      | 289.55  | 139.84 | 227.83  | 144.3  | 172.56  | 103.14 | 76.07   | 0       | 0       | 13.88   |
| 1-2.e21108/3/1509  | PREDICTED: RNA-binding          | 301612449 | XP_00293572 | 3.25    | 0      | 0       | 0      | 0       | 0      | 1.58    | 2.12   | 0.79    | 12.49   | 12.4    | 14.11   |
| 3-6.c999/47/3266   | thrombospondin-4 precursor      | 118404528 | NP_00107267 | 17.48   | 31.11  | 27.44   | 15.01  | 6.23    | 22.46  | 2.11    | 9.01   | 11.84   | 0.5     | 0       | 0.4     |
| 1-2.c44202/1/1541  | Uncharacterized protein B04f    | 677429359 | KFQ30293.1  | 0       | 0      | 0       | 0      | 0       | 0      | 0       | 0      | 17.83   | 21.74   | 42.9    | 12.65   |
| 2-3.c34028/3/2472  | ethanolamine-phosphate phos     | 147905107 | NP_00108663 | 2.39    | 11.96  | 1.84    | 5.36   | 4.49    | 0      | 57.98   | 4.42   | 2.31    | 306.25  | 488.83  | 254.74  |
| 2-3.c60283/1/2759  | RNA-binding protein 24 [Xei     | 45360685  | NP_989016.1 | 3.63    | 3.09   | 1.38    | 2.79   | 2.43    | 4.44   | 0.79    | 1.15   | 1.49    | 0       | 0       | 0       |
| 2-3.c63612/1/2086  | PREDICTED: aspartate--tRN       | 847163066 | XP_01282572 | 0       | 0      | 0       | 0      | 0       | 0      | 0       | 0      | 0       | 9.41    | 8.39    | 7.95    |
| 1-2.c7003/5/1440   | synaptophysin-like protein 2    | 54606873  | NP_00100611 | 56.49   | 68.83  | 130.07  | 83.23  | 68      | 156.96 | 38.24   | 66.17  | 67.62   | 2.62    | 2.73    | 4.21    |
| 1-2.c37657/1/1489  | --                              | --        | --          | 61.1    | 56.95  | 139.11  | 80.07  | 46.31   | 98.82  | 85.44   | 79.15  | 49.96   | 3.27    | 0.35    | 3.17    |
| 2-3.c626879/1/2245 | PREDICTED: calcium/calme        | 847142050 | XP_01282146 | 1.85    | 3.41   | 2.29    | 2.22   | 4.23    | 4.86   | 1.98    | 1.21   | 3.2     | 0       | 0       | 0       |
| 1-2.c8141/4/1761   | PREDICTED: dolichyl-diphe       | 847168158 | XP_01282717 | 0       | 0      | 0       | 0      | 0.3     | 0      | 0       | 0      | 0.91    | 21.95   | 20.86   | 25.67   |
| 3-6.c14588/1/3800  | --                              | --        | --          | 21.39   | 8.45   | 18.91   | 39.15  | 24.33   | 21.88  | 23.52   | 27.94  | 40.07   | 0       | 0       | 2.46    |
| 1-2.c29941/1/1249  | --                              | --        | --          | 0       | 0      | 0       | 0      | 0       | 0      | 0.96    | 1.85   | 0       | 20.98   | 12.81   | 10.66   |
| 1-2.c3232/1/1261   | fatty acid binding protein 3, n | 160774264 | AAI55023.1  | 0       | 0      | 0       | 0      | 0       | 0      | 0       | 0      | 0       | 28.43   | 14.13   | 8.96    |
| 1-2.c34228/1/1368  | --                              | --        | --          | 0       | 0      | 0       | 0      | 0       | 0      | 0       | 0      | 0       | 22.07   | 37.63   | 9.79    |
| 2-3.c6464/1/9356.1 | lysophosphatidylcholine acyl    | 148228263 | NP_00108886 | 0       | 0      | 0       | 0      | 0       | 0      | 2.12    | 0      | 0       | 39.53   | 51.47   | 11.99   |
| 1-2.e15772/1/9144  | PREDICTED: LOW QUALI            | 637377851 | XP_00812323 | 2447.03 | 387.59 | 0       | 0      | 0       | 0      | 5317.42 | 0      | 0       | 5554.9  | 4681.93 | 0       |
| 1-2.c28317/2/1270  | voltage-dependent anion char    | 147906224 | NP_00108535 | 0       | 0      | 0       | 0      | 0       | 0      | 0       | 0      | 0       | 51.74   | 55.66   | 9.82    |
| 1-2.c32943/1/8414  | PREDICTED: protein PFC07        | 556961274 | XP_00599098 | 61.51   | 38.36  | 130.08  | 84.33  | 33.21   | 95.52  | 90.99   | 65.57  | 40.79   | 2.73    | 1.05    | 2.96    |
| 2-3.c25926/1/2216  | --                              | --        | --          | 0       | 0      | 0       | 0.74   | 0       | 0      | 3.45    | 2.1    | 0       | 54.36   | 86.34   | 46.38   |
| 1-2.c15204/1/1023  | isocitrate dehydrogenase 2 (N   | 148227256 | NP_00108032 | 30.5    | 0      | 0       | 0      | 0       | 0      | 4.25    | 0      | 0       | 20.89   | 53.98   | 21.09   |
| 1-2.c27544/1/1407  | PREDICTED: LOW QUALI            | 731504681 | XP_01059620 | 3.27    | 2.22   | 0       | 0      | 0       | 0.19   | 3.2     | 0      | 0       | 18.07   | 28.73   | 16.65   |
| 1-2.c19175/4/1719  | PREDICTED: dolichyl-diphe       | 597761591 | XP_00724478 | 0       | 0      | 0       | 0      | 0       | 0      | 0       | 0      | 5.3     | 14.27   | 20.31   | 4.95    |
| 2-3.c7175/7/2135   | acetyl-CoA acetyltransferase    | 148234082 | NP_00108602 | 5.74    | 6.17   | 7.33    | 3.42   | 4.13    | 4.7    | 3.27    | 3.92   | 3.09    | 0       | 0       | 0       |
| 3-6.c3139/7/3219   | PREDICTED: calcium-bindin       | 664741920 | XP_00852826 | 0       | 0      | 7.52    | 2.05   | 3.72    | 1.35   | 0       | 0      | 5.19    | 0       | 0       | 0       |
| 3-6.c3508/3/3339   | PREDICTED: junctophilin-2       | 301607262 | XP_00293323 | 42.5    | 24     | 67.32   | 49.1   | 70.73   | 129.17 | 48.67   | 71.97  | 56.72   | 9.71    | 0       | 0       |
| 1-2.c11240/2/1417  | PREDICTED: heterogeneous        | 597735333 | XP_00722994 | 0.06    | 0      | 0       | 0.13   | 0       | 0      | 16.27   | 0      | 10.17   | 43.54   | 81.44   | 23.47   |
| 1-2.c45092/1/1501  | PREDICTED: UAP56-interac        | 512859648 | XP_00491695 | 0       | 0      | 14.36   | 10.67  | 17.65   | 41.09  | 27.04   | 0      | 18.72   | 0.16    | 0       | 0       |
| 1-2.c34320/1/1412  | --                              | --        | --          | 2.29    | 0      | 0       | 0      | 0       | 0      | 0       | 0      | 0       | 12.62   | 11.64   | 11.17   |
| 1-2.c29465/1/1788  | PREDICTED: dnaJ homolog         | 301610031 | XP_00293455 | 0       | 11.2   | 3.9     | 4.71   | 4.56    | 4.94   | 7.04    | 2.5    | 0.07    | 0       | 0       | 0       |
| 2-3.c37908/1/2334  | fragile X mental retardation s  | 147899444 | NP_00108178 | 0       | 0      | 0       | 17.27  | 27.92   | 52.51  | 0       | 21.1   | 0       | 2.36    | 1.19    | 0       |
| 2-3.c62450/4/2489  | PREDICTED: mitogen-activ        | 847126378 | XP_01281804 | 2.86    | 6.45   | 2.76    | 2.25   | 2.33    | 5.01   | 2.23    | 1.68   | 3.22    | 0       | 0       | 0       |
| 1-2.c4093/10/1626  | PREDICTED: rRNA 2'-O-me         | 558189237 | XP_00612907 | 13.05   | 119.71 | 11.87   | 26.52  | 26.96   | 59.07  | 10.49   | 22.31  | 10.16   | 1.95    | 0.71    | 0.92    |
| 1-2.c37910/5/1300  | PREDICTED: actin, alpha ca      | 803091489 | XP_00401102 | 9.28    | 1.06   | 80.33   | 29.67  | 39.12   | 59.71  | 65.69   | 44.63  | 15.92   | 0.27    | 2.3     | 1.56    |
| 1-2.c32943/1/8414  | --                              | --        | --          | 76.65   | 65.93  | 167.49  | 104.27 | 72.77   | 210.6  | 131.02  | 84.28  | 80.97   | 2.18    | 1.32    | 8.86    |
| 2-3.c55459/1/2136  | --                              | --        | --          | 0       | 0      | 0       | 0.33   | 0       | 0      | 0       | 0      | 2.45    | 51.09   | 52.16   | 17.84   |
| 1-2.c48697/1/1502  | PREDICTED: large neutral a      | 847086110 | XP_01281357 | 5.12    | 0.8    | 0       | 0      | 0       | 19.46  | 1.12    | 3.67   | 226.73  | 176.68  | 16.51   | 0       |
| 3-6.c6256/1/3668.3 | --                              | --        | --          | 2.77    | 0.08   | 1.98    | 8.42   | 12.58   | 0      | 266.9   | 8.65   | 0       | 646.89  | 623.69  | 590.16  |
| 1-2.c33221/1/5086  | NADH dehydrogenase subun        | 164519190 | YP_00164887 | 0       | 0      | 0       | 4.15   | 26.5    | 21.7   | 4.74    | 6.48   | 18.64   | 0       | 0       | 0       |
| 3-6.c15807/1/5101  | RecName: Full=Sarcoplasmic      | 9789732   | Q92105.1    | 477.92  | 57.34  | 3500.07 | 200.11 | 1011.94 | 554.94 | 505.05  | 782.21 | 3065.79 | 0       | 3.76    | 0       |
| 2-3.c51054/4/2303  | PREDICTED: uncharacterize       | 847110867 | XP_01281475 | 2.72    | 0      | 3.7     | 3.04   | 2.12    | 4.74   | 1.45    | 0.59   | 2.22    | 0       | 0       | 0       |
| 2-3.c26860/4/2225  | PREDICTED: ubiquitin carbi      | 847100581 | XP_01281262 | 0.86    | 0      | 2.96    | 3.1    | 3.51    | 3.39   | 1.73    | 3.93   | 0       | 0       | 0       | 0       |
| 1-2.c45091/1/1270  | solute carrier family 3, memb   | 148229024 | NP_00108024 | 0       | 5.93   | 5.99    | 18.95  | 17.36   | 3.3    | 0       | 0      | 34.97   | 0       | 0       | 0       |
| 1-2.c5151/6/1369   | PREDICTED: potassium cha        | 545835340 | XP_00565346 | 0.44    | 1.49   | 0.18    | 0.86   | 0.2     | 0.44   | 14.34   | 0.51   | 0.93    | 36.62   | 70.66   | 59.49   |
| 1-2.c25479/4/1349  | ubiquinol-cytochrome c reduct   | 148223261 | NP_00108668 | 6.18    | 7.57   | 0       | 2.15   | 2.33    | 0      | 109.86  | 0      | 76.62   | 142.72  | 194.87  | 76.91   |
| 2-3.c60875/2/2495  | PREDICTED: 14-3-3 protein       | 821027291 | XP_01235685 | 112.34  | 94.82  | 95.58   | 46.88  | 77.05   | 149.6  | 56.59   | 87.7   | 81.21   | 0       | 0       | 7.12    |
| 1-2.c22412/1/1302  | PREDICTED: actin, alpha ca      | 803091489 | XP_00401102 | 9.76    | 0.67   | 37.32   | 16.7   | 26.42   | 20.26  | 13.34   | 28.86  | 13.58   | 0.75    | 0       | 0.75    |
| 1-2.c38472/4/1496  | --                              | --        | --          | 21.66   | 0      | 0       | 0      | 0       | 0      | 3.14    | 0      | 3.96    | 9.6     | 15.44   | 6.74    |
| 2-3.c14521/1/2006  | Protein CBG19037 [Caenorh       | 309356830 | CAP36349.2  | 58.73   | 12.22  | 1.15    | 2.33   | 1.38    | 2.49   | 69.27   | 33.07  | 1.18    | 181.28  | 219.54  | 141.46  |
| 1-2.c50406/1/1224  | PREDICTED: actin-related p      | 768340511 | XP_01158074 | 0       | 0      | 0       | 0      | 0       | 0      | 43.08   | 0      | 17.55   | 184.11  | 285.62  | 29.31   |
| 1-2.c20761/1/1631  | SEC13 homolog [Xenopus la       | 148233584 | NP_00108044 | 0       | 7.42   | 0.17    | 0      | 0       | 0      | 1.6     | 0      | 2.03    | 16.74   | 3.4     | 12.74   |
| 1-2.c34576/1/1506  | --                              | --        | --          | 22.97   | 1.71   | 0.39    | 45.97  | 20.78   | 3.01   | 650.37  | 21.03  | 10.69   | 2115.36 | 1301.43 | 1733.26 |
| 3-6.c16661/1/2853  | PREDICTED: DNA-binding          | 620966761 | XP_00765655 | 1.83    | 0.29   | 0.5     | 3.37   | 2.4     | 1.44   | 0       | 3.33   | 0       | 0       | 0       | 0       |
| 1-2.c18576/1/1747  | PREDICTED: ubiquitin carbi      | 301614077 | XP_00293651 | 0       | 0      | 0       | 0      | 0       | 0      | 5.58    | 0      | 3.29    | 7.68    | 17.94   | 6.57    |
| 3-6.c6341/1/3171   | extracellular sulfatase Sulf-2  | 54020831  | NP_00100566 | 0       | 0      | 0       | 1.53   | 5.96    | 10.24  | 0       | 2.7    | 1.62    | 0       | 0       | 0       |
| 1-2.c14136/1/1746  | PREDICTED: glycerophosph        | 847157584 | XP_01282458 | 0.67    | 1.52   | 0.28    | 0.55   | 0.63    | 2.7    | 13.91   | 0.21   | 1.03    | 89.93   | 110.44  | 163.35  |
| 2-3.c4864/3/2416   | PREDICTED: ankyrin-1 isofi      | 847110220 | XP_01281466 | 18.13   | 0      | 71.15   | 40.35  | 66.45   | 28.19  | 26.38   | 17.34  | 28.7    | 0       | 0.83    | 4.58    |



|                    |                                |           |             |          |         |         |         |        |         |          |        |         |         |         |        |
|--------------------|--------------------------------|-----------|-------------|----------|---------|---------|---------|--------|---------|----------|--------|---------|---------|---------|--------|
| 1-2.c20903/1/1452  | solute carrier family 37 (gluc | 62201355  | AAH93460.1  | 0        | 0       | 0       | 0       | 0      | 0       | 0.03     | 0      | 0.8     | 15.46   | 9.5     | 6.91   |
| 1-2.c25526/1/1355  | Na-K-2Cl cotransporter 1 [Xe   | 147904042 | NP_00109133 | 1.7      | 4.66    | 0.95    | 1.7     | 0.73   | 1.76    | 10.64    | 1.44   | 1.97    | 106.82  | 131.88  | 104.16 |
| 3-6.c2655/10/4009  | PREDICTED: ATP-dependent       | 301608355 | XP_00293375 | 34.96    | 1.79    | 29.16   | 26.42   | 41.57  | 22.06   | 15.31    | 25.64  | 24.35   | 0.25    | 0       | 3.33   |
| 1-2.c47273/2/1538  | --                             | --        | --          | 11.84    | 78.63   | 0       | 0       | 0      | 0       | 10.35    | 0.04   | 65.08   | 81.91   | 45.07   | 13.51  |
| 1-2.c2114/44/1298  | actin, alpha cardiac muscle 2  | 45361557  | NP_989355.1 | 80.43    | 7.19    | 368.93  | 183.57  | 338.3  | 283.19  | 132.49   | 214    | 176     | 10.68   | 11.65   | 15.77  |
| 2-3.c54986/1/2343  | PREDICTED: WW domain-c         | 558170054 | XP_00612483 | 0        | 0       | 1.94    | 0       | 0      | 0       | 0        | 1.32   | 0       | 6.28    | 8.66    | 3.56   |
| 1-2.c36333/1/1697  | CD63 antigen [Rana catesbei    | 226372482 | ACO51866.1  | 0        | 13.03   | 8.41    | 5.53    | 4.79   | 12.83   | 25.57    | 16.21  | 0       | 0       | 0       | 0      |
| 2-3.c7392/1/2451.1 | PREDICTED: glycogen phos       | 512834332 | XP_00293541 | 65.84    | 5.14    | 77.92   | 100.67  | 113.42 | 36.77   | 0        | 68.37  | 73.66   | 0       | 0       | 7.17   |
| 3-6.c13916/1/3100  | --                             | --        | --          | 2.47     | 2.37    | 1.58    | 2.96    | 6.2    | 3.9     | 0.28     | 0.78   | 0.87    | 0       | 0       | 0.2    |
| 1-2.c42850/5/1273  | RecName: Full=Sarcoplasmic     | 9789732   | Q92105.1    | 0        | 0       | 0       | 0       | 0      | 0       | 344.8    | 0      | 0       | 2313.67 | 4242.5  | 62.63  |
| 1-2.c50568/1/1318  | solute carrier family 37 (gluc | 62201355  | AAH93460.1  | 0        | 2.11    | 0       | 0       | 0      | 0       | 0        | 0      | 0       | 8.29    | 10.84   | 15.87  |
| 1-2.c9613/42/1439  | actin, alpha cardiac muscle 2  | 45361557  | NP_989355.1 | 2.26     | 1.14    | 24.3    | 13.19   | 11.49  | 18.51   | 12.11    | 13.34  | 3.85    | 0.37    | 0       | 0.5    |
| 2-3.c51744/53/2162 | regulator of G-protein signali | 291290887 | NP_00116747 | 0.65     | 2.04    | 0       | 0       | 0.38   | 0       | 3.49     | 0.38   | 0       | 23.09   | 13.52   | 20.76  |
| 1-2.c19020/1/1481  | uncharacterized protein C9orf  | 288684380 | NP_00116577 | 0        | 0       | 0       | 0       | 0      | 0       | 0        | 0      | 0       | 12.17   | 14.18   | 6.47   |
| 1-2.c19564/1/7437  | PREDICTED: myosin regula       | 736243225 | XP_01078562 | 2.33     | 0       | 0       | 15.08   | 0      | 0       | 71.78    | 0      | 81.65   | 1017.87 | 1418.31 | 400.49 |
| 2-3.c61385/3/1953  | tetranectin precursor [Xenopi  | 58332698  | NP_00101142 | 10.81    | 2.44    | 19.23   | 19.4    | 15.67  | 2.62    | 0        | 9.07   | 8.98    | 0       | 0       | 0      |
| 2-3.c26687/1/2559  | --                             | --        | --          | 0        | 7.32    | 1.63    | 3.46    | 1.21   | 3.3     | 3.64     | 1.63   | 1.96    | 0       | 0       | 0      |
| 1-2.c12846/1/1900  | PREDICTED: protein PFC07       | 556961274 | XP_00599098 | 18.76    | 14.33   | 51.36   | 30.93   | 17.15  | 57.69   | 36.09    | 24.95  | 21.83   | 1.05    | 0.4     | 1.61   |
| 1-2.c6946/7/1253   | fructose-1,6-bisphosphatase 2  | 291290927 | NP_00116745 | 69.21    | 27.83   | 53.61   | 139.93  | 77.91  | 72.96   | 86.99    | 81.12  | 121.4   | 5.16    | 4.05    | 4.34   |
| 2-3.c34474/1/2219  | --                             | --        | --          | 0        | 4.71    | 0.08    | 2.91    | 1.99   | 4.32    | 6.32     | 2.95   | 1.83    | 0       | 0       | 0      |
| 3-6.c15068/1/3041  | acetyl-CoA acetyltransferase   | 148234082 | NP_00108602 | 1.67     | 16.18   | 19.21   | 13.24   | 13.49  | 15.02   | 0.79     | 0.15   | 10.94   | 0.77    | 0.51    | 0.35   |
| 1-2.c51338/3/1294  | vigilin [Xenopus (Silurana) tr | 55742112  | NP_00100685 | 10.47    | 11.85   | 0.99    | 1.51    | 0.56   | 4.77    | 135.7    | 81.9   | 11.14   | 76.61   | 193.93  | 194.79 |
| 2-3.c33216/1/4581  | PREDICTED: beta-enolase [      | 637381761 | XP_00812393 | 2.18     | 0       | 5.07    | 10.95   | 9.1    | 2.19    | 13.46    | 1.91   | 14.54   | 0       | 0       | 0      |
| 1-2.c25028/1/5817  | PREDICTED: creatine kinase     | 852796670 | XP_01288811 | 20869.62 | 2089.09 | 1.04    | 0.47    | 0      | 0.42    | 19933.25 | 0.24   | 0       | 7346.36 | 6179.93 | 0      |
| 3-6.c2358/17/3000  | PREDICTED: telethonin [Xe      | 301622194 | XP_00294041 | 18       | 7.57    | 37.91   | 3.97    | 18.34  | 17.09   | 2.02     | 9.6    | 5.88    | 0.14    | 0.16    | 0      |
| 2-3.c16215/3/1978  | PREDICTED: acetylcholinest     | 512876899 | XP_00491915 | 4.66     | 0.61    | 6.5     | 2.66    | 3.73   | 3.74    | 1.75     | 1.69   | 3.63    | 0       | 0       | 0      |
| 2-3.c15308/1/1962  | PREDICTED: nicotinamide r      | 874470990 | XP_01295408 | 6.58     | 7.97    | 3.72    | 2.8     | 4.17   | 5.56    | 0.11     | 5.2    | 12.04   | 0       | 0.09    | 0      |
| 1-2.c26248/1/1585  | PREDICTED: protoporphyrin      | 512881338 | XP_00294247 | 0        | 0       | 0       | 0       | 0      | 0       | 0        | 0      | 0       | 12.01   | 9.08    | 7.1    |
| 1-2.c44528/1/1874  | --                             | --        | --          | 0.64     | 0       | 0       | 0       | 0      | 0       | 3.36     | 2.18   | 0       | 33.73   | 36.97   | 16.47  |
| 1-2.c18465/1/1411  | PREDICTED: A-kinase anch       | 602626968 | XP_00742043 | 3.68     | 11.65   | 0       | 2.36    | 6.88   | 5.95    | 0        | 0      | 2.92    | 0       | 0       | 0      |
| 2-3.c11746/1/2616  | Citrate synthase, mitochondri  | 808865946 | KKF16719.1  | 42.56    | 0       | 0       | 0       | 0      | 0       | 0        | 0      | 26.63   | 1.82    | 10.49   | 10.14  |
| 1-2.c43556/1/1538  | --                             | --        | --          | 2        | 12.21   | 5.47    | 6.05    | 9.39   | 6.88    | 0        | 0      | 6.25    | 0       | 0       | 0      |
| 1-2.c44518/1/1720  | --                             | --        | --          | 2.21     | 0       | 0       | 0       | 0      | 0.55    | 1.25     | 0      | 0       | 29.56   | 18.43   | 18.38  |
| 1-2.c12626/2/1462  | --                             | --        | --          | 3.92     | 21.36   | 10.49   | 9.86    | 5.3    | 15.55   | 3.49     | 6.05   | 6.44    | 0       | 0       | 0.49   |
| 1-2.c1223/40/1327  | PREDICTED: actin, alpha ca     | 803091489 | XP_00401102 | 224.23   | 12.37   | 619.46  | 352.43  | 580.95 | 484.24  | 363.91   | 721.37 | 347.33  | 42.2    | 10.63   | 23.87  |
| 2-3.c44884/40/2239 | PREDICTED: kelch-like prot     | 301610740 | XP_00293485 | 76.14    | 12.51   | 82.4    | 37.8    | 95.58  | 107.87  | 30.33    | 38.81  | 69.39   | 2.51    | 3.6     | 6.02   |
| 2-3.c39915/1/2371  | PREDICTED: flotillin-2 isof    | 847099593 | XP_01281225 | 8.62     | 27.84   | 7.36    | 3.45    | 9.33   | 7.7     | 5.58     | 7.48   | 2.94    | 0       | 0       | 0.19   |
| 2-3.c43037/1/2288  | --                             | --        | --          | 17.61    | 16.61   | 13.98   | 8.31    | 7.24   | 13.84   | 7.29     | 6.26   | 7.99    | 0.62    | 0.31    | 0      |
| 2-3.c16891/1/2128  | PREDICTED: uncharacterize      | 530592326 | XP_00528975 | 0        | 0       | 0       | 0       | 0      | 0       | 0        | 0      | 0.9     | 3.53    | 7.33    | 7.79   |
| 1-2.c25522/1/1601  | PREDICTED: myosin-4 [Xet       | 847156920 | XP_01282446 | 0.49     | 1.67    | 1.62    | 0.72    | 0.46   | 0.29    | 4.36     | 1.14   | 0.39    | 28.4    | 29.41   | 70.25  |
| 2-3.c21951/2/2219  | periostin precursor [Xenopus   | 163915007 | NP_00110637 | 26.67    | 82.15   | 33.2    | 33.17   | 54.99  | 59.41   | 46.04    | 36.37  | 41.72   | 5.6     | 1.75    | 0.5    |
| 2-3.c41442/1/1951  | RecName: Full=Sarcoplasmic     | 9789732   | Q92105.1    | 1045.21  | 200.73  | 2940.85 | 1705.14 | 2139.5 | 1133.41 | 188.55   | 597.12 | 1852.88 | 0       | 0       | 250.74 |
| 1-2.c32640/1/1469  | --                             | --        | --          | 0        | 0       | 0       | 0       | 0      | 0       | 4.13     | 0      | 5.04    | 14.94   | 26.23   | 6.22   |
| 2-3.c19708/4/2538  | PREDICTED: kelch-like prot     | 301610740 | XP_00293485 | 1.83     | 0.39    | 1.81    | 1.23    | 2.37   | 3.92    | 0.98     | 0.61   | 1.28    | 0       | 0       | 0      |
| 1-2.c14510/2/1730  | sestrin-1 [Xenopus (Silurana)  | 194018650 | NP_00112341 | 0        | 0       | 0.16    | 0       | 0      | 0       | 0        | 0.66   | 0       | 22.92   | 35.43   | 9.06   |
| 1-2.c40780/1/4598  | fructose-1,6-bisphosphatase 2  | 291290927 | NP_00116745 | 13.49    | 1.02    | 21.83   | 16.06   | 11.31  | 14.44   | 4.68     | 10.76  | 12.4    | 0       | 0       | 0.43   |
| 1-2.c46255/1/1557  | succinyl-CoA ligase [ADP-fo    | 45361311  | NP_989233.1 | 0        | 0       | 0       | 0       | 0      | 0       | 0        | 0      | 0       | 12.55   | 6.5     | 6.75   |
| 2-3.c61326/1/2590  | PREDICTED: ovostatin-like      | 512878734 | XP_00491941 | 3.27     | 3.11    | 0       | 0       | 0      | 4.61    | 7.02     | 0.89   | 4.95    | 61.36   | 87.06   | 143.69 |
| 1-2.c40995/1/1534  | PREDICTED: diacylglycerol      | 301610039 | XP_00293457 | 3.28     | 0       | 0.2     | 0       | 0      | 0       | 0.19     | 0      | 2.75    | 11.66   | 9.15    | 8.87   |
| 2-3.c12088/1/2321  | PREDICTED: band 4.1-like p     | 847168900 | XP_01280815 | 0        | 3.23    | 0       | 0       | 0      | 0       | 0        | 0      | 0       | 14.03   | 21.66   | 5.14   |
| 1-2.c7050/1/1519.1 | PREDICTED: glucosylceram       | 557017449 | XP_00600913 | 0        | 2.24    | 1.96    | 3       | 0      | 0.96    | 2.18     | 3.44   | 7.43    | 96.33   | 114.04  | 75.22  |
| 1-2.c19245/2/1322  | leucine aminopeptidase 3 [Xe   | 148228748 | NP_00108465 | 0        | 0       | 0       | 0       | 0      | 0       | 5.03     | 0      | 0.56    | 12.18   | 5.88    | 14.25  |
| 2-3.c40476/1/2204  | PREDICTED: protein Red, p      | 706108693 | XP_01020783 | 2.4      | 15.74   | 3.89    | 0.85    | 4.38   | 5.43    | 0.45     | 0      | 3.29    | 0       | 0       | 0      |
| 1-2.c51161/3/1577  | RecName: Full=Nucleolar R      | 765680610 | Q9DF36.2    | 88.19    | 398.23  | 87.82   | 68.7    | 55.91  | 94      | 82       | 62.49  | 115.31  | 0       | 0       | 9.82   |
| 3-6.c15588/1/3291  | PREDICTED: nebulin isofon      | 847166495 | XP_0128266C | 0.14     | 0       | 0       | 7.72    | 0.91   | 9.7     | 4.98     | 16.26  | 0       | 0       | 0       | 0      |
| 2-3.c23106/2/2177  | --                             | --        | --          | 0        | 0.09    | 0       | 0       | 0      | 0       | 6.96     | 0      | 6.34    | 8.92    | 19.45   | 14.69  |
| 1-2.c25537/1/1315  | PREDICTED: lysine (K)-spe      | 847155363 | XP_01282414 | 0        | 7.03    | 1.83    | 0.39    | 0      | 0       | 2.2      | 0      | 3.31    | 18.57   | 18.85   | 27.24  |
| 2-3.c21101/1/2607  | PREDICTED: ubiquitin carbo     | 514753716 | XP_00502143 | 6.95     | 2.8     | 1.22    | 2.63    | 2.82   | 1.69    | 1.01     | 2.59   | 2.35    | 0       | 0       | 0      |

|                    |                                                                  |           |             |         |        |         |         |         |         |         |         |         |        |        |        |
|--------------------|------------------------------------------------------------------|-----------|-------------|---------|--------|---------|---------|---------|---------|---------|---------|---------|--------|--------|--------|
| 2-3.c27108/1/2172  | ubiquitin-conjugating enzyme                                     | 56118358  | NP_00100795 | 0.71    | 0      | 0.92    | 0       | 0       | 0       | 0       | 0       | 0.86    | 2.71   | 17.39  | 14.31  |
| 1-2.c49494/1/1738  | PREDICTED: protein phosphatase 2B                                | 512830294 | XP_00491303 | 7.64    | 0.88   | 6.78    | 8.45    | 12.31   | 5.7     | 2.06    | 0       | 6.26    | 0.39   | 0.34   | 0      |
| 2-3.c53489/1/1896  | PREDICTED: ras-related protein                                   | 612007529 | XP_00136477 | 15.02   | 5.48   | 6.57    | 10.33   | 11.2    | 5.75    | 0       | 10.06   | 10.27   | 0.55   | 0.28   | 0      |
| 1-2.c23510/3/1343  | PREDICTED: actin, cytoplasmic                                    | 724842428 | XP_01036525 | 11.09   | 1.03   | 24.58   | 16.84   | 22.18   | 20.47   | 12.43   | 18.37   | 18.95   | 0.9    | 0.9    | 0.42   |
| 2-3.c56087/1/2037  | alpha-actinin-3 [Xenopus laevis]                                 | 213983245 | NP_00113551 | 230.02  | 46.5   | 391.4   | 208.04  | 341.4   | 345.45  | 109.9   | 233.72  | 150.25  | 1.54   | 6.44   | 36.45  |
| 2-3.c14676/5/2209  | solute carrier family 37 (glucocorticoid-inducible)              | 147901932 | NP_00108340 | 1.76    | 4.38   | 3.94    | 0.87    | 5.44    | 5.21    | 1.33    | 0.56    | 6.53    | 0      | 0      | 0      |
| 2-3.c17718/19/2251 | DDX5 protein [Xenopus laevis]                                    | 52430509  | AAH82849.1  | 287.85  | 391.34 | 148     | 189.68  | 203.46  | 180.66  | 380.6   | 255.28  | 211.53  | 35.3   | 0      | 0      |
| 1-2.c34020/1/1572  | --                                                               | --        | --          | 9.89    | 0      | 0       | 0       | 0       | 0       | 0       | 0       | 4.44    | 10.3   | 5.01   | 11.92  |
| 1-2.c20938/1/1363  | uncharacterized protein LOC166158248                             | 166158248 | NP_00110750 | 0       | 0.69   | 3.05    | 0       | 2.19    | 1.15    | 3.22    | 0       | 4.96    | 67.08  | 130.34 | 64.12  |
| 3-6.c14436/1/4046  | delta-1-pyrroline-5-carboxylate synthetase                       | 156717284 | NP_00109618 | 6.76    | 6      | 15.33   | 10.76   | 7.92    | 10.61   | 3.27    | 3.13    | 7.25    | 0.09   | 0.15   | 0.58   |
| 1-2.c40095/1/1613  | pinyin [Xenopus laevis]                                          | 54020926  | NP_00100570 | 0       | 10.77  | 0.89    | 2.43    | 4.61    | 4.44    | 4.74    | 0       | 0       | 0      | 0      | 0      |
| 3-6.c7531/1/3246.1 | von Willebrand factor A domain                                   | 148228482 | NP_00107996 | 1.2     | 0      | 1.95    | 0.84    | 2.84    | 3.43    | 0       | 2.55    | 0.79    | 0      | 0      | 0      |
| 2-3.c27889/1/1831  | hypothetical protein L798_08                                     | 646642601 | KDQ71589.1  | 2.91    | 0      | 1.99    | 0       | 0       | 0       | 12.87   | 0.17    | 2.45    | 28.93  | 82.32  | 21.84  |
| 1-2.c45291/1/1938  | --                                                               | --        | --          | 0       | 1.85   | 0.79    | 5.88    | 2       | 3.88    | 0       | 1.32    | 0       | 0      | 0      | 0      |
| 2-3.c13997/3/2183  | PREDICTED: ankyrin repeat domain                                 | 512839176 | XP_00293505 | 14.31   | 0      | 6.88    | 8.74    | 14.47   | 2.23    | 5.36    | 13.59   | 17.25   | 0      | 0      | 0      |
| 1-2.c29105/1/1436  | --                                                               | --        | --          | 15      | 7.38   | 3.69    | 0       | 0.94    | 1.58    | 21.13   | 0       | 11.37   | 63.41  | 114.56 | 66.3   |
| 1-2.c5549/1/1526.1 | --                                                               | --        | --          | 2.34    | 13.65  | 3.53    | 4.13    | 3.8     | 10.31   | 1.92    | 3.46    | 4.64    | 0      | 0      | 0      |
| 1-2.c52297/1/1366  | RecName: Full=Transitional endoplasmic reticulum chaperone       | 257051069 | P23787.3    | 0       | 0      | 0       | 0       | 0       | 0       | 18.37   | 0       | 0       | 300.76 | 329.7  | 0      |
| 2-3.c60084/1/4948  | aconitase 2, mitochondrial [Xenopus laevis]                      | 147904130 | NP_00108626 | 36.94   | 7.67   | 28.52   | 21.85   | 42.17   | 17.35   | 20.38   | 14.83   | 29.7    | 4.02   | 0      | 0      |
| 1-2.c51003/1/1895  | leucine-rich repeat-containing protein                           | 194332463 | NP_00112373 | 6.59    | 9.51   | 4.86    | 9.27    | 10.94   | 11.48   | 0       | 5.45    | 0       | 0.28   | 0.87   | 0      |
| 2-3.c47658/1/2469  | inner-ear cytochrome b [Rana temporaria]                         | 6980088   | AAF34720.1  | 66.19   | 54.18  | 41.31   | 35.96   | 88.57   | 29.04   | 81.67   | 52.36   | 17.02   | 0      | 0      | 1.07   |
| 1-2.c25523/1/1409  | HMG box-containing protein                                       | 147906895 | NP_00108595 | 0       | 0      | 0       | 0       | 0       | 0       | 12.33   | 0.93    | 0       | 7.93   | 13.14  | 6.15   |
| 1-2.c22082/2/1301  | PREDICTED: laminin subunit gamma-1                               | 512844752 | XP_00293635 | 0       | 2.57   | 0       | 0       | 0       | 0       | 7.71    | 0       | 0       | 15.61  | 12.46  | 3.18   |
| 1-2.c36348/1/4797  | isocitrate dehydrogenase 2 (NADP+ dependent)                     | 148227256 | NP_00108032 | 489.78  | 319.59 | 648.73  | 579.65  | 499.07  | 427.53  | 291.97  | 446.8   | 429.66  | 26.35  | 18.17  | 43.68  |
| 1-2.c50902/15/1572 | prosaposin (variant Gaucher disease type 1)                      | 148236249 | NP_00108761 | 58.79   | 0      | 9.33    | 0       | 0       | 2.92    | 10.69   | 26.66   | 5.41    | 50.02  | 40.5   | 83.39  |
| 1-2.c14996/1/1493  | potassium channel, inwardly rectifying subfamily A member 1      | 156717570 | NP_00109632 | 1.8     | 0      | 1.4     | 0.27    | 0       | 0       | 0.69    | 1.66    | 0.02    | 18.16  | 26.93  | 7.94   |
| 1-2.c15349/36/1328 | actin, alpha cardiac muscle 2                                    | 45361557  | NP_989355.1 | 129.84  | 12.23  | 357.27  | 258.1   | 350.9   | 279.16  | 179.78  | 322.59  | 205.02  | 24.5   | 10.59  | 20.35  |
| 1-2.c17933/1/1363  | MGC83940 protein [Xenopus laevis]                                | 50925006  | AAH79747.1  | 4.37    | 0      | 0       | 1.57    | 0       | 0       | 1.34    | 1.52    | 0.79    | 59.81  | 46.17  | 26.64  |
| 1-2.c40653/1/1299  | periostin precursor [Xenopus laevis]                             | 163915007 | NP_00110637 | 20.83   | 56.09  | 85.83   | 27.84   | 53.2    | 60.69   | 22.56   | 14.88   | 14.67   | 2.21   | 0      | 4.48   |
| 2-3.c19079/7/2087  | ARP2 actin-related protein 2                                     | 15778930  | AAH14546.1  | 2.02    | 1.81   | 3.98    | 3.64    | 0.72    | 4.29    | 0.49    | 0.73    | 4.58    | 0      | 0      | 0      |
| 2-3.c24538/2/2210  | --                                                               | --        | --          | 0.2     | 2.02   | 2.85    | 0       | 0       | 0       | 0       | 0       | 2.93    | 5.07   | 7.59   | 4.62   |
| 2-3.c28684/2/2591  | PREDICTED: nebulin isoform 1                                     | 847166510 | XP_01282661 | 21.62   | 7.24   | 0.77    | 34.88   | 57.68   | 66.22   | 41.63   | 51.18   | 0       | 9.78   | 0      | 0      |
| 2-3.c14691/1/2173  | epiphysean precursor [Xenopus laevis]                            | 54020763  | NP_00100562 | 5.94    | 15.61  | 16.87   | 15.48   | 5.21    | 9.61    | 11.74   | 10.15   | 16.72   | 0      | 0      | 0      |
| 3-6.c17085/1/2740  | RecName: Full=Voltage-dependent calcium channel subunit alpha-1D | 46576355  | O57483.1    | 34.82   | 12.68  | 45.97   | 31.05   | 43.05   | 48.8    | 17.64   | 29.83   | 28.53   | 3.93   | 0.82   | 2.37   |
| 3-6.c17714/30/2965 | eukaryotic translation initiation factor 4E                      | 148237458 | NP_00108006 | 5.17    | 0      | 7.06    | 6.84    | 11.86   | 7.49    | 3.15    | 8.7     | 5.37    | 0      | 0      | 0.97   |
| 2-3.c62766/2/2114  | LOC398139 protein [Xenopus laevis]                               | 46329514  | AAH68910.1  | 88.34   | 15.7   | 65.33   | 33.87   | 72.04   | 31.7    | 41.73   | 56.86   | 66.96   | 0      | 0.01   | 5.45   |
| 2-3.c6856/1/2093.1 | PREDICTED: tectonic-3 [Xenopus laevis]                           | 512883714 | XP_00294175 | 0       | 0      | 0       | 0       | 0       | 0.08    | 1.42    | 0       | 0.83    | 12.46  | 15.18  | 11.47  |
| 1-2.c34997/6/1434  | tubulin beta chain-like [Scleroglymma sp.]                       | 820146195 | KKX13732.1  | 0       | 0      | 0       | 0       | 0       | 0       | 5.58    | 0       | 0       | 44.89  | 12.35  | 16.6   |
| 3-6.c2744/8/3086   | thrombospondin-4 precursor [Xenopus laevis]                      | 118404528 | NP_00107267 | 7.17    | 27.5   | 10.72   | 7.06    | 6       | 7.13    | 4.44    | 9.16    | 10.47   | 0      | 0.56   | 0.25   |
| 2-3.c1438/35/2389  | ADAM metalloproteinase domain                                    | 90968576  | NP_00103510 | 12.37   | 0.27   | 9.9     | 12.23   | 17.55   | 16.21   | 0       | 5.49    | 0       | 0.08   | 2.48   | 0      |
| 3-6.c14981/1/4219  | PREDICTED: A-kinase anchoring protein 1                          | 512820714 | XP_00293685 | 5.72    | 3.45   | 2.72    | 3       | 6.09    | 3.57    | 0.97    | 0.97    | 1.72    | 0.27   | 0      | 0.15   |
| 2-3.c29964/1/2289  | --                                                               | --        | --          | 562.56  | 450.35 | 510.7   | 782.64  | 515.88  | 279.98  | 912.63  | 506.28  | 521.42  | 37.89  | 27.35  | 17.64  |
| 2-3.c16223/1/1964  | PREDICTED: nebulin isoform 2                                     | 847166506 | XP_01282661 | 0.74    | 9.01   | 0       | 6.24    | 7.66    | 3.49    | 1.16    | 1.47    | 0.75    | 0      | 0      | 0.3    |
| 1-2.c30262/1/1207  | PREDICTED: F-actin-capping protein                               | 525020623 | XP_00505782 | 151.11  | 106.44 | 239.51  | 139.16  | 181.89  | 145.56  | 93.89   | 167.47  | 131.51  | 0      | 0      | 25.27  |
| 2-3.c20371/1/2460  | --                                                               | --        | --          | 0.79    | 2.44   | 0       | 0       | 0       | 0       | 0       | 1.32    | 2.84    | 4.57   | 6.39   | 0      |
| 2-3.c43363/1/2033  | actin, alpha cardiac muscle 2                                    | 45361557  | NP_989355.1 | 4682.12 | 983.69 | 8484.87 | 2690.54 | 5710.56 | 5954.48 | 4462.68 | 8821.38 | 4039.68 | 325.36 | 102.42 | 476.74 |
| 1-2.c38658/1/1657  | PREDICTED: protein PFC07                                         | 556961274 | XP_00599098 | 11.43   | 3.6    | 36.99   | 19.8    | 34.59   | 116.79  | 25.56   | 21.34   | 34.51   | 0      | 0      | 0      |
| 2-3.c11447/13/2042 | cell division cycle 23 [Xenopus laevis]                          | 147903791 | NP_00107985 | 2.49    | 7.72   | 1.95    | 0.76    | 3.39    | 4.61    | 0.54    | 1.39    | 0       | 0      | 0      | 0      |
| 1-2.c5599/1/1519   | --                                                               | --        | --          | 0       | 0      | 0       | 0       | 0       | 0       | 0       | 0       | 0       | 10.37  | 10.89  | 4.36   |
| 1-2.c10612/8/1750  | uncharacterized protein LOC148237928                             | 148237928 | NP_00109116 | 21.4    | 15.22  | 28.34   | 32.62   | 36.34   | 58.35   | 19.92   | 40.44   | 26.73   | 2.27   | 2.77   | 2.35   |
| 1-2.c43666/1/1083  | myosin heavy chain, partial I [Xenopus laevis]                   | 4249695   | AAD13769.1  | 0       | 0      | 0       | 0       | 0       | 0       | 0       | 16.07   | 0       | 248.03 | 320.59 | 7.23   |
| 2-3.c24232/1/2578  | PREDICTED: protein phosphatase 2B                                | 512830294 | XP_00491303 | 6.51    | 1.37   | 7.37    | 7.08    | 9.68    | 5.37    | 3.24    | 7.26    | 6.91    | 0      | 0.51   | 0.35   |
| 2-3.c49637/1/2329  | fibronectin precursor [Xenopus laevis]                           | 148237139 | NP_00108127 | 7.11    | 50.32  | 2.69    | 2.15    | 2.9     | 4.72    | 14.95   | 2.26    | 3.3     | 147.82 | 171.57 | 175.82 |
| 1-2.c24795/2/1617  | PREDICTED: alpha-actinin-1                                       | 558140029 | XP_00611831 | 171.94  | 30.27  | 215.4   | 158.34  | 193.71  | 195.55  | 27.41   | 168.95  | 35.81   | 0      | 0      | 31.41  |
| 1-2.c40888/1/1636  | LOC733250 protein [Xenopus laevis]                               | 66910737  | AAH97624.1  | 0       | 0      | 0       | 0       | 0       | 0.21    | 0       | 0       | 5.15    | 53.57  | 17.69  | 109.85 |
| 1-2.c36290/1/1435  | PREDICTED: delta(3,5)-Delta                                      | 597740413 | XP_00723236 | 0       | 0      | 0.03    | 0       | 0       | 4.06    | 0       | 0.75    | 8.62    | 13.03  | 8.52   | 0      |
| 2-3.c56525/1/1890  | 3-oxoacid CoA transferase 1                                      | 148222725 | NP_00108324 | 17.87   | 46.43  | 33.29   | 25.72   | 20.26   | 50.23   | 24.97   | 20.78   | 16.56   | 2.19   | 1.67   | 1.5    |
| 2-3.c50653/1/2108  | E3 ubiquitin-protein ligase RING1B                               | 47575796  | NP_00100124 | 0       | 0      | 0       | 0       | 0       | 0       | 0       | 0       | 0       | 27.59  | 40.39  | 4.4    |

|                    |                                  |           |             |        |        |        |        |        |        |        |        |        |        |         |       |
|--------------------|----------------------------------|-----------|-------------|--------|--------|--------|--------|--------|--------|--------|--------|--------|--------|---------|-------|
| 1-2.c5848/1/1483   | PREDICTED: protein transp        | 847087089 | XP_01281626 | 0      | 0      | 0      | 0      | 0      | 0      | 4.12   | 0      | 0      | 7.37   | 6.05    | 10.77 |
| 3-6.e13049/2/2759  | --                               | --        | --          | 26.3   | 1.12   | 0      | 58.6   | 25.2   | 7.36   | 9.69   | 37.75  | 26.96  | 0      | 0       | 0     |
| 1-2.c37257/2/1361  | --                               | --        | --          | 7.84   | 0      | 0.14   | 0      | 2.5    | 1.13   | 0      | 0      | 4.16   | 83.56  | 71.02   | 68.4  |
| 3-6.e12894/25/3147 | RecName: Full=DNA replica        | 108935850 | P55861.2    | 2.35   | 36.54  | 2.02   | 1.57   | 4.52   | 8.07   | 0.2    | 1.86   | 1.71   | 0      | 0       | 0.1   |
| 2-3.e22409/1/2005  | phosphatidylinositol 4-kinase    | 156717328 | NP_00109620 | 0      | 0      | 0      | 0      | 0      | 2.69   | 1.75   | 0      | 0      | 8.44   | 10.32   | 1.94  |
| 1-2.e2867/13/1632  | PREDICTED: L-lactate dehy        | 675698937 | XP_00275513 | 242.11 | 10.06  | 376.53 | 436.62 | 538.96 | 209.18 | 182.51 | 187.83 | 444.14 | 0.06   | 0       | 74.59 |
| 1-2.e20496/1/1589  | adult beta globin [Rhacophon     | 451957813 | BAM84268.1  | 0      | 0      | 0.24   | 0.6    | 0.14   | 0.16   | 8.66   | 0.13   | 0      | 153.03 | 197.36  | 626.1 |
| 1-2.e13220/2/1481  | solute carrier family 16 (mon    | 148232306 | NP_00108030 | 0      | 0.13   | 0      | 0      | 0      | 0      | 6.5    | 0      | 0      | 4.06   | 12.76   | 6.51  |
| 2-3.e55328/1/2089  | PREDICTED: proteoglycan 4        | 734645154 | XP_01075165 | 67.81  | 40.4   | 80.63  | 51.2   | 61.13  | 94.95  | 49.32  | 50.12  | 59.56  | 4.93   | 3.18    | 5.3   |
| 3-6.e4810/1/4152   | PREDICTED: myb-binding f         | 512820645 | XP_00491176 | 2.5    | 4.26   | 1.49   | 1.78   | 2.03   | 4.45   | 1.07   | 1.34   | 1.09   | 0      | 0.18    | 0.04  |
| 1-2.e28288/1/1446  | --                               | --        | --          | 1.4    | 2.12   | 0.31   | 0      | 0.53   | 0.94   | 0      | 1.12   | 1.52   | 39.33  | 40.59   | 25.94 |
| 1-2.c32534/2/1543  | PREDICTED: actin, cytoplas       | 826278329 | XP_01249437 | 0.31   | 0.13   | 0      | 0      | 0      | 0      | 0.06   | 0      | 0      | 10.77  | 4.09    | 8.77  |
| 1-2.e45696/1/1693  | LOC100135355 protein [Xen        | 163915685 | AAI57657.1  | 0      | 0      | 0      | 0      | 0      | 0      | 4.27   | 0      | 2.64   | 9.62   | 6.88    | 3.5   |
| 1-2.e7021/1/1558   | secretory carrier membrane p     | 148225835 | NP_00108753 | 0.01   | 0      | 0      | 0      | 0      | 0.02   | 4.01   | 0      | 1.38   | 3.66   | 10.87   | 8.03  |
| 1-2.e2075/20/1434  | actin, alpha cardiac muscle 2    | 45361557  | NP_989355.1 | 3.48   | 1.37   | 33.39  | 18.9   | 18.18  | 29.31  | 32.3   | 29.46  | 12.35  | 0      | 1.47    | 1.75  |
| 1-2.e24448/3/1348  | --                               | --        | --          | 4.03   | 4.18   | 0      | 4.81   | 7.59   | 1.99   | 9.1    | 0      | 0      | 0      | 0       | 0     |
| 2-3.e50059/1/2712  | PREDICTED: myosin-4 [Xer         | 847156920 | XP_01282446 | 0      | 0      | 86     | 28.08  | 32.95  | 0.43   | 118.58 | 0      | 0      | 0      | 0       | 0     |
| 1-2.e16836/1/1318  | --                               | --        | --          | 3.27   | 4.63   | 0      | 0      | 0      | 2.36   | 8.61   | 1.27   | 3.76   | 48.37  | 62.99   | 32.38 |
| 1-2.e49017/1/1386  | --                               | --        | --          | 4.81   | 0      | 1.11   | 1.04   | 0      | 0      | 2.86   | 0      | 0      | 37.53  | 23.57   | 27.31 |
| 3-6.e2935/9/3663   | PREDICTED: bifunctional m        | 768353287 | XP_01157358 | 22.16  | 36.06  | 35.43  | 11.6   | 19.07  | 12.03  | 6.76   | 18.03  | 12.89  | 0.59   | 0.06    | 1.74  |
| 1-2.c51832/2/1365  | legumain precursor [Xenopus      | 54020950  | NP_00100572 | 0      | 0      | 0      | 0      | 0      | 0      | 0      | 0      | 0      | 181.34 | 203.8   | 0     |
| 1-2.e10620/16/1316 | Unknown (protein for IMAG        | 62132943  | AAH92152.1  | 5.35   | 12.09  | 4.29   | 4.75   | 6.05   | 2.95   | 1.47   | 1.08   | 0.68   | 0      | 0       | 0     |
| 1-2.e16997/1/2138  | PREDICTED: actin, alpha ca       | 803091489 | XP_00401102 | 68.49  | 6.61   | 218.37 | 175.53 | 200    | 176.64 | 118.03 | 200.52 | 142.53 | 15.36  | 7.8     | 15.42 |
| 1-2.e12272/1/1850  | PREDICTED: iron-sulfur clu       | 859911141 | XP_00477417 | 0      | 6.08   | 6.73   | 5.53   | 7.38   | 4.2    | 0      | 0.05   | 3.03   | 0      | 0       | 0.33  |
| 3-6.e6143/1/2855   | glycogen phosphorylase, brai     | 50054411  | NP_00100190 | 8.32   | 8.28   | 3.6    | 31.69  | 17.07  | 7.65   | 17.95  | 9.59   | 14.46  | 0      | 0       | 0.46  |
| 1-2.e49150/2/1774  | PREDICTED: monocarboxyl          | 704293877 | XP_01016065 | 6.87   | 0      | 13.63  | 29.58  | 31.45  | 10.12  | 4.27   | 6.92   | 0.17   | 0      | 4.7     | 0     |
| 2-3.e31481/105/266 | Unknown (protein for IMAG        | 115528309 | AAI24911.1  | 4.22   | 14.27  | 6.08   | 2.49   | 4.99   | 4.07   | 12.61  | 3.42   | 2.86   | 0.27   | 0       | 0     |
| 2-3.e36943/1/2136  | replication termination factor   | 148236615 | NP_00108270 | 36.06  | 35.33  | 19.78  | 21.93  | 21.56  | 7.98   | 15.38  | 17.37  | 17.81  | 0      | 0       | 1.84  |
| 2-3.e27148/2/2441  | --                               | --        | --          | 13.61  | 3.76   | 14.59  | 11.63  | 9.95   | 7.84   | 3.7    | 4.65   | 6.5    | 1.22   | 0.26    | 0.06  |
| 1-2.e34721/1/1320  | PREDICTED: translocation f       | 847130489 | XP_01281900 | 6.06   | 0      | 4.67   | 1.93   | 4.29   | 6.82   | 0.89   | 0      | 5.26   | 0      | 0       | 0     |
| 1-2.e20802/1/1590  | --                               | --        | --          | 0      | 0      | 0      | 0      | 0      | 0      | 0      | 0      | 0      | 17.53  | 23.67   | 25.68 |
| 2-3.e6984/2/2518   | PREDICTED: leucine-rich re       | 847138470 | XP_01282083 | 0      | 0.43   | 0      | 0      | 0      | 0      | 0      | 0      | 0      | 4.22   | 2.65    | 5.42  |
| 1-2.e26527/1/1806  | PREDICTED: reticulon-4 iso       | 847127975 | XP_01281854 | 41.66  | 43.93  | 125.12 | 82.02  | 100.98 | 162.77 | 82.76  | 96.87  | 109.54 | 7.52   | 2.32    | 13.45 |
| 1-2.e43459/1/1591  | --                               | --        | --          | 2.16   | 1.81   | 4.43   | 3.03   | 3.61   | 8.86   | 0.86   | 1.56   | 1.03   | 0      | 0       | 0.14  |
| 2-3.e32459/1/2613  | --                               | --        | --          | 5.45   | 28.25  | 4.81   | 6.66   | 4.95   | 10.31  | 0.52   | 1.46   | 4.02   | 0.14   | 0.32    | 0.43  |
| 2-3.e24500/2/2265  | --                               | --        | --          | 2.01   | 3.15   | 4.16   | 4.26   | 3.88   | 6.09   | 1.92   | 5.27   | 2.11   | 0.35   | 0       | 0     |
| 1-2.e4762/2/1399   | 26S proteasome non-ATPase        | 62751452  | NP_00101581 | 0      | 4.64   | 0      | 0.19   | 0      | 0      | 2.01   | 0      | 0.51   | 54.26  | 9.22    | 37.65 |
| 1-2.e47809/96/1627 | uncharacterized protein LOC:     | 89886093  | NP_988922.2 | 3.06   | 16.49  | 0.11   | 10.69  | 2.99   | 4.34   | 0      | 3.32   | 3.95   | 0.03   | 0       | 0     |
| 1-2.e33227/1/1253  | PREDICTED: transcription ii      | 847108696 | XP_01281408 | 0      | 0      | 0      | 0      | 0      | 0      | 0      | 1.36   | 0      | 7.7    | 12.21   | 6.58  |
| 1-2.e13222/2/1615  | PREDICTED: NAD kinase 2          | 847088841 | XP_01282125 | 0.09   | 5.08   | 1.69   | 0.22   | 0      | 0      | 2.77   | 0.31   | 2.34   | 14.15  | 16.83   | 5     |
| 1-2.e5722/4/1362   | protein disulfide isomerase fa   | 147906274 | NP_00108664 | 0.78   | 0      | 4.96   | 1.45   | 0      | 0      | 13.68  | 0.5    | 3.87   | 49.02  | 41.37   | 15.86 |
| 2-3.e2231/9/2133   | phospholemman precursor [X       | 58332490  | NP_00101132 | 16.01  | 20.68  | 19.9   | 16.91  | 24.17  | 52.69  | 6.49   | 5.28   | 17.4   | 0.34   | 0.38    | 3.2   |
| 2-3.e36236/1/2607  | trimeric intracellular cation cl | 148237167 | NP_00107953 | 124.65 | 224.65 | 299.88 | 214.65 | 234.96 | 559.51 | 214.96 | 228.21 | 254.04 | 25.09  | 9.49    | 30.98 |
| 1-2.e5196/1/1365   | PREDICTED: DDB1- and CI          | 847086461 | XP_01281478 | 1.01   | 1.17   | 0      | 4.14   | 0      | 0      | 15     | 6.36   | 14.58  | 70.93  | 92.56   | 65.57 |
| 1-2.e36367/1/1496  | PREDICTED: lysyl oxidase 1       | 704337203 | XP_01017403 | 0      | 0      | 0      | 0      | 0      | 0      | 5.83   | 0.91   | 0      | 8.67   | 8.41    | 4.64  |
| 2-3.e45840/1/2051  | --                               | --        | --          | 0      | 23.27  | 0      | 4.18   | 11.7   | 13.54  | 10.09  | 6.55   | 10.6   | 0      | 1.61    | 0     |
| 2-3.e13368/1/1826  | PREDICTED: tropomyosin a         | 573881544 | XP_00662896 | 0      | 30.98  | 0      | 0      | 0      | 0      | 0      | 0      | 19.56  | 96.58  | 91.75   | 0     |
| 1-2.e34979/1/10400 | PREDICTED: LOW QUALI             | 637377851 | XP_00812323 | 0.65   | 0      | 0      | 0.32   | 0      | 0      | 0      | 0      | 0      | 1327.4 | 1837.21 | 0.35  |
| 1-2.e7620/1/1697.1 | --                               | --        | --          | 74.29  | 14.02  | 65.29  | 25.84  | 62.17  | 63.76  | 26.61  | 38.36  | 32.29  | 4.12   | 3.46    | 0.17  |
| 1-2.e46302/1/1517  | --                               | --        | --          | 0.18   | 0      | 0.22   | 0.52   | 0.08   | 1.31   | 0.85   | 0      | 0.61   | 54     | 47.97   | 35.15 |
| 2-3.e45771/1/2261  | PREDICTED: U2 small nucl         | 301617734 | XP_00293830 | 0      | 0      | 0      | 0      | 0      | 0      | 0      | 0      | 0      | 6.22   | 8.54    | 1.83  |
| 2-3.e60918/1/2239  | PREDICTED: myomesin-1 [          | 512850290 | XP_00293895 | 12.42  | 8.13   | 40.17  | 25.11  | 28.33  | 52.86  | 19.53  | 26.34  | 30.4   | 1.61   | 0.99    | 4.16  |
| 1-2.e40211/1/4830  | glutamate oxaloacetate trans     | 333805525 | BAK26556.1  | 105.15 | 7.26   | 114.34 | 118.58 | 134.34 | 44.61  | 29.6   | 86.01  | 95.78  | 0.89   | 0       | 17.03 |
| 1-2.e29762/1/1513  | --                               | --        | --          | 0      | 0      | 0      | 0      | 0      | 0      | 2.28   | 0      | 0      | 7.98   | 13.69   | 3.05  |
| 2-3.e21792/1/2302  | PREDICTED: A-kinase anch         | 512820714 | XP_00293685 | 9.93   | 8.72   | 4.99   | 9.02   | 8.16   | 12.53  | 2.26   | 0.64   | 10.77  | 0.73   | 0.48    | 0.38  |
| 1-2.e33636/2/1343  | NADH dehydrogenase subun         | 164519190 | YP_00164887 | 68.1   | 0      | 0      | 0      | 73.91  | 65.57  | 24.83  | 71.07  | 76.86  | 0      | 0       | 0     |
| 2-3.e52048/2/2020  | mediator of RNA polymerase       | 62858965  | NP_00101697 | 0      | 0      | 0      | 0      | 0      | 1.85   | 0      | 0      | 0      | 3.78   | 6.04    | 4.77  |
| 2-3.e52576/2/2232  | myosin, heavy chain 4, skelet    | 47575800  | NP_00100124 | 5.64   | 2.64   | 526.66 | 256.87 | 131.61 | 0      | 724.52 | 80.62  | 129.96 | 0      | 0       | 0     |

|                     |                                 |           |              |         |        |         |         |         |        |        |         |         |        |        |        |
|---------------------|---------------------------------|-----------|--------------|---------|--------|---------|---------|---------|--------|--------|---------|---------|--------|--------|--------|
| 3-6.c5836/1/3573    | PREDICTED: laminin subun        | 512830498 | XP_00293314  | 0.11    | 6.64   | 0       | 1.93    | 1.07    | 0.78   | 1.46   | 0       | 2.91    | 0      | 0      | 0      |
| 1-2.c1273/14/1334   | PREDICTED: actin, alpha ca      | 803091489 | XP_00401102  | 4.42    | 0.32   | 19.59   | 14.59   | 8.34    | 14.52  | 10.76  | 16.03   | 7.55    | 0.37   | 0.15   | 0.84   |
| 2-3.c12113/1/2392   | ATPase, Ca++ transporting, s    | 147907326 | NP_001088644 | 0.24    | 4.35   | 0.62    | 0.76    | 2.34    | 2.82   | 0      | 0.07    | 0.25    | 0      | 0      | 0      |
| 3-6.c2494/7/2939    | zygotic DNA replication licet   | 113931568 | NP_001039223 | 0.48    | 15.1   | 1.15    | 0.42    | 2.49    | 3.38   | 0      | 0.36    | 0.24    | 0      | 0      | 0      |
| 1-2.c22107/2/1263   | nuclear Y/CCAAT-box bindi       | 148233547 | NP_00108380  | 3.1     | 0      | 0       | 0       | 0       | 1.2    | 0      | 3.39    | 7.12    | 7.21   | 9.21   | 9.21   |
| 2-3.c20973/1/2385   | protein-arginine deiminase ty   | 156717898 | NP_00109645  | 8.74    | 2.57   | 32.59   | 32.68   | 27.29   | 17.13  | 25.31  | 11.63   | 16.73   | 0      | 0      | 4.91   |
| 2-3.c38653/3/2392   | eukaryotic elongation factor    | 187607479 | NP_00112014  | 1.67    | 1.04   | 3.2     | 5.61    | 4.37    | 1.03   | 0.71   | 1.57    | 1.21    | 0.07   | 0      | 0      |
| 1-2.c35025/2/1409   | PREDICTED: coatomer subu        | 327281271 | XP_00322537  | 0       | 0      | 0       | 0       | 0       | 0      | 0      | 0       | 71.71   | 105.35 | 5.36   | 5.36   |
| 1-2.c4677/1/1258    | ribose-phosphate pyrophosph     | 45361007  | NP_989140.1  | 0.81    | 0      | 10.13   | 5.2     | 5.29    | 2.63   | 0      | 4.91    | 0.9     | 0      | 0      | 0      |
| 3-6.c12902/5/3256   | nuclear factor 7, brain [Xeno]  | 284009784 | NP_00116500  | 2.91    | 14.26  | 2.1     | 2.57    | 8.27    | 4.49   | 2.5    | 2.12    | 0.38    | 0.44   | 0      | 0      |
| 2-3.c39996/1/2290   | --                              | --        | --           | 0.62    | 0      | 0       | 0       | 0       | 0      | 0      | 0       | 0       | 7.26   | 11.1   | 1.95   |
| 1-2.c21069/2/1660   | MGC97489 protein [Xenopus]      | 58477438  | AAH90081.1   | 0       | 0      | 0       | 0.03    | 0       | 0      | 1.09   | 0       | 0.03    | 8.42   | 10.71  | 2.97   |
| 1-2.c11469/1/1569   | --                              | --        | --           | 0.98    | 0      | 0.18    | 1.63    | 0.7     | 4.14   | 17.87  | 1.26    | 4.47    | 216.95 | 277.83 | 73.8   |
| 1-2.c24105/1/1356   | acyl-Coenzyme A dehydroge       | 89269093  | CAJ81939.1   | 0       | 7.16   | 1.9     | 1.64    | 13.08   | 11.4   | 7.73   | 3.05    | 8.28    | 0      | 0      | 0      |
| 1-2.c35380/1/5809   | PREDICTED: ADP/ATP trar         | 499026607 | XP_00456404  | 0       | 0      | 0       | 0       | 0       | 0      | 0      | 0       | 0       | 147.78 | 262.28 | 18.5   |
| 1-2.c44753/2/1726   | PREDICTED: myosin-bindin        | 556950430 | XP_00598765  | 1.79    | 0.36   | 3.81    | 1.94    | 4.11    | 2.41   | 2.61   | 3.82    | 5.84    | 0      | 0      | 0      |
| 2-3.c46272/1/4506   | ubiquitin carboxyl-terminal h   | 187608155 | NP_00112016  | 0       | 0      | 0       | 0       | 0       | 0      | 0.87   | 0       | 4.02    | 3.7    | 5.12   | 5.12   |
| 2-3.c7988/1/2180    | --                              | --        | --           | 0       | 19.15  | 0       | 0       | 0       | 0      | 0.33   | 0       | 0       | 5.47   | 3.68   | 4.16   |
| 2-3.c58978/1/2396   | --                              | --        | --           | 2.23    | 1.77   | 11.41   | 4.97    | 12.91   | 12.09  | 2.6    | 3.24    | 10.34   | 0.74   | 0.71   | 0.12   |
| 1-2.c20240/1/1590   | sarcoplasmic/endoplasmic ret    | 383511148 | AFH40438.1   | 1900.52 | 35.25  | 5805.04 | 2283.13 | 3091.6  | 1519.6 | 777.53 | 2118.78 | 4104.72 | 0      | 0      | 530.52 |
| 3-6.c14250/1/3002   | PREDICTED: transmembran         | 847111920 | XP_01281495  | 6.53    | 4.7    | 2.1     | 2.05    | 2.19    | 2.86   | 4.44   | 3.44    | 3.23    | 79.46  | 193.5  | 99.54  |
| 1-2.c19560/5/1393   | periostin precursor [Xenopus]   | 163915007 | NP_00110637  | 7.65    | 175.81 | 49.7    | 20.49   | 33.83   | 63.8   | 0.11   | 9.48    | 20.27   | 7.9    | 0.43   | 0.07   |
| 1-2.c2170/8/1809    | SET and MYND domain con         | 148225404 | NP_00108546  | 66.26   | 38.35  | 64.62   | 51.6    | 19.27   | 47.07  | 42.27  | 87      | 38.98   | 1.9    | 4.53   | 2.7    |
| 3-6.c18948/48/2915  | RecName: Full=Sarcoplasmic      | 9789732   | Q92105.1     | 967.19  | 0.03   | 0       | 1083.23 | 1345.43 | 697.18 | 627.88 | 856.27  | 0       | 0      | 0      | 241.83 |
| 1-2.c2135/29/1515   | coenzyme Q6 monooxygenas        | 148226512 | NP_00108956  | 18.32   | 1.48   | 15.08   | 16.9    | 11.31   | 1.7    | 4.7    | 2.43    | 10.07   | 0      | 0      | 0      |
| 3-6.c10246/1/2750   | DNA replication licensing fac   | 54020819  | NP_00100565  | 0.78    | 10.16  | 0.82    | 1.32    | 2.01    | 4.4    | 0      | 0.74    | 0.97    | 0      | 0      | 0.08   |
| 1-2.c49169/2/1685   | --                              | --        | --           | 0.03    | 1.17   | 0       | 0       | 0.04    | 0      | 1.79   | 0       | 1.24    | 8.5    | 11.05  | 8.81   |
| 3-6.c1140/24/3858   | LIM domain-binding protein      | 45360839  | NP_989095.1  | 9.96    | 15.45  | 57.77   | 39.87   | 52.37   | 81.81  | 49.73  | 27.18   | 47.85   | 2.66   | 0.93   | 9.64   |
| 1-2.c35370/1/1411   | clathrin interactor 1 [Xenopus] | 147902057 | NP_00108923  | 0       | 1.75   | 0       | 0       | 0       | 0.91   | 8.93   | 0       | 1.1     | 26.17  | 21.02  | 16.12  |
| 3-6.c10523/5/2996   | acetyl-CoA acetyltransferase    | 148234082 | NP_00108602  | 12.17   | 10.98  | 9.86    | 8.39    | 5.63    | 7.91   | 6.18   | 6.29    | 6.45    | 0.42   | 0.33   | 0.44   |
| 1-2.c17428/1/8059   | PREDICTED: serine/arginine      | 768366525 | XP_01158055  | 0.43    | 0      | 36.33   | 0       | 0       | 0      | 0      | 0       | 0       | 107    | 124.26 | 0      |
| 2-3.c52057/2/1997   | PREDICTED: isocitrate dehy      | 641774347 | XP_00817074  | 0       | 0.18   | 0       | 0       | 0       | 0      | 4.06   | 0       | 2.1     | 8.8    | 1.15   | 10.57  |
| 2-3.c9054/6/2135    | LOC398314 protein [Xenopus]     | 847150223 | AAI08429.1   | 37.53   | 29.79  | 45.13   | 34.12   | 30.23   | 30.31  | 10.65  | 26.55   | 15.03   | 3.63   | 0.87   | 2.67   |
| 3-6.c5374/1/2775    | SH3 domain binding kinase 1     | 163914831 | NP_00110662  | 0.11    | 0      | 3.21    | 1.6     | 1.27    | 2.14   | 0.5    | 1.86    | 1.54    | 0      | 0      | 0      |
| 1-2.c14149/3/1555   | --                              | --        | --           | 0       | 10.84  | 1.4     | 0.34    | 0       | 0.69   | 0.55   | 0.84    | 1.44    | 15.58  | 15.13  | 36.57  |
| 2-3.c22824/1/4823   | aconitase 2, mitochondrial [X   | 147904130 | NP_00108626  | 0       | 0      | 0       | 0       | 0       | 0      | 0      | 0       | 0       | 4.25   | 1.34   | 6.38   |
| 1-2.c38059/2/1384   | PREDICTED: actin, alpha ca      | 803091489 | XP_00401102  | 3.8     | 0      | 19.55   | 14.65   | 7.94    | 14.51  | 19.86  | 24.52   | 7.66    | 0.67   | 0      | 0.87   |
| 1-2.c23168/2/1377   | PREDICTED: alpha-tectorin-      | 847131824 | XP_01281925  | 1.14    | 0      | 1.26    | 0.1     | 0       | 0      | 0.85   | 1.27    | 0       | 15.1   | 11.08  | 5.07   |
| 1-2.c50543/1/1501   | PREDICTED: myosin-10-like       | 847150223 | XP_01282287  | 0.92    | 0.7    | 1.01    | 0       | 0       | 0      | 0.82   | 0       | 0.53    | 8.31   | 6.98   | 5.43   |
| 3-6.c16273/1/3924   | RecName: Full=FACT compi        | 110287969 | Q9W603.2     | 0.96    | 6.12   | 1.45    | 0.29    | 2.83    | 3.36   | 0.51   | 0       | 0       | 0      | 0      | 0      |
| 2-3.c55066/1/2457   | --                              | --        | --           | 136.09  | 87.92  | 50.1    | 92.16   | 34.78   | 75.3   | 15.26  | 76.94   | 77.46   | 2.26   | 4.07   | 6.75   |
| 2-3.c22637/3/2209   | PREDICTED: monocarboxyl         | 513191317 | XP_00494220  | 2.97    | 3.38   | 1.32    | 3.86    | 4.46    | 0.72   | 25.08  | 3.73    | 7.68    | 88.21  | 125.06 | 245.05 |
| 2-3.c61992/8/2407   | PREDICTED: uncharacterize       | 672020667 | XP_00877445  | 0.14    | 0      | 0       | 0.13    | 0       | 0      | 0.03   | 0.03    | 0       | 9.01   | 5.59   | 5.58   |
| 1-2.c52285/12/1164  | PREDICTED: myosin-4 [Xer        | 847156920 | XP_01282446  | 0       | 0      | 0       | 0       | 0       | 0      | 0.18   | 0       | 0       | 551.38 | 298.47 | 0      |
| 3-6.c18726/24/3600  | PREDICTED: myosin-4 [Xer        | 847156920 | XP_01282446  | 4.88    | 1.08   | 105.9   | 56.61   | 30.75   | 0.81   | 137.65 | 75.04   | 115.57  | 0      | 0      | 0      |
| 1-2.c23145/3/1629   | --                              | --        | --           | 6.4     | 0      | 2.49    | 0       | 0       | 0.81   | 0      | 4.54    | 0       | 39.21  | 26.12  | 10.15  |
| 2-3.c21019/1/2275   | syf2 protein [Xenopus (Silura   | 56268984  | AAH87564.1   | 21.05   | 17.44  | 16.07   | 9.49    | 26.31   | 8.27   | 3.79   | 5.52    | 0       | 0      | 0      | 0      |
| 1-2.c33457/1/4870   | translation elongation factor I | 211907091 | ACJ12080.1   | 0       | 0      | 0       | 0       | 0       | 7.38   | 136.92 | 20.73   | 0       | 404.41 | 431.83 | 92.63  |
| 1-2.c4280/1/180/182 | PREDICTED: myosin-bindin        | 556950430 | XP_00598765  | 369.09  | 164.4  | 786.7   | 493.57  | 537.45  | 400.02 | 586.11 | 733.12  | 646.74  | 32.07  | 21.9   | 72.31  |
| 1-2.c7390/2/1355    | PREDICTED: protein Shroor       | 847100721 | XP_01281266  | 3.07    | 6.84   | 2.93    | 1.38    | 2.29    | 3.5    | 1.57   | 3.35    | 2.85    | 93.66  | 117.34 | 90.64  |
| 3-6.c14081/1/3349   | histone-lysine N-methyltrans    | 148229543 | NP_00108865  | 1.16    | 3.92   | 1.11    | 0       | 0       | 0      | 0.11   | 0.52    | 0       | 2.08   | 2.12   | 3.78   |
| 1-2.c11073/1/1327   | PREDICTED: UDP-glucuron         | 743726910 | XP_01095746  | 0       | 0      | 0       | 0       | 0.51    | 0      | 5.47   | 2.17    | 0       | 19.19  | 17.68  | 16.88  |
| 2-3.c29088/1/2064   | uncharacterized protein LOC     | 147906100 | NP_00108995  | 1.81    | 0.05   | 0       | 0.06    | 0       | 0      | 1.92   | 0       | 0.6     | 6.74   | 4.83   | 6.01   |
| 1-2.c30883/1/1351   | hydroxysteroid dehydrogenas     | 56711282  | NP_00100867  | 0       | 0      | 0       | 0       | 0       | 0      | 0      | 0       | 0       | 16.74  | 20.11  | 2.44   |
| 2-3.c4597/1/2009    | PREDICTED: arrestin domai       | 847088847 | XP_01282126  | 0.69    | 0      | 0       | 1.05    | 0       | 0.22   | 0.33   | 0.19    | 0       | 19.47  | 30.62  | 21.76  |
| 1-2.c25297/2/1428   | PREDICTED: G-rich sequen        | 847162878 | XP_01282565  | 0       | 0      | 0       | 0       | 0       | 0      | 6.12   | 2.46    | 0       | 8.92   | 9.24   | 2.33   |
| 1-2.c23850/1/1482   | uncharacterized protein LOC     | 148232280 | NP_00108860  | 0.65    | 16.95  | 3.26    | 2.73    | 8.93    | 7.18   | 0.73   | 3.53    | 3.89    | 0      | 0      | 0      |
| 1-2.c31228/2/1721   | UBX domain-containing prot      | 54262234  | NP_00100581  | 1.76    | 1.73   | 3       | 1.53    | 3.25    | 3.44   | 0      | 2.14    | 1.67    | 0      | 0      | 0      |



|                    |                                 |           |             |        |        |        |        |        |        |        |        |        |         |         |         |
|--------------------|---------------------------------|-----------|-------------|--------|--------|--------|--------|--------|--------|--------|--------|--------|---------|---------|---------|
| 1-2.c1532/75/1801  | PREDICTED: eukaryotic init      | 847126504 | XP_01281807 | 34.52  | 9.38   | 33.23  | 53.56  | 65.5   | 51.69  | 3.85   | 47.83  | 19.73  | 10.26   | 5.83    | 1.48    |
| 2-3.c30862/1/2333  | uncharacterized protein LOC     | 148225160 | NP_00108922 | 1.08   | 56.82  | 0.58   | 0.92   | 10.14  | 18.85  | 2.09   | 1.71   | 1.14   | 0       | 0       | 0       |
| 1-2.c5319/4/1207   | PREDICTED: peptidyl-prolyl      | 742150246 | XP_01088046 | 117.9  | 63.06  | 245.12 | 216.02 | 195.52 | 188.9  | 266.71 | 221.24 | 247.29 | 22.02   | 9.73    | 27.35   |
| 1-2.c42982/1/1688  | PREDICTED: protein PFC07        | 556961274 | XP_00599098 | 0.66   | 0.59   | 2.62   | 2.71   | 2.85   | 7.34   | 2.03   | 1.72   | 3.37   | 0       | 0       | 0.24    |
| 2-3.c27324/2/1999  | SET and MYND domain con         | 148225404 | NP_00108546 | 70.92  | 25.91  | 44.1   | 31.87  | 20.53  | 53.24  | 27.93  | 35.74  | 19.53  | 1.48    | 5.26    | 3.15    |
| 2-3.c62186/38/243  | methylcrotonoyl-CoA carbox      | 148229681 | NP_00108606 | 8.54   | 9.21   | 19.87  | 10.11  | 7.1    | 4.04   | 6.81   | 10.03  | 15.05  | 0       | 0       | 1.15    |
| 1-2.c43372/1/1352  | --                              | --        | --          | 12.24  | 10.32  | 25.32  | 15.72  | 16.08  | 49.15  | 24.7   | 12.99  | 19.01  | 0.83    | 0.33    | 0.74    |
| 3-6.e17527/3/3163  | LOC398447 protein [Xenopus      | 117558475 | AAI25999.1  | 38.25  | 34.77  | 9.38   | 10.88  | 15.87  | 21.09  | 10.41  | 18.2   | 22.06  | 0.76    | 1.67    | 1.82    |
| 3-6.c18438/1/2623  | aquaporin [Hyla japonica]       | 148356713 | BAF63030.1  | 8.48   | 3.98   | 5.44   | 12.78  | 16.8   | 0      | 0      | 8.21   | 0      | 0       | 0       | 0       |
| 1-2.c39117/1/1720  | ribose-phosphate pyrophosph     | 45361007  | NP_989140.1 | 7.15   | 9.74   | 6.63   | 7.19   | 13.74  | 6.81   | 4.71   | 8.99   | 6.98   | 0       | 0       | 0.69    |
| 1-2.c42327/5/1700  | PREDICTED: myosin-bindin        | 556950430 | XP_00598765 | 116.77 | 52.78  | 237.64 | 151.64 | 168.68 | 148.35 | 217.46 | 216.5  | 234.4  | 16.4    | 4.91    | 24.92   |
| 2-3.c22212/2/1898  | PREDICTED: transmembran         | 602626865 | XP_00742038 | 0      | 0      | 0      | 0      | 0      | 0      | 0      | 0      | 0      | 13.3    | 8.87    | 1.53    |
| 2-3.c41875/1/2166  | calpain-8 [Xenopus (Silurana    | 113931326 | NP_00103910 | 0.09   | 0      | 18.97  | 13.05  | 7.17   | 4.2    | 20.6   | 8.89   | 18.38  | 0       | 0.5     | 0.6     |
| 2-3.c21187/1/2248  | --                              | --        | --          | 5.22   | 6.41   | 6.38   | 11.18  | 7.16   | 4.2    | 1.73   | 4.11   | 6.35   | 0.4     | 0       | 0.26    |
| 2-3.c35639/1/2168  | --                              | --        | --          | 8.31   | 1.15   | 5.29   | 7.41   | 2.66   | 3.25   | 6.34   | 6.37   | 6.6    | 122.66  | 300.43  | 159.27  |
| 1-2.c11056/3/1935  | hedgehog acyltransferase-like   | 147901798 | NP_00107945 | 113.08 | 17.71  | 160.72 | 124.51 | 147.3  | 62.29  | 40.53  | 115.47 | 100.17 | 15.43   | 2.75    | 15.91   |
| 2-3.c34672/1/1940  | --                              | --        | --          | 0      | 9.79   | 0.01   | 2.12   | 1.77   | 2.46   | 0      | 0      | 0.16   | 0       | 0       | 0       |
| 2-3.c41116/1/2724  | --                              | --        | --          | 2.33   | 5.37   | 4.58   | 7.99   | 9.95   | 12.56  | 17.24  | 10.59  | 14.95  | 333.92  | 447.43  | 338.54  |
| 3-6.c18077/1/2822  | --                              | --        | --          | 311.02 | 9.43   | 8.49   | 38.99  | 22.82  | 2.33   | 228.17 | 189.66 | 44.35  | 631.68  | 1022.68 | 602.94  |
| 1-2.c46632/1/1305  | actin, alpha skeletal muscle B  | 820145793 | KKX13565.1  | 35.87  | 3.13   | 83.05  | 68.06  | 87.2   | 67.85  | 52.32  | 82.43  | 54.98  | 9.08    | 6.01    | 7.15    |
| 1-2.c11629/2/1644  | Unknown (protein for IMAG       | 83405227  | AAI10974.1  | 0      | 0.24   | 0      | 0.4    | 0.2    | 0      | 1.12   | 1.45   | 3.16   | 7.43    | 24.05   | 14.55   |
| 3-6.c15317/1/3178  | PREDICTED: anoctamin-8 is       | 512814789 | XP_00491107 | 2.01   | 0      | 1.15   | 1.51   | 1.57   | 0.52   | 0.9    | 0.57   | 1.1    | 0       | 0       | 0       |
| 1-2.c44724/3/1472  | PREDICTED: interferon regu      | 847110323 | XP_01281464 | 2.34   | 0.15   | 0      | 0      | 0.31   | 0      | 1.31   | 0      | 1.31   | 11.12   | 15.25   | 9.84    |
| 1-2.c19112/1/1538  | E3 ubiquitin-protein ligase H   | 148231526 | NP_00108707 | 0      | 0.27   | 0      | 0.44   | 0      | 0      | 0      | 0.82   | 0      | 6.21    | 16.41   | 16.97   |
| 1-2.c33449/3/1288  | --                              | --        | --          | 28.53  | 11.74  | 0.36   | 20.64  | 12.22  | 2.95   | 67.15  | 10.37  | 17.46  | 322.38  | 532.57  | 366.11  |
| 2-3.c40338/1/2041  | --                              | --        | --          | 4.96   | 0.98   | 1.13   | 0.84   | 2.1    | 4.41   | 0.72   | 1.46   | 1.12   | 115.07  | 34.45   | 121.31  |
| 2-3.c41730/2/2436  | --                              | --        | --          | 31.02  | 16.59  | 41.22  | 29.4   | 25.77  | 43.58  | 24.84  | 15.67  | 48.01  | 1.38    | 4.58    | 3.71    |
| 1-2.c34551/1/1681  | ubiquitin carboxyl-terminal h   | 113931406 | NP_00103915 | 0      | 0.78   | 0      | 0      | 0      | 0      | 0      | 0      | 0      | 3.91    | 4.84    | 5.72    |
| 1-2.c45335/1/1714  | tripeptidyl-peptidase 1 precu   | 156717508 | NP_00109625 | 0      | 0      | 0      | 0      | 0      | 0      | 0      | 0      | 0      | 46.25   | 54.12   | 0       |
| 2-3.c23821/3/1933  | PREDICTED: thioredoxin do       | 560931211 | XP_00619174 | 14.53  | 36.09  | 17.35  | 13.98  | 22.63  | 12.48  | 3.7    | 2.89   | 6.65   | 0       | 0       | 3.26    |
| 2-3.c51963/5/2232  | PREDICTED: myosin-4 [Xen        | 847156920 | XP_01282446 | 0.71   | 0.22   | 29.19  | 24.31  | 17.31  | 0      | 40.19  | 27.79  | 39.32  | 0       | 0       | 0       |
| 1-2.c34829/2/1267  | glutamate dehydrogenase 1, r    | 58331978  | NP_00101113 | 1.71   | 0      | 0      | 0      | 0      | 0      | 8.45   | 2.02   | 0      | 40.27   | 19.43   | 5.4     |
| 1-2.c46615/1/1365  | PREDICTED: beta-catenin-li      | 847167940 | XP_01282706 | 0      | 0.96   | 0      | 0.51   | 0      | 0      | 4.49   | 0      | 1.99   | 14.29   | 19.89   | 11.96   |
| 1-2.c30776/2/1321  | PREDICTED: erythrocyte ba       | 852789601 | XP_01288561 | 0      | 0      | 0      | 0      | 0      | 0      | 0      | 0      | 0      | 58.45   | 65.63   | 0       |
| 1-2.c15050/1/1600  | --                              | --        | --          | 15.59  | 2.3    | 4.39   | 37.16  | 16.32  | 4.76   | 563.7  | 11.73  | 7.49   | 1040.23 | 390.65  | 1610.83 |
| 2-3.c5840/3/2220   | --                              | --        | --          | 0.3    | 3.57   | 0      | 1.8    | 0.7    | 3.08   | 1.48   | 0.06   | 0      | 0       | 0.03    | 0       |
| 1-2.c17552/1/1703  | calsequestrin 1 (fast-twitch, s | 148231736 | NP_00108022 | 31.42  | 6.95   | 58.2   | 35.1   | 64.79  | 93.81  | 36.15  | 50.15  | 49.61  | 8.22    | 3.02    | 7.54    |
| 2-3.c39729/1/2624  | uncharacterized protein LOC     | 148235829 | NP_00108315 | 13.39  | 14.57  | 22.23  | 16.04  | 26.59  | 13.46  | 6.84   | 10.78  | 10.85  | 0.6     | 0.56    | 3.64    |
| 3-6.c7216/1/3400   | RecName: Full=Voltage-dep       | 46576355  | O57483.1    | 46.79  | 16.62  | 77.13  | 35.06  | 63.97  | 73.05  | 36.25  | 55     | 53.74  | 4.65    | 2.04    | 10.22   |
| 2-3.c60601/1/2302  | --                              | --        | --          | 3      | 8.3    | 0.02   | 0.62   | 3.21   | 1.74   | 1.41   | 0      | 0      | 0       | 0       | 0       |
| 2-3.c50385/3/2248  | peptidyl-prolyl cis-trans isom  | 194018596 | NP_00112338 | 2.62   | 65.41  | 14.73  | 5.69   | 8.87   | 15.2   | 7.74   | 4.72   | 15.74  | 0.54    | 0.2     | 1.22    |
| 1-2.c17218/2/1428  | transgelin [Xenopus (Silurana   | 71896187  | NP_00102557 | 0      | 0      | 0.25   | 7.53   | 3.13   | 7.39   | 20.41  | 0      | 11.54  | 282.59  | 202.11  | 120.22  |
| 1-2.c30427/1/1363  | unnamed protein product [On     | 642108707 | CDQ72316.1  | 0      | 0      | 0      | 0      | 0      | 0      | 0      | 0      | 0      | 63.14   | 52.92   | 0       |
| 2-3.c9563/2/2022   | --                              | --        | --          | 32.84  | 5.46   | 24.92  | 23.01  | 37.05  | 26.98  | 24.18  | 9.42   | 50.24  | 1.52    | 4.92    | 2.44    |
| 1-2.c1762/36/1637  | adenylosuccinate lyase [Xenc    | 148226240 | NP_00108055 | 67.44  | 49.07  | 93.56  | 78.5   | 72.32  | 109.76 | 72.2   | 80.02  | 77.71  | 8.57    | 8.64    | 9.72    |
| 1-2.c16791/1/1686  | PREDICTED: ubiquitin-conji      | 836697765 | XP_01278931 | 0      | 0      | 0      | 0      | 0      | 0      | 1.69   | 0      | 0      | 13.75   | 18.17   | 1.67    |
| 1-2.c26968/12/1659 | PREDICTED: GTPase Era, n        | 512829715 | XP_00293812 | 3.36   | 12.17  | 3.74   | 2.7    | 1.39   | 7.14   | 1.15   | 0.4    | 1.04   | 0       | 0       | 0       |
| 1-2.c45527/1/1343  | poly(U)-binding-splicing fact   | 187607191 | NP_00112008 | 0      | 0      | 0      | 0      | 0      | 0      | 0      | 0      | 0.3    | 17.38   | 40.88   | 7.33    |
| 1-2.c48291/1/1860  | inositol hexakisphosphate kin   | 62859747  | NP_00101595 | 2.53   | 0      | 1.73   | 6.53   | 0      | 2.48   | 8.33   | 2.32   | 1.32   | 127.77  | 71.87   | 97.12   |
| 1-2.c23962/1/1312  | tetraspanin-31-B [Xenopus la    | 147903899 | NP_00107965 | 0      | 0      | 0      | 0      | 0      | 0      | 2.61   | 0      | 1.91   | 16.86   | 17.34   | 1.61    |
| 1-2.c48448/1/1307  | --                              | --        | --          | 15.74  | 0      | 0      | 4.25   | 0.35   | 0.78   | 22.16  | 0      | 2.77   | 90.97   | 77.61   | 42.92   |
| 1-2.c5909/1/1250   | hydroxyacyl-CoA dehydroge       | 148238090 | NP_00108561 | 0      | 0      | 0      | 0      | 0      | 0      | 11.88  | 0      | 0      | 82.99   | 124.58  | 0.36    |
| 2-3.c49787/1/2595  | alpha 1 type I collagen [Rana   | 3242649   | BAA29028.1  | 22.8   | 565.34 | 123.28 | 68.6   | 111.27 | 319.4  | 42.71  | 38.15  | 77.51  | 1.25    | 0       | 2.99    |
| 2-3.c62446/7/2068  | nucleolar protein 5 [Xenopus    | 89269840  | CAJ82550.1  | 18.48  | 122.49 | 25.52  | 17.86  | 21.98  | 42.23  | 16.28  | 20.49  | 14.33  | 2.13    | 0.76    | 4.26    |
| 2-3.c47531/1/2281  | pyridoxine-5'-phosphate oxid    | 187608780 | NP_00112001 | 1.38   | 5.72   | 4.54   | 4.41   | 4.29   | 3.09   | 3.25   | 4.14   | 4.8    | 0       | 0       | 0       |
| 1-2.c27775/1/2584  | PREDICTED: NADH dehydi          | 733928458 | XP_01072510 | 0      | 0      | 0      | 0      | 0      | 0      | 0      | 0.9    | 1.29   | 52.94   | 35.88   | 8.41    |
| 1-2.c34159/1/4011  | PREDICTED: LOW QUALI            | 829886178 | XP_01264411 | 6.93   | 15.28  | 4.35   | 16.32  | 3.57   | 16.75  | 8.56   | 2.69   | 33.73  | 465     | 458.69  | 242.9   |
| 1-2.c15226/1/1474  | Rab geranylgeranyltransferas    | 147900123 | NP_00108925 | 0      | 0      | 0      | 0      | 0      | 0      | 0      | 0      | 0      | 5.63    | 6.89    | 5.8     |

|                    |                                 |           |             |        |        |        |        |        |        |         |        |        |        |        |        |
|--------------------|---------------------------------|-----------|-------------|--------|--------|--------|--------|--------|--------|---------|--------|--------|--------|--------|--------|
| 2-3.c12389/1/2282  | signal peptide peptidase-like   | 118404330 | NP_00107287 | 0      | 0      | 0      | 0      | 0      | 0      | 0.76    | 0      | 0      | 5.08   | 6.27   | 4.94   |
| 3-6.e15198/1/2939  | PREDICTED: guanine deami        | 512813022 | XP_00491082 | 1.5    | 0.53   | 0.25   | 0      | 0.55   | 1.21   | 0.2     | 0.3    | 0.54   | 26.68  | 9.82   | 34.95  |
| 1-2.e28081/1/1433  | --                              | --        | --          | 0      | 0      | 0      | 0      | 0      | 0      | 0       | 0      | 0      | 47.53  | 47.53  | 0      |
| 1-2.e25284/1/4147  | PREDICTED: malate dehydr        | 149640897 | XP_00151125 | 47.31  | 29.66  | 82.35  | 90.44  | 79.87  | 69.69  | 45.34   | 77.88  | 74.18  | 0      | 12.14  | 10.82  |
| 1-2.e28892/2/1517  | PREDICTED: CCR4-NOT tran        | 301610011 | XP_00293457 | 0.26   | 4.66   | 2.35   | 1.05   | 2.83   | 4.41   | 0.04    | 1.43   | 0      | 0      | 0      | 0      |
| 1-2.e51307/8/1416  | eukaryotic translation initiati | 62859649  | NP_00101672 | 0      | 0      | 0      | 0      | 0      | 0      | 24.11   | 0      | 0      | 60.71  | 82.26  | 0      |
| 1-2.e5664/3/1423   | PREDICTED: unconventional       | 301612177 | XP_00293556 | 3.37   | 4.93   | 1.77   | 0.55   | 0.07   | 0.45   | 9.89    | 2.02   | 2.29   | 22.97  | 21.32  | 17.67  |
| 1-2.e6185/2/1375   | aconitase 2, mitochondrial [X   | 147904130 | NP_00108626 | 0      | 0      | 0      | 0      | 0      | 0      | 0       | 0      | 0      | 49.98  | 47.58  | 0      |
| 2-3.c13222/1/2137  | PREDICTED: aspartyl/aspar       | 562852296 | XP_00615483 | 1.16   | 1      | 2.43   | 1.25   | 3.41   | 6.38   | 2.25    | 4.13   | 3.29   | 0      | 0      | 0.19   |
| 1-2.c13253/1/1772  | eukaryotic translation initiati | 148232020 | NP_00108075 | 1.95   | 22.24  | 2.92   | 2.92   | 2.45   | 1.26   | 0       | 4.73   | 4.79   | 0      | 0      | 0      |
| 2-3.e3161/2/2554   | CCR4-NOT transcription con      | 148228213 | NP_00109065 | 17.55  | 0      | 3.74   | 0      | 0      | 0      | 0       | 0      | 0      | 19.88  | 0.01   | 23.68  |
| 3-6.e14935/1/3721  | vigilin [Xenopus (Silurana) tr  | 55742112  | NP_00100685 | 15.52  | 17.6   | 12.81  | 0.08   | 11.79  | 8.85   | 3.73    | 3.29   | 8.32   | 0      | 0      | 0      |
| 1-2.e29411/1/1857  | PREDICTED: polypeptide N        | 847131447 | XP_01281920 | 1.74   | 3.2    | 4.38   | 4.47   | 10.77  | 6.29   | 3.29    | 3.3    | 7.43   | 0      | 0.61   | 0      |
| 1-2.e35015/1/1773  | --                              | --        | --          | 4.78   | 0.89   | 0      | 0      | 0      | 0      | 0.03    | 0      | 5.66   | 1.75   | 16.85  | 11.51  |
| 1-2.c3425/3/1531   | platelet-derived growth facto   | 71896169  | NP_00102558 | 107.68 | 77.32  | 96.92  | 75.19  | 50.54  | 52.93  | 41.79   | 83.12  | 59.48  | 1.71   | 5.27   | 10.82  |
| 1-2.c3288/2/1291   | egl-9 family hypoxia-inducib    | 148227604 | NP_00108656 | 1.01   | 19.01  | 0      | 6.97   | 9.18   | 3.99   | 0       | 0      | 1.81   | 0.73   | 0      | 0      |
| 1-2.e47331/7/1846  | collagen alpha-1(I) chain prec  | 58332412  | NP_00101100 | 0      | 0      | 0      | 0      | 0      | 0      | 0       | 0      | 0      | 11.25  | 14.4   | 1.26   |
| 2-3.e2584/3/2313   | RecName: Full=Sarcoplasmic      | 9789732   | Q92105.1    | 0      | 0      | 0      | 0      | 0      | 0      | 0       | 0      | 0      | 127.92 | 270.65 | 0      |
| 1-2.e27341/2/1620  | PREDICTED: nebulin isoform      | 847166510 | XP_01282661 | 118.79 | 36.55  | 124.16 | 227.16 | 181.58 | 362.1  | 181.96  | 287.9  | 135.21 | 43.57  | 7.48   | 31.95  |
| 2-3.e30358/2/1875  | PREDICTED: interleukin enl      | 847169995 | XP_01280854 | 5.07   | 7.27   | 0.41   | 2.94   | 0      | 0      | 8.63    | 10.24  | 0      | 32.4   | 48.96  | 32.71  |
| 1-2.e43137/1/1301  | --                              | --        | --          | 0.37   | 1.01   | 0.31   | 1.44   | 0      | 0.23   | 3.59    | 2.37   | 0      | 20.24  | 28     | 34.38  |
| 2-3.c3092/2/2361   | heterogeneous nuclear ribonu    | 187607268 | NP_00112002 | 0.11   | 101.43 | 0.12   | 0.07   | 25.72  | 51.4   | 0.09    | 16.16  | 0      | 0      | 0      | 0      |
| 1-2.e25668/2/1209  | PREDICTED: 14-3-3 protein       | 602663371 | XP_00743731 | 0      | 0      | 0      | 0      | 0      | 0      | 0       | 0      | 0      | 110.14 | 72.47  | 0      |
| 2-3.c18905/1/2213  | PREDICTED: probable palm        | 512842773 | XP_00491465 | 0.84   | 0.14   | 0.13   | 0      | 0      | 0      | 0       | 0.73   | 0      | 5.57   | 1.14   | 3.89   |
| 1-2.c12883/1/1722  | PREDICTED: 26S proteasom        | 301612173 | XP_00293561 | 0      | 0      | 0      | 0      | 0      | 0      | 0       | 0      | 0      | 35.37  | 35.96  | 0      |
| 1-2.e14958/1/1888  | --                              | --        | --          | 89.18  | 23.06  | 74.81  | 33.75  | 29.86  | 0.96   | 9.5     | 34.74  | 24.12  | 0      | 0      | 0      |
| 2-3.c12222/1/2125  | --                              | --        | --          | 0      | 0.31   | 0      | 0      | 0      | 0      | 0       | 0      | 0      | 29.41  | 15.84  | 33.29  |
| 2-3.e2272/9/2556   | PREDICTED: fibronectin tyr      | 512827549 | XP_00293967 | 24.15  | 5.41   | 24.14  | 13.75  | 19.39  | 13.35  | 7.09    | 15.09  | 12.67  | 0.93   | 1.08   | 2.33   |
| 2-3.e62692/2/2582  | nicotinamide nucleotide trans   | 148231869 | NP_00108770 | 0      | 0      | 0      | 0      | 0      | 0      | 0       | 0      | 4.88   | 3.56   | 0.87   | 4.11   |
| 2-3.e1126/152/2512 | PREDICTED: NADH-ubiqui          | 641774292 | XP_00817072 | 37.33  | 15.95  | 41.51  | 33.19  | 39.6   | 18.44  | 16.35   | 23.86  | 28.24  | 2.44   | 1.63   | 5.35   |
| 2-3.c3322/8/2422   | calpain-8 [Xenopus (Silurana    | 113931326 | NP_00103910 | 10.58  | 2.68   | 16.17  | 15.9   | 11.55  | 4.76   | 15.65   | 20.77  | 15.52  | 1.04   | 0      | 1.21   |
| 2-3.e54123/1/2257  | RecName: Full=Collagen alp      | 18202034  | O42350.1    | 30.83  | 363.97 | 101.73 | 69.92  | 121.17 | 273.55 | 35.87   | 29.35  | 60.76  | 7.53   | 5.68   | 5.29   |
| 1-2.e49308/1/4547  | endoplasmic reticulum-Golgi     | 47575764  | NP_00100122 | 0      | 2.52   | 0.48   | 0.24   | 0      | 0      | 0.57    | 0.51   | 0.87   | 10.22  | 7.46   | 9.7    |
| 1-2.c35824/1/1272  | PREDICTED: carnosine synt       | 847171322 | XP_00491926 | 10.92  | 5.11   | 21.27  | 8.48   | 13.72  | 25.02  | 4.93    | 9.02   | 9.95   | 0.97   | 1.12   | 1.25   |
| 2-3.e39567/1/2263  | PREDICTED: transmembran         | 847111917 | XP_00293230 | 1.54   | 0      | 2.72   | 2.01   | 0      | 0      | 4.98    | 1.51   | 3.91   | 52.35  | 177.13 | 78.09  |
| 2-3.e20013/1/2011  | gamma-glutamyl hydrolase p      | 71896119  | NP_00102555 | 1.81   | 10.85  | 0.39   | 0.76   | 3.31   | 1.15   | 19.73   | 0.02   | 3.37   | 33.98  | 71.14  | 84.69  |
| 1-2.c32911/1/1410  | ectonucleotide pyrophosphat     | 147899125 | NP_00108052 | 0      | 11.57  | 0.19   | 0.1    | 0      | 0.93   | 0       | 0.84   | 0      | 34.19  | 7.7    | 25.39  |
| 2-3.e55655/1/2379  | --                              | --        | --          | 1.24   | 5.85   | 0.66   | 1.22   | 1.8    | 4.73   | 1.35    | 0.33   | 1      | 0      | 0      | 0.11   |
| 2-3.c15089/4/2714  | PREDICTED: NADH-ubiqui          | 641774292 | XP_00817072 | 54.02  | 20.66  | 41.65  | 45.25  | 70.85  | 43.27  | 30.6    | 44.16  | 39.38  | 3.95   | 6.35   | 7.85   |
| 3-6.c18561/1/4282  | --                              | --        | --          | 0      | 0      | 0      | 0      | 0      | 0      | 3.19    | 0      | 0      | 2.74   | 2.53   | 2.62   |
| 3-6.e6077/1/3143   | glycogen phosphorylase, brai    | 50054411  | NP_00100190 | 0      | 3.59   | 2.14   | 0      | 7.09   | 8.99   | 0       | 1.47   | 0      | 0      | 0      | 0      |
| 1-2.c16828/1/1361  | --                              | --        | --          | 0      | 0      | 0      | 0      | 0      | 0      | 0       | 0      | 0      | 43.46  | 43.11  | 0      |
| 1-2.c23294/2/1270  | LOC100170598 protein [Xen       | 189442022 | AAI67684.1  | 0.31   | 0      | 0      | 0.06   | 0      | 0.02   | 0       | 0.06   | 0.28   | 9.53   | 7.64   | 7.36   |
| 2-3.e56811/1/2357  | --                              | --        | --          | 11.02  | 5.69   | 15.23  | 9.33   | 10.84  | 10.54  | 5.46    | 7.78   | 7.75   | 0.59   | 0.61   | 1.25   |
| 2-3.e2496/19/2100  | PREDICTED: LOW QUALI            | 664723035 | XP_00851860 | 42.66  | 67.36  | 37.08  | 45.17  | 39.16  | 67.73  | 20.25   | 44.31  | 73.04  | 7.5    | 2.89   | 5.96   |
| 2-3.c28307/1/2130  | uncharacterized protein LOC     | 148229417 | NP_00107975 | 0      | 0      | 0      | 0      | 0      | 0      | 0.22    | 0      | 0.48   | 3.79   | 5.5    | 1.41   |
| 2-3.e48038/1/2059  | PREDICTED: keratin, type II     | 677974099 | XP_00907205 | 733.81 | 653.38 | 604.54 | 479.88 | 1303.8 | 430.2  | 1315.08 | 665.91 | 423.8  | 16.5   | 13.03  | 18.55  |
| 3-6.e16716/1/3515  | PREDICTED: myomesin-2 is        | 512841520 | XP_00293520 | 9.42   | 9.39   | 39.51  | 38.39  | 34.51  | 52.21  | 24.13   | 31.37  | 28.9   | 4.03   | 1.22   | 7.84   |
| 1-2.c6489/1/1389.1 | --                              | --        | --          | 0      | 0      | 0      | 0      | 0      | 0.13   | 0       | 0      | 1.94   | 17.54  | 12.58  | 12.98  |
| 3-6.e7697/1/3092   | --                              | --        | --          | 45.77  | 3.08   | 27.38  | 78.93  | 112.55 | 91.26  | 81.31   | 83.08  | 24.54  | 17.43  | 3.35   | 4.25   |
| 1-2.e27046/34/1901 | PREDICTED: heat shock cog       | 512854037 | XP_00293757 | 0      | 2.25   | 0      | 0      | 0      | 0      | 0       | 0      | 0      | 28.33  | 27.16  | 0.04   |
| 1-2.c24896/1/1227  | --                              | --        | --          | 2.75   | 0      | 0      | 0.32   | 0      | 0      | 0       | 1.85   | 0.25   | 11.96  | 16.97  | 9.41   |
| 1-2.e41246/1/1258  | Dual specificity protein phos   | 678214136 | KFV81115.1  | 6.2    | 8.6    | 0.59   | 4.38   | 3.81   | 3.62   | 9.02    | 7.56   | 14.82  | 122.57 | 186.19 | 80.32  |
| 3-6.c18884/8/2992  | WD repeat-containing protei     | 187608294 | NP_00112035 | 1.02   | 6.87   | 0.76   | 0.8    | 1.76   | 3.44   | 0.68    | 0.54   | 0.49   | 0.07   | 0      | 0.06   |
| 1-2.e29706/1/1472  | PREDICTED: pyruvate dehy        | 530574466 | XP_00528163 | 33.25  | 16.99  | 1.69   | 56.7   | 42.94  | 25.26  | 20.17   | 49.06  | 32.31  | 2.49   | 4.94   | 5.84   |
| 3-6.e9454/1/3466.1 | PREDICTED: isocitrate dehy      | 831547357 | XP_01272691 | 406.37 | 274.58 | 366.08 | 279.42 | 334.36 | 329.41 | 231.58  | 270.05 | 261.8  | 39.69  | 40.98  | 34.52  |
| 1-2.c32641/1/6799  | uncharacterized protein LOC     | 148232024 | NP_00108962 | 11.33  | 2.58   | 4.02   | 3.72   | 0.16   | 0      | 8.7     | 5.34   | 5.69   | 71.37  | 81.34  | 35.31  |
| 1-2.c36201/3/1487  | WD repeat-containing protei     | 55742525  | NP_00100678 | 37.66  | 20.28  | 7.66   | 12.49  | 0      | 0      | 29.53   | 10.49  | 0      | 159.39 | 80.29  | 148.42 |

|                    |                                |           |             |         |        |        |         |         |         |        |         |        |         |         |        |
|--------------------|--------------------------------|-----------|-------------|---------|--------|--------|---------|---------|---------|--------|---------|--------|---------|---------|--------|
| 2-3.c48583/1/2047  | --                             | --        | 5.38        | 0       | 3.37   | 0.43   | 4.13    | 0.84    | 0       | 4.21   | 0.84    | 121.48 | 121.21  | 34.43   |        |
| 1-2.c45192/1/1712  | PREDICTED: aspartate--trn      | 847163066 | XP_01282572 | 22.94   | 70.55  | 38.42  | 53.64   | 75.1    | 66.83   | 36.58  | 44.2    | 31.36  | 5.72    | 5.02    | 10.74  |
| 3-6.c14747/1/3100  | E3 ubiquitin-protein ligase M  | 183986655 | NP_00111691 | 0       | 1.13   | 0      | 1.5     | 2.13    | 0.66    | 0      | 0.71    | 0      | 0       | 0       | 0      |
| 1-2.c14699/1/1481  | --                             | --        | 7.61        | 21.49   | 0.2    | 0      | 0       | 0       | 5.62    | 0      | 13.86   | 0      | 60.71   | 48.4    | 0      |
| 1-2.c5071/1/4048.1 | PREDICTED: LOW QUALI           | 803125841 | XP_00401312 | 1.74    | 0      | 0      | 0       | 0.88    | 0       | 13.66  | 0       | 557.07 | 587.32  | 0       | 0      |
| 3-6.c8486/1/3731   | PREDICTED: ribosome-bind       | 847127305 | XP_01281832 | 2.14    | 12.58  | 0.52   | 1.44    | 1.45    | 5.58    | 0      | 0       | 1.28   | 0       | 0       | 0.02   |
| 1-2.c39104/1/1823  | RNA demethylase ALKBH5         | 148231788 | NP_00108570 | 0       | 3      | 0      | 0       | 0       | 2.35    | 13.03  | 0       | 0      | 94.27   | 167.32  | 38.15  |
| 1-2.c30592/1/1322  | ran-binding protein 9 [Xenop   | 113205900 | NP_00103797 | 0       | 0      | 0      | 0       | 0       | 0       | 0      | 0       | 0.35   | 34.93   | 45.63   | 1.08   |
| 1-2.c25094/1/1776  | PREDICTED: choline/ethane      | 733921552 | XP_01072232 | 8.34    | 9.99   | 5.61   | 2.62    | 4.4     | 8.99    | 2.85   | 4.02    | 0.64   | 0       | 0       | 0.59   |
| 2-3.c39332/2/1950  | --                             | --        | 0.49        | 1.84    | 0      | 0      | 0.56    | 0       | 5.35    | 1.19   | 1.7     | 10.77  | 5.99    | 17.62   | 0      |
| 2-3.c52464/1/2417  | proliferation-associated prote | 56605876  | NP_00100843 | 0.86    | 37.02  | 12.52  | 9.85    | 10.4    | 30.67   | 11.93  | 9.5     | 0.48   | 0.69    | 0.89    | 0.36   |
| 3-6.c16114/1/3063  | RecName: Full=Voltage-dep      | 46576355  | O57483.1    | 3.81    | 1.68   | 6.55   | 5.65    | 2.29    | 2.94    | 3.22   | 0       | 0.13   | 0.66    | 0       | 0      |
| 3-6.c4216/1/2939.1 | PREDICTED: vegetative cell     | 635140510 | XP_00801711 | 10.45   | 4.24   | 0      | 0.26    | 0       | 0.65    | 13.48  | 5.87    | 0.05   | 25.76   | 43.12   | 27.79  |
| 3-6.c16673/1/3890  | leucine--trNA ligase, cytopl   | 62751875  | NP_00101583 | 3.07    | 11.08  | 4.47   | 3.07    | 4.51    | 11.41   | 1.44   | 2.71    | 2.43   | 0       | 0.13    | 0.44   |
| 1-2.c45202/1/5025  | PREDICTED: actin, alpha ca     | 803091489 | XP_00401102 | 2.44    | 0      | 4.64   | 31.43   | 4.59    | 3.35    | 764.83 | 24.26   | 54.07  | 2049.47 | 1717.13 | 391.9  |
| 1-2.c48452/1/1358  | biglycan precursor [Xenopus    | 147905193 | NP_00108626 | 0       | 0      | 0      | 0       | 0       | 0       | 0      | 0       | 0.1    | 7.02    | 9       | 1.72   |
| 2-3.c62753/24/2291 | methylcrotonoyl-CoA carbox     | 148229681 | NP_00108606 | 6.77    | 14.6   | 0      | 9.31    | 5.71    | 12.19   | 5.15   | 0       | 0      | 0.62    | 1.42    | 0.33   |
| 3-6.c12316/22/2964 | Glycogen phosphorylase, mu     | 465954282 | EMP25833.1  | 59.21   | 2.15   | 55.62  | 56.76   | 55.47   | 42.98   | 47     | 71.3    | 44.52  | 14.73   | 1.46    | 2.61   |
| 1-2.c51825/255/155 | Myozenin-1-like [Xenopus la    | 148237556 | NP_00107945 | 1135.51 | 81.32  | 740.29 | 1134.01 | 1405.33 | 1042.46 | 421.74 | 1171.67 | 510.6  | 68.73   | 88.53   | 265.08 |
| 1-2.c13505/1/1288  | eukaryotic translation initiat | 148235981 | NP_00108766 | 7.88    | 70.73  | 22.68  | 1.86    | 17.83   | 16.69   | 0      | 0       | 5.15   | 0       | 0       | 0      |
| 1-2.c1750/59/1533  | PREDICTED: complement c        | 512820694 | XP_00293686 | 36.82   | 94.22  | 31.65  | 31.51   | 25.19   | 49.86   | 14.67  | 13.79   | 25.68  | 3.55    | 3       | 4.25   |
| 2-3.c27424/1/2285  | LOC548400 protein, partial [   | 59861981  | AAH90369.1  | 0.82    | 3.47   | 13.83  | 30.49   | 9.41    | 4.56    | 49.04  | 44.15   | 35.18  | 443.24  | 672.38  | 244.2  |
| 1-2.c18866/1/1362  | PREDICTED: splicing factor     | 637335070 | XP_00811537 | 0       | 14.07  | 0      | 9.95    | 8.11    | 19.62   | 0      | 6       | 15.71  | 0       | 3.07    | 0      |
| 2-3.c62947/2/2242  | --                             | --        | 0           | 0       | 0      | 0      | 0       | 0       | 1.4     | 0      | 0.09    | 0      | 18.47   | 22.7    | 0      |
| 2-3.c37639/2/1925  | Methionine-R-sulfoxide redu    | 431892020 | ELK02467.1  | 0       | 0      | 0      | 0.03    | 0       | 0       | 0      | 0       | 0      | 5.45    | 3.54    | 4.87   |
| 2-3.c22034/1/2250  | PREDICTED: serine/threonin     | 847153661 | XP_01282361 | 0.65    | 6.68   | 2.11   | 2.2     | 4.08    | 8.63    | 2.26   | 1.51    | 0      | 0       | 0.82    | 0      |
| 1-2.c24555/1/1365  | --                             | --        | 30.28       | 8.41    | 73.06  | 44.73  | 80.59   | 140.74  | 63.79   | 60.61  | 64.93   | 13.5   | 3.05    | 12.28   | 0      |
| 1-2.c11440/2/1195  | polyadenylate-binding protei   | 52346016  | NP_00100505 | 0       | 0      | 0      | 0       | 0       | 0       | 15.16  | 0       | 0      | 209.05  | 497.96  | 9.99   |
| 1-2.c14090/1/1749  | claudin-3 [Xenopus (Silurana   | 54020932  | NP_00100570 | 0.67    | 0.27   | 0.24   | 0       | 0.1     | 0.59    | 0      | 0       | 1.39   | 23.98   | 10.4    | 18.75  |
| 1-2.c10848/4/1593  | --                             | --        | 1.86        | 6.99    | 0.85   | 1.98   | 2.18    | 3.81    | 8.75    | 1.36   | 1.67    | 106.29 | 118.45  | 78.28   | 0      |
| 2-3.c26218/1/1927  | --                             | --        | 0           | 0       | 0      | 0      | 0       | 0       | 0       | 0      | 0       | 0      | 9.54    | 11.09   | 15.68  |
| 2-3.c57287/6/2316  | eukaryotic translation initiat | 209969740 | NP_00112964 | 0       | 0      | 0      | 0       | 0       | 0       | 0      | 0       | 0      | 20.71   | 37.25   | 1.93   |
| 3-6.c12193/54/2756 | glutamate dehydrogenase 1, r   | 58331978  | NP_00101113 | 14.92   | 37.11  | 18.76  | 21.88   | 36.56   | 40.4    | 3.08   | 16.34   | 29.79  | 4.58    | 3.83    | 3.21   |
| 1-2.c35476/1/1581  | PREDICTED: abl interactor :    | 573898164 | XP_00663681 | 1.5     | 5.53   | 2.75   | 0.75    | 2.59    | 3.91    | 1.08   | 3.4     | 2.26   | 0       | 0       | 0      |
| 1-2.c40039/1/1185  | PREDICTED: glycogen phos       | 556954754 | XP_00598898 | 72.83   | 9.9    | 91.91  | 142.56  | 165.85  | 84.28   | 131.92 | 162.86  | 233.33 | 3.6     | 11.99   | 29.52  |
| 2-3.c1599/26/2537  | PREDICTED: protein phosph      | 847087415 | XP_01281725 | 0       | 3.22   | 19.98  | 1.23    | 21.36   | 16.33   | 6.92   | 0       | 2.86   | 0.15    | 0       | 0      |
| 3-6.c13626/1/5444  | PREDICTED: long-chain fat      | 512839272 | XP_00491424 | 1.49    | 3.38   | 1.25   | 3.27    | 0       | 0.74    | 4.98   | 0.71    | 2.2    | 41.31   | 32.27   | 51.34  |
| 3-6.c7204/1/2919   | putative elongator complex p   | 147901297 | NP_00108994 | 0.75    | 0.73   | 0.4    | 0.69    | 1.28    | 1.69    | 0.17   | 0       | 0.56   | 0       | 0.02    | 0      |
| 1-2.c32693/1/1336  | PREDICTED: matrix metallo      | 847165172 | XP_01282626 | 4.6     | 0.23   | 0.15   | 1.04    | 2.86    | 0.4     | 5.18   | 5.36    | 7.42   | 26.22   | 75.21   | 57.1   |
| 1-2.c41740/2/1404  | uncharacterized protein LOC    | 148229755 | NP_00108990 | 1.67    | 31.32  | 0.38   | 0.54    | 3.39    | 5.33    | 1.5    | 1.2     | 0      | 0       | 0       | 0      |
| 2-3.c3701/1/2119   | --                             | --        | 10.76       | 14.21   | 8.88   | 9.15   | 8.9     | 10.02   | 3.03    | 5.36   | 14.79   | 1.27   | 0.68    | 0.41    | 0      |
| 1-2.c46545/1/1478  | alcohol dehydrogenase 5 (cla   | 148223732 | NP_00108642 | 55.8    | 137.39 | 50.61  | 32.57   | 36.17   | 80.15   | 30.1   | 37.78   | 31.26  | 5.55    | 5.05    | 5.46   |
| 2-3.c3003/15/2117  | Ptded3 protein [Xenopus laevi  | 62739333  | AAH94135.1  | 17.27   | 21.72  | 9.78   | 8.23    | 9.1     | 15.28   | 9.34   | 8.09    | 5.68   | 0.65    | 0.75    | 1.26   |
| 2-3.c45942/1/2583  | 4-hydroxyphenylpyruvate dic    | 118404104 | NP_00107237 | 2.43    | 7.89   | 6.39   | 0.39    | 2.2     | 1.73    | 12.21  | 1.45    | 3.79   | 0       | 0       | 0      |
| 2-3.c32752/1/2342  | PREDICTED: protein FAM1        | 530638059 | XP_00530584 | 0       | 0      | 1.63   | 1.98    | 0.67    | 1.88    | 1.22   | 2.15    | 1.45   | 0       | 0       | 0      |
| 1-2.c19028/3/1285  | PREDICTED: rRNA 2'-O-me        | 558189237 | XP_00612907 | 10.89   | 51.53  | 5.27   | 11.95   | 10.47   | 27.95   | 11.47  | 10.86   | 3.87   | 1.57    | 0.82    | 1.49   |
| 1-2.c8743/1/1793   | --                             | --        | 2.07        | 16.88   | 1.26   | 6.06   | 2.37    | 1.71    | 31.26   | 3.6    | 5.53    | 90.62  | 131.61  | 86.16   | 0      |
| 2-3.c43800/1/2127  | Mimitin, mitochondrial precu   | 226372810 | ACO52030.1  | 2.09    | 1.37   | 1.2    | 1.86    | 1.14    | 2.55    | 0.98   | 1.39    | 2.16   | 0       | 0       | 0      |
| 2-3.c16585/3/2247  | AFG3-like protein 2 [Xenopu    | 118404624 | NP_00107275 | 0       | 0.33   | 0      | 0       | 0       | 0       | 1.1    | 0       | 0      | 5.86    | 4.21    | 0.73   |
| 2-3.c2027/12/2325  | PREDICTED: polyadenylate-      | 847099772 | XP_01281235 | 57.35   | 30.34  | 57.29  | 39.7    | 46.84   | 67.23   | 34.97  | 30.3    | 50.28  | 4.56    | 6.2     | 7.35   |
| 2-3.c38485/5/2578  | glycogen phosphorylase, brai   | 50054411  | NP_00100190 | 1.83    | 2.53   | 2.4    | 6.81    | 12.58   | 12.66   | 9.83   | 7.87    | 12.66  | 3.17    | 0       | 0      |
| 1-2.c10170/170/174 | PREDICTED: alpha-enolase       | 675426353 | XP_00892698 | 287.86  | 151.21 | 584.03 | 300.1   | 394.54  | 685.24  | 287.96 | 404.53  | 381.12 | 60.07   | 25.88   | 79.15  |
| 2-3.c34079/1/2556  | .ATP synthase subunit alpha, 1 | 71896075  | NP_00102561 | 0       | 138.01 | 314.39 | 258.66  | 339.92  | 168.35  | 147.92 | 249.66  | 239.3  | 22.2    | 0       | 64.22  |
| 3-6.c2179/22/2953  | PREDICTED: E3 ubiquitin-p      | 512842584 | XP_00294018 | 0.34    | 11.6   | 0.68   | 0.55    | 1.03    | 2.8     | 0.13   | 0       | 0.38   | 0       | 0       | 0      |
| 1-2.c5552/3/1378   | syntenin-1 [Xenopus (Siluran   | 55742362  | NP_00100680 | 7.01    | 8.06   | 1.35   | 0.2     | 1.88    | 1.79    | 7.35   | 0       | 3.64   | 56.49   | 68.03   | 20.39  |
| 1-2.c11988/1/1846  | uncharacterized protein LOC    | 147905311 | NP_00109060 | 0       | 0.87   | 0.71   | 3.7     | 0.3     | 5.05    | 0.63   | 6.43    | 1.26   | 112.21  | 134.89  | 82.7   |
| 1-2.c13540/6/1504  | gamma-sarcoglycan [Xenopu      | 118404980 | NP_00107290 | 23.61   | 21.96  | 60.83  | 81.02   | 65.47   | 91.45   | 25.15  | 25.36   | 81.21  | 6.69    | 13.96   | 8.9    |
| 1-2.c9273/1/1520   | --                             | --        | 5.48        | 8.39    | 1.18   | 3.3    | 0.85    | 5.18    | 9.43    | 4.63   | 4.84    | 88.98  | 90.91   | 89.19   | 0      |



|                     |                                 |           |             |         |         |          |         |          |         |        |          |         |         |        |         |
|---------------------|---------------------------------|-----------|-------------|---------|---------|----------|---------|----------|---------|--------|----------|---------|---------|--------|---------|
| 3-6.c6870/1/3083    | cell division cycle 25A protei  | 44895334  | AAS48918.1  | 0.37    | 13.33   | 0.37     | 0.29    | 1.28     | 2.42    | 0.03   | 0.99     | 1.13    | 0       | 0      | 0       |
| 1-2.c45833/1/1581   | PREDICTED: uncharacterize       | 512850405 | XP_00293835 | 0.9     | 0.08    | 4.14     | 2.42    | 4.27     | 7.89    | 2.11   | 4.62     | 4.68    | 0.11    | 0.3    | 0       |
| 2-3.c46984/1/2028   | --                              | --        | --          | 0.06    | 12.2    | 5.49     | 2.16    | 0.36     | 3.38    | 3.12   | 2.06     | 1.43    | 0       | 0      | 0       |
| 3-6.c2902/5/3423    | PREDICTED: catenin delta-1      | 847116240 | XP_01281585 | 0.67    | 23.27   | 1.18     | 0       | 5.18     | 5.47    | 0      | 2.9      | 0       | 0       | 0      | 0       |
| 1-2.c38869/1/8486   | PREDICTED: heterogeneous        | 874483668 | XP_01295842 | 63.42   | 274.72  | 55.86    | 47.9    | 66.75    | 86.56   | 25.92  | 56.54    | 22.84   | 0       | 0      | 17.19   |
| 1-2.c1381/1/10/1606 | PREDICTED: aspartate amin       | 532002698 | XP_0053456C | 128.7   | 171.24  | 147.44   | 449.49  | 429.88   | 227.72  | 425.38 | 330.5    | 486.66  | 26.58   | 95.56  | 35.23   |
| 3-6.c16855/1/3259   | periostin precursor [Xenopus    | 163915007 | NP_00110637 | 3.43    | 15.16   | 10.02    | 7.69    | 7.71     | 9.88    | 6.13   | 6.93     | 7.06    | 1.08    | 0.87   | 0.62    |
| 1-2.c50069/1/1843   | E3 ubiquitin-protein ligase ar  | 148228271 | NP_00108982 | 0       | 0       | 0        | 0       | 0        | 0       | 4.38   | 0.7      | 0       | 2.15    | 7.32   | 2.84    |
| 3-6.c13732/1/2958   | --                              | --        | --          | 60.48   | 25.08   | 112.43   | 105.34  | 94.81    | 113.88  | 136.74 | 109.85   | 129.8   | 13.3    | 3.79   | 20.74   |
| 3-6.c3534/2/2899    | PREDICTED: LOW QUALI            | 512830904 | XP_00293188 | 3.24    | 8.3     | 2.77     | 1.66    | 2.06     | 2.77    | 1.94   | 0        | 1.5     | 0       | 0      | 0.17    |
| 2-3.c1458/32/2465   | PREDICTED: olfactomedin -       | 847154698 | XP_01282391 | 7.41    | 0.96    | 3.54     | 6.73    | 3.44     | 0.5     | 199.99 | 4.94     | 1.59    | 142.14  | 93.96  | 74.92   |
| 3-6.c9447/1/6228    | PREDICTED: E3 ubiquitin-p       | 512821131 | XP_00293523 | 0       | 0       | 0.23     | 1.17    | 1.45     | 0.75    | 0      | 0        | 0.24    | 0       | 0      | 0       |
| 2-3.c15817/1/2018   | profilin-2 [Xenopus (Silurana   | 62859423  | NP_00101605 | 4.39    | 9.02    | 8.2      | 4.46    | 7.61     | 8.98    | 2.77   | 6.26     | 6.44    | 0       | 0.2    | 1.16    |
| 1-2.c19093/2/1378   | --                              | --        | --          | 10.3    | 25.58   | 0        | 0       | 0        | 0       | 0      | 0        | 23.21   | 32.02   | 34.12  | 0       |
| 1-2.c17896/1/1525   | --                              | --        | --          | 0       | 0.13    | 0        | 0.04    | 0        | 0       | 0.97   | 0        | 0.74    | 7.07    | 7.44   | 3.35    |
| 1-2.c23241/1/1501   | PREDICTED: protein ATP1H        | 301604441 | XP_00293184 | 1.56    | 0.41    | 3.94     | 1.08    | 2.81     | 6.84    | 0.89   | 1.46     | 1.02    | 0       | 0      | 0       |
| 2-3.c14847/2/2642   | DEAD (Asp-Glu-Ala-Asp) bc       | 148235819 | NP_00108945 | 3.38    | 21.76   | 2.45     | 2.52    | 4.41     | 9.81    | 1.9    | 1.1      | 1.45    | 0.17    | 0.19   | 0.38    |
| 2-3.c39396/2/2763   | transmembrane protein 182 p     | 118404178 | NP_0010724C | 2.37    | 3.1     | 3.1      | 1.71    | 0.98     | 5.25    | 0      | 0        | 1.53    | 0       | 0      | 0       |
| 2-3.c21865/1/2082   | PREDICTED: LIM domain-t         | 847142884 | XP_01282173 | 24.53   | 19.16   | 159.73   | 72.58   | 133.89   | 210.01  | 61.79  | 60.04    | 121.24  | 7.16    | 3.35   | 32.14   |
| 3-6.c17854/23/3023  | PREDICTED: choline transp       | 530641746 | XP_0053076C | 0       | 3.34    | 1.99     | 1.19    | 1.87     | 4.01    | 0      | 0.63     | 0       | 0.17    | 0.12   | 0       |
| 3-6.c3240/2/3594    | Zinc finger protein 330 [Fuk    | 676271522 | KFO26545.1  | 4.11    | 9.45    | 4.33     | 4.24    | 6.33     | 8.8     | 2.81   | 2.25     | 3.2     | 0.36    | 0.97   | 0.51    |
| 3-6.c6443/1/3207    | PREDICTED: RNA-binding          | 847153751 | XP_01282364 | 0       | 0       | 10.01    | 0       | 0        | 0       | 0      | 0        | 0       | 14.53   | 19.38  | 0       |
| 1-2.c2040/12/1672   | tripartite motif-containing prc | 147906184 | NP_00107992 | 60.4    | 47.04   | 125      | 79.31   | 57.3     | 87.7    | 57.21  | 78.46    | 94.35   | 14.35   | 9.52   | 4.95    |
| 2-3.c62132/2/2712   | serpin peptidase inhibitor, cla | 147904661 | NP_0010859E | 21.71   | 42.34   | 37.86    | 22.35   | 28.68    | 29.34   | 14.73  | 22.43    | 16.83   | 3.63    | 0.27   | 5.01    |
| 3-6.c10615/1/2832   | PREDICTED: LOW QUALI            | 847146731 | XP_01282223 | 1.49    | 4.53    | 0.74     | 0.61    | 1.69     | 3.13    | 1.19   | 0.65     | 0.3     | 0       | 0      | 0.09    |
| 1-2.c52361/3/1244   | PREDICTED: myosin-4 [Xer        | 847156920 | XP_01282446 | 2.11    | 0       | 26.12    | 22.77   | 15.59    | 0.32    | 29.31  | 19.41    | 16.01   | 0       | 0      | 0       |
| 2-3.c23272/1/2506   | --                              | --        | --          | 0       | 2.53    | 0        | 0.03    | 0.07     | 0       | 0      | 0.75     | 0       | 5.86    | 4.46   | 3.09    |
| 1-2.c27390/4/1348   | PREDICTED: aldehyde oxid        | 847167054 | XP_0029377E | 8.08    | 5.46    | 5.03     | 12.59   | 4.81     | 7.4     | 18.53  | 5.08     | 11.07   | 237.67  | 230.58 | 207.63  |
| 1-2.c51301/2/1261   | PREDICTED: LOW QUALI            | 573880367 | XP_0066283E | 7.99    | 59.05   | 169      | 165.18  | 158.56   | 123.52  | 191.46 | 245      | 114.02  | 42.57   | 9.81   | 7.04    |
| 3-6.c14787/1/2712   | PREDICTED: myosin-4 [Xer        | 847156920 | XP_01282446 | 29.64   | 15.27   | 11.27    | 6.05    | 5.75     | 0       | 9.62   | 8.39     | 8.95    | 0       | 0      | 0       |
| 2-3.c42887/1/2256   | PREDICTED: fat storage-ind      | 847092180 | XP_00491081 | 0.22    | 0       | 1.24     | 2.02    | 1.77     | 2.53    | 0.45   | 0.83     | 0.77    | 0.11    | 0      | 0       |
| 1-2.c1511/13/1512   | PREDICTED: pyruvate dehy        | 505846104 | XP_00461653 | 282.55  | 74.41   | 260.78   | 114.93  | 223.45   | 234.26  | 85.71  | 192.97   | 93.99   | 17.19   | 43.41  | 18.19   |
| 1-2.c45065/1/1407   | --                              | --        | --          | 0.3     | 1.21    | 0.1      | 0.12    | 0.11     | 0.79    | 0.27   | 0        | 0.41    | 15.38   | 14.23  | 23.18   |
| 2-3.c34570/1/2062   | --                              | --        | --          | 3.65    | 2.15    | 0        | 10.03   | 0        | 0       | 0      | 0        | 11.57   | 103.52  | 206.06 | 82.68   |
| 2-3.c18392/933/211  | pyruvate kinase PKM isoform     | 118405080 | NP_00107253 | 226.98  | 23.51   | 482.33   | 445.02  | 425.59   | 286.71  | 320.94 | 420.48   | 133.37  | 22.05   | 0      | 116.99  |
| 1-2.c42074/1836     | PREDICTED: very-long-chai       | 847170095 | XP_0128085E | 45.43   | 1.39    | 72.15    | 50.14   | 58.73    | 80.84   | 1.27   | 62.6     | 63.51   | 0       | 0      | 20.26   |
| 1-2.c36794/1/1539   | phosphoglucomutase-1 [Cric      | 537225147 | ERE83081.1  | 0.32    | 1.01    | 0        | 0       | 16.35    | 13.3    | 13.19  | 18.13    | 0       | 0       | 0      | 0       |
| 1-2.c34288/1/1519   | --                              | --        | --          | 0       | 0       | 0        | 0       | 0        | 0       | 0      | 0        | 0       | 33.74   | 46.5   | 0       |
| 1-2.c36844/1/1392   | PREDICTED: erythrocyte ba       | 512857691 | XP_0049166E | 0.09    | 0.09    | 0        | 0       | 0.04     | 0       | 4.04   | 0        | 0       | 14.45   | 4.49   | 34.22   |
| 2-3.c18599/13/2513  | dihydroipoamide branched c      | 147900987 | NP_0010877E | 8.69    | 15.12   | 12.5     | 11.99   | 10.4     | 14.02   | 11.65  | 4.99     | 10.68   | 1.25    | 0.47   | 1.84    |
| 2-3.c28716/1/2439   | PREDICTED: importin subu        | 301621730 | XP_0029401E | 4.14    | 16.07   | 2.66     | 7.32    | 0        | 10.49   | 7.26   | 0.12     | 4.54    | 0       | 0      | 0       |
| 1-2.c52192/7/1661   | protease, serine, 8 precursor [ | 148222777 | NP_0010817E | 5.07    | 2.57    | 4.56     | 1.35    | 3.94     | 2.79    | 5.6    | 0.49     | 1.2     | 138.82  | 136.2  | 421.3   |
| 2-3.c34015/1/2802   | acidic leucine-rich nuclear ph  | 148228396 | NP_0010831E | 6.94    | 12.72   | 13.3     | 6.03    | 15.83    | 9.8     | 4.76   | 2.96     | 2.68    | 0       | 0      | 1.72    |
| 2-3.c48219/1/2457   | PREDICTED: GMP reductas         | 597771204 | XP_0072493E | 36.85   | 8.31    | 36.11    | 24.78   | 45.63    | 30.24   | 19.64  | 23.26    | 13.13   | 3.4     | 1.07   | 1.95    |
| 3-6.c15031/1/2778   | --                              | --        | --          | 0       | 0       | 0        | 0       | 0        | 0.15    | 1.3    | 0        | 0       | 3.23    | 4.13   | 6       |
| 1-2.c38125/1/1745   | ariadne RBR E3 ubiquitin prc    | 148237715 | NP_00109024 | 7.55    | 8.42    | 0.84     | 3.4     | 13.64    | 11.57   | 0      | 4.57     | 3.6     | 0       | 0      | 0       |
| 2-3.c17535/1/2173   | --                              | --        | --          | 5.79    | 5.09    | 9.81     | 9.37    | 7.81     | 10.73   | 9.42   | 11.46    | 17.58   | 0.45    | 1.19   | 0.97    |
| 1-2.c49962/1/1597   | alanyl-tRNA synthetase dom      | 148230330 | NP_0010802E | 0.35    | 2.61    | 0.9      | 1.21    | 1.6      | 4.42    | 0      | 0.65     | 0       | 0       | 0      | 0       |
| 1-2.c8948/5/1623    | PREDICTED: heterogeneous        | 847142386 | XP_0128215E | 19.09   | 297.43  | 27.55    | 23.99   | 38.84    | 56.2    | 22.8   | 25.32    | 15.62   | 0       | 0.63   | 11.62   |
| 3-6.c13494/1/3225   | ethanolamine-phosphate phos     | 147905107 | NP_00108663 | 3.94    | 2.69    | 0.56     | 1.7     | 4.71     | 0       | 23.25  | 3.19     | 3.23    | 48.43   | 59.89  | 74.93   |
| 3-6.c2598/14/3419   | PREDICTED: ubiquitin-prote      | 847099174 | XP_01281214 | 2.82    | 0       | 4.39     | 2.02    | 3.2      | 4.59    | 0.66   | 3        | 0       | 0       | 0      | 0.56    |
| 1-2.c7357/1/1326    | --                              | --        | --          | 0.06    | 35.58   | 5.97     | 6.18    | 4.74     | 25.14   | 9.55   | 4.6      | 0       | 0       | 0      | 0       |
| 2-3.c60290/1/2304   | PREDICTED: TPR and anky         | 847139365 | XP_01282093 | 0.41    | 1.25    | 0.02     | 0       | 0        | 0       | 1.18   | 0        | 0       | 1.95    | 4.05   | 2.94    |
| 1-2.c18504/1/1816   | PREDICTED: actin, alpha ca      | 803091489 | XP_0040110E | 6684.95 | 2303.66 | 16106.55 | 9933.69 | 10253.91 | 8370.97 | 6525.5 | 10907.14 | 8562.34 | 1472.55 | 596.57 | 1766.09 |
| 2-3.c10741/1/2517   | --                              | --        | --          | 10.13   | 19.58   | 26       | 7.27    | 7.67     | 10.31   | 4.52   | 8.94     | 12.46   | 0.67    | 1.17   | 0.64    |
| 1-2.c46014/1/1238   | --                              | --        | --          | 0.63    | 3.26    | 0        | 0.56    | 0        | 0.17    | 2.18   | 0        | 0       | 16.86   | 22.82  | 6.93    |
| 2-3.c50849/13/1905  | PREDICTED: methylmalona         | 558137835 | XP_0061178E | 88.61   | 69.91   | 94.91    | 91.82   | 70.31    | 71.61   | 78.31  | 75.46    | 70.89   | 11.06   | 8.77   | 10.99   |
| 2-3.c10655/1/1942   | PREDICTED: aryl hydrocarb       | 847107950 | XP_0128138E | 0.4     | 5.09    | 0.42     | 0.37    | 0.08     | 0.58    | 0.52   | 0.34     | 0.41    | 10.45   | 20.36  | 12.52   |

|                    |                                 |           |             |          |        |          |          |          |          |          |          |          |         |         |         |
|--------------------|---------------------------------|-----------|-------------|----------|--------|----------|----------|----------|----------|----------|----------|----------|---------|---------|---------|
| 2-3.c24029/1/2691  | PREDICTED: collagen alpha       | 847156838 | XP_01282444 | 3.12     | 32.15  | 10.49    | 6.08     | 7.94     | 15.7     | 2.25     | 4.35     | 6.4      | 0.6     | 0       | 2.05    |
| 1-2.e28809/2/1493  | heterogeneous nuclear ribonu    | 188528957 | NP_00112090 | 0        | 0      | 0        | 0.38     | 0        | 1.37     | 3.74     | 0        | 2.88     | 20.38   | 22.85   | 22.29   |
| 1-2.e11192/1/1621  | parvalbumin beta protein [Ra    | 20797085  | CAC95153.1  | 21656.01 | 6639.1 | 41711.65 | 26311.28 | 37425.45 | 80449.06 | 31251.84 | 38625.53 | 33129.32 | 6698.85 | 4332.16 | 6065.22 |
| 2-3.c48490/1/2763  | ubiquitin-like modifier activa  | 147902384 | NP_00108398 | 0.1      | 35.51  | 0.11     | 4.35     | 5.64     | 7.61     | 2.54     | 2.78     | 3.52     | 0       | 1.8     | 0       |
| 2-3.e23312/1/2164  | FAS-associated factor 2 [Xen    | 113931576 | NP_00103923 | 0        | 0      | 0        | 0        | 0        | 3.27     | 0        | 2.92     | 18.51    | 20.17   | 0       | 0       |
| 1-2.e29334/3/1213  | Y-box-binding protein 3 [Xer    | 62751871  | NP_00101585 | 214.32   | 148.36 | 256.71   | 156.76   | 190.2    | 379.35   | 179.13   | 251.4    | 244.63   | 0       | 0       | 82.03   |
| 2-3.c7287/5/2214   | --                              | --        | --          | 21.43    | 8.39   | 17.01    | 7.42     | 12.02    | 0.25     | 6.6      | 4.98     | 4.38     | 0       | 0       | 0       |
| 3-6.e6789/1/2831   | PREDICTED: nebulin isofor       | 847166512 | XP_01282661 | 2.88     | 0.12   | 0        | 0.05     | 16.43    | 10.31    | 4.32     | 3.1      | 0        | 0       | 0       | 0       |
| 2-3.c35251/1/2532  | ryanodine receptor beta isof    | 29501272  | BAA04647.2  | 1.74     | 1.24   | 0        | 4.33     | 5.24     | 6.61     | 6.39     | 5.15     | 0        | 0       | 0       | 1.06    |
| 1-2.c36168/5/1492  | LOC443630 protein, partial [    | 49118212  | AAH73209.1  | 1.14     | 2.08   | 0.74     | 1.42     | 2.3      | 3.58     | 0.64     | 1.29     | 0.65     | 0       | 0       | 0       |
| 2-3.e2386/17/2552  | RNA-binding protein 24-A []     | 147907395 | NP_00108095 | 47.34    | 54.84  | 42.82    | 38.46    | 69.74    | 68.86    | 38.17    | 45.17    | 52.68    | 9.4     | 6.39    | 7.83    |
| 2-3.e4996/4/2031   | SET and MYND domain con         | 148225404 | NP_00108546 | 1.64     | 0.44   | 0.93     | 1.05     | 3.58     | 6.36     | 0.2      | 0.73     | 2.9      | 0.15    | 0.08    | 0.06    |
| 2-3.c43362/1/2519  | LOC399077 protein [Xenopu       | 111185534 | AAH63720.2  | 1.81     | 1.24   | 4.14     | 2.21     | 3.51     | 3.29     | 0.63     | 1.41     | 1.16     | 0.17    | 0.13    | 0.11    |
| 1-2.e17294/2/1431  | PREDICTED: UTP--glucose         | 847127397 | XP_01281836 | 0        | 0      | 0        | 0        | 0        | 0        | 0        | 0        | 91.55    | 188.09  | 0.09    | 0.09    |
| 2-3.c36298/1/2238  | PREDICTED: ankyrin repeat       | 512839176 | XP_00293505 | 56.41    | 1.37   | 24.12    | 26       | 34.23    | 3.09     | 9.65     | 37.9     | 40.66    | 0.56    | 0       | 0       |
| 2-3.c43657/1/2120  | --                              | --        | --          | 8.72     | 5.06   | 3.47     | 4.28     | 3.79     | 3.47     | 13.95    | 3.25     | 6.21     | 120.81  | 61.74   | 116.17  |
| 1-2.e13524/1/1580  | PHD finger protein 1 [Xenop     | 148233497 | NP_00108195 | 0        | 0      | 0        | 0        | 0        | 0        | 2.23     | 0        | 0        | 4.35    | 7.23    | 1.79    |
| 1-2.e8353/5/1478   | matrix metalloproteinase-9TF    | 147901642 | NP_00109130 | 0        | 0      | 0.21     | 0        | 0        | 0        | 1.16     | 0        | 0        | 36.46   | 52.64   | 0.05    |
| 2-3.c27019/1/2532  | PREDICTED: uridine-cytidir      | 611978736 | XP_00747556 | 16.39    | 2.05   | 17.63    | 9.45     | 11.3     | 3.04     | 11.29    | 9.66     | 20.09    | 0       | 0       | 1.62    |
| 1-2.e48859/2/1591  | ER membrane protein compl       | 147906471 | NP_00108517 | 0        | 0      | 0        | 0        | 0        | 0        | 0        | 0.75     | 0        | 5.48    | 4.9     | 2.82    |
| 2-3.e56390/1/2024  | --                              | --        | --          | 2.99     | 6.55   | 5.24     | 3.62     | 1.86     | 6.02     | 1.77     | 3.44     | 3.65     | 0       | 0.56    | 0       |
| 2-3.e5971/4/1930   | PREDICTED: beta-enolase [       | 637381761 | XP_00812393 | 0        | 0      | 0        | 0        | 0        | 0        | 8.9      | 0        | 0.06     | 36.82   | 64.11   | 0.03    |
| 2-3.e55830/1/2472  | PREDICTED: spermine oxid        | 557322059 | XP_00603412 | 3.17     | 15.57  | 1.15     | 3.97     | 13.75    | 9.3      | 25.03    | 4.21     | 18.02    | 347.33  | 241.95  | 140.33  |
| 1-2.e14295/1/1176  | fragile X mental retardation, i | 89268870  | CAJ81473.1  | 54.48    | 14.65  | 50.74    | 13.74    | 18.14    | 39.3     | 12.42    | 16.79    | 38.53    | 3.02    | 0.52    | 3.15    |
| 1-2.e18559/1/1428  | PREDICTED: coiled-coil doi      | 641766368 | XP_00816803 | 1.36     | 0.42   | 0        | 0        | 0        | 0        | 1.01     | 0        | 0        | 5.1     | 6.9     | 3.81    |
| 2-3.e15497/1/2007  | --                              | --        | --          | 0.34     | 0      | 0        | 0        | 0        | 0        | 3.67     | 1.51     | 0        | 8.47    | 9.49    | 3.53    |
| 2-3.e1170/135/1965 | ornithine decarboxylase 1 [X    | 148237898 | NP_00108016 | 50.67    | 373.47 | 28.03    | 29.91    | 24.85    | 34.23    | 27.56    | 32.38    | 41.27    | 8.31    | 0.16    | 2.38    |
| 1-2.e25692/1/1624  | PREDICTED: serine-rich coi      | 677907793 | XP_00906865 | 0        | 2.16   | 0        | 0        | 0        | 0        | 0.57     | 0        | 0        | 4.17    | 7.2     | 1.36    |
| 1-2.e22957/1/1806  | sorting nexin 9 [Xenopus lae    | 148237966 | NP_00108661 | 4.67     | 0      | 0        | 0        | 0        | 0        | 0        | 0        | 0        | 1.17    | 7.11    | 5.72    |
| 3-6.e5993/1/2939   | 1 unnamed protein product [On   | 642115355 | CDQ68211.1  | 2.78     | 4.48   | 4.61     | 8.02     | 5.32     | 17.62    | 7.21     | 2.95     | 7.33     | 1.02    | 0.59    | 1.05    |
| 1-2.e44729/1/1761  | PREDICTED: protein transp       | 847087089 | XP_01281626 | 0.76     | 6.35   | 0.52     | 0.91     | 2.23     | 4.2      | 1.37     | 0.95     | 0.16     | 0       | 0.09    | 0       |
| 1-2.e5314/1/9256   | 2 PREDICTED: LOW QUALI          | 637377851 | XP_00812323 | 35.62    | 7.07   | 131.28   | 183.4    | 161.65   | 72.02    | 58.18    | 101.4    | 239.91   | 9.27    | 5.26    | 37.91   |
| 2-3.c39462/1/2138  | PREDICTED: cytosolic non-       | 591359347 | XP_00705465 | 75.52    | 6.05   | 0.33     | 24.1     | 71.54    | 3.38     | 37.5     | 46.19    | 74.06    | 851.38  | 985.56  | 761.42  |
| 1-2.e3696/2/1340   | --                              | --        | --          | 0        | 0      | 0        | 0        | 0        | 0        | 0        | 0        | 0        | 22.74   | 33.51   | 1.08    |
| 2-3.e51064/7/2467  | myosin, heavy chain 4, skelet   | 47575800  | NP_00100124 | 6.35     | 0.04   | 113.16   | 45.02    | 17.71    | 1.76     | 160.93   | 67.8     | 128.11   | 0       | 0       | 0       |
| 2-3.e10903/1/2540  | solute carrier family 37 (gluc  | 148232489 | NP_00108046 | 0        | 0      | 0        | 0        | 0        | 0        | 0.1      | 5.28     | 0.12     | 0       | 11.22   | 14.17   |
| 1-2.e18240/1/1332  | keratin 5, type II [Xenopus (S  | 118404108 | NP_00107237 | 0.14     | 0      | 0.7      | 0.12     | 0.07     | 6.23     | 3.04     | 0.2      | 1.57     | 47.33   | 59.7    | 129.58  |
| 1-2.e52270/4/1243  | PREDICTED: heat shock cog       | 512854037 | XP_00293757 | 111.23   | 0.06   | 0        | 97.95    | 0.91     | 47       | 448.84   | 67.06    | 134.44   | 981.64  | 1650.89 | 898.97  |
| 1-2.e12693/2/1741  | coatomer protein complex, su    | 148235681 | NP_00108357 | 0        | 6.92   | 0        | 0        | 0        | 0        | 7.88     | 0.53     | 0.64     | 3.47    | 5.45    | 3.26    |
| 1-2.e19626/1/1231  | --                              | --        | --          | 2.61     | 0      | 0        | 0        | 0        | 0        | 0        | 0        | 2.52     | 4.32    | 7.17    | 6.99    |
| 1-2.e26228/1/1428  | --                              | --        | --          | 6.89     | 9.6    | 0.55     | 5.37     | 0        | 1.79     | 12.06    | 3.44     | 6.36     | 65.85   | 79.74   | 56.35   |
| 2-3.c13458/1/6442  | PREDICTED: dihydrolipoyl        | 602630522 | XP_00742217 | 13.73    | 1.71   | 7.05     | 24.76    | 14.3     | 11.41    | 3.22     | 4.66     | 0        | 0       | 0       | 1.66    |
| 2-3.c44152/1/2137  | --                              | --        | --          | 46.82    | 35.76  | 23.13    | 29.86    | 32.39    | 11.64    | 12.25    | 11.25    | 27.03    | 0       | 0       | 8.28    |
| 1-2.e23402/1/1550  | xaa-Pro dipeptidase [Xenopu     | 56118636  | NP_00100805 | 15.64    | 0      | 5.83     | 0.03     | 0.3      | 0        | 0.11     | 10.11    | 9.59     | 40.46   | 3.84    | 52.44   |
| 1-2.e29487/1/1321  | PREDICTED: conserved olig       | 847150844 | XP_01282297 | 0        | 0      | 0        | 0        | 0        | 0        | 5.5      | 0        | 0        | 33.16   | 45.41   | 0       |
| 1-2.e24396/4/1524  | MGC52527 protein [Xenopus       | 28838469  | AAH47954.1  | 0.71     | 2.92   | 0.55     | 2.92     | 2.06     | 0.01     | 13.07    | 3.02     | 2.33     | 56.65   | 55.8    | 40.92   |
| 1-2.e25396/1/1280  | zinc finger protein 207 [Xeno   | 89269088  | CAJ81941.1  | 0.99     | 0      | 0        | 0        | 0        | 0        | 0        | 0        | 0        | 6.73    | 8.02    | 2.06    |
| 2-3.e16165/9/2218  | PREDICTED: alanine--glyox       | 525026364 | XP_00506063 | 17.28    | 6.04   | 13.65    | 11.88    | 11.25    | 5.25     | 6.49     | 11.13    | 10.57    | 1.25    | 1.14    | 0.65    |
| 2-3.c39785/1/2172  | PREDICTED: tRNA-dihydro         | 301615796 | XP_00293736 | 0        | 0      | 0        | 0        | 0        | 0        | 1.2      | 0        | 0        | 8.06    | 10.32   | 4.49    |
| 2-3.e41905/1/2061  | zygotie DNA replication licer   | 45361635  | NP_989393.1 | 2.44     | 43.95  | 2.29     | 1.67     | 5.3      | 9.64     | 0.27     | 2.44     | 2.26     | 0       | 0       | 0.4     |
| 1-2.c34794/1/6686  | PREDICTED: actin, alpha sk      | 664748946 | XP_00853187 | 51.45    | 17.68  | 69.88    | 45.95    | 42.93    | 41.01    | 20.29    | 40.18    | 29.55    | 6.48    | 3.89    | 4.48    |
| 1-2.e51245/1/1838  | propionyl CoA carboxylase, l    | 147904714 | NP_00108365 | 9.07     | 39.49  | 25.3     | 23.18    | 25.53    | 51.89    | 10.2     | 8.54     | 19.98    | 6.71    | 2.06    | 3.64    |
| 1-2.e6736/1/1366   | pre-rRNA-processing protein     | 148230961 | NP_00108828 | 2.85     | 0      | 0        | 2.81     | 1.98     | 9.75     | 0        | 1.65     | 0        | 0       | 0       | 0       |
| 2-3.e26282/152/222 | GDP dissociation inhibitor 2    | 148234617 | NP_00108023 | 1.55     | 3.06   | 1.3      | 1.17     | 1.2      | 2.1      | 3.31     | 0.59     | 3.19     | 0       | 0       | 0       |
| 1-2.c38269/1/1282  | --                              | --        | --          | 0        | 1.5    | 3.67     | 0        | 0        | 0        | 10.15    | 0        | 2.42     | 49.72   | 32.54   | 0       |
| 1-2.e45883/1/1450  | PREDICTED: cathepsin L1-l       | 558221328 | XP_00613595 | 297.79   | 27.22  | 57.06    | 160.42   | 151.03   | 28.85    | 281.09   | 183.59   | 207.57   | 3531.63 | 2419.31 | 2480.56 |
| 2-3.e10511/10/2259 | PREDICTED: sodium-indepe        | 512873189 | XP_00293735 | 0.92     | 0      | 0        | 2.69     | 3.63     | 2.57     | 0        | 0.8      | 1.78     | 0       | 0       | 0.32    |
| 2-3.c28070/2/2389  | MGC82073 protein [Xenopus       | 147905808 | NP_00108636 | 3.66     | 2.14   | 0.62     | 0.08     | 0        | 0        | 1.18     | 1.93     | 1.1      | 2.73    | 4.58    | 4.75    |

|                       |                                |           |             |         |         |          |          |          |          |          |          |         |         |         |        |
|-----------------------|--------------------------------|-----------|-------------|---------|---------|----------|----------|----------|----------|----------|----------|---------|---------|---------|--------|
| 3-6.c3323/2/3013      | PREDICTED: myomesin-2 is       | 847130012 | XP_01281893 | 96.09   | 92.03   | 233.85   | 260.41   | 206.25   | 330.94   | 198.71   | 177.64   | 238.05  | 37.68   | 14.8    | 56.08  |
| 2-3.c6529/2/2284.1    | ayt13 protein [Xenopus (Silur  | 58400917  | AAH89229.1  | 0.73    | 0       | 3.59     | 0        | 0        | 0        | 0        | 0.01     | 2.52    | 6.32    | 1.31    | 6.47   |
| 2-3.c12593/1/2077     | DDB1- and CUL4-associated      | 45360649  | NP_988998.1 | 0       | 0       | 0        | 0        | 0        | 0        | 2.4      | 2.71     | 0       | 5.06    | 3.93    | 1.3    |
| 1-2.c14995/7/1720     | cyclic AMP-responsive elem     | 163915079 | NP_00110635 | 0       | 16.51   | 10.25    | 0        | 0        | 0.1      | 14.95    | 0        | 10.66   | 38.3    | 0       | 43.45  |
| 2-3.c4239/3/2531      | Uba1a protein [Xenopus laevis  | 28958137  | AAH47256.1  | 0       | 0       | 0        | 0        | 0        | 0        | 0        | 0        | 0       | 18.11   | 12.89   | 0      |
| 2-3.c36966/1/2453     | PREDICTED: host cell factor    | 543381231 | XP_0055338C | 6.24    | 3.11    | 1.72     | 2.19     | 1.87     | 1.18     | 9.83     | 3.28     | 3.25    | 42.75   | 57.8    | 42.58  |
| 3-6.c4674/1/3456.2    | PREDICTED: F-actin-cappin      | 395539262 | XP_00377155 | 17.74   | 0       | 61.5     | 34.54    | 37.65    | 103.01   | 36.8     | 0        | 0       | 0       | 0       | 10.33  |
| 2-3.c45644/1/1887     | PREDICTED: glutamate-rich      | 557258909 | XP_00601514 | 11.47   | 24.8    | 3.04     | 5.96     | 5.8      | 14.62    | 7.88     | 4.05     | 7.98    | 1.22    | 0.24    | 0.71   |
| 2-3.c36235/1/2359     | PREDICTED: unconventional      | 847102432 | XP_01281298 | 20.24   | 12.62   | 17.14    | 9.79     | 9.54     | 16.25    | 6.42     | 18.95    | 11.07   | 4.06    | 0       | 0      |
| 2-3.c27776/1/2253     | PREDICTED: phosphatidylin      | 847137764 | XP_0128207C | 2.2     | 6.15    | 1.48     | 1.49     | 1.42     | 3.4      | 0.85     | 1.46     | 2.48    | 52.95   | 52.69   | 60.45  |
| 2-3.c63423/4/2514     | signal transducer and activate | 194018632 | NP_0011234C | 6.1     | 0       | 2.38     | 5.04     | 0        | 5.64     | 5.47     | 2.52     | 7.83    | 0       | 0       | 0      |
| 2-3.c63555/4/1963     | regulator of G-protein signal  | 291290887 | NP_00116747 | 0       | 0.77    | 0.42     | 0.25     | 1.23     | 1.92     | 1.44     | 0        | 1.33    | 32.11   | 25.75   | 37.65  |
| 1-2.c5228/1/1459.1    | --                             | --        | --          | 6.3     | 7.08    | 8.23     | 2.52     | 7.81     | 5.32     | 3.89     | 4.16     | 4.88    | 0       | 0       | 0      |
| 1-2.c7618/7/1774      | voltage dependent calcium ch   | 11414922  | BAB18553.1  | 52.2    | 12.89   | 79.37    | 61.62    | 75.31    | 59.01    | 44.31    | 62.55    | 52.26   | 9.41    | 2.75    | 13.75  |
| 1-2.c20852/1/1909.--  | --                             | --        | --          | 0.28    | 0.38    | 0.44     | 3.09     | 0.32     | 0        | 4.73     | 0.68     | 1.01    | 63.2    | 67.91   | 34.7   |
| 1-2.c50320/1/1555.--  | --                             | --        | --          | 21.97   | 14.23   | 0        | 0        | 3.97     | 5.41     | 43.7     | 29.07    | 19.25   | 308.77  | 1762.79 | 813.58 |
| 1-2.c25142/1/1760     | LOC733292 protein [Xenopus     | 68534338  | AAH98985.1  | 26.56   | 7.34    | 34.29    | 70.28    | 33.51    | 28.7     | 76.41    | 47.2     | 79.71   | 0       | 0.05    | 11.54  |
| 1-2.c27666/1/1202 --  | --                             | --        | --          | 2.9     | 0       | 0        | 0        | 0        | 0        | 1.06     | 0.11     | 1.8     | 3.3     | 9.68    | 4.99   |
| 1-2.c4429/2/1350 --   | --                             | --        | --          | 7.39    | 11.52   | 2.33     | 3.64     | 4.17     | 5.33     | 12.38    | 7.28     | 5.79    | 101.51  | 109.57  | 124.07 |
| 2-3.c20773/1/2231     | PREDICTED: myozenin-2 is       | 847087249 | XP_01281675 | 9.61    | 15.27   | 24.54    | 9.58     | 9.57     | 26.36    | 9.09     | 12.39    | 10      | 0.99    | 1.06    | 1.69   |
| 2-3.c11649/15/1952    | cystathionine-beta-synthase [  | 148228062 | NP_00108682 | 26.74   | 71.4    | 24.36    | 18.94    | 17.9     | 39.21    | 24.17    | 14.44    | 14.04   | 3.35    | 3.86    | 2.49   |
| 2-3.c10656/7/2118     | NADH dehydrogenase subun       | 146149047 | YP_00116545 | 8.26    | 0       | 8.78     | 7.04     | 62.34    | 61.01    | 0        | 45.33    | 6.64    | 0       | 0       | 2.58   |
| 3-6.c9920/1/3061.1 -- | --                             | --        | --          | 1.35    | 4.09    | 0        | 1.33     | 0.51     | 3.74     | 8.57     | 0.34     | 2.83    | 123.27  | 47.68   | 52.33  |
| 2-3.c15861/1/11269.-- | --                             | --        | --          | 4.33    | 43.63   | 16       | 22.92    | 14.1     | 15.46    | 3.81     | 16.25    | 8.12    | 1.71    | 1.73    | 1.37   |
| 1-2.c23369/3/1359     | PRPS2 protein, partial [Homo   | 34192133  | AAH30019.2  | 6.27    | 5.08    | 3.33     | 1.88     | 3.77     | 4.75     | 1.11     | 0.99     | 4.22    | 0       | 0       | 0.17   |
| 2-3.c45328/2/1866     | PREDICTED: glycogen phos       | 556954754 | XP_00598898 | 115.87  | 6.82    | 125.49   | 173.23   | 153.01   | 74.43    | 139.77   | 175.69   | 154.54  | 29.46   | 12.15   | 18.03  |
| 2-3.c14473/3/2193     | oxysterol-binding protein-rel  | 71895871  | NP_00102566 | 0       | 0       | 0.33     | 0        | 0        | 0.54     | 1.82     | 0        | 0       | 25.78   | 11.87   | 6.83   |
| 2-3.c63287/1/2282     | staphylococcal nuclease and    | 148234849 | NP_0010796C | 0       | 11.22   | 5.63     | 4.87     | 4.3      | 13.65    | 1.07     | 3.24     | 2.35    | 0       | 0       | 1.01   |
| 1-2.c40055/2/1460     | MGC52527 protein [Xenopus      | 28838469  | AAH47954.1  | 2.66    | 0.88    | 0.48     | 2.59     | 2.55     | 1.27     | 13.51    | 2.73     | 3.49    | 52.79   | 76.62   | 51.51  |
| 1-2.c40820/1/1427 --  | --                             | --        | --          | 11.11   | 34.56   | 2.4      | 16.07    | 7.46     | 53.86    | 42.08    | 11.22    | 19.68   | 522.12  | 735.1   | 469.36 |
| 1-2.c41879/1/1361     | coiled-coil domain-containi    | 56118819  | NP_00100817 | 0       | 0       | 0        | 0        | 0        | 0        | 0        | 0        | 0       | 29.03   | 86.92   | 10.94  |
| 1-2.c27765/1/1343     | PREDICTED: myosin-4 [Xer       | 847156920 | XP_01282446 | 0       | 0       | 94.15    | 28.75    | 17.04    | 0        | 164.65   | 0        | 0       | 0       | 0       | 0      |
| 1-2.c21917/3/1901     | PREDICTED: uncharacterize      | 512834006 | XP_00491352 | 41.73   | 5.49    | 98.86    | 42.79    | 62.39    | 44.36    | 31.84    | 68.34    | 46.09   | 7.97    | 5.02    | 7.86   |
| 1-2.c22438/1/1149     | RecName: Full=Collagen alp     | 18202034  | O42350.1    | 0       | 0       | 0        | 0        | 0        | 0        | 0        | 0        | 0       | 39.83   | 29.63   | 0      |
| 2-3.c1273/120/2345    | LOC398314 protein [Xenopus     | 80477501  | AAI08429.1  | 88.34   | 51.24   | 78.32    | 78.06    | 79.21    | 72.18    | 64.12    | 70.97    | 81      | 9.66    | 10.55   | 12.95  |
| 1-2.c38760/1/7715 --  | --                             | --        | --          | 0       | 0       | 0        | 0        | 0        | 0        | 0        | 0.58     | 0       | 77.36   | 127.76  | 0      |
| 2-3.c7135/13/2612     | PREDICTED: ATP-depende         | 301608355 | XP_00293375 | 4.54    | 8.82    | 9.75     | 5.03     | 4.77     | 0        | 0        | 0        | 3.52    | 0       | 0       | 0      |
| 2-3.c12102/7/2352     | PREDICTED: apoptosis-indu      | 847154756 | XP_01282393 | 0       | 0       | 0        | 0        | 0        | 0        | 2.2      | 6.48     | 0       | 4.77    | 2.88    | 16.45  |
| 2-3.c36368/1/2260     | PREDICTED: autophagy-rel       | 512881983 | XP_00294305 | 12.43   | 12.77   | 17.54    | 9.79     | 14.49    | 26.98    | 5.64     | 18.7     | 10.85   | 0       | 0       | 2.86   |
| 2-3.c35137/1/2478     | GDP dissociation inhibitor 2   | 148234617 | NP_00108023 | 16.71   | 3.33    | 27.93    | 14.9     | 27.78    | 34.56    | 53.28    | 41.4     | 32.98   | 9.36    | 0       | 0.34   |
| 1-2.c4958/1/1619      | PREDICTED: sarcalumenin i      | 847166841 | XP_0128267C | 0.42    | 25.57   | 0        | 0.5      | 2        | 2.41     | 0        | 0.64     | 0.64    | 0       | 0       | 0.1    |
| 3-6.c16974/1/2817     | topoisomerase (DNA) II alph    | 148222806 | NP_0010825C | 0       | 0       | 0        | 0        | 0        | 0        | 2.1      | 0.55     | 0.68    | 11.05   | 27.51   | 4.85   |
| 1-2.c17858/1/1133     | isocitrate dehydrogenase [NA   | 71896117  | NP_00102555 | 10.57   | 1.02    | 10.53    | 7.41     | 7.09     | 35.7     | 3.66     | 4.65     | 3.84    | 0       | 0       | 0.06   |
| 2-3.c13072/1/6138     | pyruvate kinase PKM [Xenop     | 148225037 | NP_00108434 | 0       | 6.13    | 0        | 0        | 0        | 0        | 0        | 0        | 18.14   | 42.22   | 24.12   | 0      |
| 1-2.c21117/2/1689     | obg-like ATPase 1 [Xenopus     | 148228515 | NP_00107968 | 75.02   | 8.16    | 118.66   | 83.11    | 114.85   | 200.62   | 92.36    | 116.19   | 99.69   | 18.69   | 13.01   | 23.78  |
| 1-2.c22339/1/1441     | PREDICTED: actin-related p     | 573898892 | XP_00663717 | 0       | 0       | 0        | 0        | 0        | 0        | 0        | 0        | 0       | 166.16  | 304.82  | 0      |
| 1-2.c11818/4/1447     | PREDICTED: putative solute     | 512834811 | XP_00491363 | 0       | 0       | 12.03    | 0        | 2.48     | 15.19    | 0.05     | 9.21     | 95.69   | 172.34  | 101.47  | 0      |
| 2-3.c54668/1/2064     | PREDICTED: alpha-actinin-      | 558140024 | XP_00611831 | 19.04   | 5.59    | 36.58    | 33.74    | 28.55    | 31       | 24.89    | 25.14    | 30.98   | 4.04    | 3.5     | 4.95   |
| 3-6.c6884/1/3512      | PREDICTED: collagen alpha      | 847166754 | XP_01282667 | 2.24    | 21.38   | 6.02     | 3.79     | 4.77     | 24.6     | 3.25     | 1.74     | 3.45    | 0       | 0       | 0      |
| 2-3.c43189/1/2239.--  | --                             | --        | --          | 14.6    | 4.48    | 7.48     | 11.02    | 5.04     | 2.96     | 20.09    | 7.87     | 8.08    | 155.17  | 240.88  | 163.73 |
| 2-3.c29287/1/1937     | PREDICTED: vitamin K-dep       | 530565501 | XP_0052793C | 20.04   | 15.54   | 0.04     | 0        | 0        | 0        | 0        | 0        | 12.95   | 16.66   | 21.9    | 0      |
| 1-2.c17195/5/1401     | PREDICTED: RING finger p       | 847086255 | XP_01281404 | 0.77    | 4.14    | 9.6      | 0        | 9.62     | 13.86    | 4.52     | 2.25     | 6.64    | 0       | 0       | 0      |
| 1-2.c2683/13/1137     | myosin essential light chain f | 52699568  | AAU86906.1  | 7501.26 | 1517.79 | 13627.67 | 11838.16 | 12903.99 | 11766.81 | 11045.22 | 14223.59 | 9857.66 | 2038.63 | 1063.41 | 2329.9 |
| 1-2.c33564/1/4712     | PREDICTED: cellular nuclei     | 594662064 | XP_00717923 | 11.51   | 62.98   | 29.85    | 0.81     | 33.29    | 58.1     | 0        | 4.37     | 0       | 0       | 0       | 0      |
| 3-6.c13196/2/4133     | PREDICTED: MICOS compl         | 512817128 | XP_00293732 | 25.17   | 17.06   | 32.16    | 25       | 27.91    | 30.01    | 20.26    | 24.03    | 22.84   | 2.9     | 2.93    | 5.67   |
| 2-3.c21281/2/2602 --  | --                             | --        | --          | 0       | 0       | 0.03     | 0        | 0        | 0        | 18.51    | 0        | 0.99    | 21.34   | 0       | 44.29  |
| 2-3.c2721/1/3/2092    | PREDICTED: uncharacterize      | 847119040 | XP_01281681 | 0.82    | 22.99   | 2.53     | 0.67     | 9.57     | 8.86     | 0.63     | 0.82     | 1.43    | 0.12    | 0       | 0.08   |

|                    |                                                                         |           |             |        |        |        |        |        |        |        |        |        |        |        |        |
|--------------------|-------------------------------------------------------------------------|-----------|-------------|--------|--------|--------|--------|--------|--------|--------|--------|--------|--------|--------|--------|
| 2-3.c43847/1/2165  | Dupd1 protein [Xenopus laevis]                                          | 68534444  | AAH99351.1  | 0.82   | 0      | 2.37   | 1.54   | 1.99   | 2.35   | 3.73   | 1.01   | 1.81   | 0.05   | 0      | 0.04   |
| 2-3.e1590/14/2402  | protein NipSnap homolog 2 [Xenopus laevis]                              | 113931288 | NP_00103905 | 51.41  | 46.61  | 60.68  | 62.37  | 57.99  | 62.46  | 37.68  | 34.65  | 54.47  | 7.81   | 4.34   | 13.16  |
| 2-3.e29674/1/2159  | --                                                                      | --        | --          | 62.55  | 54.91  | 117.04 | 45.12  | 50.46  | 156.02 | 32.29  | 42.04  | 49.96  | 1.35   | 0.58   | 5.93   |
| 2-3.c15516/1/2393  | PREDICTED: homocysteine-transporter 1 [Xenopus laevis]                  | 847117414 | XP_01281624 | 0      | 2.91   | 6.45   | 2.86   | 1.52   | 6.19   | 0      | 3.68   | 8.79   | 0      | 0      | 0      |
| 2-3.e2003/10/2542  | PREDICTED: synaptodin [Xenopus laevis]                                  | 512828724 | XP_00293730 | 11.19  | 2.71   | 18     | 10.25  | 13.61  | 12.84  | 4.58   | 8.27   | 16.26  | 0.45   | 1.81   | 2.14   |
| 1-2.c39753/1/1273  | PREDICTED: cysteine protease 1 [Xenopus laevis]                         | 847163930 | XP_01282600 | 0      | 0      | 0      | 1.54   | 0      | 0      | 0      | 0.04   | 0      | 19.48  | 32.43  | 13.55  |
| 1-2.c25338/1/1542  | --                                                                      | --        | --          | 19.46  | 26.79  | 8.89   | 18.7   | 12.01  | 11.29  | 78.91  | 14.06  | 13.24  | 292.48 | 353.48 | 333.47 |
| 3-6.e3048/7/3247   | PREDICTED: mothers against decapentaplegic 1 [Xenopus laevis]           | 512884416 | XP_00492024 | 0.83   | 0      | 0.01   | 0.41   | 1.15   | 1.27   | 1.48   | 0      | 0      | 0      | 0      | 0      |
| 2-3.c62069/1/2481  | Citrate synthase, mitochondrial [Xenopus laevis]                        | 808865946 | KKF16719.1  | 0      | 0      | 0      | 0      | 0      | 0      | 0      | 0      | 6.44   | 9.47   | 0      | 10.21  |
| 1-2.c31032/1/1408  | PREDICTED: sodium/potassium ATPase 1 [Xenopus laevis]                   | 620963907 | XP_00766720 | 0      | 0      | 0      | 0      | 0      | 0      | 0      | 0      | 0      | 14.99  | 15.95  | 0.43   |
| 2-3.e13636/1/2339  | PREDICTED: myocyte-specific protein 1 [Xenopus laevis]                  | 847084858 | XP_01282407 | 4.25   | 6.79   | 4.12   | 4.28   | 7.29   | 10.77  | 5.31   | 2.36   | 4.43   | 1.5    | 0.37   | 0.15   |
| 2-3.c19105/1/2460  | core histone H2A/H2B/H3/H4 [Xenopus laevis]                             | 768197465 | KJH53109.1  | 0      | 0      | 0      | 0      | 5.21   | 4.8    | 0      | 3.57   | 4.61   | 0      | 0      | 0      |
| 1-2.c13457/3/1595  | --                                                                      | --        | --          | 110.92 | 50.8   | 158.37 | 193.31 | 176.71 | 169.09 | 232.32 | 225.97 | 206.48 | 35.28  | 2.18   | 39.08  |
| 2-3.c4345/1/2571   | PREDICTED: eukaryotic translation initiation factor 4E [Xenopus laevis] | 847099370 | XP_01281221 | 72.41  | 95.62  | 46.64  | 20.28  | 44.55  | 44.34  | 3.84   | 17.02  | 47.11  | 0.79   | 0      | 12.7   |
| 1-2.e5473/1/2978.1 | granulin precursor [Xenopus laevis]                                     | 147900546 | NP_00108067 | 64.86  | 20.88  | 47     | 39.43  | 24.09  | 17.27  | 35.29  | 70.83  | 56.58  | 683.91 | 648.12 | 565.83 |
| 1-2.c3872/1/1886   | PREDICTED: DTW domain [Xenopus laevis]                                  | 569004435 | XP_00652627 | 5.8    | 0      | 3.09   | 3.02   | 9.77   | 5.49   | 9.93   | 8.65   | 3.53   | 0      | 0      | 0      |
| 1-2.e44768/2/1734  | cystathionine-beta-synthase [Xenopus laevis]                            | 148228062 | NP_00108682 | 12.1   | 4.2    | 2.9    | 4.44   | 0.76   | 9.94   | 6.61   | 2.83   | 10.87  | 0      | 0      | 0      |
| 1-2.e51604/1/1487  | PREDICTED: sarcolumenin 1 [Xenopus laevis]                              | 512868462 | XP_00293247 | 134.62 | 26.04  | 133.18 | 204.71 | 145.41 | 73.49  | 131.62 | 163.51 | 207.67 | 23.96  | 8.51   | 29.82  |
| 1-2.c6092/1/1609   | PREDICTED: keratin, type II [Xenopus laevis]                            | 698421871 | XP_00981374 | 292.62 | 282.25 | 203.82 | 182.77 | 564.43 | 168.63 | 456.05 | 285.04 | 166.33 | 7.12   | 3.25   | 6.44   |
| 1-2.e9069/1/1775.1 | --                                                                      | --        | --          | 0.92   | 6.26   | 0.78   | 1.7    | 0.87   | 2.39   | 0.98   | 1.75   | 1.73   | 90.42  | 104.14 | 25.61  |
| 3-6.e3475/2/3006.1 | PREDICTED: tenascin isoform 1 [Xenopus laevis]                          | 512858291 | XP_00491677 | 0      | 10.2   | 5.73   | 3.05   | 3.4    | 6.58   | 0.09   | 3.94   | 1.82   | 0      | 0.24   | 0.75   |
| 1-2.e28255/1/1294  | inositol hexakisphosphate kinase 1 [Xenopus laevis]                     | 62859747  | NP_00101595 | 8.57   | 51.77  | 10.03  | 25.08  | 0      | 0.43   | 27.78  | 26.43  | 26.11  | 218.88 | 132.04 | 251.76 |
| 2-3.e10078/1/2189  | uncharacterized protein LOC100000000 [Xenopus laevis]                   | 148227048 | NP_00109015 | 0      | 0      | 0.51   | 0      | 0      | 0      | 0      | 0      | 0      | 3.54   | 4.54   | 0.52   |
| 2-3.e20561/1/2487  | --                                                                      | --        | --          | 4.83   | 8.32   | 2.22   | 6.33   | 1.45   | 5.7    | 24.44  | 4.29   | 8.82   | 136.55 | 154.3  | 113.93 |
| 2-3.c40059/2/2298  | PREDICTED: myosin-7B [Xenopus laevis]                                   | 512871888 | XP_00293293 | 0      | 0      | 0      | 0      | 0      | 0      | 0      | 0      | 0.72   | 5.76   | 16.04  | 2.81   |
| 1-2.e40613/2/1359  | PREDICTED: protein PFC07 [Xenopus laevis]                               | 556961274 | XP_00599098 | 111.93 | 71.11  | 207.27 | 130.47 | 246.16 | 618.78 | 165.67 | 111.74 | 273.99 | 8.33   | 9.07   | 11.02  |
| 2-3.c3209/1/2397.2 | --                                                                      | --        | --          | 0      | 0      | 0      | 0      | 0      | 0      | 2.68   | 0      | 0      | 75.45  | 150.61 | 11.51  |
| 2-3.c23132/1/2256  | ethanolamine-phosphate phosphatase [Xenopus laevis]                     | 147905107 | NP_00108663 | 0.22   | 0      | 0      | 0      | 0.12   | 0.12   | 0.62   | 0      | 0      | 2.84   | 7.51   | 6.18   |
| 1-2.e11925/3/1798  | leucine-rich repeat-containing protein 1 [Xenopus laevis]               | 194332463 | NP_00112373 | 10.21  | 10.29  | 5.85   | 10.17  | 6.76   | 11.17  | 3.18   | 2.36   | 9.21   | 0.62   | 1.44   | 0.72   |
| 1-2.e13714/2/1299  | uncharacterized protein LOC100000000 [Xenopus laevis]                   | 148232024 | NP_00108962 | 0      | 0      | 0      | 0      | 0      | 0      | 1      | 0      | 1.17   | 10.63  | 1.43   | 20.03  |
| 1-2.c3241/1/1389   | PREDICTED: integrin alpha-5 [Xenopus laevis]                            | 556963632 | XP_00599173 | 1.28   | 8.77   | 0.61   | 0.98   | 0      | 3.33   | 0.23   | 0.9    | 2.01   | 39.02  | 27.28  | 49.72  |
| 1-2.e52346/1/1455  | PREDICTED: isocitrate dehydrogenase 1 [Xenopus laevis]                  | 831547357 | XP_01272691 | 1.6    | 0      | 105.35 | 165.54 | 99.95  | 114.01 | 187.92 | 137.82 | 244.19 | 16.31  | 14.48  | 25.23  |
| 1-2.e19337/1/1394  | PREDICTED: phosphoglycerate kinase 1 [Xenopus laevis]                   | 831541829 | XP_01272486 | 13.25  | 0.89   | 10.99  | 15.76  | 9.3    | 6.7    | 7.95   | 17.98  | 1.41   | 0      | 1.33   | 0      |
| 1-2.e29963/1/1482  | epidermal growth factor receptor 1 [Xenopus laevis]                     | 306922368 | NP_00112010 | 0      | 0      | 0.19   | 0.17   | 0      | 0      | 0      | 0      | 1.9    | 7.65   | 9.91   | 3.47   |
| 1-2.e31198/1/1609  | eukaryotic translation initiation factor 4E [Xenopus laevis]            | 187608058 | NP_00112056 | 0      | 0      | 3.24   | 0      | 7.2    | 7.11   | 0      | 0      | 1.13   | 0      | 0      | 0      |
| 1-2.c38882/1/1604  | ARP1 actin-related protein 1 [Xenopus laevis]                           | 148226057 | NP_00108648 | 0      | 0      | 0      | 0      | 0      | 0      | 0      | 1.84   | 0      | 1.99   | 3.56   | 6.31   |
| 1-2.e42978/1/1527  | --                                                                      | --        | --          | 4.46   | 71.67  | 3.81   | 3.04   | 2.74   | 17.25  | 7.19   | 3.78   | 2.8    | 128.39 | 142.94 | 218.91 |
| 2-3.e1492/54/2069  | PREDICTED: interferon-related protein 1 [Xenopus laevis]                | 847109761 | XP_01281444 | 2.72   | 0.12   | 0.96   | 6.47   | 0      | 10.28  | 0.3    | 4.87   | 1.05   | 0      | 0      | 0      |
| 1-2.c36358/1/1699  | Unknown (protein for MGC100000000) [Xenopus laevis]                     | 49257408  | AAH73381.1  | 0      | 25.89  | 3.5    | 6.64   | 5.86   | 0      | 0      | 1.58   | 1.19   | 0      | 0      | 0      |
| 1-2.c30859/2/1704  | pyruvate kinase PKM [Xenopus laevis]                                    | 148225037 | NP_00108434 | 0      | 0      | 0      | 0      | 0      | 0      | 0      | 0      | 0      | 15.76  | 17.15  | 0      |
| 3-6.e13035/2/2987  | major vault protein [Xenopus laevis]                                    | 147903423 | NP_00107993 | 0      | 3.35   | 0      | 0      | 0      | 0      | 0      | 0      | 0      | 11.64  | 8.49   | 0      |
| 2-3.c32790/1/2006  | PREDICTED: protein phosphatase 1 [Xenopus laevis]                       | 301603827 | XP_00293153 | 0.17   | 2.44   | 1.42   | 1.71   | 1.67   | 1.14   | 0.83   | 0.41   | 1.78   | 28.12  | 35.08  | 58.75  |
| 1-2.c28066/1/1451  | --                                                                      | --        | --          | 1.51   | 12.33  | 0.32   | 0.87   | 0.46   | 0.62   | 1.91   | 0      | 0.96   | 23.78  | 38.66  | 12.87  |
| 3-6.e7494/1/2865.1 | PREDICTED: mitogen-activated protein kinase 1 [Xenopus laevis]          | 512866147 | XP_00491777 | 4.65   | 1.02   | 4.55   | 1.82   | 6.53   | 10.2   | 3.86   | 4.21   | 0.5    | 0      | 0.06   | 0.63   |
| 1-2.e4442/3/1736.1 | PREDICTED: RNA-binding protein 1 [Xenopus laevis]                       | 126313602 | XP_00136386 | 23.68  | 36.76  | 1.52   | 10.97  | 7.64   | 8.03   | 0      | 4      | 11.69  | 1.79   | 0      | 0      |
| 2-3.e11906/1/2335  | --                                                                      | --        | --          | 17.96  | 8.05   | 25.34  | 25.36  | 19.21  | 50.94  | 8.01   | 10.5   | 6.96   | 4.49   | 3.96   | 2.25   |
| 1-2.e2909/4/1339   | Xgs protein [Xenopus laevis]                                            | 213623564 | AAI69913.1  | 36.87  | 11.79  | 3.94   | 24.98  | 19.37  | 0      | 41.22  | 25.73  | 29.02  | 456.76 | 321.42 | 277.74 |
| 1-2.e7518/1/1741   | --                                                                      | --        | --          | 0.49   | 0      | 0.7    | 0      | 0      | 0      | 1.2    | 0.89   | 1.87   | 6.82   | 1.08   | 3.64   |
| 1-2.e7587/3/1643   | dusp1 protein [Xenopus (Silurana) laevis]                               | 49257734  | AAH74564.1  | 0      | 0      | 0      | 0      | 0      | 0      | 0      | 0      | 0      | 27.07  | 18.22  | 0      |
| 3-6.e6377/1/2921   | H(+)/Cl(-) exchange transporter 1 [Xenopus laevis]                      | 113931518 | NP_00103921 | 0.34   | 0      | 0      | 0.35   | 1.46   | 1.23   | 1.2    | 0.62   | 0      | 0      | 0      | 0      |
| 3-6.e9802/1/3496   | PREDICTED: band 4.1-like protein 1 [Xenopus laevis]                     | 847168910 | XP_01280820 | 11.12  | 24.79  | 10.26  | 5.31   | 7.46   | 2.19   | 1.93   | 5.07   | 3.6    | 0      | 0.5    | 1.07   |
| 1-2.e20966/1/1472  | solute carrier family 3, member 1 [Xenopus laevis]                      | 148229024 | NP_00108024 | 0      | 6.55   | 5.8    | 32.46  | 14.29  | 1.37   | 13.28  | 0      | 25.6   | 0      | 0      | 0      |
| 1-2.e2657/8/1384   | uncharacterized protein LOC100000000 [Xenopus laevis]                   | 148232016 | NP_00109117 | 0      | 0      | 0      | 0      | 0      | 0      | 0      | 0      | 0      | 49.88  | 96.73  | 0      |
| 2-3.e26979/1/1800  | solute carrier family 2 (facilitated) member 1 [Xenopus laevis]         | 147902370 | NP_00108560 | 0      | 1.5    | 0      | 0      | 0      | 0      | 0      | 0      | 0      | 6.32   | 49.86  | 16.83  |
| 1-2.c33276/1/1492  | --                                                                      | --        | --          | 6.02   | 10.88  | 0      | 0      | 0      | 0      | 0      | 0      | 0      | 20.47  | 0.13   | 16.73  |
| 2-3.e3775/4/2100   | PREDICTED: myomegalin-like protein 1 [Xenopus laevis]                   | 591373231 | XP_00706131 | 2.17   | 8.25   | 0      | 8.76   | 0      | 7.67   | 13.95  | 0      | 2.59   | 0      | 0      | 0      |
| 3-6.e16971/1/2756  | PREDICTED: neuroblast differentiation factor 1 [Xenopus laevis]         | 847171283 | XP_01280904 | 9.29   | 0      | 0.34   | 0.73   | 0      | 0      | 6.46   | 3.51   | 0      | 10.04  | 7.99   | 9.55   |
| 1-2.c4760/2/1412   | PREDICTED: adipocyte enhancer 1 [Xenopus laevis]                        | 847115150 | XP_01281556 | 0      | 0      | 3.22   | 0      | 0      | 0      | 3.1    | 0      | 0      | 2.48   | 6.07   | 5.63   |

|                     |                                  |           |             |         |        |         |         |         |         |         |         |         |         |         |        |        |        |
|---------------------|----------------------------------|-----------|-------------|---------|--------|---------|---------|---------|---------|---------|---------|---------|---------|---------|--------|--------|--------|
| 1-2.c32963/2/1670   | PREDICTED: eukaryotic tra        | 847089040 | XP_01282181 | 0       | 0      | 0       | 0       | 0       | 0       | 0       | 0       | 0       | 0       | 0       | 2.12   | 6.86   | 2.25   |
| 1-2.e7952/1/1254.1  | larval type I keratin [Rana cat  | 134140868 | ABO61147.1  | 1383.21 | 225.25 | 311.26  | 727.83  | 849.96  | 147.37  | 656.89  | 310.24  | 219.68  | 20.51   | 40.52   | 219.68 | 20.51  | 23.55  |
| 2-3.e27671/1/2376.  | signal transducer and activator  | 148232026 | NP_00108467 | 17.32   | 1.65   | 1.72    | 3.37    | 6.93    | 1.86    | 11.92   | 4.09    | 13.04   | 127.44  | 145.18  | 127.44 | 145.18 | 57.73  |
| 1-2.c13589/1/1526   | myosin, light chain 1, alkali, j | 374533792 | AEZ53809.1  | 834.74  | 385.48 | 1921.93 | 1356.84 | 1516.35 | 2261.34 | 1706.92 | 2023.02 | 1313.45 | 299.45  | 198.13  | 299.45 | 198.13 | 297.55 |
| 2-3.e21143/1/2514.i | glyceraldehyde-3-phosphate c     | 300679438 | ADK27487.1  | 0       | 0      | 0       | 0       | 0       | 0       | 0       | 0       | 0       | 1205.25 | 4121.26 | 0      | 0      |        |
| 1-2.c35656/1/1300   | myosin, heavy chain 4, skelet    | 47575800  | NP_00100124 | 0       | 0.41   | 25.82   | 10.66   | 8.48    | 0       | 11.09   | 0       | 0       | 0       | 0       | 0      | 0      | 0      |
| 2-3.c20801/1/2095   | unnamed protein product [Me      | 90083332  | BAE90748.1  | 7.77    | 19.17  | 7.55    | 6.91    | 10.13   | 12.53   | 5.38    | 3.03    | 7.63    | 1.65    | 0.39    | 1.65   | 0.39   | 1.15   |
| 1-2.c38826/1/1418   | PREDICTED: lysine-specific       | 637270584 | XP_00810320 | 0       | 0      | 0       | 0.21    | 0       | 0       | 1.08    | 1       | 0.13    | 8.28    | 17.71   | 8.28   | 17.71  | 5.86   |
| 1-2.c49435/1/1592   | integral membrane protein Gi     | 187608073 | NP_00112016 | 0       | 0      | 0       | 0       | 0       | 0       | 0       | 0       | 0       | 5.86    | 12.64   | 5.86   | 12.64  | 1.96   |
| 2-3.c28612/1/1899   | --                               | --        | --          | 1.77    | 0.74   | 4.23    | 10.55   | 8.43    | 1.36    | 5.42    | 2.84    | 5.72    | 0.29    | 0       | 0.29   | 0      | 0.17   |
| 1-2.c36703/1/1476   | PREDICTED: guanine nucle         | 620975525 | XP_00766788 | 31.48   | 81.76  | 22.51   | 36.02   | 19.08   | 18      | 17.56   | 13.86   | 24.27   | 0       | 0       | 0      | 0      | 8.31   |
| 3-6.e16141/1/3594   | PREDICTED: zinc finger CC        | 301609401 | XP_00293425 | 5.41    | 2.93   | 2.77    | 3.63    | 5.04    | 3.71    | 2.17    | 2.23    | 2.44    | 0       | 0.41    | 0      | 0.41   | 0.78   |
| 1-2.c2670/3/1814.1  | --                               | --        | --          | 2.57    | 0.01   | 0.02    | 0       | 0.8     | 0.05    | 0.87    | 1.77    | 1.01    | 5.06    | 26.02   | 5.06   | 26.02  | 29.69  |
| 1-2.e6446/1/5773.1  | --                               | --        | --          | 2.83    | 12.43  | 0       | 1.48    | 0.41    | 4.32    | 6.15    | 1.45    | 1.95    | 61.18   | 96.3    | 61.18  | 96.3   | 30.51  |
| 1-2.e25313/1/1741   | PREDICTED: vitamin D3 hy         | 847119946 | XP_01281704 | 0       | 0      | 0       | 0       | 0       | 0       | 1.91    | 0       | 0       | 28.01   | 62.55   | 28.01  | 62.55  | 4.96   |
| 1-2.c48959/1/1555   | --                               | --        | --          | 2.88    | 18.33  | 0.73    | 6.32    | 3.7     | 1.83    | 17.96   | 11.65   | 0.69    | 41.88   | 150.51  | 41.88  | 150.51 | 173.98 |
| 2-3.e29689/1/1899   | Keratin, type II cytoskeletal c  | 677541627 | KFR03099.1  | 0       | 0      | 0       | 0       | 0       | 0       | 0       | 0       | 0       | 14.57   | 19.91   | 0      | 0      | 0      |
| 2-3.e59469/1/2000   | ORF2 [Acanthochelys spixii]      | 6576738   | BAA88337.1  | 0.57    | 1.9    | 0.21    | 1.65    | 0.6     | 0.4     | 6.63    | 0       | 0.86    | 33.36   | 35.89   | 33.36  | 35.89  | 36.48  |
| 2-3.e59506/1/5587   | PREDICTED: H/ACA ribom           | 543368307 | XP_00552745 | 11.51   | 86.08  | 5.95    | 20.82   | 7.71    | 18.42   | 8.5     | 8.44    | 6.06    | 0.61    | 0.27    | 0.61   | 0.27   | 4.54   |
| 3-6.e1659/30/3423   | PREDICTED: PDZ and LIM           | 847087387 | XP_01281714 | 2.59    | 1.39   | 7.54    | 17.42   | 11.38   | 11.23   | 8.74    | 4.8     | 10.22   | 1.95    | 0.88    | 1.95   | 0.88   | 2.57   |
| 3-6.e7761/2/3419    | PREDICTED: importin-5 iso        | 847100607 | XP_01281263 | 5.76    | 8.64   | 6.33    | 4.22    | 5.26    | 6.75    | 3.91    | 4.15    | 4.01    | 0.44    | 0.62    | 0.44   | 0.62   | 0.74   |
| 3-6.e18515/1/2956   | PREDICTED: myomesin-1 [          | 512850290 | XP_00293895 | 3.5     | 1.68   | 16.37   | 10.12   | 13.69   | 17.68   | 10.73   | 9.06    | 9.57    | 1.11    | 0.15    | 1.11   | 0.15   | 3.71   |
| 1-2.e19906/3/1557   | PREDICTED: aldehyde oxid         | 847167054 | XP_00293776 | 5.44    | 9.34   | 5.93    | 8.68    | 11.87   | 11.58   | 23.65   | 14.88   | 15.61   | 134.39  | 202.4   | 15.61  | 134.39 | 352.56 |
| 1-2.e27892/1/5516   | LOC398627 protein [Xenopus       | 83318199  | AAI08446.1  | 2.14    | 0      | 0       | 0       | 0       | 0       | 0       | 0.99    | 0.89    | 47      | 49.92   | 47     | 49.92  | 0      |
| 1-2.c30708/4/1460   | PREDICTED: splicing factor       | 637335070 | XP_00811537 | 0       | 0      | 0       | 10.01   | 13.42   | 23.86   | 2.16    | 4.34    | 18.49   | 3.19    | 1.77    | 3.19   | 1.77   | 0.64   |
| 1-2.e33601/1/10937  | translation elongation factor l  | 11228569  | AAG33072.1  | 0       | 201.15 | 148.89  | 89.79   | 50.03   | 0       | 0       | 0       | 46.88   | 0       | 0       | 0      | 0      | 0      |
| 1-2.e8392/7/1247    | LIM domain-binding protein       | 45360839  | NP_989095.1 | 34.05   | 10.73  | 112.35  | 71.97   | 105.32  | 98.87   | 63.39   | 54.12   | 80.93   | 12.1    | 2.33    | 12.1   | 2.33   | 24.41  |
| 2-3.e11906/1/2335   | --                               | --        | --          | 0.65    | 0      | 3.72    | 0.69    | 2.07    | 4.82    | 1.08    | 0.43    | 0       | 0       | 0       | 0      | 0      | 0      |
| 2-3.e30253/1/2123   | alternative protein ATP1B1 [     | 440575751 | CCO13684.1  | 0       | 0      | 0.27    | 0       | 0.53    | 0       | 0.9     | 1.99    | 0       | 3.99    | 13.79   | 3.99   | 13.79  | 8.48   |
| 2-3.c30837/1/2282   | --                               | --        | --          | 3.47    | 6.2    | 4.65    | 4.39    | 2.88    | 3.82    | 0.62    | 2.26    | 6.87    | 0       | 0.25    | 0.25   | 0.25   | 0.49   |
| 2-3.c39921/1/2459   | PREDICTED: cytoplasmic d         | 530648788 | XP_00531093 | 0       | 0      | 0       | 0       | 0       | 0       | 0       | 0       | 0.2     | 8.89    | 9.62    | 0      | 0      | 0      |
| 2-3.e54323/1/2232   | PREDICTED: protein phosph        | 591348122 | XP_00705272 | 0       | 0      | 0       | 0       | 0       | 0       | 2       | 0       | 1.23    | 4.63    | 2.14    | 0      | 0      | 0      |
| 3-6.e16034/1/3528   | periostin precursor [Xenopus     | 163915007 | NP_00110637 | 0       | 4.1    | 9.64    | 0       | 5.54    | 3.93    | 0       | 0       | 2.29    | 0       | 0       | 0      | 0      | 0      |
| 2-3.e19233/1/2458   | PREDICTED: keratin-associ        | 767897549 | XP_01150701 | 2.29    | 2.51   | 4.77    | 7.62    | 3.29    | 3.75    | 4.47    | 2.68    | 6.4     | 133.08  | 230.66  | 6.4    | 133.08 | 79.31  |
| 2-3.e1622/29/2043   | PREDICTED: beta-taxilin [F       | 410960156 | XP_00398666 | 0.48    | 4.91   | 23.46   | 32.63   | 45.55   | 18.93   | 0       | 28.93   | 0       | 0       | 0.44    | 0      | 0.44   | 12.32  |
| 1-2.e2790/3/1646    | caveolin 3, gene 2 [Xenopus t    | 156717622 | NP_00109635 | 29.74   | 20.86  | 51.08   | 19.6    | 28.51   | 46.99   | 22.2    | 33.39   | 44.13   | 3.09    | 4.63    | 3.09   | 4.63   | 5.34   |
| 1-2.e5980/1/1544    | --                               | --        | --          | 3.65    | 1.51   | 0       | 2.63    | 0       | 0.54    | 7.86    | 3.41    | 9.05    | 28.46   | 30.99   | 28.46  | 30.99  | 32.58  |
| 1-2.e15012/1/1365   | --                               | --        | --          | 0       | 0      | 0       | 0       | 0       | 0       | 0       | 0       | 0       | 17.75   | 19.16   | 0      | 0      | 0      |
| 2-3.c60612/1/2582   | --                               | --        | --          | 20.8    | 7.77   | 0       | 3.54    | 0       | 3.27    | 13.68   | 0       | 0       | 75.42   | 86.07   | 75.42  | 86.07  | 31.94  |
| 2-3.e1591/42/1902   | ATP synthase subunit alpha, i    | 71896075  | NP_00102561 | 1219.55 | 445.17 | 849.6   | 785.41  | 889.62  | 482.82  | 470.07  | 702.59  | 657     | 105.87  | 96.66   | 105.87 | 96.66  | 151.86 |
| 1-2.e18400/1/1340   | heterogeneous nuclear ribonu     | 154147563 | NP_00109375 | 0       | 0      | 0       | 2.42    | 0       | 0       | 14.29   | 0       | 4.15    | 38.86   | 45.14   | 4.15   | 38.86  | 11.81  |
| 1-2.e29585/1/14478  | PREDICTED: elongation fac        | 700374727 | XP_00993830 | 0.79    | 9.6    | 4.04    | 6.74    | 4.07    | 3.18    | 4.05    | 4       | 3.83    | 0       | 0       | 0      | 0      | 0      |
| 1-2.c3892/1/1437    | PREDICTED: suppressor of t       | 847154706 | XP_01282391 | 0       | 0      | 0       | 0       | 0       | 0       | 0       | 0       | 1.34    | 16.78   | 18.92   | 1.34   | 16.78  | 0      |
| 2-3.c36070/1/2036   | --                               | --        | --          | 16.66   | 5.06   | 45.25   | 17.42   | 21.44   | 35.72   | 19.21   | 19.28   | 23.01   | 3.94    | 2.5     | 3.94   | 2.5    | 3.87   |
| 1-2.e5430/5/1442    | --                               | --        | --          | 2.55    | 0      | 0       | 0       | 0       | 9.2     | 17.95   | 4.95    | 0       | 64.44   | 105.88  | 64.44  | 105.88 | 38.72  |
| 1-2.c32954/1/1318   | cathepsin B precursor [Xenopus   | 45361295  | NP_989225.1 | 142.31  | 74.74  | 24.28   | 68.98   | 0       | 23.84   | 104.71  | 69.31   | 88.84   | 813.95  | 515.71  | 88.84  | 813.95 | 626.48 |
| 3-6.e15662/1/2682   | PREDICTED: fermitin fami         | 512861543 | XP_00491721 | 14.38   | 15.49  | 17.54   | 12.15   | 9.79    | 9.9     | 6.42    | 8.08    | 9.32    | 0.82    | 1.27    | 0.82   | 1.27   | 1.96   |
| 2-3.e5225/2/1911    | dermatopontin precursor [Xenopus | 71896109  | NP_00102555 | 12.35   | 22.47  | 27.24   | 19.25   | 18.75   | 34.27   | 15.5    | 7.81    | 18.16   | 5.99    | 0.48    | 5.99   | 0.48   | 3.2    |
| 1-2.e25758/1/1561   | PREDICTED: septin 10 isofo       | 847099625 | XP_01281230 | 5.52    | 16.33  | 4.54    | 0       | 0.01    | 0       | 6.97    | 0       | 2.99    | 12.19   | 0       | 2.99   | 0      | 14.08  |
| 2-3.e34429/1/1925   | PREDICTED: collagen alpha        | 591360730 | XP_00705528 | 0.34    | 0      | 8.87    | 5.4     | 3.54    | 10.19   | 1.81    | 5.46    | 9.78    | 1.72    | 0       | 0      | 0      | 0      |
| 1-2.e11013/1/1407   | proteasome activator comple      | 156717318 | NP_00109620 | 3.33    | 24.97  | 4.34    | 3.85    | 4.3     | 9.61    | 5.66    | 3.19    | 0       | 0.41    | 0       | 0.41   | 0      | 0.55   |
| 1-2.e16950/1/1772   | aldehyde dehydrogenase fami      | 113931284 | NP_00103908 | 3.67    | 6.71   | 3.29    | 4.3     | 5.68    | 2.29    | 0       | 1.99    | 2.12    | 0.76    | 0       | 0.76   | 0      | 0      |
| 2-3.e12028/1/2198   | --                               | --        | --          | 4.15    | 17.09  | 10.99   | 7.83    | 9.27    | 22.95   | 8.78    | 5.37    | 7.13    | 0       | 0.48    | 0      | 0.48   | 3.28   |
| 2-3.e43339/1/2437   | PREDICTED: ras-related pro       | 795342433 | XP_01178278 | 0       | 2.14   | 0       | 1.86    | 0       | 2.66    | 0       | 0       | 12.51   | 24.53   | 32.64   | 24.53  | 32.64  | 52     |
| 3-6.e2301/16/2888   | PREDICTED: probable threo        | 591363151 | XP_00705648 | 2.62    | 2.23   | 4.54    | 0.89    | 2.22    | 1.64    | 0.3     | 1.65    | 0.4     | 0.14    | 0       | 0.4    | 0.14   | 0      |
| 1-2.e35504/3/1329   | hedgehog acyltransferase-like    | 147901798 | NP_00107945 | 0       | 3.28   | 0       | 0       | 0       | 0       | 0.03    | 5.8     | 0       | 18.89   | 23.33   | 0      | 0      | 0      |
| 1-2.e49784/1/1608   | PREDICTED: heterogeneous         | 847142386 | XP_01282156 | 5.82    | 0      | 0       | 0       | 0       | 0       | 0       | 0       | 1.79    | 14.11   | 16.11   | 1.79   | 14.11  | 0      |
| 2-3.c1679/15/2396   | heat shock 70 kDa protein 14     | 62751575  | NP_00101578 | 0       | 17.05  | 1.19    | 0       | 4       | 4.9     | 1.55    | 0.91    | 1.76    | 0       | 0       | 0      | 0      | 0      |

|                    |                                 |           |             |         |        |         |         |         |         |         |         |         |        |        |         |
|--------------------|---------------------------------|-----------|-------------|---------|--------|---------|---------|---------|---------|---------|---------|---------|--------|--------|---------|
| 2-3.c15478/1/2388  | sarcoplasmic/endoplasmic ret    | 383511148 | AFH40438.1  | 7155.65 | 806.19 | 6426.29 | 7773.4  | 9682.35 | 5223.48 | 4200.18 | 7215.24 | 5571.86 | 820.94 | 486.97 | 2257.59 |
| 1-2.c31640/2/1222  | PREDICTED: glucose-6-pho        | 704456039 | XP_01008651 | 0       | 0      | 0       | 0       | 23.83   | 118.47  | 33.22   | 0       | 245.44  | 291.51 | 85.67  |         |
| 2-3.c19330/1/2401  | --                              | --        | --          | 5.58    | 3.03   | 7.92    | 4.59    | 4.8     | 13.15   | 6.24    | 1.63    | 0.59    | 0.75   | 0.79   | 0.52    |
| 1-2.c16396/4/1445  | Short-chain specific acyl-Co/   | 226372490 | ACO51870.1  | 11.52   | 5.94   | 9.83    | 6.49    | 7.46    | 6.25    | 2.96    | 10.56   | 5.86    | 1.58   | 0      | 0       |
| 2-3.c2672/3/2208   | PREDICTED: collagen alpha       | 847156838 | XP_01282444 | 2.98    | 22.5   | 3.73    | 1.58    | 0.2     | 2.55    | 1.62    | 1.22    | 3.18    | 0      | 0      | 0       |
| 1-2.c45689/1/1233  | PREDICTED: heterogeneous        | 704176135 | XP_01013362 | 0       | 60.74  | 3.64    | 0       | 10.37   | 16.9    | 0       | 1.69    | 0       | 0      | 0      | 0       |
| 2-3.c23478/1/5379  | calsequestrin 1 (fast-twitch, s | 148231736 | NP_00108022 | 1843.97 | 280.28 | 3093.72 | 2285.41 | 2991.73 | 2565.74 | 1682.38 | 2494.75 | 2381.07 | 398.04 | 155.52 | 684.71  |
| 2-3.c47840/1/2313  | beta-hexosaminidase subunit     | 187607505 | NP_00112060 | 1.21    | 1.18   | 0.88    | 1.13    | 0.58    | 0.3     | 3.25    | 1.5     | 1.82    | 28.2   | 24.94  | 24.76   |
| 1-2.c4663/1/1466   | heavy chain 6 cardiac muscle    | 388242704 | AFK15622.1  | 0.99    | 6.96   | 1.56    | 3.92    | 0.24    | 3.56    | 1.8     | 0       | 2.57    | 0      | 0      | 0       |
| 1-2.c27092/95/1390 | uncharacterized protein LOC     | 45361313  | NP_989234.1 | 224.88  | 79.76  | 218.56  | 156.09  | 143.8   | 40.89   | 55.82   | 99.16   | 140.46  | 6.13   | 4.6    | 21.23   |
| 2-3.c4491/1/2343   | RecName: Full=Low density       | 73921717  | Q67FQ3.1    | 0       | 0.47   | 0       | 0       | 0       | 0       | 0       | 0.55    | 0       | 3.47   | 0.46   | 3.39    |
| 2-3.c8421/2/2274   | PREDICTED: regenerating is      | 301610175 | XP_00293462 | 6.47    | 0.12   | 5.85    | 14.17   | 7.02    | 10.38   | 5.6     | 4.38    | 0.12    | 0      | 0.09   | 3.26    |
| 1-2.c22994/1/1268  | zinc finger protein 9 (a cellu  | 89269563  | CAJ82604.1  | 0       | 0      | 0       | 0       | 0       | 0       | 0       | 0       | 0       | 7.98   | 3.11   | 4.17    |
| 1-2.c6130/1/1349   | PREDICTED: glycogen phos        | 512834332 | XP_00293541 | 6.82    | 3.18   | 77.55   | 21.51   | 42.06   | 16.88   | 39.32   | 31.18   | 39.32   | 9.38   | 1.04   | 0       |
| 2-3.c46091/1/2509  | PREDICTED: blood vessel e       | 847126715 | XP_01281814 | 14.94   | 17.53  | 18.79   | 16.76   | 10.18   | 30.56   | 9.51    | 8.58    | 11.67   | 1.91   | 10.08  | 3.21    |
| 1-2.c12033/3/1528  | PREDICTED: dihydrolipoyl        | 602630522 | XP_00742217 | 41.28   | 12.39  | 24.87   | 23.32   | 19.2    | 29.17   | 19.42   | 15.32   | 17.71   | 2.13   | 5.92   | 2.28    |
| 2-3.c44694/61/2377 | Keratin, type II cytoskeletal c | 697450143 | KGL89199.1  | 132.35  | 156.62 | 82.79   | 83.74   | 304.91  | 82.9    | 175.84  | 141.55  | 83.88   | 1.34   | 1.5    | 1.96    |
| 1-2.c2952/17/1571  | PDZ and LIM domain 7 (enig      | 148223185 | NP_00108073 | 6.79    | 12.2   | 34.9    | 18.43   | 22.71   | 37.25   | 30.08   | 30.51   | 21.49   | 3.68   | 2.14   | 4.59    |
| 3-6.c15928/1/2713  | PREDICTED: amyloid beta /       | 847099265 | XP_01281217 | 0       | 9.5    | 6.54    | 0.01    | 4.64    | 3.76    | 0       | 0       | 2.15    | 0      | 0      | 0       |
| 1-2.c41590/1/1590  | PREDICTED: protein PFC07        | 556961274 | XP_00599098 | 1.96    | 0.44   | 5.77    | 2.33    | 4.15    | 9.91    | 2.49    | 1.68    | 2.97    | 0      | 0.18   | 0.46    |
| 2-3.c21891/1/2417  | --                              | --        | --          | 1.32    | 7.58   | 1.84    | 1.33    | 2.76    | 3.7     | 1.11    | 0.88    | 0.29    | 0      | 0      | 0.34    |
| 1-2.c39875/1/1400  | PREDICTED: nuclear transcr      | 847086080 | XP_01281352 | 0       | 0      | 0.9     | 0       | 0       | 0       | 0       | 0.79    | 0       | 5.14   | 6.18   | 2.45    |
| 1-2.c50556/2/1401  | PREDICTED: histone acetyl       | 847162472 | XP_01282552 | 0.23    | 12.45  | 0       | 0.72    | 0       | 0.08    | 2.42    | 3.6     | 6.83    | 15.93  | 13.78  | 8.42    |
| 3-6.c3547/3/3060   | PREDICTED: CCAAT/enhar          | 847126903 | XP_01281820 | 1.09    | 1.82   | 0.67    | 0.87    | 2.84    | 4.8     | 2.28    | 0       | 0.03    | 0.11   | 0      | 0.28    |
| 1-2.c50400/1/1690  | --                              | --        | --          | 0.64    | 3.62   | 0.28    | 1.15    | 0.47    | 0.93    | 3.27    | 0.84    | 1.07    | 17.46  | 15.57  | 37.45   |
| 3-6.c8716/3/3260   | PREDICTED: cell division c      | 641789631 | XP_00530046 | 0.44    | 12.21  | 1.67    | 1.03    | 1.64    | 4.97    | 0       | 0.41    | 0.78    | 0      | 0      | 0.08    |
| 1-2.c11007/1/1751  | --                              | --        | --          | 11.64   | 4.58   | 0       | 6.66    | 0.39    | 3.27    | 20.73   | 14.24   | 12.07   | 70.57  | 77.19  | 81.74   |
| 1-2.c19922/1/1341  | --                              | --        | --          | 1.55    | 1.94   | 0       | 0.39    | 0       | 0.74    | 0       | 0.26    | 2.83    | 16.54  | 17.46  | 11.69   |
| 1-2.c22401/1/1500  | cortixin-3 [Xenopus (Siluran    | 351542156 | NP_00116515 | 5.54    | 10.11  | 10.52   | 4.17    | 6.67    | 10.09   | 6.74    | 4.4     | 6.44    | 0.27   | 0.31   | 0.22    |
| 1-2.c7064/4/1773.1 | PREDICTED: monoamine ox         | 847098632 | XP_01281195 | 2.18    | 0.91   | 1.77    | 1.73    | 1.57    | 2.82    | 2.17    | 3.78    | 1.98    | 33.54  | 49.9   | 72.73   |
| 2-3.c27334/1/2262  | --                              | --        | --          | 1.38    | 15.02  | 1.86    | 2.21    | 1.36    | 6.49    | 5.1     | 0.65    | 3.08    | 57.51  | 86.64  | 69.47   |
| 2-3.c62865/3/2333  | PREDICTED: zinc finger anc      | 301618660 | XP_00293871 | 2.66    | 7.87   | 3.33    | 2.92    | 5.57    | 4.42    | 0.01    | 2.56    | 2.52    | 0      | 0      | 0.87    |
| 1-2.c35572/1/9289  | novel aldo-keto reductase fa    | 113931624 | NP_00103926 | 0       | 0      | 0       | 0       | 0       | 0       | 0       | 0       | 7.79    | 11.17  | 5.01   |         |
| 2-3.c32721/1/10210 | --                              | --        | --          | 9.55    | 24.81  | 12.17   | 8.66    | 11.7    | 16.63   | 2.38    | 5.45    | 17.82   | 1.04   | 0.61   | 1.37    |
| 1-2.c49578/1/1822  | RNA-binding protein VgRBF       | 147902659 | NP_00108391 | 0       | 1.47   | 0       | 0       | 0       | 1.8     | 3.69    | 0       | 5.05    | 19.62  | 23.4   | 9.24    |
| 1-2.c6867/1/1642   | PREDICTED: choline/ethano       | 558142258 | XP_00609261 | 0       | 0.08   | 0.97    | 0       | 0       | 0       | 0.83    | 0       | 0       | 1.97   | 6.14   | 3.06    |
| 2-3.c47700/1/2052  | --                              | --        | --          | 0       | 0      | 0       | 0       | 3.06    | 0.72    | 0       | 0       | 5.4     | 60.06  | 69.32  | 29.53   |
| 1-2.c29177/1/1201  | PREDICTED: myomesin-2 is        | 847130012 | XP_01281893 | 70.79   | 89.25  | 155.59  | 251.89  | 138.96  | 222.23  | 143.54  | 127.63  | 174.31  | 42.58  | 12.05  | 41.88   |
| 2-3.c60646/1/2634  | PREDICTED: fermitin famil       | 512861543 | XP_00491721 | 2.13    | 3.62   | 7.28    | 2.07    | 2.88    | 3.06    | 1.94    | 1.98    | 2.01    | 0.13   | 0.09   | 0.26    |
| 1-2.c8211/2/1309   | phosphatidylinositol transfer   | 147903972 | NP_00108027 | 0       | 0      | 0       | 0       | 0       | 0       | 0       | 0       | 0       | 17.83  | 16.14  | 0       |
| 2-3.c39049/1/1894  | --                              | --        | --          | 0       | 0      | 0       | 0       | 0       | 0       | 0       | 0       | 0       | 3.81   | 4.79   | 0.59    |
| 1-2.c36260/1/1373  | glutaryl-CoA dehydrogenase      | 148225687 | NP_00108662 | 0       | 0      | 0       | 0       | 0       | 0       | 0       | 0       | 0       | 15.03  | 15.18  | 0       |
| 1-2.c21881/45/1546 | PREDICTED: tartrate-resista     | 847170157 | XP_01280861 | 1.94    | 0.71   | 0.27    | 0.82    | 0       | 0       | 0.5     | 0.31    | 0.75    | 7.96   | 16.68  | 13.22   |
| 1-2.c4313/1/1288   | heterogeneous nuclear ribonu    | 89272515  | CAJ81560.1  | 2.68    | 39.16  | 6.85    | 4.19    | 5.12    | 14.01   | 2.5     | 3.05    | 3.18    | 0.53   | 0.18   | 0.6     |
| 1-2.c46751/1/5313  | PREDICTED: ATP synthase         | 670982575 | XP_00868185 | 0       | 0      | 0       | 0       | 0       | 0       | 0       | 0       | 0       | 129.82 | 311.75 | 0       |
| 3-6.c14511/1/4710  | alpha 1 type I collagen [Rana   | 3242649   | BAA29028.1  | 0.94    | 23.92  | 5.56    | 3.21    | 6.01    | 15.14   | 1.72    | 1.68    | 3.75    | 0.27   | 0      | 0.46    |
| 2-3.c19308/1/2127  | PREDICTED: sodium-indepe        | 512873189 | XP_00293735 | 1.67    | 0      | 0.16    | 0.44    | 0       | 1.12    | 3.31    | 1.94    | 7.38    | 5.12   | 9.7    | 9.7     |
| 2-3.c36455/2/2037  | PREDICTED: LOW QUALI            | 803125841 | XP_00401312 | 11.66   | 1.92   | 12.92   | 17.92   | 27.46   | 10.57   | 17.97   | 12.61   | 11.11   | 2.92   | 0      | 4.69    |
| 2-3.c8521/4/2228   | ubiquilin-1 [Xenopus (Siluran   | 45361287  | NP_989221.1 | 5.82    | 0      | 0.71    | 3.12    | 3.11    | 3.37    | 0.21    | 0.24    | 0       | 0      | 0.7    | 0       |
| 2-3.c26945/1/2424  | uncharacterized protein LOC     | 147898849 | NP_00109041 | 0.35    | 2.67   | 1.23    | 2.79    | 1.46    | 1.91    | 0       | 0.53    | 0.62    | 0      | 0      | 0       |
| 2-3.c12572/3/2352  | PREDICTED: baculoviral IA       | 847099212 | XP_01281215 | 19.02   | 7.43   | 7.2     | 7.45    | 0       | 0       | 14.74   | 8.45    | 22.13   | 39.02  | 54.46  | 74.02   |
| 1-2.c16946/1/1389  | adenylosuccinate lyase [Xenc    | 148226240 | NP_00108055 | 0       | 0      | 0       | 0       | 0       | 0       | 0       | 0       | 0       | 5.16   | 11.45  | 1.95    |
| 1-2.c43683/1/1584  | PREDICTED: cold shock dot       | 847087986 | XP_01281925 | 0       | 0      | 0       | 0       | 0       | 0       | 0       | 0       | 0       | 14.41  | 12.41  | 0       |
| 2-3.c3663/2/2238   | ppp1r3a protein [Xenopus (S     | 117558559 | AAI27365.1  | 4.44    | 0.36   | 4.15    | 5.49    | 3.63    | 2.05    | 2.58    | 0       | 3.4     | 0.58   | 0.35   | 0       |
| 3-6.c4883/1/3272   | PREDICTED: glucocorticoid       | 847109993 | XP_01281452 | 0.7     | 0      | 1.58    | 2.27    | 2.35    | 0       | 0       | 0       | 0       | 0      | 0      | 0       |
| 1-2.c40711/1/1869  | Calnexin, partial [Anas platyr  | 483507247 | EOA97896.1  | 0       | 0      | 0       | 0       | 0       | 6.39    | 0       | 0       | 0       | 15.34  | 7.55   | 1.16    |
| 2-3.c11984/1/1932  | ppp1r3a protein [Xenopus (S     | 117558559 | AAI27365.1  | 8.88    | 2.39   | 7.04    | 10.24   | 9.98    | 6.35    | 3.53    | 0.13    | 9.04    | 0.09   | 2.99   | 0.39    |
| 3-6.c2265/17/3059  | PREDICTED: large subunit C      | 507699078 | XP_00464405 | 3.16    | 5.63   | 1.24    | 2.09    | 2.68    | 6.22    | 1.6     | 2.38    | 1.35    | 0      | 0.4    | 0.55    |

|                    |                                 |           |             |        |        |        |        |        |        |        |        |        |        |        |        |   |
|--------------------|---------------------------------|-----------|-------------|--------|--------|--------|--------|--------|--------|--------|--------|--------|--------|--------|--------|---|
| 1-2.c23358/1/1262  | cordon-bleu WH2 repeat prot     | 148230755 | NP_00107964 | 22.68  | 18.04  | 6.59   | 0      | 8      | 12.06  | 0.13   | 0.71   | 0      | 0      | 0      | 0      | 0 |
| 2-3.c53737/1/2587  | PREDICTED: protein FAM2         | 847109632 | XP_0128144C | 2.02   | 0      | 2.97   | 1.89   | 3.89   | 0.38   | 0      | 0.75   | 0      | 0      | 0      | 0      | 0 |
| 1-2.c16419/12/1901 | PREDICTED: solute carrier f     | 823467263 | XP_01242793 | 44.77  | 57.39  | 77.72  | 34.94  | 54.22  | 139.83 | 45.54  | 44.61  | 54.93  | 5.21   | 2.35   | 3.77   |   |
| 2-3.c54865/2/2324  | PREDICTED: glycogen debr        | 847125952 | XP_01281792 | 47.94  | 4.42   | 61.88  | 95.49  | 74.36  | 22.23  | 35.74  | 50.65  | 89.66  | 3.4    | 2.94   | 8.91   |   |
| 1-2.c10716/6/1445  | --                              | --        | --          | 25.34  | 0.48   | 21.16  | 44.2   | 22.46  | 13.33  | 25.08  | 26.96  | 0      | 0      | 0      | 4.85   |   |
| 3-6.c2694/10/3348  | AP-1 complex subunit beta-1     | 189230240 | NP_00112144 | 0.05   | 0.13   | 1.19   | 0      | 2.35   | 2.48   | 1.75   | 0      | 0      | 0      | 0      | 0      |   |
| 1-2.c27498/1/1550  | protein kinase C substrate 801  | 147900167 | NP_00108712 | 0      | 0      | 0.31   | 0      | 0      | 0      | 7.74   | 0      | 0.89   | 4.82   | 3.94   | 2.94   |   |
| 2-3.c30396/1/2157  | phytanoyl-CoA hydroxylase-      | 118403656 | NP_00107232 | 1.58   | 1.21   | 0.23   | 1.16   | 0.45   | 0.93   | 0.95   | 0.16   | 2.36   | 17.74  | 11.3   | 34.67  |   |
| 1-2.c30483/1/7284  | PREDICTED: beclin 1-assoc       | 512862076 | XP_00293377 | 20.97  | 2.4    | 0.45   | 6.19   | 7.46   | 0      | 0      | 0      | 0      | 0      | 0      | 0      |   |
| 1-2.c25880/1/1518  | PREDICTED: rho GTPase-ac        | 527274234 | XP_00515487 | 0      | 0      | 0      | 0.35   | 3.42   | 2.34   | 0      | 0      | 2.81   | 0      | 0      | 0      |   |
| 1-2.c30367/2/1758  | PREDICTED: RNA-binding          | 847135541 | XP_01282024 | 0      | 24.17  | 0      | 0      | 0      | 0      | 0      | 0      | 0      | 14.28  | 20.74  | 0      |   |
| 2-3.c37792/1/2598  | PREDICTED: myosin-4 [Xer        | 847156920 | XP_01282446 | 16.79  | 0      | 47.23  | 19.92  | 54.86  | 0      | 25.03  | 61.16  | 25.08  | 0      | 0      | 0      |   |
| 2-3.c29193/1/2252  | PREDICTED: probable ATP.        | 348511436 | XP_00344325 | 14.28  | 35.83  | 14.69  | 11.41  | 9.48   | 11.92  | 6.93   | 10.91  | 2.82   | 1.84   | 0      | 2.15   |   |
| 1-2.c36045/1/5902  | PDZ and LIM domain 7 (enig      | 148223185 | NP_00108073 | 227.38 | 119.99 | 617.92 | 322.27 | 462.86 | 403.83 | 417.77 | 412.17 | 277.16 | 48.38  | 27.89  | 112.77 |   |
| 1-2.c15798/1/1397  | WD repeat domain 13 [Xenoj      | 56118773  | NP_00100805 | 0      | 0      | 0      | 0      | 0      | 0      | 0      | 0      | 3.17   | 7.5    | 16.53  | 2.24   |   |
| 2-3.c29386/1/2237  | forkhead box protein J2 [Xen    | 349501020 | NP_00100567 | 0      | 0      | 0      | 0      | 0      | 0      | 0      | 0      | 0      | 0.63   | 3.54   | 3.49   |   |
| 1-2.c32762/1/1251  | PREDICTED: cyclin-L1 isofi      | 594620350 | XP_00716485 | 21.72  | 31.83  | 11.7   | 2.78   | 0      | 5.74   | 15.01  | 15.99  | 19.17  | 53.62  | 83.29  | 54.44  |   |
| 3-6.c15536/2/2623  | proteasome activator comple     | 156717318 | NP_0010962C | 2.77   | 19.55  | 2.46   | 1.42   | 6.47   | 11.18  | 0      | 0      | 3.88   | 0      | 0      | 0.45   |   |
| 2-3.c4500/1/2542   | PREDICTED: nascent polype       | 847099444 | XP_01281224 | 27.16  | 34.42  | 24.77  | 19     | 13.45  | 32.74  | 17.12  | 12.84  | 15.97  | 3.32   | 4.14   | 2.63   |   |
| 3-6.c14405/1/3674  | PREDICTED: SAFB-like tra        | 847162187 | XP_01282542 | 0      | 0      | 1.03   | 2.59   | 2.03   | 0      | 0      | 0      | 0      | 0      | 0      | 0      |   |
| 1-2.c26614/1/1956  | aspartyl/asparaginyl beta-hyd   | 62751990  | NP_00101573 | 8.33   | 3.66   | 12.18  | 9.85   | 10.89  | 20.12  | 9.6    | 10.4   | 8.47   | 0.85   | 0.85   | 2.89   |   |
| 3-6.c18230/1/2839  | GMP reductase 1 [Xenopus (      | 166158200 | NP_00110725 | 53.17  | 4.49   | 39.24  | 37.98  | 42.13  | 39.27  | 23.12  | 39.18  | 49.98  | 3.74   | 3.58   | 10.83  |   |
| 2-3.c20605/1/2198  | tripeptidyl-peptidase 1 precu   | 156717508 | NP_00109625 | 0      | 0      | 0      | 11.11  | 15.96  | 0      | 0      | 3.65   | 0.54   | 0      | 0      | 0      |   |
| 3-6.c18532/1/2701  | --                              | --        | --          | 0      | 0      | 0      | 0      | 0      | 0      | 5.23   | 0      | 0      | 2.93   | 1.43   | 1.62   |   |
| 2-3.c53457/1/2303  | PREDICTED: DNA damage-          | 512818445 | XP_0049115C | 2.68   | 0.47   | 0.73   | 1.52   | 3.08   | 2      | 0.25   | 0.94   | 5.09   | 0      | 0.2    | 0      |   |
| 3-6.c5038/1/2692   | RecName: Full=Sarcoplasmic      | 9789732   | Q92105.1    | 6.36   | 0      | 4.81   | 6.98   | 7.33   | 3.85   | 5.35   | 5.64   | 5.22   | 0.33   | 1.74   | 0.35   |   |
| 1-2.c19417/1/1944  | --                              | --        | --          | 1.58   | 2.08   | 2.18   | 4.31   | 4.11   | 3.07   | 2.2    | 0      | 1.39   | 0      | 0      | 0      |   |
| 2-3.c54769/1/2329  | mitochondrial ribosomal prot    | 148224662 | NP_00108778 | 4.63   | 7.42   | 4.14   | 4.44   | 3.87   | 7.35   | 1.77   | 3.1    | 3.1    | 0.79   | 0.31   | 0.43   |   |
| 1-2.c45721/1/1836  | PREDICTED: glycerophosph        | 847157563 | XP_01282457 | 0      | 1.45   | 0.55   | 0.43   | 0.83   | 0.76   | 7.28   | 0      | 0.51   | 25.88  | 29.63  | 64.78  |   |
| 1-2.c33864/3/1887  | --                              | --        | --          | 4.56   | 0.88   | 8.17   | 4.52   | 9.79   | 5.87   | 2.81   | 1.09   | 1.15   | 0      | 0      | 0      |   |
| 1-2.c12985/2/1537  | eukaryotic translation initiati | 148238002 | NP_00108714 | 8.19   | 0      | 6.99   | 4.95   | 3.07   | 6.1    | 1.72   | 4.25   | 4.83   | 0      | 0.97   | 0      |   |
| 1-2.c39589/1/1277  | PREDICTED: histone acetyl       | 637375986 | XP_00812292 | 0.93   | 2.16   | 0      | 0      | 0      | 0.93   | 1.47   | 0.67   | 6.87   | 11.57  | 1.25   |        |   |
| 2-3.c48377/1/1944  | --                              | --        | --          | 8.14   | 14.03  | 1.31   | 7.18   | 9.6    | 5.6    | 23.55  | 21.61  | 9.55   | 165.78 | 227.95 | 133.71 |   |
| 1-2.c29826/1/1484  | PREDICTED: inhibitor of gr      | 847109424 | XP_01281433 | 0      | 0      | 0.36   | 0      | 0      | 0      | 3.65   | 0.38   | 2.15   | 8.15   | 9.92   | 7.23   |   |
| 2-3.c53140/1/2342  | [Drosophila virilis]:           | 195386312 | XP_00205184 | 7.81   | 158.55 | 45.39  | 19.01  | 8.43   | 21.49  | 13.84  | 10.34  | 22.46  | 0.3    | 0      | 1.55   |   |
| 3-6.c2706/7/2943   | PREDICTED: transmembran         | 847171915 | XP_01280927 | 0.87   | 0      | 0.83   | 0.53   | 2.89   | 1.04   | 0      | 0.74   | 0      | 0      | 0      | 0      |   |
| 3-6.c14449/1/2897  | epithelial splicing regulatory  | 52346028  | NP_00100505 | 0      | 3.57   | 6.74   | 1.86   | 0.3    | 0.88   | 0      | 0      | 0      | 0      | 0      | 0      |   |
| 1-2.c43902/1/1928  | --                              | --        | --          | 193.65 | 19.3   | 202.95 | 419.31 | 193.73 | 121.06 | 90.84  | 171.92 | 421.46 | 9.94   | 0      | 25.86  |   |
| 1-2.c20689/1/1547  | --                              | --        | --          | 26.82  | 14.46  | 24.32  | 27.37  | 28.28  | 37.8   | 34.48  | 42.04  | 64.9   | 2.2    | 11.03  | 2.37   |   |
| 1-2.c46057/1/1319  | --                              | --        | --          | 0      | 0      | 0      | 0      | 0      | 0      | 0      | 0      | 0      | 7.95   | 34.58  | 8.4    |   |
| 2-3.c17567/1/2301  | --                              | --        | --          | 4.98   | 3.02   | 0.27   | 0      | 0.06   | 0      | 0      | 0.32   | 0      | 6.78   | 3.11   | 6.91   |   |
| 2-3.c40477/1/2179  | PREDICTED: zinc transporte      | 301618652 | XP_00293871 | 5.32   | 27.8   | 0.3    | 0      | 0      | 0      | 4.77   | 0      | 0      | 13.73  | 9.33   | 0      |   |
| 2-3.c46491/1/2259  | PREDICTED: phosphorylase        | 847153425 | XP_01282352 | 3.06   | 0.99   | 4.96   | 6.78   | 5.45   | 5.58   | 6.61   | 2.96   | 8.63   | 0.47   | 0.38   | 1.01   |   |
| 2-3.c49279/2/2197  | PREDICTED: tubulin beta-4l      | 557016409 | XP_00600863 | 0      | 0      | 0      | 0      | 0      | 0      | 0      | 0      | 0.38   | 11.26  | 8.21   | 0      |   |
| 2-3.c15731/1/3610  | calsequestrin 1 (fast-twitch, s | 148231736 | NP_00108022 | 125.87 | 0      | 831.98 | 428.62 | 605.93 | 159.35 | 340.93 | 691.79 | 386.82 | 0      | 0      | 104.93 |   |
| 2-3.c28969/1/1968  | PREDICTED: complement fi        | 847125968 | XP_01281793 | 2.38   | 3.22   | 5.17   | 3.71   | 6.91   | 1.55   | 1.07   | 1.76   | 1.54   | 0.18   | 0      | 0      |   |
| 1-2.c30926/2/1310  | --                              | --        | --          | 4.9    | 0      | 8.55   | 2.85   | 4.18   | 1.48   | 2.6    | 4.49   | 5.62   | 0      | 0.13   | 0      |   |
| 1-2.c8309/1/1455   | --                              | --        | --          | 4.16   | 10.09  | 3.25   | 2.88   | 2.09   | 5.75   | 2.97   | 2.35   | 3.39   | 90.47  | 70.97  | 68.17  |   |
| 2-3.c27682/1/2331  | --                              | --        | --          | 3.84   | 0.37   | 4.13   | 4.39   | 4.81   | 1.41   | 1.73   | 4.22   | 1.36   | 0.91   | 0      | 0      |   |
| 2-3.c62973/3/2121  | endothelin converting enzym     | 132424622 | ABO33468.1  | 0      | 0      | 0      | 0      | 0      | 0      | 0      | 0      | 0      | 0.72   | 3.94   | 3.07   |   |
| 3-6.c3588/5/3338   | transducin beta-like protein 3  | 62859901  | NP_00101731 | 3.12   | 10.94  | 2.61   | 3      | 2.61   | 7.57   | 2.66   | 2.03   | 2.06   | 0.22   | 0.46   | 0.71   |   |
| 1-2.c17425/1/1487  | fibroblast growth factor 6 pre  | 218664453 | NP_00113625 | 1.36   | 4.07   | 3.19   | 2.07   | 2.87   | 3.24   | 1.26   | 1.38   | 2.32   | 0      | 0      | 0.1    |   |
| 3-6.c7657/2/3333   | PREDICTED: alpha-protein l      | 512852902 | XP_00491603 | 79.58  | 8.16   | 33.36  | 41.94  | 71.79  | 15.71  | 34.52  | 33.42  | 37.89  | 1.92   | 1.56   | 3.59   |   |
| 1-2.c11616/1/1684  | --                              | --        | --          | 0.94   | 0      | 0      | 0      | 0      | 0      | 2.35   | 0.76   | 0      | 0.38   | 5.79   | 4.98   |   |
| 2-3.c12718/1/1902  | --                              | --        | --          | 9.86   | 11.13  | 9.08   | 11.11  | 6.59   | 10.68  | 33.91  | 8.65   | 7.18   | 180.79 | 202.16 | 182.85 |   |
| 1-2.c18626/1/1432  | PREDICTED: l-acyl-sn-glyc       | 847152645 | XP_01282327 | 1.5    | 1.82   | 0      | 0      | 0      | 1.78   | 5.78   | 3.09   | 0      | 19.32  | 19.4   | 15.1   |   |
| 1-2.c35069/1/1529  | PREDICTED: kelch-like prot      | 149408781 | XP_00150787 | 34.83  | 6.81   | 3.1    | 5      | 3.29   | 1.42   | 14.05  | 23.65  | 18.89  | 86.07  | 118.39 | 86.9   |   |
| 1-2.c19181/2/1350  | --                              | --        | --          | 0      | 4.03   | 0      | 0      | 3.06   | 0      | 14.08  | 3.25   | 4.07   | 23.89  | 41.56  | 25.83  |   |

|                    |                                 |           |             |         |        |         |         |         |         |         |         |         |        |        |        |
|--------------------|---------------------------------|-----------|-------------|---------|--------|---------|---------|---------|---------|---------|---------|---------|--------|--------|--------|
| 3-6.c18031/1/3199  | Mgc53960 protein [Xenopus       | 115528672 | AAI24909.1  | 2.08    | 0.81   | 2.08    | 3.41    | 3.73    | 2.11    | 1.9     | 2.2     | 1.82    | 0.23   | 0.26   | 0.38   |
| 1-2.e29028/2/1830  | Map2k3 protein [Xenopus lac     | 50604142  | AAH77760.1  | 8.09    | 1.15   | 18.04   | 9.24    | 11.87   | 10.5    | 8.63    | 8.66    | 10.39   | 1.79   | 0.33   | 1.54   |
| 2-3.c12176/1/5964. | PREDICTED: phosphoglycer        | 432887047 | XP_00407490 | 325.14  | 18.86  | 307.89  | 600.51  | 316.38  | 195.08  | 225.36  | 334.41  | 402.89  | 43.6   | 11     | 50.74  |
| 2-3.c7378/1/2151   | PREDICTED: protein phosph       | 823396584 | XP_01241593 | 0       | 1.53   | 1.39    | 1.1     | 1.04    | 2.17    | 0       | 0       | 0       | 0      | 0      | 0      |
| 1-2.e40637/1/1345  | --                              | --        | --          | 0       | 0      | 0       | 0       | 0       | 0       | 0       | 0       | 0       | 8.45   | 21.11  | 2.99   |
| 2-3.e21223/7/2347  | PREDICTED: probable 28S r       | 301624894 | XP_00294172 | 32.36   | 54.69  | 16.12   | 17.89   | 15.21   | 24.55   | 18.16   | 15.98   | 17.56   | 3.04   | 0.96   | 4.3    |
| 2-3.c60943/1/2539  | eukaryotic translation initiat  | 52346034  | NP_00100506 | 9.75    | 23.57  | 14.2    | 16.97   | 12.81   | 14.65   | 7.44    | 12.27   | 7.18    | 2.71   | 0.45   | 3.16   |
| 2-3.e5330/1/2190.1 | --                              | --        | --          | 0       | 0      | 2.54    | 8.47    | 0       | 0       | 3.35    | 0.84    | 0.55    | 103.43 | 239.11 | 83.23  |
| 2-3.c26256/4/2183  | Myozenin-1-like [Xenopus la     | 148237556 | NP_00107945 | 7.7     | 1.53   | 13.46   | 12.06   | 12.03   | 12.67   | 16.85   | 10.36   | 23.47   | 2.17   | 1.13   | 1.82   |
| 1-2.e29621/1/1669  | PREDICTED: phosphoribosyl       | 847162833 | XP_01282564 | 16.25   | 37.99  | 5.22    | 11.5    | 4.71    | 8.33    | 19.63   | 10.32   | 19.45   | 96.3   | 198.77 | 195.3  |
| 1-2.e44684/1/1472  | granulins precursor [Xenopus    | 118403712 | NP_00107216 | 44.61   | 21.24  | 6.67    | 3.18    | 0.19    | 2.88    | 5.32    | 0       | 6.64    | 0      | 0      | 0      |
| 2-3.c33274/1/2381. | PREDICTED: actin, alpha ca      | 637243920 | XP_00321452 | 1127.05 | 164.01 | 3153.35 | 1523.26 | 1183.13 | 1965.29 | 3075.6  | 3931.57 | 1521.52 | 266.72 | 229.42 | 310.03 |
| 1-2.c38912/1/1602  | --                              | --        | --          | 0.42    | 0.01   | 0       | 0       | 0       | 0       | 0       | 0.45    | 1.01    | 7.61   | 6.61   | 0.38   |
| 2-3.e8559/1/2485.1 | --                              | --        | --          | 2.22    | 2.47   | 1.35    | 2.11    | 2.77    | 2.8     | 0       | 2.74    | 3.39    | 112.45 | 59.17  | 46.19  |
| 1-2.e4368/1/1798   | PREDICTED: calcium-bindin       | 847163610 | XP_01282585 | 0       | 0      | 0       | 0       | 0       | 0       | 3.21    | 0       | 0       | 2.95   | 4.08   | 2.49   |
| 3-6.c8064/2/3110   | breast cancer anti-estrogen re  | 147906605 | NP_00108515 | 0.63    | 1.5    | 0.91    | 2.22    | 1.64    | 0.53    | 0.37    | 1.32    | 1.58    | 0.18   | 0      | 0      |
| 1-2.e14112/3/1436  | PREDICTED: adenylate kina       | 530600033 | XP_00529350 | 1979.78 | 278.16 | 2899.27 | 3501.76 | 2864.31 | 1541.4  | 2529.65 | 2893.89 | 2570.23 | 457.74 | 435.15 | 559.41 |
| 1-2.e17517/2/1393  | PREDICTED: pescadillo hon       | 847086285 | XP_01281415 | 21.45   | 37.94  | 8.17    | 14.66   | 5.07    | 17.65   | 13.79   | 14.09   | 12.81   | 2.63   | 0.46   | 1.13   |
| 2-3.c1437/48/2329  | PREDICTED: propionyl-CoA        | 301615335 | XP_00293713 | 8.28    | 18.52  | 7.19    | 6.35    | 8.28    | 21.45   | 7.32    | 4.29    | 5.36    | 1.16   | 2.18   | 0      |
| 1-2.e24414/5/1753  | reticulum-3-A [Xenopus laevi    | 148236603 | NP_00108571 | 2.31    | 2.71   | 1.08    | 1.12    | 2.55    | 1       | 0       | 0       | 0       | 0      | 0      | 0      |
| 1-2.e4491/8/1453   | PREDICTED: glycogen phos        | 556954754 | XP_00598898 | 119.88  | 4.22   | 110.24  | 179.46  | 182.89  | 94.6    | 127.01  | 237.6   | 160.21  | 33.08  | 27.56  | 23.08  |
| 2-3.e9571/1/2047   | --                              | --        | --          | 3.59    | 0.82   | 5.62    | 6.35    | 4.38    | 8.38    | 0.65    | 1.1     | 0.87    | 1.41   | 0.36   | 0.3    |
| 1-2.e32648/1/1689  | --                              | --        | --          | 4.68    | 0      | 0       | 0       | 0       | 0       | 0       | 0       | 5.1     | 3.52   | 2.55   | 3.98   |
| 2-3.e41107/1/2432  | hydroxyacyl-CoA dehydroge       | 148238090 | NP_00108561 | 0       | 0.54   | 0       | 0       | 0       | 0       | 0.37    | 0       | 0.65    | 0      | 5.65   | 6.67   |
| 1-2.e41847/2/1471  | PREDICTED: catenin beta-1-      | 556987425 | XP_00599905 | 0       | 0      | 0       | 0       | 0       | 0       | 0       | 0       | 0       | 25.84  | 49.45  | 0      |
| 2-3.e21599/1/2146  | --                              | --        | --          | 4.81    | 0.47   | 0.84    | 3.02    | 3.24    | 0       | 1.42    | 2.68    | 4.51    | 0      | 0      | 0      |
| 1-2.e7783/1/1587   | Mapre1-prov protein [Xenop      | 27924168  | AAH44954.1  | 0       | 0      | 0       | 0       | 0       | 0       | 0.77    | 0       | 5.54    | 11.25  | 13.49  | 0      |
| 1-2.e49951/1/1668  | ZPR1 zinc finger [Xenopus la    | 189217508 | NP_00112122 | 3.74    | 0      | 0       | 0       | 0       | 0       | 8.95    | 0       | 0       | 0      | 11.04  | 9.99   |
| 2-3.e49174/1/2348  | --                              | --        | --          | 60.11   | 17.31  | 47.14   | 29.2    | 36.37   | 6.78    | 16.07   | 69.78   | 35.85   | 1.72   | 0.57   | 1.87   |
| 2-3.e53219/1/2491  | --                              | --        | --          | 0       | 1.42   | 1.06    | 0       | 0       | 0.5     | 1.6     | 0       | 7.06    | 6.37   | 6.54   | 0      |
| 3-6.e2861/5/3389   | apelin preproprotein [Xenopu    | 284413797 | NP_00116514 | 0.79    | 2.33   | 0.38    | 0.31    | 0.87    | 1.11    | 0.11    | 0       | 0.49    | 0      | 0      | 0      |
| 3-6.e3252/3/3154   | lysyl oxidase homolog 2 prec    | 213982721 | NP_00113552 | 3.42    | 28.3   | 14.32   | 10.11   | 15.24   | 24.49   | 5.92    | 5.49    | 5.29    | 1.71   | 0.17   | 5.2    |
| 2-3.e53842/1/2100  | tripeptidyl-peptidase 1 precu   | 156717508 | NP_00109625 | 0       | 1.04   | 3.38    | 5.14    | 3.68    | 0       | 3.92    | 0.23    | 7.26    | 0      | 0      | 0      |
| 1-2.e40635/1/8999  | PREDICTED: nuclease-sensi       | 594676952 | XP_00718627 | 0       | 0      | 0       | 0       | 0       | 0       | 0       | 0       | 0       | 0      | 28.68  | 26.3   |
| 1-2.e45931/1/1365  | PREDICTED: hydroxysteroid       | 847099649 | XP_01281231 | 0.58    | 1.93   | 0.26    | 0       | 0.84    | 1.75    | 7.77    | 0.31    | 0       | 13.47  | 20.81  | 42.27  |
| 1-2.e9600/9/1592   | PREDICTED: ras-related pro      | 573880320 | XP_00662836 | 0       | 0      | 3.22    | 0.81    | 8.06    | 3.7     | 0       | 0       | 0       | 0      | 0      | 0      |
| 2-3.e15125/1/2502  | --                              | --        | --          | 0.42    | 0      | 0.45    | 0.63    | 1.01    | 0       | 3.07    | 1.32    | 1.94    | 11.43  | 9.48   | 23.9   |
| 2-3.e21894/1/6385. | --                              | --        | --          | 9.84    | 5.02   | 0.03    | 0       | 5.98    | 9.29    | 25.77   | 14.95   | 31.14   | 116.51 | 117.3  | 114.87 |
| 2-3.e5585/1/2068   | PREDICTED: circadian-asso       | 512875732 | XP_00491897 | 0       | 1.47   | 0.1     | 0       | 0       | 0       | 0       | 0       | 0       | 3.17   | 5.87   | 0.74   |
| 1-2.e22950/1/1271  | eukaryotic translation initiat  | 113931184 | NP_00103903 | 1.57    | 0      | 0       | 0       | 0       | 0       | 0.88    | 0.43    | 0.55    | 4.72   | 8.03   | 2.37   |
| 1-2.e27975/1/1490  | --                              | --        | --          | 3.07    | 6.35   | 0.21    | 0       | 0       | 0       | 3.6     | 2.99    | 0       | 8.18   | 5.29   | 1.17   |
| 1-2.e26081/1/1305  | secreted frizzled-related prote | 148226186 | NP_00108066 | 0       | 42.72  | 0       | 0       | 0       | 0       | 0       | 0       | 2.21    | 2.12   | 3.79   | 11.62  |
| 1-2.e33269/1/1310. | --                              | --        | --          | 42.79   | 31.86  | 4.57    | 4.84    | 10.5    | 10.91   | 38.14   | 28.89   | 9.15    | 212.83 | 261.57 | 140.84 |
| 1-2.e35234/1/1459  | granulins precursor [Xenopus    | 118403712 | NP_00107216 | 0       | 0      | 1.27    | 0       | 0       | 0       | 1.83    | 0       | 2.46    | 44.68  | 103.4  | 0      |
| 2-3.e13370/1/1964. | --                              | --        | --          | 11.87   | 7.7    | 6.2     | 9.84    | 7.47    | 5.87    | 14.5    | 8.68    | 9.99    | 102.37 | 148.18 | 212.4  |
| 2-3.e44940/3/2359  | PREDICTED: glycogen debr        | 847125952 | XP_01281792 | 0.62    | 0      | 11.02   | 11.14   | 11.23   | 2.83    | 17.41   | 6.1     | 9.51    | 0.29   | 0.29   | 1.75   |
| 2-3.e32130/1/2463  | cysteine-tRNA ligase, cytopl    | 58332582  | NP_00101136 | 0       | 3.91   | 0       | 0       | 0       | 0       | 0       | 0       | 0       | 2.51   | 2.58   | 1.29   |
| 1-2.e24296/1/1760  | splicing factor proline/glutam  | 189230206 | NP_00112142 | 8.82    | 0.71   | 19.17   | 0       | 0       | 0       | 19.6    | 2.27    | 0       | 9.54   | 9.01   | 0      |
| 1-2.e28231/1/1565. | --                              | --        | --          | 3.81    | 4.55   | 3.02    | 3.95    | 2.03    | 4.71    | 9.58    | 6.29    | 6.68    | 52.24  | 151.8  | 87.86  |
| 2-3.e22840/1/2323  | uncharacterized protein LOC     | 147901083 | NP_00108450 | 0       | 0      | 0       | 0       | 0       | 0       | 0.11    | 0       | 0       | 2.25   | 3.98   | 1.32   |
| 2-3.e27284/2/1994  | --                              | --        | --          | 6.07    | 35.29  | 0.03    | 0       | 0.04    | 0       | 0.09    | 0.08    | 0       | 23.99  | 0      | 16.85  |
| 3-6.e15308/1/4354  | collagen, type 1, alpha 2 prec  | 147898763 | NP_00108072 | 21.17   | 1033.2 | 180.18  | 99.87   | 36.15   | 0       | 55.88   | 68.88   | 83.48   | 0.06   | 0      | 0      |
| 2-3.e20686/5/2784. | --                              | --        | --          | 47.68   | 54.73  | 0.26    | 0.16    | 0.32    | 0       | 111.59  | 0.38    | 0.41    | 5.74   | 270.66 | 157.03 |
| 1-2.e51503/3/1275  | uncharacterized protein LOC     | 147903581 | NP_00108456 | 31.19   | 8.76   | 13.36   | 16.19   | 16.1    | 18.72   | 8.28    | 20.15   | 14.74   | 0.59   | 0      | 5.18   |
| 1-2.e41378/1/1425  | --                              | --        | --          | 0       | 0      | 1.24    | 0.29    | 0       | 1.18    | 8.65    | 0       | 1.44    | 158.58 | 207.35 | 8.11   |
| 2-3.e14966/2/2019  | calcium/calmodulin-dependen     | 166795935 | NP_00110772 | 0.59    | 0      | 0       | 1.92    | 1.91    | 2.06    | 0       | 0       | 3.65    | 0.15   | 0      | 0      |
| 2-3.e2960/13/2370  | cadherin-13 precursor [Xenop    | 156718012 | NP_00109654 | 3.32    | 7.98   | 5.92    | 5.01    | 8.02    | 9.18    | 4.98    | 5.31    | 5.78    | 0.88   | 0.29   | 1.49   |
| 1-2.e8709/2/1204   | uncharacterized protein LOC     | 351542224 | NP_00112015 | 4.26    | 7.26   | 4.2     | 6.24    | 4.46    | 5.64    | 26.68   | 5.13    | 4.77    | 106.01 | 122.31 | 109.39 |



|                    |                                  |           |             |        |         |        |        |        |        |        |        |        |        |        |        |
|--------------------|----------------------------------|-----------|-------------|--------|---------|--------|--------|--------|--------|--------|--------|--------|--------|--------|--------|
| 1-2.c25727/1/1406  | --                               | --        | 6.47        | 10.75  | 4.53    | 4.82   | 1.16   | 4.3    | 5.93   | 4.69   | 5.48   | 89.31  | 74.6   | 55.45  |        |
| 3-6.e9799/1/2553   | PREDICTED: host cell factor      | 543381231 | XP_00553380 | 0.19   | 1.53    | 0.32   | 0.62   | 0.19   | 0      | 1.77   | 0      | 0      | 5.77   | 7.68   | 13.08  |
| 3-6.e15325/1/3418  | cGMP-dependent 3',5'-cyclic      | 118404742 | NP_00107260 | 25.8   | 28.29   | 11.55  | 10.77  | 8.67   | 18.58  | 2.48   | 2.66   | 11.32  | 3.44   | 1.42   | 1.19   |
| 2-3.c13458/1/6442  | PREDICTED: dihydrolipoyl         | 512830506 | XP_00293316 | 115.64 | 52.34   | 78.94  | 95.88  | 96.75  | 78.54  | 41.91  | 55.31  | 69.88  | 10.45  | 14.46  | 17.19  |
| 1-2.e18682/1/1404  | glycine--rRNA ligase [Xenop      | 55926180  | NP_00100745 | 11.03  | 19.47   | 4.39   | 0      | 0.05   | 1.39   | 11.19  | 3.72   | 2.88   | 15.86  | 24.17  | 7.47   |
| 3-6.e14381/1/3475  | PREDICTED: collagen alpha        | 591360730 | XP_00705528 | 0      | 17.07   | 0.5    | 4.05   | 0      | 8.84   | 0      | 3.03   | 0      | 0      | 0      | 0      |
| 1-2.e15706/1/1237  | predicted protein [Nematostel    | 156405864 | XP_00164095 | 5.48   | 0.28    | 0.64   | 1.19   | 2.84   | 0.46   | 2.09   | 3.99   | 0.93   | 53.35  | 29.42  | 34.44  |
| 3-6.e10742/1/3522  | --                               | --        | 2.32        | 3.8    | 2.77    | 5.79   | 5.66   | 7.19   | 13.77  | 3.73   | 5.76   | 104.91 | 189.83 | 97.45  |        |
| 1-2.c30027/1/1481  | PREDICTED: gastric intrinsi      | 637248235 | XP_00810885 | 0.55   | 0.25    | 0      | 0.72   | 4.37   | 9.17   | 13.11  | 4.56   | 4.31   | 74.88  | 67.09  | 188.56 |
| 2-3.c28174/1/2164  | PREDICTED: DCN1-like prc         | 564336204 | XP_00623232 | 6.29   | 3.61    | 3.47   | 3.68   | 4.58   | 8.54   | 4.37   | 2.39   | 2.24   | 0.67   | 0      | 0.91   |
| 3-6.e13464/1/2771  | importin-9 [Xenopus (Siluran     | 148235030 | NP_00109064 | 2.63   | 4.79    | 2.1    | 2.08   | 3.65   | 1.99   | 0.56   | 2.28   | 1.37   | 0.15   | 0      | 0.37   |
| 1-2.e45199/1/1078  | Transposable element Tc3 tra     | 294896790 | XP_00277572 | 2.65   | 0       | 0      | 0      | 0      | 1.39   | 0      | 2.93   | 15.83  | 0      | 14.64  |        |
| 1-2.c51362/2/1231  | PREDICTED: protein PFC07         | 556961274 | XP_00599098 | 8.95   | 4.38    | 12.87  | 14.05  | 24.8   | 62.96  | 20.56  | 7.89   | 21.57  | 3.74   | 0.34   | 0.58   |
| 2-3.c34296/1/2538  | PREDICTED: collagen alpha        | 847166756 | XP_01282667 | 9.71   | 87.71   | 16.29  | 9.24   | 14.86  | 51.49  | 3.65   | 8.72   | 7.76   | 0.04   | 0.14   | 0.55   |
| 1-2.e14503/1/1299  | --                               | --        | 0           | 0      | 0       | 0      | 0      | 3.88   | 0.3    | 0      | 0      | 66.1   | 32.25  | 31.01  |        |
| 2-3.c30736/5/2679  | PREDICTED: histone-argini        | 301627458 | XP_00294288 | 0.37   | 2.19    | 0      | 1.93   | 1.08   | 0.3    | 0.52   | 0.96   | 0.34   | 0      | 0      | 0.04   |
| 2-3.c62299/1/2324  | MGC84250 protein [Xenopus        | 148225296 | NP_00108790 | 107.86 | 8.06    | 121.95 | 224.28 | 120.82 | 75.22  | 96.43  | 116.85 | 176.65 | 19.47  | 5.05   | 24.91  |
| 1-2.e48740/1/1509  | NIMA-related kinase 6 [Xenc      | 148228408 | NP_00108065 | 2.72   | 2.81    | 7.57   | 5.82   | 8.88   | 1.73   | 4.46   | 2.65   | 3.74   | 0      | 1.07   | 0      |
| 1-2.e28764/1/6859  | PREDICTED: cold-inducible        | 837829631 | XP_00459565 | 699.82 | 1169.03 | 495.97 | 248.1  | 513.72 | 467.84 | 78.49  | 257.29 | 135.83 | 0      | 0      | 191.98 |
| 3-6.e16522/1/3292  | PREDICTED: fat storage-ind       | 847092180 | XP_00491081 | 0.52   | 0.97    | 1.6    | 2.38   | 1.75   | 3.03   | 1.65   | 1.2    | 1.63   | 0.25   | 0.08   | 0.23   |
| 2-3.e19435/1/2623  | RNA-binding protein 24-A [J      | 147907395 | NP_00108095 | 3.16   | 1.8     | 5.67   | 4      | 4.51   | 11.18  | 0      | 4.29   | 5.04   | 1.49   | 0      | 0.84   |
| 1-2.c21166/1/1351  | uncharacterized protein LOC      | 148227144 | NP_00108893 | 0      | 0       | 0      | 0      | 0      | 0      | 0      | 0      | 0      | 17.11  | 25.94  | 0      |
| 2-3.e61614/1/2077  | --                               | --        | 0           | 0      | 0.17    | 2.98   | 3.88   | 0      | 0      | 0      | 0      | 3.5    | 0      | 0      | 0      |
| 1-2.c31224/1/1217  | --                               | --        | 4.14        | 0      | 0       | 0.7    | 0      | 2.03   | 8.03   | 4.97   | 3.08   | 30.83  | 24.37  | 19.07  |        |
| 1-2.c25693/1/1894  | --                               | --        | 19.4        | 19.05  | 4.29    | 6.81   | 5.5    | 7.18   | 31.92  | 7.09   | 5.91   | 119.89 | 173.02 | 92.51  |        |
| 1-2.e30602/1/1614  | --                               | --        | 0           | 0      | 0       | 0.85   | 0      | 0      | 0      | 0      | 0      | 10.66  | 15.55  | 10.93  |        |
| 1-2.e45922/1/1643  | alpha1 type II collagen [Cync    | 5360532   | BAA82043.1  | 0      | 12.22   | 0      | 0      | 0      | 0      | 2.51   | 0.62   | 3.84   | 3.2    | 2.84   |        |
| 1-2.e45083/1/1247  | --                               | --        | 8.59        | 56.39  | 8.06    | 10.05  | 7.18   | 17.71  | 2.75   | 5.42   | 16.16  | 2.75   | 0.75   | 0.36   |        |
| 2-3.e33444/1/2308  | PREDICTED: ubiquitin-asso        | 847089063 | XP_01282186 | 0      | 0       | 0      | 0      | 0      | 0      | 0      | 0      | 6.86   | 6.11   | 0      |        |
| 2-3.e11939/1/2565  | PREDICTED: 28S ribosomal         | 847132351 | XP_01281932 | 11.2   | 10.1    | 5.2    | 9.4    | 4.81   | 8.87   | 2.38   | 4.37   | 3.76   | 0.25   | 0      | 1.31   |
| 3-6.e3603/3/2868.1 | PREDICTED: serine/threonin       | 655880357 | XP_00827205 | 1.4    | 0.7     | 0.7    | 0.57   | 0.38   | 1.54   | 0.47   | 0.25   | 1.34   | 22.11  | 31.59  | 29.41  |
| 1-2.e40546/1/1217  | PolyADP-ribose glycohydrol       | 226371920 | ACOS1585.1  | 0      | 0       | 0.16   | 1.13   | 0      | 0      | 4.37   | 2.05   | 1.24   | 21.99  | 11.3   | 11.8   |
| 2-3.e23181/1/2198  | glycosylphosphatidylinositol     | 62752867  | NP_00101580 | 0      | 0       | 0      | 0      | 0      | 0.22   | 0      | 0      | 6.81   | 6.54   | 0      |        |
| 2-3.e26656/1/2017  | PREDICTED: cofilin-2 isof        | 558137250 | XP_00611773 | 217.8  | 173.06  | 311.89 | 169.4  | 221.85 | 535.97 | 281.28 | 248.99 | 249.9  | 24.84  | 60.59  | 40.14  |
| 1-2.e6272/8/1727   | inositol hexakisphosphate kin    | 62859747  | NP_00101595 | 2.22   | 12.86   | 2.38   | 0      | 3.58   | 4.61   | 0      | 0      | 0      | 0      | 0      | 0      |
| 1-2.e29927/2/1244  | --                               | --        | 22.37       | 208.1  | 13.32   | 17.89  | 15.99  | 96.82  | 16.54  | 13.32  | 26.77  | 648.62 | 809.75 | 793.46 |        |
| 2-3.e36027/2/2343  | PREDICTED: glypican-4 [Xi        | 301606027 | XP_00293263 | 0      | 4.99    | 0.78   | 1.81   | 1.28   | 0.16   | 0      | 2.24   | 0.98   | 0      | 0      | 0      |
| 1-2.e6866/1/1354   | tripartite motif-containing prc  | 56118797  | NP_00100818 | 102.16 | 77.2    | 131.87 | 79.91  | 87.9   | 122.65 | 81.83  | 115.76 | 96.56  | 15.03  | 26.18  | 13.05  |
| 1-2.e39201/1/1520  | --                               | --        | 2.41        | 3.53   | 1.2     | 2.39   | 1.35   | 3.53   | 1      | 0.77   | 3.34   | 71.06  | 52.19  | 90.6   |        |
| 1-2.e47345/2/1255  | periostin precursor [Xenopus     | 163915007 | NP_00110637 | 17.62  | 52.09   | 32.17  | 27.79  | 27.79  | 30.78  | 24.9   | 16.65  | 29.17  | 7.88   | 1.37   | 4.02   |
| 1-2.e2420/19/1330  | lumican precursor [Xenopus (     | 58332414  | NP_00101100 | 25.75  | 72.98   | 64.88  | 34.57  | 34.78  | 76.07  | 22.59  | 29.22  | 24.06  | 7.18   | 2.63   | 12.66  |
| 2-3.e10654/1/2168  | PREDICTED: UPF0668 prot          | 557321340 | XP_00603378 | 0      | 0       | 0      | 0      | 0      | 0.12   | 0      | 3.23   | 1.29   | 3.12   | 2.98   |        |
| 2-3.e39555/1/1988  | PREDICTED: very-long-chai        | 847170095 | XP_01280858 | 5.96   | 4.63    | 32.26  | 18.54  | 21.85  | 35.5   | 48.67  | 23.08  | 16.67  | 5.69   | 2.58   | 4.05   |
| 2-3.e41520/1/2520  | uncharacterized protein LOC      | 147905311 | NP_00109060 | 0      | 0       | 0      | 0      | 0.21   | 0      | 0      | 0      | 0.27   | 9.57   | 7.01   | 16.08  |
| 2-3.e59496/1/2513  | PREDICTED: MAP/microtub          | 823462103 | XP_01242955 | 0      | 0.65    | 1.39   | 1.01   | 1.39   | 3.14   | 0.53   | 2.54   | 0      | 0      | 0      | 0      |
| 1-2.e8014/1/1956   | periostin precursor [Xenopus     | 163915007 | NP_00110637 | 4.24   | 61.69   | 12.19  | 10.59  | 8.8    | 14.63  | 9.36   | 3.11   | 8.29   | 2.91   | 0      | 1.68   |
| 1-2.e34981/1/1232  | HLA-B associated transcript      | 49522510  | AAH75571.1  | 0      | 1.5     | 0      | 0      | 0.58   | 1.25   | 1.09   | 0      | 1.16   | 20.07  | 21.62  | 15.41  |
| 1-2.e49695/1/1802  | hypothetical protein LOTGIE      | 676426511 | XP_00904464 | 6.88   | 28.25   | 1.46   | 1.91   | 3.19   | 2.31   | 4.33   | 4.01   | 0      | 39.92  | 72.04  | 45.53  |
| 2-3.c7976/22/2622  | --                               | --        | 9.79        | 10.64  | 5.92    | 23.42  | 17.29  | 6.88   | 130.88 | 6.59   | 9.27   | 303.77 | 456.07 | 213.96 |        |
| 2-3.e43136/1/2698  | slc35b2 protein [Xenopus (Si     | 39794512  | AAH64205.1  | 0      | 4.6     | 0      | 7.65   | 0      | 0      | 10.76  | 0      | 9.1    | 59.63  | 58.57  | 55.11  |
| 3-6.e8838/3/2879.1 | --                               | --        | 1.72        | 0      | 0       | 0      | 0      | 0      | 1.12   | 0      | 0      | 4.23   | 4.97   | 7.44   |        |
| 2-3.e60220/1/2537  | --                               | --        | 0.04        | 1.13   | 0.12    | 0      | 0.03   | 0.12   | 0.04   | 0.03   | 0.04   | 3.56   | 3.54   | 6.53   |        |
| 2-3.e42851/1/2381  | uncharacterized protein LOC      | 148234478 | NP_00108457 | 0      | 0       | 0      | 0      | 0      | 0      | 0.95   | 0      | 1.07   | 1.5    | 5.71   | 1.75   |
| 2-3.e43638/1/2572  | transcription factor jun-B [Xe   | 113205822 | NP_00103795 | 0      | 0.78    | 0      | 0      | 0      | 0      | 0      | 0      | 31.45  | 85.91  | 29.96  | 0      |
| 1-2.e9280/1/4430   | desmin [Xenopus laevis]>gil1     | 148224383 | NP_00108017 | 0      | 0       | 0      | 0      | 0      | 0      | 0      | 0      | 0      | 14.36  | 14.12  | 0      |
| 1-2.e6234/8/1765   | translation initiation factor eI | 148231181 | NP_00108641 | 0      | 0       | 0      | 0      | 9.5    | 22.25  | 0      | 0      | 0      | 0      | 0      | 0      |
| 1-2.e47110/1/1568  | eukaryotic translation initiati  | 62859649  | NP_00101672 | 0      | 0       | 0      | 0      | 0      | 0      | 0      | 0      | 0      | 23.02  | 45.73  | 0      |
| 2-3.e53727/2/2028  | transmembrane protein 65 [X      | 187607455 | NP_00112036 | 2.95   | 0       | 1.02   | 1.59   | 5.14   | 3.61   | 1.88   | 1.7    | 3.76   | 0      | 0      | 0.63   |

|                    |                                |           |             |         |         |        |         |        |         |         |        |        |        |        |        |
|--------------------|--------------------------------|-----------|-------------|---------|---------|--------|---------|--------|---------|---------|--------|--------|--------|--------|--------|
| 2-3.c34023/1/2276  | --                             | --        | 1.37        | 1.38    | 0.55    | 1.39   | 0.33    | 0.06   | 7.45    | 0.9     | 1.21   | 21.23  | 14.58  | 19.21  |        |
| 2-3.e14894/1/2269  | --                             | --        | 0.44        | 6.25    | 0       | 0      | 0.67    | 0      | 0       | 0.43    | 0.16   | 22.82  | 34.53  | 19.69  |        |
| 1-2.e20969/1/1629  | polypyrimidine tract-binding   | 118404352 | NP_00107247 | 0       | 0       | 0      | 0       | 0      | 0       | 0       | 0      | 3.82   | 1.76   | 4.21   |        |
| 2-3.c60976/1/2329  | --                             | --        | 0           | 0       | 0       | 0      | 0       | 0      | 0.21    | 0       | 0.88   | 0.75   | 10.89  | 5.57   |        |
| 1-2.e20287/4/1618  | matrix metalloproteinase-9TF   | 147901642 | NP_00109130 | 1.18    | 0       | 0      | 0       | 0      | 2.23    | 0       | 0      | 76.7   | 2.26   | 277.76 |        |
| 1-2.e50854/2/1477  | PREDICTED: intracellular h     | 847086348 | XP_01281437 | 5.78    | 13.69   | 4.72   | 3.14    | 4.84   | 9.04    | 5.06    | 5.77   | 3.82   | 0      | 1.55   | 0      |
| 2-3.c26211/1/2402  | --                             | --        | 9.09        | 8.53    | 2.27    | 4.09   | 3.81    | 1.55   | 19.79   | 12.54   | 7.77   | 59.42  | 85.08  | 83.83  |        |
| 2-3.e10337/1/2481  | --                             | --        | 31.47       | 34.4    | 23.91   | 32.22  | 27.11   | 36.37  | 15.45   | 12.91   | 22.36  | 5.45   | 3.02   | 7.82   |        |
| 2-3.e55297/1/2435  | calcium uniporter protein, mi  | 194332791 | NP_00112365 | 13.06   | 12.8    | 14.75  | 8.78    | 13.7   | 19.17   | 3.54    | 4.89   | 6.75   | 1.25   | 0.74   | 2.57   |
| 2-3.c26740/1/2340  | PREDICTED: LOW QUALI           | 558146048 | XP_00611955 | 0.93    | 0.22    | 5.46   | 2.54    | 4.54   | 1.74    | 0.6     | 2.07   | 0.43   | 0.68   | 0      | 0      |
| 1-2.e24763/4/1663  | PREDICTED: E3 ubiquitin-p      | 847107025 | XP_01281364 | 9.47    | 6.03    | 2.17   | 0       | 1.58   | 4.02    | 7.49    | 7.02   | 13.17  | 53.33  | 31.06  | 36.63  |
| 3-6.e14914/1/2992  | --                             | --        | 3.35        | 7.86    | 3.8     | 1.51   | 1.76    | 2.33   | 0.32    | 2.31    | 3.86   | 0.34   | 0      | 0      | 0      |
| 2-3.c8768/1/2445   | --                             | --        | 2.5         | 2.45    | 0.19    | 0.9    | 1.31    | 4.01   | 3.71    | 0.66    | 3.8    | 60.24  | 88.8   | 53.27  |        |
| 1-2.e27908/1/1639  | mitochondrial ATP synthase     | 148223359 | NP_00108012 | 910.73  | 347.83  | 795.13 | 642.95  | 705.2  | 337.79  | 527.43  | 601.2  | 476.2  | 92.8   | 60.89  | 164.88 |
| 3-6.e13558/1/3921  | uncharacterized protein LOC    | 148222755 | NP_00108958 | 5.47    | 19.04   | 3.82   | 2.9     | 5.61   | 6.03    | 4.53    | 3.08   | 2.51   | 0.8    | 0.61   | 0.64   |
| 3-6.c18827/1/3169  | double-stranded RNA-bindin     | 350606338 | NP_00101137 | 0       | 1.59    | 0      | 1.94    | 0      | 1.93    | 0       | 0      | 1.06   | 0      | 0      | 0      |
| 1-2.e11532/1/1238  | PREDICTED: LOW QUALI           | 296197462 | XP_00280672 | 9.24    | 11.14   | 13.93  | 25.06   | 0      | 0       | 21.17   | 1.24   | 8.67   | 116.76 | 165.94 | 206.27 |
| 1-2.e46837/5/1616  | PREDICTED: tropomyosin a       | 847143250 | XP_01282187 | 0       | 0       | 0.13   | 0.23    | 0.3    | 0       | 0.4     | 0      | 91.14  | 110.67 | 0      | 0      |
| 2-3.c45717/1/2572  | PREDICTED: striatin-interac    | 847114855 | XP_01281550 | 3.24    | 5.14    | 4.14   | 2.17    | 3.4    | 8.15    | 1.12    | 1.36   | 3.09   | 0.4    | 0.68   | 0.18   |
| 2-3.c47497/1/1942  | --                             | --        | 16.72       | 7.09    | 35.79   | 30.13  | 29.15   | 28.99  | 30.53   | 19.75   | 31.11  | 3.16   | 6.29   | 5.16   | 0      |
| 1-2.e23339/1/1762  | uncharacterized protein LOC    | 148232016 | NP_00109117 | 0.01    | 0       | 45.88  | 46.2    | 156.03 | 2.19    | 89.28   | 82.31  | 33.27  | 0      | 0      | 0      |
| 3-6.e15931/1/4367  | collagen, type 1, alpha 2 prec | 147898763 | NP_00108072 | 1.05    | 9.89    | 0.66   | 1.29    | 2.2    | 3.54    | 0       | 1.33   | 0.21   | 0.72   | 0.04   | 0      |
| 1-2.e28914/2/1725  | PREDICTED: junctophilin-2      | 301607262 | XP_00293323 | 59.56   | 41.57   | 122.61 | 71.44   | 67.68  | 136.74  | 72.77   | 81.03  | 89.37  | 13.28  | 12.52  | 22.86  |
| 2-3.c30327/2/2348  | RecName: Full=Voltage-dep      | 46576355  | O57483.1    | 4.55    | 2       | 7.97   | 1.93    | 7.16   | 11.49   | 3.09    | 4.6    | 3.4    | 0      | 0.19   | 1.02   |
| 3-6.c34624/4/186   | uncharacterized protein LOC    | 148223037 | NP_00108484 | 30.17   | 37.35   | 22.51  | 17.69   | 22     | 25.06   | 14.8    | 17.45  | 18.36  | 2.75   | 4.18   | 4.77   |
| 1-2.e17477/1/1373  | LOC100145612 protein [Xen      | 170285152 | AAI61369.1  | 0       | 0.43    | 0      | 0       | 0      | 0.09    | 0.99    | 0      | 2.89   | 4.17   | 11.79  | 3.05   |
| 1-2.e29894/1/3175  | PREDICTED: malate dehydr       | 768365243 | XP_01157985 | 479.61  | 186.28  | 467.81 | 431.39  | 508.42 | 177.85  | 231.1   | 328.84 | 377.43 | 53.08  | 17.71  | 128.65 |
| 2-3.c13830/1/2302  | eukaryotic translation initiat | 148232020 | NP_00108075 | 0       | 0       | 5.16   | 0       | 0      | 0       | 0       | 0      | 0.05   | 6      | 6.04   | 0      |
| 2-3.c42158/3/2603  | PREDICTED: protein Shroor      | 558149116 | XP_00612025 | 1.51    | 4.85    | 2.73   | 1.31    | 1.08   | 0.66    | 0.23    | 1.09   | 0.89   | 28.21  | 69.63  | 32.71  |
| 1-2.c13981/1/1373  | --                             | --        | 7.96        | 11.45   | 17.4    | 7.73   | 11.2    | 9.07   | 4.33    | 11.16   | 14.75  | 0.53   | 1.09   | 1.31   | 0      |
| 2-3.c54729/1/2158  | PREDICTED: keratin, type II    | 543747793 | XP_00551465 | 26.98   | 7.03    | 22.28  | 16.75   | 51.48  | 10.18   | 55.41   | 20.29  | 16.71  | 0.11   | 0.93   | 0      |
| 2-3.c4502/3/2620   | Geneb-a protein [Xenopus lac   | 213623820 | AAI70263.1  | 0       | 6.06    | 0.29   | 0.11    | 0.27   | 1.66    | 1.44    | 0.2    | 0.14   | 11.78  | 8      | 24.85  |
| 2-3.e59445/1/2342  | --                             | --        | 6.58        | 7.98    | 7.69    | 9.84   | 13.23   | 7.51   | 6.21    | 8.27    | 12.51  | 1.3    | 0.71   | 2.4    | 0      |
| 1-2.c32568/1/1568  | MGC84445 protein [Xenopus      | 51703940  | AAH81189.1  | 0       | 4.67    | 0      | 0       | 0      | 1.86    | 0.42    | 0      | 0      | 11.17  | 16.28  | 20.76  |
| 1-2.e17943/1/1365  | nucleolin [Xenopus laevis]>g   | 148226518 | NP_00108155 | 42.99   | 264.41  | 33.23  | 34.21   | 65.46  | 141.37  | 39.74   | 33.82  | 37.98  | 5.31   | 3.95   | 11.04  |
| 2-3.c5492/1/1976   | ryanodine receptor beta isofo  | 29501272  | BAA04647.2  | 10.11   | 12.36   | 54.02  | 31.75   | 32.21  | 34.96   | 50.05   | 44.18  | 56.3   | 8.29   | 1.21   | 7.26   |
| 1-2.e9865/1/1341   | actin, alpha cardiac muscle 2  | 45361557  | NP_989355.1 | 5.08    | 0.23    | 21.65  | 8.29    | 6.96   | 13.03   | 12.55   | 21.2   | 10.68  | 1.27   | 1.09   | 0.76   |
| 2-3.e15687/1/2537  | transforming growth factor, b  | 147906015 | NP_00108870 | 39.34   | 25.61   | 51.57  | 34.83   | 38.33  | 24.56   | 30.54   | 41.93  | 23.77  | 4.02   | 1.48   | 8.61   |
| 2-3.c23873/1/1947  | --                             | --        | 5.27        | 4.84    | 1       | 3.11   | 1.52    | 0.96   | 3.01    | 4.74    | 3.77   | 40.37  | 41.76  | 36.94  | 0      |
| 2-3.c8669/1/2354   | tubulin, gamma complex assc    | 148230420 | NP_00108761 | 1.28    | 7.34    | 1.69   | 2.71    | 1.2    | 1.89    | 1.76    | 1      | 0.9    | 0.21   | 0      | 0      |
| 1-2.e11081/10/1599 | keratin 5, gene 1 [Xenopus (S  | 54020785  | NP_00100563 | 2.92    | 0       | 0      | 0       | 3.57   | 3.92    | 0       | 0.02   | 0      | 0      | 0      | 0      |
| 2-3.c48907/1/2161  | PREDICTED: ras-related pro     | 641749811 | XP_00816483 | 0       | 6.68    | 2.26   | 0       | 0      | 1.14    | 4.27    | 0      | 2.08   | 3.02   | 6.19   | 0      |
| 1-2.c19268/3/1667  | --                             | --        | 1062.26     | 1228.62 | 1675.64 | 730.73 | 1050.06 | 325.85 | 1554.38 | 1018.37 | 903.67 | 268.86 | 46.33  | 50.46  | 0      |
| 1-2.e19667/1/1423  | thioredoxin domain-containin   | 118405096 | NP_00107253 | 0       | 0       | 0      | 0       | 0      | 0       | 0       | 0      | 24.94  | 6.94   | 4.2    | 0      |
| 1-2.e11476/1/1711  | --                             | --        | 0           | 1.47    | 4.35    | 15.67  | 4.33    | 6.76   | 0       | 0       | 4.97   | 0      | 0      | 0.84   | 0      |
| 1-2.c23763/1/1810  | parvalbumin beta protein [Ra   | 20797085  | CAC95153.1  | 292.92  | 90.7    | 574.91 | 405.49  | 604.74 | 1409.19 | 527.01  | 565.48 | 632.16 | 115.7  | 71.02  | 93.56  |
| 1-2.e11848/1/1583  | fructose-1,6-bisphosphatase 2  | 291290927 | NP_00116745 | 11.77   | 4.07    | 8.94   | 22.93   | 9.14   | 12.87   | 17.43   | 15     | 22.93  | 1.68   | 4.62   | 0.45   |
| 1-2.e46671/1/1365  | LOC100144989 protein [Xen      | 165971120 | AAI58328.1  | 19.87   | 22.19   | 6.49   | 10.88   | 5.2    | 14.2    | 4.98    | 3.04   | 0.89   | 0.72   | 3.23   | 0      |
| 1-2.c36683/1/1466  | PREDICTED: serine/arginine     | 700322225 | XP_00992747 | 0       | 0       | 10.47  | 0       | 0      | 0       | 0.78    | 0      | 0      | 36.59  | 87.1   | 0      |
| 2-3.e5145/8/2501   | gsn protein [Xenopus (Silurar  | 159155320 | AAI54876.1  | 54.71   | 60.57   | 61.87  | 52.66   | 79.49  | 53.66   | 40.7    | 58.41  | 54.27  | 6.57   | 0      | 25.28  |
| 2-3.e59275/1/2666  | Unknown (protein for IMAG      | 197246230 | AAI68800.1  | 3.94    | 0.77    | 3.73   | 3.54    | 2.4    | 1.67    | 0       | 4.1    | 3.03   | 0      | 0      | 0.51   |
| 1-2.c42493/226/16  | ubiquinol-cytochrome c reduct  | 148222361 | NP_00108668 | 583.01  | 199.71  | 311.83 | 317.52  | 449.59 | 234.67  | 271.7   | 282.38 | 246.57 | 90.41  | 18.57  | 83.28  |
| 1-2.c34068/1/1339  | --                             | --        | 3.35        | 7.71    | 9.34    | 12.35  | 6.31    | 4.95   | 2.9     | 4.14    | 4.46   | 0.96   | 0.91   | 0.5    | 0      |
| 2-3.c45394/2/1931  | --                             | --        | 1.64        | 2.11    | 0.61    | 2.22   | 0       | 0.65   | 0       | 1.89    | 2.18   | 18.61  | 19.69  | 39.14  | 0      |
| 1-2.c12249/1/1519  | --                             | --        | 18.28       | 4.68    | 23.81   | 11.17  | 17.65   | 7.79   | 59.52   | 0       | 35.98  | 202.92 | 297.02 | 195.36 | 0      |
| 2-3.e19255/1/2595  | ribosomal protein S6 kinase,   | 39794417  | AAH64239.1  | 0.87    | 7.89    | 0.12   | 0       | 2.81   | 5.04    | 2.33    | 1.42   | 0      | 0.01   | 0      | 0      |
| 1-2.e41582/2/1799  | high mobility group protein 2  | 55742128  | NP_00100676 | 0.7     | 3.53    | 1.21   | 1.56    | 0.52   | 2.33    | 1.42    | 0.45   | 0      | 0      | 0      | 0      |
| 2-3.c14227/6/2342  | kinectin [Xenopus (Silurana)   | 194018594 | NP_00112338 | 0.71    | 0       | 0      | 0       | 0      | 0       | 0       | 0      | 0      | 0      | 4.81   | 5.22   |

|                    |                                 |           |             |         |        |         |         |         |         |         |         |         |         |        |         |
|--------------------|---------------------------------|-----------|-------------|---------|--------|---------|---------|---------|---------|---------|---------|---------|---------|--------|---------|
| 1-2.c48064/5/1310  | actin, alpha skeletal muscle B  | 820145793 | KKX13565.1  | 12.99   | 1.65   | 12.75   | 16.2    | 21.2    | 9.6     | 13.13   | 14.4    | 8.29    | 1.94    | 1.17   | 3.39    |
| 1-2.e11329/1/1537  | uncharacterized protein LOC     | 147905311 | NP_00109060 | 0       | 0      | 0       | 0       | 0       | 0       | 2.29    | 2.96    | 0       | 13.41   | 0      | 26.68   |
| 2-3.e25435/5/2426  | PREDICTED: Fanconi anemi        | 301621609 | XP_00294013 | 1.02    | 7.03   | 1.5     | 2.55    | 2.36    | 3.38    | 1.77    | 0.85    | 1.99    | 0.61    | 0      | 0       |
| 1-2.c36045/1/5902  | --                              | --        | --          | 0       | 15.77  | 0       | 0       | 0       | 0       | 0       | 0       | 0       | 49.29   | 33.37  | 0       |
| 1-2.e29268/2/1598  | --                              | --        | --          | 3.29    | 5.01   | 2.42    | 0       | 1.74    | 3.13    | 0       | 0.8     | 1.26    | 32.14   | 50.09  | 22.67   |
| 1-2.c38662/1/1731  | --                              | --        | --          | 1.4     | 0      | 0       | 0       | 0       | 0       | 0       | 0.83    | 0       | 5.41    | 3.88   | 3.89    |
| 2-3.c8132/1/2615   | RecName: Full=Transitional      | 257051069 | P23787.3    | 0       | 0.01   | 0       | 0.09    | 0       | 0       | 0       | 0       | 0       | 0       | 16.61  | 17.59   |
| 1-2.e38843/1/1295  | --                              | --        | --          | 4.41    | 0.57   | 0.72    | 2.16    | 3.59    | 1.82    | 15.07   | 4.04    | 3.97    | 45.4    | 68.66  | 52.23   |
| 1-2.c34363/1/1710  | PREDICTED: glycine dehydr       | 512813230 | XP_00293422 | 0       | 0      | 0       | 0       | 0       | 0       | 3.09    | 0.17    | 0.04    | 7.31    | 0      | 10.83   |
| 1-2.c50616/1/1305  | serpin peptidase inhibitor, cla | 147899187 | NP_00108698 | 2.07    | 11.29  | 3.54    | 0       | 4.31    | 5.55    | 0       | 0       | 0       | 0       | 0      | 0       |
| 2-3.e12268/1/6515  | calsequestrin 1 (fast-twitch, s | 148231736 | NP_00108022 | 19.15   | 1.97   | 53.06   | 30.96   | 38.04   | 39.63   | 34.54   | 36.09   | 42.58   | 11.44   | 3.79   | 3.57    |
| 2-3.c16250/1/1939  | --                              | --        | --          | 0       | 0      | 0       | 0.01    | 0       | 0       | 0       | 2.66    | 0       | 5.88    | 0      | 8.2     |
| 2-3.c4368/1/2565   | LOC398050 protein [Xenopus      | 126362056 | AAI31885.1  | 5.72    | 3.85   | 10.75   | 5.75    | 5.9     | 1.32    | 1.75    | 2.41    | 6.07    | 0.01    | 0.37   | 0.78    |
| 2-3.c47583/1/2542  | phospholipid-transporting AT    | 71896237  | NP_00102556 | 0.35    | 1.04   | 1.11    | 1.11    | 0.51    | 0.91    | 6.77    | 0.89    | 0.31    | 10.99   | 13.11  | 30.02   |
| 1-2.c4810/2/1417   | --                              | --        | --          | 10.15   | 2.68   | 0       | 5.15    | 16.9    | 1.02    | 22.57   | 22.09   | 5.91    | 91.91   | 213.44 | 153.64  |
| 1-2.e2762/2/1/1410 | --                              | --        | --          | 43.35   | 43.76  | 91.72   | 60.06   | 118.74  | 361.23  | 76.43   | 51.82   | 128.64  | 1.17    | 1.81   | 5.38    |
| 1-2.e29299/1/6568  | translation elongation factor I | 211907091 | ACJ12080.1  | 50.1    | 0      | 0       | 2.93    | 0       | 108.77  | 195.65  | 97.81   | 170.45  | 531.52  | 929.28 | 423.82  |
| 1-2.c34897/1/1681  | uncharacterized protein LOC     | 147906566 | NP_00109117 | 0       | 0      | 0       | 0       | 0       | 0       | 0       | 0       | 0       | 8.55    | 11.34  | 0       |
| 1-2.c27548/1/1312  | --                              | --        | --          | 0       | 0      | 0       | 0       | 0       | 0       | 0       | 0       | 0       | 20.68   | 54.77  | 3.33    |
| 2-3.e54690/1/2116  | carnitine O-acetyltransferase   | 73853812  | NP_00102748 | 2.29    | 1.58   | 2.6     | 6.91    | 4.8     | 4.12    | 4.7     | 2.32    | 3.41    | 0.55    | 0.17   | 0.95    |
| 1-2.c39955/1/1222  | --                              | --        | --          | 117.21  | 132.71 | 279.97  | 190.63  | 322.71  | 1026.27 | 251.44  | 160.2   | 392.66  | 4.6     | 11.69  | 12.88   |
| 3-6.e5011/1/3331   | cGMP-dependent 3',5'-cyclic     | 118404742 | NP_00107260 | 2.18    | 2.83   | 1.05    | 0.59    | 0.57    | 1.02    | 0       | 1.26    | 0.07    | 0       | 0      | 0       |
| 3-6.e15513/1/2974  | PREDICTED: transforming a       | 847151927 | XP_01282315 | 7.94    | 4.53   | 15.44   | 11.79   | 12.61   | 4.07    | 6.46    | 11.99   | 12.72   | 0       | 5.3    | 0.29    |
| 2-3.c28740/1/2167  | Na-K-2Cl cotransporter 1 [Xen   | 147904042 | NP_00109133 | 1.44    | 1.66   | 0.31    | 0.8     | 1.18    | 0.64    | 3.11    | 1.4     | 0.55    | 19      | 15     | 25.37   |
| 2-3.c14168/4/2428  | gml3-prov protein, partial [Xen | 38649400  | AAH63220.1  | 29.31   | 18.22  | 20.6    | 14.11   | 10.82   | 21.42   | 15.1    | 15.02   | 12.41   | 2.28    | 1.81   | 3.31    |
| 1-2.e35673/1/1491  | --                              | --        | --          | 2.6     | 4.41   | 0       | 1.44    | 2.56    | 2.25    | 0       | 2.56    | 0.21    | 30.26   | 63.9   | 40.14   |
| 3-6.e7532/1/2819   | aryl hydrocarbon receptor nuc   | 154147739 | NP_00109368 | 0.27    | 6.58   | 0.34    | 0.46    | 0.27    | 0.44    | 0.26    | 0.3     | 0.15    | 7.67    | 14.59  | 8.36    |
| 3-6.c8035/1/3000   | PREDICTED: sarcalumenin i       | 641794149 | XP_00816075 | 22.98   | 2.36   | 18.29   | 26.87   | 19.62   | 8.02    | 17.63   | 19.14   | 32.98   | 2.34    | 2.73   | 3.98    |
| 1-2.e27528/1/1411  | --                              | --        | --          | 3.31    | 5.38   | 0       | 2.8     | 1.73    | 3.9     | 3.44    | 4.91    | 3.63    | 57.43   | 44.09  | 64.06   |
| 1-2.c33876/2/1279  | PREDICTED: nebulin isofor       | 847166510 | XP_01282661 | 0       | 0      | 0       | 0       | 0       | 0       | 0       | 0       | 0       | 15.84   | 11.32  | 0       |
| 1-2.c25614/1/1758  | --                              | --        | --          | 0       | 0      | 0       | 0       | 0       | 0       | 0       | 0       | 0       | 2.97    | 7.82   | 1.56    |
| 2-3.e59623/1/2618  | casein kinase I isoform alpha   | 820135221 | KKX08385.1  | 0       | 2.11   | 0       | 1.86    | 1.81    | 0       | 0.5     | 0       | 0       | 0       | 0      | 0       |
| 2-3.c34956/1/2515  | PREDICTED: zinc finger pro      | 847170543 | XP_01280875 | 0       | 1.93   | 0       | 1.49    | 0       | 0.86    | 0.05    | 0       | 0.27    | 19.7    | 27.26  | 11.26   |
| 1-2.c13291/1/1454  | PREDICTED: keratin, type II     | 699641559 | XP_00987834 | 39.25   | 31.79  | 30.49   | 22.86   | 78.83   | 25.95   | 72.18   | 39.08   | 30.17   | 0.49    | 0.96   | 2.43    |
| 2-3.c45713/1/2007  | oxysterols receptor LXR-beta    | 118403952 | NP_00107285 | 0       | 1.29   | 0.01    | 0.07    | 0       | 0.07    | 0       | 0       | 0       | 5.11    | 2.96   | 4.76    |
| 3-6.c16452/1/3721  | NODAL modulator 3 precurs       | 189230238 | NP_00112144 | 2.19    | 13.1   | 2.31    | 0       | 4.68    | 12.23   | 0       | 0.1     | 0       | 0       | 0      | 0       |
| 2-3.c35848/1/2139  | --                              | --        | --          | 10.88   | 3.54   | 31.85   | 19.42   | 20.42   | 19.57   | 20.41   | 20.06   | 19.69   | 4.1     | 1.99   | 4.08    |
| 2-3.e13579/1/7723  | calsequestrin 1 (fast-twitch, s | 148231736 | NP_00108022 | 7.43    | 0.82   | 29.86   | 19.62   | 31.74   | 20.91   | 16.93   | 18.5    | 27.35   | 0.71    | 0      | 7.69    |
| 1-2.c19610/1/1363  | zygotie DNA replication licer   | 212286112 | NP_00113103 | 0.42    | 15.27  | 1.45    | 0.35    | 3.2     | 3.14    | 0       | 0.68    | 0.89    | 0       | 0      | 0       |
| 1-2.c24202/1/1778  | --                              | --        | --          | 0.14    | 27.27  | 0.15    | 0.14    | 0.05    | 0.37    | 0       | 0       | 10.13   | 66.63   | 76.01  | 0.73    |
| 1-2.c35007/1/1540  | PREDICTED: pyruvate dehy        | 512866108 | XP_00293466 | 1.34    | 0      | 1.05    | 3.03    | 2.55    | 1.18    | 1.6     | 0.3     | 0.13    | 0.14    | 0      | 0       |
| 2-3.c19990/3/2040  | PREDICTED: voltage-depen        | 823417697 | XP_01241955 | 10.77   | 9.56   | 14.42   | 21.8    | 19.43   | 21.45   | 14.37   | 7.05    | 13.45   | 8.1     | 0      | 2.56    |
| 1-2.c2057/25/1807  | desmin [Xenopus laevis]>gii1    | 148224383 | NP_00108017 | 117.82  | 69.13  | 113.95  | 49.29   | 100.36  | 99.55   | 67.33   | 82.95   | 64.7    | 21.82   | 20.86  | 7.92    |
| 1-2.e28418/3/1441  | voltage-dependent anion-sele    | 148225606 | NP_00108935 | 37.2    | 2.03   | 26.97   | 27      | 28.37   | 20.44   | 22.13   | 32.09   | 17.96   | 4.81    | 3.24   | 4.76    |
| 2-3.c17554/1/2470  | .beta-enolase [Gallus gallus]>  | 46048765  | NP_990450.1 | 1087.49 | 57.65  | 1958.02 | 2906.51 | 2334.43 | 655.75  | 2303.17 | 2159.92 | 3342.82 | 216.64  | 38.96  | 319.54  |
| 2-3.c6406/2/2258   | PREDICTED: angiopoietin-n       | 847161289 | XP_01282520 | 0.73    | 0      | 1.31    | 0       | 0       | 0.3     | 0       | 1.61    | 2.41    | 6.87    | 4.63   | 3.07    |
| 1-2.e49295/1/1348  | --                              | --        | --          | 1.22    | 1.67   | 0       | 2.07    | 1.57    | 2.43    | 0.12    | 0.62    | 0.4     | 0       | 0      | 0       |
| 1-2.e11669/1/1812  | --                              | --        | --          | 19.26   | 35.42  | 14.69   | 13.78   | 15.27   | 27.09   | 4.16    | 12.07   | 19.14   | 0.77    | 0.91   | 1.6     |
| 2-3.c6683/1/2259   | PREDICTED: LOW QUALI            | 543714928 | XP_00549874 | 9.85    | 2.97   | 12.47   | 9.42    | 6.87    | 6.37    | 0       | 3.65    | 0       | 0       | 3.14   | 0       |
| 2-3.c6736/1/2605   | PREDICTED: collagen alpha       | 512859351 | XP_00491692 | 4.93    | 19.13  | 10.92   | 6.99    | 8.69    | 7.85    | 2.04    | 3.8     | 5.59    | 0.83    | 1.43   | 1.36    |
| 2-3.c9365/6/2428   | alpha 1 type I collagen [Rana   | 3242649   | BAA29028.1  | 22.37   | 693.8  | 89.69   | 46.6    | 40.86   | 191.76  | 26.49   | 21.63   | 42.91   | 1.93    | 0      | 1.52    |
| 1-2.c7916/1/1691   | PREDICTED: fumarate hydr        | 512842641 | XP_00293586 | 30.8    | 47.52  | 54.2    | 45.33   | 25.08   | 33.64   | 23.68   | 48.55   | 0       | 4.93    | 4.85   | 8.59    |
| 1-2.e16868/1/1351  | --                              | --        | --          | 0       | 0.55   | 0       | 3.15    | 0       | 0       | 9.1     | 2.24    | 2.51    | 54.19   | 58.02  | 12.52   |
| 2-3.c35520/1/2048  | fast troponin I [Rana catesbei  | 58397794  | AAW73073.1  | 3547.28 | 981.64 | 7323.49 | 4942.62 | 5737.54 | 6030.37 | 5585.69 | 6829.51 | 4374.82 | 1257.94 | 841.84 | 1256.12 |
| 2-3.c40893/1/1959  | --                              | --        | --          | 23.83   | 4.29   | 19.75   | 14.97   | 12.59   | 7.63    | 7.31    | 4.91    | 18.78   | 0.4     | 3.87   | 1.7     |
| 2-3.e16341/1/2504  | eukaryotic elongation factor    | 187607479 | NP_00112014 | 3.79    | 2.66   | 2.12    | 8.02    | 7.4     | 2.5     | 4.65    | 0.97    | 1.76    | 0.37    | 0.3    | 1.65    |
| 2-3.c20378/1/3092  | PREDICTED: glucosylceram        | 557017449 | XP_00600913 | 0       | 2.88   | 0       | 6.39    | 0       | 2.42    | 9.72    | 0       | 0.88    | 61.02   | 98.48  | 33.83   |
| 1-2.c8698/2/1160   | calreticulin precursor [Xenop   | 148230491 | NP_00108076 | 0       | 0      | 0       | 0       | 21.12   | 59.12   | 0       | 0       | 0       | 0       | 0      | 0       |

|                                                   |                                 |           |             |        |         |         |         |         |         |         |         |        |         |         |         |
|---------------------------------------------------|---------------------------------|-----------|-------------|--------|---------|---------|---------|---------|---------|---------|---------|--------|---------|---------|---------|
| 1-2.c24235/2/1712                                 | --                              | --        | 0           | 0      | 0       | 0       | 0       | 0       | 0       | 0       | 2.85    | 2.3    | 3.7     | 2.96    |         |
| 1-2.c32790/1/1501                                 | phosphatidylinositol 3,4,5-tri  | 183986707 | NP_00111694 | 0.95   | 0       | 0       | 0       | 0       | 0       | 0.86    | 0       | 5.12   | 3.3     | 1.68    |         |
| 2-3.c6000/5/2118                                  | thrombospondin-4 precursor      | 118404528 | NP_00107267 | 8.08   | 10.79   | 23.68   | 8.73    | 4.17    | 22.72   | 8       | 10.78   | 12.9   | 0       | 0.94    |         |
| 1-2.c34593/1/1637                                 | PREDICTED: ATP-binding c        | 699653275 | XP_00989685 | 0      | 0       | 1.58    | 1.55    | 0       | 0       | 1.21    | 0       | 1.88   | 22.52   | 32.67   | 7.65    |
| 2-3.c14094/1/2005                                 | PREDICTED: pyridine nucle       | 512851997 | XP_00293648 | 0.85   | 2.88    | 1.41    | 1.25    | 1.57    | 0.95    | 0.49    | 0.4     | 0.47   | 0       | 0       | 0       |
| 2-3.c38424/1963                                   | cAMP-specific 3',5'-cyclic ph   | 118403894 | NP_00107286 | 4.94   | 5.31    | 1.82    | 3.03    | 4.64    | 0       | 0       | 0.25    | 0      | 0       | 0       | 0       |
| 1-2.c47233/3/1591                                 | PREDICTED: rho GTPase-ac        | 512862460 | XP_00491733 | 0      | 0       | 0       | 0       | 0       | 0       | 0       | 0       | 0      | 8.5     | 7.49    | 0       |
| 2-3.c20719/5/2123                                 | PREDICTED: non-syndromic        | 847139923 | XP_01282102 | 232.98 | 4.89    | 29.83   | 116.18  | 172.16  | 0.86    | 19.63   | 87.05   | 90.07  | 0.16    | 0       | 2.3     |
| 2-3.c13194/2/2160                                 | PREDICTED: talin-1 isoform      | 768398998 | XP_01159535 | 0      | 0       | 0       | 0       | 0       | 0       | 0.83    | 0       | 1.07   | 45.42   | 0       | 19.75   |
| 1-2.c25728/1/1353                                 | PREDICTED: elongation fac       | 573878959 | XP_00662770 | 67.81  | 130.93  | 124.92  | 31.63   | 14.72   | 20.49   | 31.98   | 14.38   | 21.33  | 11.25   | 0       | 0       |
| 2-3.c14172/1/2182                                 | YTH domain family protein 1     | 431894607 | ELK04407.1  | 0      | 0.55    | 0       | 0       | 0.51    | 0.97    | 12.23   | 0       | 2.08   | 11.11   | 16.35   | 9.85    |
| 2-3.c40760/1/2202                                 | pyruvate kinase PKM isoform     | 118405080 | NP_00107253 | 216.44 | 0       | 180.79  | 342.75  | 280.5   | 0       | 112.85  | 266.29  | 346.97 | 8.13    | 0       | 0       |
| 2-3.c61595/4/2205                                 | PREDICTED: protein PRRC:        | 512859823 | XP_00294134 | 4.85   | 41.12   | 17.82   | 0.04    | 0.02    | 0       | 0       | 0.63    | 0      | 0.17    | 23.87   | 16.32   |
| 3-6.c10887/2/2945                                 | eukaryotic translation initiat  | 148232020 | NP_00108075 | 0      | 0.95    | 0       | 0.28    | 0.92    | 1.21    | 0.47    | 0       | 0      | 0       | 0       | 0       |
| 2-3.c34444/1/2620                                 | --                              | --        | --          | 110.28 | 9.78    | 24.26   | 144.98  | 54.26   | 29.65   | 253.43  | 97.74   | 152.5  | 1162.86 | 1884.88 | 1090.96 |
| 3-6.c18459/1/3360                                 | PREDICTED: chloride chanr       | 874464599 | XP_01295201 | 6.22   | 0.08    | 3.47    | 2.74    | 6.44    | 4.77    | 2.24    | 3.72    | 6.76   | 0       | 0       | 1.69    |
| 1-2.c44663/1/1360                                 | --                              | --        | --          | 4.61   | 4.94    | 15.47   | 11.63   | 8.31    | 35.65   | 11.67   | 7.68    | 9.15   | 1.31    | 0.18    | 0.49    |
| 1-2.c27329/2/1774                                 | agmatine ureohydrolase (agm     | 147900416 | NP_00108921 | 28.07  | 14.17   | 44.88   | 42.36   | 34.37   | 29.83   | 30.84   | 30.24   | 37.58  | 4.39    | 6.84    | 8.62    |
| 1-2.c14017/1/1749                                 | PREDICTED: schwannomin          | 847126596 | XP_01281810 | 1.31   | 0       | 0       | 0       | 0       | 0       | 1.83    | 0       | 0      | 4.84    | 3.26    | 0.67    |
| 2-3.c24654/2/2447                                 | --                              | --        | --          | 25.74  | 11.61   | 46.16   | 37.24   | 31.86   | 48.1    | 31.76   | 28.42   | 37.66  | 7.13    | 5.35    | 9.41    |
| 2-3.c54289/1/2248                                 | PREDICTED: G protein-coupl      | 765112974 | XP_01147901 | 0      | 0.24    | 0       | 0       | 4.06    | 3.98    | 0       | 0       | 0.63   | 0       | 0       | 0       |
| 2-3.c62672/1046/24calsequestrin 1 (fast-twitch, s |                                 | 148231736 | NP_00108022 | 20.58  | 1.85    | 60.87   | 20.76   | 40.59   | 22.37   | 14.42   | 46.69   | 30.65  | 7.05    | 4.23    | 4.91    |
| 3-6.c2699/13/3594                                 | PREDICTED: polyadenylate-       | 696972430 | XP_00955615 | 31     | 22.51   | 8.72    | 10.69   | 14.24   | 9.22    | 1.58    | 9.71    | 7.17   | 2.5     | 1.4     | 2.25    |
| 1-2.c7395/2/1275                                  | --                              | --        | --          | 0      | 0       | 0       | 1.19    | 0       | 1.66    | 2.51    | 0       | 0      | 31.88   | 25.37   | 14.18   |
| 3-6.c10939/1/4150                                 | sarcospan [Xenopus laevis]>1    | 147902306 | NP_00108856 | 19.96  | 18.63   | 27.25   | 17.99   | 24.76   | 35.94   | 12.39   | 14.43   | 20.84  | 3.36    | 2.49    | 6.48    |
| 2-3.c39066/1/2144                                 | PREDICTED: nebulin-relatec      | 699588075 | XP_00986535 | 3.95   | 1.87    | 8.33    | 4.17    | 4.55    | 4.71    | 1.24    | 2.82    | 3.33   | 0.34    | 0.56    | 0.56    |
| 1-2.c1797/58/1597                                 | claudin-3 [Xenopus (Silurana    | 54020932  | NP_00100570 | 1.95   | 0.44    | 0       | 0       | 0.43    | 0.52    | 0       | 1.83    | 0      | 12      | 8.35    | 32.44   |
| 1-2.c5202/1/5612.3                                | platelet-derived growth factor  | 71896169  | NP_00102558 | 34.04  | 6.76    | 28.96   | 8.64    | 8.14    | 0       | 0.09    | 13.01   | 0      | 0       | 0       | 0       |
| 1-2.c52245/4/1435                                 | PREDICTED: endoplasmic re       | 847110350 | XP_01281465 | 0      | 0       | 0       | 0       | 0       | 0       | 0       | 2.52    | 4.44   | 14.38   | 24.98   | 0       |
| 2-3.c58866/1/1993                                 | --                              | --        | --          | 16.58  | 35.44   | 20.45   | 13.34   | 16.25   | 31.28   | 8.31    | 14.16   | 14.19  | 3.87    | 2.02    | 2.37    |
| 2-3.c19813/1/2100                                 | PREDICTED: interleukin enl      | 847169995 | XP_01280854 | 7.94   | 2.95    | 0       | 0       | 8.94    | 5.02    | 0       | 0       | 3.21   | 0       | 0       | 0       |
| 3-6.c6658/1/6035.1                                | PREDICTED: sarcoplasmic/c       | 847174969 | XP_01281038 | 2659.1 | 263.16  | 15.4    | 2720.88 | 3603.4  | 2169.71 | 2111.72 | 2983.87 | 18     | 388.45  | 327.78  | 977.86  |
| 1-2.c31258/1/1390                                 | PREDICTED: CCR4-NOT tr          | 557006273 | XP_00600468 | 5.06   | 7.4     | 1.26    | 4.87    | 0       | 1.4     | 1.04    | 0.27    | 0      | 48.33   | 50.87   | 32.34   |
| 1-2.c48828/1/1729                                 | --                              | --        | --          | 17.41  | 4.84    | 11.94   | 10.44   | 12.62   | 4.27    | 39.11   | 2.63    | 16.15  | 159.26  | 230.87  | 120.2   |
| 2-3.c13721/2/2489                                 | RecName: Full=Voltage-dep       | 46576355  | O57483.1    | 5.5    | 0.8     | 17.04   | 6.81    | 14.08   | 9.13    | 6.59    | 9.87    | 11.41  | 0.84    | 0.69    | 3.09    |
| 1-2.c17529/2/1762                                 | polypyrimidine tract-binding    | 118404352 | NP_00107247 | 4.37   | 16.92   | 4.44    | 2.62    | 5.43    | 12.72   | 4.81    | 3.16    | 4.5    | 0       | 0       | 0.94    |
| 1-2.c35432/1/1298                                 | uncharacterized protein LOC     | 187608717 | NP_00112040 | 0      | 0       | 0       | 0       | 0       | 0       | 0       | 0       | 0      | 9.52    | 9.24    | 0       |
| 2-3.c44036/2/2082                                 | OTTXETP00000002159 [Xen         | 89272520  | CAJ83768.1  | 0.17   | 7.16    | 0.12    | 0       | 2.18    | 2.65    | 0       | 0       | 0      | 0       | 0       | 0       |
| 2-3.c2189/9/2415.1                                | PREDICTED: protein FAM1         | 512881655 | XP_00294317 | 0.36   | 0       | 2.64    | 1.77    | 3.86    | 1.33    | 0.56    | 0       | 0      | 0       | 0       | 0       |
| 1-2.c35935/1/1404                                 | --                              | --        | --          | 2.02   | 20.38   | 4.05    | 2.56    | 0.74    | 2.36    | 0.09    | 1.44    | 0.95   | 0       | 0       | 0       |
| 2-3.c56473/1/2099                                 | 3-hydroxyisobutyrate dehydr     | 718960099 | NP_00102566 | 9.78   | 8.15    | 16.94   | 10.65   | 17.61   | 14.19   | 7.99    | 11.48   | 7.87   | 0       | 0.69    | 1.93    |
| 3-6.c3226/2/3320                                  | ubiquinol-cytochrome-c redu     | 147900400 | NP_00108188 | 4.94   | 7.38    | 3.33    | 9.33    | 12.04   | 5.73    | 3.45    | 2.49    | 6.93   | 1.31    | 0.84    | 2.41    |
| 1-2.c38168/1/10757                                | --                              | --        | --          | 16.09  | 0       | 2.45    | 1.3     | 6.76    | 5.33    | 19.44   | 7.81    | 13.44  | 128.86  | 154.25  | 41.61   |
| 1-2.c4709/2/1650                                  | --                              | --        | --          | 4.9    | 4.83    | 0       | 0.25    | 0       | 0.65    | 2.19    | 0       | 0.92   | 13.34   | 8.19    | 8.49    |
| 2-3.c20770/1/2039                                 | LOC443692 protein, partial [    | 49119610  | AAH73734.1  | 3.33   | 0       | 0.19    | 0       | 2.44    | 2.58    | 2.29    | 2.27    | 1.14   | 0       | 0       | 0       |
| 1-2.c12280/2/1606                                 | PREDICTED: citrate synthas      | 617649484 | XP_00753343 | 26.45  | 85.77   | 73.59   | 126.5   | 73.79   | 58.23   | 141.04  | 82.81   | 18.15  | 6.37    | 4.28    | 36.53   |
| 1-2.c38321/1/1328                                 | aspartyl/asparaginyl beta-hyd   | 62751990  | NP_00101573 | 3.83   | 3.7     | 8.47    | 1.24    | 8.09    | 21.72   | 4.19    | 5.71    | 7.04   | 0       | 0       | 0       |
| 3-6.c9746/1/3536.1                                | --                              | --        | --          | 5.9    | 13.01   | 0.11    | 0       | 0       | 0       | 0       | 4.63    | 4.6    | 0       | 7.54    | 8.49    |
| 3-6.c2766/6/3194                                  | PREDICTED: semaphorin-3I        | 395539080 | XP_00377150 | 2.12   | 28.57   | 3.07    | 1.55    | 6.13    | 5.21    | 0.66    | 1.02    | 3.09   | 0.68    | 0.24    | 0.76    |
| 1-2.c12992/2/1651                                 | activating transcription factor | 147902692 | NP_00108695 | 27.4   | 44.65   | 32.41   | 34.88   | 33.14   | 39.92   | 22.98   | 14.95   | 31.51  | 6.59    | 3.24    | 9.43    |
| 1-2.c28729/1/1766                                 | hedghegog acyltransferase-like  | 147901798 | NP_00107945 | 89.3   | 11.98   | 77.1    | 101.65  | 112.42  | 53.41   | 32.58   | 62.68   | 54.78  | 13.72   | 23.03   | 19.24   |
| 1-2.c32609/3/1985                                 | PREDICTED: keratin, type I      | 512874187 | XP_00293908 | 837.47 | 1165.36 | 1476.59 | 894.62  | 1314.54 | 75.1    | 1211.48 | 839.72  | 803.52 | 37.59   | 3.28    | 6.75    |
| 1-2.c20912/1/1738                                 | provirus ancestral Env polypr   | 808862307 | KKF13889.1  | 31.92  | 72.28   | 5.29    | 17.34   | 19.17   | 11.17   | 102.18  | 12.55   | 28.56  | 390.46  | 279.19  | 173.1   |
| 1-2.c50838/1/1446                                 | --                              | --        | --          | 0      | 7.93    | 3.11    | 5.65    | 7.14    | 0       | 0       | 0.04    | 5.94   | 0       | 0       | 0.04    |
| 2-3.c52817/1/5822                                 | --                              | --        | --          | 0      | 25.79   | 0       | 0.08    | 0       | 0       | 0       | 0       | 23.33  | 31.19   | 22.49   | 0       |
| 1-2.c44470/1/1816                                 | PREDICTED: polyadenylate-       | 847099772 | XP_01281235 | 37.02  | 18.26   | 26.85   | 31.65   | 21.65   | 54.25   | 32.99   | 44.29   | 27.92  | 7.49    | 10.44   | 3.1     |
| 1-2.c26092/2/1884                                 | uncharacterized protein LOC     | 182765469 | NP_00111683 | 0      | 2.48    | 0       | 0       | 2.38    | 2.8     | 0       | 0       | 0      | 0       | 0       | 0       |
| 3-6.c18863/7/2944                                 | eukaryotic translation initiat  | 148232020 | NP_00108075 | 77.31  | 133.31  | 38.54   | 48.59   | 56.48   | 93.34   | 47.47   | 41.55   | 45.16  | 6.16    | 0.17    | 27.09   |

|                     |                                  |           |             |       |        |        |       |        |        |       |       |        |       |        |       |
|---------------------|----------------------------------|-----------|-------------|-------|--------|--------|-------|--------|--------|-------|-------|--------|-------|--------|-------|
| 1-2.c22005/2/1452   | PREDICTED: interferon regu       | 847127915 | XP_01281852 | 4.34  | 0      | 0.11   | 1.98  | 0.01   | 1.8    | 7.31  | 2.39  | 5.53   | 22.31 | 36.63  | 25.5  |
| 2-3.c5438/1/2150.2  | --                               | --        | --          | 0     | 55.1   | 2.67   | 0     | 18.12  | 16.01  | 0     | 0     | 0      | 0     | 0      | 0     |
| 1-2.c8924/1/1459    | PREDICTED: adenosine kin         | 874462866 | XP_01295145 | 6.35  | 14.12  | 14.62  | 8.18  | 5.89   | 7.57   | 2.11  | 1.8   | 2.47   | 0     | 0      | 2.04  |
| 2-3.c26102/1/2052   | --                               | --        | --          | 4     | 0.61   | 2.9    | 2.81  | 6.43   | 4.47   | 1.33  | 1.59  | 14.16  | 0.29  | 0.95   | 0.14  |
| 2-3.c41114/1/2024.1 | --                               | --        | --          | 0     | 0      | 0      | 0     | 0      | 0      | 1.79  | 0     | 1.9    | 3.66  | 22.3   | 8.34  |
| 2-3.c56643/1/2338   | reverse transcriptase, partial [ | 347227    | AAA49027.1  | 0.83  | 45.13  | 0      | 0     | 1.28   | 3.66   | 4.23  | 0.77  | 0.05   | 44.41 | 69.13  | 19.34 |
| 2-3.c777/43/2538    | succinate dehydrogenase [ubi     | 148237169 | NP_00108347 | 44.19 | 9.38   | 53.92  | 65.56 | 71.12  | 31.23  | 20.28 | 22.06 | 70.84  | 20.6  | 4.55   | 9.35  |
| 3-6.c4687/1/6482    | --                               | --        | --          | 1.46  | 52.84  | 3.73   | 1.82  | 3.14   | 6.13   | 0.83  | 1.81  | 2.77   | 0.26  | 0.42   | 0.64  |
| 2-3.c22148/1/1883   | --                               | --        | --          | 0     | 0      | 0      | 0     | 0      | 0      | 1.57  | 0     | 0      | 10.73 | 7.73   | 0     |
| 2-3.c42309/1/2269   | PREDICTED: zinc transporte       | 301618652 | XP_00293871 | 0     | 0      | 0.38   | 0     | 2.66   | 2.65   | 0     | 0     | 0.6    | 0     | 0      | 0     |
| 3-6.c5530/1/2861    | PREDICTED: myosin-4 [Xer         | 847156920 | XP_01282446 | 73.67 | 32.18  | 38.63  | 15.45 | 26.29  | 4.97   | 18.7  | 35.12 | 13.14  | 0.56  | 2.24   | 0.39  |
| 1-2.c42918/2/1803   | PREDICTED: sorting nexin-        | 704154961 | XP_0101301C | 0     | 0      | 0      | 0     | 0      | 0      | 1.26  | 0     | 0      | 6.47  | 5.84   | 0     |
| 2-3.c56018/1/2335   | microtubule-associated protei    | 148232096 | NP_00108054 | 1.53  | 0      | 0.03   | 1.67  | 1.67   | 0      | 1.99  | 6.24  | 2.01   | 35.26 | 54.3   | 14.64 |
| 2-3.c53963/1/2408   | PREDICTED: rho GTPase-ac         | 512868524 | XP_00491805 | 0     | 0      | 0      | 0     | 0      | 0      | 0     | 0     | 0      | 7.2   | 7.78   | 0     |
| 2-3.c36466/1/2194   | uncharacterized protein LOC      | 73853872  | NP_00102751 | 22.07 | 11.75  | 9.88   | 8.6   | 12.21  | 3.45   | 3.59  | 5.62  | 5.04   | 0     | 4.22   | 0     |
| 2-3.c4691/1/2170    | LOC398524 protein [Xenopu        | 169642411 | AAI60682.1  | 0     | 2.86   | 0      | 2.38  | 0      | 2.28   | 1.56  | 0     | 0      | 0     | 0      | 0     |
| 2-3.c58988/1/2501.1 | --                               | --        | --          | 5.2   | 1.04   | 1.36   | 1.08  | 1.65   | 1.25   | 15.95 | 3.06  | 0.77   | 33.55 | 53.42  | 18.23 |
| 1-2.c11573/2/1220   | --                               | --        | --          | 0     | 4.48   | 0      | 2.99  | 1.62   | 1.44   | 3.93  | 0.77  | 2.27   | 51.04 | 36.97  | 40.06 |
| 1-2.c25420/2/1700   | tetranectin precursor [Xenopu    | 58332698  | NP_00101142 | 5.8   | 3.17   | 9.41   | 4.61  | 14.31  | 5.58   | 7.62  | 0     | 6.08   | 0.5   | 0.17   | 0.85  |
| 1-2.c3082/5/1609    | nucleosome assembly protein      | 118404866 | NP_0010729C | 11.44 | 32.34  | 7.26   | 5.37  | 3.18   | 26.72  | 3.86  | 4.22  | 3.85   | 0     | 0      | 0     |
| 1-2.c50141/1/1411   | ubiquinol-cytochrome c red       | 147902934 | NP_00107971 | 0     | 0      | 0      | 0     | 0      | 0      | 0     | 0     | 0      | 50.65 | 143.48 | 0     |
| 3-6.c5030/1/4113    | PREDICTED: serine/threonin       | 591351354 | XP_00707012 | 1.81  | 0.43   | 1.4    | 1.68  | 3.11   | 0      | 1.29  | 0.86  | 0      | 0     | 0      | 0     |
| 1-2.c3127/1/1441    | --                               | --        | --          | 0.31  | 1.99   | 3.1    | 0     | 0      | 0      | 0     | 0     | 0      | 34.03 | 85.45  | 0     |
| 2-3.c23026/1/2322   | --                               | --        | --          | 0.7   | 0.66   | 0.31   | 0.63  | 0.93   | 1.48   | 4.86  | 0.5   | 0      | 0     | 0      | 0     |
| 2-3.c63590/1/2160   | PREDICTED: beta-enolase [        | 637381761 | XP_00812393 | 2.52  | 0      | 7.11   | 9.61  | 6.81   | 2.59   | 5.9   | 4.23  | 14.7   | 1.34  | 0.77   | 0.63  |
| 1-2.c45861/1/1508   | PREDICTED: protein CDV3          | 847134819 | XP_01281997 | 5.98  | 14.81  | 3.52   | 2.91  | 4.43   | 5.15   | 1.99  | 3.92  | 4.14   | 0.86  | 0      | 0     |
| 1-2.c44134/1/1563   | tissue factor pathway inhibito   | 62751741  | NP_00101576 | 0     | 14.29  | 2.38   | 0     | 6.05   | 4.66   | 0     | 0     | 0      | 0     | 0      | 0     |
| 1-2.c29985/1/1566   | PREDICTED: tropomyosin a         | 847143250 | XP_01282187 | 1.07  | 53.08  | 0      | 0     | 3.06   | 7.8    | 4.71  | 0     | 0      | 82.53 | 62.22  | 46.54 |
| 1-2.c2586/6/1298    | actin, alpha cardiac muscle 2    | 45361557  | NP_989355.1 | 2.77  | 0      | 9.71   | 14.12 | 4.84   | 7.32   | 7.42  | 9.73  | 3.42   | 1.54  | 0.2    | 1.27  |
| 2-3.c32812/1/2039   | far upstream element-binding     | 148232337 | NP_00109083 | 0.94  | 15.67  | 3.56   | 8.02  | 4.52   | 5.51   | 0     | 0     | 9.48   | 2.41  | 0      | 0     |
| 3-6.c10528/1/3030   | PREDICTED: cytoplasmic Fl        | 512821479 | XP_00491186 | 2.74  | 10.69  | 2.64   | 2.29  | 5.3    | 3.39   | 1.96  | 3.26  | 0      | 0     | 0.51   | 0.83  |
| 1-2.c24551/1/1340   | PREDICTED: ubiquitin carb        | 847119228 | XP_01281688 | 1.78  | 5.03   | 1.06   | 0     | 0      | 1.85   | 4.62  | 2.04  | 1.51   | 20.5  | 22.87  | 6.47  |
| 2-3.c55982/2/2655   | --                               | --        | --          | 0     | 0      | 40.01  | 9.66  | 42.45  | 14.76  | 16.73 | 28.36 | 13.2   | 1.62  | 0      | 0     |
| 1-2.c42392/3/1731   | PREDICTED: aspartate--trN        | 847163066 | XP_01282572 | 0     | 0      | 0      | 0     | 0      | 0      | 0     | 0     | 0      | 0     | 6.23   | 5.95  |
| 2-3.c59034/1/2311   | --                               | --        | --          | 0.67  | 0      | 0      | 0     | 0      | 0      | 2.77  | 0     | 1.93   | 13.47 | 0      | 9.69  |
| 1-2.c38137/1/1569   | high density lipoprotein bindi   | 160420251 | NP_00108016 | 78.44 | 93.35  | 114.21 | 74.99 | 93.96  | 68.54  | 60.9  | 72.64 | 80.12  | 9.4   | 3.57   | 31.55 |
| 3-6.c11062/1/2776   | --                               | --        | --          | 4.36  | 131.09 | 9.09   | 4.86  | 4.46   | 15.47  | 2.95  | 3.45  | 7.8    | 0.44  | 0.19   | 0.74  |
| 1-2.c11764/1/1710   | PREDICTED: filamin-A-inte        | 301613504 | XP_00293624 | 8.5   | 10.21  | 3.95   | 1.74  | 3.35   | 9.61   | 1.17  | 0.59  | 6.95   | 0     | 0.24   | 0.1   |
| 2-3.c12144/2/2509   | PREDICTED: protein prune 1       | 847161780 | XP_01282533 | 4.04  | 6.94   | 4.76   | 7.05  | 4.05   | 11.72  | 2.04  | 3.27  | 5.48   | 1.72  | 0.64   | 1.04  |
| 1-2.c4839/8/1710    | PREDICTED: protein PFC07         | 556961274 | XP_00599098 | 33.34 | 29.64  | 90.31  | 57.22 | 124.33 | 378.14 | 68.19 | 53.54 | 148.03 | 1.24  | 5.61   | 2.86  |
| 2-3.c25673/1/1889   | --                               | --        | --          | 2.16  | 2.36   | 4.11   | 1.09  | 3.34   | 3.46   | 0.88  | 0.47  | 4.8    | 0     | 0.49   | 0     |
| 2-3.c3027/2/2604    | transmembrane protein 65 [X      | 187607455 | NP_00112036 | 4.29  | 0      | 0.77   | 2.97  | 1.96   | 0      | 1.96  | 1.88  | 4.92   | 0     | 0      | 0     |
| 2-3.c6634/8/2301    | calsequestrin 1 (fast-twitch, s  | 148231736 | NP_00108022 | 5.9   | 0.58   | 10.28  | 8.2   | 10.1   | 8.65   | 6.06  | 8.34  | 9      | 0.52  | 1.2    | 2.43  |
| 1-2.c32951/1/1200.1 | --                               | --        | --          | 9.25  | 8.26   | 14.83  | 43.49 | 18.95  | 17.06  | 24.75 | 9.23  | 24.03  | 1.44  | 3.04   | 4.41  |
| 1-2.c8423/1/1407    | --                               | --        | --          | 0     | 0      | 0      | 0     | 0      | 0      | 0     | 0     | 0      | 12.19 | 8.58   | 0     |
| 2-3.c3280/1/2453    | eukaryotic translation initiati  | 156717262 | NP_00109617 | 49.78 | 69.06  | 29.08  | 24.16 | 26.1   | 25.63  | 19.72 | 19.59 | 15.01  | 3.04  | 0      | 10.25 |
| 2-3.c37041/1/1972   | PREDICTED: constitutive co       | 564265499 | XP_00627158 | 3.93  | 22.56  | 4.22   | 4.29  | 8.47   | 11.1   | 3.54  | 4.28  | 4.18   | 0     | 0.69   | 2.42  |
| 3-6.c6910/3/4151    | paxillin [Xenopus (Silurana)]    | 213983203 | NP_0011355C | 2.75  | 6.65   | 4.55   | 2.57  | 4.57   | 4.49   | 1.72  | 1.69  | 1.38   | 1.29  | 0.19   | 0.29  |
| 3-6.c8001/2/2753    | Unknown (protein for IMAG        | 197246230 | AAI68800.1  | 9.34  | 0      | 10.09  | 4.07  | 4.45   | 1.19   | 2.95  | 3.87  | 12.52  | 0     | 1.35   | 0     |
| 1-2.c1895/41/1826   | hedgehog acyltransferase-like    | 147901798 | NP_00107945 | 90.89 | 0      | 17.08  | 91.54 | 104.67 | 48.1   | 28.27 | 15.73 | 39.68  | 8.86  | 17.25  | 24.7  |
| 1-2.c13325/2/1764   | tetranectin precursor [Xenopu    | 58332698  | NP_00101142 | 13.76 | 0      | 8.28   | 8.55  | 6.12   | 1.72   | 4.52  | 9.81  | 14.43  | 1.31  | 0      | 0     |
| 2-3.c45406/2/2534   | PREDICTED: ATP-binding c         | 512830490 | XP_00491305 | 2.7   | 0.88   | 0.47   | 2.19  | 1.15   | 0.27   | 0.68  | 0.9   | 0.5    | 24.93 | 22.83  | 24.32 |
| 1-2.c17270/1/1413   | Three prime repair exonuclea     | 226372920 | ACO52085.1  | 20.33 | 0.69   | 4.56   | 1.34  | 2.26   | 1.59   | 67.65 | 8.63  | 1.69   | 65.47 | 40.31  | 32.68 |
| 2-3.c42924/1/1876   | primase, polypeptide 1, 49kD     | 89267400  | CAJ82378.1  | 0.29  | 9.33   | 1.03   | 0.88  | 2.79   | 3.77   | 0.22  | 0.44  | 1.32   | 0     | 0      | 0.29  |
| 3-6.c6086/1/4223    | angiotensin-converting enzym     | 183986763 | NP_00111688 | 0.52  | 0.62   | 0.31   | 0.56  | 0.53   | 0.45   | 0.07  | 0.53  | 0.51   | 0     | 0      | 0     |
| 2-3.c59102/1/2341   | --                               | --        | --          | 0.84  | 4.2    | 0.38   | 0.74  | 1.28   | 2.89   | 0.63  | 0.62  | 0      | 0.18  | 0      | 0     |
| 3-6.c15508/1/6944   | RecName: Full=Sodium/pota        | 30923213  | P30714.2    | 22.11 | 22.82  | 24.26  | 12.17 | 29.38  | 11.82  | 4.82  | 2.38  | 8.67   | 2.94  | 0.51   | 3.65  |
| 2-3.c24498/3/2053   | PREDICTED: ubiquitin-like        | 736263084 | XP_01079036 | 0.04  | 0      | 0      | 0     | 0      | 0      | 1.21  | 0     | 0.49   | 8.81  | 5.78   | 0     |

|                    |                                 |           |             |         |         |         |         |         |        |         |         |         |          |          |          |
|--------------------|---------------------------------|-----------|-------------|---------|---------|---------|---------|---------|--------|---------|---------|---------|----------|----------|----------|
| 2-3.c7423/2/2264.1 | ferritin H [Bufo gargarizans]   | 89515094  | ABD75379.1  | 3584.05 | 640.21  | 1203.45 | 3661.76 | 2630.3  | 360.13 | 5154.6  | 2371.11 | 3497.09 | 32708.02 | 57229.96 | 25622.39 |
| 2-3.e15845/1/1839  | --                              | --        | --          | 28.59   | 84.19   | 49.28   | 46.51   | 33.18   | 53.14  | 29.57   | 24.79   | 41.89   | 9.24     | 4.1      | 10.15    |
| 2-3.e23963/1/7119. | Plaa protein [Xenopus laevis]   | 68534804  | AAH98975.1  | 0.69    | 1.12    | 0       | 1.38    | 0.53    | 2.14   | 8.17    | 7.51    | 3.31    | 42.6     | 23.91    | 19.84    |
| 2-3.c33369/1/1927  | PREDICTED: flotillin-2 isofo    | 847099593 | XP_01281225 | 0       | 2.66    | 0.02    | 0       | 0       | 0      | 0       | 0       | 6.62    | 12.32    | 1.03     | 6.2      |
| 2-3.e5782/1/2440   | cytochrome c oxidase subunit    | 146149044 | YP_00116544 | 381.05  | 1271.43 | 505.59  | 940.11  | 154.92  | 1081.7 | 248.48  | 11.09   | 516.15  | 66.32    | 38.01    | 57.66    |
| 2-3.c60447/1/2136  | mitochondrial import recepto    | 156717970 | NP_00109652 | 16.34   | 15.28   | 9.6     | 5.12    | 15.24   | 17.96  | 7.95    | 14.95   | 7.84    | 0        | 1.26     | 4.69     |
| 2-3.c35209/1/2283  | --                              | --        | --          | 14.75   | 7.83    | 8.45    | 8.84    | 9.13    | 3.19   | 10.53   | 4.31    | 12.98   | 0.36     | 1.79     | 0.42     |
| 2-3.e5979/1/2279   | NADH dehydrogenase subun        | 146149047 | YP_00116545 | 11.88   | 32.9    | 22.04   | 13.76   | 19.47   | 19.94  | 11.45   | 16.47   | 18.09   | 1.76     | 1.35     | 6.07     |
| 1-2.c7693/5/1490.1 | --                              | --        | --          | 1105.12 | 1554.67 | 1861.27 | 1259.44 | 1440.65 | 107.25 | 1857.63 | 1219.12 | 1274.41 | 76.12    | 14.55    | 10.99    |
| 2-3.c58473/84/2353 | ATP-binding cassette sub-fan    | 676264017 | KFO20588.1  | 25.71   | 57.33   | 16.95   | 15.36   | 18.16   | 43.41  | 19.02   | 14.93   | 11.55   | 4.31     | 0        | 8.54     |
| 3-6.e13633/1/7136  | LIM domain-binding protein      | 45360839  | NP_989095.1 | 3.3     | 4.82    | 12.68   | 16.11   | 17.9    | 23.38  | 19.22   | 8.12    | 18.92   | 2.93     | 1.67     | 6.05     |
| 1-2.c23432/2/1509  | PREDICTED: cyclin-depend        | 847153765 | XP_01282364 | 28.54   | 0       | 9.58    | 0       | 2.87    | 3.8    | 3.83    | 8.48    | 11.59   | 0        | 0        | 0        |
| 2-3.c41062/1/1984  | --                              | --        | --          | 2.43    | 1.14    | 5.28    | 1.91    | 4.29    | 7.32   | 1.19    | 0.95    | 1.15    | 0.18     | 0.25     | 0.89     |
| 2-3.e10632/2/1897  | pyruvate kinase PKM isoform     | 118405080 | NP_00107253 | 43.28   | 0       | 47.41   | 58.94   | 50.03   | 24.91  | 72.52   | 65.13   | 55.84   | 0        | 0        | 23.89    |
| 1-2.e18813/9/1438  | replication factor C (activator | 148233376 | NP_00108067 | 4.6     | 18.01   | 1.25    | 1       | 6.62    | 2.27   | 0.59    | 1.89    | 0       | 0        | 0        | 0        |
| 2-3.e5103/1/2515   | PREDICTED: MBT domain-          | 641798037 | XP_00816220 | 2.95    | 1.56    | 0.78    | 1.04    | 1.24    | 0.36   | 2.2     | 0       | 2.01    | 0        | 0        | 0        |
| 2-3.e1183/85/2296  | pescadillo homolog [Xenopus     | 148236909 | NP_00108055 | 15.69   | 29.59   | 7.36    | 3.7     | 6.76    | 19.16  | 4.64    | 7.68    | 5.54    | 0.1      | 0.58     | 0.35     |
| 2-3.c53621/1/2597  | PREDICTED: aminopeptidas        | 847168456 | XP_01280803 | 0       | 0       | 0.81    | 0       | 0       | 0      | 0       | 1.16    | 0.74    | 3.12     | 0        | 3.8      |
| 1-2.c13203/1/1389  | PREDICTED: 40S ribosomal        | 109104395 | XP_00109708 | 102.3   | 38.69   | 72.15   | 63.74   | 58.16   | 117.49 | 82.58   | 73.99   | 17.68   | 9.92     | 9.46     | 19.25    |
| 2-3.e14999/1/2012  | histone-lysine N-methyltransl   | 148229543 | NP_00108865 | 0.86    | 0       | 0       | 0       | 0       | 0.02   | 1.45    | 0.39    | 0.94    | 2.31     | 2.98     | 1.71     |
| 2-3.e1881/16/1855  | PREDICTED: T-complex prc        | 530627264 | XP_00530314 | 57.64   | 79.84   | 40.07   | 28.47   | 44.37   | 104.79 | 40.54   | 51.22   | 27.22   | 8.3      | 3.57     | 7.81     |
| 2-3.c35445/3/2106. | PREDICTED: E3 ubiquitin/l       | 847172880 | XP_01280964 | 59.75   | 2.48    | 45.42   | 60.15   | 58.3    | 34.5   | 31.58   | 44.98   | 59.13   | 9.5      | 8.54     | 10.08    |
| 2-3.e25574/1/2351  | PREDICTED: nuclear pore c       | 525010339 | XP_00505275 | 0       | 0       | 0       | 0       | 0       | 0      | 1.62    | 0       | 2.55    | 4.94     | 9.86     | 0.49     |
| 2-3.e59173/1/2212  | PREDICTED: carnosine synt       | 847171322 | XP_00491926 | 4.95    | 4.16    | 6.81    | 3.69    | 5.99    | 11.68  | 2.99    | 3.38    | 4.85    | 1.03     | 0.8      | 1.03     |
| 3-6.e10153/1/3016  | PREDICTED: myosin-3 [Xet        | 847172863 | XP_01280963 | 2.45    | 8.62    | 3.33    | 3.32    | 0.67    | 11.84  | 1.49    | 2.75    | 1.69    | 0        | 0        | 0        |
| 2-3.e58330/29/2046 | PREDICTED: cell division c      | 301604583 | XP_00293192 | 0.46    | 8.72    | 0.57    | 0.41    | 1.23    | 2.95   | 0.08    | 0.37    | 0.77    | 0.06     | 0        | 0        |
| 2-3.e40516/1/2183  | --                              | --        | --          | 4.68    | 0       | 6.4     | 2.48    | 5.46    | 8.92   | 3.22    | 0       | 0       | 0.17     | 0.25     | 1.52     |
| 1-2.c42098/4/1367  | V-type proton ATPase 16 kD      | 45360509  | NP_988893.1 | 0       | 0       | 0       | 0       | 0       | 0      | 0       | 0       | 4.77    | 0        | 85.48    | 35.81    |
| 1-2.e38888/1/1502  | --                              | --        | --          | 2.1     | 24.01   | 5.13    | 3.97    | 26.44   | 5.72   | 3.13    | 3.64    | 156.35  | 221.72   | 218.47   |          |
| 1-2.e11100/2/1313  | PREDICTED: double-strand        | 847135111 | XP_01282007 | 24.64   | 34.71   | 25.19   | 12.17   | 25.55   | 28.62  | 10.38   | 7.55    | 21.56   | 5.14     | 0        | 5.54     |
| 1-2.c14922/2/1369  | selenide, water dikinase 2 [X   | 373432635 | NP_00107285 | 0       | 0       | 0       | 0       | 0       | 0      | 0       | 0       | 0       | 11.15    | 8.18     | 0        |
| 1-2.e52182/4/1402  | GDP-mannose 4,6-dehydrata       | 147899928 | NP_00108035 | 0       | 7.88    | 0       | 0       | 0       | 0      | 2.51    | 0       | 0       | 0        | 7.84     | 7.77     |
| 2-3.c3561/2/2310   | PREDICTED: coiled-coil dor      | 573895397 | XP_00663544 | 0       | 1.5     | 0       | 0       | 0       | 0      | 0.06    | 0.12    | 2.1     | 2.89     | 0.89     | 2.57     |
| 1-2.c11602/1/1382  | RNA polymerase-associated j     | 147900849 | NP_00108528 | 0.12    | 22.79   | 0       | 0       | 0       | 0      | 0       | 5.67    | 3.92    | 10.79    | 15.61    | 0        |
| 1-2.e3637/1/1620.1 | PREDICTED: adenylate kina       | 847099206 | XP_01281215 | 31.3    | 31.11   | 34.87   | 37.32   | 29.46   | 43.52  | 19.64   | 29.7    | 26.1    | 5.66     | 2.35     | 10.8     |
| 2-3.c18320/15/2610 | DNA replication licensing fac   | 148232250 | NP_00108146 | 6.14    | 63.38   | 4.05    | 3.47    | 8.42    | 13.32  | 1.29    | 2.41    | 5.13    | 1.01     | 0        | 2.65     |
| 2-3.c42231/1/2616  | PREDICTED: uncharacterize       | 847139520 | XP_01282096 | 0       | 0.67    | 0       | 0       | 0       | 0      | 0       | 0       | 2.67    | 2.55     | 1.2      | 1.39     |
| 2-3.e57515/3/2301  | endothelin converting enzym     | 132424622 | ABO33468.1  | 0       | 9.5     | 1.92    | 0       | 0       | 3.9    | 7.61    | 5       | 4.99    | 11.18    | 19.78    | 35.42    |
| 2-3.e8864/1/2049   | PREDICTED: transmembran         | 512852461 | XP_00293601 | 0.17    | 0       | 0       | 0       | 0       | 0.97   | 2.61    | 0       | 2.34    | 10.62    | 9        | 6.72     |
| 3-6.c19091/8/3352  | myosin, heavy chain 4, skelet   | 47575800  | NP_00100124 | 0.92    | 0.53    | 19.25   | 12.84   | 9.92    | 0.09   | 19.56   | 6.9     | 9.14    | 0.1      | 0.13     | 0.1      |
| 1-2.c6523/1/1653   | 3-hydroxyisobutyrate dehydr     | 147898679 | NP_00108475 | 10.99   | 5.71    | 7.42    | 11.79   | 7.92    | 2.83   | 10.52   | 9.06    | 6.4     | 0.55     | 1.99     | 0.28     |
| 2-3.e27177/2/2165  | --                              | --        | --          | 8.06    | 13.03   | 6.75    | 7.41    | 6.01    | 0      | 2.64    | 3.81    | 2.82    | 0        | 0        | 0        |
| 1-2.c46586/2/1608  | PREDICTED: dimethyladenc        | 512842699 | XP_00491468 | 2.43    | 1.77    | 1.08    | 2.06    | 4.09    | 2.06   | 0.38    | 0.28    | 2       | 0.42     | 0        | 0        |
| 1-2.e29298/1/1769  | deoxynucleotidyltransferase,    | 148227738 | NP_00108535 | 0       | 10.57   | 1.93    | 0       | 0       | 0      | 3.56    | 0       | 0       | 15.58    | 10.14    | 0        |
| 1-2.c43301/1/1666  | Mark2-prov protein [Xenopus     | 27694575  | AAH43730.1  | 0       | 0       | 0       | 0       | 0       | 0      | 0       | 0       | 0       | 5.91     | 0        | 5.44     |
| 1-2.c47084/1/1454  | --                              | --        | --          | 0       | 4.38    | 0       | 0.19    | 0       | 0      | 0       | 0.17    | 0.42    | 2.61     | 10.06    | 4.52     |
| 2-3.c47041/1/2434  | PREDICTED: collagen alpha       | 512859351 | XP_00491692 | 1.79    | 4.82    | 3.04    | 2.91    | 3.57    | 2.72   | 1.6     | 1.49    | 2.1     | 0.46     | 0.18     | 0.29     |
| 2-3.e54978/1/2225  | Mimitin, mitochondrial precu    | 226372810 | ACO52030.1  | 0       | 0       | 0       | 0.55    | 1.64    | 0.94   | 1.04    | 0       | 0       | 0        | 0        | 0        |
| 3-6.c3318/4/3339   | H(+)/Cl(-) exchange transpor    | 113931518 | NP_00103921 | 0.63    | 0.98    | 0       | 1.19    | 1.66    | 0      | 0       | 0       | 0       | 0        | 0        | 0        |
| 1-2.c49523/1/1370  | hypothetical protein T265_11    | 684410742 | XP_00917617 | 38.4    | 14.79   | 1.52    | 2.16    | 2.27    | 5.34   | 44.01   | 24.03   | 3.19    | 54.21    | 63.9     | 64.9     |
| 3-6.e2748/6/2872.1 | transmembrane BAX inhibito      | 147899637 | NP_00108928 | 3.3     | 0       | 3.32    | 3.45    | 5.54    | 1.36   | 1.2     | 3.95    | 0       | 0        | 0        | 0.67     |
| 2-3.c41116/1/2724  | uncharacterized protein LOC     | 147905311 | NP_00109060 | 0.13    | 0       | 0.36    | 1.06    | 0.51    | 1.08   | 2.35    | 0.16    | 0.47    | 20.36    | 17.85    | 36.36    |
| 2-3.c40646/2/2051  | --                              | --        | --          | 0.46    | 3.43    | 0.16    | 0       | 0       | 0      | 2.85    | 0       | 0       | 0.13     | 3.34     | 3.36     |
| 1-2.c44486/1/1589  | --                              | --        | --          | 2.48    | 5.88    | 5.62    | 2.92    | 2.8     | 7.46   | 2.2     | 2.66    | 3.36    | 0.33     | 0.22     | 0.45     |
| 3-6.c4119/2/3033.1 | RecName: Full=Heat shock p      | 338817950 | P30946.2    | 0       | 0       | 0       | 0       | 0       | 0      | 4.57    | 0.07    | 0.97    | 19.41    | 14.56    | 0        |
| 1-2.c32116/2/1616  | beta tubulin, partial [Chionod  | 10242188  | AAG15329.1  | 0       | 0       | 0.09    | 0       | 0       | 0      | 0       | 0       | 2.33    | 10.69    | 33.62    | 3.13     |
| 2-3.c35184/1/2025  | PREDICTED: LOW QUALI            | 641766329 | XP_00816801 | 0       | 0       | 0       | 0       | 0       | 0      | 0       | 2.14    | 0       | 8        | 14.9     | 0.13     |
| 2-3.c56290/2/2399  | --                              | --        | --          | 1.92    | 0       | 0       | 0       | 0       | 0      | 0       | 0       | 0       | 0        | 3.41     | 3.9      |

|                     |                                 |           |             |         |         |         |         |         |         |         |         |         |        |        |        |
|---------------------|---------------------------------|-----------|-------------|---------|---------|---------|---------|---------|---------|---------|---------|---------|--------|--------|--------|
| 1-2.c1065/49/1485   | PREDICTED: voltage-depen        | 530564480 | XP_00527881 | 1980.39 | 1043.21 | 1596.03 | 1422.44 | 1606.6  | 1050.15 | 1138.03 | 1188.2  | 1366.66 | 322.74 | 205.69 | 363.86 |
| 1-2.e19102/2/1399   | --                              | --        | --          | 9.32    | 0       | 7.36    | 6.92    | 0.56    | 1.87    | 10.65   | 6.88    | 5.14    | 48.68  | 76.11  | 52.82  |
| 1-2.e27694/1/4507   | PREDICTED: cytoplasmic d        | 637327354 | XP_00811396 | 0       | 1.6     | 0.43    | 0       | 0       | 0       | 0       | 0.87    | 2.25    | 9.47   | 3.4    | 1.26   |
| 2-3.c59258/1/2379   | PREDICTED: glutathione S-i      | 558227591 | XP_00613781 | 20.93   | 65.94   | 32.29   | 26.48   | 16.4    | 66.52   | 30.58   | 27.35   | 31.08   | 4.22   | 1.98   | 2.63   |
| 1-2.e31183/1/1459   | --                              | --        | --          | 2.32    | 0.7     | 1.34    | 2.61    | 1.82    | 0.98    | 0.96    | 2.1     | 3.23    | 42.02  | 36.8   | 32.44  |
| 2-3.c8644/1/2308.2  | --                              | --        | --          | 111.73  | 62.7    | 101     | 113.46  | 76.18   | 3.46    | 9.78    | 88.85   | 59.21   | 1.04   | 0      | 1.62   |
| 2-3.c9334/8/2414    | RNA-binding protein 28 [Xei     | 194018610 | NP_00112335 | 1.19    | 0.47    | 1.05    | 0.98    | 0.98    | 3.15    | 1.01    | 0.58    | 0.81    | 0.2    | 0      | 0      |
| 1-2.c43254/1/1302   | PREDICTED: immunoglobul         | 847130950 | XP_01281911 | 1.75    | 4.17    | 0.56    | 4.17    | 3.17    | 6.13    | 0.82    | 4.23    | 4.6     | 0.18   | 0.19   | 0.39   |
| 1-2.c48648/1/1246   | PREDICTED: enoyl-CoA hy         | 432903775 | XP_00407722 | 20.11   | 60.15   | 21.46   | 27.43   | 34.95   | 78.55   | 24.65   | 29.56   | 25.82   | 10.12  | 9.23   | 7.53   |
| 2-3.c23376/1/2651   | synaptotagmin 2 binding protei  | 148232060 | NP_00108525 | 0       | 0       | 1.22    | 0       | 0       | 0       | 0       | 0       | 0       | 3.55   | 3.5    | 0      |
| 2-3.c52467/1/2029   | PREDICTED: tropomyosin-2        | 755867989 | XP_01129150 | 1.34    | 0.59    | 0       | 0       | 0.4     | 0.12    | 0       | 0.69    | 0.42    | 9.85   | 8.06   | 2.73   |
| 1-2.c19814/6/1816   | PREDICTED: monocarboxyl         | 704293877 | XP_01016065 | 29.99   | 0.82    | 28.7    | 82.7    | 87.2    | 9.59    | 27.34   | 35.66   | 61.29   | 3.58   | 3.33   | 2.49   |
| 1-2.c4650/1/1476    | RecName: Full=Cyclin-A2 [P      | 1345741   | P47827.1    | 0.81    | 37.45   | 0.53    | 0.66    | 2.49    | 7.26    | 0       | 1.17    | 1.79    | 0      | 0      | 0      |
| 1-2.c40238/1/1387   | F-box/LRR-repeat protein 15     | 148225152 | NP_00107974 | 0       | 0       | 0       | 0       | 0       | 0       | 0       | 0       | 0       | 3.95   | 5.42   | 2.68   |
| 2-3.c61900/1/2215   | Saf-A protein [Xenopus laevi    | 54311369  | AAH84742.1  | 0       | 0       | 0       | 0       | 6.36    | 3.6     | 0       | 0.17    | 0       | 0      | 0      | 0      |
| 1-2.c19681/3/1296   | LOC494840 protein, partial [    | 52789300  | AAH83011.1  | 0       | 33.79   | 0       | 0.12    | 0       | 0       | 26.78   | 0       | 0       | 71     | 164.75 | 0      |
| 3-6.c9299/1/2983.1  | P2Y purinoceptor 1 [Xenopus     | 156717364 | NP_00109622 | 1.79    | 1.96    | 3.23    | 0.76    | 0.94    | 3.87    | 0       | 0.9     | 1.71    | 0      | 0      | 0      |
| 2-3.c14228/1/2155   | PREDICTED: adenylyl cyclase     | 301606235 | XP_00293272 | 0       | 5.32    | 0       | 0       | 0       | 0       | 9.93    | 0       | 0       | 0      | 3.89   | 5.4    |
| 3-6.c10412/1/4439   | PREDICTED: collagen alpha       | 602636099 | XP_00742490 | 39.92   | 1112.56 | 205.53  | 125.4   | 163.09  | 558.41  | 72.27   | 62.08   | 135.14  | 9.13   | 5.51   | 10.94  |
| 1-2.c8877/1/1726    | collagen, type 1, alpha 2 prec  | 147898763 | NP_00108072 | 0       | 0       | 0       | 0       | 0       | 0       | 0       | 0       | 0       | 0      | 4.82   | 6.24   |
| 1-2.c11992/9/1486   | PREDICTED: 3-hydroxyisob        | 591350996 | XP_00706995 | 4.83    | 17.63   | 5.94    | 4.63    | 5.85    | 14.05   | 3.02    | 4.53    | 5.18    | 1.32   | 0.48   | 1.03   |
| 1-2.c6536/2/1545    | --                              | --        | --          | 21.76   | 1.03    | 19.1    | 0.09    | 0.13    | 0.16    | 0.22    | 0.22    | 27.68   | 36.44  | 0.17   | 37.22  |
| 2-3.c9845/1/2538.1  | PREDICTED: tyrosine-protei      | 847138365 | XP_00491530 | 8.21    | 11.96   | 10.1    | 6.36    | 7.42    | 4.26    | 4.08    | 9.15    | 6.74    | 0      | 0      | 1.38   |
| 2-3.c4307/1/2287    | --                              | --        | --          | 3.83    | 0.17    | 0.32    | 1.6     | 1.38    | 0.41    | 4.98    | 0.58    | 0.84    | 24.41  | 19.96  | 23.98  |
| 2-3.c12470/2/2420.1 | --                              | --        | --          | 0.62    | 0       | 1.08    | 0       | 0       | 0       | 0       | 0       | 0.09    | 7.04   | 3.72   | 1.32   |
| 1-2.c42521/373/138  | secreted protein acidic and ric | 42407294  | BAD10858.1  | 1.17    | 22.75   | 3.9     | 4.33    | 3.62    | 11.45   | 1.83    | 2.03    | 3.02    | 0      | 0      | 1.65   |
| 1-2.c47470/3/1551   | PREDICTED: cytoplasmic d        | 637327354 | XP_00811396 | 14.01   | 22.21   | 5.35    | 2.72    | 0       | 5.34    | 4.73    | 0.1     | 4.62    | 45.36  | 47.22  | 46.48  |
| 1-2.c7903/1/1636    | PREDICTED: LOW QUALI            | 847103725 | XP_01281318 | 1.3     | 2.83    | 2.73    | 1.68    | 2.96    | 1.83    | 1.51    | 2.09    | 2.36    | 0      | 0.19   | 0      |
| 2-3.c42323/3/2552   | --                              | --        | --          | 9.49    | 3.2     | 5.33    | 11.24   | 16.39   | 4.78    | 7.49    | 0.73    | 3.6     | 2.33   | 0      | 2.92   |
| 1-2.c28458/1/1700   | --                              | --        | --          | 1.63    | 11.66   | 0.63    | 2.85    | 1.67    | 6.61    | 2.2     | 2.21    | 2.47    | 55.99  | 75.18  | 56.08  |
| 1-2.c40764/1/1392   | PREDICTED: ankyrin repeat       | 512839176 | XP_00293505 | 38.16   | 1.29    | 6.19    | 17.44   | 19.78   | 0.84    | 10.41   | 30.37   | 20.77   | 0.99   | 0      | 0      |
| 2-3.c40892/1/2313   | PREDICTED: laminin subun        | 512830498 | XP_00293314 | 0       | 0       | 0.78    | 3.63    | 2.19    | 0       | 0       | 0       | 0       | 0      | 0      | 0      |
| 1-2.c25890/1/1686   | PREDICTED: calcium/calme        | 847142006 | XP_01282144 | 8.46    | 5.05    | 4.74    | 10.97   | 9.13    | 13.18   | 5.94    | 2.51    | 5.2     | 0      | 0      | 4.65   |
| 2-3.c36681/1/2213   | MAP/microtubule affinity-req    | 148232710 | NP_00108512 | 0       | 0       | 0       | 0.57    | 1.99    | 6.41    | 0       | 3.89    | 0       | 0      | 0      | 0      |
| 1-2.c41962/4/1387   | actin, alpha cardiac muscle 2   | 45361557  | NP_989355.1 | 8.62    | 0.91    | 8.49    | 10.69   | 14.77   | 14.49   | 12.48   | 7.88    | 10.69   | 2.28   | 1.29   | 2.54   |
| 2-3.c7138/1/2274    | calsequestrin 1 (fast-twitch, s | 148231736 | NP_00108022 | 50.2    | 7.97    | 89.97   | 73.67   | 89.46   | 70.89   | 65.13   | 80.48   | 83.8    | 18.18  | 7.86   | 23     |
| 2-3.c29535/1/1907   | Histone deacetylase 1, partial  | 676771369 | KFP00125.1  | 0       | 0       | 0.77    | 0       | 0       | 0       | 1.66    | 0       | 0.25    | 0.44   | 2.44   | 5.22   |
| 2-3.c8666/1/1939    | PREDICTED: uridine-cytidir      | 611978749 | XP_00747556 | 0.75    | 0       | 7.29    | 3.91    | 2.52    | 0       | 0.31    | 2.6     | 0       | 0      | 0      | 0      |
| 2-3.c30901/1/2306   | phospholipid transfer protein   | 349732136 | NP_00108776 | 21.61   | 32.03   | 19.18   | 11.6    | 4.89    | 17.25   | 10.04   | 16.36   | 14.12   | 177.85 | 269.6  | 119.33 |
| 2-3.c13579/1/7723   | calsequestrin-1 precursor [Xe   | 45360503  | NP_988894.1 | 1301.36 | 143.51  | 2256.45 | 1654.59 | 2049.32 | 1228.35 | 1029.6  | 1723.47 | 1608.55 | 326.96 | 185.64 | 554.3  |
| 2-3.c2427/7/2322    | fragile X mental retardation p  | 147898943 | NP_00108996 | 4.88    | 19.71   | 1.8     | 0.76    | 4.19    | 1.19    | 0.96    | 1.28    | 0       | 0      | 0      | 0      |
| 1-2.c38857/1/1391   | casein kinase 2, alpha prime j  | 148235727 | NP_00108510 | 0       | 0.2     | 0       | 0       | 0       | 1.33    | 5.52    | 0       | 3.68    | 13.84  | 20.34  | 7.54   |
| 1-2.c17036/1/1918   | PREDICTED: vacuolar fusio       | 847163331 | XP_01282580 | 0       | 0       | 0       | 0       | 0       | 0       | 0       | 0       | 0       | 11     | 9.82   | 0      |
| 2-3.c13579/1/7723   | calsequestrin 1 (fast-twitch, s | 148231736 | NP_00108022 | 653.62  | 68.95   | 673.89  | 328.46  | 991.73  | 1086.48 | 752.92  | 963.27  | 836.25  | 181.75 | 125.54 | 206.89 |
| 2-3.c55975/2/2013   | uncharacterized protein LOC     | 148236097 | NP_00108940 | 0.17    | 1.6     | 0       | 0       | 0       | 0       | 0       | 0       | 4.23    | 8.27   | 5.36   | 0      |
| 1-2.c40488/1/1684   | PREDICTED: transmembran         | 634827293 | XP_00795314 | 0       | 0       | 0       | 5.98    | 0       | 0       | 5.81    | 13.25   | 5.19    | 40.09  | 46.34  | 29.02  |
| 1-2.c46373/1/1406   | PREDICTED: DNA polymer          | 847117617 | XP_01281632 | 1.32    | 4.56    | 0.98    | 1.02    | 1.87    | 2.43    | 0       | 0       | 0       | 0      | 0      | 0      |
| 2-3.c25039/8/2243   | novel protein containing thre   | 89269825  | CAJ81625.1  | 0       | 39.22   | 0       | 0       | 1.77    | 2.63    | 0       | 0       | 0       | 0      | 0      | 0      |
| 2-3.c51481/29/2171  | LOC100038258 protein [Xen       | 166796565 | AAI58918.1  | 1.46    | 26.98   | 6.34    | 6.46    | 10.44   | 4.71    | 3.74    | 6.31    | 9.7     | 0.41   | 2.28   | 0.98   |
| 3-6.c13921/1/3620   | LIM domain-binding protein      | 45360839  | NP_989095.1 | 4.79    | 1.41    | 17.11   | 15.31   | 16.88   | 15.96   | 19.32   | 9.95    | 19.65   | 2.91   | 1.15   | 5.23   |
| 1-2.c10270/19/146   | CRAD9 checkpoint clamp com      | 147905155 | NP_00108260 | 13.34   | 26.1    | 11.21   | 9.97    | 12.17   | 16.37   | 11.5    | 12.68   | 7.96    | 2.81   | 3.2    | 0.58   |
| 2-3.c24441/1/2410   | PREDICTED: cyclin-depend        | 847146277 | XP_01282210 | 0       | 1.02    | 0       | 1.66    | 0.6     | 0.41    | 0       | 2.63    | 0.99    | 0      | 0      | 0      |
| 3-6.c8866/1/2769    | MGC84250 protein [Xenopus       | 148225296 | NP_00108790 | 5.97    | 0.47    | 7.21    | 15.61   | 7.88    | 5.91    | 9.18    | 8.98    | 4.51    | 3.01   | 1.35   | 1.23   |
| 3-6.c5830/1/3433.2  | --                              | --        | --          | 1.23    | 14.2    | 0.79    | 3.92    | 1.09    | 5.11    | 14.28   | 1.66    | 2.17    | 41.07  | 62.32  | 88.52  |
| 1-2.c20364/1/1361   | PREDICTED: male-specific 1      | 512874083 | XP_00294026 | 0       | 0.12    | 2.49    | 0       | 0       | 0       | 0       | 4.61    | 3.96    | 7.21   | 0      | 11.53  |
| 1-2.c42490/5/1626   | DBIRD complex subunit ZNI       | 349585177 | NP_00101608 | 0       | 0       | 0       | 0       | 0       | 0       | 7.95    | 0       | 4.92    | 9.93   | 17.7   | 0      |
| 2-3.c21624/1/6482   | PREDICTED: beta-enolase-lj      | 573878367 | XP_00662741 | 1504.65 | 92.24   | 2789.49 | 4552.27 | 3214.19 | 701.47  | 1770.31 | 2150.31 | 3310.83 | 169.96 | 46.71  | 285.75 |
| 2-3.c30755/1/1949   | PREDICTED: protein archea       | 669281586 | XP_00863330 | 1       | 0       | 0       | 0       | 0       | 0.62    | 5.15    | 0       | 0.1     | 13.02  | 3.76   | 5.69   |

|                    |                                 |           |             |        |       |        |         |         |        |        |        |         |        |         |        |
|--------------------|---------------------------------|-----------|-------------|--------|-------|--------|---------|---------|--------|--------|--------|---------|--------|---------|--------|
| 2-3.c63202/3/2163  | folypolyglutamate synthase,     | 156717746 | NP_00109641 | 2.7    | 12.1  | 1.7    | 3.73    | 3.71    | 10.08  | 0.95   | 1.95   | 0.46    | 0.63   | 0.73    | 0.95   |
| 3-6.c4386/1/2742   | --                              | --        | --          | 2.13   | 11.15 | 0.69   | 3.74    | 2.05    | 0.72   | 20.44  | 2.45   | 3.89    | 28.41  | 50.46   | 37.05  |
| 3-6.e10120/1/3260  | PREDICTED: eukaryotic trar      | 847153589 | XP_01282358 | 0.49   | 0.4   | 0.49   | 0.31    | 0.54    | 1.13   | 0.17   | 0.77   | 0.56    | 0      | 0       | 0      |
| 3-6.c13582/1/2762  | PREDICTED: tetratricopeptid     | 512843038 | XP_00293450 | 1.56   | 2.17  | 0.65   | 0.76    | 0.65    | 3.51   | 0.46   | 0.73   | 0.66    | 0      | 0       | 0      |
| 1-2.c3351/1/1682   | novel protein containing thre   | 89269825  | CAJ81625.1  | 0      | 0     | 0      | 0       | 0       | 0      | 0      | 0      | 0       | 9.8    | 17.97   | 0      |
| 1-2.e27670/1/1245  | ER lumen protein-retaining re   | 58332334  | NP_00101104 | 0      | 0     | 0      | 0       | 0       | 0      | 0      | 0      | 0       | 16.6   | 32.49   | 0      |
| 2-3.c21229/1/2070  | PREDICTED: glycogen phos        | 426369041 | XP_00405150 | 0.1    | 3.51  | 13.59  | 11.96   | 93.58   | 51.31  | 18.92  | 112.91 | 67.46   | 0      | 5.72    | 0      |
| 1-2.c43880/1/3449  | PREDICTED: elongation fac       | 573878959 | XP_00662770 | 23.24  | 0     | 0      | 35.91   | 0       | 38.9   | 233.13 | 49.81  | 142.05  | 359.73 | 419.36  | 360.65 |
| 3-6.c13579/1/11992 | --                              | --        | --          | 108.08 | 0     | 4.2    | 88.24   | 63.36   | 2.77   | 108.85 | 80.2   | 70.82   | 785.93 | 1168.66 | 670.46 |
| 1-2.c17033/2/1311  | PREDICTED: protein FAM3         | 612057466 | XP_00750695 | 4.12   | 0     | 0      | 0       | 0       | 0      | 0      | 0      | 0       | 8.76   | 11.79   | 0      |
| 1-2.c44228/1/1880  | PREDICTED: notchless prot       | 530616974 | XP_00529822 | 4.12   | 11.24 | 1.42   | 2.85    | 3.7     | 10.24  | 3.8    | 1.53   | 1.78    | 0.57   | 0.19    | 0.55   |
| 1-2.c25597/1/1369  | PREDICTED: 14-3-3 protein       | 821027291 | XP_01235685 | 0      | 0     | 0      | 0       | 0       | 0      | 0      | 0      | 0       | 18.46  | 39.82   | 0      |
| 2-3.c44477/1/2652  | PREDICTED: myosin-4 [Xen        | 847156920 | XP_01282446 | 1.06   | 0.01  | 24.66  | 15.04   | 11.14   | 0.08   | 27.54  | 12.75  | 13.06   | 0.19   | 0       | 0.15   |
| 2-3.c27237/1/1911  | PREDICTED: 14-3-3 protein       | 821027291 | XP_01235685 | 2.35   | 23.71 | 56.62  | 74.93   | 59.29   | 70.18  | 54.88  | 40.08  | 38.56   | 0      | 16.02   | 26.37  |
| 2-3.c45408/3/2351  | PREDICTED: beta-enolase-li      | 573878367 | XP_00662741 | 0.26   | 0     | 0      | 1.55    | 1.04    | 0.14   | 0.17   | 0      | 1.37    | 0      | 0       | 0      |
| 1-2.c40367/1/1528  | synaptophysin-like protein 2    | 54606873  | NP_00100611 | 66.54  | 69.71 | 142.7  | 82.68   | 129.54  | 397.24 | 99.08  | 114.64 | 118.14  | 10.3   | 2.13    | 9.05   |
| 2-3.c48949/1/2025  | phosphoethanolamine methyl      | 351720746 | NP_00109627 | 0.95   | 1.27  | 1.16   | 0       | 1.95    | 2.08   | 0      | 0.37   | 0       | 0      | 0       | 0      |
| 1-2.c42795/38/1549 | ATP synthase subunit alpha,     | 71896075  | NP_00102561 | 74.43  | 72.95 | 135.83 | 105     | 178.88  | 157    | 121.45 | 71.51  | 161.05  | 31.14  | 46.67   | 24.18  |
| 1-2.c40827/1/1753  | PREDICTED: ADP/ATP trar         | 829867054 | XP_01264035 | 6.95   | 1.58  | 5.75   | 8.3     | 5.37    | 7.39   | 4.5    | 2.51   | 3.46    | 0.6    | 2.07    | 0.49   |
| 2-3.e16307/1/2245  | PREDICTED: integral memb        | 543742020 | XP_00551187 | 1.66   | 0     | 0      | 0.18    | 0       | 0      | 2.41   | 0      | 0       | 45.12  | 86.07   | 0      |
| 1-2.c34319/1/1302  | PREDICTED: uncharacterize       | 658888975 | XP_00842733 | 6.61   | 12.04 | 1.48   | 5.46    | 3.48    | 2.11   | 18.01  | 2.86   | 4.9     | 103.73 | 67.82   | 54.02  |
| 2-3.c49278/1/2455  | --                              | --        | --          | 0      | 44.55 | 0      | 2.75    | 1.96    | 4.16   | 0      | 0      | 0       | 56.9   | 77.15   | 34.09  |
| 3-6.e15160/1/2801  | PREDICTED: cTAGE family         | 847155129 | XP_01282405 | 3.49   | 0     | 1.43   | 2.46    | 2       | 2.08   | 3.76   | 0.65   | 1.4     | 0.59   | 0       | 0      |
| 1-2.c41255/1/1571  | PREDICTED: collagen alpha       | 641767075 | XP_00816827 | 6.52   | 26.23 | 9.38   | 12.36   | 6.91    | 17.55  | 7.46   | 7.05   | 11.05   | 3.09   | 1.18    | 1.59   |
| 2-3.c63596/1/2512  | proteasome activator comple     | 156717318 | NP_00109620 | 0.49   | 2.66  | 0.25   | 0.83    | 0.96    | 0.8    | 0      | 0      | 0       | 0      | 0       | 0      |
| 2-3.c7709/4/2461   | RecName: Full=Myb-related       | 6226654   | P52551.2    | 1.12   | 2.72  | 0.71   | 0.35    | 1.16    | 1.16   | 0.54   | 0.88   | 0.38    | 0      | 0       | 0      |
| 1-2.c49329/1/1659  | --                              | --        | --          | 0.18   | 4.23  | 0.01   | 3.76    | 3.48    | 0      | 22.09  | 3.84   | 0       | 59.95  | 50.17   | 48.54  |
| 1-2.c7569/2/1696   | --                              | --        | --          | 3.29   | 4.46  | 1.35   | 1.07    | 3.03    | 0.62   | 1.26   | 1.02   | 2.43    | 18.5   | 33.06   | 42.52  |
| 1-2.c46152/1/1510  | N-terminal kinase-like protei   | 148225212 | NP_00108530 | 3.5    | 6.34  | 0      | 0       | 0       | 0      | 2.36   | 0.2    | 0.5     | 1.6    | 1.98    | 5.96   |
| 1-2.c19087/1/6532  | LOC100125139 protein [Xen       | 140832681 | AAI35415.1  | 15.36  | 9.82  | 9.73   | 3.98    | 3.4     | 8.01   | 3.46   | 16.84  | 0       | 0      | 0       | 0      |
| 1-2.c10850/1/1728  | LOC100144989 protein [Xen       | 165971120 | AAI58328.1  | 20.1   | 25.34 | 10.24  | 11.14   | 8.88    | 12.93  | 9.28   | 6.48   | 7       | 1.48   | 2.06    | 1.93   |
| 1-2.c17145/1/1938  | PREDICTED: beta-enolase [       | 637381761 | XP_00812393 | 569.1  | 39.38 | 778.55 | 1460.02 | 1042.33 | 298.87 | 976.88 | 965.32 | 1198.82 | 73.98  | 10.34   | 170.13 |
| 3-6.c18211/1/2784  | PREDICTED: collagen alpha       | 556973045 | XP_00599461 | 2.01   | 37.68 | 10.3   | 4.4     | 1.15    | 6.89   | 1.94   | 2.42   | 4.9     | 0      | 0.14    | 0.17   |
| 1-2.c34277/1/3900  | PREDICTED: choline-phospi       | 675418748 | XP_00892276 | 0.42   | 0.4   | 1.05   | 5.91    | 9.09    | 5.63   | 0.42   | 4.57   | 0.71    | 0.47   | 0.56    | 0.9    |
| 1-2.c6546/2/1254.1 | 3-oxo-5-beta-steroid 4-dehyd    | 71896073  | NP_00102560 | 0      | 0.27  | 0      | 0.09    | 4.79    | 8.5    | 0      | 0      | 3.97    | 0      | 0       | 0      |
| 1-2.c1857/19/1873  | SET and MYND domain con         | 148225404 | NP_00108546 | 0      | 0     | 0      | 0       | 21.38   | 84.75  | 0      | 0      | 39.02   | 0      | 0       | 0      |
| 1-2.c7258/17/1550  | succinyl-CoA ligase [ADP-fo     | 45361311  | NP_989233.1 | 10.4   | 0     | 8.3    | 13.58   | 9.17    | 16.36  | 3.5    | 8.96   | 14.06   | 0      | 1.33    | 4.52   |
| 2-3.c21934/1/2107  | PREDICTED: myosin-bindin        | 768914292 | XP_01160075 | 1.82   | 1.26  | 4.64   | 3.55    | 2.44    | 2.2    | 1.51   | 4.51   | 2.92    | 0.35   | 0.41    | 0      |
| 2-3.c2236/16/2034  | ras-related GTP-binding prot    | 820152711 | KKX16856.1  | 0      | 4.7   | 0.32   | 1.2     | 3.49    | 0.5    | 1.2    | 0.85   | 0       | 0      | 0       | 0      |
| 1-2.c20127/3/1727  | periostin precursor [Xenopus    | 163915007 | NP_00110637 | 16.11  | 0     | 39.41  | 16.83   | 11.85   | 6.7    | 8.52   | 11.41  | 26.07   | 0      | 3.92    | 2.52   |
| 2-3.c6306/1/2092   | --                              | --        | --          | 2.1    | 1.63  | 0      | 0.29    | 0       | 0.68   | 0.7    | 2.24   | 0.67    | 7.44   | 10.21   | 7.7    |
| 1-2.c28375/1/1750  | PREDICTED: diacylglycerol       | 301610039 | XP_00293457 | 0      | 4.61  | 3.4    | 2.34    | 2.65    | 1.76   | 1.98   | 2.15   | 0       | 0.28   | 0       | 0      |
| 2-3.c19452/1/2530  | PREDICTED: LOW QUALI            | 641766329 | XP_00816801 | 14.06  | 21.59 | 35.91  | 32.82   | 18.29   | 13.79  | 14.06  | 8.67   | 17.2    | 1.54   | 2.72    | 8.44   |
| 2-3.c49645/1/1859  | PREDICTED: DENN domain          | 847169838 | XP_01280847 | 0.17   | 0     | 0      | 0.95    | 0.16    | 0.2    | 5.54   | 0      | 0       | 52.66  | 64.58   | 278.44 |
| 1-2.c5975/1/3903.3 | PREDICTED: NEDD8-conju          | 847163368 | XP_01282581 | 6.31   | 11.31 | 4.97   | 2.41    | 7.5     | 11.82  | 0.07   | 0      | 5.29    | 0      | 0       | 0      |
| 2-3.c56289/2/2079  | calsequestrin 1 (fast-twitch, s | 148231736 | NP_00108022 | 9.51   | 0.82  | 17.09  | 13.1    | 17.04   | 12.31  | 13.21  | 16.84  | 12.4    | 2.97   | 0.66    | 4.01   |
| 1-2.c48250/1/1363  | Sec23 homolog B (S. cerevisi    | 89266855  | CAJ83841.1  | 2.41   | 0     | 3.97   | 3.14    | 2.69    | 0      | 16.66  | 5.32   | 1.04    | 43.91  | 41.66   | 32.91  |
| 1-2.c7004/2/1535   | --                              | --        | --          | 0      | 0     | 0      | 0       | 0       | 0      | 0      | 0      | 0.39    | 9.88   | 9.66    | 0      |
| 1-2.c13020/1/1405  | ER lumen protein-retaining re   | 45361615  | NP_989381.1 | 0      | 0     | 0      | 1.94    | 0       | 0      | 0      | 2.99   | 0       | 14.87  | 23.64   | 13.06  |
| 2-3.c53509/1/6356  | --                              | --        | --          | 0      | 0     | 2.07   | 0       | 0       | 0      | 0      | 0      | 0       | 15.58  | 27.32   | 0      |
| 3-6.c2992/3/3198   | nicotinamide nucleotide trans   | 148231869 | NP_00108770 | 38.19  | 22.59 | 29.45  | 28.99   | 30.49   | 23.04  | 25.25  | 32.6   | 31.42   | 7.72   | 3.52    | 6.5    |
| 2-3.c3061/1/2339.1 | PREDICTED: uncharacterize       | 847164282 | XP_01282605 | 2.12   | 0.21  | 5.16   | 3.27    | 4.46    | 8.79   | 3.2    | 5.03   | 8.92    | 0.69   | 0.64    | 0.33   |
| 1-2.c4358/1/1830   | --                              | --        | --          | 0.94   | 2.23  | 0      | 0       | 0       | 0      | 0      | 0.77   | 0.58    | 2.73   | 3.31    | 1.35   |
| 1-2.c27458/1/1705  | polypeptide N-acetylgalactos    | 147900163 | NP_00108341 | 1.63   | 1.27  | 1.26   | 0.87    | 0       | 0.13   | 7.46   | 0.17   | 1.02    | 8.45   | 8.62    | 12.95  |
| 1-2.c33801/1/1212  | PREDICTED: hypothetical p       | 297293110 | XP_00280415 | 2.15   | 0     | 0      | 0       | 0       | 0      | 0.49   | 0      | 4.17    | 12.79  | 22.65   | 0      |
| 1-2.c14191/1/1604  | --                              | --        | --          | 0      | 0     | 0      | 0       | 0       | 0      | 0      | 0.45   | 0       | 5.04   | 0       | 4.99   |
| 2-3.c22823/1/2025  | PREDICTED: LOW QUALI            | 803125841 | XP_00401312 | 0      | 2.57  | 1.09   | 0       | 0       | 0      | 0.41   | 0      | 0       | 3.72   | 1.06    | 1.69   |
| 2-3.c48271/1/2321  | PREDICTED: myosin-7B [X         | 512871888 | XP_00293293 | 2.38   | 5.38  | 5.48   | 3.6     | 5.39    | 34.71  | 3.24   | 2.14   | 4.25    | 0      | 0       | 0      |



|                    |                                  |           |             |         |        |         |         |         |        |         |         |         |        |        |        |
|--------------------|----------------------------------|-----------|-------------|---------|--------|---------|---------|---------|--------|---------|---------|---------|--------|--------|--------|
| 1-2.c51741/5/1474  | PREDICTED: alpha-actinin-        | 558140034 | XP_00611831 | 538.55  | 147.12 | 689.32  | 728.87  | 582.17  | 687.91 | 577.83  | 618.25  | 600.7   | 157.41 | 106.79 | 182.66 |
| 3-6.e18560/2/2925  | myosin, heavy chain 4, skelet    | 47575800  | NP_00100124 | 0.77    | 0      | 1.55    | 2.35    | 1.47    | 0      | 1.93    | 2.29    | 0.52    | 0      | 0      | 0      |
| 1-2.e46143/1/1833  | --                               | --        | --          | 13.82   | 2.26   | 10.75   | 48.24   | 34.34   | 10.9   | 13.92   | 17.39   | 27.07   | 2.37   | 3.51   | 5.23   |
| 2-3.c40999/1/1986  | MGC84105 protein precursor       | 147904058 | NP_00108618 | 0       | 8.9    | 2.34    | 0.95    | 1.36    | 3.83   | 0.68    | 0       | 1.03    | 0      | 0      | 0      |
| 2-3.c42247/1/2475  | four and a half LIM domains      | 55742067  | NP_00100670 | 4.53    | 18.62  | 6.03    | 5.53    | 6.25    | 10.7   | 2.38    | 4.84    | 1.88    | 0      | 0      | 3.18   |
| 1-2.e11213/3/1769  | probable threonine--tRNA lig     | 156717366 | NP_00109622 | 0       | 28.16  | 0.08    | 0       | 0       | 0      | 2.75    | 9.16    | 5.09    | 4.87   | 0      | 0      |
| 2-3.c9371/1/2437   | PREDICTED: SUMO-activat          | 706145739 | XP_01020496 | 0       | 0      | 0       | 0       | 0       | 0      | 0       | 0       | 0       | 3.81   | 1.14   | 0.87   |
| 2-3.e54417/1/2126  | PREDICTED: myosin-4 [Xer         | 847156920 | XP_01282446 | 0.19    | 1.1    | 129.08  | 56.63   | 17.93   | 0.72   | 183.28  | 0       | 0.13    | 0      | 0.05   | 0      |
| 2-3.e20472/1/2390  | heterogeneous nuclear ribonu     | 147904138 | NP_00108421 | 0       | 0      | 0.92    | 0       | 0       | 0      | 0       | 0       | 0       | 8.81   | 0      | 5.16   |
| 2-3.c27428/3/2377  | PREDICTED: laminin subun         | 512844752 | XP_00293635 | 26.68   | 28.09  | 22.29   | 16.72   | 21.44   | 44.04  | 18.52   | 24.47   | 23.09   | 5.16   | 5.99   | 5.81   |
| 3-6.e17069/1/3326  | Hermansky-Pudlak syndrome        | 148226823 | NP_00108241 | 13.23   | 5.78   | 11.34   | 8.38    | 12.21   | 6.34   | 4.12    | 8.19    | 11.15   | 1.36   | 1.18   | 2.57   |
| 3-6.e11132/1/2948  | :PREDICTED: PDZ and LIM          | 847087387 | XP_01281714 | 3.75    | 0.37   | 14.44   | 23.36   | 13.86   | 9.2    | 4.94    | 10.39   | 10.49   | 1.34   | 0.15   | 5.67   |
| 2-3.c15131/1/2112  | PREDICTED: fibroblast grov       | 558127197 | XP_00611551 | 0       | 0      | 0       | 0       | 0       | 0      | 0       | 0       | 0       | 6.34   | 1.42   | 1.62   |
| 2-3.e19420/1/2212  | zinc finger protein 326 [Xeno    | 213624144 | AAI70704.1  | 0       | 0      | 0       | 0       | 0       | 0      | 0       | 0       | 0       | 6.13   | 4.1    | 0      |
| 2-3.e23967/2/2044  | --                               | --        | --          | 2.33    | 0.36   | 4.4     | 3.57    | 2.47    | 0.68   | 2.43    | 0       | 7.15    | 0      | 0.34   | 0      |
| 2-3.c44973/22/2595 | LOC443574 protein, partial [     | 48734648  | AAH72270.1  | 46.76   | 4.13   | 46.8    | 53.05   | 60.35   | 24.84  | 34.17   | 37.79   | 50.12   | 11.6   | 5.05   | 13.71  |
| 3-6.e14239/1/1545  | PREDICTED: glutamic acid-        | 780154032 | XP_01168211 | 5.69    | 8.2    | 3.37    | 5.3     | 5.09    | 11.78  | 19.02   | 4.04    | 5.12    | 97.54  | 145.37 | 110.35 |
| 2-3.e41298/2/2036  | --                               | --        | --          | 3.47    | 8.89   | 3.66    | 3.22    | 2.73    | 5.09   | 9.41    | 4.5     | 3.99    | 59.57  | 68.23  | 51.98  |
| 1-2.e26587/28/1348 | secreted protein acidic and ric  | 42407294  | BAD10858.1  | 64.39   | 741.97 | 221.8   | 136.91  | 173.11  | 382.62 | 162.44  | 91.49   | 108.06  | 43.17  | 14.31  | 83.7   |
| 1-2.e39308/1/1549  | --                               | --        | --          | 0.1     | 11.02  | 0.01    | 0       | 3.62    | 2.77   | 0       | 2.88    | 0.18    | 0      | 0      | 0      |
| 1-2.e44177/1/1133  | aspartate aminotransferase 2 [   | 148232563 | NP_00108025 | 0.48    | 67.95  | 0.43    | 157.82  | 135.12  | 84.38  | 159.68  | 114.8   | 185.22  | 0      | 100.79 | 0      |
| 2-3.c40433/1/2650  | --                               | --        | --          | 14      | 2.6    | 0.52    | 0.34    | 0.03    | 0      | 15.57   | 1.42    | 9.18    | 1.19   | 15.75  | 20.92  |
| 3-6.e9503/1/2768.1 | --                               | --        | --          | 1.43    | 4.81   | 0       | 0.59    | 0.66    | 2.39   | 0       | 1.05    | 22.81   | 28.38  | 28.24  | 0      |
| 1-2.e9579/1/1347.1 | PREDICTED: mucin-4-like i        | 847172448 | XP_01280947 | 46.62   | 12.84  | 43.28   | 14.35   | 28.58   | 7.01   | 11.63   | 26.36   | 10.98   | 2.42   | 0.26   | 1.32   |
| 2-3.c41066/1/2498  | PREDICTED: dynein heavy c        | 632937914 | XP_00790151 | 0.28    | 0      | 0.29    | 0       | 1.41    | 1.4    | 0       | 0       | 0.02    | 0      | 0      | 0      |
| 1-2.e45523/1/1441  | REST corepressor 1 [Xenopu       | 148233554 | NP_00108214 | 0       | 2.72   | 0       | 0       | 0       | 0.09   | 1.14    | 0       | 0       | 5.37   | 3.53   | 5.05   |
| 1-2.c32703/1/5049  | :larval type I keratin [Rana cat | 134140868 | ABO61147.1  | 14.32   | 4      | 4.7     | 5.64    | 12.61   | 3.14   | 9.33    | 2.4     | 7.86    | 0.87   | 0      | 0      |
| 1-2.c6334/2/1277   | PREDICTED: dnaI homolog          | 847168000 | XP_01282705 | 1.04    | 0.19   | 3.16    | 1.94    | 6.98    | 1.26   | 0       | 0.96    | 0       | 0      | 0      | 0      |
| 2-3.c366097/1/2475 | Putative transposase [Dicentr    | 317419774 | CBN81810.1  | 19.16   | 9.96   | 30.7    | 22.82   | 28.36   | 53.93  | 22.84   | 23.02   | 32.44   | 9.46   | 6.52   | 6.56   |
| 2-3.e7528/3/2575   | ena/VASP-like protein [Xeno      | 147905674 | NP_00108902 | 4.05    | 1.68   | 4.25    | 4.56    | 6.22    | 2.24   | 4.56    | 2.19    | 7.14    | 0.59   | 0.43   | 0.85   |
| 1-2.e12585/4/1522  | PREDICTED: nicotinamide r        | 542206422 | XP_00547665 | 35.21   | 25.14  | 22.8    | 6.46    | 29.39   | 13.45  | 2.32    | 20.76   | 42.69   | 0.51   | 2.31   | 0.27   |
| 1-2.e13547/1/1435  | PREDICTED: nebulin isofon        | 847166512 | XP_01282661 | 3.1     | 0      | 0       | 5.13    | 12.32   | 11.31  | 6.16    | 4.68    | 0       | 2.5    | 1.58   | 0      |
| 1-2.e37916/3/1339  | gamma-sarcoglycan [Xenopu        | 118404980 | NP_00107290 | 0       | 5.74   | 0       | 0       | 0       | 0      | 0       | 0.85    | 0       | 4.45   | 4.81   | 1.3    |
| 2-3.c32226/1/2467  | transmembrane 9 superfamily      | 147898405 | NP_00108858 | 0       | 0      | 0       | 0       | 7.79    | 3.86   | 0       | 0.07    | 0       | 0      | 0      | 0      |
| 2-3.e22641/2/2177  | fatty acyl-CoA reductase 1 [X    | 148229551 | NP_00107955 | 1.07    | 4.52   | 0.46    | 1.88    | 1.64    | 1.32   | 1.21    | 2.74    | 0.88    | 0      | 0.21   | 0      |
| 1-2.e49216/1/1273  | RecName: Full=mRNA cap g         | 82114931  | Q918S2.1    | 0       | 0      | 0       | 0       | 0       | 0      | 0       | 0       | 0       | 2.03   | 3.69   | 5.24   |
| 3-6.e15679/1/3575  | PREDICTED: alpha-actinin-        | 556954562 | XP_00598892 | 0.39    | 0      | 0.98    | 0.77    | 0.49    | 0.38   | 0.2     | 0.51    | 0.73    | 0      | 0      | 0      |
| 2-3.e44158/2/2112  | Uba1a protein [Xenopus laev      | 28958137  | AAH47256.1  | 0       | 0      | 0       | 0       | 0       | 0      | 0       | 0       | 0       | 4.97   | 3.78   | 0      |
| 1-2.e42210/2/1570  | Novel Ubiquitin carboxyl-ter     | 89272870  | CAJ81966.1  | 1.38    | 8.34   | 1.26    | 4.5     | 0.66    | 0.58   | 4.97    | 0.96    | 3.12    | 32.7   | 53.19  | 24.07  |
| 3-6.e17218/10/3324 | PREDICTED: titin-like [Alli      | 564226854 | XP_00625785 | 67.8    | 50.64  | 142.39  | 86.31   | 131.91  | 222.96 | 108.7   | 107.73  | 217.36  | 22.83  | 6.37   | 61.76  |
| 1-2.e14317/1/1307  | PREDICTED: casein kinase I       | 847117966 | XP_01281643 | 0.46    | 2.63   | 0       | 0       | 0       | 1.46   | 0.5     | 1.1     | 7.6     | 24.66  | 3.05   | 0      |
| 2-3.e56448/1/1995  | PREDICTED: NADH-ubiqui           | 697482752 | XP_00967305 | 104.31  | 24.27  | 99.72   | 91.72   | 62.33   | 24.13  | 55.4    | 80.59   | 83.92   | 0      | 3.45   | 19.76  |
| 1-2.e9252/2/1326   | --                               | --        | --          | 9.42    | 4.6    | 1.18    | 12.32   | 0.06    | 0.68   | 24.77   | 10.45   | 6.33    | 90.29  | 84.49  | 52.44  |
| 1-2.e14190/1/1477  | --                               | --        | --          | 30.31   | 15.2   | 9.95    | 16.19   | 1.86    | 9.95   | 55.96   | 7.32    | 31.1    | 244.25 | 167.29 | 103.57 |
| 2-3.c34850/1/1970  | PREDICTED: meprin A subu         | 542223736 | XP_00545132 | 0.87    | 0.89   | 0       | 0       | 0       | 0      | 0       | 0       | 0       | 4.41   | 5.96   | 0.81   |
| 3-6.e9499/1/3485   | ryanodine receptor alpha isof    | 538246    | BAA04646.1  | 73.66   | 31.62  | 145.06  | 79.84   | 109.27  | 140.38 | 57.65   | 83.73   | 86.18   | 16.09  | 27.87  | 30.98  |
| 1-2.e30360/1/1757  | --                               | --        | --          | 2.35    | 2.84   | 2.6     | 0       | 0       | 0      | 0       | 0       | 1.89    | 3.45   | 1.34   | 2.73   |
| 1-2.e3552/3/1500   | glutamyl-prolyl-tRNA synthe      | 189217812 | NP_00112134 | 0       | 0      | 0       | 0       | 0       | 0      | 0       | 0       | 0       | 0.06   | 22.17  | 11.68  |
| 2-3.e56691/1/2471  | PREDICTED: nebulin isofon        | 847166512 | XP_01282661 | 0.35    | 0.14   | 0       | 1.29    | 0.43    | 0.79   | 0.88    | 0.99    | 0       | 0      | 0      | 0      |
| 1-2.e5014/2/1358   | PREDICTED: collagen alpha        | 637250524 | XP_00811284 | 44.53   | 231.28 | 44.06   | 45.34   | 40.67   | 116.66 | 29.96   | 39.09   | 50.33   | 19.26  | 10.96  | 8.3    |
| 2-3.e49008/1/2174  | Na-K-2Cl cotransporter 1 [Xe     | 147904042 | NP_00109133 | 0.17    | 0      | 0       | 0       | 0       | 0      | 0       | 0       | 0       | 1.59   | 2.43   | 2.97   |
| 2-3.e56843/1/1977  | PREDICTED: HIRA-interact         | 512880191 | XP_00294081 | 0.63    | 4.22   | 0.36    | 0       | 1.65    | 2.15   | 0       | 0.2     | 0.53    | 0      | 0      | 0      |
| 1-2.e28773/1/1648  | --                               | --        | --          | 8.52    | 5.67   | 2.3     | 3.53    | 3.47    | 2.88   | 10.95   | 4.97    | 3.39    | 44.89  | 84.59  | 42.64  |
| 1-2.e34351/1/1306  | uncharacterized protein LOC      | 147902936 | NP_00108858 | 1.29    | 2.33   | 0       | 0       | 0       | 0.14   | 8.71    | 3.58    | 0.65    | 7.69   | 7.77   | 0.83   |
| 1-2.e45466/1/1326  | --                               | --        | --          | 0       | 0      | 0       | 0       | 0       | 0      | 0       | 0.78    | 0       | 8.44   | 6.69   | 0      |
| 3-6.e6106/1/7096   | PREDICTED: transmembran          | 847095053 | XP_01281107 | 4.59    | 2.38   | 1.55    | 1.03    | 3.57    | 1.37   | 1.88    | 3.39    | 2.44    | 0      | 0.06   | 0.25   |
| 1-2.e29347/1/2721  | larval type I keratin [Rana cat  | 134140868 | ABO61147.1  | 3093.57 | 497.45 | 1232.53 | 2384.93 | 2108.81 | 554.74 | 2548.23 | 1752.34 | 1689.95 | 241.89 | 384.73 | 174.34 |
| 2-3.c16695/1/2583  | RecName: Full=Sarcoplasmic       | 9789732   | Q92105.1    | 0.93    | 0.34   | 3.83    | 3.42    | 2.68    | 1.63   | 2.4     | 3.5     | 2.48    | 0      | 0      | 0.69   |

|                    |                                 |           |             |       |       |        |        |        |        |       |        |        |        |        |        |
|--------------------|---------------------------------|-----------|-------------|-------|-------|--------|--------|--------|--------|-------|--------|--------|--------|--------|--------|
| 1-2.c27882/2/1701  | WD repeat and SOCS box-co       | 45361625  | NP_989387.1 | 7.48  | 20.32 | 12.97  | 4.06   | 12.7   | 13.2   | 9.44  | 3.92   | 6.15   | 0      | 0      | 4.21   |
| 2-3.c56455/1/2014  | PREDICTED: Kruppel-like f       | 363744516 | XP_00364306 | 4.7   | 3.6   | 0.7    | 7.39   | 5.02   | 0.83   | 98.58 | 4.83   | 4.8    | 79.14  | 72.24  | 94.13  |
| 1-2.c34254/1/1421  | --                              | --        | --          | 96.58 | 11.6  | 183.53 | 120.98 | 156.92 | 150.47 | 113.9 | 132.58 | 148.12 | 36.05  | 20.42  | 38.16  |
| 3-6.c18923/8/3235  | PREDICTED: DNA ligase I         | 641783051 | XP_00817393 | 0.57  | 6.35  | 0.31   | 0.31   | 1.69   | 0.96   | 0.36  | 0.24   | 0.7    | 0      | 0      | 0.08   |
| 2-3.c29142/1/2065  | WD repeat-containing protein    | 55742525  | NP_00100678 | 8.95  | 13.25 | 6.47   | 0      | 0      | 0      | 0     | 3.49   | 0      | 5.86   | 0      | 4.16   |
| 3-6.c14138/2/4879  | PREDICTED: myosin-4 [Xer        | 847156920 | XP_01282446 | 0     | 0     | 0.65   | 0.61   | 0.79   | 0      | 0.64  | 0.49   | 0.81   | 0      | 0      | 0      |
| 2-3.c26791/1/2238  | --                              | --        | --          | 1.74  | 0     | 0      | 1.58   | 0      | 1.6    | 0.79  | 0      | 0      | 0      | 0      | 0      |
| 3-6.c7744/1/4048   | PREDICTED: laminin subun        | 512844752 | XP_00293635 | 0.63  | 0.94  | 1.79   | 0      | 1.24   | 2.51   | 0     | 0.71   | 2.96   | 0      | 0      | 0      |
| 2-3.c8534/1/2725.1 | hypothetical protein CAPTEI     | 443682880 | ELT87315.1  | 1.8   | 41.04 | 0.06   | 0      | 1.63   | 3.05   | 0.4   | 0      | 2.01   | 45.48  | 55.83  | 15.78  |
| 1-2.c43312/2/1802  | --                              | --        | --          | 11.82 | 32.99 | 54.72  | 41.84  | 41.35  | 130.67 | 71.22 | 46.87  | 63.25  | 6.89   | 3.84   | 9.48   |
| 2-3.c40890/1/2553  | clusterin preproprotein [Bufo   | 393717589 | AFN21430.1  | 19.93 | 0.6   | 4.18   | 20.97  | 0.44   | 0      | 28.62 | 13.83  | 8.37   | 161.75 | 109.91 | 84.87  |
| 1-2.c36805/1/1598  | --                              | --        | --          | 3.76  | 18.17 | 11.43  | 9.17   | 4.04   | 13.02  | 8.01  | 4.88   | 15.91  | 0.57   | 2.41   | 1.07   |
| 2-3.c49926/1/2414  | PREDICTED: complement c3        | 512820694 | XP_00293686 | 0     | 18.87 | 0      | 0      | 13.21  | 30.86  | 7.47  | 3.83   | 0      | 0      | 0      | 0      |
| 2-3.c58936/1/2126  | PREDICTED: ran-binding pr       | 543278705 | XP_00542741 | 0.62  | 0     | 0.32   | 0      | 0      | 0.11   | 1.14  | 1.06   | 0      | 4.61   | 3.62   | 1.36   |
| 3-6.c18497/1/4128  | splicing factor 3B subunit 1    | 147905376 | NP_00108415 | 2.57  | 0     | 1      | 0      | 0.74   | 0.78   | 0.54  | 1.95   | 2.35   | 0      | 0      | 0      |
| 1-2.c46666/1/1244  | cathepsin D-like precursor      | 218847782 | NP_00113637 | 3.45  | 0     | 0      | 0      | 0      | 0      | 0     | 0      | 2.82   | 10.69  | 18.04  | 0      |
| 2-3.c54007/1/2369  | --                              | --        | --          | 4.18  | 0     | 0      | 3.46   | 0      | 0.57   | 16.75 | 0      | 5.16   | 26.09  | 22.43  | 57.9   |
| 2-3.c42433/1/2065  | PREDICTED: laminin subun        | 512844752 | XP_00293635 | 10.63 | 17.1  | 8.34   | 4.92   | 4.83   | 11.8   | 4.35  | 6.14   | 5.25   | 1.03   | 0.05   | 1.91   |
| 3-6.c3874/1/3278   | PREDICTED: ATP-depende          | 795120083 | XP_01183217 | 0.42  | 5.18  | 0.78   | 0.64   | 0      | 1.11   | 1.85  | 0.12   | 0.5    | 13.04  | 15.4   | 4.55   |
| 1-2.c34250/1/1402  | hydroxyacid oxidase 2 (long     | 148234656 | NP_00108610 | 7.21  | 0.76  | 8.5    | 8.63   | 4.57   | 1.7    | 5.8   | 5.68   | 4.4    | 0      | 0      | 0.7    |
| 2-3.c14844/1/2111  | Kruppel-like factor 11 [Xeno]   | 148222922 | NP_00108601 | 22.76 | 8.68  | 1.82   | 5.66   | 1.6    | 0.94   | 19.69 | 33.1   | 12.88  | 20.21  | 93.26  | 90.34  |
| 2-3.c36164/2/1964  | PREDICTED: uveal autoanti       | 512827341 | XP_00491264 | 3.28  | 2.06  | 6.38   | 8.24   | 4.67   | 5.13   | 1.99  | 3.34   | 4.56   | 1.54   | 0      | 0.98   |
| 2-3.c36837/1/2221  | --                              | --        | --          | 5.14  | 10.13 | 3.8    | 1.96   | 3.58   | 6.03   | 1.19  | 1.33   | 4.96   | 0      | 0      | 0      |
| 2-3.c19300/1/2390  | --                              | --        | --          | 6.83  | 12.27 | 1.11   | 2.44   | 2.68   | 9.46   | 3.09  | 0.59   | 4.52   | 0      | 0      | 0.41   |
| 1-2.c43607/1/1622  | electron transfer flavoprotein  | 54020771  | NP_00100563 | 6.44  | 8.9   | 0      | 0.19   | 0      | 0      | 0     | 0.1    | 14.02  | 0.29   | 14.82  | 20.67  |
| 3-6.c16427/1/3493  | PREDICTED: laminin subun        | 512844752 | XP_00293635 | 6.77  | 3.47  | 6.07   | 1.6    | 4.98   | 3.78   | 0.11  | 5.87   | 3.47   | 0.23   | 0      | 1.17   |
| 1-2.c12109/2/1319  | PREDICTED: T-complex prc        | 700396110 | XP_00993867 | 1.58  | 30.27 | 0      | 5.82   | 0      | 0      | 44    | 8.06   | 12.76  | 39.51  | 48.44  | 25.18  |
| 1-2.c39934/1/1859  | --                              | --        | --          | 0.14  | 0.72  | 0.87   | 0.92   | 0.43   | 2.21   | 0     | 0.47   | 0      | 0      | 0      | 0      |
| 2-3.c1509/25/2579  | PREDICTED: methylmalony         | 512845229 | XP_00293366 | 22.49 | 22.24 | 19.61  | 23.85  | 22.11  | 14.79  | 14.79 | 12.36  | 21.41  | 3.82   | 3.24   | 5.88   |
| 2-3.c11789/7/2510  | autocrine motility factor recej | 147901912 | NP_00108315 | 7.47  | 0     | 1.51   | 2.05   | 3.96   | 0      | 0     | 3.71   | 1.53   | 0      | 0      | 0      |
| 2-3.c4729/1/2425   | PREDICTED: probable glob        | 847092406 | XP_01280806 | 0.45  | 11.56 | 1.61   | 1.08   | 4.66   | 2.86   | 0.41  | 2.47   | 4.04   | 0      | 0      | 0.78   |
| 2-3.c62044/1/2308  | PREDICTED: myosin-bindin        | 564233250 | XP_00626095 | 0.33  | 3.17  | 0      | 28.69  | 9.05   | 0      | 40.62 | 8.35   | 60.65  | 0      | 0      | 0.01   |
| 2-3.c13759/1/6896  | PREDICTED: serine/arginine      | 556960768 | XP_00599082 | 0     | 0     | 0      | 0      | 0      | 0      | 5.97  | 0      | 0      | 62.78  | 16.67  | 8.95   |
| 2-3.c16675/1/2169  | aryl hydrocarbon receptor nu    | 156717516 | NP_00109625 | 2.03  | 14.28 | 0.93   | 2.1    | 1.53   | 4.01   | 2.26  | 0.84   | 2.29   | 30.66  | 38.13  | 51.47  |
| 3-6.c8168/1/2699   | PREDICTED: sarcalumenin         | 861486921 | XP_01292095 | 6.92  | 1.35  | 6.57   | 6.74   | 6.87   | 3.5    | 9.93  | 7      | 11.33  | 0.58   | 0.85   | 1.46   |
| 1-2.c50517/1/1681  | SET and MYND domain con         | 148225404 | NP_00108546 | 0     | 0     | 0      | 0      | 1.92   | 2.05   | 0     | 0      | 0.04   | 0      | 0      | 0      |
| 2-3.c49598/1/2045  | Casp9-A protein [Xenopus la     | 213623754 | AAI70178.1  | 0     | 0     | 0      | 0      | 0      | 1.55   | 0.21  | 0      | 0      | 7.64   | 15.41  | 17.59  |
| 3-6.c3325/8/3377   | PREDICTED: exportin-2 iso       | 847167837 | XP_01282706 | 4.25  | 22.37 | 6.37   | 3.73   | 6.96   | 7.89   | 3.94  | 3.64   | 3.77   | 0.66   | 0.58   | 1.96   |
| 1-2.c25797/3/1313  | MGC52527 protein [Xenopus       | 28838469  | AAH47954.1  | 14.88 | 3.28  | 3.56   | 12.64  | 11.96  | 4.42   | 66.81 | 8.25   | 6.25   | 121.79 | 164.76 | 173.57 |
| 1-2.c44247/1/1329  | PREDICTED: retinal dehydr       | 348572972 | XP_00347226 | 0     | 0     | 0      | 0      | 0      | 0      | 0     | 0      | 0      | 30.74  | 13.61  | 0      |
| 1-2.c4672/1/1548   | periostin precursor [Xenopus    | 163915007 | NP_00110637 | 2.24  | 1.53  | 1.12   | 1.45   | 0.87   | 2.13   | 0.24  | 0.24   | 1.63   | 0      | 0      | 0      |
| 2-3.c26877/1/1989  | PREDICTED: myomegalin-li        | 573893936 | XP_00663471 | 1.44  | 1.02  | 3.43   | 1.12   | 2.26   | 5.77   | 1.01  | 2.18   | 1.27   | 0.13   | 0      | 0.25   |
| 1-2.c24317/1/1371  | keratin 5, gene 1 [Xenopus (S   | 54020785  | NP_00100563 | 1.86  | 0     | 0      | 1.86   | 0      | 0      | 5.12  | 0.12   | 7.87   | 16.49  | 21.9   | 10.25  |
| 1-2.c36522/1/1461  | --                              | --        | --          | 0     | 0     | 0      | 0      | 0      | 0      | 0     | 1.14   | 0      | 4.37   | 5.13   | 0.7    |
| 2-3.c35092/1/2101  | replication factor C subunit 1  | 313760612 | NP_00118645 | 0     | 0     | 0      | 0      | 1.56   | 2.33   | 0     | 0      | 0.81   | 0      | 0      | 0      |
| 3-6.c18647/2/3287  | LIM domain-binding protein      | 45360839  | NP_989095.1 | 13.08 | 7.61  | 36.99  | 36.01  | 39.96  | 52.97  | 44.19 | 20.87  | 50.92  | 11.37  | 2.45   | 14.03  |
| 3-6.c16786/1/3080  | PREDICTED: extracellular n      | 512865174 | XP_00294261 | 0     | 0     | 0.13   | 0      | 0      | 0      | 1.48  | 0.14   | 0      | 2.41   | 2.96   | 0      |
| 1-2.c33418/1/1575  | --                              | --        | --          | 1.87  | 5.89  | 5.69   | 2.7    | 16.13  | 11.04  | 0     | 6.28   | 13.42  | 0      | 0      | 1.86   |
| 3-6.c8762/1/3240   | PREDICTED: titin isoform X      | 847165031 | XP_01282625 | 4.38  | 4.63  | 10.14  | 7.11   | 5.57   | 20.63  | 8.79  | 3.95   | 7.95   | 0.4    | 0.6    | 1.57   |
| 1-2.c33122/1/1377  | PREDICTED: eukaryotic trar      | 847099370 | XP_01281221 | 0     | 0     | 0      | 0      | 0      | 0      | 0     | 0      | 0      | 13.5   | 28.58  | 0.01   |
| 1-2.c37933/2/1785  | PREDICTED: arf-GAP doma         | 847163505 | XP_01282586 | 0     | 0     | 0      | 0      | 0      | 0      | 0     | 0      | 0      | 3.84   | 0      | 4.04   |
| 1-2.c49467/1/1545  | MGC81975 protein [Xenopus       | 148223179 | NP_00108767 | 0     | 0     | 0      | 1.59   | 0      | 0      | 5.1   | 0      | 9.48   | 9.88   | 16.83  | 14.67  |
| 2-3.c22976/1/1986  | PREDICTED: beta-enolase is      | 837827704 | XP_01278517 | 0     | 0     | 0.87   | 2.98   | 1.17   | 0.35   | 0     | 1.07   | 0.89   | 0      | 0      | 0      |
| 2-3.c4097/35/2421  | tRNA methyltransferase 1 ho     | 147899382 | NP_00109025 | 2.71  | 3.17  | 1.34   | 0      | 1.59   | 0.79   | 0.45  | 1.13   | 0.9    | 0      | 0      | 0      |
| 2-3.c43589/1/2404  | PREDICTED: dolichyl-dipho       | 591383939 | XP_00706642 | 7.8   | 0     | 8.42   | 8.21   | 13.62  | 22.42  | 4.55  | 0.04   | 1.42   | 3.25   | 1.67   | 3.68   |
| 2-3.c61126/1/2466  | PREDICTED: nascent polype       | 847099448 | XP_01281224 | 0.26  | 1.37  | 1.42   | 1.71   | 1.32   | 0.39   | 0.64  | 0.21   | 1.87   | 0      | 0      | 0.08   |
| 1-2.c11274/1/1199  | PREDICTED: laminin subun        | 512850282 | XP_00293418 | 15.51 | 19.74 | 9.08   | 22.99  | 7.63   | 17.72  | 46.97 | 16.33  | 19.12  | 246.64 | 257.39 | 222.5  |
| 2-3.c7616/2/2430.1 | beta-hexosaminidase subunit     | 187607505 | NP_00112066 | 30    | 15.83 | 10.99  | 26.14  | 14.02  | 11.47  | 33.43 | 18.9   | 20.4   | 232.25 | 249.82 | 304.11 |

|                    |                                 |           |             |        |        |         |         |         |        |        |        |         |        |         |        |
|--------------------|---------------------------------|-----------|-------------|--------|--------|---------|---------|---------|--------|--------|--------|---------|--------|---------|--------|
| 2-3.c41053/1/2526  | PREDICTED: abhydrolase d        | 301613203 | XP_00293605 | 0.1    | 1.8    | 0.2     | 0.4     | 0       | 0.23   | 0      | 0.13   | 0.11    | 6.97   | 4.25    | 8.64   |
| 2-3.e53210/1/2595  | PREDICTED: neurogenic loc       | 512877935 | XP_0049193C | 3.61   | 13.76  | 3.67    | 4.62    | 1.12    | 6.46   | 1.65   | 3.69   | 3.53    | 0      | 0.27    | 0.94   |
| 3-6.e2443/15/3739  | PREDICTED: alpha-actinin-       | 602667068 | XP_0074391C | 164.69 | 9.15   | 190.41  | 158.77  | 274.7   | 211.58 | 231.35 | 264.79 | 245.81  | 59.75  | 32.38   | 60.29  |
| 1-2.c3899/1/1490   | histone-binding protein RBB1    | 160420243 | NP_00108036 | 0      | 0      | 0       | 0       | 0       | 0      | 0.01   | 0      | 0       | 1.73   | 5.77    | 1.58   |
| 2-3.e14016/1/2229  | --                              | --        | --          | 0      | 33.24  | 0       | 0       | 0       | 0      | 0      | 0      | 10.55   | 34.1   | 12.16   | 0      |
| 1-2.c32948/1/1450  | --                              | --        | --          | 16.9   | 11.97  | 6.35    | 9.8     | 12.01   | 4.84   | 44.67  | 11.59  | 10.49   | 123.25 | 137.54  | 164.53 |
| 1-2.c43402/1/1454  | --                              | --        | --          | 0.56   | 0      | 0.24    | 0       | 0       | 0      | 2.09   | 0      | 0.6     | 3.31   | 2.13    | 4.31   |
| 1-2.e48748/1/4054  | PREDICTED: creatine kinase      | 126344225 | XP_00136422 | 871    | 136.58 | 1208.24 | 1218.88 | 1023.33 | 548.77 | 471.69 | 835.99 | 1087.16 | 38.75  | 18.46   | 544.97 |
| 2-3.c11160/186/256 | MGC84250 protein [Xenopus]      | 148225296 | NP_0010879C | 443.29 | 24.68  | 419.93  | 853.57  | 432.41  | 227.95 | 263.28 | 398.58 | 468.31  | 61.34  | 13.32   | 75.59  |
| 3-6.c18511/1/2726  | PREDICTED: nebulin isofon       | 512865746 | XP_00491772 | 0.34   | 0.93   | 0       | 0       | 1.91    | 2.46   | 0.94   | 0      | 0       | 0      | 0       | 0      |
| 2-3.e23227/2/2303  | PREDICTED: nucleolar prot       | 847087222 | XP_01281665 | 2.12   | 4.76   | 0.88    | 2.06    | 1.69    | 3.92   | 1.23   | 0.28   | 0.34    | 0      | 0.27    | 0.39   |
| 2-3.e41745/1/2678  | cyclic AMP-responsive elem      | 163915079 | NP_00110635 | 0      | 6.21   | 0       | 0.16    | 0       | 0.08   | 10.07  | 0.15   | 6.7     | 36.75  | 0       | 28.75  |
| 2-3.c49988/1/1863  | RecName: Full=60S ribosom       | 82186247  | Q6P2Z6.1    | 42.98  | 56.72  | 22.59   | 18.31   | 17.92   | 38.91  | 25.3   | 18.68  | 14.28   | 4.86   | 4.65    | 5.89   |
| 2-3.e17993/1/2728  | PREDICTED: NACHT, LRR           | 699666029 | XP_00988355 | 0      | 1.09   | 0       | 0       | 0       | 0.02   | 7.71   | 0      | 0       | 7.64   | 0       | 16.27  |
| 1-2.c8694/2/1314.1 | dehydrogenase/reductase SDI     | 166158027 | NP_00110742 | 0      | 7.42   | 3.22    | 0       | 5.92    | 11.52  | 6.77   | 0      | 0       | 0      | 0       | 0      |
| 2-3.c51321/85/2577 | WD repeat-containing proteir    | 55742525  | NP_00100678 | 0      | 11.07  | 3.57    | 7.31    | 21.42   | 44.31  | 9.61   | 4.55   | 9.85    | 0.41   | 5.18    | 0.25   |
| 2-3.e24391/1/2078  | N-alpha-acetyltransferase 15,   | 282165843 | NP_0010170C | 7.8    | 9.53   | 3.25    | 3.15    | 4.61    | 7.75   | 0.66   | 3.22   | 2.7     | 0.31   | 0.67    | 1.1    |
| 1-2.e14903/1/1151  | PREDICTED: phosphate carr       | 742180842 | XP_01088807 | 0      | 2.2    | 0       | 0       | 0       | 0      | 0      | 0      | 0       | 73.9   | 22.87   | 2.44   |
| 2-3.c48401/1/2467  | --                              | --        | --          | 5.4    | 3.95   | 0.85    | 2.98    | 5.06    | 0.93   | 13.52  | 7.23   | 6.15    | 51.91  | 51.33   | 51.99  |
| 1-2.e30224/1/1451  | PREDICTED: short-chain de       | 683927591 | XP_0090938C | 0      | 0      | 0       | 0       | 0       | 0      | 0      | 0      | 0       | 11.07  | 6.65    | 0      |
| 2-3.c34151/1/2124  | zygotie Mcm3 protein [Xeno]     | 693576206 | BAP63985.1  | 0.37   | 12.09  | 0.01    | 0.95    | 0.84    | 3.32   | 0.1    | 0.58   | 1.37    | 0.11   | 0.12    | 0      |
| 3-6.c4380/2/3270.1 | nuclear factor 7, ovary [Xeno]  | 284447304 | NP_00107965 | 0.95   | 2.52   | 0.86    | 0       | 1.03    | 1.33   | 0.22   | 0.48   | 1.05    | 0      | 0       | 0      |
| 2-3.e22454/1/2571  | serine/arginine-rich splicing f | 55926178  | NP_00100748 | 0      | 0      | 0.65    | 1.11    | 0       | 1.43   | 0.91   | 0      | 0       | 0      | 0       | 0      |
| 3-6.e16738/1/3191  | PREDICTED: muscular LM2         | 512844542 | XP_0029349C | 39.99  | 2.41   | 13.08   | 18.11   | 20.97   | 6.28   | 8.52   | 13.57  | 18.47   | 1.94   | 5.89    | 2.96   |
| 2-3.c39725/1/2382  | PREDICTED: transmembran         | 847111917 | XP_0029323C | 0      | 4.27   | 0.13    | 0       | 0.21    | 2.9    | 0.5    | 0      | 0.21    | 37.51  | 57.69   | 11.77  |
| 3-6.e2412/8/2920   | origin recognition complex, s   | 148224764 | NP_0010818C | 0.59   | 10.46  | 0.39    | 0.4     | 2.04    | 2.32   | 0      | 0.97   | 0.46    | 0      | 0       | 0.27   |
| 1-2.c13865/1/1478  | PREDICTED: actin, alpha ca      | 803091489 | XP_00401102 | 4.09   | 0.24   | 17.03   | 14.49   | 8.29    | 9.46   | 19.41  | 21.17  | 9.57    | 1.75   | 1.16    | 2.27   |
| 3-6.c2487/27/3469  | incemp-prov protein, partial [  | 54038417  | AAH84167.1  | 0      | 5.94   | 0.28    | 0.35    | 0.91    | 2.12   | 0.21   | 0.49   | 0.85    | 0      | 0.17    | 0      |
| 2-3.e55924/1/2251  | nucleolar and coiled-body ph    | 89886147  | NP_00103481 | 15.44  | 34.39  | 4.44    | 9.52    | 10.1    | 15.1   | 7.1    | 9.33   | 4.45    | 1.56   | 3.2     | 2.18   |
| 1-2.e48929/1/1479  | PREDICTED: CCR4-NOT tr          | 847103286 | XP_01281312 | 0      | 0      | 0       | 0       | 0       | 0      | 0      | 0      | 0.52    | 2.71   | 5.42    | 0.99   |
| 2-3.c62226/22/2429 | ribosome biogenesis protein t   | 156717538 | NP_0010963C | 8.62   | 27.82  | 4.34    | 4.79    | 6.52    | 13.58  | 5.31   | 4.85   | 4.39    | 1.18   | 2.72    | 0.85   |
| 1-2.e1984/28/1918  | PREDICTED: UTP--glucose         | 847127397 | XP_0128183C | 131.21 | 14.5   | 53.73   | 92.56   | 107.07  | 25.02  | 28.85  | 88.35  | 79.04   | 20.98  | 10.14   | 6.45   |
| 3-6.e6481/1/3099   | PREDICTED: uncharacterize       | 672020665 | XP_00877445 | 2.79   | 0      | 1.23    | 0       | 0.76    | 0.44   | 0      | 0.89   | 8.99    | 7.22   | 9.15    | 9.15   |
| 3-6.e9111/1/3781   | PREDICTED: ubiquitin-prot       | 847099174 | XP_01281214 | 6.75   | 0.92   | 5.94    | 4.87    | 6.26    | 6.82   | 3.14   | 0.97   | 4.45    | 1.65   | 0.77    | 1.03   |
| 1-2.e34192/2/1617  | PREDICTED: intercellular ac     | 847169795 | XP_01280845 | 17.87  | 2.78   | 8.41    | 11.36   | 13.81   | 3.68   | 1.97   | 10.84  | 10.17   | 0.36   | 0.7     | 3.67   |
| 2-3.c46671/1/2124  | PREDICTED: transmembran         | 602626865 | XP_00742038 | 4.95   | 19.92  | 6.74    | 0       | 1.45    | 2.14   | 0      | 4.27   | 0       | 0      | 0       | 0      |
| 1-2.c3964/1/1248   | --                              | --        | --          | 27.92  | 0      | 0       | 16.04   | 3.96    | 7.4    | 35.45  | 64.29  | 41.03   | 465.91 | 1240.26 | 314.65 |
| 2-3.e55632/1/2196  | cytidine monophospho-N-ace      | 148227318 | NP_00109075 | 0.34   | 1.38   | 1.13    | 0.71    | 2.54    | 1.06   | 0.03   | 0      | 3.65    | 0      | 0       | 0      |
| 1-2.e24998/1/1762  | isocitrate dehydrogenase [NA    | 45361551  | NP_989352.1 | 108.43 | 15.1   | 47.81   | 93.84   | 71.62   | 47.11  | 58.71  | 21.48  | 32.28   | 14.03  | 0.11    | 31.71  |
| 2-3.c61366/8/2558  | PREDICTED: anaphase-pron        | 530617968 | XP_0052987C | 0.73   | 1.97   | 0.4     | 0.95    | 1.12    | 1.99   | 0      | 1.11   | 1.57    | 0      | 0.19    | 0      |
| 2-3.e16796/5/2676  | LOC414460 protein, partial [    | 46250336  | AAH68818.1  | 4.68   | 19.16  | 2.86    | 3.39    | 4.45    | 10.4   | 4.73   | 2.63   | 3.07    | 1.06   | 1.02    | 0.99   |
| 2-3.c16350/1/2354  | --                              | --        | --          | 26.31  | 13.44  | 3.32    | 16.77   | 0.9     | 6.31   | 25.03  | 14.99  | 37.04   | 159.65 | 181.84  | 92.74  |
| 2-3.c34115/1/2116  | --                              | --        | --          | 0      | 4.54   | 1.52    | 0       | 0       | 0      | 0      | 0      | 0       | 3.22   | 3.24    | 1.88   |
| 1-2.e30817/1/1152  | solute carrier family 7 memba   | 45361265  | NP_989210.1 | 30.72  | 6.92   | 13.55   | 61.89   | 9.21    | 0.94   | 28.9   | 59.83  | 48.02   | 256.33 | 542.45  | 318.51 |
| 2-3.c13511/1/2113  | conserved hypothetical protei   | 170067775 | XP_00186861 | 7.34   | 0.16   | 0.39    | 2.48    | 7.24    | 0.13   | 23.34  | 3.31   | 4.82    | 94     | 51.11   | 50.7   |
| 2-3.c21618/1/1967  | PREDICTED: ras-related pro      | 768342989 | XP_01159391 | 0      | 0      | 0       | 0       | 0       | 0      | 0      | 0      | 0       | 68.34  | 216.57  | 0      |
| 1-2.e11480/1/1682  | LOC733374 protein [Xenopus]     | 76779620  | AAI06554.1  | 216.25 | 109.1  | 97.13   | 106.98  | 63.11   | 54.8   | 40.06  | 100.09 | 103.95  | 17.69  | 18.72   | 13.82  |
| 2-3.c30661/1/2621  | --                              | --        | --          | 20.02  | 28.34  | 19.94   | 11.52   | 18.94   | 33.1   | 22.6   | 14.02  | 22.84   | 2.71   | 4.9     | 5.93   |
| 1-2.e41119/1/1557  | von Willebrand factor A dom     | 148228482 | NP_00107996 | 20.73  | 21.83  | 18.07   | 16.04   | 21.01   | 12.21  | 29.4   | 13.29  | 19.09   | 228.2  | 231.85  | 332.83 |
| 2-3.e40469/1/2089  | mothers against decapentaple    | 55926152  | NP_00100748 | 0      | 15.43  | 1.35    | 1.01    | 1.14    | 0.81   | 0      | 1.98   | 0.2     | 0      | 0       | 0      |
| 2-3.e49992/1/2073  | --                              | --        | --          | 0      | 3.18   | 0       | 0       | 0       | 0      | 0      | 0      | 2.98    | 10.04  | 12.48   | 0      |
| 1-2.e24386/5/1731  | PREDICTED: protein PFC07        | 556961274 | XP_00599098 | 3.74   | 2.8    | 9.69    | 4.49    | 5.52    | 22.97  | 5.3    | 4.44   | 7.73    | 0.25   | 0       | 0.21   |
| 1-2.e15630/1/1562  | ubiquitin-like domain-contair   | 148231101 | NP_0010878C | 2.94   | 3.26   | 0.55    | 1.64    | 0.86    | 1.41   | 3.19   | 1.98   | 3.1     | 25.01  | 34.78   | 15.6   |
| 1-2.c36842/2/1375  | --                              | --        | --          | 11.88  | 198.12 | 12.75   | 14.92   | 13.87   | 38.05  | 7.88   | 12.39  | 19.62   | 4.77   | 2.28    | 5.58   |
| 2-3.c17272/18/1977 | PREDICTED: alpha-aminoac        | 59777684  | XP_00725245 | 12.84  | 14.06  | 22.79   | 5.85    | 22.08   | 42.28  | 16.86  | 10.2   | 12.26   | 2.01   | 2.93    | 0      |
| 1-2.e41160/1/1501  | --                              | --        | --          | 1.3    | 1.44   | 0.51    | 0.84    | 1.12    | 0.34   | 0.48   | 0.63   | 0.95    | 44.33  | 26.2    | 22.35  |
| 2-3.e9619/3/2210.1 | E3 ubiquitin-protein ligase M   | 62858193  | NP_00101691 | 7.5    | 9.39   | 6.88    | 4.62    | 7.79    | 5.99   | 0.92   | 3.18   | 3.08    | 0      | 0       | 1.76   |
| 3-6.e7025/1/3178   | --                              | --        | --          | 12.01  | 2.41   | 14.93   | 8.73    | 18.36   | 41.62  | 13.45  | 11.23  | 11.25   | 2.36   | 1.99    | 1.96   |

|                     |                                 |           |             |          |         |          |         |          |          |          |         |          |        |        |          |
|---------------------|---------------------------------|-----------|-------------|----------|---------|----------|---------|----------|----------|----------|---------|----------|--------|--------|----------|
| 1-2.c40202/1/1606   | Serine/threonine-protein phos   | 677443430 | KFQ38846.1  | 1.78     | 2.49    | 0        | 0       | 0        | 0        | 0.25     | 0.49    | 0        | 4.97   | 1.66   | 1.44     |
| 1-2.c43177/1/1346.1 | PREDICTED: target of rapan      | 847163389 | XP_01282582 | 0        | 0       | 0        | 0       | 0        | 0        | 0        | 0       | 0        | 23.75  | 43.84  | 0.09     |
| 2-3.c53370/1/2190   | --                              | --        | --          | 0        | 0       | 0        | 0       | 1.91     | 2.59     | 1.35     | 0       | 0        | 0      | 0      | 0        |
| 3-6.c15037/1/5322   | staphylococcal nuclease and t   | 148234849 | NP_00107960 | 2.47     | 0       | 0        | 0       | 0        | 0        | 0        | 0       | 0        | 1      | 1.24   | 2.85     |
| 2-3.c20184/1/1791   | PREDICTED: adipocyte enh        | 557297871 | XP_00603123 | 0        | 27.4    | 0        | 0       | 0        | 0        | 0        | 0       | 7.26     | 10.09  | 5.62   | 0        |
| 1-2.c12917/2/1731   | --                              | --        | --          | 0.78     | 3.15    | 0.72     | 0.85    | 0.58     | 2.54     | 0        | 0       | 0        | 0      | 0      | 0        |
| 1-2.c29263/1/1833   | --                              | --        | --          | 11.9     | 5.4     | 10       | 7.57    | 11.38    | 6.12     | 9.16     | 8.9     | 8.5      | 2.17   | 2.2    | 0.47     |
| 2-3.c1464/77/1952   | PREDICTED: voltage-depen        | 823417697 | XP_01241955 | 88.9     | 37.76   | 74.38    | 60.4    | 68.81    | 106.22   | 73.47    | 82.67   | 64.3     | 13.32  | 11.07  | 28.1     |
| 1-2.c19914/1/1673   | PREDICTED: serine/arginine      | 768366525 | XP_01158055 | 0        | 0       | 0        | 0       | 0        | 0        | 0        | 0       | 0        | 27.81  | 70.27  | 0        |
| 1-2.c49552/1/1183   | PREDICTED: titin-like [Pyth     | 602631486 | XP_00742264 | 6.56     | 0.13    | 100.6    | 28.65   | 51.18    | 83.12    | 31.43    | 38.97   | 18.04    | 0      | 0      | 30.63    |
| 1-2.c26986/2/1646   | PREDICTED: microtubule-as       | 831279932 | XP_01267097 | 3.14     | 28.36   | 1.05     | 0.89    | 0.01     | 1.57     | 0        | 0       | 3.18     | 17.58  | 16.96  | 14.52    |
| 1-2.c35145/1/1621   | PREDICTED: polyadenylate        | 696972430 | XP_00955615 | 36.61    | 37.09   | 23.72    | 29.71   | 40.79    | 16.43    | 19.32    | 20.04   | 34.33    | 4.19   | 5.49   | 9.54     |
| 2-3.c42919/1/2172   | PREDICTED: glucose-6-pho        | 847118565 | XP_01281665 | 0.92     | 3.89    | 0.46     | 0.82    | 0.5      | 1.66     | 6.19     | 0.63    | 0.44     | 15.42  | 10.78  | 25.33    |
| 3-6.c13045/2/2981   | PREDICTED: serine/threonir      | 512819921 | XP_00491168 | 1.03     | 0.59    | 0.26     | 0.93    | 0.38     | 0.4      | 14.76    | 1.15    | 0.49     | 14.75  | 10.09  | 9.09     |
| 2-3.c12584/5/2220   | PREDICTED: schwannomin          | 847126599 | XP_01281810 | 2.33     | 3.21    | 5.64     | 0.95    | 4.29     | 17.61    | 1.18     | 4.6     | 5.12     | 0      | 0      | 0        |
| 2-3.c29453/1/2784   | PREDICTED: uncharacterize       | 847159899 | XP_01282497 | 3.44     | 0.02    | 1.04     | 1.78    | 2.51     | 0.45     | 2.99     | 0       | 0        | 0      | 0      | 0.3      |
| 1-2.c26140/1/1459   | protein archease [Xenopus (S    | 62857601  | NP_00101675 | 0        | 0       | 0        | 0       | 0        | 0        | 0.22     | 0       | 0        | 4.14   | 10.63  | 1.25     |
| 2-3.c29827/1/1848   | PREDICTED: tenascin isofor      | 512858291 | XP_00491677 | 19.89    | 72.22   | 42.67    | 20.54   | 25.12    | 40.47    | 19.1     | 18.75   | 23.55    | 10.56  | 3.49   | 3.83     |
| 1-2.c39101/1/1218   | tomm22 protein [Xenopus (S      | 169642622 | AAI60473.1  | 15.66    | 21.64   | 8.47     | 7.6     | 5.94     | 11.9     | 0.57     | 0.32    | 5.8      | 0.51   | 0      | 2.51     |
| 1-2.c51053/5/1453   | protein disulfide isomerase fa  | 148226947 | NP_00108005 | 0        | 0       | 0        | 0       | 0        | 0        | 3.82     | 0       | 0        | 21.63  | 58.92  | 0        |
| 1-2.c13765/1/1210   | --                              | --        | --          | 114.42   | 79.63   | 176.84   | 110.57  | 118.74   | 272      | 137.51   | 160.25  | 154.52   | 46.06  | 28.74  | 40.26    |
| 1-2.c24570/3/1494   | PREDICTED: methionine-R-        | 640823407 | XP_00806872 | 0        | 0       | 0        | 0       | 0        | 0        | 0        | 0       | 0        | 5.07   | 5.84   | 0        |
| 2-3.c34629/1/2074   | --                              | --        | --          | 4.7      | 5.42    | 4.68     | 12.27   | 7.38     | 6.33     | 7.12     | 5.9     | 6.85     | 1.43   | 2.52   | 1.06     |
| 1-2.c16804/1/1505   | PREDICTED: atrial natriuret     | 742130720 | XP_01087616 | 0        | 17.22   | 3.07     | 0       | 0        | 0        | 7.1      | 0       | 13.03    | 16.56  | 0      | 8.61     |
| 1-2.c31003/1/1397   | --                              | --        | --          | 2.73     | 0.46    | 8.17     | 3.51    | 3.09     | 2.07     | 2.23     | 3.37    | 3.6      | 0.39   | 0      | 0        |
| 1-2.c35832/1/1303   | PREDICTED: LOW QUALI            | 700363815 | XP_00992652 | 0        | 794.57  | 0        | 0       | 0        | 0        | 54.7     | 0       | 944.15   | 121.27 | 98.02  | 1770.21  |
| 1-2.c46263/1/6247   | larval type I keratin [Rana cat | 134140868 | ABO61147.1  | 4229.17  | 786.65  | 1022.45  | 2490.96 | 2269.79  | 421.38   | 2452.1   | 1186.35 | 1052.22  | 142.64 | 225.67 | 171.43   |
| 1-2.c51758/3/1422   | ATP synthase subunit alpha, 1   | 71896075  | NP_00102561 | 0        | 0       | 0        | 0       | 0        | 0        | 3.97     | 0.06    | 0        | 21.86  | 0.03   | 71.12    |
| 2-3.c24449/1/2240   | tripeptidyl-peptidase 1 precu   | 156717508 | NP_00109625 | 0        | 0.15    | 1.1      | 8.66    | 3.64     | 0        | 1.77     | 0.23    | 2.17     | 0      | 0      | 0        |
| 2-3.c37395/1/2492   | microtubule-associated protei   | 148232096 | NP_00108054 | 1.83     | 0.64    | 0.57     | 0.94    | 0.97     | 0        | 4.36     | 3.71    | 0        | 34.23  | 37.44  | 6.13     |
| 2-3.c32298/2/2537   | PREDICTED: ralBP1-associ        | 847128049 | XP_01281857 | 0.12     | 4.92    | 6.29     | 7.08    | 11.06    | 6.58     | 0.63     | 7.33    | 5.58     | 0      | 1.83   | 2.86     |
| 2-3.c43021/1/2102   | PREDICTED: polynucleotide       | 512854490 | XP_00293385 | 0        | 0       | 0        | 0       | 0        | 0        | 2.06     | 0       | 0        | 2.62   | 2.72   | 0.49     |
| 1-2.c49081/1/1290   | PREDICTED: tetraaricopepti      | 512840241 | XP_00293150 | 2.02     | 0.84    | 1.82     | 0.59    | 1.44     | 1.41     | 10.21    | 0.12    | 1.56     | 25.77  | 24.44  | 24.52    |
| 3-6.c13351/1/3275   | elongation factor Tu GTP bin    | 148225911 | NP_00107953 | 7.94     | 17.4    | 4.16     | 3.01    | 5.91     | 6.45     | 1.8      | 3.05    | 2.38     | 0.92   | 0.44   | 1.31     |
| 2-3.c34000/1/2484   | --                              | --        | --          | 4.31     | 12.14   | 4.72     | 2.07    | 3.19     | 11.86    | 0        | 1.17    | 0        | 0.29   | 0      | 0        |
| 1-2.c32267/1/1442   | calsequestrin-2 precursor [Xe   | 45360999  | NP_989136.1 | 258.21   | 73.88   | 638.77   | 264.16  | 316.27   | 79.27    | 426.34   | 131.21  | 391.29   | 56.63  | 46.45  | 26.41    |
| 1-2.c12339/1/1403   | tropomodulin 4 (muscle) [Xe     | 148233551 | NP_00108736 | 241.63   | 129.02  | 489.05   | 349.39  | 348.08   | 414.4    | 303.42   | 341.07  | 404.11   | 117.81 | 51.22  | 97.85    |
| 1-2.c8721/2/1375    | protein FAM192A [Xenopus        | 187608361 | NP_00112024 | 6        | 12.64   | 5.83     | 2.8     | 5.5      | 3.3      | 5.77     | 1.31    | 0.21     | 0.28   | 0.83   | 0        |
| 1-2.c34731/1/1599   | ADP-ribosyltransferase 1 pre    | 160420185 | NP_00110420 | 20.07    | 6.57    | 18.26    | 20.39   | 37.24    | 17.99    | 3.49     | 30.56   | 22.37    | 2.7    | 0      | 12.24    |
| 1-2.c33213/1/1521   | --                              | --        | --          | 0        | 2.56    | 0        | 0       | 0        | 0.4      | 1.46     | 0.4     | 0.17     | 2.06   | 10.45  | 6.11     |
| 2-3.c12588/1/2552   | PREDICTED: asparagine syr       | 301603748 | XP_00293157 | 0        | 0       | 0        | 0       | 0        | 0        | 0.52     | 0.25    | 0        | 4.58   | 7.35   | 0        |
| 1-2.c41256/1/1477   | vasohibin-1 [Xenopus (Silura    | 213982977 | NP_00113565 | 0.32     | 3.22    | 0.82     | 0.55    | 0.39     | 0        | 1.19     | 0.55    | 0.83     | 9.97   | 13.8   | 6.24     |
| 3-6.c8592/1/3030    | tax1-binding protein 1 homol    | 45361339  | NP_989247.1 | 6.5      | 4.68    | 7.17     | 5.51    | 8.99     | 4.48     | 3.57     | 4.95    | 3.97     | 0.66   | 0.46   | 2.27     |
| 1-2.c15735/1/3362   | PREDICTED: DCN1-like pr         | 847098455 | XP_01281185 | 0        | 0       | 0        | 0       | 0        | 0        | 0        | 0       | 0        | 10.13  | 5.42   | 0.54     |
| 1-2.c12815/1/1636   | PREDICTED: dedicator of cy      | 700433889 | XP_00995586 | 0        | 0       | 0        | 0       | 0        | 0        | 1.91     | 0       | 0.19     | 4.33   | 4.83   | 0        |
| 1-2.c17657/1/1218   | PREDICTED: rho GTPase-ac        | 847148811 | XP_01282258 | 1.45     | 1.35    | 0.83     | 1.06    | 0        | 0        | 1.3      | 0       | 2.72     | 11.34  | 31.07  | 10.26    |
| 2-3.c14572/2/1965   | PREDICTED: myosin-4-like        | 301611451 | XP_00293525 | 0        | 0       | 5.59     | 1.38    | 1.87     | 0        | 0.97     | 1.88    | 0.71     | 0      | 0      | 0        |
| 2-3.c33357/1/2167   | uncharacterized protein LOC     | 148222298 | NP_00108500 | 0.22     | 1.71    | 1.89     | 0       | 1.27     | 1.76     | 0        | 0       | 0.92     | 0      | 0      | 0        |
| 2-3.c9416/1/2462    | PREDICTED: translocation f      | 831212036 | XP_01265985 | 0        | 0       | 0        | 0       | 0        | 0        | 0        | 0       | 0        | 2.63   | 0      | 4.29     |
| 1-2.c19076/3/1506   | RecName: Full=UPF0489 pr        | 123893185 | Q28H30.1    | 4.7      | 10.6    | 4.8      | 4.27    | 4.99     | 9.6      | 1.49     | 2.84    | 3.07     | 1.12   | 0.06   | 1.05     |
| 1-2.c14240/1/2490   | secreted protein acidic and ric | 42407294  | BAD10858.1  | 97.8     | 883.51  | 246.33   | 179.09  | 245.63   | 500.28   | 226.45   | 108.12  | 137.68   | 74.64  | 27.58  | 96.25    |
| 2-3.c6626/1/2125    | --                              | --        | --          | 2.34     | 4.6     | 0.58     | 3.09    | 0        | 0.74     | 2.21     | 2.48    | 2.93     | 29.46  | 20.09  | 18.72    |
| 2-3.c27015/1/2555   | --                              | --        | --          | 0        | 1.01    | 1.47     | 1.67    | 2.33     | 2.93     | 1.71     | 1.16    | 0.94     | 42.93  | 76.65  | 36.57    |
| 1-2.c8562/2/1334    | matriptase a [Xenopus laevis]   | 148228853 | NP_00108106 | 16.72    | 5.35    | 11.81    | 13.46   | 3.59     | 2.22     | 25.97    | 7.36    | 15.65    | 91.97  | 116.69 | 94.23    |
| 1-2.c44212/1/1259   | --                              | --        | --          | 64.82    | 6.29    | 18.05    | 30.28   | 37.63    | 4.22     | 53.93    | 64.68   | 72.88    | 330.75 | 435.71 | 336.92   |
| 2-3.c11765/26/2074  | small nucleolar RNA-assc        | 147905015 | NP_00108016 | 3.09     | 9.64    | 2.2      | 2.9     | 2.7      | 5.84     | 2.79     | 1.46    | 1.18     | 0.55   | 0.15   | 0.57     |
| 2-3.c4253/1/2522    | PREDICTED: creatine kinas       | 126344225 | XP_00136422 | 15689.85 | 1857.43 | 39160.21 | 27110.1 | 29684.49 | 15442.67 | 18055.52 | 36723.1 | 30214.51 | 67.71  | 52.61  | 15858.65 |
| 1-2.c21603/1/1337   | baculoviral IAP repeat contai   | 148228259 | NP_00108673 | 117.89   | 18.99   | 18.51    | 41.28   | 13.22    | 17.83    | 73.86    | 123.07  | 43.13    | 321.67 | 515.32 | 232.61   |

|                     |                                 |               |             |        |        |        |           |        |        |        |        |        |        |        |
|---------------------|---------------------------------|---------------|-------------|--------|--------|--------|-----------|--------|--------|--------|--------|--------|--------|--------|
| 2-3.c14953/1/2242   | --                              | --            | 8.47        | 288.36 | 17.68  | 38.53  | 13.37     | 71.57  | 30.46  | 20.21  | 46.54  | 485.93 | 862.33 | 363.26 |
| 2-3.c47350/1/2139   | PREDICTED: LOW QUALI            | 512830904     | XP_00293188 | 3.71   | 14.36  | 0      | 3.77      | 1.42   | 18.41  | 1.45   | 0      | 0.07   | 0      | 0      |
| 1-2.c14384/1/1556   | alpha-actinin-4 [Xenopus        | (Sil 55741892 | NP_00100681 | 3.96   | 3.36   | 2.27   | 10.15     | 0      | 6.9    | 25.35  | 2.23   | 15.75  | 133.74 | 226.56 |
| 2-3.c30934/1/1851   | PREDICTED: protein PFC07        | 556961274     | XP_00599098 | 0.31   | 0      | 0      | 0.42      | 0.95   | 2.19   | 0.23   | 0.42   | 0.69   | 0      | 0      |
| 2-3.c6292/1/2537    | --                              | --            | --          | 1.38   | 35.84  | 7.37   | 2.46      | 1.02   | 5.58   | 3.29   | 4.24   | 3.39   | 0.26   | 0.18   |
| 2-3.c7762/3/2228.2  | --                              | --            | --          | 0.21   | 42.16  | 0      | 4.35      | 5.39   | 15.42  | 7.12   | 4.42   | 6.68   | 136.5  | 213.38 |
| 2-3.c43189/1/2239   | cingulin [Xenopus laevis]->gi   | 148237354     | NP_00108197 | 9.59   | 2.63   | 4.35   | 6.14      | 5.97   | 1.89   | 12.5   | 5.21   | 3.03   | 59.22  | 68.98  |
| 1-2.c25517/3/1770.  | PREDICTED: leukotriene B4       | 512817971     | XP_00293437 | 17.24  | 26.97  | 6.04   | 14.91     | 7.01   | 6.68   | 26.23  | 12.95  | 15.75  | 178.23 | 159.26 |
| 1-2.c17190/1/1919   | PREDICTED: protein SET is       | 847153649     | XP_01282360 | 32.06  | 112.66 | 32.21  | 14.83     | 24.51  | 27.53  | 16.9   | 15.39  | 23.14  | 0      | 3.03   |
| 1-2.c2092/29/1416   | PREDICTED: 2-oxoisovaleri       | 512841749     | XP_00293625 | 23.47  | 30     | 25.19  | 21.35     | 19.62  | 25.73  | 19.1   | 14.84  | 21.27  | 4.43   | 5.53   |
| 3-6.e10780/1/2885   | PREDICTED: PDZ and LIM          | 847087387     | XP_01281714 | 0.66   | 0.43   | 1.1    | 3.79      | 2.97   | 4.56   | 2.55   | 1.72   | 2.35   | 0.43   | 0.25   |
| 2-3.e9059/2/2298    | succinate dehydrogenase [ubi    | 148237169     | NP_00108347 | 0      | 7.56   | 0.24   | 0         | 0      | 0      | 0      | 0      | 0      | 0      | 12.51  |
| 2-3.c17034/1/2564   | von Willebrand factor A dom     | 148284842     | NP_00107996 | 45.37  | 17.96  | 33.35  | 33.11     | 47.39  | 20.6   | 32.02  | 25.91  | 22.76  | 6.73   | 6.06   |
| 2-3.c4247/1/1873    | tin2 protein [Xenopus (Silura   | 166796755     | AAI59153.1  | 58.72  | 34.59  | 54.54  | 40.6      | 34.7   | 41.77  | 56.6   | 36.23  | 37.69  | 1.06   | 9.95   |
| 1-2.c7224/1/1644    | --                              | --            | --          | 21.06  | 0      | 0      | 0         | 11.37  | 0      | 4.9    | 51.18  | 11.03  | 130.76 | 63.6   |
| 3-6.c4847/1/2806    | Glycogen phosphorylase, mu:     | 465954282     | EMP25833.1  | 216.14 | 4.33   | 252.43 | 328.45    | 164.99 | 85.76  | 103.7  | 203.5  | 168.64 | 0      | 2.99   |
| 1-2.c41960/1/1601   | PREDICTED: pyruvate dehy        | 530574466     | XP_00528163 | 103.17 | 67.69  | 152.07 | 26.01     | 90.09  | 78.65  | 65.1   | 24.99  | 96.7   | 25.07  | 3.53   |
| 2-3.c27242/1/2599   | MGC84250 protein [Xenopus       | 148225296     | NP_00108790 | 51.84  | 2.96   | 40.61  | 148225296 | 65.23  | 99.39  | 71.23  | 75.14  | 99.7   | 26.92  | 14.43  |
| 2-3.c33014/1/2256   | PREDICTED: carnosine synt       | 847171322     | XP_00491926 | 3.95   | 5.78   | 5.41   | 3.99      | 5.19   | 12.88  | 3.45   | 3.2    | 4.64   | 1.41   | 0.51   |
| 1-2.c29999/2/1408   | PREDICTED: NADP-depenc          | 301618178     | XP_00293850 | 19.61  | 0.93   | 2.53   | 9.51      | 4.69   | 8.81   | 14.88  | 9.73   | 9.54   | 81.04  | 98.85  |
| 2-3.c16068/5/2313   | CMYA4 protein, partial [Xen     | 51261725      | AAH80138.1  | 0.27   | 0      | 1.76   | 0.98      | 1.2    | 6.5    | 0      | 0.28   | 0      | 0      | 0      |
| 1-2.c21179/1/1630   | DNA replication licensing fac   | 147898891     | NP_00108075 | 2.06   | 25.67  | 2.05   | 0.96      | 4.4    | 7.46   | 0.27   | 0.66   | 1.73   | 0.16   | 0      |
| 3-6.e18437/1/3149   | --                              | --            | --          | 13.19  | 4.49   | 3.42   | 1.98      | 7.51   | 5.04   | 14.69  | 11.02  | 7.18   | 94.17  | 83.48  |
| 1-2.c19791/3/1563   | phosphorylase phosphatase [?    | 963087        | CAA56714.1  | 11.51  | 14.92  | 0      | 0         | 0      | 4.71   | 4.78   | 4.83   | 0      | 17.2   | 25.67  |
| 2-3.c7237/5/2079    | PREDICTED: calpain-3 isofc      | 512862211     | XP_00293538 | 6.08   | 15.56  | 9.77   | 9.59      | 11.39  | 43.86  | 6.88   | 3.25   | 1.26   | 0.56   | 0      |
| 1-2.c2794/3/1695    | ubiquitin carboxyl-terminal h   | 54020791      | NP_00100564 | 7.15   | 1.04   | 2.07   | 0         | 5.09   | 2.95   | 0      | 1.32   | 0      | 0      | 0      |
| 1-2.c31478/1/1144   | V-type proton ATPase subun      | 52345764      | NP_00100492 | 13.36  | 8.56   | 0.12   | 12.09     | 12.85  | 5.19   | 2.69   | 5.08   | 0.12   | 0      | 3.96   |
| 1-2.c43290/1/1412   | PREDICTED: lysosome-asso        | 847098867     | XP_01281203 | 11.93  | 9.75   | 0.68   | 21.45     | 8      | 0.85   | 0      | 6.12   | 7.89   | 0      | 0      |
| 2-3.e14397/1/2304.: | --                              | --            | --          | 3.48   | 1      | 5.53   | 3.23      | 3.55   | 9.54   | 1.79   | 2.44   | 1.71   | 0.14   | 0.16   |
| 2-3.c50318/1/2527   | PREDICTED: WD repeat-coi        | 512828612     | XP_00491281 | 1.47   | 11     | 1.47   | 1.22      | 2.84   | 6.74   | 1.25   | 1.29   | 0.82   | 0.36   | 0.33   |
| 2-3.c7688/1/2006    | PREDICTED: myosin-4 [Xen        | 847156920     | XP_01282446 | 108.79 | 6.88   | 110.43 | 13.93     | 55.68  | 0      | 0      | 303.11 | 96.06  | 0      | 0.01   |
| 3-6.e14902/1/3185   | PREDICTED: U5 small nucl        | 512827234     | XP_00293258 | 0.85   | 10.37  | 0.7    | 0.55      | 1.83   | 2.54   | 1.05   | 2.22   | 0      | 0      | 0.36   |
| 1-2.c5194/1/1341    | PREDICTED: dystrobrevin b       | 557318474     | XP_00603242 | 0      | 0      | 0      | 0         | 0      | 0      | 0.26   | 0.13   | 0      | 1.83   | 2.36   |
| 2-3.c1223/82/2519   | lamin B1 [Xenopus (Silurana     | 89272234      | CAJ83381.1  | 0.36   | 0      | 0.4    | 0         | 3.05   | 1.8    | 0      | 0      | 0.01   | 0      | 0      |
| 1-2.c29009/1/3551   | --                              | --            | --          | 104.16 | 72.86  | 107.8  | 147.94    | 347.64 | 937.79 | 393.23 | 172.88 | 442.49 | 30.11  | 22.65  |
| 2-3.c50127/1/2236   | --                              | --            | --          | 0.97   | 14.9   | 0.93   | 1.23      | 1.13   | 5.82   | 3.67   | 0.63   | 1.86   | 56.7   | 42.15  |
| 1-2.c34000/1/5930   | PREDICTED: sarcalumenin i       | 847166841     | XP_01282670 | 2.47   | 1.28   | 4.03   | 3.63      | 7.46   | 2.07   | 3.26   | 4.48   | 4.04   | 0      | 1.24   |
| 2-3.c32678/1/2482   | PREDICTED: protein tyrosin      | 149638430     | XP_00150670 | 20.62  | 10.19  | 15.06  | 17.48     | 12.94  | 4.47   | 5.36   | 9.25   | 9.72   | 0.31   | 0      |
| 2-3.c34714/1/1985   | --                              | --            | --          | 0      | 0      | 0      | 0         | 0      | 0      | 0      | 1.77   | 0.73   | 20.59  | 14.3   |
| 1-2.c12734/5/1417   | PREDICTED: histone deacet       | 557268092     | XP_00601941 | 2.63   | 25.51  | 1.48   | 0.99      | 0      | 1.6    | 3.22   | 1.9    | 0.57   | 16.38  | 19.49  |
| 2-3.c48237/1/2174   | phosphoglucomutase-1 [Xenc      | 47575814      | NP_00100125 | 0      | 1.3    | 0      | 0         | 26.44  | 8.89   | 21.86  | 28.96  | 0      | 0      | 0      |
| 1-2.c45042/1/1418   | PREDICTED: LOW QUALI            | 637377851     | XP_00812323 | 42.85  | 28.37  | 81.25  | 74.05     | 92.76  | 42.63  | 18.57  | 52.87  | 153.4  | 4.91   | 2.15   |
| 1-2.c43448/1/1398   | PREDICTED: uncharacterize       | 512834006     | XP_00491352 | 8.84   | 0.83   | 78.02  | 3.58      | 39.72  | 31.9   | 21.64  | 31.09  | 7.44   | 0      | 1.55   |
| 2-3.c23886/1/2264   | --                              | --            | --          | 0.52   | 20.42  | 0.7    | 0.95      | 0.3    | 3.32   | 2.75   | 0.68   | 0.95   | 22.78  | 21.55  |
| 1-2.c33214/2/1561   | PREDICTED: isocitrate dehy      | 847172685     | XP_01280957 | 28.6   | 7.93   | 40.67  | 16.32     | 43.93  | 20.34  | 26.52  | 38.05  | 30.32  | 8.03   | 5.96   |
| 2-3.c17501/1/2025   | --                              | --            | --          | 3.13   | 0      | 0.66   | 1.57      | 0      | 1.42   | 11.19  | 9.37   | 2.4    | 32.69  | 34.83  |
| 3-6.c3539/3/3225    | PREDICTED: uveal autoantiq      | 512827341     | XP_00491264 | 61.02  | 72.58  | 108.73 | 94.4      | 90.46  | 94.24  | 47.15  | 58.14  | 92.57  | 16.58  | 20.85  |
| 2-3.c26092/1/2252   | deoxyribonuclease II, lysosor   | 147904975     | NP_00108667 | 4.83   | 1      | 2.76   | 4.55      | 3.77   | 0.68   | 3.05   | 4.62   | 4.06   | 44.34  | 66.8   |
| 2-3.c52164/1/2212   | PREDICTED: phosphoribosy        | 847162833     | XP_01282564 | 5.7    | 14.98  | 2.53   | 4.14      | 1.99   | 2.79   | 7.02   | 3.95   | 7.47   | 27.13  | 41.43  |
| 1-2.e19896/1/1318   | PREDICTED: cathepsin F [E       | 742212064     | XP_01089668 | 13.42  | 0.01   | 0      | 0         | 0      | 0      | 0      | 9.5    | 3.97   | 9.44   | 0.15   |
| 1-2.c4874/5/1366    | HLA class II histocompatibili   | 308193352     | NP_00118403 | 8.5    | 5      | 7.11   | 5.03      | 7.23   | 4.24   | 3.45   | 2.94   | 1.4    | 0      | 0.51   |
| 3-6.c13269/1/7498.: | --                              | --            | --          | 26.07  | 9.03   | 0.1    | 0.28      | 5.41   | 3.4    | 23.92  | 13.07  | 6.69   | 40.48  | 55.62  |
| 1-2.c21935/5/1755   | transglutaminase 2 (C polype    | 147903280     | NP_00108541 | 0.94   | 0      | 0      | 0.51      | 0      | 0      | 0      | 0      | 0.61   | 8.94   | 7.07   |
| 3-6.e14296/1/2681   | 15 kDa selenoprotein precurs    | 30231240      | NP_840079.1 | 0      | 5.29   | 0.63   | 0.16      | 2.23   | 5.91   | 0      | 0.09   | 0.52   | 0      | 0      |
| 1-2.c13946/9/1454   | PREDICTED: LOW QUALI            | 803125841     | XP_00401312 | 8.33   | 5.65   | 12.27  | 10.56     | 17.32  | 8.51   | 10.08  | 10.03  | 7.3    | 2.97   | 0.64   |
| 1-2.e17753/1/1235   | hypothetical protein [Plasmoc   | 156094450     | XP_00161326 | 12.75  | 1.88   | 9.11   | 13.22     | 16.42  | 6.93   | 19.46  | 10.94  | 22.11  | 3.04   | 2.31   |
| 2-3.c16433/1/8592   | transcription factor IIIB 90 kl | 307344666     | NP_00118255 | 0.49   | 1.55   | 0      | 0.65      | 0.92   | 1.07   | 0.35   | 0      | 0.19   | 0      | 0      |
| 3-6.c7352/1/2719    | --                              | --            | --          | 1.68   | 18.76  | 7.31   | 9.39      | 10.42  | 41.14  | 6.72   | 2.88   | 6.36   | 0.25   | 0      |

|                    |                                 |           |             |        |        |        |        |        |        |        |        |        |        |        |        |   |   |
|--------------------|---------------------------------|-----------|-------------|--------|--------|--------|--------|--------|--------|--------|--------|--------|--------|--------|--------|---|---|
| 2-3.c2293/6/2187   | PREDICTED: acyl-coenzym         | 512837953 | XP_00491407 | 0      | 0      | 3.52   | 0      | 2.07   | 1.5    | 0      | 0      | 0      | 0      | 0      | 0      | 0 | 0 |
| 1-2.c32774/1/1421  | PREDICTED: transmembran         | 612054824 | XP_00750467 | 233.12 | 88.91  | 175.32 | 114.19 | 195.12 | 32.43  | 70.69  | 273.67 | 94.52  | 10.23  | 6.91   | 8.93   |   |   |
| 2-3.c3712/2/2280   | glyceraldehyde-3-phosphate      | 300679438 | ADK27487.1  | 1.37   | 0      | 11.78  | 8.9    | 13.34  | 3.84   | 1.35   | 2.4    | 8.14   | 2.32   | 2.62   | 0.78   |   |   |
| 2-3.c45390/3/2360  | Fos-related antigen-2 [Xenop    | 213626733 | AAI69992.1  | 11.94  | 31.38  | 2.1    | 5.24   | 3.11   | 1.84   | 17.47  | 11.48  | 3.97   | 51.83  | 57.02  | 64.05  |   |   |
| 3-6.c4836/1/2998   | PREDICTED: polypyrimidin        | 847118922 | XP_01281677 | 0      | 6.03   | 0.99   | 0.59   | 0.3    | 1.07   | 0      | 0      | 0      | 0      | 0      | 0      | 0 | 0 |
| 1-2.c15790/2/1471  | FXVD domain-containing ior      | 226372508 | ACO51879.1  | 30.88  | 20.68  | 26     | 33.18  | 27.58  | 28.14  | 46.25  | 28.42  | 24.38  | 251.38 | 598.27 | 416.93 |   |   |
| 2-3.c15842/1/3437  | --                              | --        | --          | 8.64   | 4.87   | 2.72   | 8.53   | 4.87   | 2.11   | 10.12  | 10.84  | 9.5    | 80.87  | 92.51  | 87.23  |   |   |
| 1-2.c34792/1/1524  | PREDICTED: titin [Strongyl      | 780140340 | XP_01168055 | 0.94   | 0.82   | 1.75   | 4.17   | 2.35   | 3.88   | 1.91   | 2.15   | 1.45   | 0      | 0.38   | 0      |   |   |
| 2-3.c16370/4/1979  | protein kinase C and casein k   | 194018590 | NP_00112338 | 1.45   | 3.01   | 0.41   | 0.65   | 1.29   | 1.09   | 0      | 0      | 0      | 0      | 0      | 0      |   |   |
| 3-6.c18349/1/3028  | PREDICTED: bifunctional gl      | 512844004 | XP_00293606 | 10.96  | 13.08  | 9.53   | 6.74   | 7.67   | 16.62  | 6.56   | 8.18   | 13.17  | 2.33   | 2.02   | 2.21   |   |   |
| 3-6.c4952/1/3593.1 | --                              | --        | --          | 0.09   | 1.11   | 0.96   | 0.39   | 0.68   | 1.59   | 0.62   | 0.83   | 1.87   | 0      | 0      | 0      |   |   |
| 2-3.c29736/1/2669  | PREDICTED: cullin-2 [Zono       | 542142665 | XP_00548043 | 5.21   | 8.47   | 3.74   | 4.56   | 6.56   | 8.43   | 3.86   | 2.99   | 3.44   | 1.4    | 0.2    | 1.86   |   |   |
| 3-6.c15968/1/2729  | uncharacterized protein LOC     | 163915221 | NP_00110658 | 2.29   | 0.65   | 1.27   | 0.93   | 2.5    | 0.46   | 0.83   | 2.07   | 1.3    | 0      | 0      | 0.06   |   |   |
| 3-6.c8242/2/3196   | epithelial membrane protein :   | 58331827  | NP_00101111 | 5.58   | 21.82  | 3.66   | 4.64   | 5.99   | 6.1    | 1.24   | 5.42   | 2.7    | 1.75   | 0.24   | 1.13   |   |   |
| 1-2.c19804/2/1648  | transforming growth factor-bi   | 118403632 | NP_00107232 | 0      | 12.75  | 0      | 5.63   | 0      | 3.17   | 4.04   | 0      | 0.2    | 0      | 0      | 0      |   |   |
| 1-2.c26063/3/1878  | Uncharacterized protein B04f    | 677429359 | KKF30293.1  | 1.38   | 0      | 0.74   | 0.94   | 1.22   | 0.26   | 3.94   | 0.49   | 0.7    | 15.64  | 25.05  | 8.65   |   |   |
| 2-3.c6442/12/1923  | phosphatidylethanolamine bir    | 148232176 | NP_00108562 | 17.54  | 54.45  | 33.84  | 15.45  | 26.28  | 65.03  | 17.98  | 21.42  | 28.85  | 6.7    | 0.87   | 3.29   |   |   |
| 1-2.c18013/1/1256  | regulator of G-protein signal   | 187608191 | NP_00112012 | 0      | 0      | 0      | 0      | 0      | 0      | 0      | 0      | 0      | 12.74  | 7.54   | 0      |   |   |
| 2-3.c59331/1/2215  | PREDICTED: lysosome men         | 696995434 | XP_00956446 | 1.63   | 0.12   | 1.23   | 0.16   | 0.48   | 0.64   | 2.7    | 1.52   | 0.19   | 11.2   | 4.73   | 11.42  |   |   |
| 2-3.c9807/1/2350.2 | PREDICTED: NFU1 iron-sul        | 847146530 | XP_01282218 | 32.06  | 17.62  | 28.88  | 26.68  | 27.69  | 19.55  | 14.24  | 20.03  | 20.61  | 2.87   | 3.13   | 8.65   |   |   |
| 1-2.c12399/5/1501  | LOC397919 protein [Xenopu       | 213625217 | AAI70091.1  | 40.06  | 175.82 | 28.96  | 25.94  | 40.33  | 83.15  | 46.22  | 32.15  | 42.3   | 12.16  | 7.34   | 14.18  |   |   |
| 2-3.c21324/1/2288  | RNA-directed DNA polymeri       | 808880956 | KKF28667.1  | 5.58   | 7.48   | 1.77   | 3.36   | 1.66   | 1.75   | 6.58   | 6.03   | 3.65   | 38.23  | 46.06  | 27.81  |   |   |
| 2-3.c30193/1/2397  | PREDICTED: alpha-2,8-sialy      | 847084430 | XP_01281233 | 1.16   | 2.51   | 2.97   | 2.06   | 2.89   | 8.09   | 3.08   | 1.78   | 1.6    | 0.43   | 0.93   | 0      |   |   |
| 1-2.c12399/1/1906  | PREDICTED: myomesin-2 is        | 847130012 | XP_01281893 | 49.98  | 26     | 61.74  | 102.29 | 83.65  | 146.16 | 101.18 | 91.02  | 106.89 | 39.84  | 19.79  | 22.91  |   |   |
| 2-3.c24276/1/2130  | 3-hydroxyisobutyrate dehydr     | 71896099  | NP_00102560 | 0      | 2.64   | 0.25   | 0      | 2.64   | 6.44   | 0      | 0      | 0      | 0      | 0      | 0      |   |   |
| 1-2.c32903/1/1219  | calsequestrin 1 (fast-twitch, s | 148231736 | NP_00108022 | 16.18  | 1.9    | 29.47  | 23.57  | 31.76  | 23.82  | 17.38  | 26.81  | 25.87  | 4.65   | 3.69   | 8.36   |   |   |
| 2-3.c38624/8/2139  | aspartyl/asparaginyl beta-hyd   | 62751990  | NP_00101573 | 1.64   | 0.67   | 2.31   | 2.27   | 3.29   | 5.41   | 2.19   | 2.64   | 1.56   | 0.55   | 0      | 0.73   |   |   |
| 1-2.c1792/30/1431  | PREDICTED: enoyl-CoA del        | 847134418 | XP_01281985 | 21.26  | 30.75  | 16.21  | 18.39  | 23.83  | 24.66  | 10.1   | 18.16  | 20.4   | 5.62   | 2.36   | 5.81   |   |   |
| 1-2.c22076/1/1323  | kunitz-type protease inhibitor  | 113931260 | NP_00103907 | 16     | 9.39   | 14.59  | 9.93   | 3.59   | 3.52   | 30.21  | 12.97  | 18.01  | 71.86  | 85.77  | 96.99  |   |   |
| 1-2.c2779/14/1330  | fast troponin I [Rana catesbei  | 58397794  | AAW73073.1  | 102.06 | 116.9  | 127.46 | 138.92 | 158.09 | 419.76 | 316.99 | 104.09 | 167.07 | 21.76  | 78.39  | 37.81  |   |   |
| 2-3.c16882/2/1922  | PREDICTED: uncharacterize       | 768943650 | XP_01161148 | 1.2    | 2.79   | 1.04   | 0.79   | 2.64   | 6.18   | 0.47   | 1.21   | 0.23   | 0      | 0      | 0.26   |   |   |
| 1-2.c17307/1/1378  | PREDICTED: creatine kinas       | 126344225 | XP_00136422 | 31.55  | 6.01   | 67.12  | 427.38 | 625.19 | 231.04 | 37.92  | 33.41  | 776.82 | 144.75 | 155.44 | 59.02  |   |   |
| 2-3.c26211/1/2402  | --                              | --        | --          | 10.79  | 9.45   | 2.69   | 4.59   | 4.73   | 2.41   | 20.75  | 13.29  | 10.71  | 49.4   | 52.01  | 92.38  |   |   |
| 2-3.c58065/6/2127  | calsequestrin 1 (fast-twitch, s | 148231736 | NP_00108022 | 22.51  | 4.82   | 39.83  | 34.2   | 39.47  | 30.27  | 24.63  | 33.45  | 29.95  | 8.7    | 7.08   | 9.43   |   |   |
| 2-3.c33251/1/2219  | --                              | --        | --          | 0.35   | 5.71   | 0      | 2.56   | 0      | 1.59   | 2.96   | 0      | 3.93   | 33.7   | 38.23  | 23.96  |   |   |
| 1-2.c26192/1/1561  | aconitase 2, mitochondrial [X   | 147904130 | NP_00108626 | 101.2  | 30.48  | 85.55  | 81.47  | 97.68  | 56.58  | 63.59  | 74.63  | 65.8   | 12.21  | 13.88  | 30.05  |   |   |
| 2-3.c46682/1/2358  | --                              | --        | --          | 2.73   | 25.58  | 3.19   | 3.42   | 3.84   | 6.65   | 12.01  | 3.04   | 2.34   | 75.39  | 90.4   | 49.45  |   |   |
| 2-3.c59547/1/2155  | PREDICTED: sodium-indepe        | 512873189 | XP_00293735 | 1.01   | 0      | 0      | 0      | 0      | 0      | 0      | 0      | 0      | 0.87   | 1.57   | 2.96   |   |   |
| 2-3.c32641/1/2664  | PREDICTED: keratin, type II     | 795536447 | XP_01190357 | 66.36  | 0      | 0      | 0      | 20.06  | 12.89  | 0      | 0      | 0      | 0      | 0      | 0      |   |   |
| 3-6.c13040/2/3940  | LIM domain-binding protein      | 45360839  | NP_989095.1 | 1.9    | 5.77   | 25.92  | 9.41   | 19.94  | 52.07  | 18.31  | 9.54   | 13.54  | 0.74   | 0      | 3.2    |   |   |
| 1-2.c20205/1/1455  | WD repeat and SOCS box-co       | 45361625  | NP_989387.1 | 1.57   | 4.36   | 2.99   | 2.91   | 0      | 2.26   | 3.01   | 0      | 0      | 0      | 0      | 0      |   |   |
| 2-3.c55486/1/2083  | PREDICTED: exostosin-like       | 530594220 | XP_00529065 | 1.17   | 7.11   | 2.42   | 1.85   | 1.41   | 5.57   | 1.63   | 2.71   | 1.58   | 0.55   | 0      | 0.06   |   |   |
| 1-2.c47974/155/184 | PREDICTED: LOW QUALI            | 803125841 | XP_00401312 | 184.31 | 21.18  | 217.06 | 218.65 | 232.95 | 122.08 | 224.11 | 120.36 | 8.72   | 108.85 | 29.65  | 16.94  |   |   |
| 1-2.c44450/1/1420  | --                              | --        | --          | 0      | 15.14  | 0      | 0.87   | 0      | 0      | 3.09   | 0      | 26.78  | 32.06  | 2.98   |        |   |   |
| 1-2.c11766/1/1259  | THUMP domain-containing p       | 45360771  | NP_989059.1 | 2.5    | 12.34  | 2.22   | 2.32   | 4.28   | 7.51   | 3.68   | 1.72   | 1.08   | 0.6    | 0.18   | 0.38   |   |   |
| 2-3.c35127/1/2286  | PREDICTED: sarcalumenin i       | 733909809 | XP_01071766 | 0      | 0      | 6.22   | 6.63   | 5.97   | 3.26   | 4.6    | 7.66   | 3.03   | 0.98   | 0      | 0.97   |   |   |
| 2-3.c3861/2/2061   | --                              | --        | --          | 23.42  | 0.56   | 17.53  | 10.51  | 26.46  | 23.38  | 14.13  | 15.98  | 0      | 0      | 3.46   | 9.45   |   |   |
| 2-3.c8610/1/2391   | --                              | --        | --          | 79.78  | 4.79   | 20.34  | 37.55  | 42.56  | 10.22  | 35.14  | 19.06  | 29.5   | 4.7    | 8.29   | 4.8    |   |   |
| 2-3.c16487/7/2622  | wdr18-prov protein, partial [2  | 56971199  | AAH88047.1  | 5.58   | 23.55  | 3.04   | 3.59   | 5.6    | 8.32   | 3.93   | 2.56   | 3.43   | 0.48   | 1.1    | 1.57   |   |   |
| 1-2.c13606/1/1310  | MGC82089 protein [Xenopus       | 51950276  | AAH82410.1  | 5.49   | 4.35   | 0.15   | 2.86   | 0      | 1.4    | 3.57   | 6.49   | 7.76   | 27.24  | 21.4   | 28.79  |   |   |
| 2-3.c8841/1/10846  | propionyl CoA carboxylase, c    | 148227451 | NP_00108925 | 0.97   | 0      | 0      | 0      | 0      | 0      | 2.14   | 0.67   | 1.87   | 5.99   | 2.54   | 3.59   |   |   |
| 2-3.c46002/4/2152  | PREDICTED: diacylglycerol       | 301610039 | XP_00293457 | 1.28   | 0      | 0      | 0.11   | 0      | 0      | 0      | 0.6    | 0.91   | 1.95   | 4.42   | 2.79   |   |   |
| 2-3.c53771/1/2303  | TC1-like transposase [Cyprin    | 357575246 | AET85182.1  | 0      | 0      | 0.11   | 0.59   | 0      | 1      | 2.31   | 0      | 0.48   | 8.71   | 12.35  | 9.51   |   |   |
| 2-3.c5157/1/2333.1 | --                              | --        | --          | 2.09   | 0      | 1.96   | 1.94   | 0      | 3.8    | 5.25   | 8.67   | 7.96   | 21.85  | 53.62  | 23.93  |   |   |
| 2-3.c13762/1/2290  | transposase [Rana pipiens]>g    | 37678182  | AAP49009.1  | 0.86   | 0      | 0      | 0.2    | 0.15   | 0      | 2.33   | 0      | 2.05   | 6.57   | 13.95  | 3.05   |   |   |
| 2-3.c1327/46/2417  | myc proto-oncogene protein [    | 45361629  | NP_989390.1 | 29.24  | 33.3   | 18.74  | 17.46  | 18.09  | 21.8   | 27.06  | 17.78  | 28.92  | 7.28   | 2.66   | 3.46   |   |   |
| 1-2.c26161/1/1443  | --                              | --        | --          | 0      | 0      | 0      | 0      | 0      | 0      | 0      | 0      | 0      | 16.66  | 39.59  | 3.01   |   |   |
| 1-2.c6864/1/1165   | Tubulin alpha-1C chain [Lari    | 808859777 | KKF11870.1  | 1.4    | 63.83  | 0      | 2.51   | 0      | 19.34  | 33     | 26.08  | 8.17   | 121.78 | 76.54  | 90.56  |   |   |

|                    |                                 |           |             |        |        |         |        |        |         |         |         |        |        |        |        |
|--------------------|---------------------------------|-----------|-------------|--------|--------|---------|--------|--------|---------|---------|---------|--------|--------|--------|--------|
| 2-3.c46474/1/2345  | TFIIH basal transcription fact  | 56118508  | NP_00100813 | 3.97   | 7.53   | 0.07    | 0      | 0      | 0.1     | 2.96    | 0       | 0      | 6.81   | 8.45   | 0.19   |
| 1-2.e26277/3/1463  | mindbomb E3 ubiquitin prote     | 189217792 | NP_00112133 | 0      | 2.39   | 0.41    | 1.97   | 0      | 1.29    | 1.75    | 2.69    | 0      | 35.3   | 24.35  | 8.51   |
| 2-3.e52334/1/2434  | --                              | --        | --          | 3.09   | 1.46   | 1.84    | 2.74   | 1.18   | 1.49    | 4.55    | 1.19    | 3.47   | 36.36  | 54.01  | 20.23  |
| 1-2.c19078/1/1665  | --                              | --        | --          | 3.48   | 1.41   | 1.32    | 6.8    | 1.39   | 0.92    | 4.97    | 4.18    | 1.3    | 46.71  | 36.12  | 56.39  |
| 2-3.c32369/1/2639  | PREDICTED: clathrin interac     | 301620587 | XP_00293964 | 1.15   | 0.48   | 0.37    | 1.29   | 0      | 0       | 4.1     | 0.46    | 0      | 20.22  | 24.92  | 4.31   |
| 1-2.c33573/1/1443  | PREDICTED: TSC2 domai           | 847153187 | XP_01282344 | 2.83   | 0      | 0       | 1.08   | 0      | 0       | 0.69    | 0       | 0      | 114.9  | 193.73 | 0      |
| 2-3.c57097/2/2045  | PREDICTED: myosin-4 [Xer        | 847156920 | XP_01282446 | 2.18   | 0      | 24.01   | 15.79  | 14.21  | 0.09    | 26.7    | 11.89   | 14.53  | 0.33   | 0.68   | 0      |
| 2-3.c59991/1/2138  | PREDICTED: ataxin-3 isofor      | 847154356 | XP_01282385 | 0      | 1.05   | 0.36    | 0.71   | 1.48   | 0.45    | 0.38    | 0.87    | 0      | 0      | 0      | 0      |
| 2-3.c15409/1/2262  | PREDICTED: exocyst compl        | 558179412 | XP_00612692 | 0      | 0.2    | 0.21    | 0.04   | 0      | 0       | 0.86    | 0       | 0.29   | 2.73   | 2.49   | 1.16   |
| 2-3.c33480/1/2145  | PREDICTED: integral memb        | 695151462 | XP_00950344 | 2.54   | 9.26   | 0       | 0      | 0      | 0       | 6.76    | 0       | 0      | 8.83   | 4.41   | 0      |
| 2-3.c45677/1/2334  | vigilin [Xenopus (Silurana) tr  | 55742112  | NP_00100685 | 56.31  | 58.93  | 73.99   | 50.11  | 57.72  | 43.45   | 54.01   | 66.35   | 47.85  | 1.68   | 1.6    | 30.19  |
| 1-2.c34794/1/6686  | Actin, alpha cardiac muscle 1   | 440908718 | ELR58708.1  | 12.77  | 1.19   | 56.79   | 20.18  | 25.3   | 37.31   | 62.26   | 60.34   | 38.16  | 8.75   | 6.52   | 4.01   |
| 2-3.c22719/1/2715  | electron transfer flavoprotein- | 54020771  | NP_00100563 | 5.13   | 0.82   | 4.27    | 11.24  | 7.63   | 3.45    | 1.44    | 5.89    | 1.26   | 3.49   | 0.79   | 0.56   |
| 1-2.c48560/1/1269  | PREDICTED: spermatid peri       | 471370382 | XP_00437570 | 0.48   | 0      | 0       | 1.15   | 0      | 0       | 1.33    | 2.01    | 4.2    | 10.23  | 7.35   | 16.18  |
| 2-3.c38835/1/2382  | --                              | --        | --          | 4.83   | 4.95   | 8.47    | 4.19   | 9.44   | 9.68    | 5.97    | 3.3     | 6.4    | 1.84   | 0.22   | 2.3    |
| 2-3.c47937/1/2574  | predicted protein [Nematostel   | 156353049 | XP_00162285 | 4.99   | 8.87   | 0.7     | 2.44   | 2.48   | 2.34    | 1.91    | 3.54    | 4.51   | 35.03  | 56.86  | 36.98  |
| 3-6.e15531/1/11745 | myosin heavy chain, partial [I  | 4249701   | AAD13772.1  | 0.67   | 0      | 7.17    | 4.06   | 3.6    | 0       | 3.7     | 2.34    | 4.2    | 0      | 0      | 0.13   |
| 3-6.e6427/1/3121   | Ribosome-binding protein 1 [    | 449268937 | EMC79765.1  | 3.97   | 0.23   | 1.92    | 2.23   | 5.59   | 1.02    | 2.17    | 1.47    | 1.03   | 0      | 0      | 0.25   |
| 3-6.e6672/1/3709.1 | PREDICTED: atrial natriuret     | 512816528 | XP_00491126 | 0.48   | 7.96   | 1.1     | 0.59   | 0.78   | 2.17    | 0       | 0.46    | 0.66   | 0.15   | 0      | 0      |
| 2-3.c29586/1/2080  | ORF2 [Acanthochelys spixii]     | 6576738   | BAA88337.1  | 2.4    | 12.33  | 2.27    | 1.85   | 2.43   | 6.88    | 10.6    | 2.44    | 3.8    | 60.71  | 75.92  | 66.05  |
| 2-3.c61430/1/1892  | alpha 1 type I collagen [Rana   | 3242649   | BAA29028.1  | 0      | 5.8    | 1.19    | 0.74   | 0.67   | 3.68    | 0.78    | 0       | 0.64   | 0      | 0      | 0      |
| 2-3.c38140/63/2537 | arrestin domain-containing pr   | 118404458 | NP_00107265 | 8.3    | 10.68  | 0.79    | 4.68   | 1.28   | 1.06    | 9.38    | 9.91    | 5.07   | 18.95  | 38.74  | 46.36  |
| 2-3.c54016/1/2486  | PREDICTED: 5'-nucleotidase      | 768395961 | XP_01159374 | 7.67   | 5.81   | 9.38    | 9.69   | 7.57   | 10.28   | 9.38    | 6.76    | 11.76  | 0.33   | 0.76   | 4.11   |
| 1-2.e27330/3/1729  | PREDICTED: N-lysine meth        | 573875669 | XP_00662614 | 32.44  | 5.96   | 35.8    | 24.2   | 17.45  | 13.96   | 25.55   | 29.46   | 24.41  | 2.32   | 5.99   | 4.49   |
| 1-2.c43885/1/1689  | --                              | --        | --          | 4.07   | 1.92   | 3.83    | 2.41   | 3.12   | 5.14    | 4.61    | 4.98    | 2.72   | 0      | 0.15   | 0.85   |
| 2-3.c42257/1/1873  | PREDICTED: phosphoglucosyl      | 847117435 | XP_01281625 | 32.3   | 9.26   | 56.87   | 20.52  | 13.73  | 30.94   | 20.59   | 4.09    | 41.34  | 2.56   | 9.08   | 3.89   |
| 2-3.c34539/1/2618  | tyrosine aminotransferase [X    | 55742474  | NP_00100675 | 3.38   | 0.81   | 1.65    | 1.83   | 1.46   | 1.4     | 16.02   | 1.78    | 1.73   | 0      | 0.39   | 0      |
| 1-2.e25284/1/4147  | Malate dehydrogenase, cytop     | 226372118 | ACO51684.1  | 38.8   | 59.23  | 74.13   | 81.7   | 42.25  | 75.29   | 81.5    | 61.83   | 82.91  | 16.92  | 23.42  | 10.74  |
| 1-2.c34646/1/1313  | --                              | --        | --          | 0.12   | 0.46   | 0       | 0      | 0      | 0       | 0.29    | 1.1     | 4.55   | 6.16   | 0.04   | 0.01   |
| 1-2.c39392/1/1756  | myosin X [Xenopus (Silurana)    | 89268944  | CAJ81959.1  | 2.64   | 7.5    | 2.36    | 2.59   | 1.73   | 5.82    | 3.26    | 2.76    | 5.76   | 47.78  | 42.55  | 53.21  |
| 1-2.c19142/1/1395  | actin, alpha skeletal muscle B  | 820145793 | KKX13565.1  | 581.72 | 105.55 | 1907.31 | 857.22 | 669.37 | 1164.74 | 2158.99 | 2149.94 | 1054.1 | 241.11 | 237.52 | 223.89 |
| 1-2.e23118/1/1751  | PREDICTED: uncharacterize       | 847137252 | XP_01282064 | 4.97   | 8.03   | 1.66    | 3.56   | 2.19   | 1.81    | 2.1     | 2.74    | 4.97   | 18.13  | 58.54  | 43.03  |
| 2-3.c35240/1/2155  | low density lipoprotein recep   | 148225746 | NP_00108256 | 0      | 0      | 0       | 0      | 0      | 0       | 1.77    | 0       | 0      | 3.29   | 0.5    | 1.65   |
| 1-2.c10976/1/1595  | activating transcription factor | 147902692 | NP_00108695 | 9.64   | 20.1   | 6.95    | 11.9   | 7.49   | 4.79    | 1.14    | 2.47    | 1.87   | 0      | 2.42   | 1.92   |
| 1-2.e13781/1/1613  | PREDICTED: nesprin-2 isofor     | 847157071 | XP_01282445 | 14.14  | 11.79  | 6.31    | 8.83   | 7.86   | 4.19    | 12.36   | 8.98    | 8.72   | 82.99  | 110.01 | 107    |
| 2-3.c48517/1/1908  | PREDICTED: titin-like [Chel     | 591350793 | XP_00706984 | 0      | 0      | 0       | 1.43   | 0      | 1.73    | 0.27    | 0.14    | 0      | 0      | 0      | 0      |
| 1-2.c18270/1/1323  | keratin 14, type I [Xenopus la  | 262050515 | NP_00115991 | 78.46  | 15.52  | 97.89   | 62.69  | 34.51  | 1.17    | 29.39   | 71.05   | 35.87  | 1.17   | 0      | 0      |
| 2-3.c36046/3/2226  | PREDICTED: non-canonical        | 512834531 | XP_00293741 | 0.82   | 8.44   | 2.34    | 2.42   | 2.09   | 4.48    | 1.76    | 1.79    | 2.75   | 0.32   | 0.35   | 0.38   |
| 2-3.c26540/1/2476  | GH17572 [Drosophila mojav       | 195116485 | XP_00200278 | 0.16   | 60.38  | 20.95   | 13.63  | 19.85  | 33.5    | 7.42    | 17.62   | 0      | 0      | 3.34   | 11.16  |
| 2-3.c3284/1/2142   | PREDICTED: ectonucleotide       | 847130990 | XP_01281912 | 3.03   | 14.81  | 0.8     | 2.98   | 2.13   | 4.17    | 1.42    | 1.77    | 3.07   | 44.01  | 50.12  | 40.2   |
| 1-2.e25258/1/1493  | --                              | --        | --          | 0.85   | 0      | 1.34    | 1.5    | 0.37   | 0       | 0       | 0       | 1.87   | 21.67  | 8.73   | 11.18  |
| 1-2.c33032/1/1342  | NPL4 homolog, ubiquitin rec     | 147898562 | NP_00108042 | 0      | 6.86   | 0.56    | 5.65   | 0.86   | 6.36    | 21.64   | 1.3     | 11.45  | 68.59  | 84.63  | 36.47  |
| 2-3.c2106/43/2489  | MGC83764 protein [Xenopus       | 148237259 | NP_00108656 | 2.64   | 12.3   | 3.18    | 2.4    | 3.55   | 3.44    | 1.28    | 1.87    | 1.47   | 0.68   | 0      | 0.56   |
| 1-2.e20637/1/1516  | --                              | --        | --          | 1.47   | 0      | 0       | 2.24   | 0.33   | 0.39    | 2.14    | 1.25    | 4.64   | 17.59  | 28.29  | 12.84  |
| 2-3.c47226/1/1917  | tripeptidyl-peptidase 1 precur  | 156717508 | NP_00109625 | 0      | 0      | 0       | 0      | 0      | 0.05    | 8.46    | 0       | 0      | 46.6   | 17.07  | 0.09   |
| 1-2.c13011/1/1207  | BCL2-like 1 [Xenopus (Silur     | 53749666  | NP_00100542 | 0.33   | 0.94   | 0.87    | 0      | 0.25   | 0       | 0       | 0       | 0      | 8.66   | 7.7    | 3.74   |
| 1-2.c39771/1/1345  | serpin peptidase inhibitor, cla | 56118698  | NP_00100793 | 0      | 2.11   | 1.2     | 0.47   | 0      | 0       | 2.19    | 0       | 1.82   | 1.76   | 8.1    | 11.71  |
| 1-2.c43400/1/1608  | LOC494840 protein [Xenopus      | 83318459  | AAI08848.1  | 0      | 11.31  | 0.16    | 0      | 0      | 0       | 7.58    | 0       | 0.08   | 14.39  | 38.71  | 0      |
| 2-3.c18940/1/2571  | PREDICTED: vacuolar prote       | 847157353 | XP_01282453 | 1.55   | 0.27   | 0       | 0      | 0      | 0       | 0.86    | 0       | 0      | 7.03   | 9.02   | 0      |
| 2-3.c27201/1/2774  | CCR4-NOT transcription con      | 148228213 | NP_00109065 | 1.48   | 5      | 3.72    | 0      | 0      | 0       | 1.37    | 0       | 0      | 0.31   | 4.62   | 15.06  |
| 2-3.c15206/1/2410  | PREDICTED: myosin-4 [Xer        | 847156920 | XP_01282446 | 0.36   | 0.08   | 1.93    | 1.22   | 2.14   | 0       | 1.42    | 2.16    | 1.84   | 0      | 0      | 0      |
| 2-3.c20244/1/2388  | --                              | --        | --          | 10.71  | 7.42   | 11.31   | 15.07  | 8.03   | 20.05   | 15.95   | 6.92    | 15.12  | 3.63   | 4.63   | 1.89   |
| 2-3.c59393/1/1897  | PREDICTED: tyrosine-protei      | 847087706 | XP_01281833 | 0.46   | 6.45   | 0.53    | 3.57   | 4.01   | 4.46    | 0.24    | 2.15    | 0      | 0.55   | 0      | 0.89   |
| 2-3.c30924/2/1922  | ATP-dependent RNA helicase      | 565321822 | ETE72588.1  | 44.37  | 34.08  | 11.38   | 23.83  | 22.35  | 23.15   | 9.97    | 11.47   | 0.46   | 5.09   | 7.97   | 4.11   |
| 1-2.c24128/4/1485  | --                              | --        | --          | 54.97  | 7.59   | 8.9     | 29.62  | 9.93   | 5.88    | 57.57   | 28.34   | 25.66  | 231.11 | 396.87 | 132.17 |
| 2-3.c13982/1/1939  | PREDICTED: keratin, type II     | 698421871 | XP_00981374 | 45.12  | 56.95  | 31.44   | 27.22  | 156.15 | 35.01   | 85.58   | 62.1    | 33.13  | 0.95   | 0      | 0.74   |
| 2-3.c41197/1/2392  | S-adenosyl-L-methionine-def     | 148224710 | NP_00108996 | 0.79   | 2.1    | 0.65    | 1.17   | 1.56   | 2.79    | 1.07    | 0.35    | 0.36   | 0.42   | 0      | 0      |
| 2-3.c54148/1/2398  | --                              | --        | --          | 0.05   | 0      | 0.95    | 0.27   | 0      | 0       | 2.06    | 0       | 0      | 8.04   | 12.77  | 7.53   |

|                    |                                                   |           |             |          |         |          |          |          |          |         |          |          |          |          |          |
|--------------------|---------------------------------------------------|-----------|-------------|----------|---------|----------|----------|----------|----------|---------|----------|----------|----------|----------|----------|
| 1-2.c24309/1/1541  | --                                                | --        | 5.3         | 4.84     | 1.81    | 11.57    | 5.47     | 4.29     | 4.42     | 4.19    | 4.16     | 1.16     | 1.1      | 1.19     |          |
| 3-6.c4733/1/4374   | Dnmt1 protein [Xenopus laevis]                    | 49117032  | AAH72774.1  | 1.19     | 4.56    | 1.38     | 0.87     | 1.81     | 1.87     | 0.43    | 1.13     | 1.14     | 0.08     | 0.08     | 0.36     |
| 1-2.c26359/1/1805  | --                                                | --        | 16.48       | 16.44    | 3.57    | 5.2      | 3.55     | 9.38     | 95.19    | 12.06   | 6.27     | 108.17   | 122.66   | 46.56    |          |
| 1-2.c51460/338/181 | mitochondrial ATP synthase I                      | 148223359 | NP_00108012 | 430.14   | 256.33  | 339.14   | 330.45   | 438.75   | 261.33   | 241.33  | 357.5    | 466.53   | 62.96    | 110.5    | 106.5    |
| 1-2.c14204/1/2470  | --                                                | --        | 29.6        | 38.98    | 77.04   | 49.27    | 102.75   | 362.93   | 59.42    | 39.16   | 130.1    | 2.07     | 5.44     | 1.88     |          |
| 1-2.c52125/1/1442  | lumican precursor [Xenopus laevis]                | 58332414  | NP_00101100 | 3.9      | 1.41    | 5.76     | 5.13     | 2.83     | 4.69     | 2.51    | 3.42     | 0        | 0        | 1.11     |          |
| 1-2.c1667/70/1628  | adenylosuccinate synthetase I                     | 148236946 | NP_00109001 | 636.41   | 147.94  | 569.89   | 592.17   | 566.4    | 169.16   | 470.89  | 528.38   | 658.11   | 124.36   | 51.57    | 134.97   |
| 2-3.c52773/1/4411  | --                                                | --        | 56.36       | 1.7      | 49.9    | 124.85   | 57.43    | 28.56    | 43.36    | 54.87   | 24.69    | 3.28     | 0.46     | 10.63    |          |
| 2-3.c10634/1/2132  | PREDICTED: myb-binding protein 1                  | 512820645 | XP_00491176 | 0.78     | 0       | 0        | 1.59     | 0.36     | 0.74     | 0.21    | 0.21     | 0        | 0        | 0        |          |
| 1-2.c39795/1/1840  | 1-acylglycerol-3-phosphate C                      | 148222154 | NP_00108527 | 0        | 5.36    | 0        | 0        | 0        | 0        | 0       | 0        | 3.04     | 5.69     | 11.22    | 0        |
| 1-2.c50654/3/1755  | X-box binding protein 1 [Xenopus laevis]          | 147905550 | NP_00108052 | 0        | 0       | 0        | 0        | 0        | 0        | 0       | 0        | 0        | 6.43     | 13.19    | 0        |
| 2-3.c20949/1/2254  | --                                                | --        | 0           | 0.02     | 0.3     | 0        | 0        | 2.4      | 0        | 0       | 0        | 0        | 9.5      | 30.32    | 14.86    |
| 2-3.c39072/1/2271  | glutamate oxaloacetate transaminase 1             | 333805525 | BAK26556.1  | 185.99   | 12.49   | 85.66    | 149.97   | 133.44   | 48.73    | 80.73   | 108.79   | 145.87   | 27.74    | 12.86    | 44.61    |
| 2-3.c15003/1/2253  | PREDICTED: vacuolar protein 1                     | 847111178 | XP_01281485 | 0        | 0       | 0        | 0        | 0        | 0        | 0       | 0        | 3        | 0        | 2.34     |          |
| 1-2.c50142/1/1422  | --                                                | --        | 5.55        | 31.59    | 7.05    | 10.33    | 8.12     | 17.16    | 6.45     | 5.1     | 8.31     | 2.52     | 1.83     | 2.3      |          |
| 1-2.c14282/2/1384  | --                                                | --        | 6.84        | 114.67   | 36.41   | 20.53    | 6.8      | 38.34    | 20.53    | 22.53   | 26.93    | 3.93     | 3.13     | 0.82     |          |
| 2-3.c1801/24/2518  | PREDICTED: ATP-binding cassette domain            | 641776196 | XP_00817137 | 2.37     | 3.43    | 0        | 0        | 1.68     | 1.16     | 2.46    | 1.58     | 0.38     | 0        | 0        |          |
| 1-2.c48991/1/1427  | 72 kDa type IV collagenase [Xenopus laevis]       | 148231336 | NP_00108065 | 3.52     | 24.34   | 2.42     | 0        | 0        | 10.02    | 3.38    | 0        | 40.9     | 0        | 15.14    |          |
| 2-3.c52304/1/2352  | spastin [Xenopus laevis]->gij8                    | 148231546 | NP_00108672 | 0.94     | 0       | 0        | 0.55     | 0        | 0        | 3.2     | 2.15     | 1.72     | 5.81     | 5.81     | 4.51     |
| 1-2.c30026/1/1350  | peroxisome proliferator-activated receptor gamma  | 148233022 | NP_00108131 | 1.94     | 2.05    | 2.38     | 1.88     | 2.08     | 0.53     | 1.33    | 2.17     | 2.21     | 0        | 0        |          |
| 1-2.c44744/1/1769  | coenzyme Q-binding protein 1                      | 148235208 | NP_00108658 | 3.56     | 0       | 0        | 0        | 0        | 0        | 0       | 1.8      | 0.51     | 2.91     | 3.01     |          |
| 2-3.c7703/2/2065   | PREDICTED: E3 ubiquitin-protein ligase            | 512842584 | XP_00294018 | 0        | 0.3     | 0        | 0        | 1.16     | 1.71     | 0       | 0        | 0        | 0        | 0        |          |
| 1-2.c7804/7/1612   | POLD3 protein, partial [Xenopus laevis]           | 50415212  | AAH77426.1  | 0        | 0       | 2.31     | 0        | 0        | 0        | 13.27   | 5.88     | 0        | 0.62     | 6.94     | 21.49    |
| 1-2.c13557/1/1455  | --                                                | --        | 0           | 3.08     | 0.48    | 0        | 0.06     | 0.07     | 0.37     | 0       | 0        | 4.6      | 4.96     | 3.28     |          |
| 1-2.c6174/1/1447   | annexin A1 [Xenopus laevis]                       | 147900738 | NP_00108236 | 2.44     | 0       | 0        | 3.17     | 2.08     | 0        | 0       | 0        | 0        | 0        | 0        |          |
| 1-2.c45896/1/1223  | --                                                | --        | 2.85        | 2.59     | 0.55    | 1.17     | 1.51     | 2.81     | 1.43     | 2.75    | 3.65     | 37.28    | 27.23    | 27       |          |
| 2-3.c38158/13/2296 | delta(3,5)-Delta(2,4)-dienoyl-CoA synthase        | 54020920  | NP_00100570 | 1.74     | 8.55    | 0.53     | 1.49     | 0        | 3.04     | 0.58    | 4.34     | 0.89     | 0        | 0        |          |
| 1-2.c2460/5/1468   | GDP dissociation inhibitor 2                      | 148234617 | NP_00108023 | 0        | 0       | 0        | 0        | 0        | 0        | 0       | 0        | 2.44     | 1.16     | 4.7      |          |
| 1-2.c47115/2/1204  | crystallin, lambda 1 [Xenopus laevis]             | 148224534 | NP_00109120 | 0        | 0       | 0        | 7.61     | 0.89     | 0        | 9.38    | 11.3     | 2.87     | 41.36    | 47.92    | 49.33    |
| 2-3.c61869/1/2045  | inner-ear cytochrome oxidase subunit I            | 6980088   | AAF34720.1  | 26.17    | 22.16   | 19.97    | 13.04    | 14.79    | 32.24    | 16.46   | 16.7     | 21.59    | 3.05     | 4.66     | 5.96     |
| 2-3.c21937/1/2475  | --                                                | --        | 0           | 0        | 0       | 0        | 0        | 0        | 0        | 0       | 0        | 8.88     | 12.06    | 0        |          |
| 2-3.c60080/1/2119  | --                                                | --        | 8.58        | 17.01    | 9.56    | 9.99     | 8.15     | 19.35    | 9.86     | 4.07    | 9.18     | 2.78     | 2.91     | 2.46     |          |
| 1-2.c5155/1/1647.2 | --                                                | --        | 7.44        | 13.04    | 4.23    | 6.98     | 4        | 4.43     | 8.41     | 4.52    | 6.04     | 72.25    | 101.19   | 80.33    |          |
| 1-2.c15459/1/1398  | PREDICTED: Down syndrome critical region 1        | 512823845 | XP_00294157 | 0        | 1.17    | 0        | 0        | 0        | 0.69     | 0       | 0        | 2.66     | 1.47     | 5.01     |          |
| 1-2.c30336/1/3382  | Y-box-binding protein 3 [Xenopus laevis]          | 62751871  | NP_00101585 | 1425.6   | 1049.68 | 1531.75  | 1231.93  | 1533.4   | 4096.78  | 1133.39 | 1482.47  | 1301.27  | 399.92   | 195.87   | 454.9    |
| 2-3.c19034/2/2239  | bystin [Xenopus (Silurana) tropicalis]            | 62752053  | NP_00101583 | 2.35     | 3.79    | 0.59     | 1.71     | 0.79     | 3.03     | 1.65    | 1.86     | 1.37     | 0        | 0.44     | 0        |
| 2-3.c30092/1/2403  | hypothetical protein N312_01                      | 676249687 | KFO13559.1  | 1        | 2.68    | 0.77     | 0.59     | 0.77     | 1.85     | 22.87   | 1.04     | 1.2      | 13.49    | 22.23    | 24.51    |
| 2-3.c34905/1/2313  | ORF2 [Acanthochelys spixii]                       | 6576738   | BAA88337.1  | 1.29     | 4.97    | 1.56     | 1.71     | 1.24     | 2.69     | 6.18    | 2.15     | 1.33     | 35.91    | 34.07    | 33.84    |
| 1-2.c34945/2/1665  | tlh2 protein [Xenopus (Silurana) tropicalis]      | 166796755 | AAI59153.1  | 0        | 0       | 0        | 0        | 0        | 0.01     | 4.44    | 0        | 5.62     | 10.67    | 0        |          |
| 1-2.c41072/1/1360  | --                                                | --        | 0           | 7.93     | 0       | 0.23     | 0        | 0.32     | 0.89     | 2.27    | 5.59     | 16.75    | 13.75    | 1.47     |          |
| 1-2.c31272/1/1332  | synapse associated protein 1 [Xenopus laevis]     | 147899972 | NP_00108504 | 5.87     | 0.46    | 3.62     | 7.06     | 0        | 5.85     | 11.74   | 6.67     | 9.72     | 64.29    | 70.25    | 50.36    |
| 2-3.c61212/1/2146  | --                                                | --        | 6           | 13.4     | 4.39    | 11.76    | 9.68     | 10.79    | 4.94     | 5.46    | 9.9      | 2.73     | 2.14     | 2.16     |          |
| 2-3.c14127/1/2577  | MGC82791 protein [Xenopus laevis]                 | 147906957 | NP_00108591 | 0        | 0       | 0        | 1.09     | 0        | 2.02     | 0       | 0.61     | 0        | 0        | 0        |          |
| 1-2.c7608/1/1220   | T-cell, immune regulator 1, A                     | 60422792  | AAH90359.1  | 2.06     | 2.07    | 0        | 1.3      | 0        | 0.03     | 1.5     | 2.43     | 0.53     | 9.73     | 17.34    | 10.39    |
| 2-3.c29408/1/2079  | --                                                | --        | 52.99       | 3.92     | 28.14   | 100.09   | 105.08   | 8.1      | 277.09   | 88.79   | 93.31    | 892.2    | 901.6    | 1084.06  |          |
| 2-3.c39976/1/2109  | --                                                | --        | 0           | 0        | 0       | 0        | 0        | 0        | 0        | 0       | 2.21     | 17       | 38.5     | 0        |          |
| 1-2.c21596/3/1468  | staphylococcal nuclease and nuclease domain       | 147905764 | NP_00108050 | 21.39    | 81.66   | 14.62    | 16.25    | 18.17    | 35.73    | 7.31    | 9.49     | 15.99    | 0        | 1.38     | 12.55    |
| 1-2.c24007/1/1310  | ST3 beta-galactoside alpha-2, 6-sialyltransferase | 147899298 | NP_00108946 | 0.84     | 14.24   | 0.83     | 1.44     | 2.12     | 7.11     | 1.96    | 1.01     | 1.86     | 54.74    | 51.15    | 46.56    |
| 3-6.c2838/10/3582  | solute carrier family 25 member 1                 | 147905724 | NP_00109045 | 53.75    | 10.78   | 42       | 52.43    | 31.81    | 12.15    | 24.15   | 44.27    | 41.35    | 4.19     | 4.92     | 4.83     |
| 2-3.c43219/1/1970  | fibronectin precursor [Xenopus laevis]            | 148237139 | NP_00108127 | 160.23   | 387.28  | 104.8    | 87.34    | 71.78    | 85.46    | 114.81  | 83.7     | 85.18    | 964.76   | 804.56   | 1318.49  |
| 1-2.c26171/1/1387  | uncharacterized protein KIAA0101                  | 166157929 | NP_00110737 | 0        | 0.44    | 0        | 3.42     | 0        | 3.09     | 4.25    | 5.22     | 38.28    | 47.75    | 17.56    |          |
| 2-3.c1656/27/2260  | ATPase family AAA domain                          | 47498020  | NP_998849.1 | 5.01     | 9.69    | 3.3      | 5.56     | 11.7     | 11.59    | 4.95    | 3.9      | 6.62     | 2.17     | 2.08     | 2.03     |
| 1-2.c13529/5/1615  | CDK5 regulatory subunit-associated protein 1      | 58332734  | NP_00101144 | 9.55     | 15.85   | 7.81     | 9.06     | 6.45     | 13.41    | 6.01    | 5.59     | 5.4      | 1.42     | 2.37     | 1.82     |
| 1-2.c40892/1/4041  | alpha-cardiac actin, partial [Xenopus laevis]     | 553858    | AAA37165.1  | 66876.38 | 9995.89 | 92150.49 | 66368.86 | 83817.09 | 69615.86 | 53212.6 | 91864.33 | 56266.36 | 21610.39 | 11275.31 | 24241.46 |
| 2-3.c43293/1/2455  | MGC78980 protein [Xenopus laevis]                 | 147901711 | NP_00108535 | 0        | 0.24    | 0.51     | 0        | 0        | 3.18     | 11.48   | 2.09     | 7.14     | 30.82    | 29.76    | 16.65    |
| 2-3.c60794/2/2103  | PREDICTED: ETS translocase 1                      | 564254896 | XP_00626642 | 4.46     | 14.17   | 4.85     | 2.95     | 6.02     | 10.23    | 1.2     | 1.49     | 6.06     | 0        | 1.28     | 2.05     |
| 2-3.c18947/4/2004  | PREDICTED: calcium-binding protein                | 664741920 | XP_00852826 | 8.61     | 12.15   | 0.01     | 4.84     | 8.96     | 8.55     | 3.15    | 1.54     | 0        | 4.35     | 0        | 0.07     |
| 2-3.c25592/1/2547  | glutamyl-prolyl-tRNA synthetase                   | 189217812 | NP_00112134 | 5.05     | 6.29    | 7.44     | 4.97     | 4.6      | 8.41     | 3.47    | 4.22     | 7.38     | 1.09     | 1.13     | 1.25     |



|                    |                                 |           |             |        |        |        |        |        |        |        |        |        |        |        |        |
|--------------------|---------------------------------|-----------|-------------|--------|--------|--------|--------|--------|--------|--------|--------|--------|--------|--------|--------|
| 2-3.c46954/1/2338  | --                              | --        | 31.84       | 13.51  | 14.23  | 26.11  | 12.95  | 6.07   | 45.6   | 35.54  | 23.72  | 224.02 | 187.69 | 194.11 |        |
| 2-3.c53822/1/2185  | PREDICTED: fibronectin ty       | 512827549 | XP_00293967 | 45.92  | 13.25  | 37.16  | 27.61  | 31.6   | 22.1   | 21.97  | 33.43  | 28.5   | 5.76   | 10.71  | 5.25   |
| 2-3.c48169/1/2278  | --                              | --        | 1.71        | 4.77   | 1.6    | 2.87   | 2.46   | 3.57   | 13.29  | 1.99   | 2.54   | 46.85  | 54.66  | 47.94  |        |
| 2-3.c59915/1/2270  | zinc finger protein-like 1 [Xe  | 147907246 | NP_00109117 | 0      | 0      | 0      | 0      | 0      | 1.31   | 0      | 0.54   | 5.28   | 7.57   | 0      |        |
| 2-3.c25665/1/1969  | PREDICTED: glucosidase, b       | 847088564 | XP_01282071 | 12.86  | 31.18  | 6.68   | 11.04  | 8.68   | 15.98  | 9.37   | 4.04   | 3.02   | 1.71   | 1.96   | 3.7    |
| 1-2.c12067/1/1910  | PREDICTED: splicing factor      | 641783658 | XP_00817420 | 4.58   | 46.79  | 5.27   | 0      | 1.65   | 3.23   | 0      | 1.61   | 2.73   | 0      | 0      | 0      |
| 2-3.c2164/13/2368  | PREDICTED: translation fac      | 301607837 | XP_00293345 | 2.72   | 5      | 1.99   | 1.9    | 5.86   | 6.58   | 1.74   | 1.45   | 3.57   | 0.58   | 0.42   | 1.31   |
| 2-3.c8247/12/1975  | PREDICTED: 3-ketoacyl-Co        | 847088369 | XP_01282030 | 16.75  | 35.71  | 20.02  | 27.15  | 20.78  | 35.87  | 19.79  | 13.12  | 12.68  | 3.92   | 2.69   | 12.44  |
| 1-2.c13235/5/1851  | PREDICTED: probable ATP         | 847108646 | XP_01281406 | 10.93  | 26.64  | 4.74   | 8.19   | 7.62   | 17.45  | 9.46   | 5.21   | 4.13   | 2.45   | 2.9    | 1.7    |
| 1-2.c27244/25/1464 | lumican precursor [Xenopus t    | 58332414  | NP_00101100 | 16.45  | 6.99   | 10.27  | 10.57  | 18.22  | 5.38   | 1.6    | 4.97   | 10.85  | 2.55   | 0      | 3.69   |
| 1-2.c15638/4/1681  | Myozenin-1-like [Xenopus la     | 148237556 | NP_00107945 | 18.87  | 0.21   | 20.11  | 23.02  | 20.21  | 10.49  | 22.37  | 18.51  | 19.57  | 2.94   | 3.47   | 5.93   |
| 1-2.c20352/1/1504  | PREDICTED: glutamine synt       | 541978789 | XP_00544205 | 114.73 | 50.51  | 28.78  | 175.79 | 62.06  | 1.44   | 6.79   | 79.99  | 78.45  | 0      | 0      | 0.74   |
| 1-2.c23240/1/1661  | --                              | --        | 7.75        | 106.1  | 4.33   | 7.84   | 3.63   | 41.71  | 7.41   | 9.35   | 13.94  | 280.81 | 112.51 | 236.78 |        |
| 1-2.c30283/1/1375  | PREDICTED: collagen alpha       | 512850191 | XP_00293872 | 0.03   | 0      | 0.51   | 5.01   | 2.65   | 0      | 6.49   | 3.09   | 4.49   | 0      | 0      | 0      |
| 1-2.c45263/1/1636  | PREDICTED: trafficking pro      | 847136021 | XP_01282041 | 1.45   | 1.06   | 3.85   | 1.46   | 2.26   | 0      | 0.02   | 0      | 0      | 0      | 0      | 0      |
| 1-2.c47868/56/1528 | PREDICTED: intracellular h      | 847086348 | XP_01281437 | 3.98   | 9.78   | 3.84   | 5.53   | 4.69   | 6.61   | 4.54   | 2.14   | 4.01   | 0.73   | 0      | 1.42   |
| 1-2.c7256/1/1317   | --                              | --        | 0           | 34.06  | 2.47   | 2.24   | 0      | 6.18   | 7.91   | 1.55   | 3.93   | 42.8   | 114.65 | 43.94  |        |
| 2-3.c11560/2/2306  | PREDICTED: protein FAM1         | 847092350 | XP_00293564 | 0      | 0.74   | 2.05   | 1.51   | 0.78   | 0.19   | 0.78   | 0.45   | 1.83   | 0      | 0      | 0      |
| 2-3.c36846/1/2727  | PREDICTED: ras-GEF doma         | 847087760 | XP_01281845 | 2.46   | 0      | 0.68   | 0      | 0      | 0      | 1.95   | 1.47   | 0      | 3.98   | 1.94   | 0.16   |
| 3-6.c16219/1/3172  | voltage dependent calcium ch    | 11414922  | BAB18553.1  | 0.1    | 0.7    | 0.36   | 1.84   | 1.13   | 4.17   | 2.38   | 1.26   | 1.02   | 0      | 0      | 0.82   |
| 1-2.c25996/1/1331  | PREDICTED: enoyl-CoA hy         | 821486130 | XP_01240570 | 6.3    | 88.93  | 11.2   | 7.28   | 6.8    | 13.24  | 4.2    | 5.76   | 6.53   | 2.2    | 0.82   | 1.61   |
| 1-2.c8712/1/1530   | legumain precursor [Xenopus     | 54020950  | NP_00100572 | 67.52  | 20.65  | 15.38  | 33.64  | 28.62  | 11.21  | 49.07  | 36.39  | 55.59  | 336.17 | 240.01 | 389.44 |
| 2-3.c40482/1/2104  | calsequestrin 1 (fast-twitch, s | 148231736 | NP_00108022 | 4.46   | 0.83   | 5.19   | 4.73   | 3.08   | 3.75   | 3.89   | 3.46   | 4.17   | 0.23   | 1.11   | 0.45   |
| 1-2.c18353/1/1783  | tropomodulin 4 (muscle) [Xe     | 148233551 | NP_00108736 | 46.67  | 22.52  | 79.96  | 52.51  | 51.48  | 76.66  | 44.86  | 58.79  | 59.91  | 23.36  | 16.78  | 8.42   |
| 1-2.c6580/5/1363   | UBA domain containing 1 [X      | 148235257 | NP_00108937 | 7.72   | 0      | 3.66   | 9.31   | 6.35   | 7.75   | 2      | 2.69   | 0      | 1.52   | 2.77   | 0      |
| 1-2.c2878/14/1585  | ribonucleotide reductase m2 p   | 89268988  | CAJ81953.1  | 4.48   | 20.29  | 0.59   | 5.02   | 7.71   | 16.35  | 3.85   | 2.54   | 9.61   | 3.16   | 2.82   | 0      |
| 2-3.c33225/1/2406  | PREDICTED: ataxin-2 isofor      | 512811031 | XP_00491056 | 0      | 0      | 0      | 0      | 0      | 0.43   | 0      | 0      | 1.04   | 0.54   | 3.07   |        |
| 2-3.c39106/2/2450  | HEAT repeat-containing prot     | 58332728  | NP_00101143 | 7.15   | 7.14   | 5.03   | 3.78   | 5.53   | 7.74   | 2.59   | 4.07   | 3.97   | 0.59   | 1.03   | 1.52   |
| 2-3.c44096/1/1962  | aspartyl/asparaginyl beta-hyd   | 62751990  | NP_00101573 | 3.22   | 1.85   | 5.29   | 3.1    | 5.46   | 9.97   | 4.15   | 4.39   | 4.53   | 0.98   | 1.85   | 0.63   |
| 1-2.c38748/1/1522  | --                              | --        | 7.17        | 6.65   | 4.59   | 4.51   | 4.81   | 6.79   | 12.7   | 0.9    | 1.86   | 66.16  | 62.2   | 89.32  |        |
| 1-2.c4420/1/1487.1 | --                              | --        | 0           | 0      | 0      | 0      | 0.39   | 0.64   | 0      | 0      | 0.31   | 7.71   | 17.43  | 8.37   |        |
| 3-6.c13094/2/2812  | structural maintenance of chrn  | 147900881 | NP_00108374 | 0      | 0      | 0      | 0      | 0      | 0      | 0      | 0      | 1.61   | 0.03   | 2.91   |        |
| 1-2.c38549/1/1415  | protein phosphatase 1 regulat   | 820146588 | KKX13916.1  | 11.77  | 30.38  | 26.76  | 10.66  | 11.85  | 53.72  | 8.94   | 5.1    | 7.92   | 0.24   | 0.73   | 0.59   |
| 1-2.c35667/1/1583  | --                              | --        | 3.04        | 0      | 0      | 1.82   | 1.41   | 1.56   | 0.07   | 1.01   | 1.94   | 0      | 0.17   | 0      |        |
| 1-2.c43909/1/1400  | PREDICTED: protein kinase       | 685612499 | XP_00919443 | 0      | 0      | 0      | 5.15   | 0      | 1.34   | 3.45   | 1.73   | 33.09  | 41.23  | 14.57  |        |
| 1-2.c50972/1/1899  | dehydrogenase/reductase SDI     | 166158027 | NP_00110742 | 20.56  | 8.37   | 20.07  | 16.5   | 14.27  | 10.85  | 12.69  | 8.16   | 20.15  | 0.48   | 0.82   | 7.23   |
| 1-2.c32192/101/146 | voltage-dependent anion char    | 147906224 | NP_00108535 | 202.43 | 134.99 | 136.81 | 135.43 | 110.24 | 63.49  | 79.6   | 102.18 | 102.3  | 23.47  | 5.82   | 48.59  |
| 1-2.c13616/2/1421  | --                              | --        | 6.64        | 12.86  | 7.33   | 9.12   | 6.37   | 14.13  | 14.46  | 4.02   | 10.42  | 119.38 | 144.58 | 143.56 |        |
| 2-3.c15871/11/2666 | PREDICTED: elongation fac       | 301607385 | XP_00293328 | 6.26   | 6.38   | 3.14   | 5.4    | 6.56   | 10.04  | 2.9    | 2.26   | 3.05   | 1.52   | 0.93   | 2.06   |
| 2-3.c63546/3/2210  | myosin heavy chain, partial [I  | 4249697   | AAD13770.1  | 0      | 0      | 4.17   | 1.34   | 1.06   | 0      | 2.56   | 0.25   | 1.22   | 0      | 0      | 0      |
| 2-3.c2630/2/2575.2 | --                              | --        | 34.62       | 32.57  | 0.09   | 1.03   | 0      | 0      | 76.87  | 0      | 0      | 0      | 254.57 | 140.55 |        |
| 2-3.c5324/4/2056   | PREDICTED: tenascin isofor      | 512858291 | XP_00491677 | 1.63   | 0.51   | 7.86   | 1.53   | 2.99   | 0      | 1.62   | 1.11   | 1.23   | 0.01   | 0      | 0      |
| 3-6.c14911/1/2839  | --                              | --        | 9.35        | 51.35  | 8.98   | 6.64   | 7.82   | 9.43   | 16.27  | 7.69   | 11.23  | 146.64 | 130.57 | 59.63  |        |
| 2-3.c5710/2/1883   | PREDICTED: RAC-alpha sei        | 301622901 | XP_00294076 | 3.65   | 9.72   | 1.68   | 2.16   | 1.98   | 3.18   | 0.31   | 0.41   | 0.79   | 0      | 0.17   | 0.38   |
| 1-2.c14515/1/1815  | PREDICTED: elongation fac       | 803119291 | XP_01204081 | 338.49 | 333.5  | 234.32 | 110.16 | 219.58 | 314.94 | 138.61 | 158.1  | 188.46 | 59.87  | 25.21  | 79.84  |
| 1-2.c22857/1/1624  | embryonal Fyn-associated sul    | 148235363 | NP_00108837 | 0      | 0      | 0      | 0.4    | 0      | 0      | 1.32   | 3.11   | 0      | 8.79   | 7.44   | 1.2    |
| 1-2.c46046/1/1421  | --                              | --        | 4.16        | 10.44  | 0      | 0      | 0      | 0      | 0      | 3.95   | 5.44   | 0      | 28.66  | 11.94  |        |
| 2-3.c48914/3/2386  | PREDICTED: protein LZIC [       | 704504142 | XP_01007875 | 2.83   | 0.86   | 3.46   | 2.92   | 2.48   | 1.92   | 1.08   | 0.73   | 0.44   | 0.25   | 0      | 0.39   |
| 2-3.c49018/1/2587  | Mimitin, mitochondrial precu    | 226372810 | ACO52030.1  | 6.13   | 8.88   | 6.86   | 7.37   | 4.25   | 5.76   | 5.17   | 5.9    | 4.82   | 0.4    | 1.23   | 1.49   |
| 3-6.c14157/1/2691  | Cysteine--tRNA ligase, cytop    | 676706853 | KFO84757.1  | 11.4   | 14.79  | 10.43  | 7.17   | 11.12  | 15.37  | 8.94   | 9.96   | 8.57   | 2.07   | 0.57   | 4.59   |
| 2-3.c19888/1/2406  | --                              | --        | 0           | 0.38   | 0.15   | 0      | --     | 2.5    | 1.63   | 0      | 1.59   | 0      | 0      | 0      | 0      |
| 2-3.c27193/1/2161  | PREDICTED: transmembran         | 301612255 | XP_00293563 | 3.34   | 2      | 1.48   | 1.38   | 0.68   | 0.61   | 0      | 3.39   | 3.76   | 42.06  | 31.07  | 7.31   |
| 1-2.c39431/2/1389  | --                              | --        | 5.83        | 10.34  | 2.07   | 4.68   | 1.43   | 6.43   | 6.72   | 4.64   | 7.16   | 44.47  | 48.72  | 78.83  |        |
| 1-2.c49606/1/1305  | --                              | --        | 0           | 4.35   | 1.31   | 0      | 2.19   | 3.82   | 0      | 0      | 0      | 0      | 0      | 0      | 0      |
| 1-2.c5788/18/1677  | PREDICTED: nucleolar com        | 847086891 | XP_01281575 | 4.82   | 16.74  | 2.32   | 2.86   | 3.54   | 7.52   | 3.59   | 4.19   | 2.48   | 0.78   | 0.48   | 0.6    |
| 2-3.c36998/1/2078  | Transmembrane BAX inhibi        | 225708156 | ACO09924.1  | 0.06   | 16.39  | 0.12   | 0      | 0.03   | 0      | 0      | 0      | 26.81  | 19.56  | 8.73   | 0      |
| 2-3.c55627/1/2144  | PREDICTED: poliovirus rec       | 513222218 | XP_00494808 | 0      | 4.19   | 1.79   | 2.37   | 1.94   | 3.2    | 3.15   | 0.68   | 1.72   | 0      | 0      | 0.14   |
| 3-6.c13530/4/4075  | protein-arginine deiminase ty   | 156717898 | NP_00109645 | 7.49   | 0.64   | 12.18  | 16.56  | 17.69  | 12.16  | 22.5   | 1      | 1.47   | 1.87   | 8.09   | 3      |

|                    |                                  |           |             |        |        |        |        |        |       |        |        |        |        |        |        |
|--------------------|----------------------------------|-----------|-------------|--------|--------|--------|--------|--------|-------|--------|--------|--------|--------|--------|--------|
| 3-6.c19073/1/3623  | PREDICTED: DNA-directed          | 291241363 | XP_00274058 | 0.32   | 3.41   | 0      | 0.86   | 2.7    | 3.36  | 0      | 0.57   | 1.05   | 0      | 0.65   | 0.44   |
| 2-3.c48135/1/2112  | --                               | --        | --          | 3.13   | 3.18   | 1.74   | 1.52   | 2.17   | 0.62  | 6.06   | 0.61   | 0.8    | 20.2   | 11.07  | 34.9   |
| 1-2.c3595/4/1873   | eukaryotic translation initiatic | 187608058 | NP_00112056 | 38.13  | 60.95  | 26.48  | 19.37  | 18.98  | 40.8  | 17.77  | 24.13  | 20.27  | 5.51   | 4.36   | 8.75   |
| 1-2.c9606/1/1525.1 | PREDICTED: calcium uptaki        | 847172778 | XP_0128096C | 2.43   | 3.89   | 8.66   | 4.23   | 8.17   | 4.82  | 2.02   | 3.56   | 2.73   | 0.61   | 0      | 0.26   |
| 1-2.c29178/1/11718 | tripartite motif containing 54   | 147905260 | NP_00108505 | 65.24  | 12.79  | 21.08  | 20.97  | 40.44  | 26.48 | 25.79  | 42.17  | 18.87  | 2.09   | 10.94  | 5.69   |
| 2-3.c32781/1/2469  | 3-hydroxyisobutyrate dehydr      | 71896099  | NP_0010256C | 7.82   | 2.69   | 4.16   | 7.37   | 3.85   | 1.49  | 7.05   | 5.33   | 3.71   | 0.86   | 0.19   | 0.14   |
| 1-2.c1713/18/1645  | PREDICTED: fumarate hydr         | 512842641 | XP_00293586 | 27.07  | 0.68   | 0      | 0.25   | 28.3   | 27.23 | 10.18  | 0      | 44.23  | 1.15   | 0.89   | 0      |
| 2-3.c37219/1/2338  | --                               | --        | --          | 0.18   | 0      | 0      | 0      | 4.16   | 7.23  | 0.42   | 0      | 7.65   | 0      | 0.19   | 0      |
| 2-3.c58217/38/2132 | high density lipoprotein bindi   | 160420251 | NP_00108016 | 30.62  | 35.13  | 31.71  | 34.39  | 23.84  | 25.52 | 42.49  | 13.44  | 27.71  | 3.25   | 0      | 15.81  |
| 1-2.c30722/2/1799  | 15 kDa selenoprotein precurs     | 30231240  | NP_840079.1 | 8.74   | 15.85  | 5.97   | 3.41   | 6.83   | 8.28  | 1.86   | 2.52   | 3.77   | 0      | 0.51   | 2.36   |
| 1-2.c32601/2/1413  | --                               | --        | --          | 7.78   | 0.44   | 5.76   | 84.94  | 0      | 5.71  | 105.78 | 41.34  | 43.57  | 324.64 | 365.69 | 478.36 |
| 2-3.c57925/3/2302  | PREDICTED: 60 kDa heat st        | 768339285 | XP_0115744C | 0.2    | 1.39   | 0      | 0      | 1.39   | 1.07  | 0      | 0      | 0      | 0      | 0      | 0      |
| 1-2.c25403/1/1833  | PREDICTED: protein tyrosin       | 149638430 | XP_0015067C | 29.56  | 1.61   | 11.52  | 22.9   | 36.09  | 9.8   | 13     | 11.4   | 14.4   | 0      | 0      | 10.82  |
| 2-3.c48822/1/2116  | --                               | --        | --          | 32.83  | 3.45   | 14.21  | 16.52  | 15.96  | 9.72  | 9.18   | 9.93   | 17.58  | 1.83   | 4.56   | 2.68   |
| 2-3.c5120/2/2021   | --                               | --        | --          | 4.57   | 0      | 8.9    | 25.17  | 6.93   | 0.07  | 0      | 0.83   | 4.71   | 0      | 0      | 0      |
| 3-6.c16923/1/3292  | voltage dependent calcium ch     | 11414922  | BAB18553.1  | 12.44  | 7.08   | 15.33  | 15.29  | 15.12  | 24.79 | 20.2   | 15.88  | 15.41  | 3.73   | 4.3    | 5.78   |
| 2-3.c42447/1/2277  | von Willebrand factor A dom      | 148228482 | NP_00107996 | 4.54   | 6.9    | 2.56   | 2.45   | 5.65   | 11.54 | 10.48  | 3.23   | 3.31   | 59.77  | 81.82  | 107.48 |
| 2-3.c10111/4/2472  | PREDICTED: long-chain fatt       | 512839272 | XP_00491424 | 1.03   | 0      | 1.68   | 2.29   | 0.35   | 0.69  | 0      | 0      | 0      | 0      | 0      | 0      |
| 2-3.c48426/1/4415  | PREDICTED: beta-enolase [        | 637381761 | XP_00812393 | 0      | 0      | 0.02   | 0      | 0      | 0     | 0      | 0      | 0      | 71.25  | 17.54  | 0      |
| 1-2.c28936/2/1245  | nucleolar protein family A, m    | 89271893  | CAJ82850.1  | 9.15   | 55.6   | 8.45   | 10.79  | 10.89  | 31.68 | 19.73  | 7.16   | 6.36   | 4.14   | 2.51   | 2.96   |
| 1-2.c36779/1/1350  | transforming, acidic coiled-cc   | 147905121 | NP_00109042 | 4.87   | 13.2   | 1.65   | 0.01   | 0      | 0     | 4.68   | 2.47   | 0      | 2.59   | 1.24   | 4.67   |
| 2-3.c2248/10/1935  | rrp1b protein [Xenopus (Silu     | 60552498  | AAH91594.1  | 34.8   | 66.49  | 22.54  | 18.2   | 18.75  | 37.07 | 24.06  | 19.97  | 16.83  | 5.09   | 10.62  | 3.53   |
| 1-2.c50413/1/1221  | PREDICTED: ubiquitin-prot        | 637309248 | XP_00811045 | 3.72   | 0.59   | 0.17   | 1.43   | 0.76   | 0     | 4.53   | 1.28   | 2.01   | 26.99  | 8.52   | 13.67  |
| 2-3.c13202/2/2332  | aquaporin [Hyla japonica]        | 148356713 | BAF63030.1  | 39.06  | 16.69  | 11.71  | 16.96  | 31.76  | 0.24  | 24.2   | 18.93  | 14.12  | 0      | 0      | 0.62   |
| 2-3.c41661/1/2205  | PREDICTED: serine/threonin       | 512844020 | XP_00491484 | 4.29   | 3.54   | 4.65   | 4.24   | 3.63   | 5.06  | 1.93   | 3.06   | 4.73   | 0.58   | 0.34   | 1.07   |
| 3-6.c7691/1/3994   | translocating chain-associat     | 147905532 | NP_00108662 | 1.58   | 1.98   | 1.19   | 1.9    | 1.45   | 1.87  | 0.17   | 0.79   | 0.64   | 0.35   | 0      | 0.34   |
| 1-2.c34246/1/1383  | MAM domain-containing pro        | 118403772 | NP_00107284 | 0      | 0      | 0      | 0.38   | 0      | 0     | 0.96   | 0.52   | 0      | 7.91   | 5.26   | 5.14   |
| 2-3.c48540/1/1999  | zyxin [Xenopus laevis]-gii18     | 148886688 | NP_00109215 | 14.34  | 29.93  | 5.64   | 9.9    | 5.45   | 6.96  | 21.15  | 10.44  | 6.47   | 112.04 | 116.48 | 69.77  |
| 2-3.c25377/1/2261  | --                               | --        | --          | 0.97   | 2.31   | 0      | 1.68   | 0      | 1.78  | 0      | 0      | 1.79   | 0      | 0      | 0      |
| 1-2.c51625/6/1680  | GI12770 [Drosophila mojav        | 195125345 | XP_00200713 | 1.78   | 3.31   | 0      | 0      | 0      | 3.99  | 0.9    | 0.77   | 0      | 15.66  | 23.56  | 20.07  |
| 1-2.c2716/15/1806  | PREDICTED: solute carrier 1      | 512851875 | XP_00293681 | 8.21   | 2.07   | 5.01   | 1.66   | 4.02   | 1.69  | 4.19   | 1.93   | 4.02   | 0.29   | 0      | 0.24   |
| 2-3.c25610/1/2248  | PREDICTED: liprin-beta-2 is      | 697434073 | XP_00967843 | 0      | 4.07   | 5.03   | 0      | 2.87   | 0     | 5.16   | 6.71   | 10.33  | 17.84  | 23.26  | 18.74  |
| 1-2.c1840/18/1740  | cystathionine gamma-lyase [      | 148238287 | NP_00108798 | 103.05 | 25.28  | 49.54  | 68.13  | 121.71 | 25.39 | 131.89 | 139.94 | 119.73 | 6.24   | 12.32  | 8.02   |
| 2-3.c19950/1/2474  | PREDICTED: ubiquitin-asso        | 556949722 | XP_00598744 | 0      | 0      | 2.54   | 5.8    | 1.59   | 2.01  | 1.54   | 1.36   | 2.15   | 0.31   | 0      | 0      |
| 3-6.c11523/1/3006  | PREDICTED: acidic leucine-       | 768401936 | XP_01159692 | 5.98   | 24.37  | 9.68   | 6.53   | 12.99  | 9.21  | 2.05   | 3.61   | 3.49   | 1.3    | 1.7    | 2.89   |
| 1-2.c27381/2/1371  | acyl-CoA-binding domain-co       | 577861032 | NP_00107282 | 0      | 2.12   | 1      | 0      | 0      | 0     | 2.73   | 0      | 0.01   | 3.59   | 4.89   | 0.65   |
| 2-3.c3893/2/2463.3 | --                               | --        | --          | 1.52   | 5.41   | 0      | 3.21   | 0.73   | 2.67  | 6.85   | 1.28   | 0.45   | 39.76  | 49.08  | 53.47  |
| 2-3.c35192/1/2163  | --                               | --        | --          | 0.2    | 1.07   | 0.07   | 0.57   | 0.23   | 0.36  | 2.19   | 0.15   | 0.48   | 10.04  | 5.77   | 8.37   |
| 1-2.c36197/1/1377  | cullin-3 [Xenopus (Silurana)     | 134085433 | NP_00101597 | 0      | 0.17   | 0.51   | 1.39   | 0      | 0     | 6.22   | 0      | 1.74   | 12.18  | 12.77  | 9.16   |
| 2-3.c39062/1/2545  | PREDICTED: unconventiona         | 847102432 | XP_01281298 | 11.49  | 0.02   | 7.13   | 0.31   | 15.31  | 4.4   | 0      | 0      | 2.09   | 0      | 0      | 0      |
| 2-3.c56794/1/2394  | DNA polymerase epsilon [Xe       | 11493740  | AAG35631.1  | 0      | 7.14   | 0.4    | 0.1    | 0.98   | 1.22  | 0.07   | 0.09   | 0.33   | 0      | 0      | 0      |
| 1-2.c25105/2/1389  | heterogeneous nuclear ribonu     | 147905111 | NP_00108132 | 17.96  | 51.24  | 14.24  | 16.34  | 19.8   | 30.72 | 9.09   | 11.57  | 0      | 0      | 3.91   | 10.41  |
| 3-6.c6979/1/3014   | PREDICTED: GSK-3-bindin          | 512846394 | XP_0049152C | 0.39   | 0.2    | 0      | 0      | 0      | 0     | 0.26   | 0      | 0.14   | 0.86   | 1.91   | 0.69   |
| 1-2.c13856/1/1283  | --                               | --        | --          | 0.88   | 2.84   | 1.74   | 2.89   | 0      | 1.59  | 6.81   | 6.42   | 4.5    | 26.75  | 30.3   | 21.46  |
| 2-3.c34147/3/2254  | transmembrane BAX inhibito       | 147899637 | NP_00108928 | 0.04   | 0.04   | 21.49  | 0      | 0      | 0     | 0      | 9.79   | 3.6    | 2.41   | 0      | 0      |
| 1-2.c32562/2/1570  | PMCA1bx [Rana catesbeiana        | 12963455  | AAK11272.1  | 13.6   | 29.41  | 0.05   | 0      | 0.45   | 23.51 | 20.64  | 4.9    | 0      | 81.16  | 80.87  | 118.03 |
| 1-2.c2379/7/1573   | PREDICTED: dimethyladenc         | 512842699 | XP_00491468 | 0      | 2.11   | 1.48   | 1.98   | 1.25   | 4.31  | 0      | 1.38   | 0.78   | 0      | 0      | 0.41   |
| 2-3.c27589/1/2256  | --                               | --        | --          | 2.43   | 10.04  | 1.88   | 2.72   | 2.87   | 7.48  | 3.13   | 1.62   | 1      | 0.85   | 0.37   | 0.86   |
| 1-2.c38391/1/1234  | --                               | --        | --          | 20.33  | 0.36   | 3.88   | 17.2   | 4.71   | 14.25 | 29.44  | 15.25  | 23.38  | 159.2  | 219.92 | 100.31 |
| 2-3.c20226/1/2163  | PREDICTED: protein Shroor        | 847100721 | XP_01281266 | 2.52   | 1.03   | 0.68   | 0.85   | 1.09   | 1.52  | 0.84   | 0.09   | 0.11   | 13.33  | 14.84  | 24.86  |
| 2-3.c56465/1/2009  | uncharacterized protein LOC      | 148222510 | NP_00108474 | 0      | 0.41   | 0      | 0      | 0      | 0     | 0      | 0      | 0      | 8.06   | 17     | 0      |
| 1-2.c26095/1/1421  | PREDICTED: exosome com           | 560908898 | XP_00618076 | 2.4    | 17     | 2.57   | 3.27   | 3.82   | 6.94  | 2.47   | 1.73   | 2.27   | 0.81   | 0.62   | 0.25   |
| 2-3.c43426/1/2453  | PREDICTED: tubulin polygl        | 847153386 | XP_01282351 | 1.48   | 3.22   | 0.27   | 1.24   | 1.07   | 0.7   | 3.34   | 1.08   | 1.36   | 16.87  | 19.3   | 13.27  |
| 1-2.c41750/1/1608  | PREDICTED: protein phosp         | 823396584 | XP_01241593 | 0      | 15.36  | 0      | 0      | 1.5    | 2.6   | 0      | 0      | 0      | 0      | 0      | 0      |
| 2-3.c29258/1/1823  | DNA replication licensing fac    | 148236609 | NP_00107906 | 2.71   | 28.24  | 1.63   | 1.2    | 4.83   | 9.65  | 0.14   | 1.76   | 2.16   | 0.36   | 0.21   | 0.42   |
| 1-2.c20667/1/5740  | PREDICTED: basic leucine z       | 641711076 | XP_00814465 | 138.49 | 102.22 | 49.2   | 37.6   | 84.76  | 63.19 | 43.46  | 32.51  | 45.13  | 38.67  | 0      | 2.86   |
| 1-2.c30567/1/1501  | ubiquinol-cytochrome c red       | 147902934 | NP_00107971 | 143.38 | 101.86 | 177.86 | 158.13 | 108.49 | 32.77 | 58.38  | 61.58  | 78.21  | 0      | 0      | 34.88  |
| 1-2.c36723/1/1293  | Putative uncharacterized tran    | 449282618 | EMC89440.1  | 0.28   | 0.19   | 0      | 0.19   | 0      | 0     | 0      | 0      | 0.32   | 8.87   | 11.23  | 0.5    |

|                     |                                |           |             |         |        |          |          |          |         |        |          |          |         |         |         |
|---------------------|--------------------------------|-----------|-------------|---------|--------|----------|----------|----------|---------|--------|----------|----------|---------|---------|---------|
| 1-2.c50474/1/1101   | sodium/potassium-transportin   | 52346048  | NP_00100506 | 68.83   | 25.1   | 34.39    | 28.33    | 25.95    | 10.15   | 5.37   | 30.05    | 14.96    | 4.82    | 3.17    | 6.24    |
| 2-3.c63373/15/2144  | PREDICTED: glycogen phos       | 505849981 | XP_00461844 | 0       | 0      | 0        | 0        | 0        | 0.18    | 12.1   | 0        | 17.35    | 12.23   | 17.03   | 0       |
| 2-3.c3061/1/2339.2  | --                             | --        | --          | 4.18    | 1.31   | 11.11    | 10.78    | 12.45    | 23.78   | 10.61  | 12.49    | 21.52    | 3       | 3.11    | 1.82    |
| 2-3.c15583/1/2134   | UTP18 small subunit (SSU) f    | 147898751 | NP_00109005 | 9.63    | 34.02  | 5.64     | 6.44     | 8.6      | 15.88   | 8.85   | 5.69     | 5.35     | 0.92    | 1.29    | 4.03    |
| 1-2.c40948/1/1437   | PREDICTED: glutamic acid-      | 780154032 | XP_01168211 | 1.88    | 5.03   | 0.68     | 1.84     | 1.14     | 3.41    | 5.82   | 1.55     | 1.32     | 23.82   | 32.9    | 37.77   |
| 1-2.c27020/27/161   | PREDICTED: lupus La prote      | 591363494 | XP_00705665 | 17.47   | 113.4  | 11.7     | 15.25    | 21.37    | 53.65   | 20.5   | 14.16    | 18.3     | 5.81    | 5.46    | 4.72    |
| 1-2.c9042/2/1267    | --                             | --        | --          | 13.26   | 14.64  | 8.08     | 11.04    | 10.69    | 14.46   | 8.74   | 7.82     | 8.71     | 2.45    | 3.17    | 1.65    |
| 2-3.c20037/1/2462   | --                             | --        | --          | 4.11    | 0      | 7.76     | 9.23     | 10.71    | 0       | 0      | 4.8      | 5.66     | 0.67    | 0       | 0       |
| 2-3.c29896/1/2588   | --                             | --        | --          | 17.72   | 4.29   | 17.74    | 16.21    | 10.85    | 7.72    | 11.33  | 10.61    | 19.49    | 4.42    | 2.56    | 1.83    |
| 2-3.c9385/1/2521.1  | --                             | --        | --          | 1.57    | 7.42   | 2.02     | 2.29     | 2.59     | 3.72    | 4.01   | 2.14     | 1.27     | 0.61    | 0.16    | 0       |
| 3-6.c4323/1/2780    | PREDICTED: spectrin beta c     | 512862388 | XP_00293694 | 11.86   | 20.75  | 10.75    | 5.68     | 7.87     | 19.11   | 4.59   | 7.09     | 9.47     | 1.71    | 3.33    | 1.78    |
| 1-2.c26338/1/1639   | PREDICTED: endothelial lip     | 847089272 | XP_01282215 | 0.78    | 3.89   | 1.69     | 0.12     | 3.44     | 3.57    | 0.71   | 0.26     | 0.7      | 0       | 0.31    | 0       |
| 1-2.c4860/1/1038    | PREDICTED: family with se      | 847117708 | XP_01281635 | 5.86    | 4.62   | 3.07     | 3.01     | 7.21     | 1.89    | 6.67   | 5.78     | 3.26     | 52.5    | 51.85   | 90.35   |
| 2-3.c39397/3/1976   | aspartyl/asparaginyl beta-hyd  | 62751990  | NP_00101573 | 2.19    | 5      | 7.64     | 5.18     | 7.38     | 24.27   | 5.01   | 5.65     | 6.68     | 1.02    | 0       | 0.86    |
| 1-2.c24835/1/1678   | potassium channel subfamily    | 187607255 | NP_00112042 | 3.57    | 2.81   | 1.66     | 4.07     | 3.89     | 2.15    | 2.48   | 2.75     | 4.85     | 59.2    | 39.7    | 60.92   |
| 1-2.c45212/1/1917.1 | --                             | --        | --          | 7.94    | 4.22   | 7.39     | 4.41     | 4.16     | 0.55    | 10.43  | 6.09     | 6.15     | 0       | 0       | 0       |
| 1-2.c35048/7/1569   | histone-binding protein RBB1   | 89886120  | NP_00101135 | 2.16    | 36.1   | 2.4      | 2.8      | 5.05     | 6.86    | 1.53   | 4.27     | 2        | 0       | 0       | 1.78    |
| 2-3.c27095/1/2698   | PREDICTED: polypeptide N       | 847131447 | XP_01281920 | 0       | 0      | 0.18     | 0        | 9.29     | 8.21    | 0      | 0.83     | 8.05     | 0       | 0.6     | 0       |
| 3-6.c18468/1/2862   | formin-binding protein 1 [Xei  | 118404564 | NP_00107266 | 3.04    | 0      | 4.17     | 3.76     | 4.45     | 1.56    | 1.69   | 2.31     | 0        | 0.58    | 0       | 1.02    |
| 3-6.c9383/2/3808    | adaptor-related protein compl  | 147900121 | NP_00108530 | 12.44   | 6.1    | 6.69     | 4.39     | 8.69     | 3.09    | 1.51   | 5.3      | 1.91     | 0.45    | 0.53    | 2.44    |
| 2-3.c60255/1/2399   | --                             | --        | --          | 3.99    | 12.83  | 4.06     | 4.83     | 3.22     | 5.03    | 1.1    | 2.72     | 3.36     | 0.96    | 0.41    | 0.2     |
| 1-2.c11463/1/1346   | PREDICTED: peroxiredoxin-      | 573894288 | XP_00663485 | 136.18  | 110.62 | 64.32    | 135.68   | 115.27   | 45.48   | 312.23 | 89.82    | 96.65    | 1016.99 | 1570.37 | 1234.02 |
| 1-2.c29446/1/1669   | PREDICTED: lamina-associ       | 847176929 | XP_01281093 | 0       | 13.46  | 0        | 1.24     | 0        | 0.1     | 0      | 0        | 2.26     | 13.48   | 23.88   | 5.37    |
| 3-6.c16117/1/3156   | signal transducer and activat  | 148232026 | NP_00108467 | 10.86   | 0.19   | 2.41     | 3.44     | 4.15     | 1.18    | 5.62   | 6.7      | 5.41     | 48.82   | 34.92   | 42.05   |
| 1-2.c14124/2/1303   | Tubulin alpha-1C chain [Lari   | 808859777 | KKF11870.1  | 13.29   | 0      | 0        | 1.29     | 0        | 12.4    | 18.55  | 4.02     | 7.23     | 51.97   | 83.35   | 42.01   |
| 2-3.c26785/1/2444   | --                             | --        | --          | 7.03    | 3.79   | 20.18    | 14.14    | 20.66    | 17.16   | 13.39  | 9.98     | 16.95    | 3.64    | 0.99    | 7.6     |
| 3-6.c4999/1/3536    | collagen alpha-1(I) chain prec | 58332412  | NP_00101100 | 24.8    | 597.92 | 128.04   | 72.61    | 119.25   | 424.5   | 48.61  | 40.4     | 83.21    | 7.89    | 4.83    | 6.11    |
| 2-3.c24403/1/2592   | --                             | --        | --          | 1.52    | 0      | 0        | 1.51     | 0.25     | 0       | 3.95   | 0.23     | 0        | 16.67   | 20.84   | 8.8     |
| 1-2.c7347/2/1466    | --                             | --        | --          | 0       | 0      | 0        | 0        | 0        | 0       | 0      | 0        | 0        | 3.14    | 4.16    | 0.7     |
| 3-6.c10550/1/3567   | RecName: Full=Sarcoplasmic     | 9789732   | Q92105.1    | 1.48    | 0.36   | 2.41     | 2.34     | 3.13     | 1.72    | 2.38   | 2.52     | 1.77     | 0       | 0.16    | 0.35    |
| 2-3.c60674/1/4149   | PREDICTED: protein phosph      | 512847586 | XP_00491535 | 0       | 1.53   | 0        | 0        | 0        | 0       | 0.38   | 0        | 0        | 0       | 6.24    | 18.83   |
| 3-6.c14134/1/3117   | PREDICTED: eukaryotic trar     | 734641821 | XP_01074981 | 0       | 11.45  | 4.31     | 5.2      | 5.88     | 10.91   | 9.77   | 2.85     | 0        | 5.1     | 0       | 0       |
| 2-3.c25918/1/1985   | Unknown (protein for MGC:1     | 120538440 | AAI29682.1  | 2.02    | 0      | 0.67     | 2.27     | 3.61     | 0       | 13.52  | 2.19     | 12.23    | 34.61   | 17.57   | 65.16   |
| 3-6.c3223/2/2906    | TGF-beta-activated kinase 1 ;  | 147905935 | NP_00109076 | 0       | 0.82   | 0.4      | 0.24     | 0.79     | 0.79    | 0      | 0.04     | 0.43     | 0       | 0       | 0       |
| 2-3.c2343/27/2592   | PREDICTED: translation init    | 512840815 | XP_00293518 | 8.96    | 17.07  | 3.86     | 4.2      | 6.65     | 16.54   | 4.64   | 3.63     | 0.79     | 0.62    | 0       | 2.58    |
| 2-3.c32721/1/10210  | --                             | --        | --          | 7.2     | 15.38  | 11.28    | 6.87     | 10.97    | 12.99   | 4.79   | 5.66     | 11.53    | 1.05    | 0.31    | 0.89    |
| 2-3.c5582/1/2418    | --                             | --        | --          | 25.27   | 31     | 24.02    | 16.68    | 20.16    | 23.17   | 18.11  | 16.21    | 22.04    | 4.61    | 3.3     | 6.97    |
| 3-6.c18530/1/3121   | ZZ-type zinc finger-containin  | 678212196 | KFV79175.1  | 0       | 3.67   | 0.61     | 0        | 0.79     | 1.52    | 0.63   | 0        | 0        | 0       | 0       | 0       |
| 1-2.c27491/1/1562   | --                             | --        | --          | 20      | 6.9    | 5.59     | 16.03    | 5.1      | 2.39    | 24.95  | 15.54    | 13.83    | 115.93  | 148.12  | 111.47  |
| 2-3.c2615/19/1916   | Unknown (protein for IMAG      | 76779686  | AAI06679.1  | 34.89   | 25.35  | 29.66    | 17.56    | 20.45    | 6.42    | 61.19  | 13.02    | 20.89    | 3.61    | 3.54    | 3.99    |
| 1-2.c10827/5/1557   | glycogen phosphorylase, brai   | 50054411  | NP_00100190 | 11.83   | 20.26  | 10.48    | 53.84    | 32.92    | 34.33   | 32.79  | 15.81    | 41.81    | 15.55   | 9.55    | 7.61    |
| 1-2.c24777/1/1365   | PREDICTED: glycogen debr       | 847125952 | XP_01281792 | 8.55    | 2.6    | 5.89     | 23.68    | 15.21    | 9.21    | 14.32  | 13.53    | 30.41    | 4.36    | 4.88    | 2.27    |
| 2-3.c36416/2/2367   | PREDICTED: PAB-dependen        | 512822114 | XP_00293457 | 0       | 3.62   | 0.74     | 0.7      | 0.97     | 0.59    | 0.83   | 0.52     | 0        | 0       | 0       | 0       |
| 2-3.c44825/161/250  | dual specificity mitogen-activ | 56118586  | NP_00100805 | 55.27   | 66     | 50.67    | 18.34    | 41.85    | 53.37   | 16.05  | 19.6     | 16.67    | 7.43    | 5.7     | 15.75   |
| 2-3.c29832/1/2400   | --                             | --        | --          | 0       | 0      | 0        | 0        | 0        | 0       | 0      | 0        | 0        | 25.55   | 0       | 13.95   |
| 2-3.c51277/184/224  | PREDICTED: nucleolar GTP       | 512849296 | XP_00293522 | 17.7    | 10.11  | 17.61    | 11.39    | 3.15     | 18.65   | 3.43   | 9.37     | 11.04    | 4.45    | 0       | 0       |
| 2-3.c8471/7/2213    | pyruvate kinase PKM isoform    | 118405080 | NP_00107253 | 3.02    | 0.99   | 12.28    | 8.17     | 8.73     | 4.58    | 3.1    | 8.58     | 7.95     | 2.19    | 1.05    | 1.45    |
| 3-6.c16944/1/3404   | tax1-binding protein 1 homol   | 45361339  | NP_989247.1 | 0       | 0.18   | 0        | 0        | 0        | 0       | 0      | 0        | 0        | 1.77    | 0.2     | 1.01    |
| 1-2.c4143/14/1638   | cleavage stimulation factor su | 194332803 | NP_00112370 | 0       | 0      | 0        | 0        | 2        | 1.45    | 0      | 0        | 0        | 0       | 0       | 0       |
| 2-3.c2868/11/2363   | agmatine ureohydrolase (agm    | 147900416 | NP_00108921 | 20.63   | 9.91   | 28.12    | 23.84    | 23.68    | 23.2    | 18.7   | 16.67    | 21.7     | 5.6     | 8.96    | 4.81    |
| 2-3.c54205/1/2507   | --                             | --        | --          | 1.26    | 2.77   | 6.54     | 0.31     | 4.35     | 9.13    | 1.93   | 1.35     | 4.24     | 0       | 0       | 0       |
| 1-2.c36338/1/1758   | --                             | --        | --          | 0       | 0      | 0        | 0        | 0        | 0.19    | 0      | 0        | 0        | 5.49    | 11.56   | 2.41    |
| 1-2.c33609/1/10505  | PREDICTED: actin, alpha ca     | 327288034 | XP_00322873 | 8832.52 | 1536   | 16941.28 | 12918.23 | 12995.92 | 9205.59 | 8650.7 | 13191.73 | 10153.76 | 2765.41 | 1491.55 | 5364.32 |
| 2-3.c1148/118/2211  | glycine amidinotransferase (L  | 89272889  | CAJ82904.1  | 0       | 39.92  | 0        | 10.35    | 0.23     | 54.9    | 3.64   | 0        | 1.8      | 0       | 0       | 0       |
| 3-6.c16496/1/2877   | --                             | --        | --          | 62.92   | 26.18  | 8.6      | 32.24    | 22.07    | 13.52   | 39.22  | 17.36    | 23.53    | 299.74  | 571.26  | 197.29  |
| 1-2.c49811/1/1411   | stearoyl-CoA desaturase (delt  | 147901446 | NP_00108780 | 0       | 0.38   | 0.58     | 0        | 0.53     | 0.54    | 1.03   | 0.31     | 0.48     | 13.89   | 8.98    | 5.83    |
| 2-3.c50147/1/2073   | --                             | --        | --          | 4.84    | 6.59   | 4.98     | 8.34     | 4.2      | 2.01    | 21.2   | 5.58     | 5.94     | 68.62   | 48.27   | 76.4    |
| 2-3.c8493/2/1960    | PREDICTED: ankryrin-1 isofi    | 847110220 | XP_01281460 | 20.13   | 1.36   | 15.93    | 52.29    | 11.76    | 26.48   | 52.31  | 11.96    | 27.83    | 4.9     | 5.73    | 0       |

|                    |                                  |           |             |        |        |         |         |         |         |         |         |         |        |        |        |
|--------------------|----------------------------------|-----------|-------------|--------|--------|---------|---------|---------|---------|---------|---------|---------|--------|--------|--------|
| 1-2.c27738/1/1672  | PREDICTED: collagen alpha        | 664740187 | XP_00852735 | 2.63   | 26.56  | 9.59    | 8.95    | 0.89    | 2.35    | 0.08    | 5.47    | 1.87    | 0      | 0      | 0      |
| 1-2.c7319/1/1713   | reverse transcriptase, partial [ | 347227    | AAA49027.1  | 2.75   | 6.28   | 1.9     | 1.14    | 1.02    | 1.73    | 3.86    | 1.37    | 0.74    | 18.91  | 24.21  | 27.58  |
| 1-2.c12407/5/1663  | PREDICTED: protein SET is        | 847153649 | XP_0128236C | 10.18  | 26.56  | 8.19    | 0.86    | 8.23    | 2.12    | 0.36    | 5.48    | 0       | 0      | 0      | 0      |
| 2-3.c11600/3/2314  | --                               | --        | --          | 3.94   | 29.36  | 3.23    | 1.69    | 2.28    | 16.43   | 0.87    | 2.08    | 0       | 0      | 0      | 0      |
| 3-6.c9838/1/4837   | tetratricopeptide repeat protei  | 148224016 | NP_00108657 | 2.5    | 3.25   | 1.54    | 1.07    | 1.39    | 3.45    | 1.03    | 1.13    | 1.01    | 0.52   | 0.21   | 0.27   |
| 1-2.c28173/1/1300  | --                               | --        | --          | 0      | 2.28   | 0       | 0       | 1.3     | 0       | 0.49    | 0       | 1.72    | 13.26  | 13.09  | 9.64   |
| 2-3.c14683/1/2360  | --                               | --        | --          | 0      | 2.24   | 0       | 2.09    | 1.19    | 0       | 0       | 1.1     | 0       | 0      | 0      | 0      |
| 1-2.c17756/1/1804  | DBIRD complex subunit ZNI        | 349585177 | NP_00101608 | 3.61   | 18.27  | 2.45    | 3.05    | 10.44   | 10.31   | 3.7     | 0.84    | 1.76    | 1.04   | 1.11   | 2.43   |
| 1-2.c34011/1/1250  | alpha-actinin-3 [Xenopus         | 213983245 | NP_00113551 | 831.69 | 182.88 | 1047.65 | 1126.8  | 1010.7  | 1265.15 | 1158.25 | 1057.01 | 1063.2  | 381.55 | 262.82 | 323.09 |
| 1-2.c36944/1/1370  | --                               | --        | --          | 5.08   | 70.4   | 10.8    | 13.27   | 4.78    | 5.32    | 28.89   | 23.31   | 27.77   | 187.65 | 110.38 | 63.32  |
| 1-2.c51854/1/1686  | PREDICTED: serine--tRNA          | 602647281 | XP_00743006 | 35.57  | 96.07  | 42.39   | 33.19   | 27.04   | 87.22   | 32.28   | 32.35   | 30.8    | 5.44   | 8.79   | 13.2   |
| 2-3.c36746/1/2056  | PREDICTED: protein-tyrosin       | 847100370 | XP_01281254 | 0      | 0      | 0       | 0.29    | 0       | 0       | 2.49    | 0       | 0.42    | 5.27   | 4.76   | 2.41   |
| 2-3.c42938/1/1892  | PREDICTED: saccharopine c        | 512842692 | XP_00293153 | 4.95   | 28.43  | 4.51    | 1.11    | 6.93    | 7.71    | 0       | 4.77    | 0       | 0      | 0      | 0      |
| 3-6.c15981/1/2918  | --                               | --        | --          | 3.73   | 8.52   | 2.86    | 11.66   | 2.19    | 7.94    | 2.35    | 4.56    | 5.09    | 1.04   | 1.47   | 0.5    |
| 3-6.c5648/1/3103.2 | PREDICTED: N-alpha-acetyl        | 602661561 | XP_00743643 | 1.15   | 5.35   | 3.4     | 1.85    | 1.83    | 6.6     | 0.21    | 2.51    | 2.62    | 0      | 0.21   | 0.16   |
| 1-2.c2708/15/1716  | PREDICTED: tubulin beta-5        | 558136461 | XP_00611755 | 33.58  | 86.58  | 10.82   | 17.87   | 18.4    | 35.16   | 10.29   | 18.23   | 10.74   | 9.04   | 0.62   | 7.21   |
| 2-3.c9373/3/2072   | OTTXETP00000002159 [Xe           | 89272520  | CAJ83768.1  | 0.46   | 8.03   | 0       | 2.98    | 0.45    | 2.93    | 5.77    | 2.69    | 3.37    | 31.33  | 33.06  | 23.72  |
| 1-2.c21044/1/1472  | PREDICTED: LOW QUALI             | 512849980 | XP_00294276 | 3.58   | 4.48   | 0       | 0       | 0       | 0       | 3.05    | 2.62    | 0       | 5.93   | 11.61  | 0      |
| 2-3.c7732/3/2477   | PREDICTED: spectrin beta c       | 512862388 | XP_00293694 | 10.18  | 35.32  | 17.56   | 5.65    | 8.07    | 13.03   | 5.31    | 14.39   | 8.23    | 0      | 1.83   | 3.91   |
| 1-2.c13076/1/1464  | --                               | --        | --          | 0.65   | 4.74   | 0.68    | 0.83    | 0.35    | 1.23    | 3.46    | 0.41    | 1.9     | 14.16  | 23.17  | 7.83   |
| 2-3.c34489/1/2472  | PREDICTED: myoferlin isof        | 847141448 | XP_01282127 | 0      | 0.97   | 0       | 1.28    | 0.81    | 0       | 1.36    | 0.37    | 0       | 0      | 0      | 0      |
| 1-2.c18725/2/1523  | PREDICTED: cytosolic 5'-nu       | 301624828 | XP_0029417C | 11.79  | 1.21   | 6.47    | 25.58   | 22.34   | 6.9     | 13.39   | 9.63    | 12.5    | 2.68   | 6.04   | 5.19   |
| 2-3.c21510/1/2540  | Nek2A [Xenopus laevis]           | 4760557   | BAA77339.1  | 0      | 0.14   | 0       | 0       | 1.05    | 2.09    | 0       | 1.23    | 0       | 0      | 0      | 0      |
| 2-3.c42098/1/2682  | PREDICTED: calcium unipo         | 847175711 | XP_00492048 | 25.01  | 22.45  | 23.27   | 17.69   | 20.13   | 27.09   | 12.45   | 14.16   | 14.11   | 3.5    | 4.29   | 8.63   |
| 2-3.c25484/4/2544  | RNA helicase II/Gu [Xenopu       | 147899364 | NP_00108203 | 16.34  | 261.89 | 50.69   | 0.02    | 0.68    | 73.67   | 44.37   | 54.09   | 56.06   | 0      | 0      | 0      |
| 2-3.c62711/5/2197  | ATP-binding cassette sub-fan     | 148226825 | NP_00108764 | 0      | 0.16   | 16.24   | 22.28   | 0.14    | 0.06    | 22.55   | 19.37   | 15.16   | 0      | 0      | 0      |
| 1-2.c20946/1/1362  | --                               | --        | --          | 0      | 0.69   | 24.7    | 30.71   | 0       | 0.14    | 45.47   | 28.9    | 19.33   | 0      | 0      | 0      |
| 2-3.c36559/1/2016  | --                               | --        | --          | 134.01 | 13.29  | 776.57  | 284.44  | 674.28  | 24.82   | 1306.57 | 1788.63 | 1198.09 | 22.36  | 21.22  | 26.28  |
| 1-2.c13270/1/1732  | RecName: Full=Large prolin       | 317374854 | A4IH17.1    | 0      | 0      | 10.53   | 14.48   | 0       | 0       | 13.53   | 14.03   | 14.17   | 0      | 0      | 0      |
| 3-6.c9618/1/5618   | myosin, heavy chain 4, skelet    | 47575800  | NP_00100124 | 1.97   | 0.22   | 20.25   | 10.61   | 8.56    | 0.06    | 23.81   | 13.03   | 16.14   | 0.54   | 0.23   | 0.04   |
| 1-2.c32537/2/141C  | perostin precursor [Xenopus      | 163915007 | NP_00110637 | 54.1   | 0      | 38.17   | 88.45   | 21.88   | 0       | 84.8    | 77.69   | 126.87  | 5.56   | 0      | 0      |
| 3-6.c9552/1/4253.1 | myosin-binding protein C, ca     | 163915017 | NP_00110637 | 63.23  | 2.21   | 97.85   | 211.78  | 138.55  | 0       | 147.26  | 102.2   | 186.53  | 0.88   | 0.24   | 9.23   |
| 1-2.c1981/40/1644  | PREDICTED: 2-oxoisovaler         | 847152594 | XP_01282325 | 0      | 21.68  | 10.46   | 11.49   | 0.22    | 0       | 10.81   | 8.03    | 9.47    | 0      | 0      | 0      |
| 3-6.c17820/2/3854  | PREDICTED: myosin-4 [Xe          | 847156920 | XP_01282446 | 1.01   | 0.06   | 9.24    | 5.7     | 3.2     | 0.07    | 12.48   | 8.18    | 8.83    | 0.01   | 0.07   | 0.46   |
| 2-3.c20612/1/2325  | abhydrolase domain-containi      | 349501031 | NP_00100677 | 0.12   | 0      | 3.52    | 3.35    | 0.07    | 0.08    | 4.71    | 5.09    | 6.07    | 0      | 0      | 0      |
| 2-3.c35777/1/2117  | --                               | --        | --          | 0.79   | 86.91  | 0.65    | 0.45    | 0.66    | 26.77   | 0.85    | 0.17    | 0.96    | 121.57 | 51.14  | 135.76 |
| 1-2.c7335/1/1871   | PREDICTED: reticulon-4 iso       | 847127971 | XP_01281854 | 0      | 8.25   | 0       | 0       | 0       | 7.7     | 0       | 0       | 0       | 12.18  | 18.12  | 14.46  |
| 3-6.c19096/10/2961 | PREDICTED: myosin-bindin         | 564233250 | XP_00626095 | 130.77 | 3.9    | 241.13  | 247.47  | 119.81  | 0       | 201.39  | 133.05  | 167.88  | 9      | 5.22   | 7.3    |
| 3-6.c16742/1/2778  | PREDICTED: myosin-bindin         | 701407466 | XP_00999782 | 82.24  | 0.02   | 38.86   | 157.98  | 83.39   | 0       | 148.81  | 80.66   | 187.8   | 6.27   | 0      | 11.09  |
| 1-2.c52068/1/1916  | PREDICTED: lymphocyte ar         | 301620254 | XP_00293945 | 0      | 0.84   | 9.55    | 15.48   | 0       | 0.38    | 18.01   | 10.93   | 17.88   | 0.71   | 0      | 0.23   |
| 1-2.c42924/2/1448  | PREDICTED: 2-oxoisovaler         | 847152594 | XP_01282325 | 0.2    | 13.17  | 5.06    | 8.72    | 0.13    | 0       | 9.18    | 6.66    | 8.27    | 0      | 0      | 0      |
| 2-3.c35753/1/2219  | --                               | --        | --          | 3.25   | 0      | 16.92   | 8.72    | 1.18    | 0       | 4.78    | 8.59    | 7.54    | 0      | 0      | 0.16   |
| 2-3.c50575/1/2194  | nitrogen fixation cluster-like   | 147903789 | NP_0010807C | 23.24  | 0.42   | 44.11   | 0.22    | 36.76   | 24.09   | 18.8    | 16.64   | 13.28   | 1.43   | 0      | 0      |
| 2-3.c13340/1/2000  | PREDICTED: valine--tRNA          | 512859726 | XP_00293951 | 0.05   | 0      | 3.69    | 3.89    | 0.04    | 0.01    | 9.03    | 4.38    | 3.02    | 0      | 0      | 0      |
| 2-3.c16992/1/1989  | PREDICTED: lymphocyte ar         | 301620254 | XP_00293945 | 17.52  | 53.92  | 9.34    | 8.43    | 32.88   | 140.84  | 14.73   | 4.22    | 8.97    | 466.67 | 597.46 | 570.38 |
| 2-3.c7869/1/2116   | --                               | --        | --          | 11.22  | 0.05   | 0.04    | 0.1     | 14.85   | 110.29  | 0.12    | 0.05    | 0.18    | 23.12  | 19.37  | 17.62  |
| 2-3.c1891/31/2009  | kelch-like protein 41 [Xenop     | 45361273  | NP_989214.1 | 50.87  | 136.44 | 117.72  | 39.89   | 69.76   | 328.6   | 57.67   | 59.29   | 84.6    | 2.09   | 8.09   | 2.67   |
| 2-3.c33847/3/2274  | --                               | --        | --          | 2.94   | 5.09   | 6.96    | 3.63    | 5.74    | 47.04   | 3.81    | 4.18    | 6.05    | 0.09   | 0      | 0      |
| 1-2.c29294/1/1849  | PREDICTED: tropoelastin 2        | 847162855 | XP_01282565 | 186.5  | 1.72   | 80.1    | 157.23  | 42.1    | 0.39    | 174.4   | 288.63  | 212.35  | 21.7   | 4.32   | 19.68  |
| 2-3.c6342/1/2749   | PREDICTED: ankyrin repeat        | 512839176 | XP_00293505 | 37.23  | 3.03   | 13.37   | 13.78   | 21.54   | 0.65    | 13.25   | 25.4    | 22.89   | 0.88   | 1.6    | 0.97   |
| 1-2.c20717/1/1367  | chaperonin containing TCPI,      | 148232533 | NP_00108038 | 480.04 | 25.92  | 2514.53 | 823.93  | 1767.23 | 52.94   | 505.84  | 768.69  | 498.63  | 49.29  | 7.49   | 66.87  |
| 1-2.c20014/5/1404  | PREDICTED: creatine kinas        | 847154911 | XP_01282398 | 12.78  | 6.9    | 23.99   | 28.49   | 18.19   | 0.39    | 49.14   | 39.84   | 20.15   | 3.82   | 0      | 1.55   |
| 2-3.c9170/2/2393   | LOC446249 protein, partial [     | 50418068  | AAH78090.1  | 9      | 0.66   | 0.1     | 0       | 3.43    | 4.25    | 5.42    | 12.17   | 8.7     | 0      | 0      | 0.34   |
| 1-2.c7655/1/1844   | --                               | --        | --          | 12.27  | 0.59   | 38.15   | 34.77   | 7.98    | 4.27    | 17.7    | 34.27   | 27.83   | 3      | 0.85   | 0.5    |
| 1-2.c33303/3/1401  | PREDICTED: valine--tRNA          | 512859726 | XP_00293951 | 0.11   | 0      | 4.53    | 3.67    | 0       | 0       | 9.29    | 4.97    | 4.57    | 0      | 0      | 0      |
| 3-6.c16111/1/4289  | myosin-binding protein C, ca     | 767806579 | NP_990447.2 | 15.86  | 0      | 39.21   | 14.65   | 12.99   | 0       | 12.22   | 10.47   | 12.98   | 0      | 0      | 1.72   |
| 1-2.c17930/1/1384  | plasmaogen activator inhibit     | 47575766  | NP_00100122 | 0      | 219.29 | 136.15  | 0.01    | 105.77  | 116.87  | 74.68   | 95.61   | 158.46  | 0.96   | 0      | 19.08  |
| 3-6.c8043/1/2777.1 | uncharacterized protein LOC      | 194332743 | NP_00112366 | 811.39 | 41.64  | 3809.8  | 1711.11 | 3050.95 | 72.73   | 3310.86 | 5812.12 | 3318.67 | 155.18 | 55.94  | 136.71 |

|                    |                                |           |             |         |         |          |         |          |         |         |          |         |        |        |        |
|--------------------|--------------------------------|-----------|-------------|---------|---------|----------|---------|----------|---------|---------|----------|---------|--------|--------|--------|
| 1-2.c25247/1/1321  | RecName: Full=Large prolin     | 317374854 | A4IH17.1    | 11.58   | 12.14   | 0        | 0       | 1.51     | 11.52   | 2.27    | 0        | 0       | 48.03  | 68.17  | 46.53  |
| 3-6.e17084/1/7453  | myosin-binding protein C, ca   | 767806579 | NP_990447.2 | 26.82   | 0.57    | 0.44     | 51.54   | 33.27    | 4.35    | 68.81   | 38.13    | 72.92   | 5.07   | 4.53   | 4.38   |
| 1-2.c31108/1/1528  | PREDICTED: myosin-4 [Xet       | 847156920 | XP_01282446 | 275.41  | 6.97    | 408.64   | 229.4   | 293.81   | 0.93    | 337.82  | 352.98   | 353.89  | 20.35  | 19.19  | 45.74  |
| 1-2.c20658/2/1592  | --                             | --        | --          | 0       | 13.18   | 0.64     | 43.04   | 3.5      | 0       | 10.99   | 8.45     | 27.18   | 0      | 0      | 0      |
| 3-6.e3344/2/3579   | PREDICTED: myosin-4-like       | 301611451 | XP_00293525 | 163.81  | 5.89    | 227.26   | 127.92  | 165.26   | 1.33    | 243.04  | 246.22   | 224.81  | 12.12  | 18.77  | 30.92  |
| 1-2.c48927/1/1618  | uncharacterized protein LOC    | 194332743 | NP_00112366 | 1589.89 | 56.96   | 9491.02  | 3491.42 | 5942.57  | 93.13   | 2876.26 | 5086.85  | 3116.36 | 189.16 | 25.39  | 265.38 |
| 2-3.c51093/3/2154  | PREDICTED: beta-enolase [.     | 637381761 | XP_00812393 | 1073.05 | 66.64   | 2429.69  | 4350.59 | 2514.65  | 638.64  | 1872.93 | 1860.06  | 3596.95 | 234.32 | 12.63  | 361.6  |
| 3-6.e15132/1/2685  | PREDICTED: myosin-4-like       | 301611451 | XP_00293525 | 1.64    | 0.26    | 16.6     | 10      | 6.79     | 0       | 13.3    | 6.78     | 7.39    | 0.44   | 0.44   | 0.37   |
| 1-2.c48018/53/1468 | PREDICTED: beta-enolase [.     | 637381761 | XP_00812393 | 140.16  | 0       | 22.06    | 90.19   | 58.17    | 18.3    | 431.92  | 242.14   | 218.92  | 53.03  | 32.88  | 0.2    |
| 2-3.c26384/1/2382  | PREDICTED: ankyrin repeat      | 512839176 | XP_00293505 | 8       | 2.07    | 2.45     | 3.69    | 4.43     | 0       | 4.06    | 4.75     | 7.76    | 0      | 0      | 0.28   |
| 1-2.c40274/1/1440  | --                             | --        | --          | 0       | 5.63    | 3.18     | 1.56    | 0        | 0       | 0       | 0        | 0       | 13.16  | 15.91  | 6      |
| 2-3.c13240/1/2285  | myosin, heavy chain 2, skelet  | 55742222  | NP_00100680 | 17.78   | 0.63    | 25.99    | 12.1    | 21.05    | 0.22    | 29.9    | 36.01    | 21.97   | 1.51   | 2.28   | 2.94   |
| 2-3.c24309/1/2344  | --                             | --        | --          | 1.27    | 64.39   | 2.21     | 1.16    | 0.55     | 19.51   | 0.35    | 0.75     | 1.43    | 38.56  | 31.54  | 60.53  |
| 1-2.c50845/5/1507  | --                             | --        | --          | 15.76   | 4.95    | 21.26    | 93.46   | 42.83    | 4.98    | 82.1    | 64.86    | 71.27   | 9.84   | 0      | 7.28   |
| 2-3.c17603/1/2111  | abhydrolase domain-containi    | 349501031 | NP_00100677 | 0       | 0       | 3.81     | 5.84    | 0.02     | 0       | 3.01    | 3.23     | 3.33    | 0      | 0      | 0      |
| 2-3.c9545/1/2343.2 | --                             | --        | --          | 48.73   | 10.5    | 5.84     | 7.33    | 0        | 0       | 0       | 0        | 0.12    | 36.33  | 30.48  | 12.84  |
| 1-2.c35180/1/7192  | uncharacterized protein LOC    | 194332743 | NP_00112366 | 3719.61 | 149.71  | 17741.66 | 7230.35 | 12951.88 | 229.82  | 6655.07 | 10108.39 | 5762    | 709.5  | 127.96 | 678.45 |
| 3-6.c13888/1/2922  | PREDICTED: myosin-bindin       | 733889284 | XP_01070973 | 47.33   | 0       | 58.07    | 148.22  | 59.79    | 0       | 116.93  | 62.97    | 120.7   | 5.69   | 4.46   | 16.67  |
| 1-2.c12422/1/1659  | --                             | --        | --          | 3.06    | 20.99   | 31.07    | 17.76   | 24.77    | 106.5   | 53.14   | 18.94    | 34.69   | 2.95   | 0.68   | 3.33   |
| 3-6.e2723/1/3922   | myosin, heavy chain 4, skelet  | 47575800  | NP_00100124 | 0.27    | 0       | 3.45     | 1.18    | 0.74     | 0       | 3.48    | 1.56     | 1.3     | 0      | 0      | 0.06   |
| 1-2.c18770/1/1544  | Unknown (protein for MGC:1     | 213626057 | AAI70388.1  | 46.02   | 0       | 45.97    | 63.79   | 16.63    | 0       | 23.67   | 25.77    | 37.59   | 3.56   | 0      | 2.6    |
| 2-3.c17128/1/2579  | PREDICTED: myosin-4 [Xet       | 847156920 | XP_01282446 | 158.54  | 61.85   | 92.26    | 40.97   | 67.32    | 8.62    | 58.63   | 71.68    | 55.98   | 7.18   | 11.48  | 2.49   |
| 2-3.c54300/1/2079  | probable C->U-editing enzym    | 55741924  | NP_00100672 | 38.82   | 61.75   | 80.95    | 35.88   | 50.39    | 267.75  | 31.3    | 41.57    | 50.88   | 3.33   | 2.99   | 3.41   |
| 2-3.c27739/1/1741  | breast cancer anti-estrogen re | 147906605 | NP_00108515 | 2.35    | 2.59    | 0        | 0       | 2.77     | 1.13    | 3.05    | 4.85     | 2.1     | 0      | 0      | 0      |
| 3-6.c3860/2/4633   | myosin, heavy chain 4, skelet  | 47575800  | NP_00100124 | 1.44    | 0       | 5.28     | 1.73    | 2.39     | 0       | 3.27    | 4.48     | 3.5     | 0.16   | 0      | 0.39   |
| 3-6.c3365/2/3324   | collagen, type 1, alpha 2 prec | 147898763 | NP_00108072 | 11.8    | 161.14  | 43.36    | 39.17   | 41.65    | 315.78  | 46.06   | 31.92    | 50.46   | 5.99   | 3.6    | 3.85   |
| 2-3.c20093/1/1862  | PREDICTED: lymphocyte ar       | 301620254 | XP_00293945 | 0.11    | 0       | 3.3      | 6.96    | 0        | 0       | 9.4     | 3.63     | 5.91    | 0.32   | 0      | 0.18   |
| 1-2.c3756/7/1301   | APG4A protein [Xenopus lae     | 213626921 | AAI70397.1  | 12.64   | 1.78    | 3.48     | 1.29    | 11.22    | 0.16    | 4.15    | 4.06     | 7.02    | 0      | 0      | 0      |
| 2-3.c24303/1/2299  | PREDICTED: beta-enolase [.     | 637381761 | XP_00812393 | 297.14  | 25.9    | 869.63   | 1540.29 | 876.68   | 182.03  | 761.25  | 586.06   | 1184.84 | 135.2  | 34.09  | 116.47 |
| 1-2.c45413/1/1426  | mitochondrial 2-oxoglutarate   | 71895777  | NP_00102568 | 126.01  | 35.02   | 140.03   | 151.66  | 73.17    | 23.96   | 46.04   | 83.39    | 82.77   | 5.92   | 4.17   | 11.84  |
| 3-6.c3464/2/3022   | PREDICTED: collagen alpha      | 847166754 | XP_01282667 | 3.75    | 52.7    | 8.23     | 5.39    | 0        | 17.95   | 1.67    | 4.19     | 2.62    | 0      | 0.12   | 0      |
| 2-3.c7871/6/2737   | PREDICTED: CD99 antigen-       | 301623490 | XP_00294104 | 12.81   | 0       | 0        | 8.94    | 0        | 0       | 9.38    | 13.48    | 11.34   | 0      | 0      | 2.39   |
| 1-2.c16487/6/1579  | --                             | --        | --          | 0       | 0       | 0        | 0       | 0        | 4.72    | 0       | 0        | 0       | 9.01   | 11.55  | 5.76   |
| 2-3.c10107/21/2517 | Unknown (protein for IMAG      | 197246230 | AAI68800.1  | 325.06  | 6.02    | 230.65   | 493.05  | 307.98   | 29.68   | 181.81  | 262.7    | 316.14  | 18.71  | 14.78  | 55.95  |
| 1-2.e18043/3/1368  | PREDICTED: complement c3       | 512820694 | XP_00293686 | 6.46    | 0       | 0        | 0       | 6.17     | 0       | 10.74   | 8.01     | 4.41    | 0      | 0      | 0.46   |
| 2-3.c25818/1/2190  | PREDICTED: collagen alpha      | 847138882 | XP_01282086 | 13.32   | 0.49    | 29.96    | 29      | 5.58     | 0       | 17.46   | 31.85    | 25.63   | 3.46   | 0.2    | 1.52   |
| 2-3.c36786/1/2098  | uncharacterized protein LOC    | 148232016 | NP_00109117 | 380.96  | 12.62   | 82.59    | 291.34  | 298.11   | 28.71   | 161.1   | 305.04   | 344.83  | 0.01   | 103.79 | 2.77   |
| 1-2.c21168/1/1364  | LOC100037225 protein [Xen      | 125858810 | AAI29772.1  | 77.37   | 81.54   | 116.02   | 76.96   | 23.39    | 20.13   | 40.92   | 84.02    | 58.49   | 5.52   | 2.41   | 3.47   |
| 1-2.c1846/27/1308  | PREDICTED: tenomodulin [.      | 847171214 | XP_01280901 | 46.74   | 172.8   | 65.57    | 24.49   | 20.02    | 101.73  | 21.85   | 31.88    | 31.56   | 2.33   | 3.9    | 1.72   |
| 1-2.c48429/1/1775  | PREDICTED: myosin-bindin       | 524998837 | XP_00504717 | 78.86   | 0       | 26.47    | 151.89  | 82.64    | 0       | 92.12   | 60.18    | 133.48  | 18.63  | 5.45   | 9.76   |
| 1-2.e18849/1/1796  | phosphatidylethanolamine bir   | 148232176 | NP_00108562 | 0.14    | 1.86    | 1.36     | 0       | 1.4      | 4.67    | 3.64    | 1.85     | 3.9     | 0      | 0      | 0      |
| 2-3.c22369/1/2361  | PREDICTED: mRNA-decap          | 512826563 | XP_00293814 | 0       | 0       | 0        | 4.08    | 0        | 0.56    | 0       | 0        | 0       | 4.76   | 12.29  | 5.5    |
| 2-3.c36559/1/2016  | uncharacterized protein LOC    | 194332743 | NP_00112366 | 793.38  | 47.57   | 4469.58  | 1495.21 | 2854.04  | 73.99   | 2694.28 | 5840.58  | 2881.9  | 59.21  | 20.36  | 90.88  |
| 2-3.c39771/1/2258  | --                             | --        | --          | 0.65    | 0       | 0        | 2.76    | 0        | 0       | 0       | 0        | 0       | 6.7    | 2.03   | 6.48   |
| 3-6.c13952/1/5500  | PREDICTED: myosin, heavy       | 847172850 | XP_01280963 | 32.06   | 4229.42 | 30.68    | 35.28   | 27.17    | 24866.5 | 29.21   | 19.58    | 26.62   | 4.86   | 3.38   | 0.56   |
| 1-2.c29423/2/1350  | --                             | --        | --          | 2       | 0       | 0        | 0       | 0        | 10.68   | 0       | 0        | 0.51    | 31.73  | 39.02  | 12.23  |
| 1-2.c22130/1/1428  | --                             | --        | --          | 0       | 0       | 2.45     | 2.95    | 0        | 0       | 4.58    | 3.43     | 3.88    | 0      | 0      | 0      |
| 1-2.c4006/1/1598   | PREDICTED: nebulin isofor      | 847166508 | XP_01282661 | 50.43   | 26.36   | 4.33     | 64.49   | 0        | 0       | 24.23   | 15.41    | 29.38   | 1.84   | 0.9    | 3.27   |
| 2-3.c54140/1/2109  | PREDICTED: myosin-4 [Xet       | 847156920 | XP_01282446 | 824.62  | 26.86   | 884.1    | 804.22  | 701.34   | 6.04    | 1045.01 | 1111.32  | 944.94  | 133.92 | 133.74 | 161.83 |
| 1-2.c52026/3/1548  | --                             | --        | --          | 21.36   | 72.74   | 34.59    | 22.57   | 12.39    | 68.07   | 21.17   | 31.97    | 5.91    | 1.33   | 1.53   |        |
| 2-3.c36849/1/2078  | PREDICTED: target of Nesh      | 847100396 | XP_01281255 | 3.79    | 20.24   | 4.34     | 4.53    | 4.03     | 30.75   | 3.46    | 4.74     | 5.97    | 0      | 0.24   | 0.21   |
| 2-3.c42999/1/2072  | nicotinamide nucleotide trans  | 148231869 | NP_00108770 | 37.76   | 29.97   | 0.38     | 58.81   | 0.47     | 0.19    | 25.56   | 51.04    | 24.97   | 2.35   | 0.36   | 0      |
| 2-3.c50513/2/2030  | myosin heavy chain, partial [  | 4249697   | AAD13770.1  | 0       | 0.32    | 12.89    | 4.77    | 4.82     | 0.09    | 9.44    | 2.7      | 5.05    | 0.47   | 0      | 0      |
| 3-6.c5852/1/3083   | claudin 4 [Bufo japonicus]>g   | 407031622 | AFS68371.1  | 19.09   | 4.96    | 0        | 17.52   | 0        | 0       | 20.82   | 24.89    | 12.23   | 0      | 0      | 5.93   |
| 2-3.c36986/3/2484  | PREDICTED: collagen alpha      | 591360730 | XP_00705528 | 4.76    | 49.33   | 9.29     | 4.01    | 4.87     | 28.25   | 3.11    | 5.12     | 7.34    | 0      | 0      | 0.71   |
| 2-3.c34195/1/2653  | PREDICTED: G0/G1 switch        | 704472928 | XP_01007157 | 4.82    | 30.19   | 6.25     | 18.76   | 14.17    | 29.66   | 9.21    | 5.03     | 8.09    | 225.84 | 218.83 | 242.59 |
| 3-6.c16458/1/6542  | myosin, heavy chain 4, skelet  | 47575800  | NP_00100124 | 2.15    | 0       | 9.17     | 5.51    | 4.8      | 0       | 9.26    | 5.81     | 5.19    | 0.46   | 1.29   | 0.18   |
| 2-3.c6649/1/1974   | solute carrier family 41, mem  | 147907304 | NP_00108547 | 35.69   | 51.07   | 55.37    | 26.46   | 34.22    | 122.96  | 49.8    | 36.55    | 56.11   | 7.27   | 6.28   | 4.45   |

|                    |                                 |           |             |          |         |          |         |          |          |          |          |          |        |         |         |
|--------------------|---------------------------------|-----------|-------------|----------|---------|----------|---------|----------|----------|----------|----------|----------|--------|---------|---------|
| 3-6.c18298/1/3309  | calpain 1, large subunit [Xenc  | 61889135  | NP_00101363 | 9.28     | 0.63    | 3.62     | 0.72    | 8.44     | 6.03     | 2.79     | 6.33     | 5.89     | 0.68   | 0       | 0.38    |
| 2-3.c19688/1/2393  | isovaleryl-CoA dehydrogenas     | 58332612  | NP_00101138 | 23.37    | 8.86    | 11.14    | 8.35    | 0.66     | 3.2      | 11.1     | 9.63     | 13.42    | 0      | 3       | 0       |
| 1-2.c25617/1/1485  | --                              | --        | --          | 0        | 3.09    | 0.22     | 0.43    | 0.39     | 3.3      | 0.25     | 0        | 0.74     | 18.81  | 20.3    | 18.88   |
| 1-2.c50742/1/1284  | periostin precursor [Xenopus    | 163915007 | NP_00110637 | 28.17    | 0       | 0.13     | 36.71   | 4.77     | 0        | 28.6     | 33.62    | 29.92    | 0.96   | 4.21    | 4.81    |
| 2-3.c32515/1/2162  | PREDICTED: H/ACA ribon          | 602655291 | XP_00743335 | 16.93    | 0.41    | 14.13    | 0       | 12.32    | 29.89    | 14.19    | 15.4     | 11.74    | 1.88   | 2.91    | 0       |
| 1-2.c17584/1/1489  | PREDICTED: tropoelastin 2       | 847162847 | XP_01282565 | 168.73   | 3.63    | 71.73    | 96.93   | 56.63    | 1.01     | 176.95   | 252.61   | 185.74   | 33.72  | 30.53   | 29.83   |
| 1-2.c48185/2/1779  | PREDICTED: myosin-4 [Xer        | 847156920 | XP_01282446 | 923.63   | 27.09   | 983.84   | 1013.07 | 816.66   | 7.54     | 1399.17  | 1326.36  | 1163.81  | 206.48 | 196.08  | 206.34  |
| 2-3.c62798/10/2219 | PREDICTED: integrin beta-li     | 512821557 | XP_00293713 | 8.75     | 0       | 8.71     | 0.5     | 3.51     | 0        | 3.56     | 4.88     | 4.77     | 0.38   | 0.22    | 0       |
| 1-2.c13485/3/1428  | --                              | --        | --          | 12.02    | 2.29    | 0        | 3.34    | 0        | 9.62     | 3.76     | 9.38     | 11.6     | 1.14   | 0       | 0       |
| 1-2.c37153/7/1450  | --                              | --        | --          | 6.84     | 50.48   | 7.94     | 1.17    | 4.01     | 48.79    | 8.97     | 5.61     | 6.47     | 0.84   | 0       | 0       |
| 1-2.c50366/1/1808  | uncharacterized protein LOC     | 147906248 | NP_00108473 | 0.48     | 14.39   | 0.95     | 1.08    | 0        | 0        | 0        | 0        | 0        | 6.74   | 3.22    | 8.32    |
| 1-2.c8908/13/1602  | PREDICTED: pyruvate dehy        | 530574464 | XP_00528162 | 14.82    | 3.43    | 27.86    | 8.2     | 22.73    | 4.29     | 14.92    | 10.13    | 12.21    | 1.4    | 0       | 1.56    |
| 1-2.c10740/6/1348  | glioma tumor suppressor canc    | 148228700 | NP_00109002 | 79.3     | 124.94  | 66.51    | 82.23   | 0.95     | 0.18     | 90.74    | 75.73    | 65.43    | 0.35   | 0       | 28.21   |
| 2-3.c41897/1/2274  | myosin, heavy chain 2, skelet   | 55742222  | NP_00100680 | 12.17    | 6.39    | 8.42     | 2.7     | 6.99     | 1.29     | 5.66     | 7.35     | 2.85     | 0.38   | 0.54    | 0       |
| 1-2.c19900/1/1332  | ectonucleotide pyrophosphat     | 147901695 | NP_00109016 | 1.5      | 35.65   | 0        | 0.08    | 0        | 8.58     | 1.32     | 0        | 1.33     | 39.55  | 24.96   | 34.92   |
| 3-6.c15820/1/2998  | PREDICTED: myomegalin-li        | 847014351 | XP_01280435 | 17.05    | 30.46   | 21.62    | 9.37    | 23.59    | 57.5     | 15.04    | 22.6     | 12.13    | 2.9    | 1.66    | 2.03    |
| 2-3.c45527/1/2271  | PREDICTED: myosin-4 [Xer        | 847156920 | XP_01282446 | 1.88     | 0       | 8.46     | 7.68    | 7.92     | 0        | 5.84     | 8.44     | 7.47     | 0.43   | 0.59    | 0.74    |
| 1-2.c13297/4/1763  | PREDICTED: chordin-like pr      | 847153124 | XP_01282342 | 13.32    | 1.35    | 16.27    | 4.64    | 11.3     | 1.54     | 7.99     | 5.5      | 7.1      | 0.02   | 1.23    | 0       |
| 2-3.c11963/1/2084  | --                              | --        | --          | 0        | 0       | 0        | 0.04    | 3.13     | 3.53     | 3.15     | 4        | 3.86     | 0      | 0.43    | 0       |
| 1-2.c34152/1/1435  | LOC100101331 protein [Xen       | 148921625 | AAI46634.1  | 6.06     | 0.01    | 5.82     | 0       | 0.32     | 0.46     | 0        | 0        | 0        | 8.77   | 4.69    | 7.81    |
| 1-2.c19423/1/6971  | PREDICTED: beta-enolase [       | 637381761 | XP_00812393 | 775.67   | 71.59   | 1492.86  | 3194.74 | 1659.55  | 453.69   | 1279.76  | 1126.69  | 2261.9   | 299.76 | 117.16  | 325.19  |
| 3-6.c19043/1/2909  | myosin, heavy chain 4, skelet   | 47575800  | NP_00100124 | 0.98     | 0.37    | 4.91     | 2.29    | 1.75     | 0        | 5.21     | 2.59     | 1.86     | 0.19   | 0       | 0.2     |
| 2-3.c55363/1/2084  | --                              | --        | --          | 2.98     | 5.97    | 5.02     | 0       | 2.9      | 5.81     | 2.37     | 2.32     | 4.12     | 0.14   | 0       | 0       |
| 3-6.c18354/1/3309  | PREDICTED: myozenin-2 is        | 847087249 | XP_01281675 | 15.39    | 29.16   | 25.28    | 10.41   | 12.96    | 40.92    | 19.05    | 20.58    | 18.77    | 3.88   | 1.94    | 2.62    |
| 2-3.c5846/1/2071   | PREDICTED: protein Wnt-5i       | 821108369 | XP_01237937 | 0.2      | 0.02    | 0        | 0       | 0        | 0.99     | 0        | 0        | 0        | 3.93   | 2.92    | 6.94    |
| 1-2.c7623/1/1812   | --                              | --        | --          | 0        | 0       | 2.81     | 5.07    | 0        | 0        | 2.78     | 2.64     | 4.15     | 0.1    | 0       | 0       |
| 2-3.c33743/1/2566  | --                              | --        | --          | 0        | 0       | 0        | 1.25    | 0        | 0.22     | 0.01     | 0        | 0        | 3.83   | 2.75    | 4.09    |
| 2-3.c9413/1/1914   | PREDICTED: tropoelastin 2       | 847162839 | XP_01282564 | 49.39    | 4.05    | 43.77    | 99.91   | 9.97     | 0.75     | 71.95    | 85.19    | 110.08   | 6.56   | 3.22    | 29.09   |
| 1-2.c17576/1/1462  | PREDICTED: LOW QUALI            | 696973019 | XP_00955636 | 0        | 0       | 0.08     | 5.57    | 4.05     | 0        | 0.01     | 0        | 0        | 35.38  | 30.37   | 25.36   |
| 2-3.c51195/2/2196  | PREDICTED: glycogen debr        | 847125942 | XP_01281792 | 27.27    | 2.06    | 18.7     | 57.86   | 34.38    | 8.89     | 29.2     | 29.82    | 60.81    | 6.33   | 4.6     | 5.75    |
| 3-6.c15947/1/3380  | myosin, heavy chain 2, skelet   | 55742222  | NP_00100680 | 64.29    | 34.14   | 33.34    | 13.42   | 26.32    | 2.24     | 18.56    | 33.66    | 15.09    | 1.92   | 0       | 0.21    |
| 2-3.c55224/1/2053  | PREDICTED: glucocorticoid       | 847109993 | XP_01281452 | 2.36     | 3.22    | 2.64     | 0.84    | 0        | 3.03     | 3.6      | 1.71     | 1.7      | 0      | 0       | 0       |
| 2-3.c60141/1/2047  | MGC84135 protein precursor      | 148228231 | NP_00108615 | 0        | 0.69    | 0        | 0       | 1.24     | 5.52     | 0        | 0        | 1.45     | 22.34  | 22.49   | 10.77   |
| 2-3.c59709/1/2634  | uncharacterized protein LOC     | 147905311 | NP_00109066 | 0.11     | 2.37    | 0        | 0       | 2.48     | 3.27     | 0        | 0.32     | 0        | 6.12   | 10.65   | 17.08   |
| 2-3.c20067/2/2196  | PREDICTED: collagen alpha       | 701292594 | XP_01002215 | 9.08     | 191.84  | 22.02    | 10.03   | 16.35    | 113.54   | 16.49    | 26.26    | 24.81    | 8.69   | 0       | 1.04    |
| 3-6.c12471/173/377 | RecName: Full=Sarcoplasmic      | 9789732   | Q92105.1    | 905.22   | 371.15  | 591.84   | 519.54  | 696.89   | 642.54   | 1345.42  | 860.84   | 978.31   | 64.09  | 0       | 421.88  |
| 1-2.c1272/230/1630 | uncharacterized protein LOC     | 148232016 | NP_00109117 | 1073.96  | 32.41   | 119.87   | 566.2   | 477.44   | 45.17    | 1186.48  | 775.36   | 705.34   | 134.53 | 282.93  | 77.8    |
| 1-2.c20135/1/1549  | PREDICTED: myosin-3-like        | 847172866 | XP_01280963 | 2.15     | 477.2   | 2.58     | 3.27    | 2.49     | 2904.74  | 3.45     | 2.35     | 4.26     | 0.04   | 0       | 0       |
| 3-6.c13190/2/3804  | RecName: Full=Alcohol dehy      | 113364    | P22797.1    | 7.47     | 33.41   | 16.55    | 3.21    | 6.17     | 26.46    | 2.03     | 3.75     | 3.73     | 0.37   | 0       | 0.3     |
| 1-2.c13194/1/1379  | epiphycan precursor [Xenopu     | 54020763  | NP_00100562 | 5.25     | 18.24   | 18.74    | 14.52   | 2.86     | 2.09     | 7.94     | 20.31    | 14       | 1.18   | 0.49    | 0.28    |
| 2-3.c39649/1/2357  | myosin heavy chain, partial [   | 4249697   | AAD13770.1  | 56.73    | 4.86    | 763.91   | 469.41  | 243.54   | 6.45     | 924.67   | 238.3    | 344.31   | 4.43   | 6.61    | 4.16    |
| 1-2.c16610/3/1383  | --                              | --        | --          | 1.04     | 1.52    | 0        | 1.17    | 0        | 0        | 0        | 0        | 0        | 9.06   | 4.42    | 10.12   |
| 1-2.c30525/1/1433  | myosin heavy chain, partial [   | 4249695   | AAD13769.1  | 62.53    | 0.95    | 78.09    | 92.62   | 60.86    | 0.42     | 156.09   | 118.72   | 117.27   | 19.41  | 26.01   | 20.39   |
| 1-2.c49882/1/1439  | --                              | --        | --          | 15.42    | 0.32    | 38.31    | 32.64   | 10.72    | 0.4      | 28.14    | 35.77    | 39.53    | 7.19   | 5.4     | 2.4     |
| 1-2.c28080/1/3919  | glyceraldehyde-3-phosphate c    | 300679438 | ADK27487.1  | 24689.39 | 1262.15 | 19346.98 | 20729.1 | 26959.91 | 3442.12  | 15946.37 | 20298.43 | 23019.78 | 2990.8 | 1041.54 | 5625.32 |
| 1-2.c52493/1/1209  | myosin heavy chain, partial [   | 4249703   | AAD13773.1  | 34.55    | 4977.22 | 31.49    | 46.69   | 34.37    | 29892.13 | 34.22    | 21.69    | 27.92    | 7.25   | 2.6     | 0.64    |
| 2-3.c29621/1/4590  | PREDICTED: uncharacterize       | 847117050 | XP_01281612 | 0        | 1.13    | 0        | 1.74    | 0.41     | 0.03     | 0        | 0.43     | 0        | 7.38   | 12.02   | 10.73   |
| 3-6.c16357/3/3055  | LIM domain binding 3 [Xeno      | 147903867 | NP_00108023 | 1.98     | 10.76   | 17.31    | 15.25   | 23.46    | 92.06    | 34.28    | 17.06    | 19.79    | 1.44   | 0.2     | 7.84    |
| 3-6.c6802/2/3280   | PREDICTED: DDB1- and Cl         | 512862186 | XP_00293537 | 7.22     | 9.68    | 1.14     | 4.36    | 5.05     | 0.7      | 6.51     | 3.37     | 7.69     | 0.32   | 0.35    | 1.01    |
| 1-2.c51337/6/1392  | PREDICTED: pyruvate kinas       | 564240659 | XP_00627715 | 231.32   | 0       | 329.54   | 400.08  | 292      | 0        | 269.39   | 304.27   | 422.81   | 73.5   | 0       | 91.56   |
| 2-3.c49297/1/2496  | solute carrier family 38, mem   | 147900233 | NP_00108707 | 3.83     | 6.68    | 4.65     | 4.35    | 25.92    | 0.72     | 8.59     | 2.86     | 7.91     | 0.54   | 0.7     | 0.5     |
| 1-2.c37690/6/1591  | collagen, type II, alpha 1, par | 374533626 | AEZ53726.1  | 18.03    | 445.47  | 109.73   | 54.12   | 20.08    | 152.45   | 53.83    | 52.07    | 70.07    | 13.52  | 8.97    | 6.8     |
| 1-2.c45632/2/1804  | PREDICTED: alpha-actinin-:      | 558140024 | XP_00611831 | 47.45    | 37.69   | 28.54    | 23.12   | 10.43    | 27.62    | 155.44   | 83.92    | 147.63   | 25.51  | 4.54    | 32.77   |
| 3-6.c2417/1/3782   | PREDICTED: DNA-directed         | 291241363 | XP_00274058 | 1.54     | 1.55    | 1.63     | 0.5     | 0.95     | 0        | 1.43     | 1        | 0.61     | 0      | 0       | 0       |
| 1-2.c40213/1/1738  | Phytanoyl-CoA hydroxylase-      | 678148140 | KFV17291.1  | 0.69     | 4       | 1.01     | 1.49    | 1.06     | 6.56     | 1.09     | 1.24     | 1.55     | 21.92  | 54.13   | 39.61   |
| 1-2.c35594/1/9297  | PREDICTED: myosin bindin        | 847128061 | XP_01281857 | 48.57    | 29.47   | 0        | 93.81   | 154.24   | 204.73   | 306.69   | 220.07   | 259.38   | 69.77  | 43.74   | 19.14   |
| 1-2.c34119/1/1516  | unnamed protein product [On     | 642019941 | CDQ95350.1  | 12.16    | 19.58   | 0.92     | 39.53   | 31.97    | 29.58    | 106.2    | 78.11    | 59.63    | 24.16  | 3.5     | 12.87   |
| 1-2.c30374/1/1204  | PREDICTED: probable E3 ul       | 847147395 | XP_01282233 | 0        | 0       | 0        | 0       | 0        | 2.13     | 0        | 0        | 0        | 19.59  | 24.15   | 3.89    |

|                   |                                 |           |             |         |         |         |         |         |         |         |         |         |        |        |        |
|-------------------|---------------------------------|-----------|-------------|---------|---------|---------|---------|---------|---------|---------|---------|---------|--------|--------|--------|
| 2-3.c30410/1/6158 | PREDICTED: myosin-4 [Xer        | 847156920 | XP_01282446 | 18.99   | 4.38    | 608.76  | 428.14  | 200.75  | 2.78    | 811.68  | 251.43  | 323.14  | 13.67  | 15.17  | 12.6   |
| 2-3.c61486/3/2434 | periostin precursor [Xenopus    | 163915007 | NP_00110637 | 11.96   | 0       | 16.68   | 12.97   | 13.49   | 0       | 9.91    | 9.32    | 7.25    | 1.65   | 0      | 1.22   |
| 2-3.c25467/2/2494 | --                              | --        | --          | 1.43    | 0.11    | 5.06    | 1.89    | 1.32    | 7.72    | 4.33    | 4.25    | 3.08    | 0.35   | 0.12   | 0.24   |
| 1-2.c29603/1/1517 | troponin T [Hyla chryso         | 69219560  | AAZ04163.1  | 1184.56 | 155.77  | 2502.06 | 2198.22 | 1677.28 | 119.94  | 2669.35 | 2302.93 | 1995.19 | 420.4  | 300    | 553.63 |
| 1-2.c4923/1/1137  | tropomyosin alpha, partial [H   | 69219511  | AAZ04161.1  | 111.27  | 11.23   | 251.79  | 208.96  | 167.27  | 30.26   | 108.37  | 175.79  | 139.61  | 34.78  | 30.56  | 15.07  |
| 1-2.c24376/3/1290 | tyrosine 3-monooxygenase/tr     | 89515082  | ABD75373.1  | 42.51   | 66.77   | 24.47   | 66.42   | 0       | 0       | 65.2    | 18.45   | 48.65   | 0      | 0      | 11.18  |
| 2-3.c58783/1/2350 | --                              | --        | --          | 0.21    | 3.68    | 0.34    | 50.86   | 0       | 0.1     | 0.34    | 100.07  | 95.65   | 0      | 0.08   | 0      |
| 3-6.e17965/1/3534 | PREDICTED: myosin-4 [Xer        | 847156920 | XP_01282446 | 2.95    | 0       | 5.99    | 5.11    | 4.13    | 0.05    | 4.51    | 6.08    | 4.85    | 0.32   | 1.02   | 0.53   |
| 1-2.c34265/1/5396 | larval type I keratin [Rana cat | 134140868 | ABO61147.1  | 1941.06 | 462.95  | 1476.77 | 1202.38 | 772.7   | 216.62  | 1301.2  | 1671.4  | 1444.84 | 252.9  | 383.68 | 240.83 |
| 3-6.c15288/3/6232 | PREDICTED: myosin-4 [Xer        | 847156920 | XP_01282446 | 2.07    | 0       | 12.67   | 10.39   | 8       | 0       | 9.62    | 6.84    | 7.64    | 1.69   | 0.18   | 0.29   |
| 2-3.c35770/1/2386 | PREDICTED: collagen alpha       | 591360726 | XP_00705528 | 0.01    | 36.14   | 9.07    | 5.12    | 4.03    | 23.67   | 5.67    | 4.38    | 5.26    | 1.28   | 0      | 0      |
| 1-2.c50267/3/1430 | PREDICTED: sarcalumenin i       | 512868459 | XP_00491808 | 5.43    | 3.4     | 7.65    | 8.36    | 1.71    | 2.22    | 7.34    | 7.91    | 5.24    | 1.29   | 0      | 0      |
| 1-2.c25674/1/1296 | PREDICTED: glypican-5-lik       | 301607624 | XP_00293342 | 0       | 33.51   | 0       | 0       | 0       | 14.31   | 3.26    | 0.28    | 0       | 34.3   | 47.08  | 22.75  |
| 2-3.c41073/1/2023 | PREDICTED: ubiquitin carb       | 847100581 | XP_01281262 | 1.53    | 0       | 0       | 0.65    | 1.92    | 0       | 2.84    | 1.57    | 1.46    | 0      | 0      | 0      |
| 1-2.c20368/1/1284 | --                              | --        | --          | 0.22    | 0       | 0       | 0       | 0       | 13.35   | 0.18    | 0.32    | 0       | 171.89 | 257.6  | 36.11  |
| 2-3.c61166/1/2522 | PREDICTED: nuclear recept       | 847100804 | XP_01281265 | 2.38    | 10.43   | 0.71    | 1.09    | 2.56    | 2.16    | 2.36    | 5.17    | 6.69    | 0      | 1.45   | 0.01   |
| 1-2.c34000/1/5930 | PREDICTED: sarcalumenin i       | 847166841 | XP_01282670 | 61.89   | 0       | 34.47   | 17.69   | 84.17   | 0       | 92.9    | 96.32   | 69.99   | 17.97  | 17.18  | 13.99  |
| 2-3.c29850/1/2612 | --                              | --        | --          | 0       | 0       | 4.57    | 1.56    | 0       | 0       | 8.7     | 3.87    | 8.15    | 0      | 0      | 0      |
| 1-2.c13847/1/1263 | uncharacterized protein LOC     | 187608167 | NP_00112012 | 17.32   | 1.7     | 18.21   | 17.78   | 18.18   | 2.61    | 14.45   | 18.68   | 22.04   | 2.03   | 3.19   | 1.44   |
| 3-6.e10833/1/3027 | PREDICTED: collagen alpha       | 591360726 | XP_00705528 | 0.38    | 8.78    | 2.96    | 1.08    | 0.58    | 9.12    | 1.4     | 2.2     | 1.71    | 0.17   | 0      | 0      |
| 3-6.e18811/1/2977 | myosin, heavy chain 4, skelet   | 47575800  | NP_00100124 | 0.52    | 0       | 1.89    | 0.65    | 0.18    | 0       | 2.34    | 1.64    | 1.15    | 0      | 0.12   | 0      |
| 2-3.c42079/1/2305 | PREDICTED: tyrosine-protei      | 847094360 | XP_01281088 | 1.45    | 11.69   | 0.47    | 0       | 0.26    | 2.24    | 0.33    | 0.32    | 0       | 9.79   | 9.72   | 12.86  |
| 1-2.c6800/1/1622  | nuclear export mediator facto   | 537152771 | ERE72278.1  | 0.86    | 2.94    | 0.81    | 0.81    | 1.29    | 0.92    | 0       | 0       | 2.42    | 6.21   | 7.84   | 0      |
| 1-2.c35872/1/1500 | --                              | --        | --          | 0.6     | 6.43    | 0.61    | 75.29   | 0.9     | 0       | 0       | 157.57  | 143.33  | 0      | 0      | 0      |
| 1-2.c19159/1/1431 | PREDICTED: large neutral a      | 532055639 | XP_00537053 | 52.1    | 0       | 24.6    | 75.8    | 91.95   | 0       | 47.21   | 35.05   | 44.51   | 0      | 0      | 17.83  |
| 1-2.c6516/1/1608  | --                              | --        | --          | 0.89    | 64.35   | 1.44    | 1.35    | 0.95    | 24.75   | 1.68    | 1.08    | 1.86    | 33.81  | 40.04  | 43.47  |
| 2-3.c32705/1/2033 | PREDICTED: myosin-4 [Xer        | 847156920 | XP_01282446 | 0.96    | 0       | 7.3     | 5.21    | 3.57    | 0       | 5.92    | 2.79    | 3.37    | 0.44   | 0      | 0.13   |
| 1-2.c31601/6/1344 | PREDICTED: NAD(P) transl        | 706104795 | XP_01019845 | 10.89   | 9.91    | 10.32   | 13.6    | 3.87    | 0.29    | 17.23   | 7.74    | 5.79    | 1.84   | 0      | 0      |
| 1-2.c43348/1/1359 | PREDICTED: nuclear recept       | 847100804 | XP_01281265 | 35.13   | 177.77  | 39.42   | 17.14   | 110.55  | 19.69   | 21.57   | 28.02   | 51.39   | 6.69   | 3.51   | 4.27   |
| 2-3.c20492/1/2499 | PREDICTED: general vesicu       | 512815393 | XP_00491113 | 0       | 0       | 0       | 0       | 0       | 1.63    | 1.53    | 1.86    | 0.94    | 0      | 0      | 0      |
| 2-3.c26550/1/4673 | --                              | --        | --          | 11.13   | 12.99   | 19.13   | 11.19   | 13.12   | 1.97    | 20.24   | 6.25    | 11.72   | 1.91   | 0.15   | 1.51   |
| 3-6.e3337/6/3018  | protein unc-45 homolog B [X     | 297591951 | NP_00117205 | 2.73    | 10.39   | 1.14    | 0.15    | 1.17    | 30.67   | 2.03    | 0.37    | 1.32    | 0      | 0      | 0      |
| 1-2.c6890/1/1639  | PREDICTED: dnaI homolog         | 847134514 | XP_01281987 | 1.92    | 0       | 2.17    | 3.17    | 2.91    | 0       | 0       | 0       | 0       | 12.81  | 17.34  | 2.6    |
| 2-3.c27188/1/2344 | PREDICTED: target of Nesh       | 847100396 | XP_01281255 | 0       | 14.98   | 4.72    | 0.63    | 1.9     | 18.14   | 1.13    | 1.52    | 2.08    | 0      | 0      | 0      |
| 1-2.c35872/1/1500 | --                              | --        | --          | 0.51    | 3.1     | 0.26    | 79.08   | 0.22    | 0       | 0.66    | 131.75  | 129.01  | 0      | 0      | 0      |
| 3-6.e9671/2/3157  | RecName: Full=Aquaporin F.      | 1703359   | P50501.1    | 5.93    | 12.67   | 4.04    | 5.48    | 11.41   | 22.39   | 0.36    | 0.59    | 3.48    | 35.77  | 14.63  | 34.64  |
| 1-2.c35227/1/8313 | RecName: Full=Actin, alpha      | 113288    | P10994.1    | 0       | 0       | 0       | 35.65   | 0       | 0       | 0       | 0       | 0       | 109.09 | 18.75  | 62.51  |
| 2-3.c59770/1/2338 | PREDICTED: phosphorylase        | 847163876 | XP_01282595 | 0       | 0.88    | 2.53    | 2.23    | 1.22    | 3.04    | 0       | 0       | 0.44    | 13.87  | 18.88  | 8.56   |
| 2-3.c60695/1/2472 | PREDICTED: mitochondrial        | 326666498 | XP_00266141 | 3.06    | 10.59   | 2.03    | 1.83    | 1.97    | 10.3    | 3.31    | 3.5     | 7.62    | 0.33   | 0      | 0.56   |
| 3-6.c8576/1/3834  | PREDICTED: myosin-4 [Xer        | 847156920 | XP_01282446 | 1.19    | 0       | 2.4     | 2.14    | 1.85    | 0       | 3.11    | 2.74    | 1.95    | 0.21   | 0.2    | 0.24   |
| 1-2.c23378/1/1329 | PREDICTED: mitochondrial        | 301626778 | XP_00294256 | 42.23   | 1.96    | 22      | 33.3    | 50.02   | 1.84    | 87.88   | 36.86   | 45.46   | 2.5    | 9.31   | 15.07  |
| 2-3.c45849/1/2087 | --                              | --        | --          | 36.67   | 10.82   | 29.98   | 21.14   | 20.09   | 4.46    | 19.74   | 31.12   | 30.17   | 4.56   | 3.51   | 6.34   |
| 3-6.c7451/1/2842  | RecName: Full=Collagen alp      | 18202034  | O42350.1    | 39.08   | 1297.31 | 200.62  | 131.64  | 129.35  | 561.17  | 53.28   | 57.55   | 120     | 11.87  | 8.91   | 11.38  |
| 1-2.c41428/1/1311 | --                              | --        | --          | 0       | 0       | 0       | 0.84    | 0       | 0       | 0       | 0       | 0       | 9.3    | 4.11   | 6.46   |
| 2-3.c63592/1/2016 | alpha 1 type I collagen [Rana   | 3242649   | BAA29028.1  | 158.82  | 4023.54 | 525.27  | 297.81  | 297.79  | 3160.37 | 396.06  | 236.51  | 483.38  | 120.1  | 44.86  | 65.1   |
| 3-6.c5318/1/3951  | PREDICTED: endogenous re        | 831566752 | XP_01273347 | 0       | 0       | 0.66    | 0       | 0.36    | 1.68    | 2.57    | 1.4     | 1.18    | 0      | 0      | 0      |
| 1-2.c43062/1/1671 | Htra1 protein [Xenopus laevi    | 56270034  | AAH87471.1  | 1.04    | 0       | 0.9     | 2.35    | 3.27    | 7.15    | 2.59    | 0.25    | 0.77    | 42.67  | 40.94  | 20.82  |
| 2-3.c37366/1/2450 | hypothetical protein LOTGIE     | 676430378 | XP_00904590 | 2.13    | 0.51    | 0       | 1.46    | 0       | 0.27    | 0       | 0       | 0       | 1.46   | 4.12   | 3.61   |
| 3-6.c3238/2/2848  | kelch-like protein 30 [Xenop    | 156717430 | NP_00109625 | 8.75    | 15.34   | 8.94    | 5.03    | 7.65    | 42.11   | 5.26    | 5.83    | 5.39    | 0.37   | 0.99   | 0.67   |
| 3-6.e16484/1/4818 | PREDICTED: transmembran         | 847095050 | XP_01281107 | 4.04    | 2.7     | 1.77    | 0.19    | 1.99    | 2.1     | 2.55    | 3.77    | 4.59    | 0      | 0      | 0.54   |
| 1-2.c49046/1/1592 | --                              | --        | --          | 1.98    | 22.7    | 2.06    | 2.51    | 2.22    | 15.68   | 4.88    | 2.76    | 2.6     | 96.56  | 77.74  | 67.24  |
| 3-6.e18821/1/2932 | PREDICTED: myosin-4 [Xer        | 847156920 | XP_01282446 | 1.86    | 0       | 4.81    | 3       | 2.85    | 0.04    | 4.49    | 3.84    | 3.09    | 0.44   | 0.26   | 0.33   |
| 1-2.e19370/1/6020 | PREDICTED: nuclease-sensi       | 532064616 | XP_00531817 | 0       | 0       | 0       | 50.55   | 0       | 0       | 0       | 154.67  | 157.98  | 0      | 0      | 0      |
| 1-2.e17348/3/1795 | PREDICTED: asparagine--tr       | 512809930 | XP_00293448 | 18.99   | 0.77    | 0.09    | 0.22    | 4.51    | 22.53   | 0.36    | 0.15    | 0.18    | 15.26  | 35.97  | 14.99  |
| 1-2.e1947/1/1359  | calsequestrin-2 precursor [Xe   | 45360999  | NP_989136.1 | 218.79  | 59.46   | 8.03    | 214.68  | 268.29  | 46.09   | 230.92  | 439.71  | 294.23  | 27.91  | 51.06  | 84.85  |
| 2-3.c33303/2/2304 | ryanodine receptor beta isofo   | 29501272  | BAA04647.2  | 3.12    | 3.31    | 21.12   | 10.17   | 12.55   | 14.99   | 18      | 15.5    | 21.8    | 6.68   | 0.61   | 2.27   |
| 3-6.e5570/1/3274  | --                              | --        | --          | 9.54    | 0.49    | 7.44    | 15.82   | 15.99   | 1.11    | 4.39    | 5.93    | 10.65   | 1.66   | 0.64   | 0.8    |
| 3-6.e16332/1/3513 | myosin, heavy chain 2, skelet   | 55742222  | NP_00100680 | 31.49   | 5.09    | 15      | 6.94    | 18.52   | 0       | 8.48    | 7.15    | 15.56   | 1.07   | 0.65   | 0.59   |

|                    |                                 |           |             |         |         |         |         |         |         |         |         |         |         |        |        |
|--------------------|---------------------------------|-----------|-------------|---------|---------|---------|---------|---------|---------|---------|---------|---------|---------|--------|--------|
| 1-2.c1161/47/1713  | phosphoglycerate kinase 1 [X    | 62858027  | NP_00101654 | 661.22  | 64.4    | 659.36  | 999.62  | 716.43  | 195.89  | 582.27  | 614.93  | 833.03  | 163.41  | 82.15  | 187.49 |
| 2-3.c393/429/2195  | transketolase-like protein 1 [J | 45361299  | NP_989227.1 | 60.71   | 544.77  | 51      | 26.02   | 50.26   | 169.91  | 32.76   | 39.15   | 42.19   | 6.81    | 4.9    | 10.36  |
| 2-3.c51503/2/2736  | periostin precursor [Xenopus    | 163915007 | NP_00110637 | 3.44    | 0       | 47.18   | 15.01   | 22.68   | 2.63    | 22.37   | 7.48    | 10.2    | 0       | 0      | 2.62   |
| 1-2.c37398/1/1661  | PREDICTED: 6-phosphofru         | 594036326 | XP_00604282 | 0       | 0       | 0       | 3.74    | 0.48    | 0       | 4.08    | 0.61    | 2.4     | 0       | 0      | 0      |
| 2-3.e10563/1/1916  | Unknown (protein for IMAG       | 197246230 | AAI68800.1  | 216.81  | 8.24    | 146.72  | 384.39  | 200.97  | 45.78   | 181.57  | 174.77  | 273.35  | 59.55   | 24.19  | 50.03  |
| 1-2.c41161/1/4386  | keratin, type I cytoskeletal 47 | 147899009 | NP_00108243 | 3136.78 | 562.95  | 2082.86 | 2317.74 | 1657.67 | 536.14  | 2263.64 | 2585.54 | 2809.59 | 484.52  | 820.68 | 369.94 |
| 2-3.c21738/1/2493  | PREDICTED: myosin-bindin        | 556961300 | XP_00599095 | 2.76    | 10.91   | 4.7     | 3.34    | 2.18    | 259.5   | 2.2     | 6.09    | 5.48    | 0.04    | 0.32   | 0.72   |
| 1-2.c6102/2/1412   | homogentisate 1,2-dioxygena     | 148230238 | NP_00108750 | 6.18    | 3.5     | 1.82    | 3.5     | 0       | 3.2     | 5.59    | 4.67    | 8.48    | 0.44    | 0.09   | 0.53   |
| 1-2.c34161/1/1654  | --                              | --        | --          | 0       | 13.59   | 0       | 10.43   | 0       | 5.03    | 0       | 0       | 0       | 76.32   | 2.44   | 51.86  |
| 3-6.c18716/1/2695  | myosin, heavy chain 4, skelet   | 47575800  | NP_00100124 | 1.6     | 0.02    | 6.87    | 3.95    | 4.68    | 0       | 3.49    | 6.35    | 3.53    | 0.5     | 0.44   | 0.53   |
| 3-6.e10359/1/3816  | hexokinase 1 [Xenopus laevis    | 160420247 | NP_00109665 | 1.85    | 0       | 1.89    | 0.07    | 3.83    | 3.88    | 5.9     | 4.87    | 8.34    | 0       | 3.54   | 0      |
| 2-3.c53852/1/2381  | PREDICTED: dual specificit      | 847088131 | XP_01281955 | 0.85    | 1.53    | 0.77    | 0       | 1.01    | 2.92    | 3.58    | 1.1     | 1       | 0       | 0      | 0      |
| 1-2.c16775/1/1866  | serine protease HTRA1 precu     | 350276150 | NP_00108875 | 5.28    | 155.73  | 2.82    | 3.92    | 4.23    | 48.94   | 2.47    | 7.27    | 5.07    | 78.98   | 80.24  | 124.98 |
| 1-2.e15912/30/1420 | --                              | --        | --          | 2.55    | 5.13    | 5.69    | 3.68    | 8.89    | 28.43   | 5.67    | 4.7     | 11.51   | 0.59    | 1.15   | 0.15   |
| 2-3.c47911/1/2529  | regulator of cell cycle RGCC    | 156717456 | NP_00109626 | 543.81  | 60.5    | 439.04  | 653.34  | 790.14  | 31.89   | 995.01  | 494.08  | 366.81  | 64.41   | 153.7  | 58.87  |
| 2-3.c52177/1/6339  | PREDICTED: myosin-4 [Xer        | 847156920 | XP_01282446 | 5.19    | 0.78    | 43.02   | 42.75   | 18.43   | 0       | 48.12   | 17.97   | 26.35   | 6.75    | 0      | 2.01   |
| 2-3.e10462/1/2112  | --                              | --        | --          | 338.55  | 8.58    | 84.73   | 103.72  | 242.32  | 4.23    | 215     | 305.34  | 211.99  | 48.19   | 20.94  | 68.91  |
| 1-2.c32802/1/4797  | PREDICTED: actin, alpha ca      | 874446319 | XP_01295408 | 620.52  | 206.42  | 1524.5  | 1415.16 | 718.82  | 1424.04 | 2566.03 | 2510.56 | 1097.33 | 307.25  | 406.62 | 397.15 |
| 2-3.l1688/3/2609   | --                              | --        | --          | 16.48   | 0.15    | 10.61   | 25.73   | 15.42   | 1.83    | 11.54   | 10.53   | 13.82   | 3.21    | 1.4    | 1.57   |
| 2-3.c25244/2/2645  | myosin, heavy chain 4, skelet   | 47575800  | NP_00100124 | 456.07  | 21.74   | 1557.31 | 902.72  | 1226.32 | 11.89   | 877.27  | 1635.47 | 977.16  | 172.38  | 110.85 | 246.84 |
| 2-3.c13378/2/1998  | PREDICTED: segment polari       | 847126719 | XP_01281815 | 0       | 1.63    | 0       | 0       | 0       | 2.77    | 0       | 0       | 5.99    | 1.79    | 3.14   | 0      |
| 2-3.c28216/1/1972  | PREDICTED: collagen alpha       | 701292594 | XP_01002215 | 12.39   | 115.65  | 29.88   | 26.52   | 15.39   | 109.99  | 11.26   | 13.9    | 28.31   | 0.75    | 0.02   | 4.4    |
| 3-6.c2685/8/3619   | PREDICTED: myosin-4 [Xer        | 847156920 | XP_01282446 | 52.01   | 1.51    | 21.99   | 57.22   | 27.37   | 0.34    | 34.46   | 52.51   | 27      | 6.77    | 4      | 9.12   |
| 2-3.c34127/1/2521  | PREDICTED: nebulin-like is      | 557018863 | XP_00600980 | 14.96   | 3.93    | 14.01   | 5.8     | 1.57    | 2.8     | 21.59   | 13.04   | 11.48   | 0.62    | 5.08   | 2.98   |
| 1-2.c24401/1/1580  | pre-mRNA cleavage complex       | 194018660 | NP_00112341 | 4.76    | 14.69   | 3.84    | 2.26    | 1.72    | 5.99    | 0       | 0.6     | 0       | 7.6     | 14.06  | 12.52  |
| 2-3.c43869/1/2241  | --                              | --        | --          | 2.32    | 12.73   | 9.29    | 1.66    | 3.26    | 17.02   | 1.13    | 2.76    | 3.53    | 0.06    | 0      | 0.09   |
| 1-2.c23600/1/1565  | --                              | --        | --          | 3.94    | 66.03   | 1.52    | 5.97    | 2.11    | 10.16   | 2.56    | 1.62    | 2.42    | 41.82   | 63.11  | 34.29  |
| 2-3.c10627/10/2082 | lysyl-tRNA synthetase [Xeno     | 147898923 | NP_00108005 | 30.61   | 22.69   | 11.6    | 6.1     | 6.9     | 7.27    | 28.34   | 14.81   | 23.14   | 6.26    | 3.02   | 3.09   |
| 1-2.e13992/6/1370  | unnamed protein product [On     | 642126608 | CDQ60726.1  | 23.36   | 5.34    | 36.61   | 31.16   | 21.3    | 4.77    | 18.36   | 26.8    | 25.15   | 0.74    | 1.11   | 8.93   |
| 1-2.c2352/9/1630   | PREDICTED: cytochrome P-        | 602675207 | XP_00744308 | 0       | 0.54    | 0.07    | 0       | 0       | 3.17    | 0.09    | 0       | 0.64    | 22.78   | 14.88  | 10.72  |
| 1-2.c5402/1/1526   | alpha 1 type II collagen [Cync  | 5360532   | BAA82043.1  | 10.05   | 235.7   | 79.06   | 31.17   | 9.28    | 86.69   | 27.22   | 23.57   | 24.78   | 5.31    | 0.85   | 6.69   |
| 3-6.e7024/2/3169   | alpha 1 type I collagen [Rana   | 3242649   | BAA29028.1  | 2.93    | 84.8    | 10.83   | 9.21    | 7.04    | 72.86   | 10.97   | 7.07    | 16.93   | 2.76    | 0.91   | 2.45   |
| 1-2.c26203/2/1584  | PREDICTED: nucleolar GTP        | 512849296 | XP_00293522 | 17.84   | 30.54   | 0       | 24.04   | 0       | 1.93    | 26.46   | 17.75   | 17.03   | 4.05    | 6.26   | 1.17   |
| 1-2.c40189/1/1472  | PREDICTED: collagen alpha       | 194224629 | XP_00191505 | 7.6     | 12.11   | 23.29   | 8.58    | 3.54    | 6.64    | 12.53   | 9.25    | 16.99   | 3.13    | 1.07   | 1.21   |
| 2-3.c55586/1/2472  | --                              | --        | --          | 109.39  | 4.5     | 24.85   | 32.08   | 75.51   | 0.65    | 62.7    | 93.43   | 63.69   | 17.56   | 10.03  | 21.82  |
| 2-3.c9965/4/2240   | PREDICTED: serine-rich coi      | 847147000 | XP_01282228 | 14.41   | 0.85    | 5.44    | 7.39    | 11.56   | 0       | 12.78   | 6.23    | 5.87    | 1.48    | 0.26   | 1.56   |
| 1-2.c50878/2/1422  | tyrosine 3-monooxygenase/tr     | 89515082  | ABD75373.1  | 0       | 0       | 34.98   | 0       | 4.92    | 0       | 0       | 0       | 0       | 83.65   | 0      | 138.15 |
| 3-6.e7488/1/3425   | myosin heavy chain, partial [l  | 4249701   | AAD13772.1  | 0.05    | 0.05    | 2.76    | 1.76    | 1.15    | 0       | 4.84    | 1.92    | 1.14    | 0.12    | 0      | 0      |
| 1-2.c41161/1/4386  | larval type I keratin [Rana cat | 134140868 | ABO61147.1  | 1716.14 | 452.29  | 990.88  | 788.12  | 474.86  | 41.92   | 866.49  | 767.21  | 566.21  | 161.09  | 151.52 | 203.16 |
| 3-6.c8993/1/2680   | PREDICTED: nexilin isoform      | 512837277 | XP_00491397 | 35.01   | 75.35   | 40.04   | 22.34   | 35.26   | 175.21  | 19.94   | 27.74   | 37.57   | 2.09    | 11.03  | 6      |
| 2-3.c22138/1/2331  | --                              | --        | --          | 36.27   | 10.18   | 49.03   | 44.73   | 37.7    | 6.08    | 57.5    | 29.5    | 46.23   | 14.9    | 3.48   | 5.77   |
| 1-2.c4233/4/1280   | tetraspanin-2 [Xenopus (Silur   | 163915095 | NP_00110653 | 31.54   | 134.42  | 74.83   | 27.74   | 71.71   | 340.13  | 33.74   | 46.29   | 43.19   | 11.78   | 6.09   | 6.97   |
| 3-6.c3497/3/2851   | matrilin-2 precursor [Xenopu    | 45361321  | NP_989238.1 | 11.56   | 12.65   | 4.69    | 4.74    | 2.45    | 14.99   | 4.22    | 8.21    | 6.09    | 0       | 0.47   | 2.02   |
| 2-3.c59107/1/2602  | --                              | --        | --          | 8.08    | 9.75    | 7.21    | 2.77    | 3.11    | 7.9     | 28.09   | 4.45    | 15.44   | 0.37    | 0.22   | 0      |
| 2-3.c33887/1/1925  | PREDICTED: ATP-binding c        | 847161447 | XP_01282525 | 0.15    | 1.03    | 0       | 0.48    | 0       | 0       | 0       | 0       | 0       | 4.5     | 2.12   | 4.43   |
| 2-3.c36298/1/2238  | PREDICTED: ankryrin repeat      | 512839176 | XP_00293505 | 9.21    | 0.06    | 4.53    | 4.08    | 3.98    | 0.75    | 9.15    | 7.94    | 20.36   | 0       | 3.45   | 0.5    |
| 3-6.e17414/1/2742  | PREDICTED: myosin-4 [Xer        | 847156920 | XP_01282446 | 0       | 0       | 2.31    | 0.96    | 0.67    | 0       | 1.83    | 0.89    | 0.78    | 0       | 0      | 0      |
| 3-6.e16042/1/3035  | PREDICTED: myosin-4 [Xer        | 847156920 | XP_01282446 | 1.33    | 0       | 3.16    | 2.74    | 2.91    | 0       | 4.67    | 2.26    | 1.85    | 0.23    | 0      | 0      |
| 2-3.c20452/1/2029  | PREDICTED: triosephosphat       | 558167186 | XP_00612420 | 3009.12 | 438     | 3851.57 | 3503.49 | 3060.06 | 684.46  | 3752.26 | 3100.59 | 4640.99 | 1130.73 | 890.18 | 729.04 |
| 2-3.c46431/1/2168  | PREDICTED: serine--tRNA         | 301622150 | XP_00294040 | 0       | 2.44    | 0.59    | 2.96    | 0       | 2.27    | 1.03    | 1.25    | 0       | 0       | 0      | 0      |
| 2-3.c50941/2/2381  | --                              | --        | --          | 0.59    | 0       | 2.61    | 0.85    | 3.14    | 14.59   | 1.28    | 2.23    | 2.21    | 0       | 0      | 0      |
| 1-2.c52410/1/1354  | collagen, type 1, alpha 2 prec  | 147898763 | NP_00108072 | 192.9   | 2278.91 | 535     | 338.81  | 303.56  | 3225.02 | 306.77  | 249.59  | 457.38  | 109.55  | 43.36  | 81.54  |
| 3-6.e18258/1/2976  | PREDICTED: caveolin-2-lik       | 301611463 | XP_00293525 | 6.17    | 6.37    | 0.12    | 3.69    | 0       | 4.1     | 1.23    | 3.57    | 2.58    | 0.25    | 0.25   | 0.01   |
| 2-3.c54531/1/1984  | --                              | --        | --          | 11.92   | 3.59    | 53.86   | 22.33   | 5.69    | 0.15    | 12.06   | 33.37   | 24.56   | 2.38    | 0.26   | 2.8    |
| 3-6.c16873/1/3147  | myosin, heavy chain 4, skelet   | 47575800  | NP_00100124 | 0.58    | 0       | 2.7     | 2.17    | 1.47    | 0.09    | 2.61    | 1.5     | 1.98    | 0       | 0.15   | 0.18   |
| 2-3.c5210/3/2110   | --                              | --        | --          | 8.128   | 62.05   | 20.28   | 17.03   | 20.85   | 94.22   | 19.52   | 16.72   | 20.58   | 3.78    | 0.26   | 6.19   |
| 2-3.c59218/1/2521  | Brg1 [Xenopus laevis]           | 56474875  | AAV91782.1  | 1.97    | 15.92   | 1.99    | 1.96    | 0       | 0.31    | 0       | 0.08    | 0.73    | 7.99    | 6.88   | 11.39  |
| 1-2.c36994/4/1771  | Basic leucine zipper and W2     | 677309152 | KFP91580.1  | 44.1    | 1.38    | 26.28   | 10.55   | 22.31   | 4.84    | 11.97   | 17.4    | 11.58   | 0       | 5.41   | 2.06   |



|                    |                                 |           |             |          |         |          |          |          |          |         |          |          |         |         |         |
|--------------------|---------------------------------|-----------|-------------|----------|---------|----------|----------|----------|----------|---------|----------|----------|---------|---------|---------|
| 1-2.c30442/1/1583  | --                              | --        | 37.25       | 6.42     | 22.24   | 21.57    | 24.9     | 2.35     | 56.65    | 28.16   | 26.69    | 7.14     | 9.71    | 6.03    |         |
| 2-3.c30410/1/6158  | PREDICTED: myosin-4 [Xer        | 847156920 | XP_01282446 | 2.0      | 0.5     | 7.45     | 5.21     | 1.19     | 0.07     | 5.96    | 0.97     | 4.24     | 0.16    | 0       | 0.14    |
| 1-2.c28349/1/1495  | TRH4 protein [Xenopus laevi     | 148226933 | NP_00108390 | 0        | 0       | 0        | 5.98     | 0        | 0        | 0.87    | 0.55     | 2.64     | 29.45   | 43.33   | 20.19   |
| 1-2.c40465/1/3661  | actin, alpha skeletal muscle B  | 820145793 | KKX13565.1  | 4.88     | 17.99   | 2.37     | 9.16     | 14.93    | 50.36    | 7.08    | 4.29     | 19.43    | 171.9   | 89.57   | 219.2   |
| 1-2.e11974/3/1520  | PREDICTED: ornithine amin       | 768381361 | XP_01158831 | 25.41    | 10.87   | 16.3     | 18.08    | 3.52     | 9.42     | 28.36   | 18       | 22.19    | 7.09    | 5.6     | 0.79    |
| 2-3.e27287/1/2364  | hypothetical protein CAPTEI     | 443682880 | ELT87315.1  | 1.75     | 47.73   | 2.77     | 2.82     | 1.69     | 6.99     | 3.29    | 0        | 4.56     | 44.78   | 62.99   | 28.38   |
| 1-2.c71054/1/1683  | transketolase-like protein 1 [? | 45361299  | NP_989227.1 | 0        | 0       | 0        | 10.34    | 0        | 18.16    | 7.26    | 6.61     | 9.19     | 0       | 3.26    | 0       |
| 2-3.c55918/1/2505  | myosin, heavy chain 2, skelet   | 55742222  | NP_00100680 | 1.52     | 0.16    | 3.39     | 1.11     | 2.63     | 0        | 1.82    | 3.55     | 1.44     | 0       | 0       | 0.24    |
| 2-3.c45694/1/2236  | unnamed protein product [On     | 642130802 | CDQ57637.1  | 1.52     | 12.15   | 0.82     | 1.73     | 1.18     | 4.63     | 0.29    | 1.41     | 1.17     | 20.79   | 21.22   | 23.08   |
| 3-6.c16047/1/3033  | PREDICTED: collagen alpha       | 847166756 | XP_01282667 | 8.63     | 73.36   | 18.34    | 8.57     | 12.6     | 53.53    | 5.24    | 10.54    | 7.17     | 1.79    | 0.75    | 1.57    |
| 1-2.e16133/380/150 | mitochondrial inorganic phos    | 22653426  | AAN04052.1  | 164.23   | 113.79  | 120.43   | 221.81   | 148.83   | 139.69   | 135.59  | 226.17   | 282.96   | 46.65   | 71.98   | 45.45   |
| 1-2.c40861/2/1438  | alpha 1 type I collagen [Rana   | 3242649   | BAA29028.1  | 5.82     | 147.08  | 18.13    | 10.22    | 10.59    | 117.08   | 12.51   | 8.98     | 21.74    | 2.87    | 0.71    | 2.77    |
| 1-2.c28747/1/1357  | --                              | --        | --          | 3.36     | 29.7    | 3.15     | 4.38     | 1.76     | 8.83     | 2.06    | 2.27     | 4.83     | 93.94   | 70.54   | 48.86   |
| 1-2.c35444/1/1643  | --                              | --        | --          | 11.42    | 5.05    | 11.14    | 8.36     | 7.45     | 5.16     | 17.2    | 8.61     | 10.12    | 1.44    | 3.31    | 1.32    |
| 1-2.e24923/1/1601  | probable threonine--tRNA lig    | 156717366 | NP_00109622 | 19.34    | 1.34    | 19.72    | 12.58    | 16.18    | 89.95    | 25.67   | 9.05     | 9.46     | 0.13    | 0       | 2.27    |
| 2-3.c24676/1/2629  | alpha 1 type I collagen [Rana   | 3242649   | BAA29028.1  | 210.91   | 5562.29 | 726.64   | 447.07   | 519.22   | 4587.38  | 413.12  | 284.85   | 604.26   | 154.48  | 61.12   | 103.29  |
| 2-3.c56150/1/2330  | ORF2 [Acanthocheilus spixii]    | 6576738   | BAA88337.1  | 2.47     | 21.7    | 2.97     | 2.77     | 2.49     | 4.04     | 0.8     | 0.22     | 0        | 21.03   | 26.15   | 11.33   |
| 3-6.c8248/1/2910   | methionine--tRNA ligase, cyt    | 283945504 | NP_00101700 | 3.44     | 26.42   | 4.67     | 2.99     | 5.07     | 55.26    | 13.72   | 6.4      | 4.11     | 0.71    | 0       | 0.95    |
| 3-6.c7840/2/3476   | PREDICTED: nebulin isoform      | 847166510 | XP_01282661 | 2.57     | 0.12    | 5.15     | 6.12     | 0        | 0        | 4.23    | 12.05    | 8.3      | 0       | 0       | 1.51    |
| 2-3.e10758/1/2030  | --                              | --        | --          | 0        | 0       | 0.8      | 1.12     | 0        | 0        | 1.67    | 1.5      | 1.12     | 0       | 0       | 0       |
| 2-3.c38690/2/2654  | collagen, type 1, alpha 2 prec  | 147898763 | NP_00108072 | 28.64    | 670.87  | 157.95   | 120.19   | 93.47    | 1038.32  | 97.85   | 42.27    | 99.88    | 21.34   | 7.44    | 26.03   |
| 3-6.c14577/2/3047  | eukaryotic translation initiat  | 148232020 | NP_00108075 | 1.9      | 0       | 19.43    | 1.31     | 0        | 0.54     | 0       | 0        | 0        | 18.2    | 18.5    | 0       |
| 1-2.e51845/2/1449  | --                              | --        | --          | 7.21     | 5.75    | 17.37    | 10.26    | 1.16     | 3.61     | 11.17   | 7.3      | 2.27     | 0       | 0       | 0.74    |
| 1-2.e11185/2/1325  | --                              | --        | --          | 268.79   | 8.49    | 145.51   | 426.23   | 250.39   | 147.1    | 307.75  | 326.81   | 335.33   | 133.53  | 43.72   | 66.5    |
| 3-6.c17958/3/2910  | PREDICTED: myosin-4-like        | 301611451 | XP_00293525 | 0.62     | 0.05    | 3.05     | 1.96     | 1.73     | 0        | 2.52    | 3.04     | 1.56     | 0.32    | 0.03    | 0.17    |
| 1-2.c43801/1/1761  | PREDICTED: fructose-bisph       | 530658308 | XP_00531468 | 158.74   | 4.55    | 125.18   | 158.21   | 174.43   | 7.79     | 124.64  | 124.78   | 193.81   | 33.38   | 28.89   | 44.98   |
| 1-2.e18977/1/1550  | --                              | --        | --          | 17.57    | 0.63    | 9.6      | 15.5     | 17.23    | 4.1      | 20.93   | 25.85    | 28.19    | 0       | 13.47   | 3.34    |
| 1-2.c5405/1/1572   | PREDICTED: paired amphip        | 847088488 | XP_01282055 | 2.02     | 0.33    | 0.23     | 5.33     | 0.8      | 1.26     | 0       | 0        | 0        | 5.31    | 4.53    | 3.92    |
| 1-2.c6549/3/1869   | myosin, heavy chain 4, skelet   | 47575800  | NP_00100124 | 921.16   | 45.88   | 3850.3   | 2374.4   | 3210.27  | 5.79     | 1508.02 | 1748.93  | 924.53   | 318.24  | 212.94  | 523.7   |
| 2-3.c47157/1/2706  | --                              | --        | --          | 0        | 123.83  | 2.19     | 10.17    | 0        | 7.93     | 0       | 0        | 9.73     | 88.42   | 111.45  | 50.87   |
| 3-6.c18644/4/3577  | PREDICTED: myosin-4 [Xer        | 847156920 | XP_01282446 | 0.52     | 0       | 7.68     | 1.83     | 2.47     | 0.12     | 2.66    | 1.02     | 3.14     | 0.24    | 0.22    | 0.13    |
| 1-2.c24322/1/1583  | PREDICTED: paraplegin [Xc       | 301608280 | XP_00293370 | 0        | 1.03    | 0        | 1.64     | 0.81     | 0        | 0.38    | 0        | 0        | 7.8     | 11.21   | 5.08    |
| 1-2.c38496/1/1234  | synaptophysin-like protein 2    | 54606873  | NP_00100611 | 65.33    | 16.16   | 58.06    | 85.53    | 60.7     | 208.84   | 126.37  | 89.43    | 115.64   | 31.42   | 22.36   | 25.22   |
| 2-3.c55609/1/2067  | PREDICTED: nebulin isoform      | 847166510 | XP_01282661 | 60.41    | 24.85   | 165.27   | 125.25   | 55.71    | 1.82     | 92.14   | 114.47   | 89.39    | 16.97   | 6.73    | 45.45   |
| 2-3.e21582/1/2184  | Keratin, type II cytoskeletal c | 677541627 | KFR03099.1  | 918.22   | 25.07   | 788.42   | 580.59   | 614.37   | 76.89    | 607.28  | 628.02   | 572      | 179.3   | 64.31   | 207.63  |
| 1-2.e17608/1/1986  | PREDICTED: actin, alpha ca      | 803091489 | XP_00401102 | 7.2      | 4.09    | 35.01    | 13.1     | 6.4      | 20.93    | 52.04   | 51.25    | 29.49    | 15.24   | 9.16    | 6.69    |
| 1-2.c52214/1/1542  | RecName: Full=Voltage-dep       | 46576355  | O57483.1    | 19.22    | 18.22   | 89.39    | 35.74    | 44.9     | 45.13    | 36      | 45.51    | 71.46    | 8.44    | 7.63    | 17.97   |
| 1-2.e28775/1/1440  | PREDICTED: sarcalumenin i       | 847166841 | XP_01282670 | 89.99    | 7.62    | 116.33   | 176.26   | 90.3     | 27.8     | 28.12   | 58.46    | 68.96    | 0       | 0       | 24.82   |
| 1-2.c39217/1/1601  | PREDICTED: ADP/ATP trar         | 829867054 | XP_01264035 | 16.03    | 2.44    | 17.92    | 20.44    | 21.27    | 10.49    | 29.2    | 18.85    | 24.44    | 6.23    | 9.52    | 0.64    |
| 1-2.c29435/1/1242  | --                              | --        | --          | 20.6     | 694.22  | 67.72    | 25.77    | 46.56    | 412.74   | 55.21   | 19.73    | 46.62    | 16.58   | 2.83    | 5.7     |
| 3-6.e11334/1/2761  | PREDICTED: obscurin isofo       | 847141066 | XP_01282115 | 20.97    | 14.44   | 24.53    | 16.64    | 16.68    | 26.12    | 44.21   | 40.2     | 71.42    | 22.98   | 8.31    | 7.66    |
| 1-2.c24693/1/702   | myosin essential light chain f  | 52699568  | AAU86906.1  | 11202.45 | 3553.47 | 20626.33 | 15488.03 | 19497.57 | 18092.79 | 21451.4 | 20247.19 | 18746.27 | 6268.58 | 5089.03 | 4527.12 |
| 2-3.c43665/1/2600  | dehydrogenase/reductase SDI     | 166158027 | NP_00110742 | 9.33     | 10.55   | 10.22    | 7.26     | 9.55     | 15.96    | 21.54   | 9.48     | 16.68    | 1.4     | 1.94    | 5.92    |
| 3-6.e11995/2/3177  | PREDICTED: ectonucleotide       | 847135215 | XP_01282011 | 0.23     | 4.77    | 0.76     | 0        | 0.76     | 1        | 0       | 0        | 0.32     | 6.3     | 1.7     | 5.76    |
| 2-3.e11756/5/2320  | PREDICTED: schwannomin          | 847126593 | XP_01281810 | 0.76     | 0.17    | 2.04     | 0.97     | 1.03     | 0        | 0.26    | 1.75     | 1.72     | 0       | 0       | 0       |
| 2-3.c9294/1/2336   | PREDICTED: eukaryotic trar      | 847089031 | XP_01282175 | 0.26     | 0       | 0        | 1.25     | 0        | 0        | 0       | 0        | 0        | 4.99    | 2.24    | 1.24    |
| 3-6.c3069/5/2948   | PREDICTED: myosin-4 [Xer        | 847156920 | XP_01282446 | 1.63     | 0       | 3.16     | 1.56     | 2.68     | 0        | 2.04    | 3.47     | 1.35     | 0       | 0.08    | 0.31    |
| 2-3.c61064/1/2551  | --                              | --        | --          | 21.14    | 0.53    | 5.05     | 4.01     | 11.6     | 0.99     | 9.62    | 6.87     | 12.4     | 0       | 4.13    | 1.57    |
| 2-3.c34950/2/2605  | dehydrogenase/reductase SDI     | 166158027 | NP_00110742 | 59.58    | 23.29   | 45.96    | 48.9     | 43.12    | 42.17    | 87.36   | 42.96    | 82.48    | 10.8    | 12.84   | 26.69   |
| 3-6.e14479/1/2867  | --                              | --        | --          | 1.93     | 23.04   | 16.74    | 4.3      | 4.89     | 105.17   | 1.02    | 2.09     | 6.07     | 0       | 0       | 0       |
| 3-6.c18237/1/2784  | PREDICTED: protein FAM1         | 512816747 | XP_00491125 | 17.67    | 0       | 14.31    | 6.2      | 12.9     | 2.66     | 8.07    | 5.99     | 13.67    | 0       | 2.91    | 2.37    |
| 1-2.c45531/1/1634  | --                              | --        | --          | 0        | 2.49    | 2.04     | 1.82     | 1.95     | 0        | 0       | 0        | 0        | 16.7    | 23.11   | 3.56    |
| 1-2.e18325/5/1432  | PREDICTED: WNT1-inducil         | 512845805 | XP_00293956 | 2.66     | 23.3    | 4.18     | 3.36     | 4.77     | 21.58    | 2.97    | 3.54     | 7.65     | 75.21   | 87.54   | 71.39   |
| 3-6.c13175/2/3112  | kinectin [Xenopus (Silurana)    | 194018594 | NP_00112338 | 9.31     | 0       | 8.33     | 0.02     | 10.63    | 4.56     | 10.72   | 9.47     | 9.02     | 2.43    | 4.39    | 0       |
| 1-2.c23459/2/1495  | hedghegog acyltransferase-like  | 147901798 | NP_00107945 | 102.02   | 36.59   | 280.04   | 135.68   | 124.14   | 104.84   | 204.28  | 264.03   | 266.88   | 98.83   | 55.64   | 42.37   |
| 2-3.c49774/1/2087  | PREDICTED: guanine deami        | 512813022 | XP_00491082 | 0.62     | 0       | 0.23     | 0.1      | 0.44     | 0.93     | 0.09    | 0        | 0.1      | 5.85    | 1.65    | 7.54    |
| 1-2.e12973/2/1297  | PREDICTED: AMP deamina          | 697003755 | XP_00956806 | 49.33    | 20.2    | 17.32    | 9.1      | 13.09    | 26.87    | 49.1    | 23.65    | 60.81    | 5.45    | 18.39   | 7.17    |
| 1-2.c24854/1/1866  | --                              | --        | --          | 49.8     | 29.78   | 74.32    | 46.93    | 47.24    | 4.96     | 84.21   | 26.36    | 49.52    | 13.68   | 2.68    | 9.52    |

|                    |                                 |           |              |          |         |          |          |          |        |          |          |          |         |         |         |
|--------------------|---------------------------------|-----------|--------------|----------|---------|----------|----------|----------|--------|----------|----------|----------|---------|---------|---------|
| 3-6.c3321/2/2731   | uncharacterized protein LOC     | 148232016 | NP_00109117  | 33.6     | 0.75    | 0.5      | 7.15     | 13.71    | 0.22   | 15.76    | 17.35    | 13.08    | 1.6     | 8.42    | 1.42    |
| 2-3.e9855/11/2246  | disks large-associated protein  | 213982915 | NP_001135662 | 1.42     | 1.69    | 1.35     | 0        | 0.44     | 4.37   | 1.38     | 1.57     | 1.05     | 0       | 0       | 0       |
| 2-3.e43334/1/8595  | PREDICTED: AMP deamina          | 847091857 | XP_01282625  | 22.2     | 0       | 26.99    | 5.87     | 15.4     | 7.64   | 17.92    | 10.38    | 17.44    | 0       | 2.18    | 1.22    |
| 2-3.e46968/1/2099  | --                              | --        | --           | 16.18    | 3.15    | 6.34     | 22.1     | 14.19    | 2.79   | 9.26     | 11.16    | 12.08    | 207.86  | 195.98  | 125.41  |
| 2-3.e19815/4/2170  | PREDICTED: nebulin isofon       | 847166512 | XP_01282661  | 83.01    | 40.89   | 284.93   | 64.06    | 0        | 0      | 143.98   | 90.11    | 216.42   | 32.14   | 31.55   | 48.99   |
| 2-3.e52988/1/2462  | --                              | --        | --           | 0        | 53.59   | 0.33     | 0.32     | 0.12     | 14.16  | 0.52     | 0.09     | 0.14     | 28.13   | 5.28    | 31.02   |
| 2-3.e12461/1/2048  | --                              | --        | --           | 39.05    | 190.15  | 29.76    | 33.66    | 20.84    | 100.15 | 32.99    | 26.47    | 47.13    | 524.68  | 444.66  | 521.28  |
| 2-3.e22138/1/2331  | --                              | --        | --           | 3.22     | 2.07    | 7.22     | 4.64     | 7.08     | 0.97   | 7.15     | 3.48     | 8.19     | 0.56    | 0       | 0.58    |
| 2-3.e8411/1/2519   | PREDICTED: filamin-A-inte       | 512841708 | XP_00491457  | 5.44     | 4.65    | 3.43     | 1.87     | 1.45     | 9.14   | 0.84     | 2.38     | 3.1      | 0.22    | 0       | 0.1     |
| 1-2.e43099/1/1631  | PREDICTED: titin-like [Chel     | 591350793 | XP_00706984  | 1.11     | 0       | 0.8      | 0.04     | 0.94     | 0.11   | 2.42     | 1.93     | 1.2      | 0       | 0       | 0       |
| 1-2.e16800/2/1415  | alpha 1 type I collagen [Rana   | 3242649   | BAA29028.1   | 0        | 0       | 0        | 0        | 0        | 129.08 | 0        | 0        | 0        | 41.94   | 12.14   | 9.46    |
| 2-3.e22261/2/2050  | alpha 1 type I collagen [Rana   | 3242649   | BAA29028.1   | 37.44    | 1006.54 | 112.28   | 84.82    | 59.48    | 735.14 | 85.22    | 56.81    | 128.94   | 32.49   | 19.03   | 17.61   |
| 1-2.e29226/1/9331  | PREDICTED: 14-3-3 protein       | 831273285 | XP_01267895  | 80.42    | 14.95   | 1.55     | 36.2     | 1.36     | 0      | 34.18    | 40.01    | 40.09    | 0       | 17.37   | 0       |
| 1-2.e39671/1/1383  | --                              | --        | --           | 5.68     | 21.88   | 5.46     | 4.61     | 5.72     | 14.45  | 6.15     | 4.62     | 6.54     | 78.73   | 74.68   | 117.22  |
| 2-3.e11566/9/2336  | dehydrogenase/reductase SDI     | 166158027 | NP_00110742  | 70.48    | 26.65   | 58.69    | 60.94    | 50.31    | 45.78  | 92.61    | 49.53    | 105.85   | 13.66   | 13.77   | 32.59   |
| 3-6.e10238/4/3210  | PREDICTED: F-box-like/WI        | 705676379 | XP_01011698  | 3.55     | 4.73    | 1.44     | 0        | 0.64     | 0.96   | 1.14     | 0.84     | 0.68     | 0       | 0       | 0       |
| 3-6.e8757/1/3647   | PREDICTED: protein CDV3         | 847134819 | XP_01281997  | 0        | 11.59   | 1.45     | 3.89     | 0        | 3.2    | 2.55     | 1.09     | 0        | 0       | 0.47    | 0       |
| 1-2.e11682/1/1235  | Receptor-transporting protein   | 304434768 | NP_00113458  | 22.76    | 6.94    | 21.04    | 29.3     | 15.95    | 4.69   | 29.92    | 15.32    | 34.01    | 4.51    | 7.42    | 4.24    |
| 1-2.e27511/1/1632  | --                              | --        | --           | 101.41   | 8.8     | 24.79    | 40.83    | 41.25    | 13.13  | 51.51    | 36.01    | 37.56    | 9.94    | 17.09   | 4.74    |
| 1-2.e34954/1/6762  | PREDICTED: fructose-bisph       | 731506121 | XP_01059680  | 1630.23  | 14.48   | 705.15   | 482.24   | 1275.25  | 147.58 | 1334.5   | 1110.94  | 1845.5   | 417     | 447.75  | 283.01  |
| 1-2.e41169/1/1446  | --                              | --        | --           | 13.45    | 65.3    | 8.24     | 11.54    | 7.85     | 18.21  | 9.21     | 12.24    | 161.97   | 165.96  | 130.69  |         |
| 2-3.e7363/15/1872  | tropomodulin 4 (muscle) [Xei    | 148233551 | NP_00108736  | 50.19    | 23.35   | 84.05    | 60.52    | 56.1     | 67.15  | 55.22    | 73.07    | 83.82    | 18.99   | 16.84   | 19.08   |
| 3-6.e18549/1/2690  | myosin heavy chain, partial [I  | 4249697   | AAD13770.1   | 0.72     | 0       | 3.36     | 2.5      | 2.02     | 0.09   | 3.65     | 2.91     | 2.29     | 0.68    | 0.16    | 0.12    |
| 1-2.e17304/1/1684  | PREDICTED: collagen alpha       | 847130150 | XP_01281895  | 4.89     | 66.37   | 28.61    | 14.27    | 1.16     | 3.6    | 14.59    | 3.88     | 14.51    | 2.86    | 0.31    | 0.82    |
| 1-2.e46371/1/1797  | PREDICTED: tropomyosin a        | 847143254 | XP_01282187  | 7.1      | 0       | 6.11     | 7.53     | 2.35     | 0      | 5.06     | 3.54     | 18.61    | 0       | 0       | 0       |
| 3-6.e3051/7/2950   | kinectin [Xenopus (Silurana)    | 194018594 | NP_00112338  | 43.95    | 10.71   | 21.35    | 15.49    | 31.76    | 19.16  | 31.35    | 33.18    | 32.94    | 12.28   | 8.39    | 4.9     |
| 1-2.e17885/2/1573  | perioestin precursor [Xenopus   | 163915007 | NP_00110637  | 18.08    | 351.55  | 35.08    | 0.65     | 13.11    | 116.16 | 28.3     | 16.52    | 23.94    | 5.84    | 1.07    | 6.81    |
| 1-2.e22457/1/1698  | myosin, heavy chain 4, skelet   | 47575800  | NP_00100124  | 4.31     | 0       | 7.18     | 4.63     | 7        | 0      | 6.19     | 8.76     | 4.87     | 0.36    | 0.34    | 1.66    |
| 1-2.e51822/7/1689  | PREDICTED: myosin-4 [Xer        | 847156920 | XP_01282446  | 137.31   | 23.99   | 2420.63  | 1479.71  | 772.02   | 19.61  | 3905.99  | 922.63   | 1288.43  | 46.88   | 36.82   | 26.93   |
| 2-3.e60498/1/2566  | --                              | --        | --           | 10.63    | 1.1     | 27.11    | 23.9     | 8.24     | 2.07   | 13.29    | 30.77    | 23.37    | 7.86    | 2.28    | 1.99    |
| 2-3.e30807/1/2242  | --                              | --        | --           | 1.65     | 5.74    | 2.4      | 0.49     | 3.25     | 0      | 0.77     | 1.98     | 4.94     | 0       | 0       | 0       |
| 3-6.e19112/1/3714  | myosin heavy chain, partial [I  | 4249701   | AAD13772.1   | 4.62     | 0.14    | 8.16     | 5.63     | 6.17     | 0.04   | 6.01     | 11.3     | 7.51     | 2.32    | 2.16    | 1.25    |
| 3-6.e17411/1/3023  | PREDICTED: obscurin isofo       | 847141062 | XP_01282115  | 23.42    | 13.65   | 31.36    | 36.46    | 30.14    | 38.68  | 59.08    | 53.35    | 82.14    | 17.41   | 17.82   | 16.56   |
| 1-2.e37266/1/1382  | PREDICTED: nebulin isofon       | 847166510 | XP_01282661  | 234.09   | 42.48   | 387.26   | 330.33   | 190.89   | 178.84 | 270.66   | 398      | 313.1    | 118.56  | 46.5    | 99.83   |
| 1-2.e44007/1/1492  | --                              | --        | --           | 0.47     | 0       | 1.85     | 1.83     | 1.81     | 0      | 3.95     | 4.37     | 6.3      | 0       | 0       | 0       |
| 2-3.e9333/5/2420   | abhydrolase domain-containi     | 349501031 | NP_00100677  | 0.82     | 2       | 0        | 0        | 0.95     | 0.44   | 0        | 0        | 0        | 2.07    | 2.96    | 2.41    |
| 2-3.e23039/1/2333  | --                              | --        | --           | 14.08    | 1.92    | 15.31    | 4.95     | 14.61    | 0.45   | 31.44    | 35.9     | 50.29    | 0       | 9.38    | 18.78   |
| 2-3.e56611/1/2203  | PREDICTED: matrix Gla pro       | 301612298 | XP_00293565  | 21.46    | 54.88   | 224.99   | 0        | 149.91   | 7.08   | 122.66   | 23.89    | 125.08   | 0       | 5.39    | 9.56    |
| 3-6.e14807/1/3174  | phosphofruktokinase, muscle     | 148224874 | NP_00108692  | 26.85    | 0       | 2.34     | 28.96    | 15.46    | 1.63   | 11.82    | 18.57    | 16.29    | 8.22    | 0.51    | 2.4     |
| 1-2.e30144/1/1287  | --                              | --        | --           | 7.13     | 10.61   | 5.81     | 2.62     | 10.33    | 11.93  | 3.85     | 3.3      | 1.79     | 72.55   | 46.95   | 39.97   |
| 1-2.e19898/1/1180  | endophilin-A2 [Xenopus (Sil     | 45360901  | NP_989126.1  | 0        | 0       | 2.32     | 0        | 0        | 0      | 0        | 0        | 0.32     | 13.33   | 6.01    | 7.62    |
| 1-2.e18541/1/1911  | RecName: Full=Gelsolin; Alt     | 121119    | P14885.1     | 0        | 64.91   | 42.65    | 20.01    | 0        | 0      | 0        | 35.46    | 41.85    | 0       | 0       | 0       |
| 1-2.e18852/3/1040  | PREDICTED: tropomyosin a        | 831547267 | XP_01272688  | 26065.16 | 1187.26 | 40659.96 | 30607.13 | 34230.61 | 855.77 | 31324.35 | 37199.42 | 25119.95 | 8768.28 | 9305.26 | 8479.72 |
| 1-2.e48528/1/1622  | --                              | --        | --           | 0        | 29.53   | 0        | 0.4      | 0        | 1.58   | 0        | 0        | 0        | 15.86   | 10.8    | 1.25    |
| 3-6.e13597/1/3044  | mitochondrial 2-oxoglutarate    | 71895777  | NP_00102568  | 1.68     | 0       | 4.52     | 2.47     | 2.9      | 1.87   | 6.11     | 4.2      | 8.42     | 0       | 0.49    | 2.56    |
| 2-3.e33216/1/4581  | --                              | --        | --           | 454.24   | 36      | 270.47   | 869.35   | 1013.26  | 509.78 | 2442.02  | 1262.42  | 2788.25  | 684.78  | 656.86  | 390.45  |
| 2-3.e56842/1/2665  | --                              | --        | --           | 0.43     | 6.13    | 0.44     | 2.31     | 2.52     | 8.76   | 2.93     | 1.86     | 1.92     | 35.08   | 31.21   | 64.58   |
| 1-2.e38894/1/1686  | --                              | --        | --           | 31.17    | 20.01   | 18.09    | 71.53    | 23.25    | 1.54   | 6.41     | 31.47    | 24.57    | 0       | 0.93    | 0.46    |
| 2-3.e38261/113/238 | PREDICTED: ras GTPase-ac        | 558228880 | XP_00613832  | 114.3    | 130.79  | 75.38    | 50       | 61.25    | 184.57 | 54.22    | 55.07    | 25.68    | 14.6    | 6.55    | 13.5    |
| 2-3.e19426/1/2158  | phosphoglucose isomerase [E     | 20067633  | CAC83783.1   | 594.49   | 92      | 548.43   | 749.4    | 745.04   | 179.2  | 481.16   | 616.03   | 705.45   | 176.09  | 100.3   | 212.43  |
| 1-2.e14466/1/1247  | --                              | --        | --           | 3.22     | 3.19    | 1.52     | 0.46     | 3.25     | 4.76   | 0        | 1.42     | 2.26     | 26.54   | 42.21   | 17.73   |
| 1-2.e28632/1/1999  | Myozenin-1-like [Xenopus la     | 148237556 | NP_00107945  | 85.23    | 4.12    | 98.2     | 90.9     | 93.61    | 83.16  | 99.82    | 84.98    | 103.46   | 20.63   | 21.69   | 31.94   |
| 1-2.e40683/1/1740  | cebpd, CCAAT/enhancer bin       | 89273345  | CAJ81462.1   | 0        | 0       | 0        | 3.07     | 0        | 0.93   | 24.72    | 12.84    | 0        | 0       | 0       | 0       |
| 2-3.e25619/1/1937  | --                              | --        | --           | 3.63     | 11.72   | 9.41     | 8.26     | 6.36     | 33.68  | 12.42    | 3.79     | 8.15     | 0.79    | 0.51    | 2.18    |
| 3-6.e11376/2/3083  | PREDICTED: long-chain fatt      | 512839272 | XP_00491424  | 0        | 0.6     | 0.11     | 0.2      | 1.72     | 1.3    | 0        | 0.28     | 0        | 4.26    | 2.92    | 6.82    |
| 1-2.e50641/1/1491  | PREDICTED: actin, alpha ca      | 803091489 | XP_00401102  | 199.98   | 143.05  | 424.36   | 206.93   | 206.18   | 192.76 | 192.47   | 260.37   | 268.43   | 83.06   | 45.48   | 68.44   |
| 2-3.e24429/1/2023  | autocrine motility factor recej | 147901912 | NP_00108315  | 0        | 0       | 2.86     | 0        | 2.98     | 0      | 1.71     | 0.93     | 1.67     | 0       | 0       | 0       |
| 2-3.e3894/5/2641   | solute carrier family 38, mem   | 58332320  | NP_00101105  | 59.89    | 38.36   | 58.23    | 34.19    | 43.65    | 40.86  | 36.59    | 45.74    | 49.86    | 12.06   | 7.51    | 14.45   |

|                    |                                 |           |             |          |          |          |          |          |          |          |          |          |          |          |          |
|--------------------|---------------------------------|-----------|-------------|----------|----------|----------|----------|----------|----------|----------|----------|----------|----------|----------|----------|
| 2-3.c62846/1/2652  | phosphofructokinase, muscle     | 148224874 | NP_00108692 | 20.56    | 0.9      | 8.73     | 33.15    | 20.67    | 3.92     | 17.52    | 19.28    | 20.19    | 7.07     | 0        | 5.92     |
| 1-2.e52348/2/1575  | alpha 1 type I collagen [Rana   | 3242649   | BAA29028.1  | 9.48     | 295.55   | 38.78    | 38.22    | 23.73    | 270.47   | 38.41    | 34.95    | 80.76    | 13.6     | 9.09     | 9.04     |
| 2-3.e56664/1/2240  | Transposable element Tcb1 tr    | 317419272 | CBN81309.1  | 20.78    | 5.52     | 19.41    | 11.23    | 24.09    | 9.8      | 17.76    | 32.52    | 20.33    | 7.78     | 2.8      | 6.43     |
| 2-3.c16384/1/2164  | PREDICTED: collagen alpha       | 512841609 | XP_00293490 | 1.19     | 0        | 3.57     | 1.66     | 0.04     | 0        | 2.6      | 2.86     | 2.81     | 0        | 0        | 0.31     |
| 1-2.e41069/1/4687  | PREDICTED: tenomodulin [        | 847171214 | XP_01280901 | 19.31    | 134.35   | 32.86    | 7.39     | 5.68     | 78.73    | 5.98     | 10.58    | 10.46    | 0.54     | 0.97     | 0        |
| 2-3.e54780/1/2294  | --                              | --        | --          | 1.76     | 1.21     | 2.31     | 2.19     | 1.89     | 1.87     | 2.86     | 2.14     | 5.56     | 0.2      | 0.38     | 0.42     |
| 2-3.c35881/1/2098  | --                              | --        | --          | 9.85     | 3.63     | 13.69    | 14.04    | 19.43    | 3.48     | 14.84    | 18.49    | 23.65    | 2.93     | 5.34     | 5.08     |
| 2-3.e13811/2/2143  | PREDICTED: RNA-binding          | 512850834 | XP_00294294 | 10.37    | 3.72     | 10.71    | 7.67     | 8.04     | 4.34     | 12.46    | 6.81     | 8.63     | 1.94     | 1.87     | 0.96     |
| 2-3.e27449/1/2134  | pecanex-like protein 4 [Xeno]   | 148228914 | NP_00108266 | 0.53     | 0        | 2.25     | 1.05     | 0.51     | 0.83     | 0        | 0        | 0.12     | 2.66     | 5.93     | 3.32     |
| 1-2.e51966/42/1541 | PREDICTED: myosin-4 [Xen]       | 847156920 | XP_01282446 | 8104.8   | 176.65   | 14502.74 | 11822.71 | 11262.28 | 55.03    | 6946.93  | 14122.91 | 11306.84 | 3808.04  | 2510.81  | 3153.79  |
| 1-2.e26750/6/1428  | eukaryotic translation elongat  | 148231139 | NP_00108844 | 6.83     | 27.34    | 12.95    | 10.89    | 6.54     | 34.71    | 8.32     | 7.79     | 12.32    | 0        | 0        | 3.55     |
| 1-2.e26283/2/1257  | transgelin [Xenopus (Siluranc   | 71896187  | NP_00102557 | 21.62    | 23.84    | 10.9     | 19.79    | 27.67    | 16.35    | 19.4     | 10.09    | 21.01    | 269.42   | 145.85   | 257.75   |
| 3-6.e18762/4/3676  | myosin heavy chain, partial [I  | 4249701   | AAD13772.1  | 1.42     | 0.1      | 5.04     | 3.75     | 3.2      | 0        | 3.87     | 3.35     | 3.12     | 0.76     | 0.34     | 0.52     |
| 2-3.e10570/1/2121  | --                              | --        | --          | 2.19     | 26.88    | 1.42     | 2.62     | 1.02     | 5.18     | 2.2      | 1.65     | 2.71     | 28.35    | 39.44    | 37.97    |
| 1-2.e29283/1/1662  | calsequestrin 1 (fast-twitch, s | 148231736 | NP_00108022 | 196.44   | 26.38    | 339.23   | 249.64   | 337.05   | 279.46   | 303.78   | 334.4    | 328.1    | 94.8     | 62.98    | 111.99   |
| 3-6.e18307/1/3608  | PREDICTED: myosin-4 [Ailh       | 301771630 | XP_00292123 | 1.86     | 0.12     | 3.67     | 2.92     | 3.75     | 0        | 1.81     | 3.02     | 3.53     | 0.5      | 0.42     | 0.28     |
| 2-3.e2689/6/2296   | PREDICTED: phosphogluco         | 847117435 | XP_01281625 | 15.54    | 17.28    | 23.7     | 7.47     | 10.23    | 93.67    | 8.29     | 13.07    | 16.58    | 3.01     | 3.12     | 2.5      |
| 1-2.e1815/52/1651  | PREDICTED: F-actin-cappin       | 52502623  | XP_00505782 | 195.57   | 65.3     | 224.59   | 190.02   | 191.68   | 180.45   | 156.24   | 243.18   | 160.08   | 51.75    | 3.58     | 93.24    |
| 1-2.e12059/1/1401  | --                              | --        | --          | 18.35    | 28.99    | 24.36    | 5.04     | 16.75    | 10.18    | 6.01     | 5.11     | 4.77     | 75.55    | 54       | 129.27   |
| 2-3.e18648/2/2420  | --                              | --        | --          | 80.95    | 12.64    | 57.16    | 73.35    | 65.51    | 53.47    | 51.78    | 74.63    | 94.78    | 19.52    | 15.75    | 20.81    |
| 2-3.e60691/1/2168  | Putative uncharacterized tran   | 449282618 | EMC89440.1  | 0.81     | 115.53   | 0        | 13.75    | 2.33     | 37.6     | 8.1      | 8.15     | 0.73     | 115.8    | 160.47   | 85.51    |
| 2-3.e20637/1/1909  | --                              | --        | --          | 0.35     | 0        | 0.29     | 0        | 0.52     | 0        | 0        | 0        | 0        | 8.5      | 5.53     | 31.75    |
| 1-2.e43170/1/1459  | --                              | --        | --          | 2.53     | 3.63     | 0        | 0        | 1.84     | 2.75     | 0.24     | 0.84     | 1.19     | 19.86    | 16.72    | 19.04    |
| 1-2.e16454/4/1563  | glioma tumor suppressor canc    | 148228700 | NP_00109002 | 0        | 0        | 0        | 0        | 0        | 13.02    | 0        | 0        | 0        | 26.2     | 33.63    | 0        |
| 1-2.e4799/1/1485.1 | PREDICTED: matrix Gla pro       | 301612298 | XP_00293565 | 34.25    | 18.52    | 70.75    | 24.03    | 48.65    | 6.2      | 87.32    | 24.31    | 63.44    | 11.17    | 14.56    | 8.35     |
| 2-3.e5036/3/2673   | autocrine motility factor recej | 147901912 | NP_00108315 | 3.37     | 1.69     | 0        | 1.44     | 0        | 0        | 0        | 0        | 1.04     | 3.27     | 1.92     | 0        |
| 2-3.e16237/5/1967  | voltage dependent calcium ch    | 11414934  | BAB18559.1  | 20.8     | 43.43    | 17.6     | 11.45    | 10.75    | 91.54    | 5.06     | 13.32    | 23       | 1        | 0        | 1.03     |
| 2-3.e27016/3/2200  | PREDICTED: mothers again        | 558224886 | XP_00613681 | 0        | 2.57     | 0.9      | 2.35     | 0        | 0        | 1.47     | 0.84     | 1.36     | 0        | 0        | 0        |
| 2-3.e17616/1/2253  | PREDICTED: polyadenylate        | 847099772 | XP_01281235 | 38.45    | 15.37    | 19.58    | 13.35    | 8.59     | 9.91     | 10.04    | 20.91    | 13.04    | 1.12     | 2.87     | 4.09     |
| 1-2.e28311/1/1870  | collagen, type II, alpha 1, par | 374533628 | AEZ53727.1  | 0        | 0        | 0.01     | 0        | 0        | 6.44     | 0        | 6.93     | 7.02     | 0        | 0        | 0        |
| 1-2.e46162/1/1377  | PREDICTED: protein FAM2         | 512809591 | XP_00294112 | 0        | 1.12     | 0.64     | 0.76     | 1.5      | 0        | 0.83     | 0        | 0        | 12.99    | 18.63    | 6.02     |
| 2-3.e9923/1/2342   | interferon-related developme    | 148227722 | NP_00109024 | 0        | 0        | 2.02     | 0        | 0        | 6.04     | 11.3     | 4.65     | 0.62     | 0        | 0        | 0        |
| 3-6.e10236/1/2796  | alpha1 type II collagen [Cync   | 5360532   | BAA82043.1  | 4.62     | 106.08   | 14.08    | 3.44     | 2.46     | 23.11    | 3.52     | 8.1      | 5.12     | 0.7      | 0.2      | 1.36     |
| 1-2.e45202/1/5025  | actin, alpha skeletal muscle B  | 820145793 | KKX13565.1  | 8109.88  | 2538.92  | 15521.19 | 10206.97 | 12636.96 | 12546.45 | 11456.8  | 16400.85 | 11023.89 | 5663.65  | 3384.59  | 2384.91  |
| 2-3.e62222/3/2164  | RecName: Full=Voltage-dep       | 46576355  | O57483.1    | 29.49    | 12.96    | 14.48    | 1.04     | 29.45    | 36.29    | 20.45    | 27.95    | 39.24    | 8.96     | 0.63     | 11.85    |
| 1-2.e45071/1/1432  | PREDICTED: collagen alpha       | 663272682 | XP_00849548 | 0        | 0        | 0        | 0        | 3.04     | 3.07     | 0        | 0        | 0        | 3.6      | 3.16     | 5.86     |
| 2-3.e34375/1/4375  | transforming growth factor-bi   | 118403632 | NP_00107232 | 56.69    | 20.15    | 66.62    | 58.74    | 41.39    | 29.23    | 55.03    | 68.54    | 55.64    | 20.6     | 9.41     | 19.25    |
| 2-3.e4015/4/1943   | cysteine-rich secretory protei  | 73853836  | NP_00102745 | 0        | 3.18     | 0.47     | 10.03    | 13.34    | 2.1      | 21.04    | 10.75    | 15.47    | 0.39     | 11.42    | 0.42     |
| 3-6.e9821/1/2700.1 | --                              | --        | --          | 0        | 6.16     | 0.8      | 0        | 0.08     | 6.39     | 0        | 0        | 0        | 2.4      | 1.92     | 4.49     |
| 1-2.e3263/1/1649   | nuclear receptor subfamily 4,   | 147903779 | NP_00108015 | 65.79    | 249.91   | 26.51    | 37.97    | 82.5     | 19.33    | 33.53    | 53.07    | 76.05    | 23.25    | 17.87    | 5.63     |
| 3-6.e5415/1/3098   | PREDICTED: glycogen phos        | 512834332 | XP_00293541 | 2.91     | 0        | 1.93     | 1.63     | 0.64     | 0.5      | 1.49     | 1.69     | 1.96     | 0        | 0.43     | 0        |
| 1-2.e14999/1/1522  | larval type I keratin [Rana cat | 134140868 | ABO61147.1  | 2.48     | 0.67     | 2.34     | 0.95     | 2.12     | 0.31     | 2.08     | 2.17     | 1.26     | 0        | 0        | 0        |
| 1-2.e29748/1/1749  | --                              | --        | --          | 17.65    | 6.78     | 13.28    | 12.12    | 10.04    | 6.51     | 25.56    | 13.17    | 16.1     | 4.32     | 5.99     | 2.62     |
| 3-6.e19130/1/3587  | PREDICTED: myosin heavy         | 831281475 | XP_01267182 | 1.14     | 0.14     | 4.33     | 3.67     | 3.35     | 0        | 3.14     | 3.6      | 3.39     | 0.34     | 0.54     | 0.75     |
| 2-3.e26151/2/2484  | PREDICTED: E3 ubiquitin-p       | 512849807 | XP_00293652 | 10.82    | 16.53    | 17.81    | 8.22     | 8.36     | 6.27     | 10.76    | 10.1     | 20.92    | 2.61     | 0        | 6.3      |
| 3-6.e4959/2/3186   | ubiquitin-conjugating enzym     | 1381181   | AAB02656.1  | 0.01     | 0        | 1.15     | 0.41     | 0        | 0        | 2.65     | 5.6      | 0.77     | 0        | 0        | 0        |
| 3-6.e10070/1/3331  | alanyl-tRNA synthetase [Xen     | 189217804 | NP_00112134 | 17.72    | 60.85    | 22.2     | 15.02    | 16.76    | 74.38    | 22.68    | 19.3     | 14.04    | 3.69     | 4.34     | 6.66     |
| 1-2.e2623/12/1821  | IMP (inosine 5'-monophosphi     | 148222892 | NP_00108241 | 282.34   | 104.02   | 173.91   | 121.71   | 136.03   | 84.82    | 99.27    | 140.99   | 184.4    | 33.75    | 65.65    | 30.83    |
| 1-2.e22377/1/1530  | popeye domain containing 2      | 148222019 | NP_00108796 | 6.81     | 1.56     | 3.69     | 0        | 2.34     | 5.58     | 2.08     | 2.64     | 7.64     | 0        | 0        | 0.19     |
| 1-2.e20819/1/4155  | PREDICTED: actin, alpha sk      | 795473616 | XP_01189147 | 0        | 0        | 0        | 0        | 0        | 50.18    | 29.08    | 2.89     | 34.52    | 0        | 1.26     | 0        |
| 3-6.e7302/1/2638   | PREDICTED: glypican-5-lik       | 512866823 | XP_00491786 | 75.7     | 6.62     | 46.08    | 66.97    | 55.3     | 9        | 52.98    | 42.35    | 84.47    | 10.68    | 19.61    | 20.41    |
| 1-2.e11857/1/6131  | PREDICTED: myosin bindin        | 847128061 | XP_01281857 | 38.65    | 43.3     | 136.97   | 87.93    | 0        | 5.83     | 159.41   | 85.96    | 89.48    | 31.98    | 22.6     | 20.77    |
| 1-2.e16104/49/1495 | PDZ and LIM domain 7 (enig      | 148223185 | NP_00108073 | 25.6     | 76.88    | 42.32    | 66.67    | 31.9     | 96.32    | 99.64    | 98.31    | 42.86    | 35.09    | 24.22    | 9.85     |
| 3-6.e4130/2/4538   | collagen, type I, alpha 2 prec  | 147898763 | NP_00108072 | 18.75    | 0        | 21.82    | 9.43     | 56.78    | 384.05   | 18.43    | 15.05    | 55.69    | 0.09     | 0        | 1.69     |
| 1-2.e3251/2/782    | myosin light chain, phosphor    | 148225444 | NP_00108400 | 54118.92 | 10066.39 | 85775.33 | 65433.59 | 79178.71 | 65694.52 | 70435.63 | 88657.82 | 66214.14 | 27276.37 | 19717.48 | 21593.25 |
| 1-2.e16998/1/1254  | PREDICTED: phospholipid-i       | 301614897 | XP_00293692 | 10.47    | 0.55     | 11.84    | 9.82     | 9.05     | 0.31     | 5.59     | 11.67    | 8.79     | 1.56     | 0.36     | 1.3      |
| 1-2.e2512/9/1569   | LOC100145085 protein [Xen       | 165971391 | AAI58516.1  | 12.05    | 7.3      | 10.87    | 19.01    | 14.57    | 3.8      | 13.5     | 8.11     | 15.1     | 0.7      | 2.5      | 3.63     |
| 2-3.e62312/2/2410  | PREDICTED: myosin-4 isofo       | 632943616 | XP_00788704 | 1.9      | 0        | 4.13     | 2        | 3.55     | 0        | 3.04     | 3.8      | 3.11     | 0.43     | 0.37     | 0.38     |

|                    |                                                |           |             |          |         |          |          |          |          |          |          |          |         |         |         |
|--------------------|------------------------------------------------|-----------|-------------|----------|---------|----------|----------|----------|----------|----------|----------|----------|---------|---------|---------|
| 1-2.c25999/1/1500  | diacylglycerol O-acyltransferase               | 147901247 | NP_00108320 | 0.11     | 0.2     | 0        | 0.14     | 0.18     | 0.05     | 0        | 0        | 0.05     | 4.5     | 1.54    | 7.94    |
| 1-2.c21512/33/1379 | calsequestrin 1 (fast-twitch, skeletal muscle) | 148231736 | NP_00108022 | 1982.77  | 297.69  | 2724.14  | 2315.88  | 3049.35  | 2869.18  | 2746.11  | 3165.15  | 2794.53  | 1001.12 | 658.31  | 966.07  |
| 1-2.c52264/8/1347  | PREDICTED: myosin-4 [Xer]                      | 847156920 | XP_01282446 | 137.61   | 26.52   | 2612.32  | 2146.33  | 1051.88  | 14.96    | 5462.36  | 1251.06  | 1522.71  | 70.28   | 49.13   | 0       |
| 3-6.c8036/1/2732   | --                                             | --        | --          | 30.16    | 2.04    | 10.06    | 25.84    | 15.46    | 2.81     | 18.29    | 16.57    | 19.9     | 3.35    | 2.73    | 7.55    |
| 1-2.c46410/1/1648  | PREDICTED: sialic acid synthase                | 301612838 | XP_00293591 | 1.89     | 0       | 0        | 3.67     | 2.37     | 2.2      | 0        | 0        | 0.36     | 7.84    | 8.29    | 3.88    |
| 1-2.c44248/1/1429  | PREDICTED: cytosolic non-specific phosphatase  | 591359345 | XP_00705465 | 27.68    | 0       | 3.66     | 40.22    | 6.28     | 0        | 0        | 20.33    | 11.23    | 204.2   | 110.82  | 135.55  |
| 3-6.c15514/1/3134  | PREDICTED: angio-association protein           | 602656532 | XP_00743395 | 0.35     | 4.17    | 0.2      | 0.33     | 0.27     | 0.56     | 1.69     | 1.84     | 1.61     | 0.27    | 0       | 0.1     |
| 1-2.c52471/1/1434  | Myozenin-1-like [Xenopus laevis]               | 148237556 | NP_00107945 | 576.91   | 44.31   | 668.79   | 774.85   | 814.46   | 621.95   | 828.81   | 792.86   | 784.05   | 264.47  | 233.52  | 236.76  |
| 1-2.c43476/1/1419  | ubiquitin thioesterase zranb1                  | 183986621 | NP_00111690 | 0        | 14.62   | 27.91    | 36.85    | 24.01    | 1.15     | 14.67    | 7.45     | 19.34    | 7.9     | 0       | 0.08    |
| 1-2.c22654/3/1153  | troponin T [Hyla chrysoscelis]                 | 69219560  | AAZ04163.1  | 10122.26 | 2073.04 | 17965.94 | 14147.51 | 14757.52 | 11129.84 | 13493.94 | 17624.33 | 12549.12 | 5273.14 | 3959.14 | 4385.19 |
| 2-3.c13804/1/2225  | PREDICTED: nebulin isoform                     | 847166512 | XP_01282661 | 11.15    | 0       | 36.25    | 2.49     | 15.18    | 0        | 47.98    | 17.58    | 0        | 0       | 0       | 0       |
| 3-6.c8447/1/6433.3 | --                                             | --        | --          | 10.51    | 177.42  | 5.42     | 25.46    | 5.4      | 24.73    | 11.36    | 4.77     | 10.78    | 161.06  | 295.8   | 123.95  |
| 2-3.c39659/1/2162  | PREDICTED: UTP--glucose 6-phosphate            | 847127397 | XP_01281836 | 198.01   | 14.37   | 97.18    | 183.91   | 155.72   | 23.49    | 174.48   | 159.15   | 184.01   | 52.9    | 42.17   | 58.82   |
| 1-2.c25374/1/1478  | PREDICTED: rho GTPase-activating protein       | 847148808 | XP_01282258 | 3.25     | 10.44   | 1.95     | 5.89     | 2.18     | 4.92     | 3.9      | 3.5      | 3.18     | 43.72   | 65.83   | 50.32   |
| 2-3.c13258/1/2172  | PREDICTED: cytoplasmic dynein heavy chain      | 530648788 | XP_00531093 | 0        | 0.63    | 0        | 1.01     | 0.99     | 0.46     | 0.65     | 0        | 0        | 9.44    | 4.43    | 6.52    |
| 3-6.c2720/1/3163   | myosin heavy chain, partial [Xer]              | 4249697   | AAAD13770.1 | 1.27     | 0       | 4.48     | 3.18     | 3.38     | 0        | 3.8      | 3.51     | 3.79     | 0.72    | 0.77    | 0.45    |
| 1-2.c27238/36/1638 | Hepatoma-derived growth factor                 | 226372168 | ACOS1709.1  | 0        | 0       | 0        | 0        | 0        | 2.02     | 0        | 0        | 0        | 15.27   | 0       | 15.97   |
| 1-2.c17518/1/1484  | PREDICTED: UAP56-interacting protein           | 512859648 | XP_00491695 | 12.79    | 12.04   | 17.34    | 22.3     | 18.44    | 73.95    | 40.54    | 15.67    | 23.18    | 4.7     | 10.43   | 4.83    |
| 2-3.c3125/5/2074   | PREDICTED: myosin-4 [Xer]                      | 847156920 | XP_01282446 | 49.69    | 17.41   | 0.89     | 35.76    | 25.31    | 2.82     | 61.61    | 76.61    | 56.17    | 14.72   | 44.77   | 4.72    |
| 2-3.c51962/2/2315  | tin2 protein [Xenopus laevis]                  | 166796755 | AAI59153.1  | 16.48    | 6.8     | 20.23    | 21.01    | 15.83    | 11.84    | 22.75    | 15.33    | 24.53    | 9.05    | 4.54    | 3.15    |
| 3-6.c16377/1/3543  | myosin, heavy chain 4, skeletal muscle         | 47575800  | NP_00100124 | 1.22     | 0       | 3.15     | 2.26     | 1.15     | 0.04     | 2.3      | 1.55     | 1.74     | 0.16    | 0.13    | 0.25    |
| 2-3.c4190/2/2570.1 | --                                             | --        | --          | 0        | 0       | 0        | 0        | 0.64     | 0        | 0        | 0        | 0        | 2.65    | 8.78    | 13.12   |
| 3-6.c14606/1/3830  | myosin, heavy chain 4, skeletal muscle         | 47575800  | NP_00100124 | 1.38     | 0.12    | 3.23     | 1.91     | 2.21     | 0        | 1.17     | 3        | 2.19     | 0.29    | 0.11    | 0.42    |
| 2-3.c5041/1/2291   | PREDICTED: collagen alpha 1(I) chain           | 847166754 | XP_01282667 | 5.65     | 79.3    | 18.6     | 13.42    | 13.81    | 108.81   | 19.12    | 11.15    | 17.8     | 6.53    | 2.57    | 2.89    |
| 2-3.c50572/2/2187  | --                                             | --        | --          | 11.8     | 18.8    | 8.48     | 6.28     | 0        | 0        | 0        | 0        | 0        | 10.89   | 0       | 10.96   |
| 1-2.c13300/5/1445  | PREDICTED: chondroadherin                      | 512871774 | XP_00491854 | 37.37    | 30.31   | 61.06    | 47.24    | 15.89    | 22.7     | 23.62    | 47.41    | 36.05    | 14.39   | 11.69   | 4.76    |
| 1-2.c6247/1/1538   | LOC100144989 protein [Xenopus laevis]          | 165971120 | AAI58328.1  | 3.46     | 0.42    | 1.96     | 2.55     | 1.09     | 1.77     | 8.17     | 5.44     | 4.31     | 1.59    | 0       | 0.68    |
| 2-3.c36665/1/2620  | von Willebrand factor A domain                 | 148228482 | NP_00107996 | 3.85     | 3.52    | 1.91     | 1.08     | 3.27     | 3.58     | 4.76     | 1.46     | 1.33     | 25.1    | 29.78   | 49.2    |
| 3-6.c10857/1/3453  | --                                             | --        | --          | 53.88    | 3.2     | 5.23     | 17.63    | 25.33    | 0        | 14.83    | 35.39    | 41.28    | 0       | 0       | 13.93   |
| 1-2.c24095/1/6125  | isocitrate dehydrogenase 2 (NADP-dependent)    | 148227256 | NP_00108032 | 246.57   | 126.31  | 221.86   | 212.81   | 166.21   | 200.52   | 272.81   | 182.83   | 260.56   | 61.43   | 89.2    | 58.35   |
| 1-2.c2224/2/1/1361 | LOC100126641 protein [Xenopus laevis]          | 213625404 | AAI70536.1  | 83.34    | 12.28   | 71.04    | 82.33    | 67.31    | 46.34    | 55.75    | 71.79    | 73.02    | 21.15   | 21.34   | 16.28   |
| 3-6.c18664/2/3307  | PREDICTED: C-Maf-inducible protein             | 512834466 | XP_00293818 | 4.16     | 10.99   | 5.17     | 2.88     | 6.59     | 2.58     | 0.6      | 0        | 1.26     | 8.78    | 13.02   | 9.68    |
| 1-2.c24920/1/1755  | PREDICTED: phosphorylase kinase                | 512838308 | XP_00293171 | 0.97     | 0       | 0.9      | 0.68     | 1.98     | 0        | 2.15     | 2.55     | 3.08     | 0       | 0.5     | 0       |
| 3-6.c5151/1/2988.1 | --                                             | --        | --          | 12.47    | 1.03    | 3.3      | 19.38    | 5.14     | 1.18     | 11.09    | 3.84     | 6.92     | 1.71    | 0.38    | 1.35    |
| 2-3.c3096/1/2595   | --                                             | --        | --          | 12.57    | 1.29    | 1.53     | 5.26     | 4.34     | 0.44     | 1.87     | 6.23     | 5.7      | 0.2     | 0.98    | 0.39    |
| 2-3.c7037/1/2274   | exocyst complex component 1                    | 189217627 | NP_00112126 | 5.43     | 0.71    | 4.46     | 1.57     | 1.65     | 0        | 1.22     | 3.08     | 3.08     | 0       | 0       | 0.5     |
| 2-3.c40175/1/2071  | serine hydroxymethyltransferase                | 148231095 | NP_00108035 | 2.29     | 16.56   | 6.17     | 3.1      | 3.49     | 0        | 3.13     | 2.27     | 4.22     | 0.95    | 0       | 0       |
| 1-2.c22016/2/1687  | phosphofructokinase, muscle                    | 148224874 | NP_00108692 | 66.86    | 7.06    | 19.64    | 71.16    | 39.36    | 17.24    | 70.87    | 45.28    | 89.85    | 17.21   | 19.06   | 22.66   |
| 1-2.c45402/1/6314  | PREDICTED: actin, alpha 1                      | 637243920 | XP_00321452 | 129.93   | 16.16   | 184.13   | 331.63   | 190.68   | 751.4    | 425.39   | 344.31   | 258.08   | 71.17   | 27.27   | 183.01  |
| 2-3.c35042/1/1961  | --                                             | --        | --          | 1.1      | 0       | 0        | 0        | 0        | 2.95     | 0        | 0        | 0        | 8.61    | 13.13   | 1.55    |
| 3-6.c18588/1/3218  | PREDICTED: myosin-4 [Xer]                      | 847156920 | XP_01282446 | 0.89     | 0       | 2.89     | 1.81     | 1.82     | 0        | 2.27     | 2.19     | 1.83     | 0.23    | 0.14    | 0.32    |
| 1-2.c5812/2/1262   | --                                             | --        | --          | 18.66    | 30.12   | 13.83    | 18.1     | 16.88    | 63.05    | 13.91    | 18.51    | 19.93    | 237.62  | 282.82  | 156.67  |
| 2-3.c63531/2/2181  | PREDICTED: myomesin-2 isoform                  | 847130012 | XP_01281893 | 3.71     | 2.35    | 4.82     | 6.2      | 4.74     | 9.97     | 8.96     | 5        | 11.09    | 2.81    | 0.79    | 1.45    |
| 3-6.c18765/1/2900  | myosin heavy chain, partial [Xer]              | 4249701   | AAAD13772.1 | 7.44     | 0.06    | 14.11    | 8.89     | 11.04    | 0.11     | 7.87     | 14.66    | 10.66    | 3.47    | 2.33    | 2.94    |
| 1-2.c36266/1/1185  | PREDICTED: cathepsin L isoform                 | 847145572 | XP_01282195 | 1.89     | 45.25   | 0.17     | 3.11     | 1.14     | 64.27    | 0.88     | 0.89     | 1.92     | 38.62   | 22.29   | 16.06   |
| 1-2.c7055/2/1286   | hexokinase 2 [Xenopus laevis]                  | 148230649 | NP_00109060 | 0        | 0.08    | 0        | 0        | 0        | 0.41     | 0        | 0        | 0        | 4.03    | 5.49    | 4.44    |
| 1-2.c52446/3/1680  | PREDICTED: myosin-4 [Xer]                      | 847156920 | XP_01282446 | 4545.7   | 115.76  | 8029.94  | 6320.53  | 6440.73  | 47.91    | 4541.1   | 8667.25  | 5312.41  | 2052.55 | 1302.31 | 1499.33 |
| 2-3.c32335/1/1823  | Chain B, Structure Of The Cytoskeleton         | 198443360 | 3EB6        | 2.91     | 4.33    | 1.43     | 0.68     | 0.71     | 0.68     | 2.44     | 2.12     | 4.48     | 0.69    | 0       | 0       |
| 2-3.c50438/1/2064  | --                                             | --        | --          | 0.97     | 2.2     | 1.7      | 0.32     | 0.3      | 0        | 0.37     | 1.72     | 2.4      | 0       | 0       | 0       |
| 2-3.c45452/2/2478  | PREDICTED: phosphorylase kinase                | 847120381 | XP_01281710 | 5.6      | 1.61    | 2.48     | 13.29    | 5.69     | 2.27     | 8.07     | 6.38     | 10.65    | 1.48    | 2.74    | 1.56    |
| 3-6.c16262/1/3102  | --                                             | --        | --          | 24.65    | 0.99    | 18.47    | 36.51    | 40.87    | 4.27     | 11.8     | 21.95    | 35.22    | 4.54    | 2.15    | 5.82    |
| 1-2.c36782/1/1589  | Keratin, type I cytoskeletal 15                | 678146122 | KFV15273.1  | 1525.24  | 432.52  | 1017.38  | 1398.28  | 525.66   | 312.37   | 1266.33  | 1403.73  | 1096.37  | 584.44  | 272.73  | 339.58  |
| 1-2.c46183/1/1981  | actin, alpha cardiac muscle 2                  | 45361557  | NP_089355.1 | 0        | 0.5     | 2.67     | 0.37     | 2.09     | 0        | 1.79     | 3.42     | 1.49     | 0       | 0       | 0       |
| 1-2.c5100/9/1726   | plasminogen activator inhibitor 1              | 47575766  | NP_00100122 | 377.45   | 38.59   | 287.35   | 334.22   | 198.05   | 308.35   | 324.37   | 219.91   | 353.34   | 96.44   | 114.52  | 73.86   |
| 3-6.c19042/4/3303  | alanyl-tRNA synthetase [Xenopus laevis]        | 189217804 | NP_00112134 | 4.96     | 12.26   | 3.47     | 1.51     | 2.81     | 14.42    | 4.09     | 2.73     | 2.17     | 0.23    | 0.2     | 0.84    |
| 1-2.c39495/2/1625  | PREDICTED: laminin subunit gamma 2             | 512844752 | XP_00293635 | 32.15    | 32.31   | 29.61    | 24.33    | 13.71    | 26.69    | 21.24    | 30.1     | 15.45    | 7.02    | 2.18    | 7.96    |
| 2-3.c28428/1/1913  | PREDICTED: tropoelastin 2                      | 847162839 | XP_01282564 | 60.97    | 1.05    | 37.3     | 82.95    | 25.88    | 0.34     | 57.1     | 48.47    | 30.1     | 13.73   | 11.43   | 14.58   |
| 1-2.c46644/1/1707  | cytosolic 5'-nucleotidase 3A                   | 187607205 | NP_00112013 | 13.9     | 1.79    | 25.52    | 49.67    | 29.72    | 15.56    | 39.24    | 32.93    | 39.94    | 2.62    | 6.41    | 18.93   |

|                   |                                 |           |             |          |        |          |          |          |        |         |         |          |         |         |         |
|-------------------|---------------------------------|-----------|-------------|----------|--------|----------|----------|----------|--------|---------|---------|----------|---------|---------|---------|
| 1-2.c50494/1/1564 | PREDICTED: retinoic acid r      | 847104579 | XP_01281331 | 6.57     | 45.93  | 7.53     | 9.03     | 3.33     | 14.67  | 10.66   | 5.33    | 9.21     | 91.5    | 119.81  | 106.7   |
| 2-3.c26792/1/2570 | LOC734179 protein [Xenopu       | 84570116  | AAH10785.1  | 154.01   | 173.49 | 142.2    | 108.04   | 123.5    | 148.59 | 108.3   | 114.18  | 134.52   | 35.34   | 23.55   | 49.68   |
| 2-3.c48518/1/2135 | PREDICTED: LOW QUALI            | 731286412 | XP_0106115C | 0        | 0      | 0        | 0        | 2.59     | 7.73   | 0       | 4.71    | 4.35     | 0       | 0       | 0       |
| 2-3.c48098/1/1874 | PREDICTED: band 4.1-like j      | 847168904 | XP_01280815 | 9.59     | 0.16   | 8.84     | 1.34     | 0.99     | 0      | 7.22    | 3.19    | 7.67     | 0       | 0       | 2.43    |
| 1-2.c35435/1/7811 | uncharacterized protein LOC:    | 148226670 | NP_00107975 | 11576.77 | 210.62 | 13763.67 | 16985.47 | 10917.86 | 576.36 | 7839.12 | 8821.66 | 18449.94 | 3988.51 | 1522.33 | 2571.07 |
| 2-3.c16841/1/2252 | PREDICTED: metastasis-ass       | 512877662 | XP_00491926 | 0        | 0      | 3.28     | 1.52     | 0        | 1.08   | 0.86    | 0       | 0        | 5.64    | 10.39   | 8.55    |
| 2-3.c42759/1/2146 | --                              | --        | --          | 13.06    | 168.2  | 29.22    | 21.78    | 15.51    | 62.56  | 16.56   | 19.71   | 25.62    | 7.86    | 4.67    | 4.49    |
| 1-2.c20805/3/1418 | tripartite motif-containing prc | 56118797  | NP_00100818 | 22.06    | 14.74  | 24.81    | 23.39    | 19.69    | 39.49  | 32.82   | 33.03   | 28.44    | 8.31    | 16.96   | 2.7     |
| 1-2.c26073/8/1390 | thrombospondin-4 precursor      | 118404528 | NP_00107267 | 65.13    | 76.06  | 81.75    | 45.44    | 34.2     | 47.18  | 31.65   | 48.47   | 50.36    | 11.62   | 13.78   | 12.47   |
| 1-2.c6780/1/1630  | PREDICTED: uncharacterize       | 847117050 | XP_01281612 | 0.28     | 1.58   | 0        | 0.03     | 0.05     | 2.22   | 0       | 0       | 1.27     | 10.72   | 10.58   | 12.13   |
| 2-3.c39403/1/2577 | tubb4 protein [Xenopus (Silu    | 39794463  | AAH64270.1  | 9.05     | 3.45   | 0.75     | 3.44     | 1        | 0      | 5.4     | 4.45    | 0        | 0       | 0       | 0       |
| 1-2.c45716/1/1583 | PREDICTED: flotillin-2 isofr    | 847099593 | XP_01281225 | 20.57    | 0      | 9.9      | 5.76     | 4.47     | 0.17   | 7.85    | 10.68   | 17.21    | 0       | 0       | 6.64    |
| 2-3.c2925/1/2146  | --                              | --        | --          | 5.95     | 6.22   | 4.68     | 4.88     | 8.75     | 10.31  | 7.88    | 8.24    | 13.76    | 1.25    | 2.26    | 1.14    |
| 1-2.c8806/8/1658  | LRRN4 C-terminal like [Xen      | 163914763 | NP_00110666 | 7.91     | 13.63  | 14.28    | 21.65    | 21.59    | 10.81  | 32.41   | 9.72    | 15.45    | 226.26  | 226.84  | 217.3   |
| 1-2.c39777/1/1466 | carbonyl reductase 3 [Xenopt    | 160420331 | NP_00108536 | 1.2      | 0      | 3.3      | 0        | 1.14     | 0      | 7.2     | 1.69    | 1.91     | 0       | 0       | 0       |
| 3-6.c13122/2/3182 | PREDICTED: collagen alpha       | 512847530 | XP_00491535 | 2.73     | 0      | 5.15     | 3.74     | 0.61     | 0      | 3.57    | 9.01    | 3.02     | 0       | 0       | 0.34    |
| 1-2.c20977/1/1258 | PREDICTED: aminoacyl tRN        | 847087804 | XP_01281867 | 34.66    | 81.13  | 68.35    | 28.34    | 46.5     | 262.48 | 44.21   | 31.71   | 34.15    | 12.41   | 5.42    | 11.04   |
| 1-2.c52443/4/1318 | PREDICTED: complement f         | 847125972 | XP_01281793 | 0        | 0      | 1.31     | 0.69     | 0.85     | 1.71   | 1.08    | 0       | 0        | 6.66    | 11.29   | 16.68   |
| 3-6.c13377/1/3989 | PREDICTED: obscurin isof        | 847141081 | XP_01282120 | 15.02    | 5.08   | 23.88    | 21.96    | 18.5     | 25.24  | 21.97   | 19.75   | 31.81    | 6.35    | 6.1     | 9.29    |
| 1-2.c43239/1/1284 | PREDICTED: serine/threonir      | 795092231 | XP_01182796 | 0        | 0      | 0        | 6.93     | 0        | 0      | 0       | 0       | 0        | 4.82    | 5.32    | 3.2     |
| 2-3.c24246/1/2185 | PREDICTED: sarcalumenin i       | 733909809 | XP_01071766 | 4.01     | 0      | 0.86     | 1.91     | 0.96     | 0.56   | 1.71    | 2.3     | 4.22     | 0.38    | 0       | 0.35    |
| 2-3.c4983/1/2188  | microtubule-associated protei   | 147902447 | NP_00108223 | 15.4     | 1.52   | 9.48     | 7.83     | 10       | 0.64   | 3.57    | 10.18   | 13.13    | 1.62    | 2.35    | 0       |
| 2-3.c54427/1/2105 | S-adenosylmethionine mitoc      | 52345544  | NP_00100482 | 4.23     | 5.59   | 1.45     | 0        | 0.38     | 2.16   | 1.73    | 1.32    | 2.09     | 0       | 0       | 0       |
| 2-3.c55056/1/2345 | --                              | --        | --          | 4.68     | 1.66   | 5.55     | 6.11     | 3.95     | 3.52   | 3.19    | 6.56    | 6.87     | 0.55    | 0.41    | 2       |
| 1-2.c49998/1/1339 | immunoglobulin superfamily      | 148226668 | NP_00109068 | 0.57     | 2.2    | 0.3      | 0.85     | 0.35     | 1.18   | 0       | 0.83    | 0        | 14.45   | 13      | 5.5     |
| 2-3.c40633/1/2734 | --                              | --        | --          | 0.16     | 0      | 0.02     | 1.24     | 0        | 0      | 0       | 0       | 0        | 2.69    | 0.76    | 2.02    |
| 2-3.c63445/1/1962 | myosin heavy chain, partial [l  | 4249697   | AAD13770.1  | 11.8     | 3.68   | 432.58   | 328.89   | 111.81   | 0      | 845.98  | 182.31  | 296.92   | 11.66   | 18.62   | 8.87    |
| 1-2.c44796/1/1824 | olfactory receptor family C st  | 329130754 | AEB77813.1  | 1.56     | 0.18   | 1.21     | 0.38     | 0.67     | 1.18   | 1.14    | 2.4     | 2.95     | 0       | 0       | 0.27    |
| 3-6.c19155/1/4056 | PREDICTED: myosin-4-like        | 557022470 | XP_00601145 | 1.62     | 0.14   | 3.96     | 2.88     | 3.08     | 0      | 3.04    | 4.26    | 2.85     | 0.93    | 0.69    | 0.5     |
| 1-2.c32939/1/1565 | --                              | --        | --          | 1.19     | 4.67   | 1.22     | 1.57     | 2.98     | 1.95   | 2.3     | 1.32    | 1.05     | 21.39   | 17.17   | 36.63   |
| 1-2.c43414/1/1140 | coronin, actin binding protein  | 148230198 | NP_00108377 | 3.22     | 12.75  | 5        | 11.75    | 6.08     | 10.01  | 11.15   | 0.85    | 8.47     | 113.07  | 76.42   | 70.3    |
| 1-2.c29211/1/1556 | nucleolar protein 16 [Xenopu    | 147902850 | NP_00108573 | 0        | 11.53  | 0.2      | 9.69     | 0        | 0      | 0       | 9.98    | 8.71     | 0       | 0       | 0       |
| 3-6.c4057/1/3596  | PREDICTED: proline-rich nu      | 224048441 | XP_00219808 | 15.42    | 5.96   | 5.61     | 6.72     | 8.61     | 1.91   | 3.96    | 7.47    | 2.44     | 0.76    | 1.73    |         |
| 1-2.c4205/2/1195  | PREDICTED: dual adapter f       | 847087333 | XP_01281705 | 16.7     | 15.45  | 2.13     | 9.39     | 0        | 6.05   | 8.65    | 0.57    | 0        | 62.42   | 35.31   | 100.95  |
| 2-3.c21559/1/2315 | --                              | --        | --          | 19.21    | 227.27 | 13.84    | 24.04    | 21.66    | 92.82  | 26.89   | 26.8    | 34.18    | 427.38  | 345.02  | 311.6   |
| 2-3.c22471/1/2756 | PREDICTED: uncharacterize       | 672020667 | XP_00877445 | 3.56     | 0.04   | 1.86     | 0        | 1.77     | 2.08   | 0.03    | 0       | 3.53     | 16.61   | 12.59   | 21.85   |
| 2-3.c34931/1/2250 | PREDICTED: collagen alpha       | 847130150 | XP_01281895 | 2.02     | 30.37  | 6.88     | 3.45     | 0.86     | 0      | 3.81    | 3.24    | 2.94     | 1.01    | 0.3     | 0       |
| 3-6.c6699/1/2765  | PREDICTED: glycerol-3-ph        | 637265166 | XP_00810217 | 246.6    | 11.34  | 179.34   | 349.57   | 215.93   | 74.31  | 156.61  | 187.27  | 273.18   | 66.2    | 35.13   | 90.32   |
| 1-2.c40054/1/1441 | --                              | --        | --          | 0        | 10.68  | 3.81     | 1.47     | 3.51     | 4.55   | 0       | 0       | 0.82     | 10.82   | 8.48    | 9.63    |
| 2-3.c3107/1/2035  | --                              | --        | --          | 7.39     | 66.55  | 3.63     | 5.32     | 9.07     | 26.24  | 5.51    | 4.82    | 7.28     | 84.66   | 55.53   | 78.22   |
| 1-2.c39075/1/2153 | calsequestrin 1 (fast-twitch, s | 148231736 | NP_00108022 | 24.45    | 3.19   | 41.87    | 26.55    | 42.83    | 36.44  | 35.48   | 40.78   | 40.68    | 15.31   | 11.94   | 8.36    |
| 1-2.c41615/1/4512 | --                              | --        | --          | 27.36    | 170.96 | 23.75    | 35.19    | 21.9     | 121.07 | 78      | 34.16   | 38.51    | 673.05  | 656.58  | 442.33  |
| 3-6.c14818/1/3070 | PREDICTED: myomegalin-li        | 847014351 | XP_01280435 | 2.15     | 2.99   | 3.6      | 4.47     | 2.14     | 6.46   | 2.39    | 6.2     | 7.11     | 0.62    | 1.05    | 1.4     |
| 1-2.c28878/1/1600 | PREDICTED: caveolin-2-lik       | 301611463 | XP_00293525 | 3.36     | 4.48   | 6.53     | 0.91     | 2.66     | 14.81  | 2.08    | 2.5     | 2.7      | 0.17    | 0.13    | 0       |
| 1-2.c14110/1/1280 | PREDICTED: myosin-4-like        | 301611451 | XP_00293525 | 7.69     | 0.55   | 11.58    | 8.75     | 9.91     | 0      | 7.46    | 12.57   | 11.94    | 2.29    | 1.85    | 2.01    |
| 1-2.c41790/1/1707 | myosin heavy chain, partial [l  | 4249701   | AAD13772.1  | 25.56    | 0      | 59.93    | 50.96    | 46.42    | 0      | 31.94   | 53.81   | 48.01    | 20.14   | 10.82   | 10.62   |
| 3-6.c14798/1/3775 | actinin, alpha 4 [Xenopus lae   | 147901835 | NP_00108703 | 0        | 7.16   | 1.92     | 3.05     | 0        | 0      | 4.63    | 2.6     | 1.74     | 1.66    | 0       | 0       |
| 2-3.c33756/1/1891 | PREDICTED: phospholipase        | 512861567 | XP_00293695 | 0.64     | 0      | 0        | 0        | 0        | 0.94   | 0.01    | 0.14    | 0        | 16.59   | 26.87   | 2.89    |
| 1-2.c48539/1/1240 | Map2k3 protein [Xenopus lac     | 50604142  | AAH77760.1  | 0        | 0      | 0        | 3.3      | 0        | 0      | 0       | 0       | 0        | 8.37    | 16.03   | 2.08    |
| 3-6.c11195/1/2917 | --                              | --        | --          | 25.85    | 1.18   | 12.8     | 23.41    | 18.18    | 4.73   | 16.55   | 16.46   | 21.93    | 5.03    | 2.93    | 7.49    |
| 2-3.c43740/1/2261 | GTP-binding protein 2 [Xeno     | 118404418 | NP_00107271 | 36.35    | 9.39   | 14.93    | 15.06    | 34.81    | 5.86   | 38.76   | 31.35   | 44.66    | 9.62    | 13.28   | 12.28   |
| 1-2.c43822/1/1783 | --                              | --        | --          | 29.69    | 0.87   | 7.89     | 14.78    | 13.94    | 3.54   | 11.04   | 18.61   | 21.54    | 2.59    | 1.86    | 3.02    |
| 1-2.c28122/2/1552 | G protein-coupled receptor ki   | 54606877  | NP_00100611 | 12.96    | 6.25   | 2.21     | 8.3      | 0.12     | 0      | 4.02    | 0       | 0        | 21.78   | 13.82   | 26.99   |
| 3-6.c13602/2/3485 | alpha 1 type I collagen [Rana   | 3242649   | BAA29028.1  | 0.46     | 7.66   | 1.17     | 0.84     | 1.06     | 7.73   | 1.12    | 0.57    | 1.46     | 0.13    | 0       | 0       |
| 2-3.c60332/1/2006 | --                              | --        | --          | 10.98    | 250.46 | 12.84    | 13.18    | 15.42    | 286.82 | 16.38   | 7.59    | 20.08    | 204.24  | 225.61  | 103.98  |
| 1-2.c14958/1/1888 | --                              | --        | --          | 415.2    | 170.23 | 256.39   | 376.95   | 186.57   | 11.03  | 50.41   | 262.73  | 200.22   | 6.82    | 4.67    | 10.71   |
| 1-2.c2795/3/1437  | PREDICTED: cold-inducible       | 837829631 | XP_00459565 | 0        | 13.34  | 5.44     | 0        | 0.31     | 7.14   | 0       | 0       | 0        | 22.26   | 35.31   | 0       |
| 2-3.c23031/1/2056 | PREDICTED: LOW QUALI            | 637377851 | XP_00812323 | 854.83   | 122.56 | 1834.94  | 1809.22  | 1690.84  | 833.33 | 804.33  | 1508    | 1831.44  | 289.31  | 238.58  | 783.15  |

|                    |                                |           |             |        |       |        |        |        |       |        |        |        |        |        |       |
|--------------------|--------------------------------|-----------|-------------|--------|-------|--------|--------|--------|-------|--------|--------|--------|--------|--------|-------|
| 2-3.c34033/1/2055  | PREDICTED: filamin-B isof      | 512839159 | XP_00491422 | 0      | 0     | 0      | 1.06   | 0      | 1.1   | 1.16   | 0      | 0      | 8.6    | 11.49  | 6.41  |
| 2-3.c4581/11/1993  | tyrosinase-related protein 1 p | 148223219 | NP_00108045 | 1.6    | 3.85  | 3.53   | 0.85   | 1.62   | 1.26  | 5.33   | 0.9    | 2.61   | 0      | 0      | 0.21  |
| 2-3.c53835/1/2033  | semaphorin-4A precursor [Xe    | 166158256 | NP_00110731 | 0      | 0     | 0      | 0      | 0      | 1.21  | 0      | 0      | 0      | 9.96   | 10.64  | 0     |
| 3-6.c4089/3/3443   | arginase-2, mitochondrial [Xe  | 118404488 | NP_00107268 | 38.48  | 9.97  | 33.42  | 7.83   | 42.58  | 0.97  | 53.87  | 31.32  | 27.28  | 0.03   | 5.73   | 26.15 |
| 1-2.c28006/1/1862  | PREDICTED: zinc finger pro     | 558191053 | XP_00612944 | 0      | 2.53  | 0      | 0.47   | 0.62   | 0     | 0.06   | 0.05   | 0      | 4.61   | 4.33   | 2.36  |
| 2-3.c28093/2/2423  | PREDICTED: PHD finger pr       | 301618658 | XP_00293871 | 0.39   | 0.02  | 0      | 0      | 0      | 3.49  | 1.28   | 1.64   | 3.11   | 0      | 0.56   | 0     |
| 2-3.c54547/1/1876  | --                             | --        | --          | 1.56   | 16.06 | 0      | 0.78   | 0.64   | 1.77  | 0      | 0      | 0      | 12.92  | 26.59  | 5.71  |
| 1-2.c8228/2/1609   | myozenin-1 [Xenopus (Silura    | 55742226  | NP_00100671 | 29.77  | 5.09  | 44.72  | 43.65  | 41.66  | 33.3  | 46.68  | 40.63  | 46.02  | 11.3   | 12.03  | 16.21 |
| 3-6.c10187/1/3370  | predicted protein [Nematostel  | 156383368 | XP_00163280 | 3.97   | 1.19  | 4.87   | 4.75   | 7.32   | 3.55  | 5.65   | 6.5    | 6.55   | 1.48   | 1.61   | 1.59  |
| 2-3.c16797/3/2253  | matrin-3 [Callithrix jacchus]- | 327365358 | NP_00119216 | 0      | 0     | 0      | 0      | 0.76   | 0.72  | 0      | 0      | 0      | 2.39   | 1.6    | 2.64  |
| 2-3.c46230/1/2482  | PREDICTED: LIM domain a        | 847100858 | XP_01281271 | 1.27   | 1.28  | 0      | 1.52   | 0.08   | 0.67  | 0      | 0      | 0.95   | 3.68   | 6.95   | 11.08 |
| 1-2.c18000/1/1618  | PREDICTED: tubulin alpha c     | 847163580 | XP_01282588 | 0      | 103.6 | 0      | 0      | 83.65  | 305.9 | 260.05 | 126.93 | 0      | 0      | 1.5    | 0     |
| 3-6.c8118/1/3064   | PREDICTED: E3 ubiquitin-p      | 821474903 | XP_01240095 | 11.29  | 0.06  | 0.08   | 2.93   | 5.49   | 0.25  | 5.01   | 6.8    | 5.53   | 0.99   | 3.2    | 0.29  |
| 2-3.c32273/1/2544  | PREDICTED: integrin alpha-     | 530603879 | XP_00529368 | 0.5    | 5.27  | 1.12   | 0      | 0.57   | 0.8   | 0.11   | 0.52   | 0.05   | 3.85   | 5.09   | 10.44 |
| 2-3.c27373/1/2014  | PREDICTED: glycerophosph       | 723552948 | XP_01029893 | 4.91   | 2.92  | 1.96   | 2.44   | 5.51   | 0.71  | 3.41   | 3.88   | 0.59   | 29.25  | 26.56  | 64.09 |
| 1-2.c23180/2/1443  | TPA_inf: tropoelastin 2a [Xe   | 296040422 | DAA12508.1  | 5.64   | 0.18  | 3.92   | 7.42   | 1.59   | 0     | 4.28   | 7.7    | 7.08   | 1.17   | 0.27   | 1.38  |
| 1-2.c34298/1/1277  | PREDICTED: plexin-B2 isof      | 847110120 | XP_01281457 | 5.35   | 6.95  | 0      | 2.77   | 1.99   | 3.58  | 1.97   | 0      | 0      | 20.97  | 12.88  | 10.2  |
| 1-2.c15042/2/1694  | PREDICTED: glycogen debr       | 847125952 | XP_01281792 | 10.07  | 0     | 8.2    | 18.91  | 6.25   | 2.37  | 5.73   | 7.13   | 15.11  | 1.57   | 2.36   | 1.52  |
| 2-3.c53647/1/1961  | --                             | --        | --          | 9.49   | 16.74 | 9.14   | 7.16   | 2.88   | 3.99  | 3.56   | 6.86   | 5.7    | 1.35   | 0.78   | 0.7   |
| 2-3.c23205/6/2632  | PREDICTED: uridine-cytidir     | 611978749 | XP_00747556 | 30.24  | 0.84  | 20.03  | 15.55  | 17.44  | 0.43  | 8.43   | 16.46  | 19.37  | 2.54   | 3.81   | 6.09  |
| 2-3.c26640/1/2181  | --                             | --        | --          | 1.9    | 2.68  | 1.81   | 0.92   | 1.6    | 1.59  | 4.56   | 2.59   | 4.73   | 0      | 0.15   | 1.29  |
| 1-2.c4105/2/1321   | PREDICTED: vimentin A2-li      | 512841962 | XP_00293220 | 311.7  | 6.5   | 290.73 | 254.46 | 140.29 | 0.13  | 271.63 | 308.18 | 239.39 | 112.63 | 168.61 | 17.37 |
| 2-3.c24094/1/2637  | PREDICTED: F-box only prc      | 512825033 | XP_00491234 | 27.58  | 1.16  | 12.28  | 21.96  | 27.91  | 5.59  | 16.03  | 18.81  | 16.5   | 5.02   | 3.93   | 5.61  |
| 2-3.c61732/1/2281  | --                             | --        | --          | 33.72  | 20.78 | 36.51  | 37.44  | 51.06  | 14.87 | 50.42  | 56.89  | 83.32  | 17.49  | 16.49  | 26.14 |
| 1-2.c10711/3/1356  | cordon-bleu WH2 repeat prot    | 148230755 | NP_00107964 | 32.66  | 4.13  | 10.41  | 16.02  | 24.08  | 7.95  | 21.96  | 12.35  | 19.77  | 0      | 11.54  | 2.69  |
| 1-2.c29873/1/1706  | --                             | --        | --          | 0      | 0     | 0.93   | 0      | 1.36   | 0     | 0      | 0      | 0      | 13.86  | 8.4    | 8.35  |
| 3-6.c10794/1/3009  | PREDICTED: RNA-binding         | 512850834 | XP_00294294 | 0.61   | 0     | 0.9    | 0.48   | 0.74   | 0.56  | 4.24   | 1.84   | 1.01   | 0      | 0.34   | 0.14  |
| 1-2.c11618/11/1377 | Ras-related associated with d  | 148236071 | NP_00108621 | 10.99  | 85.95 | 6.96   | 1.49   | 6.22   | 24.24 | 1.41   | 2.29   | 2.95   | 36.42  | 40.86  | 26.61 |
| 3-6.c5455/1/4108   | PREDICTED: collagen alpha      | 512867463 | XP_00293207 | 8.51   | 60.49 | 19     | 9.37   | 16.36  | 65.29 | 7.71   | 12.68  | 8.6    | 2.66   | 2.17   | 3.63  |
| 1-2.c19967/2/1694  | PREDICTED: nebulin isofon      | 847166504 | XP_01282661 | 15.93  | 8.31  | 88.3   | 54.85  | 0      | 0     | 63.55  | 42.51  | 30.33  | 18.16  | 4.41   | 17.52 |
| 3-6.c15944/1/2780  | PREDICTED: LOW QUALI           | 512830904 | XP_00293188 | 2.01   | 9.99  | 1.03   | 1.67   | 2.8    | 20.98 | 2.73   | 0.47   | 2.81   | 0.28   | 0      | 0.12  |
| 1-2.c22406/1/1175  | alpha 1 type I collagen [Rana  | 3242649   | BAA29028.1  | 0      | 0     | 0      | 0      | 0      | 67.06 | 0      | 0      | 0      | 9.96   | 30.54  | 5.9   |
| 1-2.c14613/1/1438  | PREDICTED: myosin-4 [Xer       | 847156920 | XP_01282446 | 59.62  | 4.64  | 508.5  | 236.81 | 390.54 | 0     | 171.33 | 193.68 | 109.3  | 53.24  | 31.27  | 68.77 |
| 2-3.c53936/1/1898  | adenylosuccinate synthetase i  | 148236946 | NP_00109001 | 17.72  | 5.77  | 13.29  | 16.84  | 16.79  | 4     | 12.26  | 12.03  | 19.66  | 3.95   | 4.48   | 3.32  |
| 2-3.c39576/2/2309  | --                             | --        | --          | 1.59   | 0     | 0      | 0.53   | 0      | 3.49  | 2.61   | 1.74   | 1.52   | 0      | 0.17   | 0.22  |
| 2-3.c22993/1/2150  | PREDICTED: multidrug resi      | 512867941 | XP_00293226 | 11.84  | 10.71 | 10.02  | 8      | 9.18   | 6.48  | 7.18   | 11.08  | 10.28  | 1.77   | 2.81   | 2.58  |
| 1-2.c49269/1/1268  | --                             | --        | --          | 2.18   | 64.05 | 4.02   | 2.67   | 5.62   | 15.91 | 5.93   | 7.11   | 4.67   | 0.66   | 0.52   | 0.92  |
| 1-2.c15193/2/1736  | F-box only protein 31 [Xenop   | 118405062 | NP_00107252 | 118.51 | 5.23  | 24.77  | 63.8   | 39.17  | 6.45  | 34.29  | 50.4   | 52.91  | 10.6   | 21.37  | 12.81 |
| 3-6.c14638/1/2869  | --                             | --        | --          | 55.5   | 31.41 | 28.63  | 38.57  | 53.63  | 101.1 | 176.79 | 100.32 | 121.28 | 46.73  | 45.32  | 33.25 |
| 2-3.c12114/1/2207  | UBA domain containing 1 [X     | 148235257 | NP_00108937 | 1.02   | 0.91  | 1.33   | 1.5    | 1.57   | 0.59  | 2.52   | 1.01   | 1.76   | 0.24   | 0      | 0     |
| 1-2.c29231/1/1405  | PREDICTED: microtubule-at      | 847101702 | XP_01281288 | 2.1    | 0     | 0      | 3.02   | 0      | 0     | 0      | 0      | 0      | 24     | 42.31  | 0.25  |
| 2-3.c29740/2/1873  | ryanodine receptor beta isof   | 29501272  | BAA04647.2  | 0      | 0.41  | 0      | 0      | 0      | 0     | 1.97   | 1.29   | 0.5    | 0      | 0      | 0     |
| 2-3.c45754/1/2163  | WD repeat and SOCS box-co      | 45361625  | NP_989387.1 | 9.03   | 45.92 | 10.35  | 10.26  | 8.62   | 20.29 | 13.18  | 14.8   | 13.6   | 1.75   | 3.2    | 6.02  |
| 1-2.c30305/1/1448  | --                             | --        | --          | 6.1    | 0     | 0      | 0.8    | 0      | 7.95  | 6.57   | 0.95   | 0      | 26.85  | 46.04  | 32.2  |
| 3-6.c12338/5/2777  | PREDICTED: uncharacterize      | 755867960 | XP_01129145 | 0      | 11.34 | 5.91   | 0.11   | 1.47   | 6.02  | 0.15   | 0      | 0.24   | 93.66  | 129.63 | 0.39  |
| 2-3.c54707/1/2384  | serine/arginine repetitive mat | 89269017  | CAJ83937.1  | 0      | 1.14  | 1.13   | 1.42   | 0.79   | 2.68  | 0.17   | 0      | 0      | 2.84   | 7.12   | 2.46  |
| 2-3.c9829/10/1911  | PREDICTED: dihydrolipeoyl      | 699633727 | XP_00990847 | 27.74  | 17.91 | 24.72  | 31.03  | 37.16  | 15.37 | 19.11  | 33.43  | 36.72  | 9.52   | 3.48   | 13.07 |
| 2-3.c62155/4/2317  | --                             | --        | --          | 63.89  | 27.16 | 25.32  | 120.72 | 24.75  | 21.37 | 34.25  | 46.02  | 121.7  | 5.09   | 0.68   | 5.13  |
| 1-2.c36134/1/1827  | --                             | --        | --          | 6.55   | 61.87 | 5.04   | 6.53   | 4.51   | 9.82  | 6.24   | 3.95   | 8.04   | 70.41  | 112.32 | 54.54 |
| 2-3.c20854/1/2262  | PREDICTED: alpha N-termin      | 301608515 | XP_00293383 | 0.31   | 1.47  | 1.51   | 2.57   | 1.91   | 10.19 | 3.46   | 1.48   | 2.4    | 0.18   | 0.07   | 0.15  |
| 2-3.c2148/11/2244  | PREDICTED: zinc finger pro     | 847155335 | XP_01282413 | 7.67   | 0     | 1.34   | 3.09   | 0.77   | 0     | 0      | 2.68   | 3.76   | 0      | 0      | 0     |
| 1-2.c22227/1/1315  | PREDICTED: RNA-binding         | 847153751 | XP_01282364 | 0      | 0     | 0      | 4.91   | 0      | 0     | 0      | 4.58   | 5.43   | 0      | 0      | 0     |
| 1-2.c50117/1/1669  | --                             | --        | --          | 9.51   | 4.48  | 0      | 6.3    | 6.3    | 4.93  | 5.88   | 5.21   | 3.2    | 53.41  | 60.16  | 81.97 |
| 2-3.c35670/1/2476  | --                             | --        | --          | 30.3   | 9.12  | 26.01  | 36.51  | 16.04  | 4.47  | 28.17  | 23.14  | 42.67  | 6.74   | 5.55   | 5.71  |
| 1-2.c22683/1/1296  | --                             | --        | --          | 3.87   | 4.26  | 19.48  | 11.96  | 10.03  | 12.17 | 16.2   | 14.23  | 22.15  | 6.89   | 1.92   | 3.79  |
| 2-3.c34496/1/2623  | --                             | --        | --          | 2.3    | 0.87  | 3.97   | 1.31   | 3.81   | 10.53 | 2.46   | 1.82   | 3.02   | 0.14   | 0.39   | 0.31  |
| 1-2.c30327/1/1573  | --                             | --        | --          | 4.62   | 22.72 | 0.89   | 5.52   | 5.02   | 11.61 | 5.85   | 3.9    | 1.5    | 38.71  | 34.42  | 72.34 |
| 2-3.c42249/1/2138  | PREDICTED: glycogen phos       | 556954754 | XP_00598898 | 9.97   | 0.21  | 4.8    | 7.25   | 7.31   | 2.19  | 7.53   | 8.77   | 11.54  | 2.42   | 2.09   | 2.02  |

|                   |                                 |           |             |          |         |          |          |          |         |          |          |          |         |         |         |
|-------------------|---------------------------------|-----------|-------------|----------|---------|----------|----------|----------|---------|----------|----------|----------|---------|---------|---------|
| 1-2.c29452/1/1285 | myosin heavy chain, partial [I  | 4249695   | AAD13769.1  | 885.57   | 298.65  | 348.99   | 301.68   | 293.15   | 36.55   | 378.25   | 468.87   | 399.53   | 130.86  | 308.72  | 31.37   |
| 2-3.e15942/5/2592 | protein SDA1 homolog [Xenopus   | 148236679 | NP_00108245 | 7.83     | 13.03   | 3.47     | 1.6      | 4.15     | 10.6    | 4.93     | 4.26     | 4.02     | 0.2     | 0.93    | 1.32    |
| 2-3.c62459/4/2260 | --                              | --        | --          | 0        | 18.7    | 0        | 0        | 0.22     | 42.41   | 0        | 0.51     | 2.75     | 18.1    | 17.07   | 15.14   |
| 2-3.c34560/1/1945 | predicted protein [Nematostel   | 156380608 | XP_00163186 | 0.22     | 5.55    | 0        | 4.41     | 3.34     | 5.18    | 0.69     | 2.16     | 1.06     | 26.18   | 50.2    | 20.07   |
| 2-3.c34816/2/2585 | --                              | --        | --          | 6.42     | 5.2     | 8.18     | 8.41     | 11.89    | 8.11    | 7.21     | 11.19    | 11.15    | 0       | 1.37    | 5.87    |
| 1-2.i19643/3/1539 | RecName: Full=Iroquois-clas     | 263432223 | O42261.2    | 4.54     | 31.4    | 3.13     | 3.97     | 3.87     | 13.23   | 8.71     | 2.54     | 6.44     | 65.95   | 68.8    | 77.39   |
| 2-3.c53345/1/2484 | PREDICTED: ATP-depende          | 512873634 | XP_00491868 | 0.73     | 1.01    | 0.62     | 1.06     | 0        | 1.03    | 1.06     | 1.26     | 0.37     | 0       | 0       | 0       |
| 3-6.e14961/1/2834 | alpha-catulin [Xenopus laevis   | 148237000 | NP_00108661 | 1.59     | 3.07    | 5.16     | 1.92     | 2.88     | 1.06    | 1.78     | 1.83     | 3.85     | 0.28    | 0       | 0.6     |
| 2-3.c43309/1/2482 | transmembrane protein 63A [     | 147906330 | NP_00108875 | 0        | 0       | 0        | 0        | 3.66     | 0.9     | 0        | 3.73     | 3.29     | 0       | 0       | 0       |
| 3-6.c16722/1/3197 | PREDICTED: transmembran         | 512856155 | XP_00294200 | 5.85     | 8.38    | 0        | 0.02     | 0        | 4.98    | 0        | 0        | 0        | 0       | 7.07    | 7.97    |
| 2-3.e12478/1/2395 | PREDICTED: collagen alpha       | 194224629 | XP_00191505 | 0        | 10.52   | 1.49     | 2.1      | 0.22     | 0.73    | 2.86     | 0        | 3.01     | 0       | 0       | 0       |
| 2-3.c25794/1/2191 | cysteine-rich secretory protei  | 73853836  | NP_00102745 | 0.12     | 2.4     | 0.13     | 6.08     | 8.43     | 0.61    | 15.45    | 7.57     | 9.47     | 0       | 8.89    | 0       |
| 2-3.c14285/2/2291 | alpha1 type II collagen [Cync   | 5360532   | BAA82043.1  | 2.65     | 101.28  | 18.81    | 9.14     | 1.8      | 19.83   | 5.36     | 4.45     | 5.88     | 0.64    | 0.77    | 1.51    |
| 2-3.c22247/1/2406 | N-acetylglucosamine kinase [    | 207028218 | NP_00112865 | 0.21     | 0.34    | 0.13     | 0.28     | 0.37     | 0       | 0.41     | 0        | 0        | 5.96    | 3.4     | 5.25    |
| 1-2.e21055/4/1363 | kelch-like protein 41 [Xenopus  | 45361273  | NP_989214.1 | 19.82    | 24.26   | 0        | 8.24     | 6.92     | 69.42   | 36.06    | 20.18    | 32.87    | 5.84    | 18.33   | 3.27    |
| 2-3.c35028/1/2147 | fragile X mental retardation s  | 147899444 | NP_00108178 | 35.89    | 21.35   | 25.5     | 6.59     | 4        | 8.42    | 11.62    | 9.77     | 10.9     | 1.74    | 0.7     | 5.13    |
| 2-3.c40760/1/2202 | pyruvate kinase PKM [Xenopus    | 148225037 | NP_00108434 | 0        | 0       | 0.86     | 0        | 0.25     | 6.57    | 3.4      | 0        | 0        | 32.68   | 54.92   | 17.23   |
| 2-3.c60503/1/2316 | PREDICTED: RAC-alpha sei        | 301622901 | XP_00294076 | 9.69     | 9.55    | 4.75     | 3.73     | 4.38     | 2.34    | 1.81     | 5.22     | 4.11     | 0       | 1.63    | 0.25    |
| 1-2.c12427/1/1791 | PREDICTED: glucose-6-pho        | 327288680 | XP_00322905 | 129.29   | 1.95    | 37.58    | 76.07    | 0.94     | 12.84   | 60.64    | 36.18    | 73.37    | 1.99    | 8.78    | 37.89   |
| 2-3.e11851/8/2182 | PREDICTED: collagen alpha       | 591360728 | XP_00705528 | 3.68     | 66.52   | 8.95     | 3.16     | 2.11     | 28.13   | 0.8      | 1.6      | 3.64     | 0       | 0.27    | 0       |
| 2-3.c39422/1/2230 | PREDICTED: collagen alpha       | 688603631 | XP_00929327 | 5.66     | 1.11    | 4.63     | 3.79     | 7.08     | 1.28    | 2.66     | 5.13     | 6.66     | 0.49    | 1.18    | 1.01    |
| 2-3.c27411/1/2321 | glycerophosphodiester phosphi   | 187607081 | NP_00112055 | 3.3      | 3.19    | 0        | 2.65     | 0        | 0.63    | 0.2      | 1.4      | 0        | 15.56   | 12.32   | 5.94    |
| 1-2.c46467/1/4679 | muscle creatine kinase [Xenopus | 147899942 | NP_00108007 | 16399.49 | 1495.38 | 11744.97 | 11879.68 | 12243.56 | 6365.12 | 10657.14 | 10084.84 | 10078.52 | 4723.24 | 2327.34 | 3414.03 |
| 2-3.c36572/1/2031 | PREDICTED: suppressor of t      | 847154706 | XP_01282391 | 2.92     | 6.34    | 1.91     | 0.6      | 2.56     | 2.98    | 2.54     | 1.87     | 1.71     | 21.22   | 40.09   | 28.63   |
| 1-2.c7427/1/1839  | --                              | --        | --          | 0        | 3.88    | 0.37     | 4.82     | 0        | 0       | 5.44     | 0.95     | 3.99     | 0       | 0.41    | 0.42    |
| 2-3.c24282/1/2441 | --                              | --        | --          | 21.86    | 249.75  | 12.93    | 26.75    | 16.54    | 34.45   | 20.61    | 18.29    | 22.51    | 226.79  | 393.38  | 179.47  |
| 1-2.c26920/1/1233 | --                              | --        | --          | 22.26    | 26.69   | 62.95    | 37.66    | 1.63     | 5.03    | 50.2     | 29.1     | 3.49     | 1.63    | 0       | 0       |
| 3-6.c3426/3/3257  | hypoxia-inducible factor 1 al   | 166343757 | ABY86629.1  | 4.08     | 5.91    | 0.47     | 4.71     | 5.37     | 2.7     | 8.67     | 3.14     | 4.45     | 1.19    | 0.85    | 1.67    |
| 3-6.e15179/1/6486 | myosin, heavy chain 4, skelet   | 47575800  | NP_00100124 | 0.3      | 0       | 1.82     | 1.35     | 1.12     | 0       | 1.77     | 1.69     | 1.42     | 0.21    | 0.08    | 0.2     |
| 2-3.c61980/1/2022 | --                              | --        | --          | 1.03     | 0.46    | 1.32     | 2.57     | 2.25     | 1.29    | 2.92     | 0.82     | 0.79     | 17.61   | 39.22   | 24.71   |
| 2-3.c11442/25/192 | Clysiine--tRNA ligase [Xenopus  | 47575822  | NP_00100125 | 116.6    | 167.4   | 76.5     | 58.22    | 66.81    | 128.32  | 125.81   | 67.29    | 83.54    | 30.77   | 14.92   | 42.28   |
| 2-3.c45772/1/2259 | pentraxin 3, long precursor [X  | 148226508 | NP_00109115 | 3.15     | 0.34    | 1.68     | 3.96     | 0.97     | 0.08    | 3.19     | 1.47     | 0.97     | 0.2     | 0       | 0.15    |
| 3-6.e10214/1/3383 | PREDICTED: LIM domain-t         | 847142931 | XP_01282174 | 1.49     | 0.13    | 6.25     | 2.63     | 3.01     | 2.12    | 1.93     | 2.94     | 4.91     | 0.18    | 0.22    | 1.37    |
| 2-3.c11813/2/2417 | --                              | --        | --          | 4.86     | 5.55    | 2.43     | 4.46     | 3.4      | 2.15    | 2        | 2.96     | 3.57     | 37.77   | 30.95   | 38.37   |
| 3-6.e2890/2/3785  | PREDICTED: hamartin [Xenopus    | 512863241 | XP_00294468 | 65.7     | 5.97    | 30.81    | 40.5     | 41.85    | 5.28    | 33.35    | 33.95    | 39.03    | 8.24    | 11.33   | 15.73   |
| 2-3.c7806/1/2314  | PREDICTED: GMP reductas         | 847133898 | XP_01281965 | 11.08    | 3.42    | 12.6     | 19.53    | 10.72    | 4.48    | 10.92    | 13.07    | 10.15    | 5.08    | 1.37    | 1.54    |
| 1-2.c43472/1/1865 | --                              | --        | --          | 2.42     | 60.05   | 9.88     | 3.78     | 0        | 8.13    | 7.21     | 4.38     | 10.46    | 0       | 0       | 0       |
| 3-6.c4428/2/3338  | uncharacterized protein LOC     | 148225160 | NP_00108922 | 8.14     | 61.81   | 26.31    | 10.53    | 11.21    | 55.25   | 13.1     | 4.73     | 13.96    | 1.23    | 2.47    | 4.92    |
| 1-2.c24233/1/1527 | protease, serine, 8 precursor [ | 148222777 | NP_00108172 | 0        | 0       | 0        | 0.34     | 0        | 0.64    | 0        | 0        | 0        | 0.52    | 4.06    | 5.82    |
| 2-3.c2051/20/2321 | heat shock 70kDa protein 9 (i   | 148228693 | NP_00108016 | 2.45     | 10.62   | 3.64     | 9.04     | 0.08     | 14.31   | 7.73     | 5.97     | 6.98     | 0       | 0.71    | 3.57    |
| 3-6.e12948/3/3596 | PREDICTED: RNA polymer          | 637246018 | XP_00810503 | 4.54     | 11.51   | 3.96     | 4.49     | 4.59     | 0.22    | 2.61     | 4.09     | 3.63     | 0       | 0       | 1.95    |
| 3-6.e11524/1/4750 | PREDICTED: myosin-4-like        | 301611451 | XP_00293525 | 2.96     | 0       | 5.39     | 4.97     | 4.91     | 0.08    | 5.77     | 6.83     | 4.33     | 2.74    | 1.29    | 0.98    |
| 2-3.c22311/1/2239 | myozenin-3 [Xenopus (Silura     | 58332250  | NP_00101127 | 0.82     | 7.19    | 5.26     | 0.6      | 1.05     | 39.01   | 1.83     | 0.76     | 1.88     | 0.07    | 0.05    | 0       |
| 2-3.e19084/3/2254 | leucine-rich repeat-containi    | 194332463 | NP_00112373 | 0.32     | 0       | 0        | 0.83     | 0        | 0       | 4.44     | 0        | 5.68     | 0       | 0       | 0       |
| 1-2.c48481/1/1551 | myosin, heavy chain 2, skelet   | 55742222  | NP_00100680 | 9.43     | 2.11    | 6.01     | 2.28     | 2.34     | 0.06    | 2.72     | 3.84     | 2.83     | 0.19    | 0.01    | 0.48    |
| 1-2.c36910/1/1866 | PREDICTED: LOW QUALI            | 617600050 | XP_00752244 | 0.59     | 5.25    | 1.28     | 0        | 0        | 1.12    | 3.42     | 0        | 3.35     | 0       | 0       | 0       |
| 2-3.c20294/1/2099 | --                              | --        | --          | 4.68     | 59.64   | 4.25     | 9.47     | 3.59     | 12.73   | 6.39     | 3.67     | 6.62     | 72.55   | 102.49  | 48.33   |
| 2-3.c43208/1/2196 | nuclear pore complex protein    | 148228663 | NP_00108744 | 2.05     | 0       | 0        | 0        | 0        | 0       | 3.48     | 0        | 2.8      | 0       | 0       | 0       |
| 3-6.e11772/5/2807 | collagen, type 1, alpha 2 prec  | 147898763 | NP_00108072 | 16.76    | 0       | 0.03     | 0.03     | 1.28     | 81.86   | 21.3     | 11.73    | 12.91    | 14.18   | 0       | 0       |
| 1-2.e2629/9/1645  | PREDICTED: nebulin isofor       | 847166508 | XP_01282661 | 0        | 0.4     | 0.59     | 0.93     | 1.01     | 0       | 1.66     | 0.81     | 1.92     | 0       | 0       | 0       |
| 1-2.e31345/1/1465 | PREDICTED: zinc finger BE       | 641785470 | XP_00531296 | 1.12     | 86.91   | 5.9      | 8.47     | 6.13     | 18.2    | 2.11     | 3.97     | 10.24    | 78.74   | 107.22  | 63.2    |
| 2-3.c12321/2/1890 | PREDICTED: LOW QUALI            | 697487074 | XP_00967463 | 1.1      | 4.39    | 25.36    | 8.47     | 21.73    | 16.67   | 11.08    | 17.44    | 12.44    | 2.4     | 0       | 7.96    |
| 2-3.e12633/1/2379 | --                              | --        | --          | 3.24     | 10.63   | 3.52     | 1.68     | 1.89     | 8.29    | 0.98     | 1.16     | 1.21     | 13.67   | 10.55   | 25.32   |
| 1-2.e49741/1/1814 | PREDICTED: NAD(P) trans         | 768393841 | XP_01159260 | 138.52   | 154.92  | 97.47    | 219.84   | 108.19   | 83.81   | 192.99   | 228.2    | 122.15   | 70.72   | 73.84   | 54.16   |
| 1-2.c22029/3/1756 | PREDICTED: glucose-6-pho        | 327288680 | XP_00322905 | 254.95   | 84.96   | 243.48   | 464.04   | 340.73   | 83.04   | 255.93   | 252.17   | 503.78   | 121.7   | 47.12   | 168.89  |
| 2-3.c29321/1/2507 | PREDICTED: homocysteine-        | 602651855 | XP_00743230 | 0        | 0       | 0        | 0        | 0        | 4.6     | 0        | 0        | 0        | 42.89   | 32.97   | 0       |
| 3-6.e13804/1/8671 | myosin, heavy chain 4, skelet   | 47575800  | NP_00100124 | 0.18     | 0       | 0.64     | 0.34     | 0.42     | 0       | 0.22     | 0.59     | 0.56     | 0       | 0       | 0       |
| 2-3.c10198/5/1962 | PREDICTED: dual specificit      | 847134985 | XP_01282003 | 15.48    | 23.16   | 0.06     | 0.8      | 4.5      | 14.43   | 2.79     | 8.16     | 8.69     | 2.96    | 0.67    | 0       |

|                    |                                 |           |             |        |         |          |          |          |         |          |          |          |         |         |         |
|--------------------|---------------------------------|-----------|-------------|--------|---------|----------|----------|----------|---------|----------|----------|----------|---------|---------|---------|
| 3-6.c18172/1/2871  | PREDICTED: myosin-3-like        | 557329602 | XP_00603770 | 0.12   | 6.96    | 1.41     | 0.8      | 0.43     | 58.63   | 0.68     | 1.1      | 0.35     | 0       | 0       | 0       |
| 2-3.c32898/1/2173  | --                              | --        | --          | 0.48   | 7.57    | 1.66     | 4.08     | 1.16     | 7.83    | 0.92     | 1.87     | 1.74     | 24.09   | 61.49   | 52.87   |
| 2-3.c55241/1/2063  | PREDICTED: DBH-like mor         | 512842438 | XP_00293636 | 0.01   | 0       | 0        | 0.6      | 1.37     | 0.51    | 0.21     | 0        | 0        | 3.59    | 3.85    | 4.65    |
| 2-3.c24749/7/2346  | PREDICTED: dual specificit      | 524976634 | XP_00508813 | 10.75  | 42.31   | 7.55     | 11.12    | 16.28    | 16.02   | 10.66    | 8.04     | 8.01     | 65.73   | 114.22  | 114.67  |
| 1-2.c25639/2/1346  | actin, alpha sarcomeric/skelet  | 45360805  | NP_989076.1 | 25.2   | 9.42    | 35.3     | 27.72    | 32.85    | 29.07   | 24.85    | 37.39    | 25.77    | 10.9    | 4.06    | 11.27   |
| 2-3.c12986/6/1975  | T-complex protein 1 subunit     | 56118448  | NP_00100787 | 74.01  | 128.8   | 62.68    | 43.98    | 39.95    | 129.6   | 55.41    | 63.64    | 30.91    | 26.26   | 23.02   | 5.64    |
| 2-3.c16642/1/2190  | PREDICTED: cytoplasmic d        | 847163111 | XP_01282573 | 1.95   | 0       | 2.65     | 2.66     | 0        | 0       | 3.24     | 0        | 2.59     | 0       | 0       | 0       |
| 3-6.c15004/1/2682  | PREDICTED: myosin-4 [Xer        | 847156920 | XP_01282446 | 1.76   | 0       | 2.44     | 1.28     | 1.12     | 0       | 1.31     | 1.16     | 1.4      | 0       | 0       | 0.16    |
| 2-3.c15470/1/2345  | PREDICTED: E3 ubiquitin-p       | 821474903 | XP_01240095 | 4.68   | 0.22    | 0        | 0.68     | 2.11     | 0.39    | 4.69     | 3.09     | 2.82     | 0.09    | 1.69    | 0.11    |
| 2-3.c58784/1/2454  | --                              | --        | --          | 456.76 | 19.06   | 346.43   | 1465.39  | 555.65   | 135.67  | 860.62   | 604.03   | 999.71   | 427.23  | 213.92  | 210.8   |
| 1-2.c27518/1/1050  | GTP-binding nuclear protein     | 678196368 | KFV63350.1  | 215.88 | 361.38  | 156.61   | 112.94   | 156.91   | 166.04  | 148.93   | 147.39   | 128.32   | 44.5    | 32.74   | 64.17   |
| 3-6.c19150/1/2859  | --                              | --        | --          | 17.74  | 3.59    | 52.73    | 39.37    | 45.5     | 26.66   | 37.97    | 23.86    | 50.87    | 13.6    | 4.87    | 17.36   |
| 1-2.c46418/1/1352  | PREDICTED: LOW QUALI            | 637377851 | XP_00812323 | 117.68 | 15.44   | 233.03   | 244.89   | 241.96   | 123.97  | 105.66   | 210.04   | 249.18   | 50.37   | 38.31   | 103.41  |
| 1-2.c33004/1/3717  | actin, alpha cardiac muscle 2   | 45361557  | NP_989355.1 | 17672  | 2925.13 | 25457.44 | 20359.02 | 23430.02 | 19339.6 | 17185.39 | 26544.81 | 18558.93 | 8634.64 | 5465.71 | 8510.04 |
| 1-2.c38142/1/1542  | isocitrate dehydrogenase [NA    | 71896117  | NP_00102555 | 72.2   | 19.56   | 48.44    | 38.52    | 51.05    | 36.71   | 29.73    | 43.94    | 34.11    | 10.56   | 11.31   | 12.97   |
| 2-3.c7616/2/2430.2 | beta-hexosaminidase subunit     | 187607505 | NP_00112060 | 9.97   | 8.35    | 4.66     | 15.2     | 10.82    | 2.95    | 10.48    | 4.01     | 5.95     | 72.33   | 57.18   | 125.41  |
| 2-3.c16203/1/1780  | predicted protein [Nematostel   | 156353049 | XP_00162285 | 2.53   | 12.82   | 4.77     | 5.02     | 1.1      | 6.61    | 4.14     | 2.84     | 4.78     | 36.21   | 89.15   | 51.91   |
| 2-3.c49559/1/2240  | PREDICTED: starch-binding       | 301617462 | XP_00293815 | 0.87   | 0       | 0        | 2.1      | 0.36     | 0       | 3.11     | 0.3      | 1.3      | 0       | 0       | 0       |
| 2-3.c30607/1/2473  | --                              | --        | --          | 8.83   | 4.69    | 13.06    | 9.83     | 35.36    | 6.24    | 13.85    | 8.21     | 26.1     | 2.5     | 5.2     | 1.93    |
| 2-3.c47252/1/2237  | PREDICTED: bifunctional gl      | 512844004 | XP_00293606 | 18.34  | 42.38   | 26.21    | 17.47    | 19.15    | 27.35   | 18.87    | 19.55    | 24.11    | 5.31    | 4.24    | 9.53    |
| 1-2.c46430/1/1373  | Ras association (RalGDS/AF      | 157426943 | NP_00109874 | 0.99   | 3.7     | 1.4      | 3.32     | 0        | 0       | 1.23     | 0        | 13.42    | 11.83   | 9.98    | 9.98    |
| 1-2.c2165/15/1553  | isovaleryl-CoA dehydrogenas     | 58332612  | NP_00101138 | 75.74  | 50.9    | 64.54    | 86.27    | 64.29    | 40.96   | 51.24    | 51.18    | 67.29    | 17.06   | 23.9    | 17.21   |
| 1-2.c39980/1/9175  | PREDICTED: phosphate carr       | 847109028 | XP_01281415 | 29.34  | 27.41   | 21.18    | 64.65    | 20       | 13.99   | 20.67    | 47.71    | 66.08    | 16.91   | 9.26    | 4.85    |
| 1-2.c49938/1/1557  | PREDICTED: protein phosph       | 675610817 | XP_00893405 | 6.5    | 0.01    | 8.9      | 4.78     | 6.44     | 7.96    | 2.23     | 0.04     | 2.32     | 20.12   | 30.56   | 16.33   |
| 1-2.c32094/53/1813 | PREDICTED: fragile X ment       | 637372583 | XP_00322991 | 122.39 | 91.91   | 111.96   | 82.65    | 137.97   | 182.29  | 145.65   | 87.35    | 115.7    | 19.84   | 29.1    | 66.14   |
| 1-2.c33054/1/1457  | Sodium/potassium-transportin    | 565315033 | ETE67008.1  | 0.77   | 2.78    | 0.8      | 1.13     | 0.56     | 4.12    | 0        | 0        | 0        | 11.64   | 9.97    | 0       |
| 1-2.c25421/1/3503  | serum paraoxonase/arylester     | 148232543 | NP_00108064 | 0.94   | 6.68    | 1.41     | 0.11     | 0.02     | 7.18    | 1.04     | 1.75     | 0.51     | 20.89   | 21.7    | 22.61   |
| 1-2.c24290/2/1780  | --                              | --        | --          | 6.69   | 43.42   | 3.12     | 2.7      | 4.8      | 19.25   | 11.38    | 2.07     | 6.44     | 72.96   | 78.8    | 65.57   |
| 3-6.c16779/1/3663  | --                              | --        | --          | 9.37   | 4.93    | 20.18    | 10.65    | 15.28    | 25.02   | 14.63    | 13.18    | 20.09    | 3.48    | 5.44    | 6.59    |
| 1-2.c8407/12/1662  | SET and MYND domain-con         | 148235066 | NP_00108563 | 50.86  | 89.61   | 45.41    | 42.35    | 34.15    | 37.59   | 38.42    | 37.01    | 45.9     | 16.01   | 10.42   | 13.3    |
| 2-3.c17756/1/1941  | --                              | --        | --          | 18.34  | 5.06    | 11.51    | 18.54    | 12.01    | 16.35   | 13.55    | 12.84    | 18.72    | 2.06    | 5.52    | 5.44    |
| 2-3.c18517/21/2109 | PREDICTED: aldehyde dehy        | 729766577 | XP_01058043 | 40.19  | 22.87   | 104.81   | 29.54    | 98.67    | 67.56   | 64.12    | 88.29    | 61.34    | 31.53   | 24.78   | 21.14   |
| 1-2.c14116/2/1473  | growth hormone inducible tra    | 148231426 | NP_00108005 | 35.17  | 0       | 0.9      | 0.5      | 9.97     | 11.97   | 10.93    | 14.87    | 11.96    | 0       | 0       | 8.3     |
| 1-2.c52252/13/1418 | NADH dehydrogenase subun        | 146149047 | YP_00116545 | 338.96 | 158.6   | 157.43   | 112.15   | 109.43   | 112.86  | 268.38   | 179.26   | 212.92   | 104.78  | 41.45   | 82.59   |
| 2-3.c15844/1/2603  | collagen, type III, alpha 1 (E) | 147905732 | NP_00108354 | 13.53  | 130.09  | 28.65    | 15.5     | 46.64    | 301.62  | 27.1     | 11.32    | 20.03    | 8.47    | 2.38    | 6.92    |
| 1-2.c25839/1/1782  | 72 kDa type IV collagenase [    | 148231336 | NP_00108065 | 0.99   | 51.09   | 3.01     | 6.28     | 6.41     | 25.06   | 9.21     | 0.64     | 11.86    | 72.4    | 65.11   | 91.85   |
| 1-2.c30814/1/2510  | PREDICTED: LOW QUALI            | 637377851 | XP_00812323 | 147.36 | 14.31   | 130.05   | 102.63   | 112.08   | 57.57   | 105.59   | 126.17   | 115.53   | 35.4    | 27.8    | 45.79   |
| 1-2.c49804/2/1328  | --                              | --        | --          | 0      | 0       | 0        | 0        | 0        | 0.31    | 0        | 0        | 0        | 48.78   | 119.87  | 0       |
| 3-6.c13467/1/3144  | serine protease PCS-A [Pelop    | 23266416  | AAN10146.1  | 12.38  | 33.67   | 3.58     | 11.49    | 6.47     | 24.49   | 11.36    | 10.46    | 12.21    | 136.81  | 164.39  | 112.3   |
| 3-6.c14952/1/3047  | PREDICTED: myomegalin-li        | 297279729 | XP_00280177 | 1.86   | 5.15    | 4.73     | 2.37     | 5.93     | 12.22   | 4.91     | 4.49     | 4.33     | 0.9     | 1.1     | 1.24    |
| 3-6.c16868/1/3032  | myosin heavy chain, partial [I  | 4249701   | AAD13772.1  | 1.54   | 0.06    | 3.56     | 2.67     | 2.8      | 0       | 2.28     | 4.13     | 2.24     | 0.57    | 0.13    | 0.84    |
| 1-2.c1985/36/1470  | PREDICTED: 28S ribosomal        | 847132351 | XP_01281932 | 29.15  | 47.48   | 17.94    | 15.48    | 13.47    | 25.65   | 18.41    | 19.04    | 21.5     | 5.11    | 9.87    | 2.95    |
| 2-3.c12253/1/1913  | PREDICTED: serine/threonin      | 663259256 | XP_00849145 | 3.89   | 6.03    | 0        | 0.56     | 0.8      | 2.29    | 0.01     | 0.78     | 0        | 5.82    | 4.18    | 12.42   |
| 3-6.c13919/1/3394  | PREDICTED: myosin heavy         | 765166248 | XP_01149197 | 41.26  | 3.02    | 7.15     | 5.33     | 6.05     | 0       | 5.35     | 8.38     | 5.13     | 2.89    | 1.06    | 1.43    |
| 2-3.c43226/1/2634  | PREDICTED: talin-2 [Tinam       | 719733077 | XP_01021790 | 3.26   | 18.83   | 36.4     | 20.16    | 28.04    | 14.56   | 22.65    | 23.61    | 21.84    | 5.58    | 5.49    | 10.91   |
| 3-6.c18847/9/2929  | PREDICTED: titin-like [Alli     | 564226854 | XP_00625785 | 416.41 | 195.23  | 817.61   | 584.2    | 617.19   | 844.82  | 575.85   | 566.76   | 723.17   | 192.87  | 126.48  | 335.27  |
| 1-2.c43599/1/1472  | --                              | --        | --          | 40.59  | 55.34   | 21.5     | 30.76    | 16.08    | 25.57   | 27.06    | 16.75    | 49.21    | 16.15   | 2.13    | 2.51    |
| 3-6.c5778/1/4745   | myosin, heavy chain 4, skelet   | 47575800  | NP_00100124 | 1.88   | 0       | 3.1      | 3.39     | 2.22     | 0.08    | 3.07     | 3.23     | 2.81     | 0.74    | 0.6     | 0.9     |
| 3-6.c18857/2/4593  | myosin, heavy chain 4, skelet   | 47575800  | NP_00100124 | 2.88   | 0       | 4        | 3.34     | 3.52     | 0       | 2.44     | 4.21     | 3.1      | 0.95    | 0.52    | 1       |
| 2-3.c15367/1/2233  | --                              | --        | --          | 3.01   | 0.09    | 6.05     | 2.71     | 0.93     | 0.08    | 2.51     | 1.18     | 3.01     | 0       | 0       | 0.54    |
| 3-6.c4654/1/3909   | succinate dehydrogenase cytc    | 218847754 | NP_00113637 | 12.28  | 10.51   | 20.9     | 13.73    | 15.44    | 7.77    | 16.08    | 7.24     | 14.38    | 3.54    | 1.61    | 6.14    |
| 2-3.c48842/1/4288  | calsequestrin 1 (fast-twitch, s | 148231736 | NP_00108022 | 248.5  | 35.13   | 319.37   | 322.99   | 425.54   | 396.31  | 423.82   | 467.64   | 351.53   | 199.48  | 153.5   | 117.63  |
| 1-2.c11973/1/1605  | --                              | --        | --          | 0      | 0.72    | 0.21     | 1.01     | 1.53     | 8.73    | 0.16     | 2.43     | 4.51     | 0       | 0       | 0       |
| 2-3.c22693/1/2530  | --                              | --        | --          | 119.57 | 8.43    | 89.4     | 61.59    | 42.4     | 18.19   | 43.41    | 54.57    | 69.57    | 18.89   | 33.63   | 10.9    |
| 2-3.c19016/2/2318  | --                              | --        | --          | 0.77   | 22.02   | 1.46     | 3.09     | 0.92     | 7.9     | 3.61     | 1.58     | 3.91     | 41.76   | 77.3    | 31.98   |
| 2-3.c32849/1/11549 | --                              | --        | --          | 27     | 5.22    | 52.2     | 128.65   | 29.96    | 23.97   | 113.42   | 73.82    | 103.64   | 35.84   | 23.08   | 36.16   |
| 3-6.c10073/1/3198  | PREDICTED: laminin subun        | 301607003 | XP_00293310 | 27.84  | 17.85   | 20.32    | 8.52     | 21.18    | 14.09   | 15.26    | 16.72    | 21.92    | 5.05    | 5.83    | 6.98    |
| 1-2.c25815/1/1333  | --                              | --        | --          | 7.38   | 36      | 4.79     | 9.65     | 7.47     | 12.32   | 10.62    | 7.79     | 9.59     | 121.33  | 98.76   | 108.66  |



|                    |                                 |           |             |        |         |         |        |         |         |        |         |        |        |        |        |
|--------------------|---------------------------------|-----------|-------------|--------|---------|---------|--------|---------|---------|--------|---------|--------|--------|--------|--------|
| 2-3.c55553/1/2548. | dual specificity mitogen-activ  | 56118586  | NP_00100805 | 0      | 0       | 0       | 5.36   | 0       | 0       | 5.29   | 4.95    | 4.11   | 1.41   | 1.27   | 0      |
| 1-2.c23401/1/5855. | malate dehydrogenase, cytopl    | 148223868 | NP_00108333 | 64.58  | 46.52   | 55.78   | 42.64  | 75.53   | 84.1    | 46.92  | 67.64   | 66.44  | 21.31  | 7.57   | 28.16  |
| 2-3.c43652/1/2096  | --                              | --        | --          | 3.12   | 48.03   | 1.52    | 1.77   | 2.48    | 17.05   | 5.35   | 3.74    | 3.8    | 36.27  | 54.25  | 56.01  |
| 3-6.c10137/1/3017  | transforming acidic coiled-co   | 148235419 | NP_00108196 | 0      | 0.26    | 1.63    | 0.88   | 5.95    | 5.55    | 4.1    | 3.4     | 3.36   | 0      | 2.73   | 0      |
| 2-3.c61198/3/2604  | PREDICTED: protein PRRC:        | 512859823 | XP_00294134 | 34.42  | 43.87   | 48.34   | 45.99  | 19.32   | 13.13   | 28.64  | 42.84   | 49.58  | 14.32  | 11.43  | 16.67  |
| 1-2.c11933/1/1564  | --                              | --        | --          | 5.45   | 1.34    | 7.11    | 3.27   | 3.94    | 1       | 2.25   | 5.69    | 3.77   | 0.64   | 0.36   | 0.46   |
| 2-3.c28219/1/2543  | myosin, heavy chain 4, skelet   | 47575800  | NP_00100124 | 752.54 | 24.16   | 1582.73 | 867.35 | 1229.02 | 6.31    | 759.32 | 1914.36 | 1079.6 | 160.16 | 101.44 | 285.79 |
| 2-3.c31633/218/220 | solute carrier family 16 (mon   | 148232306 | NP_00108030 | 122.62 | 13.08   | 55.81   | 258.74 | 174.23  | 16.97   | 144.8  | 74.82   | 180.14 | 39.11  | 28.71  | 67.94  |
| 2-3.c12268/1/6515. | calsequestrin-1 precursor [Xe   | 45360503  | NP_988894.1 | 27.45  | 4.6     | 71.34   | 18.67  | 63.32   | 59.94   | 34.83  | 57.11   | 31.01  | 11.76  | 10.35  | 13.44  |
| 2-3.c6735/1/2573.1 | --                              | --        | --          | 28.56  | 25.8    | 14.76   | 15.45  | 9.82    | 12.88   | 27.53  | 17.14   | 13.06  | 6.06   | 5.98   | 5.25   |
| 1-2.c38610/1/3837. | PREDICTED: NADH dehydi          | 847118057 | XP_01281647 | 281.77 | 90.18   | 183.55  | 202.8  | 200.5   | 129.47  | 152.58 | 192.29  | 200.66 | 46.5   | 69.88  | 82.37  |
| 1-2.c14792/1/1198  | mesoderm-specific transcript    | 54262191  | NP_00100578 | 2.78   | 1.65    | 2.94    | 2.18   | 5.37    | 4.14    | 4.11   | 4.99    | 3.43   | 0      | 1.2    | 0      |
| 1-2.c52378/3/1323  | PREDICTED: myosin-4-like        | 847172870 | XP_01280964 | 2.05   | 177.95  | 2.24    | 6.04   | 4.33    | 1146.28 | 4.46   | 6.86    | 2.87   | 0.47   | 0.94   | 0.5    |
| 2-3.c6101/1/2670   | PREDICTED: mitogen-activ        | 847103308 | XP_01281312 | 0      | 0.75    | 0       | 0.23   | 0       | 0.94    | 0.05   | 0.05    | 0      | 2.63   | 3.1    | 1.96   |
| 2-3.c8673/1/2757.1 | --                              | --        | --          | 10.71  | 1.04    | 4.69    | 6.22   | 3.24    | 2.01    | 4.23   | 3.33    | 6.37   | 0      | 1.2    | 1.7    |
| 3-6.c8630/1/2912   | eukaryotic translation initiati | 148232020 | NP_00108075 | 19.52  | 2.34    | 6.38    | 8.19   | 10.82   | 1.23    | 12.75  | 8.37    | 7.48   | 2      | 2.54   | 3.75   |
| 3-6.c11310/1/3133  | PREDICTED: caveolin-2-lik       | 301611463 | XP_00293525 | 1.23   | 13.74   | 14.96   | 1.71   | 4.98    | 30.04   | 3.2    | 1.74    | 3.54   | 0      | 0.57   | 0.9    |
| 1-2.c4011/6/1368   | --                              | --        | --          | 49.52  | 1394.44 | 126.9   | 111.01 | 73.89   | 786.52  | 96.53  | 82.86   | 163.24 | 65.49  | 32.85  | 24.59  |
| 1-2.c26347/1/1293  | --                              | --        | --          | 1.51   | 9.09    | 1.17    | 4.82   | 3.41    | 4.58    | 0      | 0       | 4.62   | 16.07  | 29.03  | 25.62  |
| 1-2.c19873/3/1329  | --                              | --        | --          | 0.09   | 0       | 0.57    | 0      | 0       | 2.84    | 0      | 0       | 10.34  | 13.77  | 0.14   | 0      |
| 2-3.c21899/1/1926  | PREDICTED: peptidyl-proly       | 742150246 | XP_01088046 | 3.48   | 0.43    | 5.65    | 4.4    | 3.59    | 5.99    | 8.43   | 5.08    | 7.4    | 2.11   | 0.72   | 1.76   |
| 2-3.c52553/1/2131. | PREDICTED: DNA-directed         | 589959545 | XP_00699235 | 50.75  | 21.06   | 50.99   | 37.78  | 34.9    | 35.05   | 19.8   | 30.92   | 45.35  | 11.01  | 12.75  | 8.89   |
| 1-2.c45720/1/1318  | --                              | --        | --          | 44.12  | 23.97   | 61.62   | 61.79  | 51.34   | 62.17   | 106.1  | 86.75   | 69.42  | 49.07  | 15.2   | 27.01  |
| 2-3.c15608/1/2363  | --                              | --        | --          | 9.53   | 0.46    | 6.54    | 7.46   | 7.3     | 0.89    | 5.72   | 3.05    | 3.83   | 0      | 0      | 2.04   |
| 2-3.c20705/7/1948  | phosphoglucomutase-1 [Xenc      | 47575814  | NP_00100125 | 21.97  | 36.24   | 13      | 12.53  | 322.16  | 73.22   | 264.73 | 349.61  | 15.56  | 6.68   | 0      | 2.18   |
| 2-3.c41102/1/2363  | --                              | --        | --          | 9.78   | 0.07    | 1.51    | 5.65   | 5.58    | 0       | 6.11   | 2.16    | 2.15   | 0.43   | 0.83   | 0.3    |
| 1-2.c29138/2/1426  | protein FAM134B [Xenopus        | 187608054 | NP_00112044 | 11.58  | 0.33    | 1.67    | 5.58   | 7.92    | 0.12    | 6.08   | 3       | 4.09   | 0.16   | 1.33   | 0.2    |
| 2-3.c56659/1/2309  | N-acetylglucosamine kinase [    | 207028218 | NP_00112865 | 2.78   | 0       | 5.02    | 6.55   | 1.37    | 0       | 0      | 1.76    | 2.25   | 0      | 0      | 0      |
| 2-3.c45841/1/1987  | --                              | --        | --          | 2.62   | 2.94    | 2.07    | 0.75   | 0       | 0.67    | 0.27   | 1.09    | 2.6    | 0      | 0      | 0      |
| 2-3.c55480/1/2251  | voltage dependent calcium ch    | 11414922  | BAB18553.1  | 3.38   | 10.61   | 36.15   | 36.15  | 43.51   | 46.44   | 41.05  | 33.24   | 34.49  | 13.56  | 12.57  | 11.93  |
| 2-3.c25443/3/2326  | --                              | --        | --          | 4.58   | 7.11    | 7.13    | 5.37   | 6.98    | 5.53    | 4.96   | 9.92    | 6.41   | 0      | 0.32   | 4.63   |
| 1-2.c49544/1/3724. | PREDICTED: actin, alpha ca      | 874446319 | XP_01295408 | 2.41   | 2.68    | 12.94   | 14.93  | 2.75    | 8.61    | 12.4   | 13.39   | 6.13   | 0.23   | 0.53   | 5.5    |
| 1-2.c6471/3/1383   | PREDICTED: solute carrier 1     | 847120590 | XP_00293828 | 4.79   | 5.88    | 5.17    | 4.41   | 3.91    | 13.04   | 7.9    | 6.78    | 6.03   | 1.42   | 1.7    | 0.81   |
| 2-3.c34043/1/2095. | PREDICTED: aldehyde oxid        | 847167054 | XP_00293776 | 2.29   | 1.97    | 1.07    | 2.32   | 5.93    | 1.78    | 3.18   | 4.96    | 0.32   | 31.24  | 48.4   | 97.09  |
| 2-3.c47134/1/2266  | PREDICTED: glycogen [stan       | 512855195 | XP_00293927 | 15.98  | 0.38    | 13.39   | 21.05  | 16.16   | 2.04    | 8.68   | 13.21   | 8.72   | 1.36   | 1.67   | 5.41   |
| 2-3.c28854/1/2246  | --                              | --        | --          | 11.85  | 16.72   | 7.9     | 10.57  | 32.86   | 2.6     | 26.63  | 5.69    | 14.48  | 2.19   | 2.49   | 0.98   |
| 2-3.c50338/1/1853  | --                              | --        | --          | 0.75   | 0.35    | 1.27    | 1.53   | 0       | 0       | 0.17   | 0       | 0.33   | 4.77   | 8.06   | 4.98   |
| 2-3.c40900/1/2240  | --                              | --        | --          | 1.13   | 7.9     | 0.76    | 0.51   | 0.85    | 2.07    | 1.72   | 0.54    | 0.89   | 19.24  | 12.36  | 13.05  |
| 1-2.c46929/2/1290  | phosphoglycerate kinase 1 [R    | 190701025 | AAG33069.2  | 204.55 | 23.16   | 61.11   | 202.78 | 181.97  | 71.64   | 240.94 | 257.91  | 216.33 | 129.23 | 91.08  | 53.11  |
| 2-3.c50698/2/2094  | --                              | --        | --          | 0      | 0       | 0       | 0      | 0       | 0.71    | 0      | 4.83    | 3.28   | 0      | 0      | 0      |
| 2-3.c57948/4/2591  | --                              | --        | --          | 24.59  | 2.52    | 61.86   | 63.09  | 71.93   | 37.14   | 60.71  | 30.73   | 71.49  | 17.52  | 7.35   | 29.19  |
| 1-2.c8286/1/1512.1 | --                              | --        | --          | 0      | 0       | 0       | 0.31   | 0       | 0       | 0      | 0       | 0      | 4.09   | 4.86   | 6.15   |
| 2-3.c47722/1/2319  | PREDICTED: myosin-4 [Xer        | 847156920 | XP_01282446 | 5.63   | 0.59    | 10.45   | 7.96   | 9.62    | 0       | 10.2   | 14.55   | 9.69   | 6.18   | 3.43   | 1.45   |
| 3-6.c10702/1/4698  | PREDICTED: LOW QUALI            | 697487074 | XP_00967463 | 230.08 | 102.37  | 462.24  | 327.84 | 366.54  | 510.11  | 340.01 | 349.61  | 445.54 | 122.18 | 78.73  | 208.91 |
| 3-6.c18147/1/2680. | PREDICTED: myosin-4 [Xer        | 847156920 | XP_01282446 | 62.98  | 0       | 396.07  | 220.42 | 397.37  | 0.64    | 195.11 | 170.81  | 86.95  | 33.56  | 16.44  | 94.33  |
| 1-2.c50791/2/1166  | --                              | --        | --          | 10.73  | 2.85    | 0.03    | 5.03   | 1.26    | 0       | 1.59   | 6.09    | 6.73   | 0      | 0      | 1.24   |
| 2-3.c6840/1/2164   | PREDICTED: pre-mRNA-sp          | 512835126 | XP_00293762 | 2.03   | 6.81    | 1.77    | 5.45   | 0       | 2.75    | 1.26   | 1.85    | 0.96   | 16.2   | 24.35  | 16.17  |
| 1-2.c7729/8/1536   | PREDICTED: ankyrin repeat       | 733897457 | XP_0107129C | 17.26  | 2.54    | 19.84   | 23.29  | 19.37   | 40.07   | 20.81  | 9.41    | 13.71  | 294.26 | 208.21 | 101.7  |
| 3-6.c18441/1/3652  | myosin, heavy chain 4, skelet   | 47575800  | NP_00100124 | 1.64   | 0       | 4.78    | 3.22   | 4.34    | 0       | 2.35   | 3.95    | 2.53   | 0.36   | 0.07   | 1.39   |
| 1-2.c17124/1/1453  | --                              | --        | --          | 1.77   | 1.74    | 0.34    | 7.55   | 4.7     | 5.93    | 3.7    | 8.53    | 0.34   | 0.29   | 2.15   | 0      |
| 2-3.c46113/1/1953. | --                              | --        | --          | 1.62   | 31.58   | 0.99    | 2.9    | 0.85    | 5       | 1.95   | 1.45    | 2.14   | 26.84  | 52.6   | 21.75  |
| 2-3.c17674/1/2363. | delta-1-pyrroline-5-carboxyla   | 156717284 | NP_00109618 | 7.69   | 10.58   | 8.16    | 5.43   | 5.14    | 5.69    | 6.56   | 3.92    | 5.62   | 1.25   | 0.23   | 1.43   |
| 2-3.c56279/1/4020. | PREDICTED: SH3 domain-c         | 847102032 | XP_01281293 | 1.7    | 0.47    | 7.28    | 1.4    | 3.41    | 2.43    | 3.21   | 1.31    | 5.54   | 0.32   | 0.71   | 0.27   |
| 2-3.c9907/1/2583.1 | --                              | --        | --          | 2.92   | 12.02   | 1.2     | 3.65   | 3.38    | 8.58    | 10.74  | 2.61    | 3.14   | 46.16  | 71.74  | 61.44  |
| 2-3.c55477/1/2355  | muscle creatine kinase [Xeno    | 147899942 | NP_00108007 | 5.66   | 5.84    | 13.21   | 8.49   | 3.49    | 23.03   | 6.2    | 4.09    | 7.39   | 2.27   | 0      | 0.33   |
| 3-6.c9244/1/3049   | C-cadherin [Xenopus laevis]     | 3150273   | AAC16910.1  | 0.23   | 0       | 0.26    | 0.14   | 0.27    | 0       | 0      | 0       | 0      | 2.05   | 0.77   | 1.19   |
| 2-3.c26751/1/2371  | --                              | --        | --          | 6.13   | 24.26   | 1.92    | 3.6    | 5.05    | 9.44    | 3.6    | 4.06    | 3.25   | 46.08  | 24.31  | 51.32  |
| 2-3.c5673/1/2081   | topoisomerase (DNA) II alph     | 148222806 | NP_0010825C | 2.4    | 49.36   | 1.85    | 1.63   | 2.55    | 12.41   | 0.89   | 2.34    | 2.76   | 0.11   | 0.29   | 0.11   |

|                    |                                 |           |             |        |        |        |        |        |        |        |         |         |        |        |        |
|--------------------|---------------------------------|-----------|-------------|--------|--------|--------|--------|--------|--------|--------|---------|---------|--------|--------|--------|
| 2-3.c39984/1/4356  | Y-box-binding protein 3 [Xer    | 62751871  | NP_00101585 | 30.02  | 20.16  | 24.98  | 28.68  | 45.09  | 153.65 | 40.54  | 41.75   | 41.13   | 16.05  | 18.74  | 10.56  |
| 2-3.e19544/2/2433  | PREDICTED: neogenin isofo       | 847142486 | XP_01282166 | 0      | 2.19   | 0      | 0      | 2.97   | 0      | 0.06   | 1.99    | 2.36    | 0.02   | 0      | 0      |
| 1-2.c3728/1/1533   | ectonucleoside triphosphate d   | 147898505 | NP_00108573 | 0.19   | 3.89   | 0.56   | 1.65   | 2.25   | 3.88   | 1.73   | 1       | 1.11    | 16.82  | 21.07  | 20.47  |
| 1-2.c8915/23/1694  | PREDICTED: glutaryl-CoA c       | 847170161 | XP_01280861 | 77.22  | 58.07  | 81.86  | 98.13  | 67.22  | 51.66  | 68.76  | 45.77   | 89.2    | 14.43  | 21.44  | 34.05  |
| 2-3.e59324/1/2606  | PREDICTED: ankyrin repeat       | 301608278 | XP_00293370 | 2.12   | 0      | 0.72   | 0      | 0      | 0      | 0      | 1.54    | 1.58    | 0      | 0      | 0      |
| 1-2.c35951/2/1435  | --                              | --        | --          | 0      | 0      | 0.1    | 0      | 0.28   | 5.57   | 0.57   | 0       | 0.99    | 9.52   | 17.28  | 8.06   |
| 1-2.e28127/1/1346  | PREDICTED: cortactin-bindi      | 847114286 | XP_00491304 | 4.14   | 1.5    | 0.98   | 3.55   | 5.71   | 2.8    | 1.95   | 1.36    | 3.07    | 23.22  | 24.21  | 39.93  |
| 3-6.e18049/1/3361  | PREDICTED: ralBP1-associ        | 395535050 | XP_00376954 | 7.94   | 2.31   | 0.56   | 0.72   | 0      | 0      | 3.24   | 1.14    | 3.24    | 1.42   | 0      | 0      |
| 1-2.c22941/1/1350  | --                              | --        | --          | 3.33   | 2.35   | 1.14   | 3.91   | 1.21   | 1.14   | 1.21   | 2.36    | 1.47    | 24.14  | 30.17  | 22.14  |
| 1-2.c39356/1/4357  | keratin, type I cytoskeletal 19 | 485049501 | NP_990340.2 | 566.47 | 127.21 | 496.9  | 712.09 | 332.9  | 140.69 | 660.95 | 632.65  | 620     | 376.84 | 216.37 | 144.56 |
| 2-3.e21231/1/2380  | eukaryotic peptide chain rele   | 349585151 | NP_00101580 | 0.19   | 0.84   | 0.16   | 0.09   | 0.47   | 0.78   | 2.81   | 2.79    | 2.57    | 0.38   | 0.62   | 0.29   |
| 1-2.c45258/1/1396  | PREDICTED: dnaJ homolog         | 557275761 | XP_00602105 | 0      | 0      | 1.3    | 0.77   | 1.71   | 1.77   | 0      | 0       | 0       | 3.25   | 0.94   | 5.68   |
| 1-2.c14386/1/1617  | PREDICTED: F-actin-cappin       | 426227627 | XP_00400791 | 27.67  | 92.74  | 39.66  | 30.23  | 49.63  | 92.34  | 56.52  | 90.78   | 116.7   | 23.05  | 21.98  | 48.71  |
| 2-3.e26373/2/2383  | PREDICTED: paraplegin [Xc       | 301608280 | XP_00293370 | 45.82  | 11.28  | 15.17  | 9.31   | 14.34  | 5.64   | 13.66  | 23.73   | 27.71   | 8.05   | 6.07   | 8.26   |
| 2-3.e52177/1/6339  | myosin heavy chain, partial [I  | 4249697   | AAD13770.1  | 0.76   | 0      | 3.96   | 4.63   | 1.56   | 0      | 2.21   | 3.62    | 3.74    | 1.56   | 0      | 0      |
| 3-6.e16507/1/3416  | PREDICTED: myosin-4 [Xer        | 847156920 | XP_01282446 | 3.27   | 0      | 3.63   | 3.67   | 2.73   | 0      | 2.86   | 7.3     | 4.68    | 1.11   | 1.19   | 0.86   |
| 2-3.e7669/1/2100.1 | ATP synthase subunit gamma      | 226371866 | ACOS1558.1  | 710.34 | 356.86 | 570.96 | 508.06 | 599.01 | 403.84 | 485.82 | 510.57  | 535.83  | 195.38 | 174.63 | 205.01 |
| 1-2.e44451/1/1218  | bromodomain-containing pro      | 148230679 | NP_00108255 | 0      | 5.14   | 0      | 0      | 0      | 3.57   | 2.8    | 0.95    | 1.94    | 0      | 0      | 0      |
| 1-2.c43157/1/3783  | PREDICTED: actin, alpha ca      | 803091489 | XP_00401102 | 1.01   | 0.61   | 5.27   | 5.46   | 1.95   | 3.66   | 3.47   | 4.81    | 2.77    | 0.64   | 1      | 0.95   |
| 2-3.e4995/2/1739   | bone morphogenetic protein 7    | 147900035 | NP_00108086 | 2.22   | 11.21  | 3.71   | 3.99   | 0      | 0.25   | 1.93   | 1.18    | 0       | 17.72  | 12.08  | 17.39  |
| 1-2.c43207/1/6288  | PREDICTED: endoplasmic r        | 817323826 | XP_01233262 | 8.25   | 16.48  | 2.44   | 15.6   | 1.83   | 17.24  | 11.33  | 4.51    | 5.27    | 110.13 | 113.73 | 61.05  |
| 1-2.c1327/1/471569 | NADH dehydrogenase (ubiq        | 148225797 | NP_00108982 | 323.98 | 195.67 | 298.89 | 350.38 | 304.93 | 178.82 | 262.5  | 299.88  | 289.82  | 78     | 142.6  | 110.46 |
| 2-3.e9247/1/2402.1 | PREDICTED: synaptotagmin        | 847099495 | XP_01281226 | 4.95   | 3.33   | 13.86  | 2.69   | 13.43  | 1.67   | 13.7   | 7.76    | 2.59    | 0      | 1.61   | 0.82   |
| 1-2.c4228/6/1678   | uncharacterized protein LOC     | 148235485 | NP_00108971 | 4.83   | 0      | 5.18   | 3.16   | 3.17   | 1.37   | 3.07   | 5.36    | 2.54    | 0.54   | 0      | 0.74   |
| 2-3.c61115/1/2424  | hypothetical protein A306_06    | 449277216 | EMC85474.1  | 0.6    | 27.47  | 7.76   | 14.85  | 3.04   | 1.89   | 3.15   | 1.86    | 2.57    | 51.78  | 56.5   | 22.51  |
| 3-6.e4364/1/3186   | alpha1 type II collagen [Cync   | 5360532   | BAA82043.1  | 0.96   | 48.53  | 8.14   | 3      | 0.59   | 15.53  | 3.95   | 5.53    | 1.98    | 1      | 0      | 1.03   |
| 1-2.c12928/1/1320  | --                              | --        | --          | 0      | 0      | 0      | 0      | 0      | 0.68   | 0      | 0       | 0       | 10.85  | 15.43  | 0      |
| 3-6.e16843/1/3371  | myosin, heavy chain 4, skelet   | 47575800  | NP_00100124 | 2.03   | 0.11   | 4.27   | 2.78   | 2.24   | 0      | 1.54   | 3.92    | 3.15    | 0.43   | 0.6    | 0.82   |
| 1-2.e19321/1/5450  | larval type I keratin [Rana cat | 134140868 | ABO61147.1  | 31.3   | 4.7    | 9.45   | 12.04  | 10.87  | 0.86   | 9.89   | 9.57    | 5.56    | 1.78   | 0.8    | 1.54   |
| 2-3.c30940/1/1947  | --                              | --        | --          | 8.17   | 376.34 | 13.56  | 10.45  | 5.54   | 301.26 | 5.1    | 11.58   | 13.58   | 2.94   | 3.28   | 2.63   |
| 2-3.c17104/1/2122  | myosin heavy chain, partial [I  | 4249701   | AAD13772.1  | 3.05   | 0.51   | 3.69   | 2.36   | 3.11   | 0.1    | 2.86   | 2.89    | 2.86    | 0.37   | 0      | 0.11   |
| 2-3.c43395/2/2569  | PREDICTED: eukaryotic elo       | 847162478 | XP_01282552 | 2.6    | 6.48   | 5.42   | 20.39  | 6.74   | 5.57   | 3.63   | 7.44    | 8.48    | 0.43   | 0.46   | 3.94   |
| 1-2.e26129/1/1279  | --                              | --        | --          | 39.65  | 3.03   | 4.41   | 56.13  | 11.85  | 4.33   | 38.2   | 13.92   | 19.54   | 7.03   | 8.16   | 6.46   |
| 2-3.c33048/1/2158  | ubiquitin-conjugating enzyme    | 1381181   | AAB02656.1  | 0      | 0      | 0      | 1.57   | 0      | 0      | 0      | 0       | 0       | 7.22   | 11.52  | 0.01   |
| 2-3.e27487/1/2534  | solute carrier family 38, mem   | 58332320  | NP_00101105 | 7.05   | 4.1    | 7.06   | 3.96   | 4.58   | 5.3    | 3.07   | 4.46    | 5.08    | 0.91   | 0      | 1.62   |
| 2-3.e6071/1/4163   | PREDICTED: myosin-4 [Xer        | 847156920 | XP_01282446 | 15.88  | 0.72   | 29.55  | 27.13  | 25.26  | 0      | 16.07  | 31.4    | 19.7    | 9.58   | 6.37   | 7.62   |
| 2-3.c13322/2/2569  | vacuole membrane protein 1      | 56118368  | NP_00100787 | 4.43   | 3.01   | 1.49   | 9.08   | 2.6    | 0      | 5.49   | 2.4     | 4.53    | 1.23   | 0      | 1.24   |
| 2-3.e55678/1/2219  | --                              | --        | --          | 1.7    | 5.15   | 1.62   | 2.79   | 1.49   | 2.15   | 3.42   | 1.3     | 1.76    | 34.69  | 60.59  | 28.27  |
| 2-3.c36881/1/2214  | --                              | --        | --          | 42.66  | 0.62   | 4.64   | 19.45  | 13.44  | 0.29   | 3.22   | 8.7     | 13.69   | 0.3    | 1.95   | 1.3    |
| 1-2.e29389/1/1381  | PREDICTED: protein kinase       | 699699565 | XP_00990692 | 2.63   | 29.57  | 4.82   | 4.44   | 0      | 0      | 1.7    | 0       | 3.61    | 30.7   | 23.99  | 18.78  |
| 1-2.e26034/2/1285  | Nucleophosmin [Rana catesb      | 226372338 | ACOS1794.1  | 119.51 | 308.82 | 68.82  | 66.11  | 58.59  | 98.62  | 62.66  | 64.97   | 61.55   | 17.7   | 23.36  | 26.39  |
| 1-2.e41445/1/1900  | --                              | --        | --          | 4.08   | 4.67   | 0      | 1.95   | 2.59   | 1.97   | 1.46   | 0       | 0.33    | 12.45  | 20.66  | 9.58   |
| 1-2.e47447/2/1379  | sodium channel subunit beta-    | 58332472  | NP_00101131 | 0.5    | 0      | 3.44   | 1.15   | 2.02   | 0.74   | 2.4    | 0.88    | 1.75    | 0      | 0      | 0      |
| 2-3.e5429/1/1976   | --                              | --        | --          | 0      | 4.99   | 0      | 0.3    | 0      | 0      | 0      | 0       | 0       | 6.11   | 0      | 10.27  |
| 2-3.e9582/1/2637   | glutamate dehydrogenase 1, r    | 58331978  | NP_00101113 | 61.58  | 59.15  | 41.98  | 26.02  | 48.51  | 33.93  | 38.84  | 40.03   | 24.86   | 9.51   | 0      | 25.07  |
| 1-2.c34055/1/1363  | PREDICTED: ectonucleotide       | 847130990 | XP_01281912 | 1.35   | 7.93   | 0.49   | 1.03   | 0.73   | 2.05   | 0.42   | 0.75    | 0.33    | 16.05  | 15.81  | 15.07  |
| 1-2.e44648/1/1545  | --                              | --        | --          | 1.13   | 3.75   | 0.16   | 1.21   | 0.51   | 2.1    | 0      | 0.35    | 0.51    | 19.06  | 21.23  | 3.71   |
| 2-3.e63371/4/2142  | PREDICTED: fibronectin iso      | 768383139 | XP_01158925 | 3.13   | 11.87  | 3.36   | 2.01   | 2.15   | 4.1    | 2.85   | 2.34    | 2.38    | 22.41  | 21.25  | 43.15  |
| 2-3.c4018/2/2373.1 | PREDICTED: LOW QUALI            | 847136111 | XP_01282043 | 4.45   | 5.77   | 5.01   | 5.6    | 4.62   | 3.6    | 7.86   | 2.81    | 4.89    | 41     | 60.4   | 65.1   |
| 2-3.e61208/7/2271  | myosin, heavy chain 4, skelet   | 47575800  | NP_00100124 | 842.85 | 7.97   | 0.06   | 5.16   | 0.07   | 3.69   | 0      | 1790.41 | 1021.46 | 0      | 16.89  | 0      |
| 3-6.e8023/1/3947   | phosphofructokinase, muscle     | 148224874 | NP_00108692 | 1.88   | 0      | 0.85   | 0      | 1.98   | 0      | 0      | 0.9     | 1.41    | 0      | 0      | 0      |
| 1-2.c1881/1/1666   | SPRY domain-containing SO       | 148224848 | NP_00108883 | 0      | 0      | 9.35   | 0      | 6.39   | 4.55   | 9.41   | 6.44    | 8.18    | 2.82   | 3.56   | 0      |
| 1-2.e11248/1/1530  | --                              | --        | --          | 0      | 47.71  | 2.02   | 7.82   | 1.58   | 10.62  | 7.3    | 1       | 0       | 99.74  | 242.7  | 74.12  |
| 1-2.e45163/1/949   | voltage dependent calcium ch    | 11414934  | BAB18559.1  | 96.27  | 134.76 | 105.86 | 34.36  | 61.03  | 181.94 | 44.62  | 39.2    | 41.5    | 6.88   | 20.09  | 13.91  |
| 1-2.c33078/1/1583  | --                              | --        | --          | 6.98   | 8.28   | 0      | 4.73   | 2.61   | 0      | 0      | 0.41    | 0.22    | 12     | 4.58   | 5.12   |
| 1-2.e40819/1/1483  | --                              | --        | --          | 22     | 17.67  | 37.53  | 13.28  | 17.03  | 1.92   | 24.71  | 12.18   | 28.36   | 4.78   | 2.24   | 2.45   |
| 3-6.c13599/1/2904  | PREDICTED: endothelin-cor       | 669276853 | XP_00863068 | 10.71  | 30.42  | 9.66   | 18.45  | 4.41   | 12.34  | 16.84  | 11.39   | 12.58   | 129.16 | 158.19 | 133.19 |
| 1-2.c40990/1/1483  | --                              | --        | --          | 61.88  | 24.68  | 68.93  | 64.91  | 89.11  | 17.89  | 122.07 | 115.6   | 164.07  | 57.89  | 46.91  | 46.66  |

|                    |                                 |           |             |          |         |          |         |          |         |          |          |          |         |         |         |
|--------------------|---------------------------------|-----------|-------------|----------|---------|----------|---------|----------|---------|----------|----------|----------|---------|---------|---------|
| 3-6.c10316/1/3600  | myosin, heavy chain 4, skelet   | 47575800  | NP_00100124 | 0.16     | 0.14    | 1.63     | 0.74    | 0.41     | 0.09    | 1.86     | 0.29     | 0.83     | 0       | 0       | 0.07    |
| 2-3.e13468/1/1885  | --                              | --        | --          | 4.83     | 0       | 4.37     | 0.11    | 21.43    | 148.33  | 11.93    | 4.54     | 5.51     | 3.74    | 1.65    | 0       |
| 3-6.e13706/1/3455  | alpha 1 type I collagen [Rana   | 3242649   | BAA29028.1  | 10.58    | 289.66  | 33.57    | 18.67   | 17.76    | 365.16  | 25.14    | 17.69    | 32.96    | 13.07   | 5.64    | 8.4     |
| 1-2.c30688/1/1582  | PREDICTED: DBH-like mor         | 512842438 | XP_00293636 | 4.94     | 2.41    | 2.25     | 4.14    | 3.73     | 2.43    | 3.17     | 3.78     | 1.29     | 31.84   | 39.41   | 33.12   |
| 1-2.c39644/1/1321  | --                              | --        | --          | 1.35     | 0       | 1.01     | 4.62    | 0        | 0       | 2.42     | 1.17     | 0        | 17.69   | 40.26   | 17.79   |
| 2-3.e12071/1/2342  | --                              | --        | --          | 2.02     | 24.57   | 2.6      | 2.87    | 1.72     | 3.18    | 3        | 0.65     | 3.61     | 28.24   | 47.13   | 26.81   |
| 2-3.c26498/1/1913  | transgelin-2 [Bufo gargarizan   | 635377487 | AHZ89387.1  | 5.59     | 6.93    | 3.45     | 5.08    | 5.35     | 0.81    | 7.91     | 0.8      | 3.64     | 39.86   | 54.57   | 37.14   |
| 2-3.c59597/1/2079  | --                              | --        | --          | 189.49   | 4.64    | 60.97    | 66.87   | 124.19   | 2.89    | 50.01    | 122.11   | 94.61    | 35      | 23.81   | 22.89   |
| 1-2.c26093/1/1332  | inner-ear cyokeratin [Rana c    | 6980088   | AAF34720.1  | 31.41    | 0.42    | 38.95    | 52.98   | 35.29    | 3.13    | 41.86    | 48.49    | 59.49    | 29.04   | 22.8    | 5.24    |
| 1-2.c49159/1/1781  | --                              | --        | --          | 60.61    | 46.94   | 45.13    | 58.13   | 50.25    | 58.34   | 50.96    | 40.21    | 59.68    | 18.66   | 11.31   | 23.08   |
| 3-6.e9894/1/3570   | myosin heavy chain, partial [I  | 4249697   | AAD13770.1  | 1.16     | 0       | 2.02     | 1.79    | 1.12     | 0       | 1.41     | 1.47     | 1.26     | 0.11    | 0.07    | 0.29    |
| 2-3.c53927/1/1976  | sestrin-1 [Xenopus (Silurana)   | 194018650 | NP_00112341 | 31.62    | 2.24    | 6.94     | 24.94   | 21.54    | 1.91    | 42.4     | 37.98    | 31.14    | 1.8     | 6.81    | 27.19   |
| 1-2.c16545/2/1344  | --                              | --        | --          | 1.11     | 11.81   | 0.56     | 1.15    | 0.26     | 3.54    | 0.79     | 0.99     | 0.69     | 10.78   | 19.99   | 15.69   |
| 2-3.e12698/1/2305  | --                              | --        | --          | 0        | 6.9     | 0.37     | 0       | 0        | 1.21    | 0.36     | 0        | 0        | 3.89    | 13.23   | 5.55    |
| 2-3.c54921/1/2055  | dehydrogenase/reductase SDI     | 166158027 | NP_00110742 | 13.38    | 10.96   | 19.02    | 12.9    | 16.28    | 25.87   | 25.89    | 10.3     | 24.34    | 5.69    | 5.4     | 8.29    |
| 1-2.c20943/32/1682 | PREDICTED: medium-chain         | 224058541 | XP_00218952 | 86.36    | 50.41   | 75.45    | 46.85   | 101.03   | 48.3    | 73.31    | 79.05    | 87.74    | 21.41   | 36.57   | 33.12   |
| 3-6.c4577/2/2844.2 | PREDICTED: talin-2 isoform      | 557294565 | XP_00602972 | 21.42    | 11.08   | 24.22    | 18.31   | 17.08    | 18.33   | 16.98    | 16.69    | 18.89    | 5.05    | 1.04    | 6.59    |
| 1-2.c49223/1/1373  | PREDICTED: nucleolar prot       | 556975779 | XP_00599546 | 31.13    | 83.43   | 15.05    | 32.43   | 18.68    | 36.86   | 41.31    | 27.41    | 23.77    | 10.19   | 16.21   | 6.11    |
| 1-2.c12162/1/1582  | actin, alpha cardiac muscle 2   | 45361557  | NP_989355.1 | 218.03   | 46.4    | 402.78   | 294.84  | 325.8    | 445.45  | 295.56   | 360.33   | 370.48   | 142.47  | 87.59   | 161.68  |
| 2-3.c37034/1/2383  | cadherin-13 precursor [Xenop    | 156718012 | NP_00109654 | 3.26     | 5.02    | 5.1      | 2.39    | 5.29     | 5.68    | 3.69     | 4.19     | 6.89     | 1.56    | 0.19    | 1.39    |
| 2-3.c55977/1/2165  | MGC82982 protein [Xenopus       | 148236271 | NP_00108598 | 2.12     | 13.46   | 1.1      | 2.65    | 1.68     | 4.26    | 1.69     | 1.54     | 2.16     | 23.6    | 32.2    | 19.83   |
| 2-3.c7346/1/2652.1 | PREDICTED: solute carrier 1     | 301613957 | XP_00293647 | 0.81     | 0.36    | 0.45     | 0.2     | 0.35     | 0.48    | 0        | 0.36     | 0.34     | 4.65    | 3.34    | 10.12   |
| 2-3.e19149/10/2416 | cirrhin [Xenopus (Silurana) tr  | 113931428 | NP_00103916 | 3.95     | 5.4     | 1.06     | 0.08    | 0.14     | 0.35    | 1.15     | 1.56     | 2.29     | 0.19    | 0.31    | 0       |
| 3-6.e18773/1/3218  | PREDICTED: myosin-4 [Xer        | 847156920 | XP_01282446 | 3.85     | 0       | 6.26     | 4.34    | 4.44     | 0       | 2.72     | 5.59     | 3.88     | 1.81    | 0.72    | 0.75    |
| 2-3.c10416/1/2538  | --                              | --        | --          | 9.93     | 9.61    | 14.94    | 9.75    | 12.38    | 16.08   | 11.95    | 9.13     | 12.68    | 4.28    | 1.49    | 4.48    |
| 1-2.e19686/1/1354  | tyrosine 3-monooxygenase/tr     | 148224700 | NP_00108640 | 0        | 0       | 0        | 0.19    | 0        | 0       | 0        | 0        | 0        | 8.87    | 11.77   | 0       |
| 2-3.c32729/1/2033  | PREDICTED: arf-GAP with         | 641793969 | XP_00817812 | 0        | 7.26    | 3.31     | 1.42    | 0.18     | 0.42    | 0        | 0        | 0        | 5.86    | 0       | 10.3    |
| 1-2.c20264/1/1615  | rab-like protein 3 [Xenopus (   | 156717510 | NP_00109625 | 5.87     | 4.38    | 2.13     | 0.79    | 3.44     | 0.3     | 0.31     | 2.44     | 2.68     | 0       | 0       | 0.19    |
| 2-3.e16061/1/2182  | calsequestrin 1 (fast-twitch, s | 148231736 | NP_00108022 | 14.21    | 1.82    | 24.86    | 22.54   | 27.72    | 30.97   | 31.54    | 32.77    | 31.39    | 16.21   | 11.05   | 8.42    |
| 1-2.c32995/1/2922  | glyceraldehyde-3-phosphate c    | 300679438 | ADK27487.1  | 25267.62 | 1406.63 | 18300.74 | 27490.3 | 27987.01 | 3711.51 | 23168.97 | 21521.97 | 29375.34 | 9611.21 | 9644.47 | 9901.33 |
| 1-2.c26301/1/1840  | PREDICTED: myosin-4 [Xer        | 847156920 | XP_01282446 | 0        | 0       | 131.94   | 249.42  | 286.72   | 0       | 21.44    | 6.3      | 0        | 100.08  | 48.56   | 118.99  |
| 2-3.e15207/1/2631  | kelch-like protein 40 [Xenop    | 147902760 | NP_00109046 | 1.23     | 0       | 0        | 0.02    | 1.42     | 18.14   | 0        | 0        | 0        | 0       | 6.59    | 4.6     |
| 1-2.c26001/1/1351  | --                              | --        | --          | 8.54     | 16.83   | 5.31     | 9.18    | 5.72     | 7.04    | 12.61    | 5.16     | 5.58     | 72.93   | 89.66   | 80.36   |
| 2-3.c50353/1/1729  | Unknown (protein for MGC:       | 80477042  | AAI08785.1  | 16.87    | 33.27   | 11.3     | 8.41    | 10.77    | 47.31   | 14.7     | 13.61    | 12.87    | 2.98    | 1.45    | 7.2     |
| 2-3.c47933/1/2328  | --                              | --        | --          | 5.33     | 5.18    | 0.5      | 5.78    | 2.26     | 2.08    | 1.32     | 1.54     | 0.91     | 16.75   | 17.78   | 15.61   |
| 2-3.c61788/1/2164  | calsequestrin 1 (fast-twitch, s | 148231736 | NP_00108022 | 3.39     | 0.93    | 8.5      | 5.54    | 8.29     | 8.43    | 4.58     | 7.45     | 6.54     | 1.86    | 1.07    | 1.85    |
| 2-3.c47381/1/2109  | unnamed protein product [On     | 641929461 | CDR19102.1  | 5.89     | 22.68   | 2.35     | 3.98    | 4.3      | 11.59   | 2.8      | 3.95     | 6.33     | 47.54   | 59.79   | 35.7    |
| 1-2.e4121/1/1332   | --                              | --        | --          | 1.74     | 3.34    | 0.07     | 1.75    | 0        | 0.56    | 0        | 0.69     | 0.5      | 8.99    | 11.48   | 11.62   |
| 1-2.c34076/1/8436  | PREDICTED: elongation fac       | 543731520 | XP_00550680 | 3144     | 6000.08 | 2846.39  | 2178.68 | 2477.28  | 3895.67 | 2085.38  | 2107.33  | 2775     | 879.12  | 537.03  | 1221.47 |
| 2-3.c54334/1/2805  | myozenin-3 [Xenopus (Silura     | 58332250  | NP_00101127 | 1.97     | 17.3    | 12.24    | 2.52    | 4.85     | 102.55  | 4.05     | 2.09     | 2.58     | 0       | 0.17    | 1.28    |
| 2-3.e10302/1/2178  | --                              | --        | --          | 4.98     | 47.09   | 2.44     | 4.23    | 3        | 7.86    | 3.7      | 2.57     | 7.18     | 55.19   | 81.82   | 36.39   |
| 2-3.c53355/1/1810  | PREDICTED: calreticulin [A      | 557281027 | XP_00602348 | 157.45   | 143.68  | 150.15   | 63.58   | 169.73   | 45.55   | 130.31   | 101.27   | 27.51    | 25.29   | 1.41    | 9.98    |
| 2-3.c47479/1/2159  | --                              | --        | --          | 41.93    | 33.56   | 33.07    | 107.14  | 66.43    | 128.25  | 145.35   | 98.38    | 120.3    | 66.45   | 48.09   | 26.12   |
| 2-3.c52396/1/2150  | PREDICTED: myosin-4 [Xer        | 847156920 | XP_01282446 | 741.86   | 0.36    | 804.14   | 700.14  | 436.35   | 16.39   | 0        | 2.41     | 28.49    | 250.76  | 99.58   | 129.67  |
| 1-2.e17867/1/1078  | PREDICTED: keratin, type II     | 602673215 | XP_00744212 | 35.48    | 52.37   | 34.96    | 18.69   | 22.78    | 47.81   | 22.09    | 37.58    | 32.29    | 27.54   | 1.25    | 1.78    |
| 1-2.c2767/10/1803  | Map2k3 protein [Xenopus lac     | 50604142  | AAH77760.1  | 31.8     | 52.27   | 56.55    | 26.4    | 47.67    | 58.1    | 38.06    | 37.57    | 27.8     | 18.86   | 9.44    | 9.5     |
| 1-2.c3323/1/1591.1 | envelope polyprotein [Chloro    | 80550713  | ABB52640.1  | 0.72     | 14.66   | 2.29     | 3.28    | 2.9      | 3.73    | 2.37     | 1.09     | 4.1      | 21.74   | 38.94   | 36.45   |
| 1-2.e5738/7/1372   | --                              | --        | --          | 3.14     | 3.49    | 7.48     | 5.98    | 1.21     | 2.38    | 8.76     | 6.04     | 1.07     | 0.11    | 0       | 0.72    |
| 2-3.c48283/1/2226  | PREDICTED: acetyl-coenzym       | 301616096 | XP_00293745 | 2.27     | 1.74    | 1.57     | 0       | 0.74     | 2.33    | 1.22     | 1.21     | 0.19     | 0       | 0       | 0       |
| 2-3.c53425/1/2653  | --                              | --        | --          | 0.41     | 1.93    | 0.8      | 2.28    | 0        | 4.05    | 1.88     | 0        | 1.39     | 18.01   | 9.52    | 12.29   |
| 2-3.c13656/1/2478  | --                              | --        | --          | 8.01     | 9.26    | 7.51     | 6.02    | 4.77     | 4.45    | 4.47     | 5.21     | 4.16     | 0.44    | 2.07    | 0.81    |
| 1-2.c37945/1/1560  | PREDICTED: protein Wnt-5:       | 512839216 | XP_00491423 | 0        | 9.28    | 0.52     | 1.89    | 0        | 0.53    | 0.33     | 0.26     | 0        | 6.38    | 8.4     | 12.65   |
| 2-3.e11611/4/2303  | PREDICTED: translational at     | 847168784 | XP_01280816 | 18.68    | 11.76   | 13.89    | 16.95   | 16.81    | 11.74   | 11.72    | 12.62    | 18.71    | 5.22    | 2.61    | 4.36    |
| 1-2.e18499/1/1483  | --                              | --        | --          | 3.68     | 0.69    | 8.13     | 6.35    | 6.07     | 1.28    | 4.74     | 2.29     | 7.88     | 1.79    | 0       | 0.41    |
| 2-3.c43276/1/2280  | ryanodine receptor alpha iso    | 538246    | BAA04646.1  | 65.02    | 24.96   | 72.4     | 51.49   | 59.52    | 87.61   | 52.7     | 60.68    | 68.54    | 24.67   | 26.55   | 20.36   |
| 2-3.c39151/1/2622  | PREDICTED: F-box only pr        | 847127821 | XP_01281845 | 2.87     | 0.46    | 0.54     | 3.32    | 4.22     | 0.59    | 12.04    | 6.45     | 3.26     | 1.22    | 1.05    | 1.87    |
| 2-3.e41770/1/3030  | myosin heavy chain, partial [I  | 4249697   | AAD13770.1  | 908.12   | 28.17   | 1711.88  | 1774    | 1478.63  | 6.52    | 1371.08  | 1830.98  | 978.14   | 789.65  | 462.83  | 478.02  |
| 2-3.c41009/1/2497  | --                              | --        | --          | 2.97     | 6.57    | 0.65     | 1.54    | 1.36     | 3.17    | 3.17     | 0.59     | 1.19     | 21.92   | 22.34   | 17.06   |

|                    |                               |           |             |         |        |         |         |         |         |         |         |         |        |        |        |
|--------------------|-------------------------------|-----------|-------------|---------|--------|---------|---------|---------|---------|---------|---------|---------|--------|--------|--------|
| 3-6.c15535/1/3720  | RecName: Full=Sarcoplasmic    | 9789732   | Q92105.1    | 2.15    | 0.42   | 2.98    | 1.96    | 2.39    | 1.58    | 2.41    | 2.68    | 3.75    | 0.4    | 0.69   | 1      |
| 2-3.c46043/1/2257  | --                            | --        | --          | 7.31    | 6.77   | 16.32   | 12.79   | 16.75   | 24.67   | 20.87   | 11.94   | 21.11   | 6.46   | 4.33   | 7.23   |
| 1-2.c29299/1/6568  | PREDICTED: elongation fac     | 573878959 | XP_00662770 | 1621.64 | 3008.1 | 1403.47 | 1430.43 | 1268.08 | 1906.68 | 1259.14 | 1269.07 | 1405.83 | 576.93 | 361.26 | 613.53 |
| 1-2.c16743/1/1269  | --                            | --        | --          | 128.58  | 8.13   | 20.18   | 38.25   | 50.89   | 21.44   | 46.68   | 71.46   | 41.96   | 21.27  | 31.14  | 10.97  |
| 2-3.c21884/4/2601  | alpha 1 type I collagen [Rana | 3242649   | BAA29028.1  | 6.63    | 219.04 | 20.6    | 16.89   | 15.98   | 149.44  | 18.73   | 12.79   | 24.19   | 9.53   | 6      | 4.48   |
| 2-3.c38731/2/2598  | uncharacterized protein LOC:  | 148226767 | NP_00108484 | 9.53    | 7.99   | 17.55   | 52.95   | 25.72   | 0       | 28.57   | 18.35   | 31.43   | 4.11   | 10.25  | 11.36  |
| 3-6.c13236/1/2824  | potassium channel tetrameriz  | 148232084 | NP_00108844 | 2.29    | 8.29   | 1.16    | 1.95    | 1.82    | 3.43    | 2.14    | 1.43    | 2.32    | 25.31  | 26.22  | 14.68  |
| 3-6.c18324/1/3082  | uncharacterized protein LOC:  | 148225843 | NP_00107985 | 0       | 0      | 0       | 0.97    | 0       | 0       | 0       | 0       | 4.52    | 6.36   | 1.98   |        |
| 2-3.c11480/9/2043  | Methionine-R-sulfoxide redu   | 431892020 | ELK02467.1  | 8.36    | 12.57  | 5.7     | 5.76    | 5.51    | 25.76   | 6.26    | 5.83    | 4.97    | 1.39   | 3.32   | 0      |
| 2-3.c61453/2/2316  | PREDICTED: splicing factor    | 847091403 | XP_01282544 | 0       | 0      | 8.08    | 5.4     | 0       | 3.85    | 2.44    | 3.77    | 7.63    | 0.24   | 1.85   | 0.73   |
| 2-3.c29278/1/2208  | --                            | --        | --          | 4.27    | 0.09   | 1.47    | 3.92    | 4.84    | 0.62    | 1.66    | 3.99    | 5.87    | 1.42   | 0.67   | 0.36   |
| 1-2.c44380/1/1354  | --                            | --        | --          | 19.21   | 22.67  | 27.18   | 43.4    | 18.29   | 21.86   | 21.27   | 25.09   | 27.28   | 8.39   | 8.09   | 7.64   |
| 1-2.c24461/1/1725  | PREDICTED: integrin beta-li   | 512821557 | XP_00293713 | 10.05   | 40.89  | 7.34    | 3.61    | 4.09    | 31.86   | 3.72    | 7.93    | 5.6     | 3.46   | 0.67   | 0      |
| 2-3.c39059/1/1897  | --                            | --        | --          | 2.52    | 4.67   | 2.74    | 3.3     | 2.6     | 1.55    | 4.92    | 1.97    | 2.04    | 45.11  | 25.26  | 45.2   |
| 2-3.c48697/1/2159  | --                            | --        | --          | 0       | 2.11   | 0.49    | 0.96    | 0       | 1.15    | 0.84    | 0.33    | 0       | 7.84   | 8.84   | 6.47   |
| 3-6.c1957/1/4234   | myosin, heavy chain 4, skelet | 47575800  | NP_00100124 | 1.34    | 0      | 2.69    | 2.3     | 1.85    | 0       | 2.36    | 1.93    | 1.72    | 0.67   | 0.24   | 0.36   |
| 2-3.c47652/1/2646  | PREDICTED: tenascin isoform   | 512858291 | XP_00491677 | 0.81    | 0      | 0       | 0.06    | 0       | 0.57    | 2.95    | 0.48    | 3.2     | 0.14   | 0      | 0.39   |
| 2-3.c49998/1/2377  | --                            | --        | --          | 6.44    | 0      | 3.94    | 1.73    | 5.09    | 1.51    | 1.6     | 5.09    | 4.62    | 0.18   | 2.3    | 0      |
| 1-2.c52188/1/1541  | PREDICTED: keratin, type II   | 326919555 | XP_00320604 | 3.66    | 0      | 183.05  | 159.86  | 32.78   | 0       | 139.8   | 106.95  | 194.07  | 53.54  | 30.63  | 80.22  |
| 3-6.c18240/1/3482  | Ca2+-ATPase 1 [Rana clamit    | 12055497  | CAC20853.1  | 3.2     | 0.81   | 3.66    | 2.37    | 3.16    | 1.74    | 3.68    | 4.01    | 4.26    | 1.15   | 1.17   | 1.02   |
| 1-2.c46271/1/1181  | troponin T [Hyla chrysoceles  | 69219560  | AAZ04163.1  | 278.34  | 309.26 | 311.76  | 255.79  | 224.08  | 1243.14 | 495.55  | 341.61  | 255.4   | 139.65 | 183.41 | 120.79 |
| 3-6.c18369/1/2791  | PREDICTED: lethal(3)malign    | 512819552 | XP_00491164 | 2.63    | 4.79   | 3.72    | 1.99    | 1.9     | 1.89    | 2.47    | 2.66    | 1.16    | 0      | 0.73   | 0.26   |
| 1-2.c24672/2/1442  | --                            | --        | --          | 29.98   | 64.67  | 18.34   | 24.59   | 0.98    | 7.94    | 9.07    | 10.92   | 11.62   | 118.25 | 91.48  | 108.46 |
| 2-3.c40223/1/2454  | --                            | --        | --          | 0       | 0.44   | 0       | 0.14    | 0.13    | 2.79    | 0.11    | 0       | 0.26    | 4.82   | 7      | 4.26   |
| 3-6.c14118/1/3010  | hypothetical protein CAPTEI   | 443727653 | ELU14322.1  | 1.59    | 8.37   | 2.31    | 2.59    | 1.01    | 2.69    | 1.51    | 1.01    | 3       | 20.97  | 45.59  | 28.84  |
| 1-2.c18264/2/1898  | acetylcholine receptor subuni | 148227704 | NP_00108091 | 2.21    | 6.41   | 5.46    | 3.25    | 1.88    | 13.04   | 1.73    | 4.02    | 4.92    | 0.46   | 0.32   | 0.89   |
| 1-2.c22009/3/1530  | PREDICTED: blood vessel e     | 847126715 | XP_01281814 | 0.19    | 0      | 0       | 0       | 2.44    | 6.59    | 2.89    | 3.55    | 0       | 0      | 0      | 0      |
| 1-2.c38440/1/1475  | acyl-CoA dehydrogenase fam    | 148228760 | NP_00107991 | 9       | 10.39  | 6.58    | 9.12    | 5.24    | 4.47    | 8.44    | 5.64    | 8.65    | 2.19   | 1.81   | 1.18   |
| 2-3.c6564/21/2418  | PREDICTED: beta-enolase [     | 637381761 | XP_00812393 | 6.82    | 0      | 1.47    | 5.5     | 7.76    | 0       | 3.79    | 6.49    | 10.89   | 4.99   | 0      | 0.23   |
| 3-6.c3028/8/3407   | PREDICTED: nuclear recept     | 512881896 | XP_00294045 | 48.61   | 30.6   | 36.82   | 28.11   | 29.608  | 11.33   | 14.9    | 21.99   | 26.55   | 6.49   | 3      | 13.34  |
| 1-2.c8824/1/5102.2 | PREDICTED: keratin, type I    | 543376583 | XP_00553145 | 1072.71 | 244.14 | 837.78  | 1223.32 | 414.84  | 204.04  | 1042.51 | 1071.03 | 871.02  | 590.63 | 381.71 | 261.13 |
| 1-2.c25784/1/1258  | PREDICTED: molybdenum c       | 512844256 | XP_00294295 | 5.23    | 6.7    | 0       | 7.3     | 0       | 2.08    | 2.61    | 3.5     | 3.14    | 42.83  | 56.33  | 20.29  |
| 1-2.c1620/94/1522  | novel aldo-keto reductase fam | 113931624 | NP_00103926 | 16.29   | 7.5    | 45.98   | 45.53   | 44.25   | 45.43   | 45.08   | 50.89   | 46.59   | 20.88  | 23.74  | 11.4   |
| 1-2.c12891/6/1502  | PREDICTED: prostaglandin      | 641764723 | XP_00816745 | 35.33   | 36.56  | 23.37   | 19.82   | 18.7    | 24.06   | 15.76   | 21.52   | 20.82   | 6.45   | 7.73   | 5.69   |
| 1-2.c43690/1/1778  | major facilitator superfamily | 153792409 | NP_00109335 | 0       | 0      | 2.43    | 1.08    | 0.66    | 0.05    | 3.5     | 0       | 2.38    | 0      | 0      | 0      |
| 2-3.c12301/1/2069  | PREDICTED: nascent polype     | 847099435 | XP_01281223 | 17.07   | 42.38  | 15.09   | 9.74    | 10.57   | 24.51   | 12.2    | 10.66   | 14.45   | 4.7    | 4.5    | 3.19   |
| 2-3.c8140/1/2107   | --                            | --        | --          | 4.45    | 12.63  | 1.75    | 1.97    | 2.52    | 4.42    | 4.89    | 3.1     | 2.27    | 49.77  | 39.85  | 21.88  |
| 2-3.c11965/2/2367  | PREDICTED: coagulation fa     | 554576773 | XP_00588021 | 2.29    | 0      | 1.69    | 2.48    | 0.58    | 0       | 2.33    | 4.05    | 2.63    | 0.72   | 0      | 0.77   |
| 2-3.c8741/1/2049   | ornithine decarboxylase 1 [X  | 148237898 | NP_00108016 | 41.95   | 242.31 | 17.87   | 33.56   | 16.5    | 25.41   | 11.68   | 26.27   | 32.94   | 9.02   | 8.77   | 7.57   |
| 2-3.c20773/1/2231  | --                            | --        | --          | 75.38   | 82.7   | 55.82   | 48.28   | 44.63   | 139.5   | 87.16   | 92.5    | 81.91   | 30     | 42.25  | 17.42  |
| 2-3.c55886/1/2096  | --                            | --        | --          | 5.61    | 24.51  | 3.03    | 4.53    | 6.92    | 15.16   | 4.52    | 3.31    | 3.84    | 35.31  | 35.93  | 49.73  |
| 2-3.c59443/1/2244  | --                            | --        | --          | 0.46    | 10.24  | 1.95    | 1.66    | 1.01    | 2.41    | 0       | 0.08    | 0       | 1.49   | 1.83   | 4.46   |
| 1-2.c48439/1/1637  | glyceraldehyde-3-phosphate c  | 300679438 | ADK27487.1  | 40.96   | 12.53  | 40.09   | 32.11   | 24.91   | 21.59   | 32.29   | 39.64   | 24.32   | 8.24   | 8.91   | 17.41  |
| 2-3.c23550/6/2037  | spermidine synthase [Xenopu   | 147902014 | NP_00108487 | 9.86    | 41.4   | 4.18    | 7.07    | 5.26    | 7.38    | 14.46   | 7.82    | 7.29    | 3.62   | 2.77   | 2.56   |
| 1-2.c10838/3/1848  | patatin-like phospholipase do | 118404478 | NP_00107265 | 2.32    | 0      | 0.76    | 4.22    | 0.96    | 0.17    | 1.71    | 0.51    | 1.01    | 0      | 0      | 0      |
| 1-2.c25860/1/1686  | 39S ribosomal protein L45, n  | 148235359 | NP_00107950 | 0       | 0      | 0       | 0       | 3.19    | 4.18    | 2.34    | 2.51    | 2.75    | 0      | 0.77   | 0      |
| 2-3.c19323/1/2447  | PREDICTED: phosphatidylir     | 344267740 | XP_00340572 | 29.49   | 28.81  | 21.25   | 14.82   | 19      | 18.91   | 19.68   | 16.15   | 20.64   | 6.58   | 9.71   | 4.91   |
| 1-2.c6626/1/7057.1 | muscle creatine kinase [Xeno  | 147899942 | NP_00108007 | 70.39   | 6.61   | 93.26   | 71.86   | 91.93   | 49.31   | 44.17   | 87.45   | 76.41   | 31.85  | 26.86  | 17.36  |
| 1-2.c31015/2/1388  | PREDICTED: multidrug resi     | 847126537 | XP_01281808 | 11.91   | 10.61  | 6.95    | 11.55   | 10.61   | 2.87    | 17.96   | 5.58    | 8.27    | 96.66  | 147.34 | 69.99  |
| 1-2.c33917/1/1268  | PREDICTED: sodium-couple      | 612052686 | XP_00750393 | 1.98    | 7.32   | 0.97    | 2.3     | 0       | 0.15    | 4.44    | 1.65    | 5.27    | 1.02   | 0.12   | 0      |
| 1-2.c14775/3/1310  | --                            | --        | --          | 22.53   | 0.26   | 11.25   | 20.41   | 9.84    | 46.51   | 34.6    | 24.61   | 48.18   | 16.98  | 12.26  | 9.18   |
| 2-3.c19947/1/2007  | --                            | --        | --          | 8.65    | 56.34  | 47.63   | 24.27   | 18.63   | 231.1   | 40.34   | 17.35   | 23.51   | 7.39   | 4.58   | 11.75  |
| 1-2.c49544/1/3724  | PREDICTED: actin, alpha ca    | 726987387 | XP_01039002 | 0       | 0.53   | 1.29    | 0       | 0.42    | 1.64    | 0.78    | 3.28    | 1.12    | 0      | 0      | 0      |
| 1-2.c12208/4/1387  | PREDICTED: tensin-1 [Xenc     | 847165849 | XP_01282637 | 12.3    | 0.01   | 5.79    | 19.98   | 12.9    | 6.07    | 1.75    | 2.92    | 0       | 24.33  | 28.46  | 15.73  |
| 1-2.c8282/7/1408.1 | PREDICTED: histone-lysine     | 635044876 | XP_00799802 | 1.07    | 1.63   | 1.69    | 2.1     | 1       | 2.68    | 4.81    | 1.19    | 4.01    | 0      | 0.31   | 0      |
| 1-2.c10731/8/1845  | PREDICTED: methylcrotono      | 542168352 | XP_00549274 | 26.09   | 27.39  | 16.93   | 20.35   | 17.29   | 20.92   | 15.62   | 14.05   | 15.83   | 3.71   | 5.85   | 5.51   |
| 1-2.c14679/5/1223  | uncharacterized protein LOC   | 118404006 | NP_00107215 | 0.98    | 2.22   | 1.25    | 1.28    | 0.55    | 0.82    | 0.78    | 0.98    | 0.59    | 10     | 9.61   | 25.39  |
| 2-3.c60402/1/2629  | --                            | --        | --          | 0       | 10.38  | 0       | 0       | 0       | 0       | 0       | 1.83    | 2.67    | 0.05   | 0      | 0      |

|                      |                                     |             |             |        |        |        |        |        |        |         |        |        |         |         |         |
|----------------------|-------------------------------------|-------------|-------------|--------|--------|--------|--------|--------|--------|---------|--------|--------|---------|---------|---------|
| 1-2.c44779/1/1324    | paxillin [Xenopus (Silurana)]       | 213983203   | NP_00113550 | 14.7   | 13.01  | 11.43  | 7.07   | 6.42   | 13.21  | 4.8     | 6.59   | 14.07  | 0.45    | 1.62    | 2.88    |
| 2-3.c52497/1/1916    | PREDICTED: four-jointed bc          | 847123236   | XP_01281754 | 0.48   | 3.28   | 0      | 0.13   | 0.45   | 0      | 0       | 0      | 0      | 6.15    | 3.65    | 0.21    |
| 3-6.c3020/5/4043.2   | PREDICTED: aldehyde oxid: 847167054 | XP_00293776 |             | 0.61   | 1.39   | 1.92   | 3.3    | 3.85   | 5.47   | 6.25    | 4.86   | 3.79   | 30.26   | 56.7    | 82.53   |
| 1-2.c44959/1/1535    | PREDICTED: something abo            | 847167797   | XP_01282698 | 19.04  | 38     | 4.84   | 7.82   | 5.52   | 8.49   | 9.59    | 16.42  | 7.93   | 2.54    | 1.78    | 5.09    |
| 1-2.c2132/14/1601    | LOC100036924 protein [Xen           | 120538285   | AAI29668.1  | 13.66  | 9.83   | 12.11  | 9      | 8.27   | 4.45   | 8.75    | 8.55   | 9.31   | 2.26    | 3.11    | 1.89    |
| 1-2.c5034/6/1449     | PREDICTED: secernin-3 [Ch           | 530621714   | XP_00530048 | 11.59  | 4.12   | 11.58  | 10.6   | 10.53  | 6.64   | 7.48    | 10.08  | 9.88   | 2.51    | 2.44    | 2.16    |
| 1-2.c23339/1/1762.:- | --                                  | --          | --          | 880.65 | 25.27  | 123.26 | 661.19 | 615.19 | 59.33  | 1285.95 | 839.43 | 895.96 | 363.03  | 860.06  | 72.86   |
| 1-2.c29344/2/1805    | myosin heavy chain, partial [I      | 4249701     | AAD13772.1  | 0.97   | 0.6    | 2.82   | 0.85   | 1.39   | 0      | 2.8     | 0.54   | 1.11   | 0       | 0       | 0.12    |
| 2-3.c42150/1/2086    | --                                  | --          | --          | 0.15   | 1.76   | 0.64   | 12.71  | 0      | 0      | 5.69    | 0      | 2.13   | 45.11   | 31.36   | 22.94   |
| 2-3.c8550/11/2598    | PREDICTED: pre-rRNA-pro             | 768932342   | XP_01160682 | 5.04   | 25.69  | 5.56   | 3.75   | 5.64   | 17.62  | 5.02    | 4.05   | 3.58   | 1.35    | 0       | 1.5     |
| 1-2.c19990/2/1403.:- | --                                  | --          | --          | 0.38   | 0.97   | 0.59   | 2.16   | 1.64   | 0.46   | 0.35    | 1.32   | 0.98   | 27.77   | 17.01   | 38.93   |
| 1-2.c25545/1/1405    | PREDICTED: palmdelphin [C           | 512835762   | XP_00293701 | 0      | 0      | 1.17   | 2.61   | 0      | 0      | 0.66    | 0.33   | 2.26   | 17.81   | 24.64   | 8.3     |
| 2-3.c23790/1/2240    | --                                  | --          | --          | 9.42   | 33.97  | 10.4   | 13.08  | 8.85   | 7.47   | 6.45    | 9.58   | 13.67  | 4.23    | 2.82    | 1.66    |
| 1-2.c17225/2/1260    | PREDICTED: 2',5'-phospho            | 558198612   | XP_00613096 | 0      | 9.42   | 4.5    | 2.98   | 0.23   | 3.91   | 3.81    | 0.76   | 4.02   | 24.33   | 49.83   | 27.82   |
| 1-2.c50160/1/1668    | PREDICTED: poly [ADP-rib            | 847173218   | XP_01280975 | 1.18   | 0.87   | 0.61   | 0.14   | 0.3    | 0.29   | 2.2     | 2.48   | 0.34   | 0       | 0       | 0.19    |
| 2-3.c39820/1/2575    | --                                  | --          | --          | 8.85   | 13.43  | 10.36  | 5.35   | 10.87  | 14.28  | 10.47   | 7.92   | 11.67  | 2.59    | 2.07    | 2.59    |
| 2-3.c49368/1/2153    | PREDICTED: choline transp           | 530641746   | XP_00530766 | 3.53   | 1.29   | 4.01   | 0.92   | 1.5    | 1.05   | 2.51    | 1.75   | 2.98   | 0       | 0       | 0.69    |
| 1-2.c17349/1/2846    | PREDICTED: actin, alpha sk          | 326920308   | XP_00320641 | 4.74   | 0.31   | 4.47   | 2.35   | 3.29   | 2.31   | 4.04    | 4.1    | 4.2    | 0.8     | 0.79    | 1.33    |
| 2-3.c8480/1/2382     | acidic leucine-rich nuclear ph      | 148228396   | NP_00108315 | 15.61  | 14.48  | 15.7   | 15.95  | 17.4   | 6.63   | 7.89    | 13.99  | 11.73  | 2.1     | 1.96    | 6.79    |
| 2-3.c17471/2/2575    | pentraxin 3, long precursor [D      | 148226508   | NP_00109115 | 1.54   | 0      | 13.46  | 2      | 6.9    | 0.49   | 0.49    | 1.76   | 3.05   | 0.34    | 0       | 0       |
| 2-3.c28056/1/2679    | PREDICTED: collagen alpha           | 194224629   | XP_00191505 | 7.7    | 61.43  | 19.63  | 7.45   | 2.47   | 1.67   | 4.94    | 12.38  | 3.47   | 0       | 0       | 0.71    |
| 1-2.c19329/1/1859    | uncharacterized protein LOC         | 148232016   | NP_00109117 | 32.08  | 0.88   | 0.3    | 7.41   | 14.96  | 0.83   | 17.98   | 21.28  | 11.02  | 5.25    | 13.06   | 1.31    |
| 3-6.c14525/1/7300    | PREDICTED: alpha-actinin-:          | 602667068   | XP_0074391C | 22.22  | 5.55   | 25.9   | 26.72  | 40.49  | 31.42  | 44.11   | 32.16  | 24.6   | 14.31   | 7.17    | 17.26   |
| 2-3.c33112/2/2350    | PREDICTED: protein RCC2.            | 859758337   | XP_01290396 | 3.02   | 0.33   | 2.03   | 2.36   | 3      | 8.82   | 7.09    | 0      | 0      | 18.36   | 22.68   | 30.26   |
| 1-2.c28376/1/1287    | --                                  | --          | --          | 14.67  | 41.56  | 12.48  | 11.53  | 11.49  | 20.97  | 9.94    | 8.08   | 18.89  | 4.35    | 1.68    | 3.55    |
| 3-6.c19183/1/3388    | PREDICTED: titin-like [Pyth         | 602631486   | XP_00742264 | 25.6   | 11.98  | 45.12  | 37.36  | 35.64  | 54.19  | 35.16   | 34.1   | 44.21  | 13.54   | 10.55   | 19.99   |
| 2-3.c23827/1/2044    | --                                  | --          | --          | 7.14   | 0      | 3.46   | 5.27   | 2.05   | 0.3    | 2.06    | 6.07   | 8.18   | 0.63    | 2.86    | 0       |
| 2-3.c19571/1/2065    | --                                  | --          | --          | 12.8   | 0      | 2.87   | 1.9    | 5.52   | 2.61   | 4.38    | 4.57   | 2.13   | 0       | 0       | 1.16    |
| 2-3.c42569/1/2275    | pancreatic progenitor cell dif      | 604159143   | AHV78314.1  | 566.32 | 1440   | 297.31 | 991.12 | 378.36 | 645.12 | 1001.15 | 375.81 | 554.51 | 5161.82 | 6545.91 | 5098.11 |
| 1-2.c20750/1/1839    | PREDICTED: uncharacterize           | 847158215   | XP_01282465 | 2.02   | 17.12  | 1.88   | 4.14   | 1.16   | 3.81   | 1.37    | 0.61   | 2.04   | 16.95   | 25.23   | 9.95    |
| 1-2.c18249/1/1704    | --                                  | --          | --          | 3.54   | 3.81   | 15.94  | 19.31  | 13.72  | 14.86  | 28.92   | 7.57   | 16.64  | 1.99    | 1.1     | 7.52    |
| 1-2.c36153/1/1633    | --                                  | --          | --          | 12.93  | 5.7    | 35.49  | 16.08  | 16.96  | 23.38  | 19.88   | 35.86  | 34.11  | 16.4    | 4.86    | 12.03   |
| 2-3.c8820/1/2273.1   | --                                  | --          | --          | 0.68   | 2.1    | 0.86   | 2.66   | 0.9    | 1.99   | 0.45    | 0.15   | 0.65   | 14.14   | 18.82   | 4.12    |
| 3-6.c18162/1/2809    | PREDICTED: echinoderm m             | 847154147   | XP_01282378 | 3.28   | 8.35   | 2.69   | 0      | 1.79   | 0.96   | 0.02    | 0      | 0      | 5.68    | 0       | 10.04   |
| 2-3.c10677/1/2224    | hypothetical protein CAPTEI         | 443682880   | ELT87315.1  | 7.32   | 55.27  | 3.66   | 8.25   | 4.83   | 14.15  | 7.79    | 8.88   | 11.67  | 77.93   | 148.89  | 82.23   |
| 2-3.c45029/13/2081   | uncharacterized protein LOC         | 147906566   | NP_00109117 | 52.12  | 122.31 | 56.15  | 46.85  | 40.78  | 141.4  | 40.66   | 43.61  | 45.15  | 17.32   | 14.64   | 18.71   |
| 2-3.c16800/2/2127    | --                                  | --          | --          | 6.71   | 21.18  | 3.11   | 5.51   | 0      | 2.96   | 10.49   | 6.22   | 5.44   | 1.73    | 0       | 1.94    |
| 2-3.c17159/1/2231    | --                                  | --          | --          | 5.33   | 116.12 | 11.55  | 18.58  | 11.57  | 59.27  | 16.6    | 9.75   | 20.84  | 150.6   | 200.45  | 109.55  |
| 2-3.c21944/2/2127    | PREDICTED: myosin-3 [Xer            | 847172863   | XP_01280963 | 3.91   | 14.34  | 7.2    | 5.31   | 4.33   | 69.53  | 7.5     | 3.23   | 5.5    | 2.16    | 0.97    | 0.86    |
| 3-6.c15051/1/3387    | FXFD domain containing ior          | 147902838   | NP_0010864C | 6.17   | 8.47   | 7.16   | 4.29   | 3.21   | 3.72   | 6.24    | 4.17   | 2.43   | 2.23    | 0.05    | 1.28    |
| 2-3.c14687/1/1981    | --                                  | --          | --          | 8.84   | 7.38   | 11     | 11.26  | 8.09   | 2.95   | 7.29    | 6.99   | 11.97  | 1.96    | 3.68    | 2.5     |
| 3-6.c18506/1/2622    | collagen alpha-1(III) chain pr      | 218847780   | NP_00113637 | 20.68  | 160.38 | 29.25  | 18.47  | 55.36  | 446.27 | 40.05   | 14.06  | 28.68  | 16.73   | 2.85    | 10.58   |
| 1-2.c19745/1/1622    | Sperm-associated antigen 1, f       | 676584923   | KFO74026.1  | 0      | 0      | 0.61   | 0      | 0      | 0      | 2.09    | 0      | 2.08   | 0       | 0       | 0       |
| 2-3.c37303/2/2551    | transmembrane protein 182 p         | 118404178   | NP_0010724C | 0      | 0.84   | 0.52   | 0.69   | 0.41   | 7.95   | 1.46    | 1.76   | 0      | 0       | 0       | 0       |
| 1-2.c11344/1/1759    | succinyl-CoA ligase [ADP/G          | 71896153    | NP_00102558 | 71.7   | 46.79  | 113.94 | 120.92 | 109.38 | 73.55  | 111.65  | 107.45 | 134.32 | 30.97   | 92.15   | 30.21   |
| 2-3.c23763/1/2466    | PREDICTED: uncharacterize           | 301617369   | XP_00293811 | 0.03   | 0      | 0      | 0      | 0.45   | 0.55   | 1.34    | 1.01   | 0      | 0       | 0       | 0       |
| 1-2.c4450/2/1272     | --                                  | --          | --          | 0      | 0      | 0      | 0      | 0      | 0      | 2.35    | 3.62   | 0      | 0       | 0       | 0       |
| 1-2.c52047/1/1687    | PREDICTED: serine--tRNA             | 602647281   | XP_00743006 | 12.85  | 30.99  | 7.4    | 5      | 6.82   | 44.15  | 23.28   | 11.05  | 11.85  | 5.05    | 4.68    | 5.28    |
| 2-3.c12858/2/2655    | PREDICTED: myosin-7B [X             | 512871888   | XP_00293293 | 23.5   | 41.1   | 18.29  | 21.44  | 16.42  | 127.54 | 19.04   | 16.99  | 13.12  | 7.17    | 4.97    | 6.07    |
| 1-2.c34179/1/1524    | PREDICTED: periplakin [Xe           | 512869040   | XP_00294105 | 11.4   | 7.96   | 12.72  | 1.86   | 11.21  | 11.87  | 0.02    | 0      | 0.92   | 10.15   | 27.04   | 8.77    |
| 2-3.c26482/2/2492    | --                                  | --          | --          | 2.06   | 5.06   | 4.56   | 0      | 1.75   | 9.62   | 1.27    | 3.48   | 4.67   | 0       | 0       | 1.54    |
| 2-3.c53385/1/2333    | PREDICTED: uncharacterize           | 512848095   | XP_00491541 | 2.27   | 25.45  | 2.05   | 3.71   | 1.35   | 6.4    | 2.8     | 1.64   | 3.48   | 28.39   | 44.49   | 23.79   |
| 2-3.c60333/2/2139    | --                                  | --          | --          | 5.97   | 0      | 0      | 0      | 1.51   | 0      | 3.67    | 0      | 5.8    | 0       | 0.01    | 0.03    |
| 2-3.c60667/1/2143    | tRNA-dihydrouridine(47) syr         | 147903417   | NP_00107966 | 13.2   | 22.48  | 5.05   | 5.85   | 0      | 0      | 8.85    | 8.29   | 7.24   | 6.36    | 1.36    | 0       |
| 2-3.c25964/1/2469.:- | --                                  | --          | --          | 0      | 0      | 0      | 0      | 0      | 1.58   | 0       | 0      | 0      | 6.57    | 18.84   | 4.68    |
| 1-2.c33438/1/1568    | --                                  | --          | --          | 9.98   | 15.88  | 5.68   | 6.7    | 6.11   | 4.97   | 11.6    | 0.05   | 4.85   | 60.14   | 61.93   | 37.65   |
| 2-3.c8551/1/1879     | SEC62 homolog [Xenopus la           | 148234873   | NP_00108684 | 0      | 0      | 0      | 0.4    | 0      | 1.47   | 0       | 0      | 0      | 6.1     | 10.09   | 0       |
| 1-2.c28315/1/1394.:- | --                                  | --          | --          | 77.63  | 31.62  | 141.17 | 72.72  | 65.05  | 6.06   | 145.47  | 83.21  | 105.51 | 57.69   | 7.15    | 41.92   |

|                    |                                |           |             |        |         |        |         |         |        |        |         |         |        |        |        |
|--------------------|--------------------------------|-----------|-------------|--------|---------|--------|---------|---------|--------|--------|---------|---------|--------|--------|--------|
| 1-2.c51096/9/1414  | ureidopropionase, beta [Xeno   | 148234835 | NP_00108750 | 4.91   | 10.58   | 10.21  | 16.49   | 9.79    | 16.6   | 15.43  | 12.61   | 11.07   | 2.73   | 3.37   | 5.06   |
| 1-2.c2443/2/1468.1 | c-fos induced growth factor (  | 189217641 | NP_00112126 | 9.6    | 9.05    | 6.01   | 4.05    | 4.89    | 4.27   | 4.01   | 5.74    | 5.63    | 71.97  | 52.77  | 57.47  |
| 1-2.c8815/2/1731   | phosphoglycerate kinase 1 [X   | 62858027  | NP_00101654 | 14.04  | 0       | 7.61   | 17.04   | 7.79    | 0.8    | 11.38  | 9.44    | 10.77   | 0      | 2.82   | 6.1    |
| 2-3.c54343/1/2347  | PREDICTED: dual specificit     | 643861343 | XP_00794372 | 0      | 0       | 0      | 1.14    | 0       | 0.11   | 0.26   | 0       | 0       | 5.04   | 4.3    | 1.99   |
| 2-3.c62822/4/2266  | uncharacterized protein LOC    | 147905311 | NP_00109066 | 0      | 0       | 0      | 0.95    | 0       | 0      | 0      | 1.12    | 1.32    | 0      | 0      | 0      |
| 3-6.c2423/20/3512  | PREDICTED: very low-dens       | 301609344 | XP_00293422 | 0      | 0       | 0.45   | 0       | 0.6     | 0.43   | 0      | 0.69    | 0.81    | 0      | 0      | 0      |
| 1-2.c24478/1/1602. | --                             | --        | --          | 4.41   | 31.4    | 2.72   | 2.58    | 1.95    | 7.67   | 0      | 1.19    | 1.07    | 32.65  | 76.36  | 20.35  |
| 3-6.e10674/1/2961. | --                             | --        | --          | 2.17   | 2.62    | 3.01   | 1.34    | 1.34    | 3.6    | 1.18   | 2.91    | 4.24    | 0.19   | 0.33   | 0      |
| 2-3.c33579/1/2157  | PREDICTED: succinate dehy      | 847123585 | XP_01281758 | 5.92   | 2.79    | 4.24   | 10.45   | 10.07   | 4.5    | 8.12   | 6.7     | 10.43   | 1.87   | 1.92   | 3.61   |
| 2-3.c42427/1/2811  | --                             | --        | --          | 3.41   | 253.48  | 8.7    | 3.62    | 4.8     | 170.29 | 2.12   | 4.39    | 6.32    | 2.73   | 0.23   | 0.39   |
| 1-2.e14456/3/1825  | --                             | --        | --          | 0.57   | 0.99    | 1.19   | 0       | 2.12    | 0      | 2.63   | 0       | 0       | 14.21  | 6.74   | 14.68  |
| 2-3.c6906/1/2785   | PREDICTED: metastasis-ass      | 847154043 | XP_01282374 | 0.95   | 6.32    | 0.7    | 0.24    | 0.11    | 0      | 0.09   | 0.58    | 1.2     | 0      | 0      | 0      |
| 2-3.c40136/1/1855  | molybdate-anion transporter    | 189217675 | NP_00112128 | 0      | 5.84    | 0      | 0       | 0       | 0      | 1.59   | 1.46    | 0       | 0      | 0      | 0      |
| 2-3.c48796/1/2002  | PREDICTED: myosin heavy        | 657587209 | XP_00829788 | 13.8   | 0.33    | 28.57  | 18.66   | 23.18   | 0.39   | 11.13  | 26.86   | 23.65   | 8.95   | 6.84   | 7.69   |
| 1-2.c48353/1/1474  | --                             | --        | --          | 4.94   | 22.63   | 4.16   | 4.7     | 3.19    | 5.55   | 3.37   | 3.02    | 3.01    | 38.98  | 26.33  | 38.94  |
| 1-2.c31225/1/1129  | --                             | --        | --          | 0      | 4.62    | 0      | 0       | 0       | 5.28   | 0      | 5.06    | 0       | 26.64  | 32.74  | 20.24  |
| 3-6.c4220/1/4081   | PREDICTED: myosin-3 [Xer       | 847172863 | XP_01280963 | 1.41   | 6.69    | 3.85   | 1.7     | 2       | 60.53  | 1.45   | 2.78    | 1.2     | 0.13   | 0.12   | 0.7    |
| 2-3.c16217/1/2133  | PREDICTED: synaptopodin        | 512828724 | XP_00293730 | 2.06   | 2.11    | 0      | 2.47    | 1.67    | 2.97   | 4.65   | 3.91    | 5.89    | 2.5    | 0.3    | 0.66   |
| 2-3.c2636/32/2205  | PREDICTED: 60 kDa heat sf      | 768339285 | XP_01157440 | 9.28   | 44.32   | 3.99   | 7.73    | 21.33   | 55.42  | 18.98  | 7.18    | 6.68    | 3.24   | 0.86   | 2.46   |
| 3-6.e13051/2/3182  | forkhead box protein K2 [Xer   | 213982945 | NP_00113563 | 29.45  | 29.62   | 15.47  | 23.32   | 12.75   | 7.63   | 9.16   | 24.55   | 27.16   | 7.15   | 5.5    | 6.13   |
| 2-3.c2446/2/2299   | WD repeat and SOCS box-co      | 45361625  | NP_989387.1 | 1.99   | 4.09    | 1.21   | 2.18    | 2       | 1.11   | 1.6    | 2.66    | 2.98    | 0.62   | 0.31   | 0.22   |
| 1-2.c10819/13/1575 | PREDICTED: keratin 19, typ     | 847167891 | XP_01282703 | 34.77  | 11.15   | 25.25  | 31.35   | 13.84   | 8.37   | 25.34  | 27.62   | 20.03   | 13.36  | 5.81   | 7.61   |
| 2-3.c49481/1/2244  | PREDICTED: creatine kinas      | 126344225 | XP_00136422 | 1.68   | 0       | 1.81   | 1.24    | 1.35    | 0.65   | 2.77   | 0.5     | 1.79    | 0.2    | 0.17   | 0.1    |
| 1-2.c14263/1/1364  | reverse transcriptase, partial | 347227    | AAA49027.1  | 1.19   | 3.69    | 0      | 0.23    | 0.73    | 2.42   | 1.32   | 0.41    | 0       | 23.75  | 23.37  | 4.93   |
| 2-3.c12469/1/6062  | --                             | --        | --          | 0      | 27.04   | 0.17   | 11.59   | 0       | 0      | 0      | 11.16   | 12.59   | 0      | 0      | 0.17   |
| 3-6.e5644/1/5515.1 | glycogen synthase kinase-3 b   | 148226891 | NP_00108375 | 0.06   | 0       | 0      | 0       | 0       | 0.96   | 1.54   | 0.25    | 0       | 0      | 0      | 0      |
| 2-3.c2857/1/2285   | --                             | --        | --          | 13.95  | 1.51    | 10.92  | 7.41    | 2.86    | 2.02   | 4.37   | 5.63    | 1.59    | 0.8    | 0.46   | 0.71   |
| 1-2.c33457/1/4870. | PREDICTED: LOW QUALI           | 637377851 | XP_00812323 | 83.31  | 11.48   | 104.78 | 81.48   | 114.71  | 60.45  | 81.4   | 103.94  | 112.73  | 37.66  | 29.81  | 38.67  |
| 1-2.e1978/16/1820  | beta-hexosaminidase subunit    | 187608414 | NP_00112045 | 15.61  | 2.88    | 2.4    | 7.09    | 8.04    | 5.52   | 11.14  | 6.86    | 5.68    | 70.09  | 59.62  | 94.17  |
| 2-3.c5996/1/2143   | glutamate oxaloacetate trans   | 333805525 | BAK26556.1  | 141.92 | 43.9    | 104.77 | 122.98  | 48.52   | 38.63  | 105.83 | 40.9    | 67.25   | 19.69  | 23.01  | 38.99  |
| 1-2.c44455/1/1718  | PREDICTED: bcl-2-like prot     | 847177164 | XP_00492107 | 21.16  | 16.77   | 26.24  | 26.4    | 26.77   | 7.78   | 17     | 16.03   | 28.74   | 3.45   | 8.12   | 10.12  |
| 3-6.e11324/1/2740  | PREDICTED: nascent polype      | 847099448 | XP_01281224 | 7.98   | 4.76    | 6.24   | 3.21    | 2.5     | 14.75  | 3.04   | 4.41    | 3.99    | 1      | 1.09   | 0.91   |
| 2-3.c4944/1/2611   | PREDICTED: ATP-dependen        | 795120083 | XP_01183217 | 0.58   | 13.6    | 0.6    | 1.43    | 0.73    | 3.31   | 1.26   | 0.38    | 1.49    | 12.82  | 24.38  | 9.7    |
| 1-2.c18995/1/1256  | --                             | --        | --          | 106.39 | 4.37    | 5.16   | 37.01   | 22.12   | 2.09   | 22.74  | 36.37   | 32.64   | 6.27   | 26.75  | 4.09   |
| 1-2.c36758/1/6899. | nuclease-sensitive element-bi  | 147903761 | NP_00107936 | 971.79 | 4882.91 | 965.89 | 1207.16 | 1008.67 | 2057.8 | 961.47 | 1058.23 | 1428.72 | 428.73 | 196.88 | 726.75 |
| 1-2.c49364/1/1192  | PREDICTED: eukaryotic init     | 821477144 | XP_01240194 | 0      | 1.37    | 0      | 0       | 0       | 2.69   | 0      | 0       | 0       | 3.26   | 5.15   | 2.87   |
| 2-3.c6297/2/2080   | --                             | --        | --          | 0.3    | 15.19   | 2.98   | 1.03    | 2.54    | 8.33   | 2.2    | 1.44    | 1.16    | 24.75  | 8.33   | 22.59  |
| 3-6.e14882/1/4946. | PREDICTED: calpain-7 [Anc      | 327274957 | XP_00322224 | 0.07   | 0.97    | 0.55   | 2.1     | 0       | 2.35   | 0      | 0       | 0       | 2.37   | 0.22   | 4.63   |
| 2-3.c62194/3/2047  | PREDICTED: actin-related p     | 663283393 | XP_00849925 | 0      | 9.41    | 2.74   | 0       | 0       | 0      | 1.32   | 3.59    | 0.52    | 0      | 0      | 0      |
| 3-6.c6424/1/3069   | PREDICTED: ectonucleotide      | 847135208 | XP_01282011 | 0.07   | 24.95   | 0.43   | 0.17    | 0.72    | 8.35   | 1.89   | 0.1     | 0.53    | 13.08  | 4.64   | 18.21  |
| 3-6.e17950/7/3451  | myosin, heavy chain 4, skelet  | 47575800  | NP_00100124 | 0.45   | 0       | 1.35   | 0.87    | 0.22    | 0      | 0.9    | 0       | 0.76    | 0      | 0      | 0      |
| 3-6.e17076/1/2738. | --                             | --        | --          | 0      | 6.96    | 0      | 23.01   | 22.35   | 4.43   | 20.58  | 27.68   | 36.16   | 0      | 27.67  | 0      |
| 1-2.c15720/1/1380  | UBA domain containing 1 [X     | 148235257 | NP_00108937 | 9.8    | 4.02    | 6.59   | 7.31    | 7.84    | 1.45   | 10.3   | 5.57    | 17.95   | 1.04   | 2.46   | 5.04   |
| 1-2.c30288/1/1350  | --                             | --        | --          | 65.08  | 11.93   | 41.39  | 67.3    | 55.41   | 27.23  | 70.46  | 46.93   | 87.08   | 32.02  | 26.75  | 22.62  |
| 1-2.e2105/17/1262  | transmembrane protein 182 p    | 118404178 | NP_00107240 | 12.42  | 42.12   | 29.45  | 15.61   | 15.22   | 157.62 | 13.03  | 10.32   | 12.25   | 4.14   | 3.8    | 2.21   |
| 1-2.c48651/1/5600. | muscle creatine kinase [Xeno   | 147899942 | NP_00108007 | 25.55  | 2.06    | 13.28  | 8.83    | 9.33    | 6.28   | 23.28  | 14.12   | 11.34   | 4.57   | 3.81   | 3.53   |
| 1-2.c9303/1/1473   | --                             | --        | --          | 85.12  | 0.69    | 24.72  | 28.88   | 54.72   | 0.98   | 22.51  | 55.01   | 31.47   | 11.79  | 5.23   | 7.26   |
| 2-3.c4505/1/2004   | PREDICTED: glycogen [stan      | 327281085 | XP_00322528 | 11.53  | 0.73    | 10.7   | 20.23   | 18.7    | 1.95   | 8.21   | 10.75   | 10.15   | 1.6    | 1.5    | 5.3    |
| 3-6.c18246/1/3720. | hypothetical protein, conserv  | 557144680 | CDI75148.1  | 3.83   | 4.51    | 6.66   | 6.89    | 7.52    | 17.39  | 9.51   | 6.89    | 9.05    | 2.28   | 2.97   | 3.69   |
| 2-3.c46635/1/2202. | PREDICTED: solute carrier f    | 301613957 | XP_00293647 | 0.22   | 1.46    | 0.57   | 1.01    | 1.43    | 0.43   | 0.08   | 0.25    | 0.33    | 7.11   | 7.52   | 8.97   |
| 3-6.c4669/1/4636.1 | myosin heavy chain, partial    | 4249701   | AAD13772.1  | 1.59   | 0       | 2.03   | 1.1     | 1.64    | 0      | 1.4    | 1.38    | 2.1     | 0.15   | 0.27   | 0.38   |
| 2-3.c55773/1/1954. | --                             | --        | --          | 12.12  | 5.44    | 10.65  | 37.18   | 14.83   | 16.3   | 25.57  | 9.6     | 23.01   | 6.51   | 5.31   | 5.98   |
| 3-6.e14815/1/3319  | PREDICTED: myosin-bindin       | 557258509 | XP_00601494 | 1.86   | 14.28   | 7.14   | 6.41    | 2.35    | 279.36 | 2.87   | 8.87    | 3.79    | 0      | 0      | 0.94   |
| 2-3.c59609/1/1968  | PREDICTED: CD99 antigen-       | 301623490 | XP_00294104 | 0      | 0       | 0      | 0       | 0       | 0      | 1.59   | 0       | 2       | 0      | 0      | 0      |
| 1-2.c29489/3/1675  | PREDICTED: thrombospond        | 847131343 | XP_01281915 | 0.86   | 4.4     | 0.99   | 2.35    | 1.5     | 11.22  | 5      | 0.05    | 0.72    | 30.44  | 21.84  | 12.41  |
| 1-2.c38076/1/3768. | muscle creatine kinase [Xeno   | 147899942 | NP_00108007 | 45.33  | 4.37    | 60.72  | 42.23   | 49.04   | 28.31  | 38.57  | 49.28   | 49.9    | 11.98  | 14.42  | 24.96  |
| 2-3.c41744/1/2519. | --                             | --        | --          | 0.45   | 13.77   | 0.89   | 1.15    | 1.31    | 2.42   | 0.61   | 0.41    | 1.99    | 15.35  | 22.82  | 8.43   |
| 2-3.c49103/1/2458. | --                             | --        | --          | 28.65  | 69.05   | 12.23  | 14.33   | 14.41   | 14.74  | 19.86  | 17.39   | 14.78   | 182.13 | 227.67 | 102.39 |

|                    |                                  |           |             |         |        |         |         |         |        |        |         |         |        |         |        |
|--------------------|----------------------------------|-----------|-------------|---------|--------|---------|---------|---------|--------|--------|---------|---------|--------|---------|--------|
| 3-6.c15880/1/5573  | myosin, heavy chain 2, skelet    | 55742222  | NP_00100680 | 3.75    | 0.12   | 7.55    | 6.06    | 5.14    | 0.1    | 3.76   | 7.24    | 5.01    | 2.19   | 1.12    | 1.63   |
| 1-2.e18950/2/1384  | PREDICTED: zinc finger pro       | 847139787 | XP_01282101 | 10.4    | 17.42  | 4.98    | 5.12    | 2.87    | 5.54   | 3.12   | 4.59    | 5.91    | 0.61   | 1.33    | 0.48   |
| 1-2.e42887/6/1598  | PREDICTED: myosin-4 [Xer         | 847156920 | XP_01282446 | 1794.78 | 31.28  | 1102.64 | 1087.89 | 1077.07 | 6.76   | 984.09 | 3503.95 | 2795.11 | 477.95 | 342.84  | 488    |
| 2-3.c37066/1/2329  | cellular retinoic acid-binding   | 25453404  | NP_058940.1 | 5.8     | 11.28  | 2.85    | 5.8     | 7.37    | 3.1    | 8.02   | 3.28    | 5.91    | 57.08  | 64.92   | 41.1   |
| 2-3.e59054/1/2659  | rec1 protein [Xenopus (Silura    | 171846900 | AAI61455.1  | 0       | 0.92   | 0.35    | 0       | 0       | 0.61   | 1.39   | 0       | 1.04    | 0      | 0       | 0      |
| 2-3.c38881/1/2380  | PREDICTED: protocadherin         | 512816337 | XP_00294091 | 0.84    | 32.14  | 0.9     | 0.62    | 1.1     | 8.57   | 3.74   | 2.02    | 2.74    | 0.63   | 0       | 0.76   |
| 1-2.e19267/1/1414  | trimeric intracellular cation cl | 148237167 | NP_00107953 | 16.16   | 3.54   | 25.87   | 17.42   | 17.91   | 2.82   | 3.28   | 12.19   | 12.13   | 0      | 0       | 3.87   |
| 3-6.e16660/1/3265  | --                               | --        | --          | 7.36    | 6.32   | 8.63    | 4.01    | 7.32    | 2.33   | 5.1    | 6.55    | 5.08    | 1.56   | 0.38    | 3.15   |
| 1-2.c32987/1/1430  | --                               | --        | --          | 12.11   | 4.09   | 29.57   | 33.32   | 22.51   | 7.19   | 37.51  | 39.66   | 25.13   | 8.92   | 1.41    | 25.52  |
| 2-3.c39805/1/2408  | PREDICTED: sodium/potass         | 620963907 | XP_00766720 | 1.47    | 2.56   | 0       | 3.18    | 0       | 0.85   | 3.01   | 0       | 0.71    | 12.83  | 11.15   | 17.06  |
| 2-3.e37339/1/2537  | PREDICTED: nuclear recept        | 512881896 | XP_00294045 | 49.62   | 24.11  | 33.17   | 27.82   | 16.48   | 2.77   | 9.23   | 14.91   | 28.77   | 2.65   | 3.93    | 6      |
| 1-2.e46225/1/1329  | --                               | --        | --          | 1.27    | 0.92   | 0.37    | 1.41    | 1.26    | 1.09   | 1.81   | 0.98    | 0.14    | 14.37  | 20.27   | 13.67  |
| 1-2.e49914/1/1729  | PREDICTED: proline-rich tri      | 597733803 | XP_00722921 | 20.06   | 4.3    | 20.89   | 8.44    | 8.77    | 1.94   | 2.06   | 8.8     | 10.01   | 0.26   | 0.61    | 0.22   |
| 2-3.e14430/1/1901  | --                               | --        | --          | 4.33    | 0.28   | 7.43    | 4.52    | 4.04    | 0.84   | 4.04   | 6.27    | 5.32    | 1.38   | 1.5     | 1.11   |
| 2-3.e27183/1/2627  | --                               | --        | --          | 1.26    | 20.47  | 0.82    | 2.24    | 1.69    | 3.67   | 1.55   | 1.53    | 2.56    | 19.27  | 33.02   | 14.01  |
| 2-3.c53510/1/2445  | ubiquitin carboxyl-terminal h    | 183986733 | NP_00111695 | 0       | 0      | 0       | 0       | 0.4     | 0      | 0      | 0       | 0       | 2.95   | 0       | 2.65   |
| 1-2.e12240/1/1300  | PREDICTED: alpha-aminoac         | 699658970 | XP_00989810 | 2.25    | 3.64   | 15.26   | 0       | 5.23    | 29.09  | 16.04  | 13.72   | 17.22   | 6.17   | 10.08   | 0.24   |
| 2-3.e1948/2/2285   | PREDICTED: adenylyl cycla        | 301606235 | XP_00293272 | 14.03   | 7.63   | 14.21   | 9.29    | 11.66   | 15.67  | 6.82   | 11.36   | 10.43   | 3.55   | 3.88    | 2.44   |
| 3-6.e10531/1/3124  | PREDICTED: talin-2 isoform       | 847147373 | XP_01282232 | 15.91   | 8.75   | 21.19   | 11.46   | 17.31   | 14     | 15.22  | 14.06   | 13.78   | 2.46   | 2.45    | 6.52   |
| 1-2.e22567/1/1576  | PREDICTED: transmembran          | 847095050 | XP_01281107 | 45.03   | 58.63  | 16.59   | 16.96   | 25.08   | 19.24  | 25.28  | 39.57   | 30.38   | 11.9   | 11.29   | 13.99  |
| 1-2.e49257/1/1239  | --                               | --        | --          | 81.15   | 159.03 | 37.66   | 82.6    | 44.81   | 104.78 | 140.12 | 63.05   | 91.75   | 792.13 | 1144.82 | 648.76 |
| 2-3.e10834/1/2448  | PREDICTED: putative nucle        | 512821917 | XP_00491191 | 1.09    | 11.88  | 0.75    | 4.34    | 0.76    | 2.18   | 1.91   | 0       | 0.86    | 5.85   | 21.11   | 17     |
| 2-3.e41391/1/2449  | --                               | --        | --          | 2.31    | 11.6   | 14.04   | 5.76    | 5.79    | 63.87  | 8.21   | 4.44    | 5.59    | 1.45   | 0.58    | 2.94   |
| 3-6.e4001/1/3035.1 | Transcription factor BTF3 4,     | 676423020 | KFO64485.1  | 277.95  | 606.5  | 264.78  | 225.57  | 210.92  | 640.68 | 325.39 | 237.84  | 239.34  | 105.85 | 113.22  | 113.91 |
| 1-2.e12548/1/1636  | PREDICTED: nebulin isofon        | 847166512 | XP_01282661 | 14.72   | 13.03  | 71.5    | 65.65   | 14.33   | 0      | 22.93  | 54.13   | 46.95   | 26.98  | 0       | 14.27  |
| 1-2.e24824/1/1485  | --                               | --        | --          | 16.41   | 15.03  | 3.12    | 6.46    | 2.76    | 31.81  | 9.94   | 7.09    | 7.82    | 101.86 | 105.18  | 50.32  |
| 2-3.e43754/2/2456  | PREDICTED: LOW QUALI             | 543714928 | XP_00549874 | 42.22   | 9.04   | 54.29   | 33.2    | 28.98   | 43.2   | 32.79  | 34.6    | 59.52   | 11.2   | 12.4    | 26.24  |
| 1-2.e24232/1/1263  | PREDICTED: protein transp        | 847087082 | XP_01281625 | 0       | 3.9    | 0.53    | 1       | 0       | 2.32   | 0      | 0       | 0       | 9.34   | 16.32   | 0      |
| 1-2.e3100/2/1546   | rCG19955, isoform CRA_a [I       | 149032951 | EDL87792.1  | 2.2     | 0      | 0       | 0       | 0       | 5.57   | 1.31   | 0       | 0.56    | 15.71  | 9.07    | 5.62   |
| 2-3.e52659/1/2150  | PREDICTED: bifunctional 3'       | 831298598 | XP_01268117 | 0.12    | 0      | 0       | 0       | 0       | 0      | 1.32   | 1.52    | 0       | 0      | 0       | 0      |
| 3-6.e5040/1/3392   | PREDICTED: band 4.1-like j       | 847168906 | XP_01280820 | 21.78   | 6.2    | 20.96   | 14.38   | 13.59   | 4.15   | 11.24  | 15.39   | 13.76   | 4.51   | 6.45    | 5.18   |
| 2-3.e26996/1/2078  | vitamin K epoxide reductase      | 55742523  | NP_00100692 | 15.83   | 245.94 | 16.62   | 11.86   | 14.64   | 72.65  | 24.88  | 8.93    | 16.76   | 137.97 | 159.93  | 172.33 |
| 3-6.e15406/1/2790  | glucosidase, alpha; neutral A1   | 148232724 | NP_00109123 | 0       | 0      | 0       | 0       | 0       | 0.69   | 1.8    | 0       | 1.28    | 0      | 0       | 0      |
| 3-6.e8920/1/3848   | PREDICTED: protein CDV3          | 847134819 | XP_01281997 | 12.98   | 11.16  | 8.06    | 3.03    | 11.17   | 18.37  | 6.25   | 4.37    | 4.21    | 0      | 0       | 4.15   |
| 1-2.e13673/7/1307  | PREDICTED: actin, cytoplas       | 795093282 | XP_01181546 | 10.42   | 3.35   | 14.36   | 12.51   | 17.97   | 7.62   | 17.94  | 10.84   | 9.42    | 2.58   | 1.55    | 6.38   |
| 1-2.e25074/1/1720  | --                               | --        | --          | 3.96    | 3.2    | 3.72    | 5.29    | 2.39    | 2.05   | 3.17   | 3.03    | 4.11    | 36.87  | 45.95   | 44.8   |
| 2-3.e20986/6/2085  | PREDICTED: thymopoietin i        | 847109041 | XP_01281420 | 1.26    | 0.79   | 0       | 0.45    | 0       | 0      | 0      | 0       | 0       | 0      | 3.85    | 3.34   |
| 2-3.e2306/20/2235  | 6-4 photolyase [Xenopus lae      | 147906624 | NP_00108142 | 10.53   | 24.12  | 13.89   | 4.71    | 6.36    | 6.23   | 8.02   | 6.69    | 9.85    | 3.86   | 2.31    | 1.73   |
| 2-3.e17398/1/2387  | basigin [Xenopus (Silurana) t    | 89268702  | CAJ83018.1  | 459.77  | 112.91 | 170.79  | 368.9   | 387.88  | 94.65  | 109.55 | 211.18  | 287.74  | 86.25  | 24.7    | 119.24 |
| 1-2.e8938/2/1432   | inositol hexakisphosphate kin    | 62859747  | NP_00101595 | 0.02    | 8.67   | 0       | 0       | 0.49    | 0      | 0      | 0       | 0       | 5.01   | 0       | 7.76   |
| 1-2.e27349/1/1732  | TPA_inf: tropoelastin 2a [Xe     | 296040422 | DAA12508.1  | 2.18    | 0      | 1.04    | 0.93    | 1.17    | 0      | 2.45   | 3.15    | 1.02    | 0      | 0.8     | 0      |
| 2-3.e15881/1/2060  | --                               | --        | --          | 14.83   | 61.72  | 9.21    | 16.28   | 6.6     | 14.42  | 10.85  | 8.43    | 10.81   | 102.9  | 141.85  | 57.15  |
| 2-3.e62964/1/2466  | cyclin I [Xenopus laevis]>gij    | 148228521 | NP_00108357 | 30.8    | 49.67  | 33.89   | 25.43   | 23.3    | 14.39  | 12.07  | 21.29   | 19.8    | 3.88   | 0.79    | 14.21  |
| 1-2.e9731/1/1808   | major facilitator superfamily    | 153792409 | NP_00109335 | 2.25    | 8.96   | 1.92    | 0.14    | 0       | 2.74   | 0      | 1.28    | 1.75    | 0      | 0       | 0      |
| 1-2.e40900/1/1278  | PREDICTED: kelch-like prot       | 301610740 | XP_00293485 | 74.27   | 16.86  | 42.41   | 36.49   | 65.33   | 56.42  | 61.85  | 45.56   | 88.52   | 12.93  | 63.97   | 9      |
| 2-3.e48925/1/2195  | PREDICTED: protein transp        | 301609492 | XP_00293425 | 0       | 3.1    | 2.11    | 2.21    | 2.8     | 1.03   | 5.13   | 1.44    | 2.52    | 1.06   | 0       | 0.41   |
| 3-6.e15016/1/3195  | PREDICTED: myosin-4 [Xer         | 847156920 | XP_01282446 | 0.7     | 0.07   | 2.52    | 1.47    | 1.93    | 0      | 1.2    | 2.36    | 1.8     | 0.16   | 0.21    | 0.56   |
| 2-3.e26922/1/2290  | --                               | --        | --          | 9.48    | 34.27  | 4.92    | 6.12    | 8.42    | 13.06  | 10.5   | 7.66    | 11.71   | 102.92 | 99.2    | 90.13  |
| 1-2.e8269/1/1291   | --                               | --        | --          | 2.73    | 1.68   | 4.32    | 3.88    | 2.32    | 3.81   | 4.89   | 3.98    | 7.14    | 1.03   | 0.86    | 0.92   |
| 1-2.e12187/4/1338  | PREDICTED: nucleolar GTP         | 395539819 | XP_00377186 | 82.91   | 86.59  | 51.9    | 24.74   | 35.07   | 50.82  | 39.62  | 41.86   | 56.43   | 17.87  | 6.88    | 26.58  |
| 2-3.e53140/1/2342  | --                               | --        | --          | 12.02   | 109.24 | 37.72   | 23.05   | 11.79   | 21.67  | 18.46  | 11.59   | 35.55   | 8.08   | 7.05    | 3.15   |
| 1-2.e22200/3/1727  | umps-prov protein, partial [X    | 56789550  | AAH88513.1  | 16.25   | 44.68  | 5.91    | 13.23   | 9.58    | 10.18  | 12.75  | 10.25   | 12.16   | 4.74   | 2.82    | 3.79   |
| 2-3.e23394/3/2655  | PREDICTED: protein Shroor        | 847100721 | XP_01281266 | 2.76    | 7.69   | 1.14    | 1.59    | 2.56    | 2.82   | 0.87   | 2.1     | 2.52    | 15.08  | 12.51   | 32.4   |
| 1-2.e44317/1/1236  | MGC86492 protein [Xenopus        | 147904348 | NP_00108781 | 8.54    | 51.81  | 5.79    | 11.59   | 6.05    | 21.77  | 10.23  | 7.78    | 13.23   | 99.16  | 102.94  | 94.19  |
| 1-2.e16583/2/1367  | ribosomal protein L3-like [X     | 148223643 | NP_00108803 | 2.7     | 3.48   | 2.41    | 1.44    | 2.08    | 3.35   | 2.38   | 6.88    | 4.68    | 0.36   | 2.09    | 0.26   |
| 1-2.e34127/1/1458  | Uroplakin-3a, partial [Colum     | 449273315 | EMC82838.1  | 21.47   | 10.08  | 18.57   | 9.48    | 18.41   | 4.68   | 10.44  | 10.68   | 3.96    | 1.58   | 0.69    | 4.29   |
| 1-2.e13419/1/1831  | PREDICTED: glypican-5-lik        | 847167197 | XP_01282675 | 0       | 0      | 0       | 0       | 0       | 1.07   | 0      | 0       | 0       | 7.72   | 15.64   | 0      |
| 1-2.e21967/8/1387  | serine palmitoyltransferase sr   | 62857651  | NP_00101721 | 2.36    | 0.59   | 0       | 4.89    | 3.78    | 0      | 2.37   | 2.05    | 3.81    | 27.1   | 30.52   | 36.7   |

|                     |                                  |           |             |         |         |         |        |        |        |        |        |        |        |        |        |
|---------------------|----------------------------------|-----------|-------------|---------|---------|---------|--------|--------|--------|--------|--------|--------|--------|--------|--------|
| 2-3.c54284/1/2147   | PREDICTED: myb-binding p         | 512820645 | XP_00491176 | 3.34    | 10.67   | 1.96    | 1.34   | 2.78   | 6.93   | 5.58   | 1.98   | 1.82   | 0.47   | 0.56   | 0.52   |
| 1-2.e17594/1/2370   | Myozenin-1-like [Xenopus la      | 148237556 | NP_00107945 | 377.96  | 35.87   | 546.63  | 489.68 | 358.36 | 319.02 | 769.99 | 423.07 | 943.12 | 319.4  | 343.48 | 249.13 |
| 1-2.c39919/1/1290   | PREDICTED: LOW QUALI             | 637377851 | XP_00812323 | 24.19   | 6.75    | 46.34   | 43.31  | 35.18  | 14.01  | 29.72  | 27.8   | 54.12  | 4.85   | 4.37   | 29.13  |
| 2-3.c23423/1/2433   | PREDICTED: unconventiona         | 847091238 | XP_01282520 | 14.21   | 4.71    | 10.72   | 0      | 11.74  | 10.71  | 6.18   | 8.23   | 8.84   | 2.01   | 5.59   | 0.9    |
| 3-6.e7796/1/4300    | uncharacterized protein LOC      | 148225160 | NP_00108922 | 2.31    | 64.82   | 14.4    | 3.71   | 11.92  | 62.96  | 2.34   | 6.45   | 2.49   | 0      | 0      | 0.74   |
| 2-3.c12775/1/2529   | C4 protein [Xenopus laevis]      | 213626287 | AAI70422.1  | 4.32    | 0.47    | 2.61    | 3.38   | 1.3    | 0.29   | 1.95   | 2.41   | 3.28   | 0.51   | 0.01   | 0.77   |
| 1-2.c4205/2/1195.1  | dual adapter for phosphotyros    | 62751355  | NP_00101572 | 66.17   | 25.34   | 40.21   | 48.11  | 54.34  | 15.64  | 62.03  | 51.8   | 41.39  | 445.21 | 502.94 | 466.44 |
| 2-3.e10474/1/2554   | extracellular sulfatase Sulf-2   | 54020831  | NP_00100566 | 0.97    | 0       | 0       | 0      | 1.12   | 0      | 0.06   | 0.89   | 1.89   | 0      | 0      | 0      |
| 2-3.c59938/1/2047   | --                               | --        | --          | 2.49    | 1.83    | 3.23    | 2.79   | 2.74   | 1.41   | 4.73   | 2.23   | 1.77   | 0.5    | 0      | 0.82   |
| 3-6.e17332/2/3093   | --                               | --        | --          | 0       | 0       | 0       | 0      | 1.24   | 0.07   | 0      | 0      | 0      | 3.81   | 0      | 8.89   |
| 3-6.e18499/1/6403.1 | --                               | --        | --          | 12.13   | 175.49  | 7.55    | 23.32  | 11.05  | 26.2   | 13.44  | 11.81  | 19.61  | 217.38 | 358.59 | 120.13 |
| 1-2.c2558/10/1433   | PREDICTED: telethonin [Xe        | 301622194 | XP_00294041 | 22.57   | 0.94    | 24.46   | 2.9    | 0.32   | 0.66   | 0      | 2.39   | 4.88   | 0      | 0      | 0      |
| 2-3.c7633/1/2691    | --                               | --        | --          | 1.05    | 1.27    | 6.61    | 13.73  | 3.92   | 4.93   | 8      | 4.15   | 13.66  | 1.37   | 2.83   | 3.1    |
| 3-6.e2973/3/3877    | PREDICTED: proline-rich nu       | 224048441 | XP_00219808 | 12.16   | 7.31    | 6.43    | 6.45   | 7.5    | 1.27   | 3.48   | 8.56   | 8.32   | 1.44   | 0.07   | 4.48   |
| 1-2.c35071/2/1356   | PREDICTED: serine/threonin       | 617644733 | XP_00753235 | 5.32    | 16.75   | 1.93    | 2.03   | 2.92   | 3.5    | 0.79   | 1.46   | 0      | 8.51   | 14.73  | 15.93  |
| 1-2.c26807/2/1700   | alpha 1 type I collagen [Rana    | 3242649   | BAA29028.1  | 6.07    | 198.31  | 18.08   | 15.32  | 12.04  | 126.92 | 15.28  | 10.35  | 22.55  | 8.25   | 4.52   | 4.13   |
| 1-2.c6874/4/1447    | PREDICTED: LOW QUALI             | 821485492 | XP_01240543 | 4.38    | 204.6   | 24.12   | 17.6   | 0      | 121.38 | 8.23   | 12.42  | 12.43  | 0      | 2.51   | 6.87   |
| 1-2.c45824/1/1230   | --                               | --        | --          | 1.73    | 13.18   | 3.33    | 3.73   | 4.63   | 4.37   | 3.66   | 2.4    | 3.68   | 31.27  | 45.72  | 62.63  |
| 1-2.c4837/1/1479.1  | PREDICTED: tropomyosin a         | 831547267 | XP_01272688 | 346.98  | 8.66    | 563.83  | 488.96 | 399.62 | 9.28   | 467.48 | 440.67 | 356.01 | 208.09 | 204.9  | 146.94 |
| 1-2.e17851/1/6739   | eukaryotic translation elongat   | 62859813  | NP_00101665 | 1201.02 | 2614.09 | 1029.88 | 806.76 | 734.99 | 1029.2 | 728.04 | 822.23 | 870.92 | 261.12 | 74.27  | 635.72 |
| 1-2.c3575/1/1442    | PREDICTED: LOW QUALI             | 803125841 | XP_00401312 | 16.77   | 1.97    | 13.65   | 18.36  | 24.12  | 13.14  | 13.04  | 14.96  | 14.34  | 4.58   | 1.66   | 6.99   |
| 1-2.c25795/1/4418   | PREDICTED: actin, alpha ca       | 803091489 | XP_00401102 | 132.81  | 100.59  | 431.26  | 530.5  | 83.65  | 130.62 | 489.7  | 457.15 | 223    | 182.66 | 137.77 | 173.58 |
| 2-3.c12430/4/2306   | protein tweety homolog 2 [Xi     | 45361675  | NP_989411.1 | 23.35   | 66.17   | 6.43    | 11.4   | 12.95  | 20.56  | 12.41  | 9.38   | 10.45  | 84.42  | 107.32 | 99.28  |
| 2-3.c14018/1/2514   | PREDICTED: LOW QUALI             | 512836507 | XP_00293476 | 0.53    | 0.48    | 0.89    | 0      | 0      | 0      | 1.19   | 1.09   | 0      | 0      | 0      | 0      |
| 2-3.c20256/1/2003   | --                               | --        | --          | 10.53   | 20.54   | 1.39    | 6.09   | 9.51   | 11.36  | 15.12  | 5.28   | 5.2    | 83.56  | 169.81 | 74.69  |
| 2-3.c2893/1/2597.1  | basic leucine zipper and W2 c    | 147906588 | NP_00108025 | 106.8   | 60.92   | 43.42   | 30.61  | 53.05  | 50.32  | 65.09  | 32.02  | 34.15  | 0.12   | 0      | 42.79  |
| 2-3.c20935/1/2615   | LOC496301 protein, partial [     | 76780301  | AAI06222.1  | 4.46    | 4.8     | 2.47    | 2.46   | 2.36   | 1      | 2.56   | 2.26   | 2.7    | 0.46   | 0.43   | 0.53   |
| 1-2.c22508/1/1458   | tubulin, beta, 2 [Danio rerio]   | 834400287 | NP_00103248 | 119.75  | 0.63    | 67.92   | 34.03  | 23.59  | 71.85  | 30.74  | 47.34  | 30.07  | 13.59  | 1.5    | 25.05  |
| 1-2.c44857/1/1364   | --                               | --        | --          | 0.67    | 5.37    | 0.77    | 2.13   | 0      | 14.08  | 1.27   | 1.27   | 0.85   | 34.62  | 61.72  | 15.08  |
| 2-3.c6620/4/2296    | glutamine-dependent NAD(+)       | 187608643 | NP_00112040 | 4.46    | 2.07    | 3.86    | 5.24   | 3.37   | 2.15   | 2.7    | 3.48   | 3.84   | 0.31   | 0.72   | 1.04   |
| 2-3.c4478/15/2180   | PREDICTED: retinoic acid re      | 301614423 | XP_00293668 | 2.33    | 14.43   | 0       | 2.53   | 3.74   | 3.89   | 2.29   | 0.37   | 0.63   | 11.23  | 11.91  | 16.02  |
| 3-6.e9142/1/3104.2  | --                               | --        | --          | 0.16    | 7.27    | 0       | 2.3    | 1.86   | 4.02   | 1.6    | 2.89   | 2.15   | 27.54  | 30.94  | 25.83  |
| 1-2.c40310/1/1404   | chloride intracellular channel   | 148224931 | NP_00108268 | 2.31    | 0       | 3.46    | 2.41   | 0.12   | 0      | 2.6    | 2.19   | 2.38   | 0      | 0      | 0.39   |
| 3-6.c18822/1/2734   | PREDICTED: myosin-4 [Xet         | 847156920 | XP_01282446 | 0.25    | 0       | 1.59    | 0.96   | 0.72   | 0      | 1.62   | 0.83   | 0.69   | 0.05   | 0      | 0.13   |
| 2-3.c60184/1/2170   | --                               | --        | --          | 0       | 1.32    | 1.6     | 4.04   | 0      | 0      | 5.07   | 0      | 2.33   | 0      | 0      | 0      |
| 2-3.c46375/1/2538   | --                               | --        | --          | 0       | 1.49    | 0.62    | 1.88   | 0.28   | 0.41   | 2.43   | 0.27   | 1.51   | 0      | 0      | 0      |
| 2-3.c2883/1/2560    | eukaryotic translation initiatic | 148237458 | NP_00108006 | 3.74    | 1.24    | 6.85    | 4.21   | 4.77   | 2.08   | 4.1    | 5.84   | 5.02   | 0.64   | 0.44   | 2.93   |
| 2-3.c13541/1/2607   | LOC398149 protein [Xenopus       | 60649448  | AAH91650.1  | 4.99    | 0.85    | 2.02    | 1.96   | 3.91   | 1.08   | 3.95   | 2.67   | 1.02   | 17.92  | 26.29  | 31.92  |
| 1-2.c24789/1/1540   | PREDICTED: ATP synthase          | 564257576 | XP_00626773 | 216.06  | 98.52   | 123.37  | 169.3  | 234.29 | 187.25 | 194.69 | 192.1  | 185.34 | 66.09  | 64.53  | 110.71 |
| 3-6.c4153/1/2908.1  | PREDICTED: ankyrin repeat        | 591350883 | XP_00706985 | 4.4     | 0.29    | 0.18    | 3.91   | 2.88   | 1.52   | 3.39   | 3.68   | 2.09   | 0.08   | 0      | 0.74   |
| 2-3.e15691/1/2295   | --                               | --        | --          | 0.47    | 1.7     | 0.38    | 1.09   | 0.19   | 0.71   | 0.62   | 0.64   | 1.26   | 5.86   | 16.72  | 12.07  |
| 2-3.c46123/1/2302   | --                               | --        | --          | 0.36    | 7.8     | 0.23    | 0.36   | 0.51   | 2.6    | 0.37   | 0.12   | 0.75   | 7.2    | 11.67  | 7.5    |
| 1-2.c30329/1/1717   | --                               | --        | --          | 4.37    | 12.07   | 2.35    | 5.44   | 2.08   | 3.69   | 2.71   | 2.68   | 2.97   | 25.81  | 34.19  | 30.3   |
| 2-3.c62437/2/2508   | PREDICTED: arrestin domai        | 847088847 | XP_01282126 | 1.74    | 1.09    | 1.2     | 0      | 1      | 2.55   | 1.29   | 1.04   | 1.06   | 0      | 0.23   | 0      |
| 1-2.c32859/2/1541   | PREDICTED: periostin isofo       | 560975750 | XP_00621017 | 31.57   | 0.29    | 39.32   | 49.54  | 14.3   | 9.51   | 15.08  | 47.08  | 46.94  | 16.76  | 6.2    | 5.42   |
| 1-2.c39980/1/9175   | reticulon-2 [Xenopus (Silur      | 166795979 | NP_00110773 | 32.16   | 112.86  | 62.71   | 26.41  | 33.17  | 141.62 | 47.35  | 43.12  | 39.04  | 16.14  | 24.22  | 11.47  |
| 2-3.c63476/5/2036   | PREDICTED: adenylyl cycl         | 704180660 | XP_01013526 | 5.43    | 0       | 1.48    | 0      | 1.76   | 0      | 8.42   | 2.07   | 2.41   | 0      | 0.8    | 0      |
| 1-2.e27312/9/1373   | --                               | --        | --          | 73.61   | 50.02   | 153.41  | 108.78 | 5.75   | 23.09  | 123.68 | 86.73  | 6.64   | 3.48   | 0      | 5.76   |
| 1-2.c44631/1/1192   | PREDICTED: neurofilament         | 301617086 | XP_00293797 | 19.6    | 27.88   | 37.83   | 26.89  | 26.41  | 124.53 | 59.98  | 26.98  | 37.48  | 15.53  | 21.7   | 11.41  |
| 2-3.c13843/2/2305   | ras homolog family member        | 148225697 | NP_00107972 | 26.2    | 3.27    | 0.56    | 18.64  | 0.82   | 0.53   | 0      | 17.58  | 0.26   | 62.49  | 58.15  | 67.29  |
| 2-3.c4811/1/2177    | ring finger protein 20, E3 ubi   | 163914497 | NP_00110633 | 0       | 0       | 0       | 0      | 0.33   | 0      | 0      | 0      | 0      | 0      | 2.69   | 2.85   |
| 2-3.c12262/2/2062   | mannosidase, alpha, class 2A     | 148226300 | NP_00108556 | 2.67    | 0.16    | 1.96    | 0      | 2.59   | 1.28   | 0      | 0      | 0      | 2.9    | 1.51   | 0.91   |
| 2-3.c2130/8/2346    | PREDICTED: 5-beta-cholest        | 512849887 | XP_00491563 | 0.69    | 1.14    | 0.28    | 1.89   | 0      | 0.7    | 0.68   | 0.82   | 2.17   | 0      | 0      | 0.12   |
| 1-2.c14950/1/4597   | PREDICTED: keratin, type I       | 697020374 | XP_00957168 | 5.75    | 1.47    | 9.61    | 0      | 0.02   | 0      | 4.66   | 7.83   | 0      | 0      | 0      | 0      |
| 2-3.c54604/1/2355   | --                               | --        | --          | 1.56    | 34.69   | 1.7     | 4.16   | 1.84   | 7.15   | 3.25   | 2.71   | 4.36   | 34.45  | 58.94  | 24.02  |
| 3-6.e14765/1/4012   | PREDICTED: reticulon-4 iso       | 847127949 | XP_01281853 | 37.05   | 6.62    | 32.54   | 20.57  | 25.45  | 3.55   | 14.43  | 21.34  | 17.37  | 8.38   | 3.94   | 9.39   |
| 2-3.c37841/4/2152   | ectonucleoside triphosphate d    | 55742043  | NP_00100675 | 1.15    | 4.12    | 0       | 3.72   | 1.06   | 3.68   | 0.52   | 1.21   | 1.38   | 12.48  | 14.46  | 14.59  |
| 1-2.c45701/1/1902   | twinfilin-2 [Xenopus (Siluran    | 194018662 | NP_00112341 | 129.11  | 7.39    | 37.28   | 26.75  | 74.11  | 18.31  | 125.08 | 56.63  | 39.17  | 10.36  | 34.37  | 13.88  |



|                      |                                 |           |             |        |        |       |        |        |       |        |        |       |        |        |        |
|----------------------|---------------------------------|-----------|-------------|--------|--------|-------|--------|--------|-------|--------|--------|-------|--------|--------|--------|
| 1-2.c11033/1/6975    | muscle creatine kinase [Xeno    | 147899942 | NP_00108007 | 16.79  | 1.48   | 20.42 | 21.5   | 22.36  | 11.4  | 19.33  | 18.2   | 26.34 | 8.31   | 6.2    | 7.96   |
| 3-6.e5889/1/6501     | profilin-2 [Xenopus (Silurana   | 62859423  | NP_00101605 | 12.95  | 21.49  | 16.05 | 10.04  | 7.35   | 7.18  | 7.88   | 11.21  | 4.11  | 2.08   | 0.5    | 3.13   |
| 2-3.e20900/1/2411    | acetyl-CoA acetyltransferase    | 148234082 | NP_00108602 | 20.62  | 1.12   | 1.45  | 2.38   | 1.93   | 0.81  | 13.78  | 12.85  | 0     | 0      | 0.31   | 0.41   |
| 1-2.e5521/1/1688     | tyrosinase-related protein 1 p  | 148223219 | NP_00108045 | 1.37   | 4.01   | 1.63  | 0.75   | 1.26   | 1.01  | 4.75   | 1.09   | 1.3   | 0.23   | 0      | 0      |
| 2-3.e27312/1/2649    | PREDICTED: cationic aminoc      | 847153149 | XP_01282343 | 75.68  | 104.07 | 19.15 | 24.56  | 42.66  | 28.87 | 97.59  | 64.05  | 48.49 | 39.1   | 25.52  | 26.03  |
| 1-2.e10949/6/1831    | PREDICTED: NAD-depende          | 530626779 | XP_00530291 | 27.46  | 32.21  | 19.22 | 24.5   | 21.8   | 20.68 | 12.9   | 22.62  | 25.33 | 5.53   | 5.09   | 12.01  |
| 2-3.e47018/1/2447    | --                              | --        | --          | 1.13   | 0.19   | 0.31  | 0      | 0.23   | 0     | 0      | 0.06   | 0     | 11.17  | 0      | 8.03   |
| 2-3.e44606/5/2291    | PREDICTED: forkhead box f       | 543358692 | XP_00552324 | 0      | 10.14  | 2.8   | 3      | 2.5    | 2.15  | 1.13   | 4.23   | 5.36  | 0.73   | 1.2    | 0      |
| 3-6.e7510/1/7734.2   | --                              | --        | --          | 0.67   | 1.27   | 0.58  | 1.17   | 0.98   | 0.77  | 0.56   | 0.49   | 0.81  | 8.13   | 8.22   | 16.45  |
| 2-3.e27825/1/2538    | PREDICTED: nebulin isofon       | 847166493 | XP_01282660 | 5      | 7.55   | 11.43 | 2.16   | 1.28   | 8.62  | 1.58   | 2.86   | 3.5   | 0.68   | 0.55   | 0.44   |
| 1-2.e22295/1/1424    | --                              | --        | --          | 0.75   | 6.45   | 4.37  | 2.72   | 2.15   | 21.08 | 1.59   | 2.66   | 0.67  | 0      | 0      | 0      |
| 2-3.e52319/1/2076    | myozenin-3 [Xenopus (Silura     | 58332250  | NP_00101127 | 0      | 0      | 0     | 0      | 0      | 0     | 1.9    | 1.08   | 0     | 0      | 0      | 0      |
| 3-6.e18408/1/3097    | PREDICTED: collagen alpha       | 591360730 | XP_00705528 | 1.01   | 30.33  | 5.97  | 0.85   | 0.59   | 3.69  | 0.44   | 2.28   | 3.54  | 0.05   | 0.47   | 0      |
| 1-2.e48433/1/1581    | PREDICTED: nucleolar com        | 847148668 | XP_01282256 | 5.23   | 14.93  | 3.55  | 3.67   | 3.92   | 7.23  | 6.43   | 3.32   | 3.57  | 0.35   | 1.32   | 0.9    |
| 2-3.e33718/1/2168.-- | --                              | --        | --          | 0.78   | 0      | 0     | 0.53   | 0      | 0     | 0      | 0      | 0     | 13.43  | 12.55  | 0      |
| 1-2.e25899/1/1338    | --                              | --        | --          | 1.72   | 64.14  | 1.15  | 3.03   | 1.54   | 5.8   | 0.9    | 1.84   | 3.91  | 28.03  | 47.97  | 27.02  |
| 1-2.e39070/1/3637.   | fructose bisphosphate aldol     | 98979411  | ABF60004.1  | 47.52  | 0.29   | 28.07 | 42.13  | 32.29  | 4.29  | 33.51  | 35.11  | 40.9  | 17.3   | 13.01  | 11.61  |
| 1-2.e22972/1/1524    | --                              | --        | --          | 7.81   | 6.56   | 20.41 | 2.36   | 30.13  | 2.9   | 18.07  | 6.09   | 21.61 | 4.48   | 6.23   | 4.6    |
| 1-2.e49176/1/1504    | --                              | --        | --          | 3.99   | 19.3   | 1.74  | 5.48   | 3.15   | 9.12  | 2.56   | 0      | 0     | 10.99  | 46.48  | 92.42  |
| 2-3.e14492/1/2202    | MLK-like mitogen-activated      | 525507075 | NP_00126758 | 10.87  | 8.58   | 10.38 | 7.5    | 9.53   | 17.14 | 7.72   | 9.21   | 7.96  | 4.27   | 3.58   | 1.25   |
| 3-6.e17376/1/2728    | myosin, heavy chain 4, skelet   | 47575800  | NP_00100124 | 4.23   | 0.18   | 7.93  | 7.41   | 5.65   | 0.04  | 4.33   | 8.49   | 6.44  | 2.45   | 2.36   | 1.92   |
| 2-3.e13861/1/1947    | --                              | --        | --          | 8.25   | 87.35  | 4.84  | 6.75   | 2.01   | 15.87 | 4.75   | 3.74   | 6.13  | 50.13  | 58.89  | 32.23  |
| 1-2.e48758/1/1648    | --                              | --        | --          | 402.57 | 12.5   | 65.68 | 127.14 | 224.53 | 5.52  | 319.03 | 336.05 | 260   | 148.72 | 111.89 | 144.06 |
| 1-2.e7884/1/2480.2   | Homogentisate 1,2-dioxygen      | 677297600 | KFP80028.1  | 0      | 7.23   | 9.58  | 0.56   | 1.37   | 4.22  | 11.32  | 0.66   | 4.33  | 0.08   | 0      | 0      |
| 2-3.e40208/1/2528    | --                              | --        | --          | 8.07   | 4.67   | 2.18  | 1.9    | 2.55   | 1.16  | 8.98   | 7      | 2     | 2.68   | 0.88   | 0.2    |
| 3-6.e13212/1/3747    | Ca2+-ATPase 1 [Rana clamit      | 12055497  | CAC20853.1  | 3.01   | 0.61   | 1.41  | 1.48   | 3.06   | 1.43  | 2.09   | 2.19   | 1.99  | 0      | 0.37   | 0.55   |
| 3-6.e15080/1/2723    | --                              | --        | --          | 0.2    | 2.42   | 0.12  | 0.99   | 1.51   | 0.49  | 0.98   | 0.28   | 0.2   | 5.88   | 9.49   | 5.36   |
| 2-3.e56093/1/1951    | WD repeat and SOCS box-co       | 45361625  | NP_989387.1 | 6.02   | 28.35  | 9.79  | 5.93   | 8.47   | 17.83 | 10.01  | 9.57   | 9.59  | 3.4    | 3.06   | 3.32   |
| 2-3.e21000/4/2668    | --                              | --        | --          | 35.62  | 55.29  | 35.52 | 21.76  | 25.44  | 50.12 | 33.03  | 31.83  | 39.54 | 7.3    | 23.18  | 14.79  |
| 1-2.e41371/1/1189    | PREDICTED: keratin, type II     | 512822642 | XP_00293578 | 165.35 | 156.94 | 428.8 | 289.94 | 0      | 93.17 | 554.28 | 74.85  | 258.8 | 15.55  | 12.74  | 22.54  |
| 1-2.e46748/2/1769    | --                              | --        | --          | 0.55   | 6.94   | 3.25  | 0      | 0      | 29.26 | 16.71  | 0      | 5.66  | 0      | 0      | 0      |
| 1-2.e14135/6/1641    | BCL2/adenovirus E1B 19 kD       | 62751435  | NP_00101585 | 9.04   | 2.92   | 6.29  | 6.69   | 11.32  | 0.41  | 5.37   | 9.56   | 5.4   | 0      | 0      | 4.86   |
| 1-2.e5895/1/1586     | --                              | --        | --          | 4.23   | 30.58  | 3.91  | 4.04   | 2.94   | 12.28 | 4.93   | 3.62   | 6.41  | 59.54  | 41.68  | 42.73  |
| 3-6.e16222/2/2954    | PREDICTED: putative pre-m       | 591366635 | XP_00705817 | 25.07  | 51.18  | 11.86 | 10.43  | 8.12   | 12.73 | 9.53   | 12.17  | 5.67  | 3.44   | 4.33   | 1.67   |
| 1-2.e36886/1/1315    | PREDICTED: junctophilin-2       | 557262533 | XP_00601678 | 23.23  | 15.5   | 57.39 | 31.81  | 0.01   | 36.1  | 15.12  | 31.45  | 24.94 | 11.75  | 6.62   | 8.85   |
| 1-2.e19359/2/1645    | carboxymethylenebutenolida      | 148233964 | NP_00108826 | 0      | 9.14   | 1.64  | 4.11   | 1.03   | 1.71  | 7.03   | 3.44   | 4.54  | 0      | 2.36   | 1.11   |
| 2-3.e23983/1/2290.-- | --                              | --        | --          | 0      | 0      | 2.09  | 0      | 0.18   | 0     | 0      | 0      | 0     | 9.5    | 10.38  | 0.19   |
| 3-6.e17185/4/2926    | myosin heavy chain, partial [   | 4249701   | AAD13772.1  | 0.11   | 0      | 1.65  | 1.25   | 0.43   | 0     | 2.08   | 0.46   | 0.78  | 0.06   | 0.13   | 0.06   |
| 3-6.e15150/1/3265    | PREDICTED: ceruloplasmin        | 301615846 | XP_00293737 | 1.01   | 12.91  | 1.25  | 0.39   | 0.94   | 2.81  | 0.68   | 1.18   | 1     | 0.2    | 0.04   | 0      |
| 1-2.e40819/1/1483    | --                              | --        | --          | 46.94  | 16.63  | 59.65 | 34.66  | 41.92  | 4.75  | 87.07  | 24.82  | 78.17 | 32.27  | 24.47  | 7.85   |
| 3-6.e2662/14/3358    | nuclear factor, erythroid 2-lik | 147900041 | NP_00108001 | 136.79 | 26.92  | 45.06 | 76.95  | 103.53 | 13.79 | 117.07 | 101.9  | 87.14 | 34.32  | 29.41  | 66.24  |
| 2-3.e34853/1/2318    | --                              | --        | --          | 33.1   | 4.67   | 49.13 | 85.24  | 88.88  | 9.75  | 96.42  | 67.23  | 87.15 | 36.16  | 5.38   | 53.34  |
| 2-3.e1588/34/2495    | PREDICTED: cyclin-L2 isofi      | 847146354 | XP_01282212 | 16.43  | 27.69  | 3.91  | 7.3    | 3.64   | 7.5   | 8.53   | 8.13   | 11.98 | 0.08   | 5.77   | 4.49   |
| 1-2.e36883/1/9679    | MGC84445 protein [Xenopus       | 51703940  | AAH81189.1  | 9.08   | 10.42  | 9.38  | 2.44   | 2.91   | 0     | 8.23   | 2.85   | 1.65  | 0      | 0      | 0      |
| 2-3.e42563/1/2383    | cellular retinoic acid-binding  | 25453404  | NP_058940.1 | 3.32   | 134.33 | 6.07  | 1.62   | 7.01   | 22.15 | 42.07  | 14.77  | 33.1  | 3.97   | 0      | 26.96  |
| 2-3.e29868/1/2078    | --                              | --        | --          | 23.24  | 2.66   | 28.27 | 31.03  | 26.78  | 4.4   | 44.96  | 21.52  | 40.55 | 27.43  | 6.14   | 6.34   |
| 3-6.e7728/1/3338     | PREDICTED: myosin-3 [Xer        | 847172863 | XP_01280963 | 1.95   | 7.04   | 4.12  | 0.64   | 1.45   | 74.6  | 1.57   | 1.87   | 1.68  | 0.96   | 0      | 0      |
| 1-2.e2245/23/1297    | LOC548400 protein, partial [    | 59861981  | AAH90369.1  | 318.1  | 37.5   | 44.81 | 61.74  | 100.3  | 18.6  | 86.09  | 78.23  | 63.44 | 501.54 | 694.05 | 754.53 |
| 2-3.e10262/2/2337    | transcription factor Dp-1 [Xei  | 148222844 | NP_00108805 | 0.46   | 0      | 0     | 0.55   | 0      | 1.91  | 0.39   | 1.46   | 0.44  | 0      | 0      | 0      |
| 2-3.e54510/1/2290    | 4-aminobutyrate aminotransf     | 189230071 | NP_00112152 | 2.93   | 0      | 1.2   | 2.68   | 5.49   | 0.31  | 5.99   | 6.5    | 5.06  | 0.87   | 1.9    | 2.49   |
| 3-6.e7775/1/3739     | PREDICTED: bcl-2-like prot      | 847177164 | XP_00492107 | 30.19  | 10.66  | 19.82 | 33.62  | 19.57  | 9.42  | 15.18  | 15.89  | 20.52 | 5.61   | 2.87   | 11.63  |
| 2-3.e4393/1/2332     | --                              | --        | --          | 2.55   | 53.44  | 3.32  | 2.94   | 2.92   | 16.72 | 2.2    | 2.86   | 4.44  | 32.71  | 14.43  | 43.65  |
| 2-3.e7650/1/2206     | --                              | --        | --          | 0      | 9.9    | 3.29  | 0.03   | 4.33   | 3.73  | 0      | 0      | 0     | 2.93   | 2.72   | 0      |
| 2-3.e9525/1/2034     | PREDICTED: myotubularin-        | 847089882 | XP_01282302 | 2.42   | 3.37   | 0.92  | 3.35   | 0.78   | 3.22  | 6.05   | 1.47   | 2.05  | 34.75  | 30.81  | 26.97  |
| 2-3.e7319/1/2423     | cGMP-dependent 3',5'-cyclic     | 118404742 | NP_00107260 | 0      | 0      | 0     | 0.96   | 0      | 0     | 1.45   | 3.09   | 0.2   | 0      | 0      | 0      |
| 2-3.e35193/1/2278    | --                              | --        | --          | 6.2    | 0.5    | 0.06  | 31.38  | 7.84   | 1.3   | 14.46  | 9.97   | 13.29 | 7.23   | 1.25   | 2.64   |
| 1-2.e14512/1/1673    | PREDICTED: cytochrome P-        | 512845316 | XP_00293364 | 3      | 0      | 0     | 1.59   | 1.69   | 1.04  | 2.44   | 2.62   | 1.49  | 0      | 0.67   | 0      |
| 3-6.e3167/1/3572     | PREDICTED: myosin-bindin        | 564233250 | XP_00626095 | 0.38   | 0.18   | 31.44 | 0      | 0      | 0     | 14.96  | 3.58   | 0     | 0      | 0      | 0      |

|                    |                                |           |             |        |        |        |        |        |        |        |        |        |        |        |        |
|--------------------|--------------------------------|-----------|-------------|--------|--------|--------|--------|--------|--------|--------|--------|--------|--------|--------|--------|
| 1-2.c52466/1/1252  | LOC397919 protein [Xenopus]    | 213625217 | AAI70091.1  | 112.74 | 553.45 | 89.37  | 94.3   | 112.85 | 258.94 | 121.92 | 80.87  | 112.1  | 50     | 37.74  | 44.53  |
| 1-2.e17928/1/1743  | --                             | --        | --          | 0      | 0.18   | 0      | 0      | 0      | 0.22   | 0      | 0      | 0      | 0.49   | 6.35   | 3.1    |
| 2-3.e42443/1/2247  | --                             | --        | --          | 2.07   | 16.25  | 0.75   | 1.7    | 1.77   | 4.81   | 1.48   | 1.25   | 1.85   | 17.28  | 29.52  | 11.58  |
| 3-6.e16028/1/2660  | breast cancer anti-estrogen re | 147906605 | NP_00108515 | 0.21   | 0.62   | 0.9    | 0      | 0      | 1.36   | 3.57   | 2.38   | 1.21   | 0      | 0.91   | 0.54   |
| 3-6.e18431/1/2995  | PREDICTED: cardiomyopath       | 512810079 | XP_00491044 | 27.63  | 4.01   | 37.87  | 37.76  | 43.17  | 5.53   | 32.45  | 45.35  | 34.35  | 13.79  | 7.54   | 25.44  |
| 1-2.e18863/1/1308  | --                             | --        | --          | 5.9    | 7.89   | 1.1    | 2.14   | 2.26   | 5.84   | 4.45   | 1.67   | 2.67   | 31.87  | 43.53  | 20.61  |
| 1-2.c1919/3/1/1776 | zinc finger, AN1-type domain   | 148234811 | NP_00108035 | 9.26   | 28.66  | 4.48   | 7      | 7.01   | 4.07   | 0      | 0      | 5.46   | 22.81  | 11.98  | 23.78  |
| 1-2.e2539/4/1292   | --                             | --        | --          | 39.65  | 147.73 | 57.18  | 31.3   | 9.21   | 13.75  | 19.61  | 39.06  | 55.5   | 25.74  | 5.68   | 10.36  |
| 1-2.e47206/12/1506 | PREDICTED: calsequestrin-1     | 821480671 | XP_01240345 | 277.22 | 31.52  | 281.17 | 293.29 | 428.37 | 381.12 | 460.75 | 482.01 | 424.73 | 229.91 | 219.26 | 175.15 |
| 2-3.e42752/2/1879  | PREDICTED: LOW QUALI           | 695159509 | XP_00950788 | 1.48   | 0      | 0.79   | 0      | 1.09   | 2.63   | 0      | 0      | 0      | 0      | 3.05   | 4.86   |
| 1-2.e32947/4/1746  | --                             | --        | --          | 9.03   | 7.67   | 4.1    | 1.47   | 0.48   | 1.22   | 4.8    | 4.74   | 8.26   | 2.41   | 1.76   | 0.66   |
| 2-3.e46796/1/2073  | --                             | --        | --          | 4.43   | 20.31  | 2.81   | 2.91   | 2.38   | 3.15   | 4.47   | 1.82   | 2.15   | 29.42  | 32.9   | 30.85  |
| 1-2.e52372/7/1426  | tripartite motif containing 54 | 147905260 | NP_00108505 | 487.5  | 34.02  | 188.75 | 250.28 | 334.06 | 44.67  | 260.29 | 298.99 | 300.56 | 93     | 239.23 | 77.1   |
| 1-2.e51455/108/162 | glycogenin 1 [Xenopus laevis]  | 148232896 | NP_00109023 | 355.71 | 25.72  | 133.37 | 117.95 | 154.52 | 46.01  | 76.27  | 152.6  | 119.96 | 22.51  | 98     | 44.47  |
| 2-3.e23256/1/2186  | PREDICTED: myb-related tr      | 847129062 | XP_0128188C | 0.49   | 15.1   | 0.27   | 0.35   | 0.31   | 1.33   | 0      | 0      | 0.29   | 6.04   | 24.36  | 8.26   |
| 3-6.e18604/1/3111  | myosin heavy chain, partial [l | 4249701   | AAID13772.1 | 2.09   | 0      | 3.93   | 3.98   | 3.38   | 0      | 2.35   | 4.28   | 3.12   | 0.78   | 1.18   | 0.88   |
| 3-6.e15710/1/4011  | PREDICTED: DNA damage-         | 847123732 | XP_0029376E | 13.56  | 13.48  | 10.68  | 10.8   | 16.96  | 10.89  | 9.99   | 12.84  | 9.3    | 3.53   | 1.14   | 7.56   |
| 2-3.e27849/1/2268  | ras homolog family member ,    | 148225697 | NP_00107972 | 1.51   | 1.32   | 0.15   | 1.38   | 0.15   | 0.27   | 0.33   | 0.8    | 0      | 4.68   | 9.13   | 6.5    |
| 1-2.c13042/1/1557  | PREDICTED: coiled-coil do      | 641766364 | XP_00816802 | 0      | 0      | 0      | 0      | 0      | 1.86   | 0      | 0      | 0      | 4.39   | 0.54   | 2.58   |
| 1-2.e25020/2/1328  | Sprouty2 [Xenopus (Silurana    | 52352549  | AAU43764.1  | 1.18   | 0      | 0      | 0      | 0.34   | 7.03   | 0      | 0      | 0      | 6.74   | 4.98   | 0      |
| 2-3.c3410/1/2051.2 | --                             | --        | --          | 24.36  | 14.57  | 17.18  | 7.81   | 13.77  | 5.32   | 20.77  | 19.33  | 24.28  | 8.71   | 3      | 4.72   |
| 2-3.e8815/1/2097   | --                             | --        | --          | 2.61   | 71.66  | 2.57   | 10.45  | 1.65   | 0      | 2.4    | 4.36   | 6.33   | 43.26  | 50.25  | 32.92  |
| 2-3.e39831/1/2085  | PREDICTED: kelch-like prot     | 847095166 | XP_01281105 | 0.35   | 5.27   | 0.66   | 1.88   | 1.98   | 2.06   | 0      | 0.86   | 0      | 5.49   | 7.26   | 6.39   |
| 2-3.e55108/1/2351  | --                             | --        | --          | 1.41   | 10.73  | 6.01   | 4.33   | 2.26   | 43.34  | 2.68   | 3.27   | 7.35   | 0      | 2.73   | 0.77   |
| 1-2.e3245/1/1571   | PREDICTED: serine/threonin     | 597759458 | XP_0072414C | 0      | 0      | 0      | 0      | 0.02   | 0      | 7.03   | 2.69   | 0      | 0      | 0      | 0      |
| 1-2.e10915/1/1069C | PREDICTED: LOW QUALI           | 558146048 | XP_00611955 | 2.76   | 0.39   | 0      | 0.02   | 0      | 0.36   | 0      | 2.1    | 3.01   | 0      | 0      | 0.06   |
| 2-3.e15520/6/2195  | PREDICTED: nuclear recept      | 694856246 | XP_00946965 | 1.34   | 0.92   | 0.46   | 0.82   | 0      | 2.33   | 0.12   | 0.29   | 0.13   | 3.18   | 7.1    | 3.87   |
| 3-6.e4976/1/3855   | PREDICTED: nebulin isofor      | 847166506 | XP_01282661 | 0      | 0      | 3.31   | 0.4    | 0      | 1.54   | 1.96   | 1.48   | 0.27   | 0      | 0      | 0.29   |
| 3-6.e12875/10/3715 | RecName: Full=Sarcoplasmic     | 9789732   | Q92105.1    | 3.07   | 0.11   | 3.76   | 5.46   | 3.76   | 2.6    | 2.78   | 4.4    | 3.41   | 1.83   | 0.38   | 1.09   |
| 2-3.e42381/1/2121  | Hypothetical protein EH28_0    | 808880242 | KKF28166.1  | 1.76   | 32.32  | 1.31   | 5.41   | 1.09   | 4.02   | 1.5    | 1.87   | 3.26   | 37.03  | 30.47  | 18.26  |
| 1-2.e29265/1/1451  | --                             | --        | --          | 3.42   | 22.25  | 1.35   | 3.39   | 1.02   | 2.63   | 2.15   | 1.76   | 2.49   | 23.18  | 32.05  | 18.39  |
| 2-3.e43926/1/2676  | Chain A, Catalytic And Struc   | 21730859  | ILUW        | 111.01 | 96.51  | 109.69 | 99.19  | 106.09 | 136.27 | 122    | 105.68 | 111.78 | 51.86  | 46.69  | 35.28  |
| 2-3.e52694/1/2565  | PREDICTED: E3 ubiquitin-p      | 847087434 | XP_01281732 | 0      | 3.77   | 0.09   | 0      | 0.55   | 0      | 0      | 0      | 1.29   | 0.62   | 2.13   | 0      |
| 2-3.e55630/1/2547  | PREDICTED: pre-mRNA-pn         | 847162749 | XP_01282561 | 0      | 0      | 0      | 0      | 0.49   | 0.61   | 0      | 1.02   | 0.86   | 0      | 0      | 0      |
| 2-3.e16746/1/2131  | --                             | --        | --          | 1.43   | 14.9   | 1.28   | 1.03   | 0.76   | 7.84   | 2.04   | 1.36   | 2.38   | 15.68  | 15.9   | 28.11  |
| 2-3.e39688/1/2478  | cat eye syndrome chromosom     | 58331875  | NP_00101108 | 1.26   | 0.99   | 0.37   | 0.35   | 0.59   | 0.1    | 1.68   | 0.85   | 0.6    | 0.14   | 0      | 0      |
| 3-6.e14023/1/3707  | PREDICTED: calcium chann       | 557294828 | XP_00602984 | 47     | 8.47   | 33.13  | 49.02  | 79.58  | 4.48   | 46.91  | 42.62  | 55.84  | 14.09  | 13.86  | 33.24  |
| 3-6.e3245/2/3337   | SH3 domain-binding protein     | 349501002 | NP_989213.2 | 0.7    | 5.56   | 1.76   | 0.18   | 3.56   | 0      | 1.22   | 0.65   | 0      | 0      | 0      | 0      |
| 1-2.e25677/1/1638  | Unknown (protein for IMAG      | 197246590 | AAI68801.1  | 0      | 0      | 1.39   | 0.16   | 0      | 0      | 0      | 0      | 0      | 0      | 4.6    | 3.77   |
| 1-2.c30420/1/1364  | --                             | --        | --          | 1.42   | 13.91  | 0      | 4.53   | 0.09   | 5.61   | 6.59   | 4.16   | 1.11   | 0.99   | 0.67   | 0      |
| 1-2.e13095/1/1686  | uncharacterized protein LOC    | 351542170 | NP_0010882E | 25.61  | 21.71  | 32.73  | 25.36  | 29.29  | 21.52  | 26.19  | 31.1   | 29.29  | 13.85  | 12.01  | 10.06  |
| 2-3.e6458/1/2667.1 | --                             | --        | --          | 12.01  | 1.52   | 13.07  | 8.79   | 9.87   | 5.44   | 1.87   | 0.84   | 7.03   | 20.34  | 24.79  | 42.76  |
| 3-6.e15817/1/4121  | PREDICTED: nidogen-2 [Tri      | 471361161 | XP_00437114 | 1.84   | 46.44  | 10.93  | 4.37   | 4.24   | 21.47  | 0.83   | 2.59   | 3.28   | 0.54   | 0.11   | 0.73   |
| 2-3.e1868/17/2266  | PREDICTED: adenosine kin       | 874462866 | XP_01295145 | 5.42   | 7.07   | 3.86   | 4.38   | 5.49   | 1.99   | 4.72   | 3.35   | 3.46   | 1.08   | 0      | 1.51   |
| 1-2.e48187/2/1389  | LOC398623 protein, partial [   | 32450751  | AAH54264.1  | 33.75  | 35.72  | 24.61  | 25.21  | 18.16  | 12.38  | 27.38  | 29.66  | 25.69  | 0      | 8.5    | 21.89  |
| 1-2.e7315/1/1789   | --                             | --        | --          | 9.75   | 33.18  | 15.39  | 15.11  | 16.74  | 45.17  | 24.1   | 18.03  | 13.3   | 5.11   | 0.57   | 13.65  |
| 2-3.e40509/1/2336  | --                             | --        | --          | 0      | 0      | 1.1    | 0      | 2.14   | 0      | 1.73   | 0.93   | 0      | 0      | 0      | 0      |
| 1-2.e2118/33/1787  | aldose reductase [Xenopus (S   | 58331962  | NP_00101113 | 14.95  | 92.05  | 34.51  | 37.43  | 36.7   | 72.24  | 35.62  | 32.47  | 30.15  | 14.3   | 6.71   | 18.32  |
| 1-2.e45934/1/1325  | --                             | --        | --          | 18.25  | 14.84  | 22.26  | 12.63  | 15.55  | 3.11   | 16.66  | 8.26   | 15.33  | 2.75   | 4.79   | 0.96   |
| 2-3.e48791/1/2648  | PREDICTED: metastasis-ass      | 512877662 | XP_0049192E | 1.13   | 10.66  | 1.18   | 0.56   | 4.73   | 0      | 0      | 1.08   | 2.12   | 0      | 0      | 0      |
| 1-2.e2462/2/1377   | --                             | --        | --          | 2.41   | 89.88  | 1.62   | 6.46   | 4.48   | 45.11  | 8.84   | 4.12   | 4.6    | 70.19  | 49.9   | 163.61 |
| 1-2.e36725/1/1635  | SH3 and cysteine-rich domai    | 55926168  | NP_0010075C | 14.05  | 33.16  | 23.8   | 9.58   | 15.34  | 51.64  | 18.02  | 15.78  | 13.07  | 5.84   | 0.25   | 9.87   |
| 3-6.e4989/1/3762   | sarcoplasmic/endoplasmic ret   | 383511148 | AFH40438.1  | 10.58  | 0      | 7.82   | 8.02   | 17.21  | 10.07  | 9.48   | 11.75  | 9.57   | 3.03   | 1.49   | 7.22   |
| 2-3.e47277/1/2145  | --                             | --        | --          | 0      | 0      | 0      | 4.82   | 0.17   | 0      | 0      | 10.79  | 6.8    | 0      | 0      | 0.16   |
| 2-3.e11775/5/2064  | 55 kDa erythrocyte membran     | 56118338  | NP_00100815 | 4.43   | 0.99   | 0.45   | 0.24   | 0.49   | 0.34   | 0.8    | 2.36   | 0.4    | 0      | 0      | 0      |
| 1-2.e22240/1/1719  | PREDICTED: ribosomal RN.       | 432843220 | XP_00406557 | 3.32   | 6.78   | 5.87   | 0      | 0.54   | 3.33   | 4.49   | 0      | 3.01   | 0      | 0      | 0      |
| 1-2.c30016/1/1498  | --                             | --        | --          | 10.6   | 14.65  | 10.53  | 7.49   | 5.63   | 2.98   | 3.48   | 6.56   | 10.19  | 1.8    | 0.17   | 0.88   |
| 2-3.e6918/4/2294   | PREDICTED: matrilin-4 isof     | 512873848 | XP_00491871 | 0.75   | 4.13   | 2.45   | 3.55   | 0.92   | 0.43   | 0.76   | 1.41   | 3.28   | 0.55   | 0      | 0      |

|                    |                                 |           |             |        |         |        |        |        |        |        |        |        |        |        |        |
|--------------------|---------------------------------|-----------|-------------|--------|---------|--------|--------|--------|--------|--------|--------|--------|--------|--------|--------|
| 1-2.c11418/2/1526  | --                              | --        | --          | 12.49  | 12.74   | 21.85  | 4.89   | 8.19   | 2.21   | 4.71   | 9.96   | 14.27  | 3.74   | 6.37   | 0      |
| 1-2.c39487/1/1359  | PREDICTED: sodium/hydrog        | 847167859 | XP_01282701 | 0.99   | 4.56    | 0.53   | 0.62   | 0      | 1.22   | 0.47   | 0      | 1.8    | 13.8   | 14.95  | 7.52   |
| 1-2.c41168/1/1415  | --                              | --        | --          | 0.45   | 0       | 0.63   | 0.65   | 0.11   | 0.28   | 0.56   | 0      | 0.36   | 5.64   | 9.67   | 5.92   |
| 1-2.c52394/5/1494  | vdac1 protein [Xenopus (Silu    | 138520005 | AAI35546.1  | 40.37  | 45.94   | 49.43  | 45.59  | 42.77  | 74.62  | 80.93  | 54.48  | 67.24  | 38.68  | 31.7   | 18.8   |
| 3-6.e18314/1/3879  | pentraxin 3, long precursor [   | 148226508 | NP_00109115 | 1.81   | 0.44    | 3.46   | 1.2    | 1.38   | 0.12   | 1.29   | 0.81   | 1.28   | 0      | 0.22   | 0.25   |
| 1-2.c38229/1/1714  | gltscr2-prov protein, partial [ | 56789334  | AAH88785.1  | 1.92   | 2.09    | 0      | 0      | 4.96   | 13.93  | 0      | 0      | 0      | 3.45   | 0      | 3.11   |
| 2-3.c24341/1/2050  | --                              | --        | --          | 1.88   | 31.61   | 1.41   | 2.94   | 1.19   | 6.31   | 3.29   | 2.03   | 3.82   | 29.7   | 53.3   | 21.63  |
| 1-2.c24544/1/1472  | --                              | --        | --          | 0      | 0       | 0      | 0.5    | 0      | 0      | 0      | 0      | 0      | 1.19   | 3.57   | 2.91   |
| 2-3.c33937/1/2356  | PREDICTED: N-acetylgalact       | 301608268 | XP_0029337C | 3.12   | 0       | 0.92   | 0      | 0.42   | 0      | 0      | 1.26   | 0.97   | 0      | 0      | 0      |
| 1-2.c49810/2/1367  | muscle creatine kinase [Xeno    | 147899942 | NP_00108007 | 1.69   | 0       | 4.25   | 6.34   | 4.09   | 3.44   | 3.91   | 7.66   | 2.67   | 0      | 1.64   | 0.63   |
| 1-2.c20748/1/1825  | PREDICTED: transmembran         | 847095053 | XP_01281107 | 2.37   | 5.4     | 0.96   | 3.12   | 2.26   | 1.99   | 4.01   | 4.47   | 1.73   | 0.44   | 0.45   | 1.04   |
| 1-2.c22375/8/1504  | PREDICTED: uncharacterize       | 768435294 | XP_01155908 | 9.33   | 64.27   | 10.09  | 4.19   | 14.56  | 43.87  | 9.35   | 5.7    | 8.68   | 0      | 2.25   | 3.96   |
| 2-3.c19749/1/1999  | PREDICTED: lysosomal alpi       | 512873200 | XP_00293256 | 0      | 1.42    | 1.26   | 0      | 2.65   | 0.31   | 1.71   | 0.99   | 0      | 0      | 0      | 0      |
| 1-2.c43050/1/1553  | Geneb-a protein [Xenopus lac    | 213623820 | AAI70263.1  | 0      | 6.72    | 0      | 0      | 3.03   | 1.17   | 0      | 0.14   | 22.91  | 4.08   | 39.98  |        |
| 1-2.c7763/2/1119   | PREDICTED: cytosolic non-       | 591359345 | XP_00705465 | 51.14  | 0       | 7.18   | 46.92  | 72.6   | 0.08   | 39.01  | 50.99  | 36.91  | 309.27 | 282.3  | 479.34 |
| 2-3.c20139/1/2023  | --                              | --        | --          | 0.51   | 5       | 1.16   | 0.34   | 1.59   | 3.44   | 1.58   | 0.56   | 0.7    | 13.35  | 10.78  | 11.24  |
| 1-2.c49121/1/1455  | PREDICTED: NAD kinase 2         | 847088841 | XP_01282125 | 0      | 0       | 0      | 0.48   | 0      | 0      | 0      | 0      | 0      | 3.59   | 3.68   | 0.43   |
| 1-2.c50205/1/1671  | PREDICTED: cellular nuclei      | 594662064 | XP_00717923 | 95.43  | 181.71  | 75.84  | 70.47  | 70.4   | 259.21 | 93.54  | 64.13  | 71.02  | 31.41  | 39.33  | 30.31  |
| 3-6.c14757/1/2938  | --                              | --        | --          | 3.55   | 7.36    | 1.43   | 3.07   | 1.6    | 3.36   | 3.29   | 2.07   | 2.84   | 46.26  | 58.84  | 37.36  |
| 1-2.c1958/39/1177  | nucleolar protein NO38 [Xen     | 147902126 | NP_0010797E | 390.58 | 879.25  | 260.23 | 235.75 | 210.17 | 337.34 | 273.83 | 254.25 | 272.19 | 97.14  | 149.65 | 119.74 |
| 1-2.c41495/1/5068  | PREDICTED: fructose-bisph       | 530658308 | XP_00531466 | 43.7   | 0       | 19.91  | 31.05  | 27.13  | 1.94   | 17.36  | 26.26  | 29.76  | 10.93  | 7.58   | 8.69   |
| 2-3.c10907/2/2583  | gsn protein [Xenopus (Silura)   | 159155320 | AAI54876.1  | 19.24  | 42.84   | 20.24  | 17.37  | 19.15  | 20.14  | 11.26  | 11.14  | 19.37  | 7.83   | 0.55   | 7.38   |
| 3-6.e14123/1/3297  | PREDICTED: sialomucin cor       | 73973725  | XP_532256.2 | 0.31   | 0       | 0      | 0.28   | 11.14  | 5.11   | 7.84   | 6.03   | 5.74   | 5.08   | 2.61   | 0      |
| 2-3.c57408/1/2154  | eukaryotic translation initiat  | 148237458 | NP_00108006 | 16.8   | 0.65    | 9.43   | 10.8   | 7.14   | 1.14   | 8.14   | 10.71  | 8.77   | 0.66   | 9.49   | 1.18   |
| 2-3.c35589/1/2062  | hypothetical protein L798_06    | 646716259 | KDR19588.1  | 1.71   | 15.02   | 1.86   | 3.88   | 1.39   | 2.75   | 2.2    | 1.2    | 2.58   | 34.12  | 54.25  | 15.74  |
| 3-6.c8209/1/3015.1 | --                              | --        | --          | 1.29   | 0       | 4.55   | 12.95  | 10.28  | 4.68   | 16.18  | 9.48   | 14.49  | 6.21   | 2.4    | 5.56   |
| 2-3.c34660/1/2540  | eukaryotic translation initiat  | 148232020 | NP_00108075 | 0      | 0.93    | 0.06   | 1.72   | 0.44   | 0.69   | 0      | 0      | 1.8    | 0      | 2.41   |        |
| 1-2.c39887/1/1748  | PREDICTED: LOW QUALI            | 548522118 | XP_00569813 | 7.19   | 4.15    | 8.53   | 4.83   | 4.31   | 4.39   | 2.2    | 5.06   | 5.58   | 0      | 0.43   | 2.22   |
| 1-2.c36814/1/1323  | cystathionine-beta-synthase [   | 148228062 | NP_00108682 | 22.88  | 68.35   | 21.72  | 16.66  | 11.37  | 41.3   | 32.29  | 26.53  | 19.37  | 9.06   | 18.23  | 5      |
| 2-3.c53002/1/2182  | PREDICTED: succinate dehy       | 847123585 | XP_01281758 | 12.65  | 5.51    | 8.49   | 13.35  | 12.38  | 4.61   | 7.8    | 7.75   | 11.63  | 2.76   | 2.26   | 4.34   |
| 2-3.c56434/1/2284  | PREDICTED: coiled-coil dot      | 641766364 | XP_00816802 | 0      | 0       | 0      | 0.57   | 0.08   | 0      | 0      | 0      | 0      | 0.23   | 1.91   | 2.45   |
| 3-6.e16732/1/4896  | PREDICTED: elongation fac       | 557264210 | XP_00601757 | 532.46 | 611.95  | 310.33 | 387.49 | 394.4  | 489.56 | 332.88 | 415.87 | 454.15 | 214.75 | 95.59  | 232.53 |
| 1-2.c18004/1/1247  | --                              | --        | --          | 31.58  | 26.55   | 77.44  | 47.12  | 2.19   | 7.72   | 55.16  | 37.04  | 2.19   | 0.75   | 0      | 3      |
| 1-2.c41259/1/1211  | dipose differentiation-related  | 89266853  | CAJ82576.1  | 26.58  | 18.28   | 0.35   | 36.69  | 17.1   | 5.22   | 39.14  | 14.36  | 10.44  | 155.12 | 186.03 | 191.24 |
| 1-2.c23812/1/4040  | Myozenin-1-like [Xenopus la     | 148237556 | NP_00107945 | 8.35   | 0       | 5.66   | 7.07   | 5.74   | 4.39   | 3.93   | 5.86   | 5.56   | 0      | 0.32   | 2.32   |
| 1-2.c12069/1/1653  | PREDICTED: myosin-bindin        | 556950430 | XP_00598765 | 0.78   | 0       | 1.05   | 1.67   | 1.1    | 0.83   | 0.45   | 2.29   | 1.17   | 0      | 0      | 0.1    |
| 2-3.c23623/1/2574  | --                              | --        | --          | 10.27  | 11.1    | 4.15   | 4.18   | 4.62   | 7      | 15.24  | 5.5    | 4.03   | 2.09   | 0.63   | 0.62   |
| 2-3.c59921/1/2215  | --                              | --        | --          | 3.36   | 4.73    | 1.16   | 3.12   | 1.75   | 2.09   | 2.76   | 1.15   | 1.32   | 20.19  | 18.17  | 15.81  |
| 1-2.c2584/9/1436.1 | PREDICTED: uncharacterize       | 847175141 | XP_01281044 | 76.56  | 5.14    | 11.65  | 43.32  | 56.15  | 3.09   | 49.89  | 56.19  | 45.17  | 519.93 | 323.19 | 442.6  |
| 2-3.c39807/2/1874  | PREDICTED: UBX domain-          | 301619867 | XP_0029393C | 0      | 0.75    | 0      | 0.2    | 0      | 0.44   | 0      | 0      | 0      | 3.01   | 3.32   | 0      |
| 2-3.c34128/1/2609  | AMP deaminase 3 [Xenopus        | 71895767  | NP_00102568 | 28.66  | 0.65    | 12.24  | 13.64  | 25.15  | 0.25   | 7.13   | 20.93  | 11.64  | 3.45   | 0.86   | 2.59   |
| 2-3.c47283/1/2648  | PREDICTED: elongation fac       | 557264210 | XP_00601757 | 727.64 | 1584.29 | 640.33 | 490.95 | 544.14 | 628.08 | 406.41 | 375.07 | 584.85 | 141.01 | 125.4  | 310.36 |
| 2-3.c62272/69/2529 | cyclin I [Xenopus laevis]-gii   | 148228521 | NP_00108357 | 39.49  | 45.5    | 30.15  | 20     | 23.54  | 17.39  | 11.03  | 22.37  | 25.14  | 7.5    | 4.4    | 12.03  |
| 3-6.e11189/1/3345  | PREDICTED: filamin-B isof       | 512839151 | XP_00491422 | 2.13   | 5.47    | 1.38   | 1.36   | 0.95   | 0.6    | 1.86   | 1.17   | 1.11   | 9.19   | 10.22  | 21.43  |
| 1-2.c32962/1/1359  | --                              | --        | --          | 8.08   | 88.02   | 6.12   | 10.5   | 6.08   | 18.27  | 8.46   | 5.97   | 12.3   | 77.88  | 142.57 | 60.93  |
| 2-3.c16494/1/2040  | --                              | --        | --          | 9.7    | 8.42    | 14.92  | 5.12   | 5.33   | 17.25  | 6.27   | 9.62   | 16.94  | 1.93   | 4.08   | 1.18   |
| 1-2.e16850/6/1326  | PREDICTED: MKI67 FHA c          | 327266746 | XP_00321816 | 0      | 65.8    | 35.25  | 24.18  | 17.72  | 19.77  | 23.89  | 29.52  | 84.99  | 14.4   | 0.87   | 0      |
| 1-2.c23282/1/1451  | tropomodulin 4 (muscle) [Xe     | 148233551 | NP_00108736 | 10.07  | 3.9     | 26.76  | 17.11  | 14.55  | 19.17  | 23.37  | 19.57  | 24.3   | 13.14  | 7.24   | 6.14   |
| 2-3.c16255/1/2324  | hypothetical protein N340_02    | 678134232 | KFV03414.1  | 4.29   | 61.95   | 4.71   | 9.22   | 4.49   | 12.56  | 7.56   | 4.76   | 8.93   | 52.37  | 92.11  | 43.45  |
| 2-3.c40106/1/6028  | calsequestrin 1 (fast-twitch, s | 148231736 | NP_00108022 | 63.41  | 8.95    | 93.57  | 98.2   | 130.18 | 83.51  | 121.78 | 117.42 | 122.78 | 65.73  | 56.58  | 45.72  |
| 1-2.c25887/1/1332  | --                              | --        | --          | 4.25   | 0.73    | --     | 3.73   | 0.97   | 5.25   | 2.94   | 0      | 4.24   | 35.09  | 29.76  | 13.26  |
| 1-2.c5924/1/4751.2 | PREDICTED: fructose-bisph       | 731506121 | XP_0105968C | 26.55  | 6.28    | 33.44  | 52.01  | 31.32  | 4.79   | 24.41  | 28.92  | 60.5   | 10.02  | 18.84  | 7.57   |
| 2-3.c19378/1/1970  | PREDICTED: non-syndromi         | 847139923 | XP_01282102 | 262.8  | 4.26    | 39.02  | 119.08 | 158.19 | 1.65   | 97.38  | 140.7  | 132.43 | 47.41  | 34.44  | 82.67  |
| 2-3.c23308/1/2203  | --                              | --        | --          | 0.23   | 0       | 0.09   | 0      | 0.12   | 0      | 1.08   | 1.32   | 0      | 0      | 0      | 0      |
| 3-6.c15842/1/3726  | Ca2+-ATPase 1 [Rana clamit      | 12055497  | CAC20853.1  | 11.07  | 2.03    | 19.79  | 9.41   | 13.81  | 12.22  | 7.74   | 11.25  | 14.02  | 1.08   | 0.37   | 6.3    |
| 1-2.c43968/1/1614  | --                              | --        | --          | 4.77   | 15.87   | 5.3    | 6.59   | 3.6    | 3.11   | 4.77   | 4.52   | 8.65   | 2.62   | 0.27   | 1.66   |
| 3-6.c2673/9/3888   | isoleucine--tRNA ligase, cyte   | 148231881 | NP_00109065 | 31.9   | 66.9    | 25.13  | 24.46  | 26.6   | 48.39  | 23.59  | 18.74  | 21.48  | 5.56   | 7.13   | 14.12  |
| 2-3.c33808/1/2453  | von Willebrand factor A dom     | 148228482 | NP_00107996 | 4.64   | 5.21    | 5.24   | 4.42   | 10.97  | 9.87   | 11.55  | 4.44   | 6.33   | 45.48  | 42.55  | 97.77  |

|                                                    |           |             |          |         |          |          |          |          |          |          |          |          |          |          |
|----------------------------------------------------|-----------|-------------|----------|---------|----------|----------|----------|----------|----------|----------|----------|----------|----------|----------|
| 1-2.c41097/1/5164. PREDICTED: actin, alpha ca      | 803091489 | XP_00401102 | 31692.48 | 5125.53 | 40180.95 | 36051.11 | 43549.69 | 40700.32 | 36770.55 | 49983.84 | 34909.23 | 24663.33 | 17659.18 | 14719.77 |
| 2-3.c39789/1/2655.:-                               | --        | --          | 5.51     | 15.49   | 18.74    | 7.28     | 6.35     | 6.67     | 3.39     | 6.81     | 12.94    | 2.08     | 1.27     | 1.44     |
| 2-3.c37179/1/2366. PREDICTED: nascent polype       | 847099444 | XP_01281224 | 26.28    | 0       | 0.91     | 11.17    | 13       | 0.25     | 4.44     | 15.51    | 13.39    | 0.24     | 4.83     | 2.81     |
| 1-2.c22974/1/5869. collagen alpha-1(I) chain prec  | 58332412  | NP_00101100 | 0        | 7.7     | 0        | 0        | 0        | 359.09   | 0        | 0        | 0        | 32.95    | 0        | 19.56    |
| 1-2.c37322/10/1793BTB (POZ) domain containir       | 147900907 | NP_00109018 | 23.89    | 21.58   | 18.31    | 16.34    | 20.05    | 8.51     | 9.41     | 17.15    | 16.79    | 4.25     | 2.77     | 8.91     |
| 2-3.c54875/1/2178. mitochondrial pyruvate carrie   | 148235923 | NP_00108884 | 464.57   | 157.89  | 357.51   | 383.2    | 451.35   | 222.14   | 376.71   | 368.03   | 432.81   | 176.25   | 173.09   | 164.34   |
| 2-3.c61046/1/2203. PREDICTED: E3 ubiquitin-p       | 512849811 | XP_00491562 | 40.32    | 28.91   | 34.56    | 37.5     | 21.22    | 24       | 18.8     | 35.49    | 41.47    | 11.24    | 8.43     | 20.16    |
| 3-6.c12854/3/2832. myosin heavy chain, partial [I  | 4249701   | AAID13772.1 | 2.98     | 0.41    | 40.02    | 33.37    | 22.41    | 0.14     | 41.66    | 11.32    | 10.49    | 2.37     | 1.5      | 0.64     |
| 1-2.c25049/1/1527. :-                              | --        | --          | 2.09     | 43.86   | 3.64     | 7.36     | 2.36     | 11.07    | 2.72     | 2.5      | 7.3      | 42.99    | 87.15    | 36.11    |
| 1-2.c21994/4/1529. lymphocyte cytosolic protein    | 350994415 | NP_00108021 | 43.62    | 3.77    | 8.28     | 35.84    | 35.39    | 2.18     | 21.7     | 30.8     | 36.53    | 275.84   | 266.61   | 213.24   |
| 1-2.c33476/1/1359. plasminogen activator inhibit   | 47575766  | NP_00100122 | 30.37    | 36.78   | 20.7     | 22.83    | 18.24    | 22.77    | 17.98    | 20.89    | 24.74    | 7.46     | 7.18     | 9.85     |
| 1-2.c4153/45/1348. ribosomal protein L3-like [Xc   | 148223643 | NP_00108803 | 415.51   | 20.1    | 306.18   | 353.31   | 217.74   | 163.41   | 254.78   | 215.05   | 189.78   | 118.84   | 139.02   | 57.71    |
| 2-3.c3839/2/2213.1 --                              | --        | --          | 0        | 0       | 0        | 1.3      | 0        | 0        | 0        | 0.33     | 0        | 11.06    | 3.91     | 3.94     |
| 1-2.c15642/1/1567 --                               | --        | --          | 8.26     | 19.62   | 38.24    | 27.76    | 17.81    | 49.37    | 39.18    | 20.33    | 49.88    | 25.34    | 9.12     | 10.27    |
| 2-3.c63424/1/1885. calsequestrin 1 (fast-twitch, s | 148231736 | NP_00108022 | 3.01     | 0.75    | 9.86     | 6.37     | 9.67     | 8.45     | 8.86     | 7.29     | 8.37     | 2.79     | 1.53     | 3.5      |
| 3-6.c16571/1/3739. Ca2+-ATPase 1 [Rana clamit      | 12055497  | CAC20853.1  | 4.54     | 0.47    | 5.12     | 4.54     | 4.13     | 2.8      | 3.19     | 4.32     | 4.77     | 1.01     | 1.9      | 1.45     |
| 3-6.c2260/20/2990. PREDICTED: splicing factor      | 847091403 | XP_01282544 | 21.99    | 24.22   | 9.5      | 9.48     | 14.21    | 10.51    | 5.38     | 12.31    | 9        | 2.96     | 2.46     | 5.04     |
| 2-3.c37060/1/2562 --                               | --        | --          | 2.14     | 4.38    | 4.41     | 2.94     | 2.56     | 2.87     | 3.65     | 3.02     | 3.44     | 1.26     | 0.42     | 0.91     |
| 3-6.c4339/2/3095. PREDICTED: protein DGCR          | 847085100 | XP_01281098 | 1.17     | 2.61    | 1.47     | 1.26     | 0        | 0        | 0.88     | 1.2      | 1.27     | 0        | 0.25     | 0.12     |
| 1-2.c44314/1/5036. actin, alpha cardiac muscle 2   | 45361557  | NP_989355.1 | 8662.19  | 1575.19 | 11703.18 | 11194.84 | 12611.92 | 11777.41 | 9631.32  | 13753.84 | 11230.27 | 6853.91  | 4273.78  | 5319.49  |
| 3-6.c6918/1/2848 --                                | --        | --          | 132.33   | 339.06  | 158.86   | 178.09   | 173.2    | 251.44   | 149.65   | 164.38   | 95.46    | 78.5     | 62.82    | 54.37    |
| 3-6.c15910/1/3113. transmembrane protein 131 [C    | 213982761 | NP_00113555 | 2.3      | 1.97    | 2.03     | 1.15     | 2.57     | 2.49     | 1.99     | 1.7      | 1.88     | 0.59     | 0        | 0.44     |
| 1-2.c3233/1/1824.1 --                              | --        | --          | 1.34     | 4.45    | 0.67     | 1.51     | 0.56     | 1.37     | 1.35     | 0.63     | 1.67     | 16.78    | 9.62     | 24.06    |
| 3-6.c13176/3/2921. PREDICTED: muskelin [Xer        | 301604525 | XP_00293185 | 4.96     | 4.34    | 3.64     | 5.54     | 5.52     | 2.98     | 9.38     | 5        | 4.91     | 1.45     | 0.78     | 4.06     |
| 1-2.c39108/2/1326. PREDICTED: heme-binding         | 512861457 | XP_00491715 | 0.65     | 1.87    | 0.18     | 0.9      | 0        | 0.42     | 1.44     | 0        | 0        | 10       | 10.44    | 8.75     |
| 1-2.c45479/1/1278. SEC62 homolog [Xenopus la       | 148234873 | NP_00108684 | 1.88     | 7.17    | 1.42     | 0.15     | 0.33     | 4.41     | 1.09     | 1.09     | 2.02     | 0        | 0        | 0        |
| 3-6.c8715/1/2816.2 --                              | --        | --          | 4.75     | 7.15    | 2.18     | 4        | 1.79     | 3.53     | 3.88     | 2.71     | 3.34     | 30.91    | 40.26    | 40.53    |
| 1-2.c10941/19/172Cetoposide-induced protein 2.4    | 62857461  | NP_00101718 | 0        | 21.62   | 0        | 0.21     | 0.54     | 0.23     | 0.23     | 14.21    | 18.79    | 0.7      | 0.54     | 0.14     |
| 2-3.c15779/2/2246.:-                               | --        | --          | 2.06     | 2.12    | 6.43     | 5.92     | 6.1      | 4.8      | 5.42     | 7.32     | 4.65     | 1.23     | 0        | 0.56     |
| 2-3.c31475/89/21475'-aminolevulinate synthase 1    | 148232986 | NP_00108605 | 30.31    | 51.47   | 31.84    | 20.21    | 41.94    | 32.57    | 29.23    | 14.59    | 32.42    | 9.76     | 14.49    | 8.46     |
| 3-6.c19030/1/2763. PREDICTED: uncharacterize       | 827537520 | XP_01254756 | 0        | 9.69    | 4.02     | 0        | 6.67     | 4.56     | 0        | 0        | 0.06     | 7.9      | 5.03     | 0        |
| 2-3.c42951/1/2353. inhibitor of Bruton tyrosine k  | 147902812 | NP_00108492 | 4.38     | 6.6     | 4.93     | 2.29     | 5.14     | 6.7      | 4.96     | 2.67     | 5.35     | 1.49     | 0.85     | 1.23     |
| 1-2.c16867/1/1547. PREDICTED: collagen alpha       | 512835852 | XP_00491377 | 6.41     | 74.34   | 12.44    | 5.08     | 9.09     | 37.38    | 4.12     | 5.37     | 4.95     | 0.71     | 0        | 2.24     |
| 1-2.c14379/1/1183. muscle creatine kinase [Xeno    | 147899942 | NP_00108007 | 14.44    | 2.12    | 25.82    | 18.39    | 15.37    | 6.81     | 16.82    | 14.55    | 17.45    | 1.05     | 2.72     | 11.5     |
| 1-2.c33729/4/1837. PREDICTED: junctophilin-2       | 557262533 | XP_00601678 | 24.33    | 23.08   | 47.34    | 14.98    | 18.6     | 36.37    | 37.98    | 21.45    | 33.7     | 5.29     | 7.45     | 23.8     |
| 2-3.c4534/1/2519. transcription factor 25 (basic   | 148237729 | NP_0010914C | 0.22     | 6.79    | 0.42     | 0.8      | 0.48     | 1.36     | 0        | 0.24     | 0.4      | 8.06     | 14.65    | 3        |
| 2-3.c7381/1/2402. PREDICTED: L-lactate dehy        | 675698937 | XP_00275513 | 74.39    | 6.32    | 67.6     | 190.34   | 127.42   | 35.98    | 73.27    | 61.83    | 155.69   | 42.86    | 34.91    | 35.74    |
| 2-3.c52702/1/2622. :-                              | --        | --          | 0        | 0       | 0.34     | 2.17     | 0.64     | 0        | 4.2      | 1.78     | 0        | 0        | 0        | 0        |
| 3-6.c17927/1/3814. myosin heavy chain, partial [I  | 4249697   | AAID13770.1 | 0.08     | 0.04    | 0.21     | 0.35     | 0.42     | 0        | 0.49     | 0.44     | 0.26     | 0        | 0        | 0        |
| 2-3.c13088/1/2345. :-                              | --        | --          | 8.24     | 55.62   | 5.35     | 9.33     | 6.63     | 15.9     | 22.69    | 7.91     | 6.77     | 119.55   | 118.74   | 115.08   |
| 1-2.c2610/4/1667. cysteine conjugate-beta lyase    | 148228780 | NP_00108074 | 22.05    | 13.76   | 15.2     | 19.89    | 17.65    | 7.57     | 12.72    | 13.36    | 16.46    | 4.61     | 6.27     | 5.23     |
| 2-3.c1643/25/2088. arginine--tRNA ligase, cytopl   | 45361659  | NP_989403.1 | 30.94    | 53.73   | 18.73    | 14.24    | 23.74    | 34.19    | 17.8     | 19.65    | 14.4     | 5.31     | 2.32     | 12.44    |
| 2-3.c2162/2/2024. 4-aminobutyrate aminotransf      | 189230071 | NP_00112152 | 7.14     | 0       | 2.57     | 4.46     | 3.62     | 1.19     | 5.44     | 3.55     | 3.44     | 0.51     | 1.15     | 1.44     |
| 2-3.c2075/12/2429. PREDICTED: transcription fi     | 512866157 | XP_00491777 | 0.21     | 0.56    | 0        | 0        | 0.47     | 0.41     | 0        | 0        | 2.51     | 1.09     | 0.67     | 0        |
| 2-3.c35761/2/2251. :-                              | --        | --          | 0        | 0.19    | 0        | 0        | 0        | 0.85     | 0.41     | 1.02     | 0.6      | 0        | 0        | 0        |
| 1-2.c33891/1/13293uncharacterized protein LOC.     | 148226670 | NP_00107975 | 87.53    | 1.43    | 71.1     | 93.8     | 88.76    | 8.39     | 53.87    | 56.17    | 79.46    | 36.66    | 23.03    | 17.97    |
| 1-2.c3962/1/1460. PREDICTED: actin, alpha ca       | 803091489 | XP_00401102 | 569.51   | 639.82  | 2568.28  | 4537.68  | 1706.55  | 1487.03  | 2770.22  | 1723.85  | 4251.09  | 1788.14  | 991.87   | 1226.11  |
| 2-3.c26155/1/2321. fragile X mental retardation s  | 147899444 | NP_00108178 | 68.65    | 36.98   | 59.93    | 24.11    | 31.95    | 64.98    | 27.04    | 63.28    | 6.26     | 8.66     | 17.81    | 0        |
| 3-6.c15452/1/3111. PREDICTED: transcription e      | 512819310 | XP_0049116C | 1.32     | 10.38   | 1.14     | 0.83     | 0.57     | 7.52     | 0.79     | 0.45     | 2.15     | 0.03     | 0        | 0.13     |
| 3-6.c17352/1/3759. Ca2+-ATPase 1 [Rana clamit      | 12055497  | CAC20853.1  | 1.42     | 0.7     | 3.33     | 3.7      | 2.28     | 0.94     | 2.12     | 2.54     | 3.96     | 0.86     | 0.45     | 1.2      |
| 3-6.c3531/2/3282. Disintegrin metalloproteinase    | 213626841 | AAI70225.1  | 0        | 3.49    | 0.88     | 0        | 3.09     | 1.18     | 0        | 0        | 0        | 1.51     | 0        | 2.61     |
| 2-3.c16381/1/2420. :-                              | --        | --          | 0        | 0       | 0        | 0        | 1.26     | 0        | 1.25     | 0        | 0.82     | 0        | 0        | 0        |
| 2-3.c36656/1/2219.:-                               | --        | --          | 2.83     | 10.24   | 1.31     | 0.82     | 5        | 1.86     | 0.92     | 1        | 2.59     | 20.53    | 20.04    | 30.75    |
| 3-6.c4258/1/7410.2 --                              | --        | --          | 0.86     | 4.86    | 1.31     | 2.37     | 1.14     | 2.59     | 2.32     | 0.98     | 2.82     | 34.64    | 37.13    | 29.13    |
| 2-3.c60391/6/2486. PREDICTED: aspartate--trN       | 847163066 | XP_01282572 | 166.02   | 117.03  | 119.35   | 117.25   | 109.59   | 117.76   | 82.14    | 71.38    | 102.89   | 46.61    | 27.78    | 42.04    |
| 1-2.c6930/1/1716. PREDICTED: myb-related tr        | 847171315 | XP_01280905 | 0.08     | 6.48    | 0.28     | 0.37     | 0.44     | 0.48     | 0.4      | 0.22     | 0.1      | 3.61     | 9.82     | 4.48     |
| 2-3.c2766/2/1833. acetylcholine receptor subuni    | 148227704 | NP_00108091 | 12.76    | 9.59    | 15.75    | 7.63     | 4.46     | 21.05    | 4.55     | 5.89     | 6.67     | 1.9      | 0.35     | 2.4      |
| 1-2.c39909/1/1309. NADH dehydrogenase (ubiq        | 148225889 | NP_00108733 | 140.85   | 116.54  | 120.27   | 116.42   | 137.84   | 121.28   | 95.23    | 111.74   | 121.72   | 46.7     | 63.3     | 43.96    |

|                    |                                 |           |             |        |        |        |        |        |        |        |        |        |        |        |        |
|--------------------|---------------------------------|-----------|-------------|--------|--------|--------|--------|--------|--------|--------|--------|--------|--------|--------|--------|
| 1-2.c47054/4/1688  | unnamed protein product [Ho     | 221040588 | BAH11971.1  | 0      | 0      | 0      | 0      | 0      | 0.12   | 0      | 0      | 0      | 0.43   | 1.66   | 4.33   |
| 1-2.c38704/2/1288  | PREDICTED: microtubule-as       | 847168440 | XP_01280802 | 9.1    | 1.37   | 7.46   | 7.63   | 7.2    | 0      | 5.3    | 10.09  | 15.51  | 3.65   | 6.57   | 0.52   |
| 2-3.c43680/1/1897  | calsequestrin 1 (fast-twitch, s | 148231736 | NP_00108022 | 6.46   | 1.02   | 11.09  | 8.91   | 11.83  | 9.34   | 9.56   | 9.84   | 11.77  | 4.3    | 3      | 3.9    |
| 1-2.c33241/1/1423  | --                              | --        | --          | 7.72   | 9.28   | 1.3    | 2.5    | 2.71   | 4.06   | 2.93   | 2.51   | 6.36   | 52.59  | 45.71  | 35.29  |
| 2-3.c52987/1/2184  | --                              | --        | --          | 14.66  | 35.7   | 3.09   | 11.35  | 6.12   | 5.97   | 7.31   | 8.87   | 5.96   | 78.45  | 134.84 | 52.93  |
| 3-6.c16410/1/2950  | Unknown (protein for IMAG       | 197246230 | AAI68800.1  | 1.38   | 0      | 0      | 0      | 0      | 0.66   | 1.11   | 0      | 2.13   | 0      | 0      | 0      |
| 1-2.c9838/3/1695   | PREDICTED: LOW QUALI            | 507933757 | XP_00467811 | 3.66   | 30.08  | 15.5   | 13.82  | 5.88   | 13.02  | 18.22  | 7.77   | 14.47  | 1.79   | 3.23   | 8.79   |
| 2-3.c23168/1/2591  | PREDICTED: glycogen phos        | 564238421 | XP_00627608 | 0.37   | 1.59   | 0.73   | 1.08   | 0.88   | 0      | 0      | 0.22   | 0      | 3.64   | 2.05   | 10.68  |
| 1-2.c35516/1/1250  | --                              | --        | --          | 1.28   | 0.41   | 1.8    | 2.48   | 1.35   | 1.18   | 4.14   | 0      | 0.51   | 34.34  | 28.13  | 12.08  |
| 2-3.c33167/1/2448  | PREDICTED: collagen alpha       | 512835856 | XP_00491377 | 1.9    | 16.44  | 5.72   | 2.2    | 3.57   | 11.79  | 1.47   | 3.4    | 2.15   | 0.33   | 0.66   | 0.51   |
| 1-2.c36250/1/1731  | --                              | --        | --          | 1.13   | 2.42   | 0      | 3.9    | 0      | 0      | 0      | 2.18   | 6.07   | 0      | 0      | 0      |
| 1-2.c24591/3/1918  | PREDICTED: cold shock dor       | 847087980 | XP_01281925 | 27.48  | 10.19  | 16.22  | 17.71  | 32.47  | 12.43  | 9.26   | 22.77  | 17.09  | 2.26   | 2.13   | 11.12  |
| 2-3.c63586/1/2000  | calsequestrin 1 (fast-twitch, s | 148231736 | NP_00108022 | 13.42  | 2.02   | 24.97  | 22.35  | 24.02  | 19.41  | 24.91  | 26.45  | 24.71  | 12.06  | 10.59  | 10.45  |
| 2-3.c14998/1/2208  | --                              | --        | --          | 100.53 | 37.55  | 60.13  | 81.04  | 97.3   | 62.43  | 89.56  | 94.02  | 87.5   | 53.19  | 39.71  | 28.98  |
| 1-2.c2556/2/1/1512 | polymerase delta-interacting j  | 62860016  | NP_00101705 | 73.98  | 44.2   | 42.47  | 47.02  | 44.58  | 37.29  | 43.99  | 44.63  | 44.94  | 15.04  | 25.27  | 19.26  |
| 2-3.c3619/4/2319   | PREDICTED: CCR4-NOT tr          | 847135304 | XP_01282014 | 5.29   | 1.9    | 0.71   | 3.59   | 0.7    | 0      | 3.69   | 3.63   | 2.57   | 0      | 2.97   | 0      |
| 2-3.c46119/1/2026  | PREDICTED: cytoplasmic d        | 573907129 | XP_00664128 | 10.19  | 0      | 4.56   | 0      | 0.16   | 0      | 0      | 9.58   | 4.55   | 0      | 0      | 0      |
| 3-6.c16264/1/3574  | PREDICTED: saccin-like [Xc      | 847149439 | XP_01282272 | 4.2    | 0.09   | 1.71   | 0      | 2.42   | 0.73   | 0      | 0      | 4.95   | 2.33   | 0      | 0      |
| 2-3.c40455/1/2250  | --                              | --        | --          | 0.91   | 7.76   | 0.32   | 0.71   | 0.13   | 6.92   | 0.29   | 0.85   | 0.52   | 6.71   | 8.47   | 8.75   |
| 2-3.c21327/1/2387  | --                              | --        | --          | 45.34  | 2.56   | 27.13  | 22     | 10     | 2.66   | 11.04  | 10.3   | 18.46  | 4.01   | 8.78   | 4.12   |
| 2-3.c42864/1/2052  | PREDICTED: zinc finger pro      | 821456582 | XP_01240918 | 0      | 0      | 0.92   | 0.45   | 0      | 0      | 0      | 0      | 3.28   | 2.33   | 0      | 0      |
| 1-2.c1763/54/1497  | PREDICTED: LOW QUALI            | 554568265 | XP_00587840 | 195.54 | 308.3  | 116.7  | 120.57 | 112.15 | 182.78 | 129.27 | 107.77 | 125.13 | 52.98  | 38.41  | 71     |
| 2-3.c56842/1/2665  | --                              | --        | --          | 0.65   | 5.48   | 0.55   | 1.83   | 2.57   | 6.89   | 1.58   | 2.17   | 2.64   | 24.73  | 15.39  | 46.14  |
| 2-3.c60219/1/2684  | --                              | --        | --          | 1.82   | 8.71   | 0.65   | 1.43   | 1.43   | 3.52   | 3.26   | 0.69   | 1.71   | 18.66  | 29.05  | 13.16  |
| 3-6.c12012/4/3156  | PREDICTED: calpain-7 isofc      | 847134772 | XP_01281995 | 3.61   | 1.71   | 2.88   | 0      | 3.67   | 0      | 2.31   | 3.53   | 2.63   | 0      | 2.71   | 0      |
| 3-6.c16629/1/3186  | hypothetical protein CAPTEI     | 443682880 | ELT87315.1  | 3.99   | 63.61  | 3.55   | 7.35   | 3.46   | 11.48  | 5.52   | 3.69   | 9.28   | 52.43  | 98.02  | 42.06  |
| 1-2.c23673/1/1619  | RecName: Full=Sarcoplasmic      | 9789732   | Q92105.1    | 3.13   | 0.43   | 3.09   | 5.01   | 6.65   | 3.45   | 4.32   | 5.01   | 3.39   | 1.58   | 1.01   | 0.37   |
| 2-3.c8618/1/2477   | PREDICTED: protein phosph       | 557024824 | XP_00601258 | 4.11   | 0.44   | 0      | 4.66   | 3.3    | 0.12   | 3.77   | 1.2    | 1.13   | 0.35   | 0.58   | 0      |
| 2-3.c23264/1/2196  | --                              | --        | --          | 8.13   | 10.6   | 8.48   | 11.31  | 9.53   | 15.78  | 23.86  | 9.6    | 13.76  | 117.08 | 130.43 | 129.38 |
| 1-2.c3566/2/1828   | DEAD (Asp-Glu-Ala-Asp) bc       | 148228442 | NP_00108267 | 5.84   | 13.11  | 3.81   | 4.12   | 1.3    | 0.35   | 9.97   | 6.21   | 9.48   | 1.78   | 2.13   | 4.37   |
| 1-2.c38627/7/1404  | PREDICTED: LOW QUALI            | 637378851 | XP_00812323 | 8.1    | 1.14   | 7.02   | 5.4    | 3.46   | 2.7    | 9.58   | 8.35   | 5.57   | 3.77   | 0.41   | 2.39   |
| 1-2.c41326/1/1283  | lysozyme g [Ictalurus furcatu   | 308322267 | ADO28271.1  | 1.96   | 9.29   | 6.92   | 4.96   | 6.57   | 3.74   | 3.76   | 4.99   | 5.39   | 1.08   | 0.8    | 0.65   |
| 2-3.c10121/1/2337  | hypothetical protein LOTGIE     | 676427143 | XP_00904485 | 4.85   | 5.73   | 2.58   | 2.07   | 3.76   | 3.57   | 3.48   | 2.12   | 2.92   | 14.2   | 35.46  | 29.02  |
| 2-3.c12010/1/2021  | --                              | --        | --          | 3      | 11.36  | 1.9    | 1.2    | 2.97   | 5.84   | 3.4    | 2.52   | 2.78   | 26.18  | 63.05  | 29.2   |
| 2-3.c36258/1/2897  | --                              | --        | --          | 1.45   | 0.95   | 0      | 3.11   | 1.59   | 0.98   | 5.14   | 2.22   | 0      | 48.89  | 55.35  | 16.96  |
| 2-3.c37376/1/2525  | --                              | --        | --          | 0      | 0.05   | 0      | 0      | 0      | 2.44   | 1.1    | 0      | 0.84   | 0      | 0      | 0      |
| 3-6.c16635/1/3634  | ATPase, Ca++ transporting, c    | 148685413 | EDL17360.1  | 2.05   | 0.37   | 3.27   | 2.62   | 3.17   | 2.21   | 2.38   | 2.56   | 2.9    | 0.33   | 0.2    | 1.57   |
| 3-6.c16672/1/3633  | RecName: Full=Sarcoplasmic      | 9789732   | Q92105.1    | 8.37   | 1.64   | 8.47   | 7.35   | 7.18   | 5.07   | 6.72   | 8.34   | 10.56  | 4.3    | 3.73   | 2.81   |
| 3-6.c7455/1/2766   | --                              | --        | --          | 3.17   | 4.15   | 8.56   | 2.36   | 2.22   | 12.72  | 3.86   | 2.16   | 4.17   | 0.4    | 0.76   | 1.52   |
| 1-2.c22044/5/1312  | DIM1 dimethyladenosine tra      | 148233697 | NP_00108968 | 5.14   | 20.05  | 6.27   | 5.67   | 4.05   | 19.77  | 7.68   | 3.25   | 3.41   | 0.54   | 1.14   | 0.97   |
| 1-2.c41975/4/1473  | --                              | --        | --          | 5.74   | 7.88   | 0      | 2.3    | 3.36   | 1.15   | 7.24   | 7.92   | 2.55   | 0.03   | 0      | 3.87   |
| 1-2.c24583/1/1504  | PREDICTED: FYVE, RhoG           | 847121379 | XP_01281725 | 0.92   | 6.88   | 1.23   | 2.52   | 1.52   | 0.99   | 2.7    | 0.44   | 1.5    | 20.99  | 20.87  | 11.02  |
| 1-2.c38359/1/7801  | --                              | --        | --          | 11.85  | 2.75   | 28.65  | 17.2   | 23.27  | 16.79  | 21.98  | 16.66  | 26.24  | 4.77   | 0      | 7.71   |
| 2-3.c4331/1/2018   | myosin, heavy chain 4, skelet   | 47575800  | NP_00100124 | 5.08   | 0      | 5.53   | 2.89   | 8.55   | 0      | 2.27   | 6.54   | 8.02   | 1.35   | 2.96   | 1.2    |
| 1-2.c11308/1/1339  | PREDICTED: collagen alpha       | 847135925 | XP_01282037 | 17.05  | 455.87 | 63.97  | 43.67  | 38.41  | 508.48 | 48.79  | 34.21  | 67.09  | 30.14  | 16.91  | 18.18  |
| 2-3.c56092/1/2135  | PREDICTED: myosin-7B [X         | 512871888 | XP_00293293 | 1.64   | 1.01   | 0.94   | 0.39   | 0.64   | 11.7   | 3.22   | 0.81   | 1.19   | 0.4    | 0      | 0.16   |
| 1-2.c24587/4/1759  | PREDICTED: sorting and ass      | 543379494 | XP_00553294 | 145.46 | 121.95 | 122.08 | 126.64 | 102.31 | 97.59  | 102.12 | 109.52 | 107.57 | 51.66  | 50.62  | 48.6   |
| 1-2.c11455/1/1975  | --                              | --        | --          | 0      | 0      | 0      | 1.02   | 0      | 0.75   | 0      | 0      | 0      | 192.63 | 616.42 | 13.87  |
| 3-6.c7163/2/3453   | uncharacterized protein LOC     | 147905311 | NP_00109060 | 0      | 0      | 0      | 0.78   | 0      | 0.19   | 0      | 0.14   | 0.02   | 0.92   | 1.78   | 4.39   |
| 1-2.c46475/1/1217  | PREDICTED: glutamine-rich       | 667335925 | XP_00859303 | 0      | 37.12  | 0.21   | 0.21   | 0      | 0.29   | 0.81   | 12.39  | 19.26  | 0      | 0.6    | 0.86   |
| 2-3.c28936/1/6835  | .methylcrotonoyl-CoA carbox     | 148229681 | NP_00108606 | 4.62   | 2.08   | 2.67   | 4.74   | 1.29   | 3.95   | 2.97   | 3.49   | 8.72   | 0      | 0.24   | 0.45   |
| 3-6.c4391/1/2941   | --                              | --        | --          | 28.6   | 5.55   | 18.4   | 11.24  | 18.81  | 12.73  | 8.22   | 17.83  | 10.82  | 4.23   | 5.21   | 5.32   |
| 1-2.c17541/1/1368  | --                              | --        | --          | 6.14   | 3.77   | 0.44   | 1.9    | 0.1    | 3.92   | 4.04   | 2.24   | 0.57   | 27.68  | 42.98  | 29.05  |
| 1-2.c36629/1/6877  | muscle creatine kinase [Xeno    | 147899942 | NP_00108007 | 51.8   | 3.56   | 43.75  | 36.65  | 41.36  | 24.78  | 47.7   | 46.34  | 43.99  | 21.03  | 22.07  | 15.91  |
| 2-3.c3831/1/2068.1 | --                              | --        | --          | 3.68   | 70.27  | 3.09   | 7.75   | 2.68   | 14.18  | 6.25   | 3.9    | 9.57   | 62.66  | 115.87 | 46.06  |
| 1-2.c19985/1/1758  | predicted protein [Nematostel   | 156353049 | XP_00162285 | 0.16   | 0.25   | 0.46   | 0.16   | 0.29   | 0.26   | 0      | 0      | 1.45   | 1.83   | 2.79   | 0      |
| 1-2.c13598/1/1324  | PREDICTED: nuclear transcr      | 512829742 | XP_00293811 | 5.41   | 22.72  | 8.56   | 0.68   | 3.84   | 2.28   | 2.34   | 1.62   | 2.5    | 0      | 0      | 0      |
| 2-3.c32571/1/4608  | myosin heavy chain, partial [I  | 4249701   | AAD13772.1  | 0.41   | 0      | 1.96   | 1.58   | 1.18   | 0      | 2.37   | 1.44   | 2.51   | 0.34   | 0.59   | 0      |

|                                                   |                                 |           |             |          |        |         |          |          |         |          |          |          |         |         |         |
|---------------------------------------------------|---------------------------------|-----------|-------------|----------|--------|---------|----------|----------|---------|----------|----------|----------|---------|---------|---------|
| 1-2.c3586/2/1614.1                                | PREDICTED: cell cycle prog      | 847112286 | XP_01281505 | 5.01     | 0      | 0       | 4.05     | 0.9      | 1.33    | 1.12     | 3.41     | 3.69     | 0.45    | 0       | 0       |
| 2-3.c46960/1/5277                                 | PREDICTED: alanine aminot       | 410923795 | XP_00397536 | 15.09    | 5.82   | 6.48    | 12.56    | 11.33    | 4.45    | 6.51     | 4.78     | 11.34    | 2.59    | 3.88    | 2.19    |
| 3-6.c3103/5/3177                                  | segment polarity protein dish   | 183986681 | NP_00111692 | 34.33    | 8.22   | 11.96   | 20.36    | 26.18    | 9.65    | 6.55     | 15.59    | 19.53    | 6.65    | 5.36    | 5.4     |
| 2-3.c15525/3/2302                                 | PREDICTED: sarcalumenin         | 701384503 | XP_00999380 | 0        | 2.16   | 0       | 0        | 0        | 0       | 0        | 0        | 0        | 8.09    | 3.59    | 0       |
| 2-3.c22628/1/2040                                 | --                              | --        | --          | 2.41     | 24.36  | 4.22    | 3.4      | 4.85     | 8.22    | 5.39     | 2.79     | 7.63     | 34.86   | 57.42   | 47.92   |
| 1-2.c50262/1/7274.calsequestrin 1 (fast-twitch, s |                                 | 148231736 | NP_00108022 | 8.41     | 3.19   | 13.91   | 7.23     | 15.72    | 11.6    | 13.4     | 14.64    | 13.74    | 2.54    | 0       | 3.64    |
| 2-3.c55098/2/2255                                 | Mimitin, mitochondrial precu    | 226372810 | ACO52030.1  | 11.69    | 3.56   | 12.03   | 8.01     | 7.05     | 3.96    | 8.33     | 8.84     | 6.32     | 2.71    | 3.33    | 2.73    |
| 2-3.c30065/3/2184                                 | PREDICTED: dnaJ homolog         | 301610031 | XP_00293455 | 1.75     | 0      | 0.21    | 0        | 0        | 2.39    | 0        | 0        | 0.22     | 2.21    | 1.1     | 5.31    |
| 2-3.c5923/1/2107                                  | PREDICTED: fructose-bisph       | 530658308 | XP_00531468 | 195.26   | 4.26   | 70.3    | 133.6    | 118.22   | 9.25    | 59.37    | 101      | 99.57    | 45.65   | 26.17   | 49.94   |
| 1-2.c52360/19/1350                                | PREDICTED: myosin-4 [Xen        | 847156920 | XP_01282446 | 6005.93  | 157.74 | 7513.13 | 6890.47  | 7658.41  | 43.96   | 5268.66  | 12600.73 | 7273.63  | 3321    | 2499.21 | 2079.81 |
| 1-2.c12166/2/1717                                 | aldehyde dehydrogenase clas     | 4586546   | BAA76412.1  | 56.15    | 42.33  | 38.01   | 43.26    | 35.99    | 40.66   | 36.12    | 43.39    | 34.04    | 13.45   | 14.49   | 22.17   |
| 2-3.c13944/3/2237                                 | uncharacterized protein LOC     | 147906566 | NP_00109117 | 4.5      | 14.33  | 8.69    | 5.12     | 2.78     | 14.32   | 7.43     | 6.96     | 6.28     | 3.48    | 1.34    | 2.39    |
| 3-6.c8858/1/3128                                  | PREDICTED: unconventiona        | 847091229 | XP_01282520 | 13.79    | 8.25   | 19.39   | 10.28    | 16.52    | 21.08   | 11.46    | 15.89    | 13.67    | 5.03    | 6.98    | 6.25    |
| 2-3.c5383/1/2075                                  | PREDICTED: collagen alpha       | 664740187 | XP_00852735 | 0        | 6.22   | 3.23    | 1.27     | 1.36     | 2.46    | 2.91     | 3.96     | 1.71     | 1.9     | 0       | 0       |
| 3-6.c13676/1/4353                                 | PREDICTED: myosin-7 isof        | 657571574 | XP_00828936 | 1.63     | 0      | 3.01    | 1.84     | 2.57     | 0.08    | 1.92     | 3.08     | 1.87     | 0.72    | 0.89    | 0.64    |
| 1-2.c34465/1/1777                                 | myosin, heavy chain 4, skelet   | 47575800  | NP_00100124 | 2.87     | 0      | 4.25    | 2.13     | 4.89     | 0       | 1.01     | 4.32     | 6.91     | 0.51    | 0.34    | 0.51    |
| 2-3.c1851/13/2369                                 | Unknown (protein for IMAG       | 195539698 | AAI68131.1  | 6.32     | 5.37   | 7.35    | 3.98     | 6.92     | 1.04    | 2.8      | 4.62     | 3.56     | 1.4     | 0.52    | 1.09    |
| 2-3.c30173/1/2544.nuclear factor of kappa light j |                                 | 148230967 | NP_00108695 | 29.1     | 0      | 25.61   | 20.07    | 19.85    | 15.36   | 0        | 0.07     | 12.65    | 46.95   | 53.7    | 43.74   |
| 2-3.c20383/2/2501                                 | --                              | --        | --          | 3.24     | 6.59   | 5.3     | 3.61     | 2.11     | 3.38    | 0.75     | 2.75     | 4.05     | 0.63    | 0.3     | 0       |
| 2-3.c42072/1/2158                                 | PREDICTED: rho GTPase-ac        | 847148811 | XP_01282258 | 1.5      | 4.61   | 0.53    | 1.32     | 0.68     | 1.65    | 1.14     | 0.88     | 0.75     | 9.55    | 12.57   | 12.54   |
| 2-3.c20450/2/2598                                 | PREDICTED: probable E3 ul       | 847147382 | XP_01282233 | 46.97    | 12.48  | 31.62   | 31.66    | 48.22    | 20.11   | 32.67    | 37.32    | 67.1     | 24.86   | 14.19   | 23.42   |
| 1-2.c23021/1/1237                                 | PREDICTED: protein transp       | 301609492 | XP_00293425 | 1.32     | 0      | 0       | 2.17     | 0        | 0       | 0.4      | 0        | 1.15     | 13.83   | 12.28   | 4.05    |
| 1-2.c27010/6/1628                                 | PREDICTED: cytosolic 5'-nu      | 327275093 | XP_00322230 | 20.02    | 7      | 26.08   | 18.74    | 38.06    | 5.49    | 10.19    | 30.7     | 23.73    | 7.39    | 1.93    | 8.3     |
| 1-2.c30051/1/1239                                 | --                              | --        | --          | 3.24     | 43.15  | 4.65    | 0.84     | 5.36     | 20.33   | 1.83     | 0        | 3.43     | 13.1    | 18.76   | 28.02   |
| 1-2.c44265/1/1354                                 | PREDICTED: phosphate-reg        | 669271014 | XP_00862746 | 2.96     | 8.34   | 1.23    | 2.27     | 1.11     | 10.37   | 6.74     | 1.25     | 3.99     | 33.29   | 43.93   | 33.18   |
| 2-3.c63488/11/2093                                | nucleolar RNA helicase 2 [X     | 113931550 | NP_00103922 | 15.17    | 71.86  | 15.25   | 26.43    | 12.29    | 78.99   | 13.55    | 28.36    | 41.24    | 0       | 0       | 21.53   |
| 1-2.c34954/1/6762                                 | PREDICTED: fructose-bisph       | 530658308 | XP_00531468 | 807.55   | 32.68  | 125.86  | 212.03   | 829.44   | 48.15   | 445.32   | 525.76   | 169.09   | 53.72   | 89.28   | 182.75  |
| 1-2.c25024/2/1300                                 | --                              | --        | --          | 5.85     | 74.73  | 8.38    | 5.77     | 7.26     | 5.87    | 4.93     | 7        | 6.19     | 3.04    | 1.17    | 0.42    |
| 1-2.c52062/2/1259                                 | RecName: Full=Voltage-dep       | 46576355  | O57483.1    | 140.86   | 58.62  | 159.57  | 148.36   | 162.49   | 208.18  | 257.74   | 183.51   | 219.04   | 119.79  | 127.41  | 72.07   |
| 2-3.c46041/1/2575                                 | mitochondrial intermembrane     | 147905047 | NP_00108467 | 14.75    | 19.56  | 7.55    | 13.59    | 12.37    | 12.79   | 8.5      | 5.13     | 12.97    | 3.32    | 2.83    | 3.88    |
| 1-2.c2043/25/1577                                 | homeobox protein DLX3 [Elk      | 46484683  | AAS98251.1  | 3.49     | 14.09  | 5.99    | 5.83     | 2.62     | 13.95   | 17.65    | 4.19     | 5.49     | 51.11   | 58.64   | 122.17  |
| 1-2.c25710/1/1341                                 | PREDICTED: cytochrome P-        | 847139669 | XP_01282095 | 0        | 0      | 0       | 0        | 0        | 0       | 0        | 0        | 0        | 7.22    | 15.48   | 0       |
| 1-2.c27894/1/1457                                 | PREDICTED: protein FAM1         | 847095670 | XP_01281116 | 21.01    | 9.68   | 16.46   | 10.19    | 10.25    | 7.97    | 7.94     | 12.9     | 12.97    | 1.94    | 5.99    | 4.46    |
| 2-3.c26529/2/2131                                 | PREDICTED: chloride intrac      | 530655848 | XP_00531393 | 0.07     | 0.26   | 1.19    | 1.15     | 0.15     | 0       | 1.5      | 1.08     | 1.17     | 0       | 0       | 0.22    |
| 1-2.c28400/2/1715                                 | Keratin, type II cytoskeletal c | 678188672 | KFV56394.1  | 13.32    | 5.22   | 7.98    | 7.68     | 7.28     | 0       | 5.95     | 4.96     | 5        | 2.07    | 0.67    | 0.19    |
| 2-3.c47102/1/2525                                 | PREDICTED: trafficking pro      | 847136021 | XP_01282041 | 0.4      | 0      | 0.24    | 0        | 0        | 0.2     | 0        | 0        | 0        | 2.11    | 0       | 1.75    |
| 2-3.c1841/28/2245                                 | PREDICTED: peptidyl-proly       | 847168271 | XP_01282723 | 7.24     | 137.99 | 8.08    | 5.37     | 15.93    | 86.62   | 11.78    | 7.33     | 7.4      | 6.86    | 3.81    | 0       |
| 2-3.c6401/1/2556.1                                | --                              | --        | --          | 5.9      | 3.97   | 2.15    | 3.76     | 4.36     | 2.44    | 1.84     | 2.43     | 3.98     | 1.08    | 1       | 0       |
| 2-3.c13434/4/2534                                 | PREDICTED: nebulin isofor       | 847166510 | XP_01282661 | 0        | 0      | 16.78   | 0        | 0        | 0       | 0        | 0        | 0        | 1.91    | 1.91    | 0       |
| 1-2.c34728/1/9427                                 | PREDICTED: serine/threonin      | 831290265 | XP_01267661 | 0        | 0      | 0       | 0        | 0        | 0       | 0        | 0        | 0        | 26.38   | 3.42    | 9.04    |
| 1-2.c1820/38/1504                                 | PREDICTED: elongation fac       | 573886958 | XP_00663126 | 0.18     | 25.11  | 1.42    | 2.12     | 0.71     | 10.15   | 2.77     | 1.18     | 2.73     | 0.37    | 0       | 0.16    |
| 1-2.c23496/2/1367                                 | --                              | --        | --          | 1.98     | 0      | 3.5     | 0        | 3.92     | 12.24   | 14.39    | 0.01     | 0        | 41.57   | 41.08   | 40.56   |
| 1-2.c39494/1/1466                                 | --                              | --        | --          | 20.14    | 0.66   | 11.46   | 17.14    | 18.48    | 2.44    | 11.86    | 14.03    | 18.27    | 2.28    | 6.68    | 7.71    |
| 3-6.c16351/1/2840.hypothetical protein N332_00    |                                 | 677416451 | KFQ22048.1  | 37.67    | 10.53  | 26.47   | 35.79    | 33.12    | 18.16   | 27.41    | 33.07    | 37.6     | 12.35   | 12.82   | 13.12   |
| 2-3.c30680/2/2103                                 | --                              | --        | --          | 9.88     | 5.88   | 16.69   | 4.6      | 13.15    | 3.27    | 4.08     | 11.58    | 5.19     | 0       | 1.08    | 1.67    |
| 1-2.c18074/1/1389                                 | --                              | --        | --          | 3.73     | 10.9   | 1.6     | 4.25     | 1.79     | 6.48    | 2.67     | 2.98     | 2.93     | 22.53   | 39.82   | 26.74   |
| 2-3.c7778/1/2540.2                                | --                              | --        | --          | 2.08     | 1.82   | 0       | 0        | 3.41     | 4.46    | 0        | 0        | 0        | 0       | 19.22   | 16.63   |
| 2-3.c33655/1/2412                                 | --                              | --        | --          | 2.78     | 95.18  | 5.61    | 13.62    | 4.44     | 26.43   | 12.2     | 6.02     | 19.35    | 146.85  | 328.94  | 126.32  |
| 1-2.c25734/1/6191                                 | PREDICTED: creatine kinase      | 556963392 | XP_00599165 | 17.09    | 2.68   | 25.47   | 23.38    | 25.36    | 10.32   | 18.6     | 18.16    | 26.55    | 7.53    | 7.33    | 9.05    |
| 2-3.c47638/1/1882                                 | PREDICTED: lamina-associ        | 847176929 | XP_01281093 | 1.5      | 11.8   | 1.31    | 1.83     | 1.32     | 4.85    | 0.71     | 0.87     | 1.76     | 18.34   | 27.99   | 7.92    |
| 2-3.c54359/1/2621                                 | --                              | --        | --          | 2.72     | 19.09  | 1.65    | 2.41     | 1.65     | 3.97    | 1.71     | 1.35     | 1.4      | 15.74   | 21.29   | 8.45    |
| 1-2.c33181/1/5736                                 | MGC64482 protein [Xenopus       | 54261690  | AAH84349.1  | 16306.93 | 468.08 | 9576.89 | 15362.97 | 15070.11 | 1318.89 | 13619.22 | 12840.7  | 17769.58 | 8221.06 | 7591.35 | 5796.72 |
| 2-3.c32221/1/1889                                 | PREDICTED: periodic trypte      | 301618674 | XP_00293873 | 8.23     | 16.12  | 4.77    | 2.87     | 4.07     | 10.46   | 5.59     | 4.17     | 3.06     | 0.73    | 0.61    | 1.83    |
| 3-6.c13151/2/2853                                 | --                              | --        | --          | 9.26     | 7.06   | 6.45    | 6.95     | 4.05     | 2.15    | 8.36     | 4.61     | 6.83     | 2.11    | 2.14    | 2.94    |
| 1-2.c49343/1/1553                                 | PREDICTED: SPRY domain          | 558216658 | XP_00613488 | 0.41     | 6.25   | 0.5     | 0.5      | 0.64     | 1.93    | 1.14     | 0.52     | 0.42     | 11.67   | 8.24    | 10.38   |
| 1-2.c29961/1/1540                                 | larval type I keratin [Rana cat | 134140868 | ABO61147.1  | 3.61     | 0.97   | 5.48    | 2.12     | 1.91     | 0.34    | 1.84     | 6.27     | 5.32     | 2.1     | 0.81    | 0.6     |
| 1-2.c32925/1/1281                                 | PREDICTED: mRNA turnover        | 641759304 | XP_00816553 | 19.24    | 44.23  | 13.61   | 10.37    | 12.5     | 28.14   | 17.71    | 10.02    | 10.42    | 4.42    | 4.69    | 3.99    |
| 2-3.c38913/1/2265                                 | mannosidase, alpha, class 2A    | 148226300 | NP_00108556 | 0        | 9.25   | 2.54    | 0.33     | 1.5      | 15.69   | 2.72     | 0.76     | 4.32     | 1.03    | 0       | 0       |

|                      |                                 |           |             |        |        |        |         |        |        |         |        |         |        |         |        |
|----------------------|---------------------------------|-----------|-------------|--------|--------|--------|---------|--------|--------|---------|--------|---------|--------|---------|--------|
| 1-2.c9285/1/1396     | Proteasome activator comple     | 226372158 | ACO51704.1  | 5.91   | 10.37  | 3.49   | 2.88    | 4.31   | 5.67   | 5.41    | 4.69   | 3.29    | 1.95   | 0.76    | 0      |
| 3-6.e7531/1/3246.2   | --                              | --        | --          | 17.57  | 5.55   | 9.29   | 12.58   | 15.16  | 7.85   | 25.01   | 10.97  | 14.64   | 169.52 | 127.56  | 149.34 |
| 2-3.e46822/1/2176.   | PREDICTED: G-protein cou        | 512840252 | XP_00293165 | 4.64   | 1.97   | 3.44   | 3.02    | 1.11   | 0.99   | 1.51    | 2.37   | 2.72    | 21.74  | 20.91   | 36.25  |
| 1-2.e50276/1/1755    | PREDICTED: unconventiona        | 602734247 | XP_00745245 | 0      | 0      | 0      | 0       | 0      | 0      | 0       | 0      | 0       | 4.56   | 2.88    | 0      |
| 1-2.e6280/10/1525    | methylglutaconyl-CoA hydra      | 186910214 | NP_00111953 | 35.46  | 32.7   | 23.66  | 32.03   | 27.52  | 23.76  | 26.51   | 27.59  | 28.93   | 9.76   | 8.54    | 16.26  |
| 1-2.e1861/39/1628    | PREDICTED: dnaJ homolog         | 847134514 | XP_01281987 | 58.49  | 59.19  | 41.95  | 41.82   | 36.1   | 0      | 0       | 23.29  | 8.95    | 0      | 0       | 3.34   |
| 1-2.c1924/24/1739    | PREDICTED: cytosol aminoj       | 847087076 | XP_01281622 | 0      | 0      | 0      | 3.32    | 0      | 0      | 0.3     | 0      | 0       | 1.24   | 4.96    | 4.29   |
| 1-2.e2309/3/1780     | PREDICTED: hypothetical p       | 297293110 | XP_00280415 | 0      | 0      | 0      | 1.62    | 0.28   | 0      | 0.42    | 1.46   | 0       | 2.97   | 1.7     | 3.43   |
| 1-2.e2378/27/1457    | plasminogen activator inhibit   | 47575766  | NP_00100122 | 1.05   | 170.9  | 105.58 | 104.48  | 0      | 0      | 0       | 0      | 0       | 0      | 0       | 23.76  |
| 1-2.e2474/13/1790    | PREDICTED: zinc finger pro      | 847114219 | XP_01281535 | 2.22   | 4.89   | 0      | 0       | 0      | 0      | 1.55    | 0      | 0       | 0      | 0       | 0      |
| 1-2.e2726/9/1437     | PERP, TP53 apoptosis effect     | 147901359 | NP_00108623 | 10.11  | 37.74  | 6.21   | 2.87    | 7.72   | 13.73  | 1.79    | 2.93   | 9.41    | 2.95   | 0       | 1.6    |
| 1-2.e2787/5/1778.1   | PREDICTED: phosphatidylet       | 641720285 | XP_00814978 | 1.06   | 9.8    | 5.03   | 0       | 5.92   | 2.23   | 0       | 0.2    | 0       | 0      | 0       | 0      |
| 1-2.e2807/5/1288     | NADP-dependent leukotriene      | 226371914 | ACO51582.1  | 3.48   | 11.18  | 4.91   | 1.47    | 3.93   | 1.71   | 4.56    | 1.24   | 1.3     | 0.28   | 0       | 0.23   |
| 1-2.e3023/1/1623     | hypothetical protein CAPTEI     | 443723767 | ELU12037.1  | 9.56   | 8.05   | 5.97   | 28.42   | 19.17  | 2.83   | 45.51   | 16.41  | 21.75   | 181.98 | 205.76  | 105.28 |
| 1-2.e3107/8/1674     | SUMO-activating enzyme sul      | 148227698 | NP_00108525 | 0      | 0      | 0      | 0.03    | 7.6    | 17.79  | 7.85    | 0.12   | 7.85    | 0      | 14.32   | 0      |
| 1-2.e3276/2/1636     | PREDICTED: exostosin-like       | 602651973 | XP_00743236 | 0      | 0      | 0      | 0       | 0.93   | 0.12   | 0       | 1.14   | 0.9     | 6.26   | 3.1     | 2.57   |
| 1-2.e3522/1/1244     | PREDICTED: keratin, type II     | 852796039 | XP_01288785 | 0      | 0      | 0      | 0       | 1.24   | 9.32   | 4.14    | 0      | 2.23    | 16.28  | 28.7    | 99.03  |
| 1-2.e3783/2/1431     | beclin-1 [Xenopus laevis]-gij   | 147903463 | NP_00108575 | 0      | 0.99   | 0      | 2.6     | 0      | 0      | 2.88    | 0      | 0.54    | 11.34  | 16.56   | 7.98   |
| 1-2.c4116/2/1427     | --                              | --        | --          | 0      | 0      | 0      | 0       | 14.17  | 15.72  | 12.6    | 18.92  | 27.27   | 0      | 32.78   | 0      |
| 1-2.e4603/1/1001     | Eukaryotic translation initiati | 226372362 | ACO51806.1  | 360.22 | 812.52 | 383.72 | 43.7    | 299.49 | 366.47 | 235.1   | 30.9   | 398.19  | 0      | 0       | 77.4   |
| 1-2.e4896/1/1495     | PREDICTED: BMP-2-induci         | 512815037 | XP_00293405 | 0      | 0      | 0      | 2.84    | 0      | 0      | 0       | 0.41   | 1.15    | 4.13   | 7.3     | 7.04   |
| 1-2.e5056/1/1837     | --                              | --        | --          | 4.16   | 2.88   | 0.92   | 0       | 0.22   | 0      | 1.01    | 0.03   | 0.56    | 0      | 0       | 0      |
| 1-2.e5277/1/1281     | keratin, type I cytoskeletal 18 | 148234658 | NP_00108081 | 91.39  | 246.52 | 74.16  | 16.52   | 0      | 0      | 0       | 0      | 0       | 0      | 0       | 0      |
| 1-2.e5359/8/1332     | 39S ribosomal protein L45, n    | 148235359 | NP_00107950 | 14.74  | 21.13  | 9.7    | 11.11   | 4.09   | 4.76   | 2.18    | 3.51   | 1.98    | 2.35   | 0.37    | 1.4    |
| 1-2.e6293/1/1210     | transglin-2 [Bufo gargarizan    | 635377487 | AHZ89387.1  | 20.21  | 2.01   | 6.63   | 42.19   | 2.42   | 11.45  | 85.08   | 12.75  | 32.13   | 277.79 | 275.8   | 160.02 |
| 1-2.e6592/3/1172     | PREDICTED: 60S ribosomal        | 742249727 | XP_01086661 | 0      | 800    | 143.51 | 13.4    | 0      | 0      | 0       | 0      | 0       | 0      | 0       | 0      |
| 1-2.e6649/7/1612     | cdc42 effector protein 2 [Xen   | 113931434 | NP_00103916 | 0      | 0      | 0      | 3.46    | 0.52   | 3.06   | 2.84    | 1.01   | 0       | 14.45  | 0.42    | 14.04  |
| 1-2.e6700/1/1307     | F-box only protein 46 [Xenof    | 348605211 | NP_00110647 | 0      | 0      | 0      | 5.68    | 0      | 0.97   | 0       | 0      | 9.57    | 5.04   | 5.04    | 15.14  |
| 1-2.e7025/2/1815     | PREDICTED: nucleolar GTP        | 512849296 | XP_00293522 | 0      | 0      | 0      | 7.32    | 0      | 0      | 0       | 2.41   | 0.11    | 9.22   | 10.76   | 9.13   |
| 1-2.e7305/6/1464     | DET1- and DDB1-associated       | 147903603 | NP_00108850 | 1.21   | 3.84   | 4.26   | 3.4     | 0.75   | 0      | 1.74    | 0      | 0       | 0      | 0       | 0      |
| 1-2.e7625/1/1347     | --                              | --        | --          | 2.67   | 0      | 0      | 3.6     | 2.49   | 4.27   | 9.19    | 4.35   | 7.76    | 50.01  | 52.34   | 35.84  |
| 1-2.e7698/2/1539     | dual specificity mitogen-activ  | 56118586  | NP_00100805 | 0      | 0      | 0      | 4.81    | 0      | 0      | 21.68   | 8.2    | 11.91   | 24.73  | 17.65   | 8.51   |
| 1-2.e8008/7/1320     | Tubulin alpha-1C chain [Lari    | 808859777 | KKF11870.1  | 0      | 0      | 0      | 11.44   | 0      | 0      | 13.73   | 0      | 11.2    | 25.81  | 11.65   | 20.03  |
| 1-2.e8010/2/1543     | --                              | --        | --          | 0      | 0      | 0      | 1.2     | 2.55   | 0      | 4.26    | 0      | 14.42   | 0      | 58.12   | 20.5   |
| 1-2.e8126/2/1605     | RecName: Full=MMS19 nucl        | 408407685 | QOV9L1.2    | 0      | 0      | 0      | 0       | 5.28   | 8.07   | 0.45    | 6.2    | 5.63    | 2.77   | 14.89   | 0.51   |
| 1-2.e8201/1/1713     | PREDICTED: protein FAM1         | 759159550 | XP_01137198 | 0      | 0      | 0      | 8.52    | 0      | 0.1    | 0       | 7.48   | 8.55    | 21.5   | 0       | 0      |
| 1-2.e8242/1/1734     | PREDICTED: collagen alpha       | 847166754 | XP_01282667 | 2.36   | 15.36  | 2.56   | 0.15    | 4.37   | 18.86  | 0       | 0      | 2.27    | 0.18   | 0       | 0      |
| 1-2.e8435/1/1348     | E3 ubiquitin-protein ligase ar  | 183986725 | NP_00111695 | 0      | 0.75   | 0      | 1.37    | 0      | 0      | 0       | 0.9    | 1.26    | 15.95  | 10.19   | 5.21   |
| 1-2.e8459/1/1276     | non-POU domain containing.      | 148235052 | NP_00108073 | 0      | 0      | 0      | 0       | 0      | 0.57   | 1.8     | 0.57   | 2.27    | 14.62  | 15.26   | 0      |
| 1-2.e8693/1/1427     | PREDICTED: uncharacterize       | 847110867 | XP_01281475 | 2.64   | 7.11   | 1.1    | 0       | 1.09   | 0      | 0       | 0      | 0       | 0      | 0       | 0      |
| 1-2.e8731/2/1724     | --                              | --        | --          | 7.48   | 6.61   | 3.83   | 20.76   | 13.6   | 5.76   | 99.83   | 5.8    | 7.77    | 158.12 | 110.61  | 113.87 |
| 1-2.e8818/2/1270     | myelin expression factor 2 [X   | 62859395  | NP_00101603 | 6.06   | 18.61  | 0      | 0       | 0      | 0      | 0       | 0      | 0       | 0.1    | 0       | 0      |
| 1-2.e8928/1/1605     | PREDICTED: canalicular mu       | 847167781 | XP_01282697 | 2.67   | 0      | 0      | 3.9     | 2.94   | 0      | 15.41   | 3.35   | 0       | 24.77  | 28.6    | 10.58  |
| 1-2.e9409/1/1412     | --                              | --        | --          | 7.4    | 0      | 0.91   | 11.01   | 7.86   | 18.42  | 17.29   | 11.31  | 18.06   | 55.97  | 74.49   | 50.26  |
| 1-2.e9415/2/1438     | PREDICTED: glycine amidir       | 874493879 | XP_01296181 | 21.15  | 0.94   | 13.17  | 0.08    | 3.64   | 0      | 0.39    | 3.88   | 0       | 0.16   | 0       | 0      |
| 1-2.e9519/1/1861.1   | actinin, alpha 1 [Xenopus lae   | 148224373 | NP_00108425 | 0      | 9.71   | 0      | 7.89    | 0      | 0      | 30.44   | 0.73   | 2.25    | 70.57  | 75.14   | 16.33  |
| 1-2.e9541/1/1457     | --                              | --        | --          | 5.46   | 0      | 2.14   | 11.91   | 6.22   | 14.92  | 23.55   | 4.81   | 5.21    | 48.14  | 63.08   | 52.35  |
| 1-2.e9850/1/1409     | DEAD (Asp-Glu-Ala-Asp) bc       | 148228442 | NP_00108267 | 1.02   | 0      | 0      | 0       | 2.69   | 1.67   | 0       | 0      | 9.83    | 19.91  | 22.56   | 10.15  |
| 1-2.e10634/12/1405E3 | ubiquitin-protein ligase K      | 148224862 | NP_00108570 | 4.28   | 1.96   | 1.03   | 0.01    | 2.12   | 0      | 0       | 0.83   | 0.5     | 0      | 0       | 0      |
| 1-2.e11312/1/1587    | --                              | --        | --          | 0      | 0      | 0      | 0       | 0      | 0.47   | 5.19    | 1.12   | 4.19    | 2.69   | 14.31   | 5.01   |
| 1-2.e11348/3/1430    | --                              | --        | --          | 0.98   | 1.29   | 0      | 3.01    | 0      | 0.3    | 3.9     | 1.5    | 3.88    | 9.66   | 19.08   | 23.1   |
| 1-2.e11718/1/1384    | PREDICTED: myosin-4 [Xet        | 847156920 | XP_01282446 | 76.43  | 27.63  | 54.98  | 0       | 19.01  | 2.61   | 0       | 0      | 0       | 0      | 0       | 0      |
| 1-2.e11779/1/4901.   | solute carrier family 35 meml   | 742627585 | NP_989845.2 | 15.84  | 4.63   | 8.68   | 9.7     | 2.87   | 2.2    | 4.18    | 7.96   | 4.12    | 0      | 0       | 0      |
| 1-2.e11964/1/1183    | 60S ribosomal protein L4 [Xe    | 284009776 | NP_00116500 | 6.13   | 6.21   | 5.22   | 1041.26 | 4.14   | 6.27   | 1156.09 | 933.43 | 1120.28 | 990.56 | 1706.83 | 0.95   |
| 1-2.e13126/2/1430    | glucocorticoid receptor [Xenc   | 456374    | CAA54804.1  | 0      | 0      | 0.07   | 4.02    | 0      | 0      | 5.39    | 0      | 1.3     | 10.22  | 4.67    | 6.32   |
| 1-2.e13137/1/1634    | --                              | --        | --          | 3.5    | 0.27   | 1.86   | 4.71    | 0      | 0.15   | 2.24    | 0.02   | 0.4     | 0      | 0       | 0      |
| 1-2.e13449/3/1457    | PREDICTED: succinate dehy       | 847123585 | XP_01281758 | 46.05  | 16.04  | 35.8   | 0.2     | 0      | 0      | 0       | 0      | 0       | 0      | 0.3     | 0      |
| 1-2.e13866/1/1614    | --                              | --        | --          | 6.68   | 3.84   | 6.63   | 1.66    | 3.96   | 3.89   | 2.33    | 0      | 5.09    | 1.13   | 0       | 0      |

|                    |                                 |           |             |       |        |       |        |       |        |        |       |        |        |         |        |
|--------------------|---------------------------------|-----------|-------------|-------|--------|-------|--------|-------|--------|--------|-------|--------|--------|---------|--------|
| 1-2.c13998/1/6518. | LOC431836 protein, partial [    | 62739321  | AAH94088.1  | 18.38 | 14.58  | 11.94 | 13.85  | 0.08  | 0.09   | 0      | 11.3  | 0.09   | 0      | 0       | 0      |
| 1-2.c14179/1/1285  | --                              | --        | --          | 0     | 106.61 | 35.24 | 0      | 0     | 0      | 0.26   | 0     | 14.29  | 0      | 0       | 0      |
| 1-2.c14278/2/1296  | LOC398627 protein [Xenopu       | 83318199  | AAI08446.1  | 0     | 0      | 0     | 16.09  | 0     | 0      | 5.87   | 0.53  | 14.56  | 66.7   | 85.87   | 0      |
| 1-2.c14632/1/1526  | zinc finger protein 326 [Xeno   | 213624144 | AAI70704.1  | 0     | 0      | 0     | 0      | 0     | 2.13   | 0      | 1.13  | 0      | 8.86   | 24.38   | 2.18   |
| 1-2.c14766/1/1683  | --                              | --        | --          | 0     | 0      | 0     | 4.94   | 0     | 3.07   | 3.63   | 3.11  | 0.54   | 6.83   | 10.62   | 4.88   |
| 1-2.c14799/1/6602. | basic leucine zipper and W2 c   | 147906588 | NP_00108025 | 11.51 | 14.63  | 0.03  | 0      | 18.34 | 6.3    | 8.84   | 2.37  | 0      | 0      | 0       | 0      |
| 1-2.c14883/2/1782  | --                              | --        | --          | 2.38  | 25.58  | 8.75  | 1.81   | 1.22  | 9.87   | 0.43   | 1.24  | 1.6    | 1.92   | 0.95    | 0      |
| 1-2.c15670/2/1498  | PREDICTED: COP9 signalo         | 512840748 | XP_00491444 | 9.89  | 0      | 6.6   | 0      | 4.61  | 0      | 0      | 0     | 0      | 0      | 0       | 0      |
| 1-2.c16496/3/1779  | PREDICTED: RNA-binding          | 686617738 | XP_00928583 | 3.54  | 14.52  | 2.68  | 2.16   | 1.61  | 4.28   | 1.77   | 1.56  | 1.97   | 0.06   | 0       | 0.67   |
| 1-2.c16856/1/1239  | PREDICTED: choline-phospi       | 817290393 | XP_01231551 | 0.16  | 0      | 0.12  | 19.27  | 17.73 | 13.91  | 0.23   | 16.85 | 0      | 42.12  | 35.01   | 0      |
| 1-2.c17151/3/1672  | PREDICTED: serine/threonir      | 512855246 | XP_00293928 | 0     | 0      | 0     | 0      | 0.89  | 0      | 1.25   | 0     | 0      | 3.99   | 0       | 5.56   |
| 1-2.c17296/1/1770  | PREDICTED: endogenous re        | 831566752 | XP_01273347 | 5.56  | 0      | 0     | 2.37   | 0.98  | 7.02   | 31.81  | 8.28  | 7.5    | 38.51  | 51.23   | 15.6   |
| 1-2.c17563/1/1509  | uncharacterized protein LOC     | 163914535 | NP_00110635 | 0     | 0.93   | 0     | 2.95   | 2.6   | 11.09  | 0.25   | 1.28  | 2.15   | 9.79   | 10.55   | 8.44   |
| 1-2.c17578/1/1449  | --                              | --        | --          | 0     | 0      | 0     | 0      | 0     | 1.04   | 0      | 0     | 0.62   | 12.28  | 0       | 10.97  |
| 1-2.c18047/1/1277  | TPA: hypothetical protein BC    | 296473158 | DAA15273.1  | 6.34  | 24.88  | 4.36  | 10.24  | 10.37 | 47.81  | 125.53 | 31.77 | 42.55  | 212.68 | 177.99  | 141.3  |
| 1-2.c18085/1/1797  | PREDICTED: G-rich sequen        | 847162878 | XP_01282565 | 1.36  | 13.64  | 7.38  | 0      | 2.09  | 0      | 0      | 0     | 0      | 0      | 0       | 0      |
| 1-2.c18218/1/1799  | PREDICTED: immunoglobul         | 847130950 | XP_01281911 | 0.69  | 4.67   | 0.95  | 1.13   | 2.14  | 0      | 0      | 0.95  | 2.93   | 0      | 0       | 0      |
| 1-2.c18232/7/1354  | high mobility group nucleoso    | 284795352 | NP_00108076 | 0     | 0      | 0     | 18.68  | 0     | 0      | 14.47  | 0     | 0      | 72.67  | 112.7   | 4.33   |
| 1-2.c18236/1/1755  | CCR4-NOT transcription con      | 147903571 | NP_00108665 | 0     | 0      | 0     | 0.52   | 0     | 0      | 0      | 3.03  | 2.35   | 2.86   | 0.12    | 4.67   |
| 1-2.c18764/5/1645  | PREDICTED: N-acetyltransf       | 301620503 | XP_00293960 | 2.48  | 5.88   | 1.1   | 1.8    | 0     | 1.28   | 0.28   | 0     | 1.87   | 0      | 0       | 0      |
| 1-2.c18786/1/1542  | PREDICTED: E3 ubiquitin-p       | 847166327 | XP_01282653 | 0     | 0      | 0     | 0      | 0     | 0.3    | 0.58   | 0     | 0      | 4.03   | 7.2     | 0.77   |
| 1-2.c19243/1/1384  | --                              | --        | --          | 0.58  | 0      | 0     | 0.31   | 0     | 1.78   | 8.66   | 4.06  | 1.47   | 32.4   | 75.98   | 14.4   |
| 1-2.c19308/2/1529  | E3 ubiquitin-protein ligase Rl  | 56118680  | NP_00100801 | 0     | 0      | 0     | 2.24   | 4.19  | 0.82   | 3.57   | 0     | 11.81  | 7.25   | 25.06   | 4.49   |
| 1-2.c19588/2/1553  | PREDICTED: spectrin alpha       | 847152581 | XP_01282324 | 0     | 0      | 0     | 0.8    | 0     | 0      | 4.52   | 2.49  | 6.47   | 16.08  | 13.47   | 0      |
| 1-2.c19787/2/1191  | --                              | --        | --          | 1.78  | 0      | 0     | 0      | 1.92  | 4.1    | 9.01   | 10.46 | 0      | 72.86  | 108.55  | 13.79  |
| 1-2.c19845/1/1595. | trifunctional enzyme subunit    | 45361293  | NP_989224.1 | 31    | 58.47  | 18.59 | 67.57  | 51.67 | 73.88  | 91.5   | 57.09 | 63.74  | 512.15 | 1037.87 | 454.32 |
| 1-2.c22059/2/1586  | RAD9 checkpoint clamp com       | 147905155 | NP_00108260 | 0     | 0      | 0     | 0      | 1.89  | 7.88   | 0      | 0     | 3.17   | 10.7   | 5.55    | 6.74   |
| 1-2.c22096/2/1329  | --                              | --        | --          | 0.8   | 0      | 0     | 5.44   | 0.45  | 3.18   | 2.84   | 0     | 4.32   | 15.03  | 23.19   | 16.53  |
| 1-2.c22108/3/1709  | uncharacterized protein LOC     | 73853872  | NP_00102751 | 0     | 0      | 0     | 0      | 0.11  | 0      | 0.42   | 1.73  | 1.28   | 2.7    | 2.46    | 2.86   |
| 1-2.c22413/1/1891  | PREDICTED: PHD finger pr        | 301606656 | XP_00293290 | 7.49  | 6.36   | 6.49  | 2      | 3.6   | 2.72   | 3.44   | 0     | 3.09   | 0.44   | 0       | 1.07   |
| 1-2.c22776/1/1189  | serine/threonine kinase 25 [X   | 148234581 | NP_00108494 | 0     | 0      | 0     | 2.15   | 0     | 0.03   | 0      | 2.46  | 0.66   | 6.39   | 21.09   | 6.08   |
| 1-2.c22893/1/1518  | --                              | --        | --          | 28.8  | 2.99   | 1.51  | 109.15 | 0     | 35.38  | 46.83  | 34.69 | 96.82  | 300.37 | 406     | 166.73 |
| 1-2.c23192/1/1245  | --                              | --        | --          | 0     | 0      | 0     | 0.9    | 0     | 0      | 2.93   | 0     | 0      | 12.1   | 4.6     | 3.08   |
| 1-2.c23384/3/1171  | ribonuclease H2, subunit A [    | 301171214 | NP_00118033 | 9.87  | 33.11  | 8.99  | 5.39   | 6.58  | 12.59  | 6.26   | 6.58  | 5.21   | 1.76   | 1.69    | 1.13   |
| 1-2.c23519/1/1716  | --                              | --        | --          | 0.14  | 0      | 0.28  | 3.01   | 0     | 0.72   | 3.14   | 1.36  | 0.08   | 6.97   | 8.43    | 10.73  |
| 1-2.c24124/1/1306  | PREDICTED: protein phosp        | 512847586 | XP_00491535 | 0     | 0      | 0     | 0.71   | 0     | 0      | 0.55   | 1.53  | 0      | 9.17   | 11.77   | 0      |
| 1-2.c24192/1/1350  | hypothetical protein H696_05    | 694544462 | XP_00949791 | 0     | 0      | 0.17  | 0      | 1.59  | 4.52   | 4.66   | 1.37  | 0      | 0      | 40.64   | 31.22  |
| 1-2.c24437/1/1525  | --                              | --        | --          | 0.94  | 0      | 0.26  | 2.2    | 1.21  | 5.44   | 4.01   | 0.96  | 0      | 19.61  | 22.68   | 6.59   |
| 1-2.c24509/1/1612  | solute carrier family 17 (acidi | 189217614 | NP_00112125 | 0     | 0.37   | 0     | 0      | 1.02  | 0.6    | 0      | 1.79  | 1.73   | 12.75  | 6.78    | 4.17   |
| 1-2.c24521/3/1543  | RecName: Full=Vimentin-4 [      | 138532    | P24790.1    | 59.73 | 36.15  | 28.9  | 24.18  | 0     | 3.56   | 0.96   | 2.15  | 0      | 1.32   | 0       | 0      |
| 1-2.c24732/1/1241  | RNA-binding motif protein, 7    | 148237346 | NP_00108498 | 0     | 0      | 0     | 0.98   | 0     | 0      | 1.62   | 0     | 0      | 17.35  | 28.28   | 2.12   |
| 1-2.c24904/1/1269  | PREDICTED: 5-azacytidine-       | 530611118 | XP_00529716 | 0     | 0      | 0     | 2.88   | 0.23  | 0      | 1.31   | 0     | 1.38   | 8.94   | 5.07    | 7.68   |
| 1-2.c25077/2/1228  | --                              | --        | --          | 0     | 0      | 0     | 0      | 0     | 33.18  | 9.39   | 9.7   | 0      | 10.39  | 5.8     | 0.76   |
| 1-2.c25343/1/4701. | NADH dehydrogenase subun        | 146149047 | YP_00116545 | 0     | 0      | 0     | 2.41   | 15.13 | 109.38 | 0.03   | 130.9 | 114.66 | 7.83   | 151.04  | 7.27   |
| 1-2.c25645/1/5760. | PREDICTED: 26S protease r       | 768377728 | XP_01158642 | 5.44  | 0      | 0     | 0      | 18.97 | 12.23  | 34.35  | 22.43 | 5.13   | 44.84  | 124.44  | 75.39  |
| 1-2.c25714/1/1398  | PREDICTED: ubiquitin-prot       | 768369251 | XP_01158196 | 6.03  | 2.73   | 2.28  | 1.37   | 0     | 0      | 0      | 0     | 0      | 0      | 0       | 0      |
| 1-2.c26009/1/1234  | dermatopontin precursor [Xer    | 71896109  | NP_00102555 | 1.03  | 3.8    | 4.29  | 0.33   | 1.3   | 2.82   | 0.73   | 0.91  | 0.8    | 0      | 0       | 0      |
| 1-2.c26194/1/1655  | PREDICTED: atrial natriuret     | 512816528 | XP_00491126 | 3.54  | 23.62  | 3.47  | 2.41   | 2.23  | 4.88   | 1.12   | 2.29  | 4.5    | 0.73   | 0.62    | 0.61   |
| 1-2.c26226/1/1835  | PREDICTED: mortality fact       | 847109511 | XP_01281436 | 0     | 0      | 0     | 0      | 0     | 0.34   | 3.44   | 0     | 0      | 7.29   | 6.43    | 0      |
| 1-2.c26261/1/1853  | PREDICTED: eukaryotic trar      | 821476296 | XP_01240160 | 0     | 6.81   | 1.73  | 0.56   | 0     | 0      | 1.2    | 4.11  | 0      | 0      | 0       | 0      |
| 1-2.c27359/4/1544  | PREDICTED: hydroxyacid-o        | 847134641 | XP_01281992 | 1.9   | 0.73   | 2.64  | 0      | 2.3   | 1.55   | 0.09   | 1.95  | 0      | 0      | 0       | 0      |
| 1-2.c28446/1/1507  | --                              | --        | --          | 3.8   | 0      | 0     | 2.31   | 4.75  | 1.86   | 4.41   | 2.83  | 5.16   | 23.27  | 38.34   | 26.18  |
| 1-2.c28556/1/1698  | --                              | --        | --          | 0     | 9.79   | 4.65  | 2.09   | 0     | 0      | 0      | 0     | 0      | 0      | 0       | 0      |
| 1-2.c28765/1/1262  | --                              | --        | --          | 3.25  | 0      | 0     | 0      | 4.7   | 9.85   | 9      | 5.31  | 4.99   | 34.85  | 31.86   | 24.57  |
| 1-2.c29523/1/3650. | PREDICTED: engulfment an        | 847168078 | XP_01282713 | 0     | 1.41   | 0.35  | 5.25   | 0     | 1.26   | 0      | 0.43  | 3.71   | 15.68  | 11.48   | 11.06  |
| 1-2.c29797/1/1694  | --                              | --        | --          | 0     | 0      | 0     | 3.69   | 0     | 0      | 0.57   | 0     | 0.22   | 0      | 6.25    | 10.36  |
| 1-2.c29852/1/1728  | unnamed protein product [On     | 642108707 | CDQ72316.1  | 2.23  | 0      | 0.78  | 2.96   | 8.14  | 29.87  | 18.32  | 6.47  | 20.15  | 65.16  | 64.51   | 52.41  |
| 1-2.c30108/1/1128  | Y-box-binding protein 3 [Xer    | 62751871  | NP_00101585 | 0     | 0      | 0     | 0      | 7.73  | 114.05 | 119.72 | 71.14 | 33.53  | 0      | 120.64  | 0      |



|                   |                                 |           |             |        |        |        |         |         |         |        |        |          |         |         |        |
|-------------------|---------------------------------|-----------|-------------|--------|--------|--------|---------|---------|---------|--------|--------|----------|---------|---------|--------|
| 1-2.c30194/1/1610 | PREDICTED: U2 small nucl        | 301617734 | XP_00293830 | 0.18   | 3.82   | 1.94   | 2.41    | 0       | 0       | 0      | 0      | 0.98     | 0       | 0       | 0      |
| 1-2.c30199/1/1680 | PREDICTED: glycylopeptide       | 301612194 | XP_00293556 | 9.74   | 0      | 4.08   | 0       | 0       | 0       | 0      | 0      | 0        | 0       | 0       | 0      |
| 1-2.c30266/1/1483 | --                              | --        | --          | 0      | 0      | 0      | 4.02    | 1.18    | 1.64    | 14.79  | 5.23   | 4.8      | 9.51    | 5.27    | 0.28   |
| 1-2.c3031/1/1646  | PREDICTED: creatine kinas       | 126344225 | XP_00136422 | 640.51 | 302.77 | 58.61  | 7776.97 | 8647.92 | 4826.56 | 717.59 | 31.21  | 10004.96 | 9545.14 | 7987.52 | 13.59  |
| 1-2.c30417/2/1610 | --                              | --        | --          | 0      | 0.08   | 0      | 0.87    | 0.72    | 0       | 0      | 0      | 1.51     | 14.43   | 21.88   | 2.38   |
| 1-2.c30861/1/1442 | clusterin preproprotein [Bufo   | 393717589 | AFN21430.1  | 0.58   | 0      | 0.9    | 3.44    | 5.07    | 1.19    | 18.42  | 0.28   | 2.11     | 17.48   | 17.68   | 25.01  |
| 1-2.c30862/1/1528 | PREDICTED: sushi, von Wil       | 847092934 | XP_01280886 | 7.07   | 23.94  | 5      | 4.96    | 3.86    | 9.66    | 1.85   | 5.04   | 6.01     | 0.73    | 0.79    | 1.31   |
| 1-2.c31022/1/1501 | --                              | --        | --          | 0.19   | 0      | 0      | 0       | 0       | 2.45    | 1.71   | 0.24   | 1.29     | 5.28    | 9.64    | 3.19   |
| 1-2.c31270/2/1503 | beta-secretase 2 precursor [X   | 213982845 | NP_00113555 | 0      | 0      | 0      | 5.77    | 0.48    | 1.63    | 4.15   | 3.17   | 0.24     | 6.41    | 8.05    | 7.23   |
| 1-2.c31468/1/1716 | --                              | --        | --          | 0      | 1.71   | 0.08   | 0.93    | 1.6     | 1.07    | 6.67   | 1.87   | 2.55     | 22.32   | 15.24   | 19.21  |
| 1-2.c32549/2/1578 | aldose reductase [Xenopus (S    | 58331962  | NP_00101113 | 0      | 7.07   | 4.14   | 0       | 0       | 0       | 0      | 0      | 0        | 0       | 0       | 0      |
| 1-2.c32622/4/1245 | PREDICTED: clathrin heavy       | 803113303 | XP_01204060 | 3.46   | 0      | 3.95   | 13.86   | 0.64    | 17.12   | 29.06  | 15.97  | 9.12     | 116.99  | 145.59  | 68.59  |
| 1-2.c33542/1/5773 | 60S ribosomal protein L3 [Xc    | 187607061 | NP_00112007 | 24.04  | 0      | 0      | 43.44   | 0       | 49.61   | 323.77 | 110.9  | 169.18   | 442.07  | 954.65  | 318.07 |
| 1-2.c33808/1/1498 | exportin-7-B [Xenopus laevis    | 148234429 | NP_00108934 | 0      | 0      | 0.05   | 3.83    | 0       | 0.34    | 5.77   | 0.73   | 1.06     | 12.82   | 15.54   | 8.81   |
| 1-2.c34613/1/1531 | tubulin folding cofactor A [X   | 148229733 | NP_00108536 | 0      | 0.13   | 0      | 11.05   | 0       | 0       | 4.23   | 16.63  | 3.98     | 37.7    | 41.46   | 10.19  |
| 1-2.c34868/1/1336 | --                              | --        | --          | 8.91   | 0      | 0      | 27.32   | 0       | 1.45    | 48.51  | 34.74  | 58.52    | 227.69  | 455.94  | 89.25  |
| 1-2.c34956/1/1639 | --                              | --        | --          | 0      | 0      | 0      | 17.59   | 0       | 0.82    | 7.62   | 0      | 6.98     | 40.46   | 10.19   | 0.62   |
| 1-2.c35050/2/1772 | PREDICTED: inositol-tetraki     | 847154713 | XP_01282392 | 2.19   | 5.37   | 0      | 2.01    | 0       | 0       | 3.13   | 0      | 0        | 0       | 0       | 0      |
| 1-2.c35382/2/1625 | --                              | --        | --          | 0      | 0      | 0      | 0       | 0       | 0.33    | 2.13   | 0      | 0        | 3.85    | 4.75    | 0      |
| 1-2.c35508/1/1439 | transposase [Salmo salar]       | 157285978 | ABV31710.1  | 0      | 0      | 0      | 1.02    | 0       | 0       | 1.17   | 0      | 0        | 7.69    | 4.91    | 0      |
| 1-2.c35759/1/3663 | .deoxyribonuclease II, lysosor  | 147904975 | NP_00108667 | 0      | 0.4    | 0      | 1.6     | 0.58    | 0.36    | 1.15   | 0      | 2.56     | 13.69   | 20.29   | 11.68  |
| 1-2.c36312/1/1263 | extended synaptotagmin-3 [X     | 58332580  | NP_00101136 | 0      | 0      | 0      | 0.19    | 0       | 0       | 1.9    | 0.74   | 1.11     | 6       | 9.36    | 0.58   |
| 1-2.c36321/1/1256 | --                              | --        | --          | 0.29   | 0      | 0      | 0.9     | 0.28    | 1.43    | 5.42   | 2.96   | 0        | 7.08    | 9.13    | 6.91   |
| 1-2.c36512/1/1490 | coatome protein complex, su     | 148235681 | NP_00108357 | 1.15   | 0      | 4.42   | 4.46    | 0.87    | 7.08    | 2.64   | 8.64   | 5.27     | 43.59   | 58.98   | 36.61  |
| 1-2.c36592/1/1195 | PREDICTED: heterogeneous        | 847118781 | XP_01281673 | 2.46   | 0      | 0      | 3.46    | 0       | 1.49    | 8.31   | 3.08   | 0        | 32.09   | 18.7    | 12.95  |
| 1-2.c36865/1/1469 | UBA-like domain-containing      | 58331988  | NP_00101114 | 0      | 11.75  | 3.55   | 3.05    | 0       | 0       | 0      | 0      | 0        | 0       | 0       | 0      |
| 1-2.c37145/5/1652 | PREDICTED: fragile X ment       | 637372583 | XP_00322991 | 154.07 | 146.23 | 153.56 | 118.83  | 0       | 1.5     | 0.34   | 126.12 | 0.06     | 0       | 0       | 0      |
| 1-2.c37965/1/5025 | .uncharacterized protein LOC    | 89886093  | NP_988922.2 | 0      | 0      | 0      | 4.97    | 0       | 2.88    | 5.19   | 9.86   | 7.79     | 33.28   | 66.62   | 11.92  |
| 1-2.c38197/1/1445 | Vasculin [Tupaia chinensis]     | 444725091 | ELW65670.1  | 0      | 0      | 0      | 0       | 0.78    | 0.45    | 4.22   | 2.27   | 5.52     | 9.71    | 7.23    | 5.12   |
| 1-2.c38283/1/1458 | PREDICTED: insulin receptc      | 301615358 | XP_00293713 | 0      | 10.53  | 2.85   | 2.25    | 0.22    | 0.12    | 1.4    | 0      | 0        | 0       | 0       | 0      |
| 1-2.c38353/2/1557 | NADH dehydrogenase subun        | 146149047 | YP_00116545 | 0      | 204.54 | 25.42  | 0       | 0       | 0       | 0.86   | 0      | 0        | 0       | 0       | 0.16   |
| 1-2.c38552/1/3604 | PREDICTED: creatine kinas       | 532105376 | XP_00533827 | 0      | 0      | 0      | 6938.98 | 6970.2  | 3900.09 | 0      | 0      | 6148.8   | 6457.75 | 7620.4  | 0      |
| 1-2.c38635/1/1503 | --                              | --        | --          | 0      | 1.91   | 0.4    | 0.75    | 38.91   | 1.13    | 50.34  | 40.67  | 0.54     | 29      | 56.03   | 38.4   |
| 1-2.c38664/1/1698 | elongation of very long chain   | 148235901 | NP_00108037 | 0      | 0      | 0      | 5.87    | 4.11    | 1.67    | 4.29   | 0      | 4.04     | 12.87   | 31.15   | 4.92   |
| 1-2.c38716/1/1772 | PREDICTED: myomegalin-li        | 591373231 | XP_00706131 | 0      | 0.01   | 0      | 7.45    | 0       | 0       | 11.39  | 0.04   | 14.92    | 0       | 0       | 2.43   |
| 1-2.c38746/1/1248 | PREDICTED: protein polybn       | 594652736 | XP_00717481 | 0      | 0      | 0      | 0       | 0.29    | 0       | 0.78   | 0.67   | 0.07     | 2.48    | 4.68    | 6.61   |
| 1-2.c38760/1/7715 | --                              | --        | --          | 5.89   | 0      | 0      | 10.1    | 3.71    | 5.08    | 25.33  | 15.73  | 12.93    | 109.19  | 213.01  | 49.52  |
| 1-2.c38766/1/1595 | sorting nexin-30 [Xenopus la    | 148227022 | NP_00108952 | 0      | 0      | 0      | 0       | 2.56    | 2.02    | 0.19   | 2.27   | 4.71     | 4.42    | 0       | 8.16   |
| 1-2.c39024/1/1701 | PREDICTED: integral memb        | 514711338 | XP_00501156 | 1.84   | 0      | 0      | 3.86    | 0.79    | 3.54    | 4.26   | 6.37   | 2.4      | 20.28   | 14.62   | 19.89  |
| 1-2.c39406/1/1345 | PREDICTED: LOW QUALI            | 696993200 | XP_00956364 | 0      | 0      | 0      | 4.13    | 0       | 0       | 0      | 0      | 5.53     | 17.17   | 18.37   | 3.35   |
| 1-2.c39407/1/5416 | PREDICTED: zinc finger pro      | 847116590 | XP_01281596 | 7.26   | 12.12  | 5.23   | 1.98    | 6.95    | 2.41    | 0.32   | 0      | 0.11     | 0       | 0       | 0      |
| 1-2.c39929/1/1297 | PREDICTED: non-syndromic        | 847139928 | XP_01282103 | 0      | 0      | 0      | 60.26   | 0       | 0       | 69.67  | 0      | 55.38    | 0       | 145.21  | 50.43  |
| 1-2.c39959/1/1174 | --                              | --        | --          | 10.49  | 19.02  | 0      | 1.36    | 1.11    | 0       | 0.9    | 0.03   | 0        | 0       | 0       | 0      |
| 1-2.c40139/1/1298 | oxidative-stress responsive 1   | 148228567 | NP_00108693 | 0.01   | 0      | 0      | 4.92    | 0       | 0       | 8.14   | 0      | 2.46     | 22.23   | 31.26   | 6.52   |
| 1-2.c40217/1/1423 | PREDICTED: myosin-4 [Xer        | 847156920 | XP_01282446 | 0      | 0      | 0      | 0       | 0       | 0.55    | 21.82  | 0      | 0        | 13.69   | 0       | 25.98  |
| 1-2.c40396/1/1396 | serine/threonine-protein phos   | 58332004  | NP_00101115 | 2.07   | 0      | 2.4    | 5.6     | 3.61    | 1.65    | 6.92   | 1.88   | 4.73     | 36.79   | 46.05   | 20.19  |
| 1-2.c40418/1/1465 | --                              | --        | --          | 1.35   | 0      | 0      | 1.7     | 0       | 2.55    | 3.96   | 1.8    | 7.52     | 15.06   | 19.71   | 13.38  |
| 1-2.c40426/1/1602 | developmentally regulated G     | 89269049  | CAJ81597.1  | 0      | 0      | 0      | 2.5     | 0       | 0       | 14.97  | 2.74   | 0        | 29.83   | 52.84   | 7.76   |
| 1-2.c40458/1/3483 | eukaryotic translation initiati | 45360615  | NP_988980.1 | 0      | 0      | 0      | 7.67    | 0       | 13.8    | 19.24  | 9.68   | 18.29    | 53.62   | 133.04  | 32.91  |
| 1-2.c40803/2/1179 | bhmt protein [Xenopus (Silur    | 58618891  | AAH89235.1  | 0      | 0      | 0      | 2.7     | 0       | 0       | 1.02   | 0      | 5.62     | 19.97   | 14.62   | 10.43  |
| 1-2.c41257/1/1743 | cytosol aminopeptidase [Xen     | 58331950  | NP_00101112 | 3.95   | 11.46  | 1.29   | 0       | 0.94    | 5.83    | 0      | 4.64   | 0        | 0       | 0       | 0      |
| 1-2.c41649/1/1198 | PREDICTED: filamin-A isof       | 637264717 | XP_00810205 | 59.89  | 35.83  | 37.79  | 121.3   | 51.07   | 51.45   | 252.81 | 67.04  | 91.67    | 781.12  | 1269.13 | 623.49 |
| 1-2.c41668/1/1292 | MHC class I antigen [Rana pi    | 6090957   | AAF03409.1  | 5.82   | 2.1    | 1.41   | 2.9     | 0       | 0       | 0      | 1.13   | 0        | 0       | 0       | 0      |
| 1-2.c42987/1/1355 | PREDICTED: phosphatidylin       | 301607217 | XP_00293320 | 0.01   | 0      | 0      | 0       | 0.83    | 0       | 0.48   | 0      | 1.57     | 4.49    | 9.15    | 2.7    |
| 1-2.c43180/1/1416 | splicing factor 3A subunit 3 [  | 62859201  | NP_00101711 | 1.09   | 19.69  | 3.4    | 0       | 3.81    | 1.65    | 0      | 0      | 0        | 0       | 0       | 0      |
| 1-2.c43595/1/1680 | PREDICTED: protein TFG is       | 847099504 | XP_01281226 | 0.07   | 0      | 0      | 0       | 5.12    | 4.14    | 1.61   | 3.87   | 3.12     | 3       | 0       | 0      |
| 1-2.c44170/2/1801 | Three prime repair exonuclea    | 226372920 | ACO52085.1  | 0      | 0      | 0      | 0       | 3.72    | 0       | 1.62   | 4.79   | 3.83     | 0       | 0       | 21.14  |
| 1-2.c44192/1/1786 | Na-K-2Cl cotransporter 1 [Xc    | 147904042 | NP_00109133 | 0      | 0      | 0      | 0       | 0.65    | 0.17    | 3.9    | 0.4    | 0.28     | 10.51   | 3.72    | 27.65  |

|                    |                                 |           |             |       |       |       |        |       |        |        |        |        |        |        |        |
|--------------------|---------------------------------|-----------|-------------|-------|-------|-------|--------|-------|--------|--------|--------|--------|--------|--------|--------|
| 1-2.c44229/1/1777  | PREDICTED: hyaluronidase        | 525010756 | XP_00505300 | 10.25 | 1.79  | 2.85  | 6.8    | 11.27 | 1.19   | 17.01  | 5.44   | 8.54   | 62.43  | 50.32  | 162.46 |
| 1-2.c44441/1/1501  | YTH domain-containing fami      | 45361633  | NP_989392.1 | 0     | 0     | 0     | 0      | 0     | 0.94   | 2.83   | 0      | 0      | 14.26  | 30.98  | 0      |
| 1-2.c45680/1/1480  | PREDICTED: isoprenoid syn       | 847135289 | XP_01282013 | 6.97  | 5.69  | 3.28  | 1.99   | 0     | 2.87   | 2.38   | 1.32   | 0      | 0.76   | 0      | 0      |
| 1-2.c45772/1/1388  | PREDICTED: catenin delta-1      | 847116258 | XP_01281585 | 3.91  | 8.53  | 3.29  | 11.08  | 11.55 | 6.19   | 30.65  | 3.85   | 16.03  | 89.72  | 112.59 | 77.27  |
| 1-2.c45907/1/1245  | PREDICTED: F-actin-cappin       | 733918801 | XP_0107212f | 0     | 0     | 0     | 22.86  | 3.16  | 25.93  | 34.61  | 23.18  | 43.1   | 129.94 | 135.27 | 19.83  |
| 1-2.c46482/1/1381  | PREDICTED: max dimerizat        | 847110099 | XP_0128145e | 0     | 0     | 0     | 0.95   | 0     | 2.02   | 0      | 0      | 1.61   | 11.86  | 13.77  | 0.48   |
| 1-2.c46592/1/1839  | PREDICTED: collagen alpha       | 847135925 | XP_01282037 | 0     | 0     | 0     | 0      | 0     | 618.47 | 48.94  | 40.77  | 46.28  | 60.64  | 39.94  | 46.44  |
| 1-2.c46701/2/1318  | heat shock protein 90kDa alp    | 62858821  | NP_00101628 | 0     | 0.46  | 0.77  | 3.17   | 0     | 8.97   | 11.26  | 0.42   | 2.71   | 30.81  | 12.56  | 43.03  |
| 1-2.c46780/1/1502  | glycine amidinotransferase (L   | 89272889  | CAJ82904.1  | 0.74  | 15.3  | 4.58  | 0      | 0.88  | 21.7   | 0      | 1.77   | 1.13   | 0      | 0      | 0      |
| 1-2.c46829/2/1770  | aconitase 2, mitochondrial [X   | 147904130 | NP_0010862f | 0.01  | 0     | 0     | 0      | 0     | 0.22   | 0.49   | 0      | 0      | 8.92   | 0      | 5.51   |
| 1-2.c47081/2/1303  | platelet-derived growth factor  | 71896169  | NP_00102558 | 0     | 0     | 0     | 4.66   | 0     | 0      | 2.73   | 2.15   | 2      | 8.24   | 2.4    | 3.75   |
| 1-2.c47384/2/1221  | uncharacterized protein LOC:    | 89886093  | NP_988922.2 | 0     | 0     | 0     | 2.04   | 0     | 0      | 3.51   | 3.96   | 2.97   | 11.43  | 18.62  | 13.68  |
| 1-2.c47456/2/1214  | PREDICTED: ATP synthase         | 557324504 | XP_00603528 | 0     | 0     | 0     | 44.35  | 0     | 0      | 101.36 | 10.53  | 71.37  | 113.21 | 126.96 | 130.89 |
| 1-2.c47899/5/1554  | PREDICTED: ras-related pro      | 73968729  | XP_851250.1 | 0     | 0     | 0     | 3.75   | 0     | 0      | 0      | 0      | 5.23   | 19.5   | 18.23  | 14.91  |
| 1-2.c48260/1/1383  | --                              | --        | --          | 2.12  | 0     | 0     | 4.7    | 12.78 | 9.45   | 20.42  | 0.89   | 15.97  | 25.73  | 42.97  | 18.94  |
| 1-2.c48323/1/1761  | PREDICTED: leucine-rich re      | 847134249 | XP_01281975 | 0     | 0     | 0.01  | 1.03   | 2.6   | 0.58   | 2.27   | 0.41   | 3.23   | 4.93   | 3.25   | 9.14   |
| 1-2.c48994/1/1754  | --                              | --        | --          | 0     | 0     | 0     | 0      | 17.18 | 30.04  | 28.1   | 16.19  | 18.17  | 0      | 45.09  | 0      |
| 1-2.c49346/1/1508  | heterogeneous nuclear ribonu    | 45361501  | NP_989327.1 | 10    | 38.48 | 4.72  | 11.33  | 7.2   | 2.88   | 0.55   | 1.33   | 8.04   | 0      | 0      | 3.69   |
| 1-2.c49385/1/1794  | protein MON2 homolog [Xer       | 148222438 | NP_00108578 | 0     | 0     | 0     | 1.03   | 0     | 0      | 0.9    | 3.11   | 1.49   | 1.03   | 0      | 0      |
| 1-2.c49487/1/1590  | Tubulin alpha-1C chain [Lari    | 808859777 | KKF11870.1  | 3.28  | 0.93  | 1.65  | 12.41  | 4.28  | 0.46   | 21.31  | 2.49   | 2.38   | 72.21  | 13.97  | 56.8   |
| 1-2.c49530/1/1152  | inositol monophosphatase 3 [    | 147899181 | NP_00108451 | 0     | 0     | 0     | 0.43   | 0     | 0.65   | 0      | 0      | 1.78   | 36.13  | 47.55  | 0      |
| 1-2.c49532/1/1231  | growth hormone inducible tra    | 148231426 | NP_00108005 | 0     | 0     | 0     | 5.56   | 0     | 0      | 11.03  | 0.07   | 5.53   | 5.5    | 3      | 5.25   |
| 1-2.c49644/1/1803  | uncharacterized protein LOC     | 148234787 | NP_00109077 | 2.46  | 3.02  | 1.63  | 1.54   | 0     | 0.05   | 0.12   | 1.14   | 0      | 0      | 0      | 0      |
| 1-2.c49682/1/1278  | --                              | --        | --          | 0     | 5.81  | 2.59  | 0.03   | 2.63  | 31.36  | 1.21   | 0      | 1.37   | 0      | 0      | 0      |
| 1-2.c49930/1/1754  | protein PBDC1 [Xenopus (Si      | 62858545  | NP_0010163e | 0.79  | 12.56 | 1.28  | 0.28   | 0.23  | 0      | 0      | 0.01   | 0      | 0      | 0      | 0      |
| 1-2.c50028/1/1631  | PREDICTED: STAM-bindin          | 847108531 | XP_01281402 | 0     | 0     | 0     | 2.67   | 0     | 0      | 3.24   | 0      | 1.46   | 4.74   | 5.07   | 0      |
| 1-2.c50082/1/1656  | PREDICTED: poly(rTC)-bindi      | 847099224 | XP_01281215 | 51.32 | 41.81 | 0     | 0      | 0     | 0      | 1.3    | 3.72   | 0      | 0      | 0      | 0      |
| 1-2.c50137/1/1939  | --                              | --        | --          | 0     | 0     | 0     | 0.07   | 0.06  | 0      | 0.04   | 0.18   | 0      | 3.48   | 4.06   | 1.34   |
| 1-2.c50171/1/1882  | PREDICTED: filamin-A-inte       | 301613504 | XP_00293624 | 2.39  | 1.68  | 1.38  | 0.42   | 0.56  | 3.18   | 0.4    | 2.07   | 0      | 0      | 0      | 0      |
| 1-2.c50280/1/1366  | --                              | --        | --          | 2.21  | 1.65  | 0     | 1.87   | 1.55  | 1.96   | 5.42   | 4.17   | 7.03   | 28.34  | 18.16  | 28.83  |
| 1-2.c50528/1/1412  | PREDICTED: semaphorin-3f        | 612053402 | XP_0075041e | 14.69 | 83.41 | 15.08 | 12.34  | 9.09  | 13.5   | 4.59   | 8.19   | 16.84  | 4.71   | 1.86   | 1.81   |
| 1-2.c50594/1/1535  | Ras suppressor protein 1, part  | 677553639 | KFR13401.1  | 0     | 0.83  | 0     | 0      | 14.26 | 21.54  | 0      | 0      | 15.1   | 1.07   | 33.67  | 33.68  |
| 1-2.c50644/1/1355  | --                              | --        | --          | 6.42  | 30.82 | 13.35 | 4.79   | 3.48  | 38.51  | 1.25   | 5.34   | 3.49   | 0      | 1.19   | 1.32   |
| 1-2.c50942/4/1445  | Complement factor B [Xenop      | 213625177 | AAI69984.1  | 0     | 0     | 0.16  | 0      | 3.43  | 7.51   | 0.14   | 0      | 8.4    | 9.3    | 12.82  | 2.06   |
| 1-2.c50953/9/1302  | PREDICTED: protein disulfu      | 697460798 | XP_0096670e | 0     | 0     | 0     | 47.04  | 0.65  | 0      | 18.05  | 40.22  | 47.53  | 136.44 | 78.63  | 39.79  |
| 1-2.c51067/2/1543  | Unknown (protein for IMAG       | 189442732 | AAI67693.1  | 0     | 0     | 0     | 0.82   | 6.53  | 8.67   | 0      | 2      | 0.42   | 0      | 0      | 21.16  |
| 1-2.c51308/10/1472 | PREDICTED: myosin-4 [Xer        | 847156920 | XP_0128244e | 0     | 0     | 0     | 9.08   | 41.76 | 0      | 1.55   | 125.94 | 216.2  | 19.73  | 7.33   | 0      |
| 1-2.c51922/5/1347  | keratin, type I cytoskeletal 18 | 148234658 | NP_00108081 | 0     | 8.13  | 0     | 35.1   | 0     | 0      | 50.74  | 0      | 49.03  | 238.84 | 532.89 | 164.26 |
| 1-2.c52054/3/1322  | lactate dehydrogenase A [Xer    | 148227690 | NP_0010807c | 37.1  | 0     | 0     | 620.24 | 0     | 0      | 267.39 | 0      | 507.04 | 281.13 | 228.11 | 153.17 |
| 1-2.c52185/9/1457  | uncharacterized protein LOC     | 147905311 | NP_0010906c | 0     | 0     | 1.66  | 4.54   | 2.99  | 2.24   | 6.91   | 2.85   | 0.91   | 25.39  | 14.34  | 34.65  |
| 1-2.c52328/2/1324  | RING finger protein 10 [Xen     | 148231949 | NP_00108983 | 0     | 0     | 0     | 5.14   | 0     | 0      | 1.89   | 1.31   | 0      | 22.47  | 39.1   | 0      |
| 1-2.c52366/8/1595  | PREDICTED: tubulin beta-5       | 558136461 | XP_00611755 | 2.47  | 34.12 | 5.75  | 0.59   | 0     | 4.23   | 0      | 0      | 0      | 0      | 2.89   | 3.48   |
| 1-2.c52455/2/1393  | Keratin, type II cytoskeletal c | 676246754 | KFO10626.1  | 0     | 0     | 0     | 87.94  | 0     | 0      | 0      | 0      | 76.12  | 61.55  | 94.44  | 46.18  |
| 2-3.c1310/75/2380  | Copz1 protein, partial [Xenop   | 29126980  | AAH47988.1  | 2.1   | 4.81  | 1.6   | 0      | 0     | 0      | 0      | 0      | 0      | 0      | 0      | 0      |
| 2-3.c1485/3/12623  | nuclear pore complex protein    | 47498074  | NP_998879.1 | 5.35  | 21.5  | 2.3   | 2.37   | 3.97  | 9.52   | 1.62   | 2.71   | 1.92   | 0.77   | 0.38   | 1.09   |
| 2-3.c1543/8/2309   | PREDICTED: serine/threonin      | 821122370 | XP_01238372 | 0     | 0     | 0     | 3.61   | 0     | 0      | 4.16   | 0.15   | 3.85   | 3.5    | 0      | 0      |
| 2-3.c1606/43/2098  | heat shock 70kDa protein 9 (t   | 148228693 | NP_0010801e | 6.18  | 7.78  | 0     | 0      | 11.51 | 1.56   | 0      | 0      | 0      | 0      | 0      | 0      |
| 2-3.c1632/54/2057  | heterogeneous nuclear ribonu    | 45361501  | NP_989327.1 | 13.58 | 25.51 | 12.68 | 0      | 10.86 | 0      | 0.23   | 4.45   | 0      | 0      | 0      | 0      |
| 2-3.c1880/8/2155   | protein tyrosine phosphatase    | 56605916  | NP_0010084e | 0     | 0     | 0     | 8.76   | 12.89 | 0      | 7.31   | 0      | 5.65   | 3.97   | 0      | 0      |
| 2-3.c1994/19/2575  | probable lysosomal cobalami     | 118403984 | NP_00107218 | 0     | 0     | 0     | 0      | 4.51  | 1.9    | 0      | 3.32   | 0      | 4.75   | 4.99   | 0      |
| 2-3.c2145/23/2018  | PREDICTED: pre-mRNA 3'-         | 847088059 | XP_0128194e | 10.02 | 13.75 | 3.94  | 3.41   | 0.55  | 0.21   | 3.01   | 0.89   | 0      | 0      | 0      | 1.42   |
| 2-3.c2790/3/2291.1 | uromodulin-like protein type    | 802176571 | BAR42254.1  | 1.65  | 0     | 1.31  | 2.71   | 3.83  | 0      | 74.38  | 1.53   | 0      | 42.96  | 13.53  | 84.52  |
| 2-3.c3209/1/2397.1 | NPL4 homolog, ubiquitin rec     | 147898562 | NP_00108042 | 18.77 | 0     | 7.64  | 1.08   | 13.63 | 1.22   | 0      | 3.15   | 0.83   | 0      | 0      | 0      |
| 2-3.c3339/1/2486   | PREDICTED: myocilin [Xen        | 512836045 | XP_00293415 | 0     | 0     | 0.23  | 0      | 14.28 | 0      | 13.99  | 15.06  | 0      | 2.22   | 10.5   | 11.56  |
| 2-3.c3631/1/1939   | --                              | --        | --          | 14.86 | 5.97  | 18.01 | 21.88  | 0     | 0      | 0      | 1.44   | 0      | 0      | 0      | 0      |
| 2-3.c4256/1/2408   | --                              | --        | --          | 0     | 2.87  | 1.53  | 2.5    | 1.18  | 0      | 0      | 2.61   | 0      | 0      | 0      | 0      |
| 2-3.c5010/1/2465.1 | von Willebrand factor precur    | 372273431 | NP_00124321 | 0     | 0     | 0     | 0.16   | 0     | 0      | 0      | 0.53   | 0.41   | 2.37   | 5.26   | 2.77   |
| 2-3.c5642/2/2090   | glutamyl-prolyl-tRNA synthe     | 189217812 | NP_00112134 | 6.66  | 10.83 | 10.61 | 8.39   | 0.01  | 20.11  | 0.08   | 16.64  | 18.21  | 2.4    | 0      | 0      |

|                      |                                |           |             |       |        |       |       |        |        |        |       |       |        |        |         |
|----------------------|--------------------------------|-----------|-------------|-------|--------|-------|-------|--------|--------|--------|-------|-------|--------|--------|---------|
| 2-3.c6388/1/2165.1   | mitochondrial ribosomal prot   | 148236950 | NP_00107977 | 2.76  | 10.04  | 6.27  | 4.15  | 0.93   | 3.41   | 0      | 0     | 3.23  | 0      | 0      | 0       |
| 2-3.c6414/1/2370     | --                             | --        | --          | 7.76  | 27.99  | 3.9   | 5.07  | 3.86   | 54.69  | 1.51   | 2.82  | 3.55  | 0.54   | 1.35   | 1.52    |
| 2-3.c6552/3/2122     | PREDICTED: A-kinase anch       | 512820714 | XP_00293685 | 4.17  | 6.01   | 0.9   | 0.03  | 0      | 0      | 0      | 4.73  | 0     | 0      | 0      | 1.13    |
| 2-3.c6723/3/2362     | splicing factor proline/glutam | 189230206 | NP_00112142 | 15.35 | 23.33  | 8.79  | 0     | 0      | 0      | 2.7    | 0     | 0     | 0.01   | 1.72   | 0.28    |
| 2-3.c6821/1/2213     | lysyl oxidase homolog 1 prec   | 156717522 | NP_00109630 | 1.91  | 7.47   | 2.3   | 0     | 0.7    | 0.04   | 0      | 0.62  | 0.08  | 0      | 0.01   | 0.02    |
| 2-3.c7532/1/1940     | PREDICTED: nebulin isoform     | 847166508 | XP_01282661 | 57.87 | 34.67  | 42.49 | 5.62  | 107.39 | 0.77   | 114.58 | 51.98 | 16.33 | 3.15   | 4.58   | 9.37    |
| 2-3.c7552/1/2102.1   | protein archease [Xenopus (S   | 62857601  | NP_00101675 | 1.92  | 1.96   | 1.07  | 1.25  | 3.65   | 0      | 0      | 0.81  | 0     | 0      | 0      | 0       |
| 2-3.c7590/1/1927     | PREDICTED: CXXC-type zi        | 847088379 | XP_01282033 | 1.89  | 5.27   | 1.36  | 0     | 1.14   | 0.74   | 0.55   | 0.64  | 0.3   | 0.23   | 0      | 0       |
| 2-3.c7867/2/2274     | PREDICTED: F-box only prc      | 543358887 | XP_00552332 | 0     | 0      | 0     | 0     | 2.8    | 1.74   | 2.66   | 1.83  | 4.52  | 1      | 2.02   | 6.42    |
| 2-3.c9076/1/2475.2   | --                             | --        | --          | 0     | 0      | 0     | 0     | 1.64   | 0.74   | 0      | 3.63  | 0     | 13.98  | 67.64  | 12.98   |
| 2-3.c9310/4/2058     | PREDICTED: guanine nucleot     | 560925767 | XP_00618906 | 2.96  | 1.66   | 1.47  | 0     | 0.24   | 0.66   | 0      | 0     | 0     | 0.53   | 0      | 4.2     |
| 2-3.c9385/1/2521.2   | PREDICTED: D-beta-hydrox       | 301616891 | XP_00293787 | 2.69  | 13.27  | 6.03  | 2.55  | 2.54   | 6.17   | 3.96   | 4.05  | 2.06  | 0      | 0      | 0.39    |
| 2-3.c9995/2/2333     | --                             | --        | --          | 0     | 0      | 0     | 0.68  | 0.46   | 0      | 3.26   | 0.78  | 0     | 9.38   | 7.45   | 1       |
| 2-3.c10008/1/1996    | ethanolamine-phosphate phos    | 147905107 | NP_00108663 | 1.24  | 0.36   | 1.81  | 4.14  | 10.7   | 4.45   | 20.7   | 6.4   | 1.14  | 40.79  | 31.14  | 65.5    |
| 2-3.c10257/1/2247    | protein phosphatase 2, regula  | 148234757 | NP_00108413 | 0     | 0      | 0     | 1.53  | 0      | 0      | 0.56   | 0     | 0.75  | 2.93   | 3.69   | 0       |
| 2-3.c10445/16/2077   | zinc finger protein 36, C3H1   | 147901333 | NP_00108188 | 0     | 37.89  | 8.47  | 0     | 4.67   | 0      | 0      | 0     | 0     | 0      | 0      | 0       |
| 2-3.c10508/2/2043.-- | --                             | --        | --          | 12.35 | 0      | 0.79  | 21.27 | 19.98  | 2.72   | 238.64 | 10.77 | 4.2   | 695.42 | 82.99  | 1276.27 |
| 2-3.c11803/12/2529   | angiopoietin-related protein 7 | 156717416 | NP_00109624 | 1.79  | 17.53  | 8.13  | 0.65  | 1.98   | 28.55  | 0.26   | 1.23  | 1.97  | 0      | 0.39   | 0.57    |
| 2-3.c11954/1/2403    | --                             | --        | --          | 1.17  | 6.12   | 0.42  | 1.44  | 0.17   | 0      | 0      | 0.68  | 0     | 0      | 0      | 0       |
| 2-3.c11958/6/2586    | low-density lipoprotein recep  | 156717580 | NP_00109633 | 0.53  | 4.46   | 2.67  | 0     | 0      | 1.27   | 0.69   | 0     | 0.11  | 0      | 0      | 0       |
| 2-3.c12055/5/2190    | collagen, type 1, alpha 2 prec | 147898763 | NP_00108072 | 30.08 | 269.22 | 94.54 | 38.67 | 55.43  | 827.66 | 0      | 0     | 0     | 0      | 0      | 4.66    |
| 2-3.c12206/1/2066    | PREDICTED: nuclear recepti     | 512881896 | XP_00294045 | 8.89  | 55.22  | 22.85 | 5.31  | 46.31  | 10.52  | 0      | 24.49 | 3.62  | 1.61   | 1.04   | 5.22    |
| 2-3.c12215/1/2021.-- | --                             | --        | --          | 29.21 | 11.47  | 13.94 | 19.97 | 47.42  | 6.96   | 81.74  | 62.8  | 53.54 | 268.3  | 133.18 | 433.03  |
| 2-3.c12436/4/2491    | RecName: Full=Voltage-depe     | 46576355  | O57483.1    | 0     | 0      | 0     | 0     | 0      | 1.07   | 0      | 4.02  | 6.36  | 4.69   | 1.75   | 0       |
| 2-3.c12507/1/2168    | --                             | --        | --          | 0     | 0      | 0     | 1.22  | 0      | 0      | 1.56   | 0.8   | 1.65  | 3.3    | 1.4    | 0       |
| 2-3.c12567/1/2031    | PREDICTED: CTP synthase        | 512819329 | XP_00293940 | 0.56  | 4.57   | 1.52  | 0     | 0.42   | 5.82   | 0      | 0     | 0     | 0      | 0      | 0       |
| 2-3.c12758/1/2311    | PREDICTED: interleukin enl     | 847169995 | XP_01280854 | 25.47 | 81.46  | 20.45 | 8.14  | 10.64  | 23.77  | 13.86  | 9.61  | 4.84  | 0      | 7.47   | 6.07    |
| 2-3.c12765/1/2745    | PREDICTED: semaphorin-3I       | 395539080 | XP_00377150 | 1.71  | 13.69  | 2.76  | 1.52  | 2.27   | 0.84   | 0      | 0.25  | 0     | 0      | 0.62   | 0       |
| 2-3.c12821/1/2495    | PREDICTED: hydroxysteroid      | 847099649 | XP_01281231 | 0.46  | 2.81   | 2.58  | 2.77  | 5.14   | 6      | 10.19  | 1.34  | 3.05  | 65.4   | 29.77  | 141.76  |
| 2-3.c13263/2/1862    | PREDICTED: stromal interac     | 686589298 | XP_00928915 | 6.41  | 8.42   | 0     | 6.52  | 14.97  | 13.16  | 3      | 15.51 | 15.19 | 50.02  | 88.71  | 68.46   |
| 2-3.c13360/1/1950    | septin 6 [Xenopus laevis]-gii  | 148230675 | NP_00108704 | 0.2   | 0      | 0     | 0     | 0      | 0.82   | 0      | 0.61  | 0     | 4.7    | 5.81   | 6.66    |
| 2-3.c13546/1/2174    | PREDICTED: 28S ribosomal       | 847132351 | XP_01281932 | 5.06  | 6.89   | 4.7   | 1.54  | 6.87   | 0      | 2.65   | 0     | 0     | 0      | 0      | 0.45    |
| 2-3.c13686/1/2392    | LOC733424 protein [Xenopus     | 80476880  | AAI08821.1  | 0     | 0      | 0     | 0     | 0      | 0.47   | 1.68   | 0.21  | 3.06  | 2.67   | 3.76   | 2.29    |
| 2-3.c13758/1/2368    | PREDICTED: immunoglobul        | 847130950 | XP_01281911 | 2.21  | 5.63   | 3.87  | 0.27  | 1.02   | 2.79   | 0      | 1.53  | 0.92  | 0.09   | 0      | 0       |
| 2-3.c13887/2/2221    | upf3b protein [Xenopus (Silu   | 165971526 | AAI58354.1  | 2.39  | 0      | 1.94  | 0.44  | 3.37   | 0.8    | 0      | 0     | 0     | 0      | 0      | 0       |
| 2-3.c14169/2/2285    | PREDICTED: junctophilin-2      | 301607262 | XP_00293323 | 0     | 0      | 0     | 2.74  | 0      | 2.55   | 6.73   | 0.57  | 9.42  | 0      | 6.95   | 0       |
| 2-3.c14596/3/2272    | PREDICTED: laminin subun       | 847130567 | XP_01281902 | 1.84  | 0      | 1.2   | 0.15  | 0.62   | 6.08   | 0      | 0     | 0     | 0      | 0      | 0       |
| 2-3.c14617/1/2506    | --                             | --        | --          | 2.29  | 16.36  | 3     | 0     | 1.54   | 8.87   | 0      | 2.79  | 1.73  | 1.34   | 0      | 0       |
| 2-3.c14945/1/2586    | PREDICTED: LOW QUALITY         | 831302925 | XP_01268353 | 1.11  | 1.99   | 2.47  | 0.94  | 0      | 0      | 0      | 0     | 0     | 0      | 0      | 0       |
| 2-3.c15293/2/2023    | phospholipid-transporting AT   | 71896237  | NP_00102556 | 0     | 0      | 0     | 0.46  | 0      | 0      | 0.67   | 0.55  | 0     | 1.9    | 0.91   | 3.81    |
| 2-3.c15345/1/2164    | regulator of G-protein signali | 291290887 | NP_00116747 | 0.05  | 0      | 0     | 1.02  | 0      | 0      | 3.22   | 0.22  | 0     | 10.54  | 16.55  | 0       |
| 2-3.c15590/1/1982    | alpha1 type II collagen [Cync  | 5360532   | BAA82043.1  | 2.37  | 42.67  | 10.69 | 5.98  | 0      | 9.68   | 2.62   | 7.47  | 1.36  | 1.17   | 0      | 0       |
| 2-3.c15840/1/2166.-- | --                             | --        | --          | 9.26  | 7.55   | 1.64  | 0     | 4.59   | 0      | 0      | 0.56  | 3.64  | 0      | 0      | 0       |
| 2-3.c15966/1/2331    | ubiquitin-like modifier-activa | 148225200 | NP_00108972 | 0     | 0      | 0     | 0.03  | 0      | 0      | 1.54   | 0     | 0     | 0      | 7.38   | 6.54    |
| 2-3.c16436/1/1810    | vacuolar proton-ATPase E-su    | 111924355 | BAF02791.1  | 3.76  | 3.42   | 6.38  | 0     | 9.56   | 1.33   | 0      | 3.47  | 0     | 0      | 0      | 0       |
| 2-3.c16565/1/2108    | --                             | --        | --          | 0     | 17.32  | 3.26  | 0     | 2.41   | 0      | 0      | 0     | 0     | 0      | 0      | 0       |
| 2-3.c16573/4/2106    | PREDICTED: 5-azacytidine-      | 512848342 | XP_00491543 | 2.27  | 7.1    | 4.91  | 2.26  | 5.4    | 0.11   | 0      | 0     | 5.55  | 0      | 0      | 0       |
| 2-3.c16756/3/2049    | syntaxin-binding protein 6 [X  | 54020954  | NP_00100571 | 1.04  | 7.25   | 1.82  | 0.57  | 0.23   | 0      | 0      | 0.53  | 1.99  | 0      | 0      | 0       |
| 2-3.c16848/2/2264    | PREDICTED: tetra tricopeptid   | 530607046 | XP_00529521 | 0     | 0      | 0     | 0.5   | 4.04   | 0.91   | 0      | 3.83  | 3.62  | 0.97   | 0      | 1.57    |
| 2-3.c16911/1/2137    | PREDICTED: band 4.1-like p     | 847168906 | XP_01280820 | 5.96  | 0      | 2.97  | 2.13  | 0.06   | 2.1    | 0      | 2.08  | 0     | 0      | 0      | 0       |
| 2-3.c16950/2/2118    | PREDICTED: large subunit C     | 301616900 | XP_00293788 | 4.28  | 6.94   | 2.4   | 0     | 0      | 0.07   | 3.22   | 0     | 2.28  | 0      | 0      | 1.45    |
| 2-3.c16955/1/1968    | PREDICTED: homeobox pro        | 847152600 | XP_01282325 | 2.44  | 2.27   | 2.81  | 0.91  | 0      | 0      | 0      | 0     | 0     | 1.79   | 0      | 0       |
| 2-3.c17248/1/2116    | PREDICTED: NADPH-depe          | 874459990 | XP_01295045 | 1.69  | 2.6    | 1.2   | 0.83  | 0      | 0.91   | 0.65   | 0     | 0.17  | 0      | 0      | 0       |
| 2-3.c17604/1/2593    | claudin-1 [Xenopus (Silurana   | 62751357  | NP_00101570 | 1.49  | 14.9   | 3.44  | 0     | 0      | 0      | 0      | 0     | 0     | 0      | 7.64   | 0       |
| 2-3.c17631/1/2468    | kinesin-like protein KIF2C [X  | 147904322 | NP_00108031 | 1.43  | 7.71   | 2.88  | 0.37  | 1.41   | 3.09   | 0.88   | 0.84  | 1.51  | 0      | 0.25   | 0.06    |
| 2-3.c17684/3/2163    | --                             | --        | --          | 7.19  | 12.69  | 0     | 1.68  | 0      | 0      | 0      | 0     | 0     | 0      | 0      | 9.97    |
| 2-3.c17879/6/2441    | PREDICTED: serine/threonin     | 512866570 | XP_00293996 | 2.5   | 11.05  | 3.83  | 1.56  | 1.93   | 18.67  | 3.08   | 0.56  | 1.56  | 0.41   | 0.2    | 0.25    |
| 2-3.c17883/2/2474    | --                             | --        | --          | 2.73  | 3.59   | 2.35  | 0     | 0      | 0      | 1.8    | 0     | 0     | 0      | 0      | 0       |

|                   |                                  |           |             |       |       |       |       |       |       |       |       |       |       |       |       |
|-------------------|----------------------------------|-----------|-------------|-------|-------|-------|-------|-------|-------|-------|-------|-------|-------|-------|-------|
| 2-3.c17958/4/2526 | hypothetical protein MGC75       | 38174052  | AAH61314.1  | 0.12  | 2.38  | 1.26  | 0     | 0.35  | 0.14  | 0.68  | 0     | 0.86  | 0     | 0     | 0     |
| 2-3.e17991/3/2208 | dual specificity mitogen-activ   | 56118586  | NP_00100805 | 0     | 0     | 0     | 20.58 | 0     | 0     | 14.62 | 14.99 | 20.55 | 11.53 | 3.69  | 6.26  |
| 2-3.e18641/3/2291 | PREDICTED: protein sel-1 h       | 301618001 | XP_00293841 | 0     | 0     | 0.16  | 0.79  | 0.67  | 0     | 0.9   | 0.17  | 1.93  | 8.33  | 1.93  | 5.59  |
| 2-3.e18673/4/2352 | PREDICTED: guanine nucleotidyl   | 395821567 | XP_00378410 | 0.97  | 6.42  | 1.43  | 0.21  | 2.01  | 0     | 0     | 0     | 0     | 0     | 0     | 0     |
| 2-3.e18991/1/1982 | PREDICTED: filamin-A-inte        | 301613504 | XP_00293624 | 8.54  | 5.38  | 3.46  | 1.15  | 2.16  | 7.85  | 0.75  | 5.97  | 1.59  | 0.56  | 0.58  | 0.28  |
| 2-3.e19040/1/2287 | (XCAP-C) [Xenopus laevis]        | 213626071 | AAI70550.1  | 0.92  | 5.71  | 1.32  | 0     | 0.45  | 1.6   | 0     | 0     | 0.94  | 0     | 0     | 0     |
| 2-3.e19080/1/2229 | PREDICTED: probable ubiquitin    | 558212499 | XP_00613401 | 4.71  | 11.9  | 1.55  | 0     | 1.77  | 0     | 0     | 0.91  | 0     | 0     | 0     | 0.6   |
| 2-3.e19571/1/2065 | --                               | --        | --          | 2.97  | 0.41  | 0     | 23.26 | 40.1  | 13.31 | 25.85 | 25.22 | 57.04 | 83.11 | 94.08 | 11.25 |
| 2-3.e19638/1/1991 | PREDICTED: calponin-1 [Tr        | 471381154 | XP_00437837 | 0     | 0     | 0     | 0     | 0     | 1.58  | 0     | 0     | 6.6   | 4.03  | 15.25 | 8.94  |
| 2-3.e19890/1/2237 | --                               | --        | --          | 1.48  | 2.34  | 1.84  | 0.64  | 0.26  | 0     | 0     | 0     | 0     | 1.16  | 0     | 0.64  |
| 2-3.e20127/2/2026 | PREDICTED: tetratricopeptide     | 620948097 | XP_00765381 | 0     | 0     | 0     | 0     | 0     | 1.7   | 0     | 0     | 3.18  | 2.56  | 1.39  | 2.17  |
| 2-3.e20238/3/2197 | :Unknown (protein for MGC:1      | 120538440 | AAI29682.1  | 0     | 3     | 0     | 1.21  | 2.97  | 0.45  | 0     | 8.46  | 0     | 21.47 | 34.46 | 33.82 |
| 2-3.e20444/1/2184 | probable lysosomal cobalamin     | 118403984 | NP_00107218 | 0     | 0     | 0     | 0     | 2.53  | 0.75  | 0     | 1.14  | 0     | 4.39  | 4.04  | 0     |
| 2-3.e20888/1/2302 | :Complement factor B [Xenopus    | 213626825 | AAI70192.1  | 0     | 0     | 0.12  | 0     | 12.21 | 11.89 | 0.05  | 0.1   | 5.89  | 35.42 | 45.16 | 5.59  |
| 2-3.e20942/1/2065 | uncharacterized protein LOC      | 58332520  | NP_00101133 | 2.77  | 5.34  | 1.48  | 0     | 0     | 1.33  | 0.44  | 0.77  | 0     | 0     | 0     | 0     |
| 2-3.e20966/1/2286 | --                               | --        | --          | 0     | 0     | 0     | 0     | 0.37  | 0.53  | 7.23  | 0     | 0.97  | 17.42 | 34.63 | 5.35  |
| 2-3.e21088/1/2549 | periostin precursor [Xenopus     | 163915007 | NP_00110637 | 1.7   | 41.01 | 7.44  | 0     | 3.34  | 75.99 | 1.79  | 0.73  | 9.14  | 0.08  | 0     | 0     |
| 2-3.e21133/1/2588 | PREDICTED: synaptotagmin-1       | 301612611 | XP_00293581 | 2.28  | 13.7  | 2.42  | 1.72  | 1.29  | 15.98 | 0.11  | 1.2   | 0.14  | 0     | 0     | 0.11  |
| 2-3.e21471/1/2157 | --                               | --        | --          | 1.13  | 1.2   | 2.53  | 0     | 0.21  | 0     | 0     | 1.98  | 0     | 0     | 0     | 0     |
| 2-3.e21589/1/1874 | --                               | --        | --          | 1.37  | 0     | 0     | 1.66  | 1.87  | 0.17  | 3.29  | 1.45  | 0.75  | 9.9   | 12.01 | 16.41 |
| 2-3.e21687/1/2129 | protein unc-45 homolog B [X      | 297591951 | NP_00117205 | 3.71  | 25.53 | 4.43  | 4.6   | 3.21  | 57.85 | 1.22  | 1.34  | 2.8   | 1.31  | 0.39  | 0.19  |
| 2-3.e21772/8/1947 | TATA box-binding protein-a       | 148225402 | NP_00107945 | 2.27  | 0     | 1.73  | 0.66  | 0     | 1.26  | 0.35  | 0     | 1.04  | 0     | 0     | 0     |
| 2-3.e21804/1/2220 | PREDICTED: zinc finger protein   | 602653218 | XP_00744530 | 0.12  | 0     | 0     | 0.43  | 0.46  | 0     | 1.24  | 0     | 0.63  | 4.09  | 7.27  | 2.35  |
| 2-3.e21859/1/2039 | staphylococcal nuclease and      | 148234849 | NP_00107960 | 3.46  | 18.41 | 2.81  | 0     | 5.57  | 10.82 | 1.28  | 6.04  | 1.06  | 0     | 0     | 1.57  |
| 2-3.e21882/2/2312 | uncharacterized protein LOC      | 148226767 | NP_00108484 | 0     | 0     | 0     | 15.57 | 0     | 2.19  | 28.82 | 16.71 | 30.15 | 49.34 | 45.12 | 59.19 |
| 2-3.e22004/9/1913 | LOC431836 protein, partial [     | 62739321  | AAH94088.1  | 26.67 | 23.19 | 16.23 | 22.3  | 0.7   | 0.26  | 0.91  | 19.52 | 0.43  | 0.38  | 0.42  | 0.47  |
| 2-3.e22347/2/2177 | CDK5 regulatory subunit asso     | 148235437 | NP_00109045 | 0     | 0.81  | 0     | 4.14  | 0.15  | 0.57  | 2.99  | 2.25  | 0     | 9.9   | 7.08  | 6.88  |
| 2-3.e22370/2/2244 | PREDICTED: semaphorin-3I         | 395539080 | XP_00377150 | 2.44  | 13.1  | 3.99  | 0     | 2.8   | 2.66  | 1.15  | 1.55  | 4.08  | 0.01  | 0.61  | 0.44  |
| 2-3.e22509/1/2050 | PREDICTED: microtubule-asso      | 847168426 | XP_01280801 | 4.98  | 3.24  | 1.86  | 0     | 3.09  | 2.1   | 1.13  | 3.21  | 0.54  | 0     | 0     | 0.13  |
| 2-3.e23100/1/2426 | PREDICTED: hydroxysteroid        | 847099649 | XP_01281231 | 0.7   | 0.14  | 0.76  | 1.09  | 0.77  | 1.99  | 2.24  | 0.48  | 1.21  | 10.27 | 11.98 | 22.32 |
| 2-3.e23427/2/2340 | eukaryotic translation initiati  | 156717262 | NP_00109617 | 0.01  | 0     | 0     | 5.1   | 3.17  | 3.92  | 0.84  | 1.84  | 1.77  | 2.43  | 0     | 0.83  |
| 2-3.e23976/1/2487 | fragile X mental retardation s   | 147899444 | NP_00108178 | 0.49  | 0     | 0     | 13.07 | 11.91 | 35.48 | 0.29  | 18.81 | 0     | 11.68 | 7.97  | 0     |
| 2-3.e23997/2/2654 | --                               | --        | --          | 3.24  | 7.31  | 5.3   | 0.06  | 6.32  | 25.55 | 0.37  | 0.36  | 4.52  | 0.2   | 0     | 0.98  |
| 2-3.e24083/1/2474 | :serine/arginine-rich splicing f | 55926178  | NP_00100748 | 0.79  | 18.63 | 5.24  | 0.84  | 2.58  | 4.87  | 0     | 1.41  | 2.27  | 0     | 0     | 0.27  |
| 2-3.e24098/1/2296 | PREDICTED: H(+)/Cl(-) exc        | 847163797 | XP_01282596 | 0.52  | 0     | 0.13  | 0.57  | 0.06  | 0.93  | 1.45  | 0     | 1.19  | 7.17  | 5.81  | 6.7   |
| 2-3.e24401/3/2334 | PREDICTED: transcription e       | 847101864 | XP_01281290 | 8.9   | 0     | 4.84  | 1.64  | 0     | 0.22  | 0     | 0     | 0     | 0     | 3.5   | 0     |
| 2-3.e24516/2/2345 | PREDICTED: collagen alpha        | 847169802 | XP_01280845 | 0.41  | 4.91  | 1.65  | 0.84  | 0.04  | 2.36  | 0     | 0     | 0     | 0.66  | 0.03  | 0     |
| 2-3.e24541/3/2527 | thrombospondin-4 precursor       | 118404528 | NP_00107267 | 5.73  | 11.35 | 9.86  | 0     | 2.48  | 5.02  | 0     | 2.63  | 3.13  | 1.1   | 0.55  | 0     |
| 2-3.e25331/5/2067 | --                               | --        | --          | 0.77  | 0.8   | 0.65  | 2.74  | 1.93  | 2.4   | 6.25  | 1.92  | 2.39  | 16.76 | 18.87 | 9.31  |
| 2-3.e25387/2/1940 | --                               | --        | --          | 1.02  | 16.12 | 4.39  | 0     | 0.02  | 1.43  | 0     | 2.02  | 0     | 0     | 0     | 0     |
| 2-3.e25434/3/2326 | PREDICTED: LOW QUALITY           | 512830904 | XP_00293188 | 8.79  | 5.36  | 3.96  | 0.64  | 0     | 1.79  | 0     | 0.87  | 0.18  | 0     | 1.58  | 0     |
| 2-3.e25875/2/2644 | --                               | --        | --          | 0     | 0     | 0.33  | 0.76  | 0     | 0     | 3.73  | 1.15  | 2.14  | 4.13  | 4.43  | 5.97  |
| 2-3.e26473/1/2141 | --                               | --        | --          | 0.24  | 0.84  | 0.25  | 6     | 5.68  | 1.71  | 0     | 4.13  | 7.76  | 20.33 | 3.03  | 20.95 |
| 2-3.e26771/1/2264 | PREDICTED: collagen alpha        | 556973054 | XP_00599461 | 1.66  | 31.16 | 9.43  | 0.49  | 2.2   | 4.97  | 2     | 1.73  | 4.21  | 0.26  | 0     | 0.07  |
| 2-3.e26883/1/2274 | PREDICTED: dipeptidyl pep        | 847108105 | XP_01281387 | 0     | 0     | 0     | 1.92  | 2.57  | 0.46  | 3.35  | 1.62  | 2.32  | 3.16  | 0.71  | 0.88  |
| 2-3.e27062/2/2124 | Plaa protein [Xenopus laevis]    | 68534804  | AAH98975.1  | 0     | 1.35  | 0     | 1.83  | 0     | 0     | 9.53  | 0     | 0     | 2.51  | 12.57 | 10.97 |
| 2-3.e27096/1/2572 | --                               | --        | --          | 0     | 2.75  | 0.63  | 3.59  | 3.89  | 3.75  | 1.83  | 0.12  | 6.65  | 22.86 | 73.93 | 38.84 |
| 2-3.e27113/1/2210 | --                               | --        | --          | 0.03  | 0     | 0     | 5.61  | 0     | 0     | 68.55 | 0     | 5.68  | 16.15 | 5.68  | 13.04 |
| 2-3.e27248/1/2300 | heterogeneous nuclear ribonu     | 218749891 | NP_00108247 | 3.99  | 3.86  | 0.04  | 0     | 0     | 0     | 0     | 0.53  | 0     | 0     | 0     | 0     |
| 2-3.e27621/1/2398 | uncharacterized protein LOC      | 148233247 | NP_00108367 | 1.37  | 2.74  | 1.35  | 0.14  | 0     | 0.32  | 1.3   | 0     | 0     | 0     | 0     | 0     |
| 2-3.e28099/2/2252 | pyruvate carboxylase, gene 1     | 148227386 | NP_00108322 | 0.08  | 2.16  | 0.47  | 1.99  | 2.78  | 7.53  | 8     | 0.66  | 0.81  | 7.88  | 31.77 | 45.36 |
| 2-3.e28424/1/2004 | PREDICTED: tight junction        | 512813087 | XP_00491083 | 0.1   | 0     | 0     | 1.66  | 0     | 0     | 0.13  | 1.29  | 1.58  | 4.31  | 1.77  | 5.66  |
| 2-3.e28445/4/1875 | chaperonin containing TCP1,      | 89273814  | CAJ81480.1  | 18.93 | 15.31 | 8.79  | 0     | 6.87  | 5.66  | 4.8   | 2.46  | 1.82  | 0     | 0     | 3.91  |
| 2-3.e28586/1/2642 | MGC64589 protein, partial [2     | 27735407  | AAH41516.1  | 2.37  | 0.82  | 0.84  | 0.31  | 0.22  | 0.18  | 0.49  | 0.33  | 0.84  | 0     | 0     | 0     |
| 2-3.e28812/3/2259 | angiopoietin-related protein 7   | 156717416 | NP_00109624 | 3.03  | 22.21 | 6.66  | 2.03  | 0.68  | 16.35 | 1.29  | 2.14  | 0.59  | 0.1   | 0.12  | 0.91  |
| 2-3.e29286/1/2231 | PREDICTED: myomegalin-li         | 591373231 | XP_00706131 | 0.07  | 0     | 0.07  | 15.07 | 0     | 0     | 23.41 | 0     | 26.24 | 0     | 0     | 2.31  |
| 2-3.e29329/1/2325 | --                               | --        | --          | 0.98  | 0.72  | 0     | 0.57  | 0.65  | 2.53  | 2.88  | 0     | 1.06  | 17.23 | 15.36 | 6     |
| 2-3.e29517/3/2121 | PREDICTED: ubiquitin carbox      | 301614077 | XP_00293651 | 0     | 0     | 0     | 1.76  | 0.91  | 0     | 4.69  | 6.56  | 0.83  | 0     | 0     | 9.83  |

|                   |                                |           |             |        |         |        |        |        |       |       |       |        |        |        |        |
|-------------------|--------------------------------|-----------|-------------|--------|---------|--------|--------|--------|-------|-------|-------|--------|--------|--------|--------|
| 2-3.c29549/1/2470 | PREDICTED: LOW QUALI           | 512830904 | XP_00293188 | 21.92  | 27.21   | 13.77  | 7.73   | 6.37   | 50.95 | 5.33  | 0     | 7.53   | 2.09   | 0      | 2.86   |
| 2-3.c29611/1/6284 | --                             | --        | --          | 0      | 5.83    | 3.24   | 177.42 | 123.98 | 64.73 | 74.11 | 4.89  | 168.11 | 103.15 | 442.25 | 94.04  |
| 2-3.c29815/1/2642 | PREDICTED: G-protein cou       | 512882444 | XP_00491996 | 0.61   | 1.96    | 0.57   | 0.67   | 13.17  | 6.32  | 7.43  | 23.8  | 20.2   | 12.01  | 13.4   | 0.59   |
| 2-3.c29976/2/2445 | Histone H3.3 [Harpegna         | 307204446 | EFN83153.1  | 0      | 0       | 0      | 1.65   | 3.09   | 2.12  | 0     | 6.15  | 3.71   | 10.26  | 7.3    | 3.19   |
| 2-3.c30252/1/2102 | --                             | --        | --          | 0      | 0.03    | 0      | 2.87   | 0      | 0     | 2.01  | 2.1   | 1.38   | 3.38   | 1.72   | 0      |
| 2-3.c30719/1/2233 | transcription factor Dp-1 [Xe  | 148222844 | NP_00108805 | 0.67   | 4.84    | 0.91   | 0.99   | 0.4    | 0.65  | 0.39  | 0     | 0      | 0      | 0      | 0      |
| 2-3.c31514/4/2364 | PREDICTED: collagen alpha      | 847130150 | XP_01281895 | 1.44   | 39.44   | 14.64  | 8.87   | 0      | 0     | 5.59  | 0     | 4.95   | 0      | 0      | 1.32   |
| 2-3.c31715/2/2199 | guanine nucleotide binding p   | 148231283 | NP_00108051 | 44.7   | 103.16  | 4.65   | 0      | 2.61   | 0     | 13.88 | 0.01  | 0      | 0      | 0      | 2.19   |
| 2-3.c31982/1/2222 | Na-K-2Cl cotransporter 1 [Xe   | 147904042 | NP_00109133 | 0      | 0       | 0.08   | 0.35   | 0.75   | 0     | 1.32  | 0     | 0.9    | 3.96   | 2.61   | 10.47  |
| 2-3.c32079/1/2215 | PREDICTED: myomegalin-li       | 573893936 | XP_00663471 | 0      | 0       | 0      | 1.38   | 0.17   | 0.33  | 3.17  | 0.36  | 1.78   | 0      | 0      | 0.68   |
| 2-3.c33669/1/4992 | uncharacterized protein C17o   | 52345942  | NP_00100501 | 0      | 0       | 0      | 0.68   | 0      | 0     | 0.88  | 0     | 1.87   | 2.1    | 3.79   | 3.3    |
| 2-3.c33715/1/2171 | --                             | --        | --          | 0.34   | 0.72    | 0      | 0      | 0.64   | 1.54  | 0.98  | 0.31  | 0.62   | 8.22   | 4.51   | 10.06  |
| 2-3.c33875/1/1894 | --                             | --        | --          | 0      | 0       | 0      | 0      | 0.38   | 2.61  | 3.16  | 0     | 0      | 5.66   | 8.91   | 0      |
| 2-3.c34018/2/1900 | --                             | --        | --          | 0      | 0       | 0      | 4.4    | 1.84   | 0     | 4.9   | 2.37  | 4.15   | 0.64   | 2.38   | 1.84   |
| 2-3.c34088/1/2108 | PREDICTED: myotubularin-       | 847116167 | XP_01281582 | 0.83   | 4.04    | 1.02   | 1.01   | 0      | 0.75  | 0.06  | 0     | 1.11   | 0      | 0      | 0      |
| 2-3.c34802/1/2277 | --                             | --        | --          | 0      | 29.35   | 10.01  | 0.9    | 6.25   | 3.54  | 0     | 3.68  | 12.46  | 0      | 0      | 0      |
| 2-3.c35295/1/2173 | --                             | --        | --          | 0      | 0       | 0      | 2.19   | 2.06   | 3.75  | 1.59  | 1.12  | 3.12   | 3.26   | 9.13   | 16.43  |
| 2-3.c35318/1/2144 | --                             | --        | --          | 0      | 0       | 0      | 0      | 0.91   | 2.98  | 0     | 1.81  | 0      | 12.46  | 13.97  | 24.99  |
| 2-3.c35542/1/2172 | --                             | --        | --          | 0.06   | 0       | 0      | 0.06   | 3.56   | 2.78  | 2.06  | 2.4   | 1.64   | 0      | 1.28   | 0      |
| 2-3.c35788/1/2229 | netrin 1 precursor [Xenopus    | 118404128 | NP_00107238 | 0.71   | 3.19    | 0.86   | 0.25   | 0      | 1.42  | 0.15  | 1     | 0      | 0      | 0      | 0      |
| 2-3.c35913/1/2033 | --                             | --        | --          | 0      | 0       | 0      | 0      | 4.61   | 4.13  | 0     | 4.63  | 0      | 14.79  | 0      | 17.63  |
| 2-3.c36813/3/2290 | Activated RNA polymerase I     | 226372244 | ACO51747.1  | 0      | 0       | 0      | 0      | 0.51   | 0     | 2.73  | 0     | 0      | 6.09   | 3.34   | 1.53   |
| 2-3.c37126/1/2373 | PREDICTED: RNA polymer         | 301607791 | XP_00293347 | 3.14   | 2.88    | 0.2    | 0      | 3.47   | 0     | 0     | 0     | 0      | 0      | 0      | 0      |
| 2-3.c37162/1/2260 | segment polarity protein dish  | 147902637 | NP_00108605 | 7.46   | 6.01    | 4.78   | 0.92   | 2.33   | 0     | 3.11  | 0     | 0.99   | 0      | 0      | 1.03   |
| 2-3.c38674/2/2550 | uncharacterized protein LOC    | 148223037 | NP_00108484 | 0      | 0       | 0      | 0.96   | 0      | 0     | 4.87  | 4.61  | 0      | 0      | 3.58   | 0      |
| 2-3.c39182/2/2306 | collagen alpha-1(III) chain pr | 218847780 | NP_00113637 | 0      | 100.53  | 16.19  | 0      | 0      | 0     | 0     | 0     | 0      | 0      | 0      | 0      |
| 2-3.c39770/1/1895 | ataxin-10 [Xenopus (Silurana   | 62751857  | NP_00101582 | 5.31   | 8.24    | 1.42   | 0.27   | 1.66   | 2.62  | 0.25  | 0.92  | 0.83   | 0      | 0.19   | 0      |
| 2-3.c39827/1/2344 | PREDICTED: transcription e     | 512819310 | XP_00491166 | 0.47   | 8.14    | 1.79   | 0      | 0.3    | 6.09  | 0.51  | 0.53  | 0.73   | 0      | 0.26   | 0      |
| 2-3.c40334/1/2160 | ethanolamine-phosphate phos    | 147905107 | NP_00108663 | 0      | 0       | 0.68   | 3.42   | 13.33  | 2.75  | 22.64 | 5.61  | 1.88   | 15.37  | 36.26  | 60.49  |
| 2-3.c40397/1/2078 | PREDICTED: spectrin beta c     | 542194400 | XP_00547213 | 0      | 0.12    | 0      | 1.82   | 0      | 0     | 3.48  | 1.78  | 0      | 1.6    | 2.88   | 7.14   |
| 2-3.c40415/1/1972 | phosphatidylinositol 4-kinase  | 148228714 | NP_00108705 | 0.73   | 3.26    | 1.12   | 0.2    | 4.19   | 0.96  | 0     | 1.28  | 0.37   | 0      | 0      | 0      |
| 2-3.c40679/1/2407 | dual specificity mitogen-activ | 56118586  | NP_00100805 | 0      | 0       | 0      | 2.44   | 0      | 0.22  | 3.47  | 2.96  | 3.42   | 4.64   | 1.52   | 0      |
| 2-3.c40682/1/2371 | PREDICTED: far upstream e      | 847117382 | XP_01281622 | 1.59   | 2.03    | 0.89   | 0.23   | 1.44   | 0.06  | 0     | 0     | 0.35   | 0      | 0      | 0      |
| 2-3.c40754/1/2314 | YTH domain family protein 1    | 431894607 | ELK04407.1  | 3.89   | 4.67    | 0      | 2.44   | 1.2    | 0     | 0     | 0     | 0      | 0      | 0      | 0      |
| 2-3.c40857/1/1998 | PREDICTED: endogenous re       | 831566752 | XP_01273347 | 0      | 4.2     | 1.17   | 2.14   | 1.11   | 0     | 7.21  | 0     | 1.31   | 0      | 0      | 0      |
| 2-3.c41000/1/2484 | --                             | --        | --          | 0      | 0.26    | 0      | 3.87   | 0.34   | 0     | 2.83  | 2.71  | 2.68   | 2.95   | 1.4    | 0      |
| 2-3.c41305/1/2020 | zinc finger protein 703-B [Xe  | 148223708 | NP_00108444 | 6.74   | 1.17    | 10.91  | 0      | 3.94   | 0     | 0     | 0     | 0      | 0      | 0      | 0      |
| 2-3.c41514/1/2631 | PREDICTED: telethonin [Xe      | 301622194 | XP_00294041 | 57.9   | 18.4    | 61.92  | 0      | 37.97  | 64.19 | 4.2   | 9.7   | 3.27   | 1.56   | 4.38   | 0.43   |
| 2-3.c41584/1/2318 | PREDICTED: mixed lineage       | 301604167 | XP_00293171 | 5.26   | 10.67   | 7.55   | 1.38   | 8.03   | 1.79  | 0     | 6.37  | 2.11   | 0      | 0      | 0      |
| 2-3.c41735/1/1948 | --                             | --        | --          | 2.85   | 12.72   | 0.42   | 0.04   | 0.89   | 2.41  | 0.35  | 2.93  | 0.02   | 0.13   | 0      | 0      |
| 2-3.c42007/1/2299 | --                             | --        | --          | 0.94   | 14.61   | 5.84   | 0      | 2.11   | 64.62 | 1.35  | 0     | 0.82   | 0      | 1.25   | 0      |
| 2-3.c42029/1/2500 | PREDICTED: protein O-man       | 512860787 | XP_0029389C | 0      | 0       | 0      | 0.28   | 0      | 0     | 0.42  | 2.18  | 1.11   | 0      | 0      | 3.43   |
| 2-3.c42063/1/2352 | PREDICTED: elongation fac      | 557323742 | XP_00603492 | 390.76 | 1326.95 | 439.07 | 331.79 | 236.61 | 0     | 55.45 | 68.6  | 297.6  | 0      | 0      | 209.67 |
| 2-3.c42404/1/2038 | PREDICTED: serine/threonir     | 734601995 | XP_01072793 | 1.07   | 9.14    | 1.67   | 0      | 0      | 0     | 0     | 0     | 2.29   | 0      | 0      | 2.77   |
| 2-3.c42423/1/2242 | heterogeneous nuclear ribonu   | 89272515  | CAJ81560.1  | 0      | 30.91   | 3.72   | 0      | 1.59   | 4.14  | 0.78  | 0.79  | 0      | 0      | 0      | 0      |
| 2-3.c42568/1/2167 | PREDICTED: leucine-rich re     | 847138470 | XP_01282083 | 0.86   | 2.61    | 1.59   | 0.56   | 1.87   | 0.24  | 2     | 0     | 0.12   | 0      | 0      | 0      |
| 2-3.c43109/1/2341 | PREDICTED: AP-2 complex        | 821005491 | XP_01236595 | 0      | 0       | 0      | 1.6    | 0      | 5.51  | 2.75  | 1.17  | 5.92   | 37.02  | 39.41  | 7.03   |
| 2-3.c43548/1/2227 | WD repeat and SOCS box co      | 148222751 | NP_00109025 | 0      | 0       | 0      | 0      | 2.48   | 0.69  | 1.24  | 0     | 2.82   | 8.89   | 7.18   | 4.92   |
| 2-3.c43664/1/1854 | PREDICTED: methionine an       | 704821225 | XP_0101567C | 4.08   | 13.61   | 7.84   | 1.83   | 2.92   | 9.15  | 1.96  | 0     | 0.96   | 0      | 0      | 0.75   |
| 2-3.c43699/1/2329 | --                             | --        | --          | 0      | 5.02    | 1.53   | 0      | 1.16   | 0     | 0     | 0     | 0      | 0      | 0      | 0      |
| 2-3.c43769/2/1884 | fragile X mental retardation s | 147899444 | NP_00108178 | 0.47   | 0.39    | 0.25   | 15.4   | 21.62  | 61.82 | 0.67  | 16.06 | 12.15  | 13.83  | 14.23  | 0      |
| 2-3.c43935/1/2533 | --                             | --        | --          | 2.28   | 10.67   | 4.34   | 0      | 5.87   | 10.44 | 0     | 0     | 0.08   | 0      | 3.56   | 2.65   |
| 2-3.c45337/2/2129 | PREDICTED: receptor-type t     | 704177475 | XP_01013411 | 0.96   | 0       | 0      | 2.25   | 0      | 4.56  | 1.18  | 3.14  | 0.93   | 12.37  | 9.06   | 13.18  |
| 2-3.c46191/1/2155 | --                             | --        | --          | 0      | 0       | 0      | 0      | 6.82   | 0     | 0     | 5.91  | 0      | 111.42 | 0      | 55.32  |
| 2-3.c46636/1/2250 | --                             | --        | --          | 0.17   | 7.04    | 2.69   | 0.44   | 0      | 0.88  | 0.46  | 0.78  | 0.69   | 0.09   | 0      | 0.07   |
| 2-3.c46871/1/2764 | Glycogen phosphorylase, mu     | 465954282 | EMP25833.1  | 0      | 0.76    | 0      | 4.41   | 8.51   | 1.34  | 46.16 | 4.16  | 44     | 17.39  | 0.07   | 13.83  |
| 2-3.c47242/1/2412 | PREDICTED: zinc finger pro     | 558191053 | XP_00612944 | 2.84   | 5.26    | 0      | 1.94   | 0.67   | 0     | 0     | 0.53  | 1.27   | 0      | 0      | 0      |
| 2-3.c47351/1/2315 | PREDICTED: rab GDP disso       | 573874500 | XP_00662563 | 0      | 7.61    | 1.85   | 0      | 1.21   | 0     | 0     | 0     | 0.5    | 0      | 0      | 0      |

|                    |                                 |           |             |       |       |       |       |       |       |       |       |       |       |       |       |
|--------------------|---------------------------------|-----------|-------------|-------|-------|-------|-------|-------|-------|-------|-------|-------|-------|-------|-------|
| 2-3.c47496/1/2533  | PREDICTED: zinc finger pro      | 591357490 | XP_00705381 | 0.89  | 2.05  | 0.64  | 0     | 0     | 0.61  | 0     | 0.09  | 0.06  | 0     | 0     | 0     |
| 2-3.c47765/1/2613  | probable ATP-dependent RN       | 118405026 | NP_00107251 | 0     | 0     | 0     | 0.79  | 0     | 0     | 0.17  | 0     | 0.9   | 5.32  | 5.71  | 4.8   |
| 2-3.c47898/1/2398  | polypyrimidine tract-binding    | 118404352 | NP_00107247 | 2.7   | 7.01  | 0     | 1.87  | 2.75  | 0     | 0     | 1.22  | 0     | 0     | 0.1   | 0     |
| 2-3.c47969/1/2158  | leucine-rich repeat-containing  | 45361617  | NP_989386.1 | 0.65  | 0     | 0     | 1.36  | 0     | 1.09  | 2.12  | 0     | 0.14  | 7.36  | 8.18  | 9.03  |
| 2-3.c48264/1/2191  | PREDICTED: fructose-bisph       | 591365782 | XP_00705775 | 0     | 0     | 0     | 0.61  | 0.35  | 0     | 0.36  | 0.88  | 0.59  | 4.36  | 8.27  | 0     |
| 2-3.c48716/1/2707  | --                              | --        | --          | 0     | 0     | 0     | 0.24  | 1.95  | 0     | 2.78  | 0.44  | 3.43  | 9.74  | 12.49 | 6.69  |
| 2-3.c48879/1/2436  | --                              | --        | --          | 0.91  | 0     | 1.08  | 3.91  | 5.97  | 0     | 15.54 | 4.79  | 4.51  | 13.6  | 8.07  | 27.98 |
| 2-3.c49000/1/2204  | PREDICTED: ras-specific gu      | 363740538 | XP_00364234 | 0.61  | 0.25  | 0.63  | 1.41  | 2.2   | 3.07  | 4.22  | 2.73  | 2.23  | 11.3  | 17.29 | 15.71 |
| 2-3.c49383/1/2447  | PREDICTED: probable ubiq        | 558212509 | XP_00613401 | 0.21  | 3.16  | 0     | 5.2   | 0     | 5.15  | 10.29 | 1.26  | 4.17  | 20.86 | 20.89 | 19.44 |
| 2-3.c50403/1/2339  | PREDICTED: huntingtin-inte      | 512820820 | XP_00293355 | 6.61  | 23.85 | 8.07  | 1.19  | 3.87  | 3.68  | 2.81  | 1.95  | 5.13  | 1.79  | 1.2   | 0.44  |
| 2-3.c50765/5/2056  | alpha1 type II collagen [Cync   | 5360532   | BAA82043.1  | 8.78  | 21.95 | 33.74 | 6.15  | 0     | 0.04  | 0     | 0.01  | 1.82  | 0     | 0     | 0     |
| 2-3.c52175/1/2513  | MGC79035 protein [Xenopus       | 147901187 | NP_00108691 | 2.45  | 12.66 | 3.88  | 2.35  | 0.26  | 10.46 | 1.66  | 2.78  | 2.24  | 0.01  | 0     | 1.33  |
| 2-3.c52610/1/2742  | PREDICTED: uncharacterize       | 847164282 | XP_01282605 | 0     | 2.41  | 0.92  | 0     | 1.3   | 0.82  | 0     | 0.06  | 0     | 0     | 0     | 0     |
| 2-3.c53295/1/2070  | PREDICTED: eukaryotic trar      | 558148079 | XP_00612003 | 2.29  | 4.53  | 3     | 1.14  | 0     | 1.08  | 0.91  | 0     | 0     | 0     | 0     | 0     |
| 2-3.c53583/1/2006  | solute carrier family 40 (iron- | 147904330 | NP_00109074 | 0     | 6.52  | 5.16  | 3.27  | 0.45  | 0     | 0     | 0     | 0     | 0     | 0     | 0     |
| 2-3.c53966/2/1914  | Unknown (protein for MGC:3      | 49257408  | AAH73381.1  | 0     | 0     | 0     | 5.35  | 0     | 0     | 10.08 | 0     | 0     | 4.82  | 18.12 | 10.77 |
| 2-3.c54192/1/2006  | PREDICTED: tetratricopepti      | 530607046 | XP_00529521 | 5.51  | 6.43  | 8.13  | 0     | 5     | 2.51  | 3.52  | 3.5   | 1.51  | 0     | 0     | 1.65  |
| 2-3.c54663/1/1999  | death effector domain contair   | 148234641 | NP_00108871 | 0     | 0     | 1.3   | 1.63  | 0.03  | 5.4   | 6.98  | 1.35  | 1.52  | 23.99 | 32.1  | 9.03  |
| 2-3.c54730/1/2370  | PREDICTED: transcription e      | 512819310 | XP_00491166 | 0.81  | 4.41  | 0.19  | 0     | 0     | 4.12  | 0.18  | 0     | 0     | 0     | 0     | 0     |
| 2-3.c54819/1/2637  | --                              | --        | --          | 0     | 0     | 0     | 2.68  | 0     | 0     | 0.87  | 1.03  | 3.01  | 1.25  | 0.76  | 0     |
| 2-3.c55405/1/2100  | PREDICTED: mucin-4-like i       | 847172450 | XP_01280947 | 31.02 | 9.82  | 29.93 | 12.92 | 8.66  | 0.06  | 5.8   | 9.84  | 20.62 | 0     | 0     | 3.1   |
| 2-3.c55701/1/2518  | PREDICTED: AT-hook DNA          | 847107809 | XP_01281378 | 0.25  | 14.11 | 4.27  | 0     | 0     | 0     | 7.61  | 0     | 0     | 0.55  | 16.77 | 0     |
| 2-3.c56059/1/1916  | --                              | --        | --          | 0     | 0     | 0     | 0     | 55.41 | 20.46 | 53.81 | 0.27  | 71.08 | 19.1  | 14.2  | 16.65 |
| 2-3.c56406/1/2361  | PREDICTED: moesin isoforr       | 301614728 | XP_00293682 | 0     | 40.85 | 7.53  | 0     | 6.37  | 0     | 0     | 0     | 2.57  | 0     | 0     | 0     |
| 2-3.c56698/1/2650  | PREDICTED: collagen alpha       | 512867119 | XP_00293154 | 1.63  | 5.22  | 0     | 0     | 2.27  | 33.29 | 0     | 0     | 0     | 0     | 0     | 0     |
| 2-3.c57787/6/2491  | serine incorporator 1 precurs   | 58332654  | NP_00101135 | 9.16  | 2.18  | 5.47  | 0     | 0     | 1.9   | 2.09  | 0     | 0     | 0     | 0     | 0     |
| 2-3.c58668/8/2320  | PREDICTED: dihydropyrimi        | 301603867 | XP_00293158 | 0.69  | 16.93 | 1.88  | 0     | 0.43  | 22.04 | 0.54  | 0     | 0.56  | 0     | 0     | 0     |
| 2-3.c58683/2/2016  | PREDICTED: serine/threonin      | 817327488 | XP_01229070 | 0     | 0     | 0     | 4.08  | 0     | 1.62  | 8.81  | 1.89  | 2.14  | 20.99 | 13.96 | 11.91 |
| 2-3.c58886/1/2150  | phosphatidylinositol glycan a   | 148237151 | NP_00108743 | 0     | 0     | 0     | 0     | 0.3   | 0     | 0.67  | 0     | 0     | 2.35  | 5.06  | 2.05  |
| 2-3.c59882/1/2489  | PREDICTED: dual specificit      | 847142251 | XP_01282152 | 1.64  | 0     | 1.35  | 0     | 0     | 0     | 0.47  | 0     | 1.07  | 0     | 0     | 0     |
| 2-3.c60913/1/2359  | F-box/LRR-repeat protein 5 [    | 147901440 | NP_00108506 | 0     | 0     | 0     | 0     | 0     | 3.01  | 1.23  | 0     | 0     | 0     | 3.11  | 2.58  |
| 2-3.c61128/1/2336  | gsn protein [Xenopus (Silur     | 159155320 | AAI54876.1  | 0     | 0     | 0     | 0.09  | 23.13 | 17.12 | 10.27 | 0     | 6.94  | 37.01 | 39.97 | 31.44 |
| 2-3.c61138/1/2177  | --                              | --        | --          | 0.07  | 0     | 0.06  | 9.8   | 0     | 0     | 8.16  | 10.62 | 9.92  | 8.37  | 9.54  | 0.05  |
| 2-3.c62149/4/2004  | zinc finger protein 207 [Xeno   | 89269088  | CAJ81941.1  | 1.37  | 12.77 | 4.68  | 0     | 0     | 0     | 1.8   | 2.69  | 0     | 0     | 0     | 13.3  |
| 2-3.c62633/2/2459  | --                              | --        | --          | 0     | 0     | 0     | 0     | 0     | 14.75 | 12.88 | 0     | 8.31  | 11.4  | 0     | 0     |
| 2-3.c63021/2/1844  | myosin-9 [Xenopus laevis]-g     | 148225656 | NP_00108184 | 0     | 0     | 0     | 2.87  | 0     | 0     | 16.02 | 0     | 1.62  | 1.28  | 30.88 | 11.05 |
| 2-3.c63212/1/2174  | gelsoin [Xenopus laevis]-gii    | 148223299 | NP_00108152 | 0     | 0     | 0     | 2.13  | 0     | 0     | 8.92  | 10.02 | 0.64  | 0     | 0     | 12.73 |
| 2-3.c63455/12/2006 | PREDICTED: STAM-bindin          | 847108531 | XP_01281402 | 0     | 0     | 0.36  | 1.36  | 0     | 0     | 2.56  | 0     | 2.39  | 9.7   | 6.9   | 1.79  |
| 2-3.c63615/1/1860  | PREDICTED: keratin, type II     | 795360232 | XP_01178596 | 5.65  | 6.76  | 8.82  | 2.84  | 5.94  | 0     | 3.41  | 2.96  | 2.97  | 0     | 0     | 0     |
| 3-6.c2263/4/3494   | PREDICTED: catenin beta-1-      | 573895693 | XP_00663555 | 0     | 0     | 0     | 0     | 10.24 | 16.15 | 0     | 2.74  | 0     | 25.78 | 18.06 | 0.05  |
| 3-6.c2421/16/2779  | cyclin-dependent kinase inhib   | 168693517 | NP_00110827 | 0.04  | 13.68 | 6.26  | 3.28  | 18.55 | 0     | 0     | 0.69  | 0     | 0     | 0     | 0     |
| 3-6.c2820/6/3827   | vigilin [Xenopus (Silurana) tr  | 55742112  | NP_00100685 | 0     | 7.56  | 2.88  | 2.22  | 0     | 0     | 4.47  | 0.35  | 0     | 0     | 0     | 0     |
| 3-6.c2877/4/3189   | PREDICTED: nebulin isofon       | 847166508 | XP_01282661 | 4.89  | 0     | 3.33  | 0     | 0     | 0     | 0     | 0     | 0     | 0     | 0     | 0     |
| 3-6.c3556/4/3493   | profilin-2 [Xenopus (Silurana   | 62859423  | NP_00101605 | 7.42  | 9.53  | 8.05  | 5.18  | 3.64  | 2.35  | 2.63  | 5.95  | 1.72  | 1.61  | 0.58  | 0.77  |
| 3-6.c3844/4/2748   | PREDICTED: collagen alpha       | 847130150 | XP_01281895 | 3.55  | 14.79 | 7.23  | 2.83  | 0     | 0     | 7.89  | 0     | 7.48  | 0     | 0     | 1.4   |
| 3-6.c4196/1/3592   | PREDICTED: NACHT, LRR           | 699666029 | XP_00988355 | 0     | 0     | 0     | 7.56  | 1.92  | 0     | 0     | 8.08  | 11.96 | 0.11  | 15.03 | 8.42  |
| 3-6.c4295/1/3409   | importin-4 [Xenopus (Siluran    | 315707014 | NP_00100801 | 2.79  | 6.07  | 2.62  | 0.84  | 1.32  | 8.96  | 1.19  | 0.85  | 0.55  | 0.07  | 0.21  | 0.03  |
| 3-6.c4314/1/3336   | PREDICTED: spectrin alpha       | 847152581 | XP_01282324 | 2.91  | 3.87  | 0.64  | 2.83  | 0.25  | 0     | 2.15  | 0     | 2.79  | 0.24  | 0     | 0     |
| 3-6.c5625/1/3448   | PREDICTED: von Willebran        | 847103802 | XP_01281315 | 0     | 0     | 0     | 1.8   | 1.38  | 0     | 0     | 0     | 0.1   | 2.14  | 2.67  | 0     |
| 3-6.c5795/1/2929   | PREDICTED: N-alpha-acety        | 729723264 | XP_01057483 | 0.22  | 2.94  | 1.42  | 0     | 0     | 0     | 0     | 1.42  | 0.78  | 0     | 0     | 0     |
| 3-6.c5821/1/3249.1 | PREDICTED: target of Nesh       | 542203441 | XP_00547555 | 0.09  | 3.6   | 1.09  | 0.08  | 0.7   | 6.15  | 0     | 0.28  | 0.08  | 0     | 0     | 0     |
| 3-6.c5936/1/3201   | PREDICTED: serine/threonin      | 512819921 | XP_00491168 | 0     | 0     | 0     | 0.59  | 0     | 0     | 1.59  | 0     | 0     | 3.62  | 2.6   | 0     |
| 3-6.c5940/1/2788.1 | PREDICTED: DNA damage-          | 348560393 | XP_00346595 | 4.56  | 1.56  | 2.25  | 0     | 0     | 0     | 0     | 0     | 0     | 0     | 0     | 0     |
| 3-6.c6437/1/3419   | RecName: Full=Coiled-coil d     | 123892992 | Q28G12.1    | 1.33  | 3.01  | 0.7   | 0     | 1.09  | 0.36  | 0.85  | 0     | 1.57  | 0.11  | 0     | 0     |
| 3-6.c6560/3/3081.1 | MHC class II beta-chain, part   | 726968496 | AIY53001.1  | 2.39  | 1.75  | 2.59  | 1.12  | 0     | 0.56  | 0.38  | 1.94  | 0     | 0     | 0     | 0     |
| 3-6.c6836/1/3338   | PREDICTED: nebulin isofon       | 847166512 | XP_01282661 | 18.93 | 18.17 | 0     | 0.01  | 25.62 | 0.92  | 0     | 0     | 0     | 0     | 0     | 0     |
| 3-6.c6860/1/3324.2 | PREDICTED: ubiquitin carbo      | 719774765 | XP_01022040 | 0.01  | 0     | 0     | 0     | 0     | 2.98  | 0.82  | 2.58  | 0     | 17    | 48.77 | 6.94  |
| 3-6.c6948/3/3149   | PREDICTED: bcl-2-associat       | 847126738 | XP_01281815 | 1.51  | 4.87  | 1.45  | 0     | 0.86  | 2.14  | 0.95  | 0.64  | 0.31  | 0.31  | 0     | 0     |

|                      |                                |           |             |       |       |       |       |      |       |      |      |       |      |      |       |
|----------------------|--------------------------------|-----------|-------------|-------|-------|-------|-------|------|-------|------|------|-------|------|------|-------|
| 3-6.c7299/1/3683     | PREDICTED: collagen alpha      | 512867463 | XP_00293207 | 10.3  | 72.68 | 28.93 | 8.75  | 6.05 | 37.38 | 5.92 | 1.43 | 11.13 | 0    | 0    | 2.38  |
| 3-6.c7795/1/2729.1-- | --                             | --        | --          | 10.4  | 5.84  | 9.66  | 9.88  | 0    | 0     | 0    | 5.11 | 0.11  | 0    | 0    | 0     |
| 3-6.c8144/1/2798.1   | Collagen alpha-2(VI) chain, f  | 565318950 | ETE70123.1  | 17.02 | 7.97  | 13.1  | 6.3   | 4.09 | 0.37  | 0.98 | 7.29 | 2.98  | 0    | 0    | 0     |
| 3-6.c8254/1/3164     | PREDICTED: DDB1- and Cl        | 512862186 | XP_00293537 | 0     | 0     | 0     | 0     | 0    | 1.09  | 0.88 | 5.84 | 0.51  | 5.54 | 2.48 | 3.39  |
| 3-6.c8319/2/3083     | PREDICTED: filamin-A isof      | 847155161 | XP_01282406 | 2.08  | 6.46  | 7.31  | 0     | 0    | 9.06  | 0    | 5.83 | 0     | 0    | 0    | 0     |
| 3-6.c8547/1/3362     | PREDICTED: transcription e     | 512819310 | XP_00491166 | 0.08  | 14.22 | 2.06  | 0     | 0.59 | 12.05 | 0    | 0.72 | 0     | 0    | 0    | 0     |
| 3-6.c8713/1/2915.2   | E3 ubiquitin-protein ligase M  | 62858193  | NP_00101691 | 0     | 0     | 0     | 0     | 0    | 0.63  | 0    | 0    | 2.1   | 8.58 | 6.12 | 4.25  |
| 3-6.e10459/1/2744    | PREDICTED: angiopoietin-n      | 634857825 | XP_00794251 | 1.16  | 2.91  | 1.69  | 0     | 0    | 1.41  | 0    | 0    | 0     | 3.15 | 0.66 | 0     |
| 3-6.c10710/1/2755    | heavy chain 6 cardiac muscle   | 388242704 | AFK15622.1  | 0.86  | 5.39  | 2.43  | 0     | 0    | 0.03  | 1.93 | 7.15 | 1.86  | 0.89 | 0    | 1.8   |
| 3-6.c10790/1/3187    | PREDICTED: glycine dehydi      | 512813230 | XP_00293422 | 0     | 0     | 0     | 0.69  | 0    | 0     | 7.48 | 0    | 0.26  | 0    | 4.71 | 7.78  |
| 3-6.e10815/1/3255    | PREDICTED: synaptopodin        | 301612611 | XP_00293581 | 3.7   | 4.94  | 1.83  | 1.85  | 1.61 | 14.65 | 0.69 | 1.05 | 1.07  | 0    | 0    | 0.35  |
| 3-6.e11051/1/3707    | DNA polymerase delta cataly    | 113931510 | NP_00103920 | 0.36  | 3.6   | 0.53  | 0     | 0.18 | 0.32  | 0.26 | 0.35 | 0.29  | 0    | 0    | 0     |
| 3-6.c11562/1/2885    | PREDICTED: myocilin [Xen       | 512836045 | XP_00293415 | 0     | 0     | 0     | 0     | 8.55 | 0.05  | 9.13 | 6.08 | 0     | 0.93 | 1.04 | 0.82  |
| 3-6.e13061/2/3077    | PREDICTED: catenin beta-1-     | 573895693 | XP_00663555 | 0.01  | 66    | 14.41 | 0.07  | 0    | 0     | 0    | 3.78 | 0     | 0    | 0    | 0     |
| 3-6.e14063/1/3289    | PREDICTED: E3 ubiquitin-p      | 512838975 | XP_00491420 | 0     | 0     | 0     | 1.59  | 0    | 0.64  | 0    | 1.26 | 1.73  | 1.53 | 1.29 | 2.26  |
| 3-6.c14261/1/2908    | spastin [Xenopus laevis]>gij8  | 148231546 | NP_00108672 | 0.91  | 10.49 | 6.12  | 0.78  | 0.1  | 0     | 0    | 0    | 0     | 0    | 0    | 2.69  |
| 3-6.e14395/1/2662    | zinc transporter 7-A [Xenopu   | 147906284 | NP_00108942 | 4.37  | 9.82  | 3.18  | 0     | 2.03 | 2.45  | 0    | 0    | 0     | 0    | 0    | 11.34 |
| 3-6.c14544/1/3195    | PREDICTED: MIP18 family        | 301606783 | XP_00293295 | 1.4   | 3.4   | 0     | 0.97  | 0    | 0.15  | 0    | 0    | 0     | 0    | 0    | 0     |
| 3-6.c14711/2/3327    | PREDICTED: pre-mRNA-pr         | 847162749 | XP_01282561 | 0.17  | 3.16  | 0.56  | 0     | 0    | 0     | 0    | 0    | 0     | 0    | 0    | 0     |
| 3-6.e15003/1/3224    | Nucleoprotein TPR, partial [C  | 697445750 | KGL86452.1  | 1.28  | 3.58  | 1.3   | 0.31  | 1.8  | 0.15  | 0.18 | 1.13 | 0.56  | 0    | 0.08 | 0.18  |
| 3-6.e15547/1/3120    | cadherin-2 precursor [Xenopt   | 188528929 | NP_00112085 | 0.73  | 1.48  | 0.84  | 0.27  | 0    | 1.24  | 0.15 | 0.38 | 0     | 0    | 0    | 0     |
| 3-6.c15615/1/2894    | Guanine nucleotide-binding f   | 226372634 | ACO51942.1  | 3.51  | 6.85  | 3.93  | 1.84  | 2.52 | 0     | 1.37 | 2.08 | 1.81  | 0.4  | 0.05 | 0.6   |
| 3-6.e15688/1/2756    | clathrin, heavy chain (Hc) [X  | 148231021 | NP_00108586 | 0.73  | 6.29  | 0.98  | 0     | 3.41 | 0     | 0    | 0    | 0     | 0    | 0    | 0     |
| 3-6.e15964/1/3916    | PREDICTED: protein FAM1        | 530638059 | XP_00530584 | 2.72  | 7.19  | 3.72  | 2.29  | 5.77 | 0.93  | 0.35 | 0.79 | 2.42  | 0.61 | 0.07 | 0.25  |
| 3-6.c16139/1/3102    | PREDICTED: dickkopf-relat      | 301622013 | XP_00294033 | 3.23  | 19.6  | 4.84  | 4.01  | 3.43 | 2.84  | 0    | 1.96 | 1.69  | 0.73 | 1.51 | 0     |
| 3-6.e16165/1/2871    | replication factor C subunit 1 | 313760612 | NP_00118645 | 9.28  | 27.31 | 5.28  | 5.4   | 3.13 | 4.83  | 1.85 | 6.42 | 2.67  | 0.77 | 0.97 | 1.49  |
| 3-6.c16516/1/3093    | PREDICTED: laminin subun       | 512844752 | XP_00293635 | 8.69  | 4.71  | 5.77  | 5.38  | 0    | 0     | 4.38 | 5.44 | 0     | 0    | 0    | 0.48  |
| 3-6.c16896/1/3338    | PREDICTED: cold shock dot      | 847087986 | XP_01281925 | 0     | 0     | 0.01  | 0.66  | 0    | 0.01  | 3.54 | 2.93 | 0     | 0.12 | 0    | 11.18 |
| 3-6.e16960/1/3804    | PREDICTED: LOW QUALI           | 558146048 | XP_00611955 | 0     | 0     | 0     | 0     | 0.36 | 1.41  | 2.04 | 1.9  | 0     | 0    | 0    | 2.97  |
| 3-6.c17082/1/2858    | hypothetical protein EH28_0:   | 808879603 | KKF27606.1  | 7.71  | 7.94  | 14.93 | 7.83  | 0    | 0     | 0    | 4.34 | 0     | 0    | 0    | 0     |
| 3-6.c17694/7/2933    | --                             | --        | --          | 11.44 | 6.02  | 10.29 | 10.83 | 0.28 | 0.17  | 0.36 | 6.15 | 0     | 0    | 0.27 | 0.18  |
| 3-6.e18185/1/2750    | CD82 molecule [Xenopus lae     | 148234160 | NP_00108581 | 0     | 0     | 0     | 1.2   | 0    | 0     | 0    | 0    | 0.18  | 1.38 | 0.16 | 2.73  |
| 3-6.c18261/1/2819    | PREDICTED: probable ATP.       | 591372795 | XP_00706105 | 0.55  | 2.73  | 0.76  | 0.11  | 0.31 | 2.12  | 0.48 | 0    | 0.78  | 0    | 0    | 0     |
| 3-6.c18327/1/3138    | forkhead box protein K2 [Xei   | 213982945 | NP_00113563 | 3.15  | 13.61 | 4.73  | 2.46  | 3    | 0.56  | 1.82 | 0.97 | 2.38  | 0    | 0    | 1.8   |
| 3-6.e19028/3/3006    | PREDICTED: cytochrome P:       | 512848263 | XP_00293785 | 6.24  | 16.42 | 3.12  | 0.26  | 0    | 0     | 0    | 2.36 | 1.68  | 2.34 | 0    | 4.79  |
