# Supplementary material for: Gene Expression Program Underlying Tail Resorption During Thyroid Hormone-Dependent Metamorphosis of the Ornamented Pygmy Frog Microhyla fissipes
Source: PubMed Central journal article supplement (PMC6357680; doi:10.3389/fendo.2019.00011), 2019-01-25
Supplement: Table_3.pdf [file Table_3.pdf]

**Table S3.** Enriched KEGG pathways among the up-regulated genes during tail resorption.

The 1,030 genes in the upregulated clusters 5, 8, 13, 21, 23, 26, in Fig. 6, were combined and analyzed. Eleven pathways were found to be significantly enriched ( $p < 0.01$ , ranking by p value).

| KEGG Pathway                                  | Pathway ID | Enriched Genes | Background Genes | p-Value  | q-Value |
|-----------------------------------------------|------------|----------------|------------------|----------|---------|
| Vitamin digestion and absorption              | ko04977    | 6              | 40               | 0.000403 | 0.07461 |
| Glycosphingolipid biosynthesis globo series   | ko00603    | 4              | 15               | 0.000599 | 0.07461 |
| Other glycan degradation                      | ko00511    | 6              | 57               | 0.002157 | 0.13887 |
| Vibrio cholerae infection                     | ko05110    | 14             | 259              | 0.002258 | 0.13887 |
| Bladder cancer                                | ko05219    | 9              | 129              | 0.002788 | 0.13887 |
| Parkinson's disease                           | ko05012    | 15             | 306              | 0.003864 | 0.15907 |
| Vitamin B6 metabolism                         | ko00750    | 4              | 28               | 0.004472 | 0.15907 |
| Lysosome                                      | ko04142    | 21             | 517              | 0.005975 | 0.17136 |
| Glycosphingolipid biosynthesis ganglio series | ko00604    | 4              | 31               | 0.006194 | 0.17136 |
| Retinol metabolism                            | ko00830    | 10             | 181              | 0.007867 | 0.1959  |
| Gap junction                                  | ko04540    | 13             | 274              | 0.008767 | 0.19845 |
