# Supplementary material for: Gene Expression Program Underlying Tail Resorption During Thyroid Hormone-Dependent Metamorphosis of the Ornamented Pygmy Frog Microhyla fissipes
Source: PubMed Central journal article supplement (PMC6357680; doi:10.3389/fendo.2019.00011), 2019-01-25
Supplement: Table_4.pdf [file Table_4.pdf]

**Table S4.** Enriched GO terms among the up-regulated genes during tail resorption.

The 1,030 genes in the upregulated clusters 5, 8, 13, 21, 23, 26, in Fig. 6, were combined and analyzed. Eighty-eight significantly enriched ( $p < 0.01$ , ranking by  $p$  value) GO terms were found.

| GO_accession | Description                                                                                                                                                                    | Term_type          | p-Value    | q-Value | Enriched Genes | Background Genes |
|--------------|--------------------------------------------------------------------------------------------------------------------------------------------------------------------------------|--------------------|------------|---------|----------------|------------------|
| GO:0006508   | proteolysis                                                                                                                                                                    | biological_process | 1.97E-05   | 0.13829 | 60             | 2187             |
| GO:0006810   | transport                                                                                                                                                                      | biological_process | 9.92E-05   | 0.16396 | 159            | 7641             |
| GO:0004175   | endopeptidase activity                                                                                                                                                         | molecular_function | 0.00011712 | 0.16396 | 35             | 1105             |
| GO:0051234   | establishment of localization                                                                                                                                                  | biological_process | 0.00012829 | 0.16396 | 159            | 7682             |
| GO:0015929   | hexosaminidase activity                                                                                                                                                        | molecular_function | 0.00013785 | 0.16396 | 4              | 14               |
| GO:0008233   | peptidase activity                                                                                                                                                             | molecular_function | 0.00014028 | 0.16396 | 51             | 1861             |
| GO:0005737   | cytoplasm                                                                                                                                                                      | cellular_component | 0.00016831 | 0.16862 | 151            | 7215             |
| GO:0070011   | peptidase activity, acting on L-amino acid peptides                                                                                                                            | molecular_function | 0.00023691 | 0.20768 | 47             | 1707             |
| GO:0004563   | beta-N-acetylhexosaminidase activity                                                                                                                                           | molecular_function | 0.00043527 | 0.29156 | 3              | 8                |
| GO:0004222   | metalloendopeptidase activity                                                                                                                                                  | molecular_function | 0.00043852 | 0.29156 | 14             | 328              |
| GO:0051179   | localization                                                                                                                                                                   | biological_process | 0.00045732 | 0.29156 | 163            | 8123             |
| GO:0007517   | muscle organ development                                                                                                                                                       | biological_process | 0.00052462 | 0.30606 | 5              | 45               |
| GO:0005739   | mitochondrion                                                                                                                                                                  | cellular_component | 0.00061814 | 0.30606 | 31             | 995              |
| GO:0006687   | glycosphingolipid metabolic process                                                                                                                                            | biological_process | 0.00061944 | 0.30606 | 6              | 59               |
| GO:0012505   | endomembrane system                                                                                                                                                            | cellular_component | 0.00065462 | 0.30606 | 49             | 1927             |
| GO:0044429   | mitochondrial part                                                                                                                                                             | cellular_component | 0.00077083 | 0.33786 | 25             | 761              |
| GO:1902578   | single-organism localization                                                                                                                                                   | biological_process | 0.00093391 | 0.38526 | 116            | 5531             |
| GO:0044765   | single-organism transport                                                                                                                                                      | biological_process | 0.0011363  | 0.4427  | 113            | 5396             |
| GO:0019538   | protein metabolic process                                                                                                                                                      | biological_process | 0.0012224  | 0.45118 | 147            | 7350             |
| GO:0006869   | lipid transport                                                                                                                                                                | biological_process | 0.0013097  | 0.45924 | 13             | 314              |
| GO:0044444   | cytoplasmic part                                                                                                                                                               | cellular_component | 0.001848   | 0.4983  | 110            | 5293             |
| GO:0006665   | sphingolipid metabolic process                                                                                                                                                 | biological_process | 0.0019179  | 0.4983  | 6              | 75               |
| GO:0034214   | protein hexamerization                                                                                                                                                         | biological_process | 0.0020467  | 0.4983  | 3              | 21               |
| GO:0031967   | organelle envelope                                                                                                                                                             | cellular_component | 0.0020555  | 0.4983  | 24             | 791              |
| GO:0016715   | oxidoreductase activity, acting on paired donors, with incorporation or reduction of molecular oxygen, reduced ascorbate as one donor, and incorporation of one atom of oxygen | molecular_function | 0.0021313  | 0.4983  | 2              | 5                |
| GO:0008237   | metallopeptidase activity                                                                                                                                                      | molecular_function | 0.0021555  | 0.4983  | 16             | 455              |
| GO:0031975   | envelope                                                                                                                                                                       | cellular_component | 0.0021777  | 0.4983  | 25             | 837              |
| GO:0008483   | transaminase activity                                                                                                                                                          | molecular_function | 0.0022598  | 0.4983  | 6              | 89               |
| GO:0008053   | mitochondrial fusion                                                                                                                                                           | biological_process | 0.002269   | 0.4983  | 6              | 86               |
| GO:0005741   | mitochondrial outer membrane                                                                                                                                                   | cellular_component | 0.0022945  | 0.4983  | 11             | 240              |
| GO:0031090   | organelle membrane                                                                                                                                                             | cellular_component | 0.0023213  | 0.4983  | 43             | 1742             |
| GO:0010876   | lipid localization                                                                                                                                                             | biological_process | 0.0023596  | 0.4983  | 13             | 333              |

|            |                                                              |                    |           |         |     |       |
|------------|--------------------------------------------------------------|--------------------|-----------|---------|-----|-------|
| GO:0031968 | organelle outer membrane                                     | cellular_component | 0.0024201 | 0.4983  | 11  | 242   |
| GO:0005740 | mitochondrial envelope                                       | cellular_component | 0.0024903 | 0.4983  | 21  | 659   |
| GO:0008641 | small protein activating enzyme activity                     | molecular_function | 0.0025526 | 0.4983  | 5   | 70    |
| GO:0008289 | lipid binding                                                | molecular_function | 0.002558  | 0.4983  | 21  | 669   |
| GO:0001575 | globoside metabolic process                                  | biological_process | 0.0029215 | 0.52585 | 3   | 16    |
| GO:0006509 | membrane protein ectodomain proteolysis                      | biological_process | 0.0029426 | 0.52585 | 2   | 5     |
| GO:0033619 | membrane protein proteolysis                                 | biological_process | 0.0029426 | 0.52585 | 2   | 5     |
| GO:0098588 | bounding membrane of organelle                               | cellular_component | 0.0030902 | 0.52585 | 34  | 1322  |
| GO:0031419 | cobalamin binding                                            | molecular_function | 0.0031276 | 0.52585 | 3   | 17    |
| GO:0003824 | catalytic activity                                           | molecular_function | 0.0032031 | 0.52585 | 331 | 18458 |
| GO:0031966 | mitochondrial membrane                                       | cellular_component | 0.0032242 | 0.52585 | 20  | 628   |
| GO:0016769 | transferase activity, transferring nitrogenous groups        | molecular_function | 0.0033606 | 0.53563 | 6   | 95    |
| GO:0004252 | serine-type endopeptidase activity                           | molecular_function | 0.0036532 | 0.56099 | 10  | 218   |
| GO:0005783 | endoplasmic reticulum                                        | cellular_component | 0.0038488 | 0.56099 | 28  | 1029  |
| GO:0071702 | organic substance transport                                  | biological_process | 0.0038648 | 0.56099 | 75  | 3512  |
| GO:0003994 | aconitate hydratase activity                                 | molecular_function | 0.003901  | 0.56099 | 3   | 21    |
| GO:0005244 | voltage-gated ion channel activity                           | molecular_function | 0.0041069 | 0.56099 | 7   | 139   |
| GO:0022832 | voltage-gated channel activity                               | molecular_function | 0.0041069 | 0.56099 | 7   | 139   |
| GO:0008135 | translation factor activity, RNA binding                     | molecular_function | 0.0042731 | 0.56099 | 12  | 324   |
| GO:0016877 | ligase activity, forming carbon-sulfur bonds                 | molecular_function | 0.0042796 | 0.56099 | 5   | 79    |
| GO:0019825 | oxygen binding                                               | molecular_function | 0.0043302 | 0.56099 | 3   | 17    |
| GO:0004012 | phospholipid-translocating ATPase activity                   | molecular_function | 0.0044374 | 0.56099 | 2   | 7     |
| GO:0015917 | aminophospholipid transport                                  | biological_process | 0.0044374 | 0.56099 | 2   | 7     |
| GO:0051259 | protein oligomerization                                      | biological_process | 0.0044796 | 0.56099 | 13  | 401   |
| GO:0005548 | phospholipid transporter activity                            | molecular_function | 0.0048885 | 0.59109 | 2   | 8     |
| GO:0015914 | phospholipid transport                                       | biological_process | 0.0048885 | 0.59109 | 2   | 8     |
| GO:0061061 | muscle structure development                                 | biological_process | 0.0052152 | 0.6199  | 5   | 77    |
| GO:0048284 | organelle fusion                                             | biological_process | 0.0053538 | 0.62577 | 6   | 109   |
| GO:0006448 | regulation of translational elongation                       | biological_process | 0.0058647 | 0.64647 | 5   | 85    |
| GO:0042157 | lipoprotein metabolic process                                | biological_process | 0.0059155 | 0.64647 | 9   | 222   |
| GO:0000726 | non-recombinational repair                                   | biological_process | 0.0060105 | 0.64647 | 3   | 22    |
| GO:0006303 | double-strand break repair via nonhomologous end joining     | biological_process | 0.0060105 | 0.64647 | 3   | 22    |
| GO:0006629 | lipid metabolic process                                      | biological_process | 0.0061326 | 0.64647 | 34  | 1312  |
| GO:0044255 | cellular lipid metabolic process                             | biological_process | 0.0061648 | 0.64647 | 27  | 975   |
| GO:0030354 | melanin-concentrating hormone activity                       | molecular_function | 0.0061762 | 0.64647 | 2   | 6     |
| GO:0006414 | translational elongation                                     | biological_process | 0.0063255 | 0.6506  | 5   | 86    |
| GO:0070647 | protein modification by small protein conjugation or removal | biological_process | 0.0064012 | 0.6506  | 29  | 1182  |
| GO:0006099 | tricarboxylic acid cycle                                     | biological_process | 0.0071633 | 0.67668 | 7   | 141   |
| GO:0006101 | citrate metabolic process                                    | biological_process | 0.0071633 | 0.67668 | 7   | 141   |
| GO:0044801 | single-organism membrane fusion                              | biological_process | 0.0072858 | 0.67668 | 6   | 115   |
| GO:0072350 | tricarboxylic acid metabolic process                         | biological_process | 0.0073579 | 0.67668 | 7   | 142   |

|            |                                                    |                    |           |         |    |      |
|------------|----------------------------------------------------|--------------------|-----------|---------|----|------|
| GO:0004348 | glucosylceramidase activity                        | molecular_function | 0.0073945 | 0.67668 | 2  | 7    |
| GO:0030170 | pyridoxal phosphate binding                        | molecular_function | 0.0074189 | 0.67668 | 9  | 225  |
| GO:0098805 | whole membrane                                     | cellular_component | 0.0074805 | 0.67668 | 19 | 662  |
| GO:0006417 | regulation of translation                          | biological_process | 0.0075262 | 0.67668 | 13 | 406  |
| GO:0034248 | regulation of cellular amide metabolic process     | biological_process | 0.0075262 | 0.67668 | 13 | 406  |
| GO:0006820 | anion transport                                    | biological_process | 0.0081605 | 0.72336 | 14 | 454  |
| GO:0008199 | ferric iron binding                                | molecular_function | 0.0082517 | 0.72336 | 4  | 52   |
| GO:0035101 | FACT complex                                       | cellular_component | 0.0083602 | 0.72383 | 2  | 11   |
| GO:0016885 | ligase activity, forming carbon-carbon bonds       | molecular_function | 0.0086802 | 0.72476 | 4  | 50   |
| GO:0003746 | translation elongation factor activity             | molecular_function | 0.0089373 | 0.72476 | 4  | 49   |
| GO:0032446 | protein modification by small protein conjugation  | biological_process | 0.0090226 | 0.72476 | 25 | 999  |
| GO:0010608 | posttranscriptional regulation of gene expression  | biological_process | 0.0090623 | 0.72476 | 13 | 419  |
| GO:0016838 | carbon-oxygen lyase activity, acting on phosphates | molecular_function | 0.0094076 | 0.72476 | 3  | 29   |
| GO:0019028 | viral capsid                                       | cellular_component | 0.0095691 | 0.72476 | 31 | 1213 |
| GO:0019012 | virion                                             | cellular_component | 0.0097053 | 0.72476 | 39 | 1642 |
