# Supplementary material for: Gene Expression Program Underlying Tail Resorption During Thyroid Hormone-Dependent Metamorphosis of the Ornamented Pygmy Frog Microhyla fissipes
Source: PubMed Central journal article supplement (PMC6357680; doi:10.3389/fendo.2019.00011), 2019-01-25
Supplement: Table_6.pdf [file Table_6.pdf]

**Table S6.** Enriched KEGG pathways among the down-regulated genes during tail resorption. 1,596 genes in the down-regulated cluster-3, 9, 10, 12, 20, 22, 25 in Fig. 6, were combined and analyzed. Twenty-one pathways were found to be significantly enriched ( $q < 0.05$ , ranking by  $q$  value).

| KEGG Pathway                               | Pathway ID | Enriched Genes | Background Genes | p-Value    | q-Value     |
|--------------------------------------------|------------|----------------|------------------|------------|-------------|
| Tight junction                             | ko04530    | 110            | 1367             | 1.33E-14   | 3.51E-12    |
| Valine, leucine and isoleucine degradation | ko00280    | 31             | 247              | 6.81E-09   | 8.99E-07    |
| Aminoacyl-tRNA biosynthesis                | ko00970    | 25             | 186              | 5.77E-08   | 5.07E-06    |
| Cardiac muscle contraction                 | ko04260    | 38             | 401              | 1.45E-07   | 9.59E-06    |
| ECM-receptor interaction                   | ko04512    | 53             | 687              | 3.01E-07   | 1.59E-05    |
| Protein digestion and absorption           | ko04974    | 46             | 617              | 4.07E-06   | 0.000179255 |
| Citrate cycle (TCA cycle)                  | ko00020    | 23             | 218              | 8.14E-06   | 0.00030707  |
| Focal adhesion                             | ko04510    | 75             | 1341             | 9.16E-05   | 0.002765869 |
| Propanoate metabolism                      | ko00640    | 17             | 158              | 9.43E-05   | 0.002765869 |
| Pyruvate metabolism                        | ko00620    | 19             | 196              | 0.00013392 | 0.003535594 |
| Parkinson's disease                        | ko05012    | 25             | 306              | 0.00016526 | 0.003966171 |
| Adrenergic signaling in cardiomyocytes     | ko04261    | 43             | 678              | 0.00025602 | 0.005632485 |
| Starch and sucrose metabolism              | ko00500    | 18             | 195              | 0.00034301 | 0.006647452 |
| Glycolysis / Gluconeogenesis               | ko00010    | 36             | 542              | 0.00035252 | 0.006647452 |
| Glyoxylate and dicarboxylate metabolism    | ko00630    | 17             | 181              | 0.00041185 | 0.007248551 |
| Purine metabolism                          | ko00230    | 28             | 402              | 0.00077144 | 0.012728804 |
| Tyrosine metabolism                        | ko00350    | 11             | 100              | 0.00130962 | 0.020262416 |
| PI3K-Akt signaling pathway                 | ko04151    | 67             | 1293             | 0.00138153 | 0.020262416 |
| Galactose metabolism                       | ko00052    | 13             | 139              | 0.00194271 | 0.026993456 |
| Glycine, serine and threonine metabolism   | ko00260    | 15             | 186              | 0.00346062 | 0.045642838 |
| Alzheimer's disease                        | ko05010    | 36             | 626              | 0.00363068 | 0.045642838 |
