# Supplementary material for: Gene Expression Program Underlying Tail Resorption During Thyroid Hormone-Dependent Metamorphosis of the Ornamented Pygmy Frog Microhyla fissipes
Source: PubMed Central journal article supplement (PMC6357680; doi:10.3389/fendo.2019.00011), 2019-01-25
Supplement: Table_7.pdf [file Table_7.pdf]

**Table S7.** Enriched GO terms among the down-regulated genes during tail resorption. 1,596 genes in the down-regulated cluster-3, 9, 10, 12, 20, 22, 25 in Fig. 6, were combined and analyzed, and 499 significantly enriched ( $p < 0.05$ , ranking by q value) GO terms were addressed.

| GO_accession | Description                                                                        | p-Value  | q-Value  | DETs | Background genes |
|--------------|------------------------------------------------------------------------------------|----------|----------|------|------------------|
| GO:0005882   | intermediate filament                                                              | 8.82E-26 | 3.09E-22 | 104  | 1019             |
| GO:0045111   | intermediate filament cytoskeleton                                                 | 8.82E-26 | 3.09E-22 | 104  | 1019             |
| GO:0015629   | actin cytoskeleton                                                                 | 4.65E-23 | 1.09E-19 | 100  | 983              |
| GO:0016459   | myosin complex                                                                     | 1.60E-22 | 2.80E-19 | 92   | 850              |
| GO:0005856   | cytoskeleton                                                                       | 1.95E-18 | 2.73E-15 | 172  | 2839             |
| GO:0003774   | motor activity                                                                     | 1.52E-17 | 1.78E-14 | 94   | 1075             |
| GO:0044430   | cytoskeletal part                                                                  | 1.07E-16 | 9.75E-14 | 154  | 2526             |
| GO:0006606   | protein import into nucleus                                                        | 1.67E-16 | 9.75E-14 | 75   | 849              |
| GO:0034504   | protein localization to nucleus                                                    | 1.67E-16 | 9.75E-14 | 75   | 849              |
| GO:0044744   | protein targeting to nucleus                                                       | 1.67E-16 | 9.75E-14 | 75   | 849              |
| GO:0051170   | nuclear import                                                                     | 1.67E-16 | 9.75E-14 | 75   | 849              |
| GO:1902593   | single-organism nuclear import                                                     | 1.67E-16 | 9.75E-14 | 75   | 849              |
| GO:0006913   | nucleocytoplasmic transport                                                        | 5.37E-16 | 2.90E-13 | 77   | 908              |
| GO:0051169   | nuclear transport                                                                  | 6.98E-16 | 3.30E-13 | 77   | 912              |
| GO:0017038   | protein import                                                                     | 7.06E-16 | 3.30E-13 | 78   | 931              |
| GO:0016462   | pyrophosphatase activity                                                           | 2.76E-15 | 1.21E-12 | 170  | 2922             |
| GO:0006605   | protein targeting                                                                  | 3.35E-15 | 1.38E-12 | 86   | 1116             |
| GO:0072594   | establishment of protein localization to organelle                                 | 4.26E-15 | 1.66E-12 | 83   | 1055             |
| GO:0017111   | nucleoside-triphosphatase activity                                                 | 8.38E-15 | 3.09E-12 | 168  | 2908             |
| GO:0043623   | cellular protein complex assembly                                                  | 9.62E-15 | 3.37E-12 | 99   | 1418             |
| GO:0016818   | hydrolase activity, acting on acid anhydrides, in phosphorus-containing anhydrides | 1.10E-14 | 3.68E-12 | 171  | 2991             |
| GO:0036094   | small molecule binding                                                             | 1.94E-14 | 6.18E-12 | 299  | 6416             |
| GO:0005198   | structural molecule activity                                                       | 4.23E-14 | 1.29E-11 | 162  | 2843             |
| GO:0001775   | cell activation                                                                    | 4.44E-14 | 1.30E-11 | 65   | 762              |
| GO:0051258   | protein polymerization                                                             | 4.69E-14 | 1.32E-11 | 70   | 875              |
| GO:0005577   | fibrinogen complex                                                                 | 5.07E-14 | 1.32E-11 | 64   | 747              |
| GO:0030168   | platelet activation                                                                | 5.07E-14 | 1.32E-11 | 64   | 747              |
| GO:1902580   | single-organism cellular localization                                              | 1.27E-13 | 3.18E-11 | 85   | 1168             |
| GO:0000166   | nucleotide binding                                                                 | 1.87E-13 | 4.37E-11 | 289  | 6257             |
| GO:1901265   | nucleoside phosphate binding                                                       | 1.87E-13 | 4.37E-11 | 289  | 6257             |
| GO:0016482   | cytoplasmic transport                                                              | 1.98E-13 | 4.47E-11 | 89   | 1255             |
| GO:0007596   | blood coagulation                                                                  | 2.18E-13 | 4.78E-11 | 64   | 775              |
| GO:0033365   | protein localization to organelle                                                  | 2.55E-13 | 5.42E-11 | 84   | 1158             |
| GO:0030674   | protein binding, bridging                                                          | 3.65E-13 | 7.31E-11 | 64   | 779              |
| GO:0060090   | binding, bridging                                                                  | 3.65E-13 | 7.31E-11 | 64   | 779              |
| GO:1902582   | single-organism intracellular transport                                            | 3.93E-13 | 7.65E-11 | 113  | 1746             |
| GO:0016817   | hydrolase activity, acting on acid anhydrides                                      | 4.54E-13 | 8.61E-11 | 172  | 3159             |
| GO:0007599   | hemostasis                                                                         | 4.87E-13 | 8.76E-11 | 64   | 792              |
| GO:0050878   | regulation of body fluid levels                                                    | 4.87E-13 | 8.76E-11 | 64   | 792              |
| GO:0042060   | wound healing                                                                      | 6.10E-13 | 1.07E-10 | 66   | 837              |
| GO:0050817   | coagulation                                                                        | 6.24E-13 | 1.07E-10 | 64   | 796              |
| GO:0034622   | cellular macromolecular complex assembly                                           | 6.89E-13 | 1.15E-10 | 103  | 1611             |

|            |                                              |          |          |     |       |
|------------|----------------------------------------------|----------|----------|-----|-------|
| GO:0009611 | response to wounding                         | 9.47E-13 | 1.54E-10 | 66  | 846   |
| GO:0043232 | intracellular non-membrane-bounded organelle | 1.03E-12 | 1.64E-10 | 238 | 5085  |
| GO:0043228 | non-membrane-bounded organelle               | 3.14E-12 | 4.89E-10 | 239 | 5177  |
| GO:0048193 | Golgi vesicle transport                      | 3.24E-12 | 4.93E-10 | 69  | 784   |
| GO:0019898 | extrinsic component of membrane              | 5.90E-12 | 8.80E-10 | 64  | 721   |
| GO:0000921 | septin ring assembly                         | 1.63E-11 | 2.29E-09 | 45  | 414   |
| GO:0005940 | septin ring                                  | 1.63E-11 | 2.29E-09 | 45  | 414   |
| GO:0031106 | septin ring organization                     | 1.63E-11 | 2.29E-09 | 45  | 414   |
| GO:0032156 | septin cytoskeleton                          | 2.42E-11 | 3.33E-09 | 45  | 420   |
| GO:0032185 | septin cytoskeleton organization             | 2.64E-11 | 3.56E-09 | 45  | 421   |
| GO:0043168 | anion binding                                | 2.90E-11 | 3.84E-09 | 274 | 6119  |
| GO:0071822 | protein complex subunit organization         | 6.76E-11 | 8.78E-09 | 114 | 2018  |
| GO:0051015 | actin filament binding                       | 8.34E-11 | 1.06E-08 | 24  | 114   |
| GO:0006461 | protein complex assembly                     | 2.09E-10 | 2.61E-08 | 107 | 1882  |
| GO:0070271 | protein complex biogenesis                   | 2.14E-10 | 2.63E-08 | 107 | 1883  |
| GO:0070925 | organelle assembly                           | 2.28E-10 | 2.76E-08 | 58  | 719   |
| GO:0005737 | cytoplasm                                    | 3.15E-10 | 3.74E-08 | 301 | 7215  |
| GO:0043565 | sequence-specific DNA binding                | 3.67E-10 | 4.29E-08 | 83  | 1314  |
| GO:0098813 | nuclear chromosome segregation               | 6.35E-10 | 7.31E-08 | 45  | 517   |
| GO:0008092 | cytoskeletal protein binding                 | 7.41E-10 | 8.26E-08 | 98  | 1613  |
| GO:0044448 | cell cortex part                             | 7.42E-10 | 8.26E-08 | 50  | 568   |
| GO:0007155 | cell adhesion                                | 7.76E-10 | 8.51E-08 | 73  | 1074  |
| GO:0005102 | receptor binding                             | 9.86E-10 | 1.06E-07 | 87  | 1473  |
| GO:0022610 | biological adhesion                          | 1.14E-09 | 1.21E-07 | 74  | 1106  |
| GO:0065003 | macromolecular complex assembly              | 1.79E-09 | 1.87E-07 | 108 | 1978  |
| GO:0031514 | motile cilium                                | 1.94E-09 | 1.97E-07 | 52  | 671   |
| GO:0045502 | dynein binding                               | 1.94E-09 | 1.97E-07 | 50  | 678   |
| GO:0005938 | cell cortex                                  | 2.15E-09 | 2.16E-07 | 51  | 610   |
| GO:0048870 | cell motility                                | 3.19E-09 | 3.11E-07 | 64  | 941   |
| GO:0051674 | localization of cell                         | 3.19E-09 | 3.11E-07 | 64  | 941   |
| GO:0030286 | dynein complex                               | 3.56E-09 | 3.42E-07 | 52  | 736   |
| GO:0044421 | extracellular region part                    | 3.89E-09 | 3.69E-07 | 98  | 1678  |
| GO:0097367 | carbohydrate derivative binding              | 4.25E-09 | 3.97E-07 | 231 | 5204  |
| GO:0032553 | ribonucleotide binding                       | 4.44E-09 | 4.10E-07 | 225 | 5042  |
| GO:0005929 | cilium                                       | 6.97E-09 | 6.35E-07 | 52  | 698   |
| GO:0007059 | chromosome segregation                       | 8.84E-09 | 7.95E-07 | 48  | 621   |
| GO:0042802 | identical protein binding                    | 1.21E-08 | 1.08E-06 | 58  | 889   |
| GO:0035639 | purine ribonucleoside triphosphate binding   | 1.28E-08 | 1.10E-06 | 221 | 4995  |
| GO:0008134 | transcription factor binding                 | 1.28E-08 | 1.10E-06 | 61  | 948   |
| GO:0017076 | purine nucleotide binding                    | 1.29E-08 | 1.10E-06 | 224 | 5085  |
| GO:0001883 | purine nucleoside binding                    | 1.33E-08 | 1.10E-06 | 221 | 4999  |
| GO:0032550 | purine ribonucleoside binding                | 1.33E-08 | 1.10E-06 | 221 | 4999  |
| GO:0032549 | ribonucleoside binding                       | 1.34E-08 | 1.10E-06 | 221 | 5000  |
| GO:0032555 | purine ribonucleotide binding                | 1.40E-08 | 1.14E-06 | 221 | 5003  |
| GO:0001882 | nucleoside binding                           | 1.48E-08 | 1.19E-06 | 221 | 5007  |
| GO:0044699 | single-organism process                      | 1.59E-08 | 1.27E-06 | 689 | 20106 |
| GO:0043933 | macromolecular complex subunit organization  | 1.63E-08 | 1.28E-06 | 118 | 2336  |
| GO:0019752 | carboxylic acid metabolic process            | 1.93E-08 | 1.51E-06 | 146 | 3111  |
| GO:0044765 | single-organism transport                    | 2.05E-08 | 1.58E-06 | 228 | 5396  |
| GO:0046907 | intracellular transport                      | 2.15E-08 | 1.64E-06 | 136 | 2651  |

|            |                                                                          |          |          |     |      |
|------------|--------------------------------------------------------------------------|----------|----------|-----|------|
| GO:1902578 | single-organism localization                                             | 2.71E-08 | 2.04E-06 | 232 | 5531 |
| GO:0051649 | establishment of localization in cell                                    | 2.89E-08 | 2.15E-06 | 142 | 2827 |
| GO:0044711 | single-organism biosynthetic process                                     | 3.12E-08 | 2.30E-06 | 132 | 2790 |
| GO:0065008 | regulation of biological quality                                         | 3.54E-08 | 2.57E-06 | 94  | 1822 |
| GO:0048037 | cofactor binding                                                         | 3.56E-08 | 2.57E-06 | 65  | 1079 |
| GO:0070206 | protein trimerization                                                    | 3.62E-08 | 2.59E-06 | 29  | 242  |
| GO:0006082 | organic acid metabolic process                                           | 3.71E-08 | 2.60E-06 | 147 | 3171 |
| GO:0043436 | oxoacid metabolic process                                                | 3.71E-08 | 2.60E-06 | 147 | 3171 |
| GO:0005615 | extracellular space                                                      | 3.87E-08 | 2.69E-06 | 67  | 1092 |
| GO:0045995 | regulation of embryonic development                                      | 4.19E-08 | 2.88E-06 | 22  | 151  |
| GO:0072686 | mitotic spindle                                                          | 4.41E-08 | 3.01E-06 | 27  | 234  |
| GO:0044422 | organelle part                                                           | 4.47E-08 | 3.02E-06 | 278 | 6813 |
| GO:0042803 | protein homodimerization activity                                        | 4.54E-08 | 3.03E-06 | 50  | 752  |
| GO:0044446 | intracellular organelle part                                             | 6.11E-08 | 4.04E-06 | 275 | 6746 |
| GO:0040011 | locomotion                                                               | 6.59E-08 | 4.32E-06 | 70  | 1155 |
| GO:0016875 | ligase activity, forming carbon-oxygen bonds                             | 7.85E-08 | 5.05E-06 | 26  | 262  |
| GO:0016876 | ligase activity, forming aminoacyl-tRNA and related compounds            | 7.85E-08 | 5.05E-06 | 26  | 262  |
| GO:0030155 | regulation of cell adhesion                                              | 8.22E-08 | 5.22E-06 | 21  | 144  |
| GO:0010639 | negative regulation of organelle organization                            | 8.27E-08 | 5.22E-06 | 33  | 362  |
| GO:0006928 | movement of cell or subcellular component                                | 8.34E-08 | 5.22E-06 | 71  | 1185 |
| GO:0032434 | regulation of proteasomal ubiquitin-dependent protein catabolic process  | 9.81E-08 | 6.03E-06 | 31  | 324  |
| GO:0061136 | regulation of proteasomal protein catabolic process                      | 9.81E-08 | 6.03E-06 | 31  | 324  |
| GO:0005875 | microtubule associated complex                                           | 1.01E-07 | 6.15E-06 | 52  | 809  |
| GO:0031329 | regulation of cellular catabolic process                                 | 1.08E-07 | 6.54E-06 | 50  | 754  |
| GO:0043038 | amino acid activation                                                    | 1.12E-07 | 6.58E-06 | 26  | 267  |
| GO:0043039 | tRNA aminoacylation                                                      | 1.12E-07 | 6.58E-06 | 26  | 267  |
| GO:1903050 | regulation of proteolysis involved in cellular protein catabolic process | 1.13E-07 | 6.58E-06 | 31  | 326  |
| GO:1903362 | regulation of cellular protein catabolic process                         | 1.13E-07 | 6.58E-06 | 31  | 326  |
| GO:0004812 | aminoacyl-tRNA ligase activity                                           | 1.21E-07 | 6.82E-06 | 25  | 247  |
| GO:0000778 | condensed nuclear chromosome kinetochore                                 | 1.22E-07 | 6.82E-06 | 28  | 273  |
| GO:0000780 | condensed nuclear chromosome, centromeric region                         | 1.22E-07 | 6.82E-06 | 28  | 273  |
| GO:0000942 | condensed nuclear chromosome outer kinetochore                           | 1.22E-07 | 6.82E-06 | 28  | 273  |
| GO:0042729 | DASH complex                                                             | 1.22E-07 | 6.82E-06 | 28  | 273  |
| GO:0044085 | cellular component biogenesis                                            | 1.50E-07 | 8.33E-06 | 153 | 3402 |
| GO:0007010 | cytoskeleton organization                                                | 1.60E-07 | 8.81E-06 | 81  | 1424 |
| GO:0051129 | negative regulation of cellular component organization                   | 1.61E-07 | 8.83E-06 | 33  | 378  |
| GO:0042995 | cell projection                                                          | 1.66E-07 | 8.89E-06 | 57  | 900  |
| GO:0006418 | tRNA aminoacylation for protein translation                              | 1.73E-07 | 8.89E-06 | 25  | 252  |
| GO:0008608 | attachment of spindle microtubules to kinetochore                        | 1.77E-07 | 8.89E-06 | 23  | 198  |

|            |                                                                                   |          |          |     |      |
|------------|-----------------------------------------------------------------------------------|----------|----------|-----|------|
| GO:1901988 | negative regulation of cell cycle phase transition                                | 1.81E-07 | 8.89E-06 | 29  | 293  |
| GO:1901991 | negative regulation of mitotic cell cycle phase transition                        | 1.81E-07 | 8.89E-06 | 29  | 293  |
| GO:0032435 | negative regulation of proteasomal ubiquitin-dependent protein catabolic process  | 1.83E-07 | 8.89E-06 | 29  | 293  |
| GO:0042177 | negative regulation of protein catabolic process                                  | 1.83E-07 | 8.89E-06 | 29  | 293  |
| GO:1901799 | negative regulation of proteasomal protein catabolic process                      | 1.83E-07 | 8.89E-06 | 29  | 293  |
| GO:1903051 | negative regulation of proteolysis involved in cellular protein catabolic process | 1.83E-07 | 8.89E-06 | 29  | 293  |
| GO:1903363 | negative regulation of cellular protein catabolic process                         | 1.83E-07 | 8.89E-06 | 29  | 293  |
| GO:1901987 | regulation of cell cycle phase transition                                         | 1.87E-07 | 8.89E-06 | 31  | 334  |
| GO:1901990 | regulation of mitotic cell cycle phase transition                                 | 1.87E-07 | 8.89E-06 | 31  | 334  |
| GO:0007091 | metaphase/anaphase transition of mitotic cell cycle                               | 1.90E-07 | 8.89E-06 | 30  | 316  |
| GO:0010965 | regulation of mitotic sister chromatid separation                                 | 1.90E-07 | 8.89E-06 | 30  | 316  |
| GO:0030071 | regulation of mitotic metaphase/anaphase transition                               | 1.90E-07 | 8.89E-06 | 30  | 316  |
| GO:0033045 | regulation of sister chromatid segregation                                        | 1.90E-07 | 8.89E-06 | 30  | 316  |
| GO:0033047 | regulation of mitotic sister chromatid segregation                                | 1.90E-07 | 8.89E-06 | 30  | 316  |
| GO:0044784 | metaphase/anaphase transition of cell cycle                                       | 1.90E-07 | 8.89E-06 | 30  | 316  |
| GO:0051306 | mitotic sister chromatid separation                                               | 1.90E-07 | 8.89E-06 | 30  | 316  |
| GO:0051983 | regulation of chromosome segregation                                              | 1.90E-07 | 8.89E-06 | 30  | 316  |
| GO:1902099 | regulation of metaphase/anaphase transition of cell cycle                         | 1.90E-07 | 8.89E-06 | 30  | 316  |
| GO:0022607 | cellular component assembly                                                       | 1.90E-07 | 8.89E-06 | 123 | 2567 |
| GO:0051641 | cellular localization                                                             | 1.98E-07 | 9.21E-06 | 145 | 3012 |
| GO:0000940 | condensed chromosome outer kinetochore                                            | 2.00E-07 | 9.22E-06 | 31  | 336  |
| GO:0051348 | negative regulation of transferase activity                                       | 2.06E-07 | 9.43E-06 | 29  | 298  |
| GO:0009895 | negative regulation of catabolic process                                          | 2.08E-07 | 9.43E-06 | 29  | 295  |
| GO:0031330 | negative regulation of cellular catabolic process                                 | 2.08E-07 | 9.43E-06 | 29  | 295  |
| GO:0051304 | chromosome separation                                                             | 2.39E-07 | 1.08E-05 | 30  | 320  |
| GO:0005819 | spindle                                                                           | 2.60E-07 | 1.16E-05 | 38  | 465  |
| GO:0010948 | negative regulation of cell cycle process                                         | 2.64E-07 | 1.17E-05 | 29  | 300  |
| GO:0034453 | microtubule anchoring                                                             | 2.82E-07 | 1.24E-05 | 23  | 204  |
| GO:0030554 | adenyl nucleotide binding                                                         | 3.01E-07 | 1.32E-05 | 186 | 4203 |
| GO:0033044 | regulation of chromosome organization                                             | 3.08E-07 | 1.34E-05 | 30  | 323  |
| GO:0007088 | regulation of mitotic nuclear division                                            | 3.09E-07 | 1.34E-05 | 30  | 323  |
| GO:0000070 | mitotic sister chromatid segregation                                              | 3.14E-07 | 1.34E-05 | 30  | 324  |

|            |                                                                                                |          |          |    |     |
|------------|------------------------------------------------------------------------------------------------|----------|----------|----|-----|
| GO:0000819 | sister chromatid segregation                                                                   | 3.14E-07 | 1.34E-05 | 30 | 324 |
| GO:0031145 | anaphase-promoting complex-dependent proteasomal ubiquitin-dependent protein catabolic process | 3.25E-07 | 1.38E-05 | 30 | 323 |
| GO:0051783 | regulation of nuclear division                                                                 | 3.36E-07 | 1.42E-05 | 30 | 325 |
| GO:0009894 | regulation of catabolic process                                                                | 3.38E-07 | 1.42E-05 | 50 | 773 |
| GO:0007094 | mitotic spindle assembly checkpoint                                                            | 3.74E-07 | 1.43E-05 | 28 | 286 |
| GO:0031577 | spindle checkpoint                                                                             | 3.74E-07 | 1.43E-05 | 28 | 286 |
| GO:0033046 | negative regulation of sister chromatid segregation                                            | 3.74E-07 | 1.43E-05 | 28 | 286 |
| GO:0033048 | negative regulation of mitotic sister chromatid segregation                                    | 3.74E-07 | 1.43E-05 | 28 | 286 |
| GO:0045839 | negative regulation of mitotic nuclear division                                                | 3.74E-07 | 1.43E-05 | 28 | 286 |
| GO:0045841 | negative regulation of mitotic metaphase/anaphase transition                                   | 3.74E-07 | 1.43E-05 | 28 | 286 |
| GO:0051352 | negative regulation of ligase activity                                                         | 3.74E-07 | 1.43E-05 | 28 | 286 |
| GO:0051436 | negative regulation of ubiquitin-protein ligase activity involved in mitotic cell cycle        | 3.74E-07 | 1.43E-05 | 28 | 286 |
| GO:0051444 | negative regulation of ubiquitin-protein transferase activity                                  | 3.74E-07 | 1.43E-05 | 28 | 286 |
| GO:0051985 | negative regulation of chromosome segregation                                                  | 3.74E-07 | 1.43E-05 | 28 | 286 |
| GO:0071173 | spindle assembly checkpoint                                                                    | 3.74E-07 | 1.43E-05 | 28 | 286 |
| GO:0071174 | mitotic spindle checkpoint                                                                     | 3.74E-07 | 1.43E-05 | 28 | 286 |
| GO:1902100 | negative regulation of metaphase/anaphase transition of cell cycle                             | 3.74E-07 | 1.43E-05 | 28 | 286 |
| GO:1904667 | negative regulation of ubiquitin protein ligase activity                                       | 3.74E-07 | 1.43E-05 | 28 | 286 |
| GO:2000816 | negative regulation of mitotic sister chromatid separation                                     | 3.74E-07 | 1.43E-05 | 28 | 286 |
| GO:2001251 | negative regulation of chromosome organization                                                 | 3.74E-07 | 1.43E-05 | 28 | 286 |
| GO:0042176 | regulation of protein catabolic process                                                        | 3.96E-07 | 1.51E-05 | 31 | 345 |
| GO:0031397 | negative regulation of protein ubiquitination                                                  | 4.02E-07 | 1.52E-05 | 28 | 287 |
| GO:1903321 | negative regulation of protein modification by small protein conjugation or removal            | 4.02E-07 | 1.52E-05 | 28 | 287 |
| GO:0051784 | negative regulation of nuclear division                                                        | 4.09E-07 | 1.53E-05 | 28 | 288 |
| GO:0051782 | negative regulation of cell division                                                           | 4.25E-07 | 1.58E-05 | 28 | 289 |
| GO:0033043 | regulation of organelle organization                                                           | 4.29E-07 | 1.59E-05 | 40 | 540 |
| GO:0051439 | regulation of ubiquitin-protein ligase activity involved in mitotic cell cycle                 | 5.23E-07 | 1.92E-05 | 28 | 291 |
| GO:1904666 | regulation of ubiquitin protein ligase activity                                                | 5.23E-07 | 1.92E-05 | 28 | 291 |
| GO:0007093 | mitotic cell cycle checkpoint                                                                  | 5.33E-07 | 1.95E-05 | 29 | 312 |
| GO:0016874 | ligase activity                                                                                | 5.36E-07 | 1.95E-05 | 45 | 668 |
| GO:0051340 | regulation of ligase activity                                                                  | 6.00E-07 | 2.16E-05 | 28 | 293 |
| GO:0051438 | regulation of ubiquitin-protein transferase activity                                           | 6.00E-07 | 2.16E-05 | 28 | 293 |

|            |                                                                               |          |          |     |       |
|------------|-------------------------------------------------------------------------------|----------|----------|-----|-------|
| GO:0005622 | intracellular                                                                 | 6.14E-07 | 2.20E-05 | 535 | 15206 |
| GO:0050662 | coenzyme binding                                                              | 6.41E-07 | 2.27E-05 | 49  | 806   |
| GO:0031396 | regulation of protein ubiquitination                                          | 6.43E-07 | 2.27E-05 | 28  | 294   |
| GO:1903320 | regulation of protein modification by small protein conjugation or removal    | 6.43E-07 | 2.27E-05 | 28  | 294   |
| GO:0044770 | cell cycle phase transition                                                   | 6.70E-07 | 2.34E-05 | 31  | 358   |
| GO:0044772 | mitotic cell cycle phase transition                                           | 6.70E-07 | 2.34E-05 | 31  | 358   |
| GO:0000777 | condensed chromosome kinetochore                                              | 6.84E-07 | 2.36E-05 | 31  | 355   |
| GO:0000779 | condensed chromosome, centromeric region                                      | 6.84E-07 | 2.36E-05 | 31  | 355   |
| GO:0000794 | condensed nuclear chromosome                                                  | 6.96E-07 | 2.39E-05 | 29  | 330   |
| GO:0005524 | ATP binding                                                                   | 7.03E-07 | 2.39E-05 | 183 | 4129  |
| GO:0016192 | vesicle-mediated transport                                                    | 7.03E-07 | 2.39E-05 | 89  | 1506  |
| GO:0044763 | single-organism cellular process                                              | 7.13E-07 | 2.42E-05 | 570 | 16473 |
| GO:0032559 | adenyl ribonucleotide binding                                                 | 7.53E-07 | 2.54E-05 | 183 | 4135  |
| GO:0045930 | negative regulation of mitotic cell cycle                                     | 8.30E-07 | 2.78E-05 | 29  | 319   |
| GO:0006886 | intracellular protein transport                                               | 8.70E-07 | 2.91E-05 | 110 | 2177  |
| GO:0010564 | regulation of cell cycle process                                              | 8.84E-07 | 2.94E-05 | 32  | 388   |
| GO:0001071 | nucleic acid binding transcription factor activity                            | 9.03E-07 | 2.97E-05 | 92  | 1824  |
| GO:0003700 | transcription factor activity, sequence-specific DNA binding                  | 9.03E-07 | 2.97E-05 | 92  | 1824  |
| GO:0044707 | single-multicellular organism process                                         | 9.06E-07 | 2.97E-05 | 106 | 2159  |
| GO:0031400 | negative regulation of protein modification process                           | 9.46E-07 | 3.09E-05 | 29  | 317   |
| GO:0009058 | biosynthetic process                                                          | 9.80E-07 | 3.18E-05 | 364 | 9886  |
| GO:0051302 | regulation of cell division                                                   | 1.13E-06 | 3.66E-05 | 31  | 374   |
| GO:0010498 | proteasomal protein catabolic process                                         | 1.24E-06 | 3.96E-05 | 33  | 404   |
| GO:0043161 | proteasome-mediated ubiquitin-dependent protein catabolic process             | 1.24E-06 | 3.96E-05 | 33  | 404   |
| GO:0030334 | regulation of cell migration                                                  | 1.74E-06 | 5.54E-05 | 21  | 174   |
| GO:0003779 | actin binding                                                                 | 1.92E-06 | 6.10E-05 | 43  | 596   |
| GO:0045861 | negative regulation of proteolysis                                            | 1.95E-06 | 6.16E-05 | 30  | 351   |
| GO:0000776 | kinetochore                                                                   | 1.99E-06 | 6.27E-05 | 36  | 487   |
| GO:1901576 | organic substance biosynthetic process                                        | 2.03E-06 | 6.31E-05 | 354 | 9629  |
| GO:0051270 | regulation of cellular component movement                                     | 2.03E-06 | 6.31E-05 | 21  | 177   |
| GO:2000145 | regulation of cell motility                                                   | 2.03E-06 | 6.31E-05 | 21  | 177   |
| GO:0016491 | oxidoreductase activity                                                       | 2.11E-06 | 6.51E-05 | 131 | 3136  |
| GO:0005667 | transcription factor complex                                                  | 2.12E-06 | 6.51E-05 | 121 | 2661  |
| GO:0009790 | embryo development                                                            | 2.16E-06 | 6.61E-05 | 29  | 324   |
| GO:0015630 | microtubule cytoskeleton                                                      | 2.39E-06 | 7.27E-05 | 74  | 1396  |
| GO:0006559 | L-phenylalanine catabolic process                                             | 2.55E-06 | 7.72E-05 | 4   | 5     |
| GO:1902222 | erythrose 4-phosphate/phosphoenolpyruvate family amino acid catabolic process | 2.55E-06 | 7.72E-05 | 4   | 5     |
| GO:0008565 | protein transporter activity                                                  | 2.69E-06 | 8.10E-05 | 36  | 433   |
| GO:0040012 | regulation of locomotion                                                      | 2.76E-06 | 8.28E-05 | 21  | 181   |
| GO:0007346 | regulation of mitotic cell cycle                                              | 2.82E-06 | 8.42E-05 | 31  | 392   |
| GO:0003824 | catalytic activity                                                            | 2.88E-06 | 8.54E-05 | 627 | 18458 |
| GO:0015031 | protein transport                                                             | 3.53E-06 | 0.000105 | 125 | 2645  |
| GO:0030162 | regulation of proteolysis                                                     | 3.58E-06 | 0.000105 | 32  | 408   |
| GO:0005623 | cell                                                                          | 3.70E-06 | 0.000108 | 563 | 16218 |

|            |                                                           |          |          |     |       |
|------------|-----------------------------------------------------------|----------|----------|-----|-------|
| GO:0044464 | cell part                                                 | 3.70E-06 | 0.000108 | 563 | 16218 |
| GO:0043086 | negative regulation of catalytic activity                 | 3.88E-06 | 0.000113 | 30  | 367   |
| GO:0045184 | establishment of protein localization                     | 4.18E-06 | 0.000121 | 126 | 2682  |
| GO:0000226 | microtubule cytoskeleton organization                     | 4.37E-06 | 0.000126 | 44  | 649   |
| GO:0032269 | negative regulation of cellular protein metabolic process | 4.91E-06 | 0.000141 | 32  | 408   |
| GO:0051248 | negative regulation of protein metabolic process          | 4.91E-06 | 0.000141 | 32  | 408   |
| GO:0055114 | oxidation-reduction process                               | 5.01E-06 | 0.000143 | 133 | 3215  |
| GO:0044424 | intracellular part                                        | 5.14E-06 | 0.000146 | 509 | 14542 |
| GO:0043234 | protein complex                                           | 5.43E-06 | 0.000154 | 345 | 9192  |
| GO:0044092 | negative regulation of molecular function                 | 5.84E-06 | 0.000164 | 30  | 379   |
| GO:0032501 | multicellular organismal process                          | 6.17E-06 | 0.000173 | 109 | 2308  |
| GO:0000075 | cell cycle checkpoint                                     | 6.29E-06 | 0.000176 | 31  | 401   |
| GO:0006520 | cellular amino acid metabolic process                     | 6.77E-06 | 0.000188 | 108 | 2337  |
| GO:0016477 | cell migration                                            | 7.62E-06 | 0.000211 | 24  | 248   |
| GO:0032879 | regulation of localization                                | 7.90E-06 | 0.000218 | 28  | 316   |
| GO:0034613 | cellular protein localization                             | 1.07E-05 | 0.000293 | 113 | 2369  |
| GO:0044454 | nuclear chromosome part                                   | 1.08E-05 | 0.000295 | 29  | 377   |
| GO:0044712 | single-organism catabolic process                         | 1.11E-05 | 0.000304 | 70  | 1325  |
| GO:0070727 | cellular macromolecule localization                       | 1.12E-05 | 0.000304 | 113 | 2371  |
| GO:0045786 | negative regulation of cell cycle                         | 1.15E-05 | 0.00031  | 30  | 392   |
| GO:0044249 | cellular biosynthetic process                             | 1.18E-05 | 0.000318 | 334 | 9143  |
| GO:0000793 | condensed chromosome                                      | 1.23E-05 | 0.000332 | 32  | 438   |
| GO:0034660 | ncRNA metabolic process                                   | 1.26E-05 | 0.000336 | 53  | 944   |
| GO:1901363 | heterocyclic compound binding                             | 1.34E-05 | 0.000356 | 477 | 13561 |
| GO:0097159 | organic cyclic compound binding                           | 1.39E-05 | 0.000368 | 477 | 13566 |
| GO:0050793 | regulation of developmental process                       | 1.44E-05 | 0.000381 | 28  | 335   |
| GO:0051338 | regulation of transferase activity                        | 1.46E-05 | 0.000386 | 33  | 466   |
| GO:2000026 | regulation of multicellular organismal development        | 1.51E-05 | 0.000395 | 24  | 259   |
| GO:0005816 | spindle pole body                                         | 1.60E-05 | 0.000418 | 13  | 86    |
| GO:0005823 | central plaque of spindle pole body                       | 1.60E-05 | 0.000418 | 13  | 86    |
| GO:0006091 | generation of precursor metabolites and energy            | 1.97E-05 | 0.000512 | 60  | 1181  |
| GO:0044444 | cytoplasmic part                                          | 2.04E-05 | 0.000527 | 210 | 5293  |
| GO:0019031 | viral envelope                                            | 2.29E-05 | 0.000589 | 49  | 859   |
| GO:0036338 | viral membrane                                            | 2.29E-05 | 0.000589 | 49  | 859   |
| GO:0051259 | protein oligomerization                                   | 2.40E-05 | 0.000614 | 31  | 401   |
| GO:0044281 | small molecule metabolic process                          | 2.46E-05 | 0.000628 | 226 | 5774  |
| GO:0008104 | protein localization                                      | 2.54E-05 | 0.000645 | 128 | 2836  |
| GO:0000775 | chromosome, centromeric region                            | 2.58E-05 | 0.000654 | 39  | 610   |
| GO:0000228 | nuclear chromosome                                        | 2.61E-05 | 0.000658 | 29  | 398   |
| GO:0051607 | defense response to virus                                 | 2.71E-05 | 0.000681 | 22  | 289   |
| GO:0006399 | tRNA metabolic process                                    | 2.89E-05 | 0.000723 | 45  | 782   |
| GO:0006733 | oxidoreduction coenzyme metabolic process                 | 3.20E-05 | 0.0008   | 41  | 724   |
| GO:0051239 | regulation of multicellular organismal process            | 3.44E-05 | 0.000855 | 26  | 321   |
| GO:0009615 | response to virus                                         | 3.51E-05 | 0.000871 | 24  | 333   |
| GO:0002252 | immune effector process                                   | 4.00E-05 | 0.000989 | 22  | 298   |

|            |                                                            |          |          |     |       |
|------------|------------------------------------------------------------|----------|----------|-----|-------|
| GO:1901566 | organonitrogen compound biosynthetic process               | 4.08E-05 | 0.001004 | 118 | 2722  |
| GO:0006694 | steroid biosynthetic process                               | 4.55E-05 | 0.001117 | 13  | 124   |
| GO:0098687 | chromosomal region                                         | 4.58E-05 | 0.00112  | 39  | 627   |
| GO:0007049 | cell cycle                                                 | 4.81E-05 | 0.001172 | 89  | 1964  |
| GO:0046983 | protein dimerization activity                              | 5.13E-05 | 0.001245 | 57  | 1105  |
| GO:0006914 | autophagy                                                  | 5.49E-05 | 0.001327 | 62  | 1208  |
| GO:0006810 | transport                                                  | 5.65E-05 | 0.001361 | 286 | 7641  |
| GO:0004411 | homogentisate 1,2-dioxygenase activity                     | 6.05E-05 | 0.001453 | 3   | 4     |
| GO:0051726 | regulation of cell cycle                                   | 6.59E-05 | 0.001577 | 35  | 565   |
| GO:0008610 | lipid biosynthetic process                                 | 7.35E-05 | 0.001753 | 38  | 674   |
| GO:0044450 | microtubule organizing center part                         | 7.74E-05 | 0.00184  | 13  | 100   |
| GO:0032991 | macromolecular complex                                     | 8.16E-05 | 0.001934 | 368 | 10211 |
| GO:0006511 | ubiquitin-dependent protein catabolic process              | 8.37E-05 | 0.001972 | 40  | 643   |
| GO:0008924 | malate dehydrogenase (quinone) activity                    | 8.40E-05 | 0.001972 | 4   | 10    |
| GO:0051234 | establishment of localization                              | 8.41E-05 | 0.001972 | 286 | 7682  |
| GO:0044257 | cellular protein catabolic process                         | 8.59E-05 | 0.002001 | 41  | 670   |
| GO:0051603 | proteolysis involved in cellular protein catabolic process | 8.59E-05 | 0.002001 | 41  | 670   |
| GO:0044710 | single-organism metabolic process                          | 8.71E-05 | 0.002023 | 370 | 10538 |
| GO:0043229 | intracellular organelle                                    | 8.96E-05 | 0.002074 | 396 | 11184 |
| GO:0000287 | magnesium ion binding                                      | 9.02E-05 | 0.002082 | 26  | 379   |
| GO:0005741 | mitochondrial outer membrane                               | 0.00011  | 0.002415 | 19  | 240   |
| GO:0019941 | modification-dependent protein catabolic process           | 0.00011  | 0.002471 | 40  | 651   |
| GO:0043632 | modification-dependent macromolecule catabolic process     | 0.00011  | 0.002471 | 40  | 651   |
| GO:0031968 | organelle outer membrane                                   | 0.00012  | 0.002631 | 19  | 242   |
| GO:0050660 | flavin adenine dinucleotide binding                        | 0.00012  | 0.002815 | 20  | 274   |
| GO:0042262 | DNA protection                                             | 0.00013  | 0.002953 | 8   | 61    |
| GO:0000922 | spindle pole                                               | 0.00014  | 0.003102 | 14  | 125   |
| GO:0006412 | translation                                                | 0.00014  | 0.003136 | 56  | 1128  |
| GO:0016614 | oxidoreductase activity, acting on CH-OH group of donors   | 0.00015  | 0.003257 | 24  | 376   |
| GO:0044283 | small molecule biosynthetic process                        | 0.00015  | 0.003293 | 57  | 1155  |
| GO:0043226 | organelle                                                  | 0.00016  | 0.003579 | 398 | 11329 |
| GO:0033036 | macromolecule localization                                 | 0.00017  | 0.003861 | 137 | 3220  |
| GO:0032268 | regulation of cellular protein metabolic process           | 0.00018  | 0.003874 | 54  | 1033  |
| GO:0051179 | localization                                               | 0.00018  | 0.00392  | 298 | 8123  |
| GO:0005200 | structural constituent of cytoskeleton                     | 0.00018  | 0.00403  | 13  | 111   |
| GO:0031399 | regulation of protein modification process                 | 0.00019  | 0.004055 | 33  | 530   |
| GO:0061061 | muscle structure development                               | 0.00019  | 0.004081 | 10  | 77    |
| GO:0009074 | aromatic amino acid family catabolic process               | 0.0002   | 0.004299 | 5   | 18    |
| GO:0072524 | pyridine-containing compound metabolic process             | 0.0002   | 0.004325 | 33  | 573   |
| GO:0030163 | protein catabolic process                                  | 0.0002   | 0.004377 | 41  | 697   |
| GO:0019362 | pyridine nucleotide metabolic process                      | 0.00021  | 0.004456 | 32  | 550   |
| GO:0043603 | cellular amide metabolic process                           | 0.00022  | 0.00473  | 74  | 1613  |



|            |                                                                                                             |         |          |     |      |
|------------|-------------------------------------------------------------------------------------------------------------|---------|----------|-----|------|
| GO:0005801 | cis-Golgi network                                                                                           | 0.00023 | 0.004869 | 17  | 209  |
| GO:0006518 | peptide metabolic process                                                                                   | 0.00025 | 0.005243 | 59  | 1241 |
| GO:0016901 | oxidoreductase activity, acting on the<br>CH-OH group of donors, quinone or<br>similar compound as acceptor | 0.00025 | 0.005306 | 4   | 12   |
| GO:0007067 | mitotic nuclear division                                                                                    | 0.00026 | 0.005537 | 34  | 556  |
| GO:0016053 | organic acid biosynthetic process                                                                           | 0.00027 | 0.00564  | 44  | 832  |
| GO:0046394 | carboxylic acid biosynthetic process                                                                        | 0.00027 | 0.00564  | 44  | 832  |
| GO:0051246 | regulation of protein metabolic process                                                                     | 0.00028 | 0.005852 | 54  | 1052 |
| GO:0022402 | cell cycle process                                                                                          | 0.00028 | 0.005899 | 68  | 1435 |
| GO:0008202 | steroid metabolic process                                                                                   | 0.00029 | 0.006077 | 13  | 146  |
| GO:0009605 | response to external stimulus                                                                               | 0.00032 | 0.006595 | 43  | 855  |
| GO:0042438 | melanin biosynthetic process                                                                                | 0.00032 | 0.006595 | 5   | 19   |
| GO:0046189 | phenol-containing compound<br>biosynthetic process                                                          | 0.00032 | 0.006595 | 5   | 19   |
| GO:1901605 | alpha-amino acid metabolic process                                                                          | 0.00033 | 0.006897 | 92  | 2112 |
| GO:0032403 | protein complex binding                                                                                     | 0.00034 | 0.006963 | 44  | 791  |
| GO:0006558 | L-phenylalanine metabolic process                                                                           | 0.00034 | 0.007021 | 14  | 165  |
| GO:1902221 | erythrose 4-<br>phosphate/phosphoenolpyruvate family<br>amino acid metabolic process                        | 0.00034 | 0.007021 | 14  | 165  |
| GO:0043043 | peptide biosynthetic process                                                                                | 0.00035 | 0.007172 | 56  | 1171 |
| GO:1901564 | organonitrogen compound metabolic<br>process                                                                | 0.00035 | 0.007172 | 249 | 6717 |
| GO:0007017 | microtubule-based process                                                                                   | 0.00036 | 0.007302 | 46  | 836  |
| GO:0006099 | tricarboxylic acid cycle                                                                                    | 0.00038 | 0.007666 | 13  | 141  |
| GO:0006101 | citrate metabolic process                                                                                   | 0.00038 | 0.007666 | 13  | 141  |
| GO:0008855 | exodeoxyribonuclease VII activity                                                                           | 0.00039 | 0.007871 | 29  | 466  |
| GO:0009318 | exodeoxyribonuclease VII complex                                                                            | 0.00039 | 0.007871 | 29  | 466  |
| GO:0051128 | regulation of cellular component<br>organization                                                            | 0.00039 | 0.007871 | 41  | 773  |
| GO:0072350 | tricarboxylic acid metabolic process                                                                        | 0.00041 | 0.008157 | 13  | 142  |
| GO:0004529 | exodeoxyribonuclease activity                                                                               | 0.00041 | 0.008157 | 29  | 468  |
| GO:0016895 | exodeoxyribonuclease activity,<br>producing 5'-phosphomonoesters                                            | 0.00041 | 0.008157 | 29  | 468  |
| GO:0016787 | hydrolase activity                                                                                          | 0.00043 | 0.008539 | 313 | 8525 |
| GO:0008537 | proteasome activator complex                                                                                | 0.00044 | 0.008585 | 7   | 40   |
| GO:0006090 | pyruvate metabolic process                                                                                  | 0.00044 | 0.008599 | 31  | 556  |
| GO:0010830 | regulation of myotube differentiation                                                                       | 0.00047 | 0.009135 | 3   | 5    |
| GO:0051147 | regulation of muscle cell differentiation                                                                   | 0.00047 | 0.009135 | 3   | 5    |
| GO:0051153 | regulation of striated muscle cell<br>differentiation                                                       | 0.00047 | 0.009135 | 3   | 5    |
| GO:0000280 | nuclear division                                                                                            | 0.00048 | 0.009263 | 36  | 632  |
| GO:0005740 | mitochondrial envelope                                                                                      | 0.00048 | 0.009282 | 36  | 659  |
| GO:0005576 | extracellular region                                                                                        | 0.00049 | 0.009476 | 145 | 3600 |
| GO:0005815 | microtubule organizing center                                                                               | 0.00051 | 0.009729 | 23  | 322  |
| GO:0032787 | monocarboxylic acid metabolic process                                                                       | 0.00051 | 0.009824 | 50  | 1028 |
| GO:0005850 | eukaryotic translation initiation factor 2<br>complex                                                       | 0.00052 | 0.009989 | 6   | 31   |
| GO:0072509 | divalent inorganic cation<br>transmembrane transporter activity                                             | 0.00053 | 0.010059 | 26  | 409  |
| GO:1902589 | single-organism organelle organization                                                                      | 0.00053 | 0.010063 | 82  | 1839 |
| GO:0048856 | anatomical structure development                                                                            | 0.00056 | 0.010696 | 58  | 1180 |

|            |                                                        |         |          |     |      |
|------------|--------------------------------------------------------|---------|----------|-----|------|
| GO:0071840 | cellular component organization or biogenesis          | 0.00058 | 0.010912 | 205 | 5478 |
| GO:0031975 | envelope                                               | 0.00066 | 0.012418 | 43  | 837  |
| GO:0022892 | substrate-specific transporter activity                | 0.00066 | 0.012418 | 113 | 2760 |
| GO:0043604 | amide biosynthetic process                             | 0.00071 | 0.013399 | 65  | 1428 |
| GO:0048285 | organelle fission                                      | 0.00073 | 0.01362  | 36  | 645  |
| GO:0000746 | conjugation                                            | 0.00075 | 0.013969 | 9   | 91   |
| GO:0031967 | organelle envelope                                     | 0.00075 | 0.013988 | 41  | 791  |
| GO:0009060 | aerobic respiration                                    | 0.00076 | 0.014047 | 13  | 153  |
| GO:0014902 | myotube differentiation                                | 0.00082 | 0.015185 | 3   | 6    |
| GO:0044248 | cellular catabolic process                             | 0.00083 | 0.015345 | 114 | 2758 |
| GO:0016043 | cellular component organization                        | 0.00084 | 0.015524 | 179 | 4708 |
| GO:0051287 | NAD binding                                            | 0.00089 | 0.016313 | 18  | 270  |
| GO:0044429 | mitochondrial part                                     | 0.00089 | 0.016335 | 39  | 761  |
| GO:0071702 | organic substance transport                            | 0.00092 | 0.016731 | 140 | 3512 |
| GO:0010508 | positive regulation of autophagy                       | 0.00092 | 0.016838 | 24  | 405  |
| GO:0004448 | isocitrate dehydrogenase activity                      | 0.00093 | 0.016899 | 4   | 22   |
| GO:0031324 | negative regulation of cellular metabolic process      | 0.00093 | 0.016899 | 33  | 582  |
| GO:0019829 | cation-transporting ATPase activity                    | 0.00097 | 0.017502 | 13  | 164  |
| GO:0031023 | microtubule organizing center organization             | 0.00098 | 0.017707 | 17  | 213  |
| GO:0008299 | isoprenoid biosynthetic process                        | 0.00099 | 0.017736 | 13  | 164  |
| GO:0016114 | terpenoid biosynthetic process                         | 0.00099 | 0.017766 | 12  | 141  |
| GO:0009085 | lysine biosynthetic process                            | 0.00099 | 0.017767 | 5   | 31   |
| GO:0010605 | negative regulation of macromolecule metabolic process | 0.00101 | 0.01802  | 34  | 609  |
| GO:0044877 | macromolecular complex binding                         | 0.00103 | 0.018358 | 52  | 1033 |
| GO:0005739 | mitochondrion                                          | 0.00104 | 0.018478 | 47  | 995  |
| GO:0030199 | collagen fibril organization                           | 0.00104 | 0.018478 | 4   | 17   |
| GO:1901607 | alpha-amino acid biosynthetic process                  | 0.00106 | 0.018704 | 28  | 486  |
| GO:0022624 | proteasome accessory complex                           | 0.00106 | 0.018762 | 7   | 47   |
| GO:0006582 | melanin metabolic process                              | 0.00109 | 0.019074 | 5   | 25   |
| GO:0051276 | chromosome organization                                | 0.00113 | 0.019802 | 54  | 1148 |
| GO:0051301 | cell division                                          | 0.00117 | 0.020395 | 44  | 876  |
| GO:0070838 | divalent metal ion transport                           | 0.00121 | 0.021064 | 30  | 504  |
| GO:0009896 | positive regulation of catabolic process               | 0.00122 | 0.02121  | 24  | 413  |
| GO:0031331 | positive regulation of cellular catabolic process      | 0.00122 | 0.02121  | 24  | 413  |
| GO:0044265 | cellular macromolecule catabolic process               | 0.00122 | 0.02121  | 61  | 1314 |
| GO:0009892 | negative regulation of metabolic process               | 0.00123 | 0.02123  | 34  | 617  |
| GO:0030522 | intracellular receptor signaling pathway               | 0.00126 | 0.021752 | 6   | 37   |
| GO:0044271 | cellular nitrogen compound biosynthetic process        | 0.00131 | 0.022531 | 252 | 7095 |
| GO:0031076 | embryonic camera-type eye development                  | 0.00132 | 0.022531 | 3   | 10   |
| GO:0048048 | embryonic eye morphogenesis                            | 0.00132 | 0.022531 | 3   | 10   |
| GO:0048596 | embryonic camera-type eye morphogenesis                | 0.00132 | 0.022531 | 3   | 10   |
| GO:0006721 | terpenoid metabolic process                            | 0.00133 | 0.022531 | 12  | 147  |

|            |                                                                                                             |         |          |     |      |
|------------|-------------------------------------------------------------------------------------------------------------|---------|----------|-----|------|
| GO:0016616 | oxidoreductase activity, acting on the CH-OH group of donors, NAD or NADP as acceptor                       | 0.00133 | 0.022531 | 20  | 343  |
| GO:0098542 | defense response to other organism                                                                          | 0.00135 | 0.02292  | 26  | 474  |
| GO:0009056 | catabolic process                                                                                           | 0.00138 | 0.023238 | 134 | 3422 |
| GO:0031966 | mitochondrial membrane                                                                                      | 0.00138 | 0.023238 | 33  | 628  |
| GO:1901362 | organic cyclic compound biosynthetic process                                                                | 0.00139 | 0.023371 | 225 | 6232 |
| GO:0006996 | organelle organization                                                                                      | 0.0014  | 0.023556 | 118 | 2918 |
| GO:0006081 | cellular aldehyde metabolic process                                                                         | 0.00141 | 0.023675 | 23  | 398  |
| GO:0015631 | tubulin binding                                                                                             | 0.00143 | 0.023947 | 33  | 579  |
| GO:1901617 | organic hydroxy compound biosynthetic process                                                               | 0.00145 | 0.024218 | 8   | 72   |
| GO:0004506 | squalene monooxygenase activity                                                                             | 0.00149 | 0.024595 | 4   | 19   |
| GO:0015988 | energy coupled proton transmembrane transport, against electrochemical gradient                             | 0.00149 | 0.024595 | 24  | 410  |
| GO:0015991 | ATP hydrolysis coupled proton transport                                                                     | 0.00149 | 0.024595 | 24  | 410  |
| GO:0006732 | coenzyme metabolic process                                                                                  | 0.00152 | 0.025032 | 54  | 1202 |
| GO:0008442 | 3-hydroxyisobutyrate dehydrogenase activity                                                                 | 0.00155 | 0.025444 | 4   | 17   |
| GO:0005093 | Rab GDP-dissociation inhibitor activity                                                                     | 0.00161 | 0.026515 | 3   | 9    |
| GO:0030976 | thiamine pyrophosphate binding                                                                              | 0.00162 | 0.026551 | 9   | 81   |
| GO:0046497 | nicotinate nucleotide metabolic process                                                                     | 0.00168 | 0.027465 | 6   | 40   |
| GO:0046496 | nicotinamide nucleotide metabolic process                                                                   | 0.00168 | 0.027465 | 28  | 527  |
| GO:0015093 | ferrous iron transmembrane transporter activity                                                             | 0.00176 | 0.028419 | 15  | 202  |
| GO:0015684 | ferrous iron transport                                                                                      | 0.00176 | 0.028419 | 15  | 202  |
| GO:0043207 | response to external biotic stimulus                                                                        | 0.00176 | 0.028419 | 28  | 531  |
| GO:0051707 | response to other organism                                                                                  | 0.00176 | 0.028419 | 28  | 531  |
| GO:0004749 | ribose phosphate diphosphokinase activity                                                                   | 0.00178 | 0.028758 | 3   | 12   |
| GO:0016796 | exonuclease activity, active with either ribo- or deoxyribonucleic acids and producing 5'-phosphomonoesters | 0.00179 | 0.028782 | 30  | 538  |
| GO:0046933 | proton-transporting ATP synthase activity, rotational mechanism                                             | 0.00179 | 0.028782 | 7   | 67   |
| GO:0090407 | organophosphate biosynthetic process                                                                        | 0.00181 | 0.028835 | 36  | 721  |
| GO:0008652 | cellular amino acid biosynthetic process                                                                    | 0.00181 | 0.028835 | 28  | 509  |
| GO:0045298 | tubulin complex                                                                                             | 0.00181 | 0.028835 | 33  | 590  |
| GO:0044550 | secondary metabolite biosynthetic process                                                                   | 0.00181 | 0.028835 | 6   | 44   |
| GO:0008184 | glycogen phosphorylase activity                                                                             | 0.00182 | 0.028842 | 8   | 65   |
| GO:0098799 | outer mitochondrial membrane protein complex                                                                | 0.00187 | 0.029291 | 8   | 80   |
| GO:0004883 | glucocorticoid receptor activity                                                                            | 0.00188 | 0.029291 | 4   | 14   |
| GO:0031958 | corticosteroid receptor signaling pathway                                                                   | 0.00188 | 0.029291 | 4   | 14   |
| GO:0031960 | response to corticosteroid                                                                                  | 0.00188 | 0.029291 | 4   | 14   |

|            |                                                                                         |         |          |     |      |
|------------|-----------------------------------------------------------------------------------------|---------|----------|-----|------|
| GO:0042921 | glucocorticoid receptor signaling pathway                                               | 0.00188 | 0.029291 | 4   | 14   |
| GO:0043402 | glucocorticoid mediated signaling pathway                                               | 0.00188 | 0.029291 | 4   | 14   |
| GO:0051384 | response to glucocorticoid                                                              | 0.00188 | 0.029291 | 4   | 14   |
| GO:0071384 | cellular response to corticosteroid stimulus                                            | 0.00188 | 0.029291 | 4   | 14   |
| GO:0071385 | cellular response to glucocorticoid stimulus                                            | 0.00188 | 0.029291 | 4   | 14   |
| GO:0004645 | phosphorylase activity                                                                  | 0.00193 | 0.029865 | 8   | 66   |
| GO:0015075 | ion transmembrane transporter activity                                                  | 0.00193 | 0.029865 | 88  | 2140 |
| GO:0009165 | nucleotide biosynthetic process                                                         | 0.00202 | 0.031149 | 25  | 453  |
| GO:1901293 | nucleoside phosphate biosynthetic process                                               | 0.00202 | 0.031149 | 25  | 453  |
| GO:0016701 | oxidoreductase activity, acting on single donors with incorporation of molecular oxygen | 0.00209 | 0.032159 | 11  | 124  |
| GO:0016778 | diphosphotransferase activity                                                           | 0.0021  | 0.032168 | 3   | 13   |
| GO:0016887 | ATPase activity                                                                         | 0.00212 | 0.032406 | 47  | 968  |
| GO:0015980 | energy derivation by oxidation of organic compounds                                     | 0.00213 | 0.032525 | 28  | 547  |
| GO:0006720 | isoprenoid metabolic process                                                            | 0.00214 | 0.032677 | 13  | 180  |
| GO:0033179 | proton-transporting V-type ATPase, V0 domain                                            | 0.00215 | 0.032743 | 18  | 277  |
| GO:0030474 | spindle pole body duplication                                                           | 0.00219 | 0.033212 | 13  | 146  |
| GO:0051300 | spindle pole body organization                                                          | 0.00219 | 0.033212 | 13  | 146  |
| GO:0003707 | steroid hormone receptor activity                                                       | 0.0022  | 0.033317 | 6   | 42   |
| GO:0019867 | outer membrane                                                                          | 0.00221 | 0.033332 | 27  | 502  |
| GO:0071944 | cell periphery                                                                          | 0.0023  | 0.034582 | 86  | 1977 |
| GO:1903047 | mitotic cell cycle process                                                              | 0.0023  | 0.034582 | 44  | 905  |
| GO:0000278 | mitotic cell cycle                                                                      | 0.0024  | 0.035906 | 44  | 907  |
| GO:0030198 | extracellular matrix organization                                                       | 0.00253 | 0.03779  | 4   | 21   |
| GO:0043062 | extracellular structure organization                                                    | 0.00253 | 0.03779  | 4   | 21   |
| GO:0003842 | 1-pyrroline-5-carboxylate dehydrogenase activity                                        | 0.00255 | 0.037968 | 2   | 3    |
| GO:0042625 | ATPase activity, coupled to transmembrane movement of ions                              | 0.00257 | 0.038146 | 13  | 180  |
| GO:0043401 | steroid hormone mediated signaling pathway                                              | 0.0026  | 0.038362 | 7   | 61   |
| GO:0048545 | response to steroid hormone                                                             | 0.0026  | 0.038362 | 7   | 61   |
| GO:0071383 | cellular response to steroid hormone stimulus                                           | 0.0026  | 0.038362 | 7   | 61   |
| GO:0008037 | cell recognition                                                                        | 0.00276 | 0.040675 | 4   | 25   |
| GO:0072511 | divalent inorganic cation transport                                                     | 0.00277 | 0.040713 | 30  | 535  |
| GO:0009067 | aspartate family amino acid biosynthetic process                                        | 0.00286 | 0.041917 | 6   | 53   |
| GO:0018966 | styrene metabolic process                                                               | 0.00289 | 0.042161 | 4   | 20   |
| GO:0042207 | styrene catabolic process                                                               | 0.00289 | 0.042161 | 4   | 20   |
| GO:1900673 | olefin metabolic process                                                                | 0.00289 | 0.042161 | 4   | 20   |
| GO:1901575 | organic substance catabolic process                                                     | 0.00292 | 0.042501 | 104 | 2588 |
| GO:0044445 | cytosolic part                                                                          | 0.00293 | 0.042537 | 17  | 261  |
| GO:0071396 | cellular response to lipid                                                              | 0.00302 | 0.043802 | 7   | 64   |
| GO:0005829 | cytosol                                                                                 | 0.00314 | 0.045338 | 22  | 384  |

|            |                                                        |         |          |     |      |
|------------|--------------------------------------------------------|---------|----------|-----|------|
| GO:0009607 | response to biotic stimulus                            | 0.00317 | 0.045531 | 31  | 614  |
| GO:0051186 | cofactor metabolic process                             | 0.00318 | 0.045531 | 58  | 1347 |
| GO:0009064 | glutamine family amino acid metabolic process          | 0.00319 | 0.045531 | 19  | 320  |
| GO:0004656 | procollagen-proline 4-dioxygenase activity             | 0.00322 | 0.045531 | 5   | 27   |
| GO:0018126 | protein hydroxylation                                  | 0.00322 | 0.045531 | 5   | 27   |
| GO:0018401 | peptidyl-proline hydroxylation to 4-hydroxy-L-proline  | 0.00322 | 0.045531 | 5   | 27   |
| GO:0019471 | 4-hydroxyproline metabolic process                     | 0.00322 | 0.045531 | 5   | 27   |
| GO:0019511 | peptidyl-proline hydroxylation                         | 0.00322 | 0.045531 | 5   | 27   |
| GO:0019798 | procollagen-proline dioxygenase activity               | 0.00322 | 0.045531 | 5   | 27   |
| GO:0031543 | peptidyl-proline dioxygenase activity                  | 0.00322 | 0.045531 | 5   | 27   |
| GO:0031545 | peptidyl-proline 4-dioxygenase activity                | 0.00322 | 0.045531 | 5   | 27   |
| GO:0034645 | cellular macromolecule biosynthetic process            | 0.00339 | 0.0478   | 256 | 7323 |
| GO:0042537 | benzene-containing compound metabolic process          | 0.00346 | 0.048794 | 10  | 119  |
| GO:0055086 | nucleobase-containing small molecule metabolic process | 0.00348 | 0.048912 | 91  | 2365 |
| GO:0006753 | nucleoside phosphate metabolic process                 | 0.0035  | 0.049058 | 65  | 1608 |
| GO:0051146 | striated muscle cell differentiation                   | 0.00357 | 0.049953 | 6   | 42   |
